# Supplementary material for: The Transcriptome Response to Azole Compounds in Aspergillus fumigatus Shows Differential Gene Expression across Pathways Essential for Azole Resistance and Cell Survival
Source: MDPI journal article supplement (doi:10.3390/jof9080807), 2023-07-30
Supplement: s1 [file s1]

**Table S2** – Reads and coverage calculations. The samples have been analyzed by comparing each duplicate of azole treated samples to the 4 DMSO treated samples per isolate. The DMSO treated samples from isolate V147-03 conducted in another analysis were compared to an untreated sample of the same isolate.

| Filename                              | Isolate             | Treatment | Batch | # of Reads | Uniquely mapped reads | % of uniquely mapped reads | Coverage |
|---------------------------------------|---------------------|-----------|-------|------------|-----------------------|----------------------------|----------|
| V14703ITR01_R1.fastq.gz.Log.final     | 147-03              | DMSO1     | 1     | 19052170   | 13.599.697            | 71.38%                     | 70,83    |
| V14703ITR02_R1.fastq.gz.Log.final     | (S)                 | DMSO2     | 1     | 11904577   | 9.203.922             | 77.31%                     | 47,94    |
| S11-147D_R1.fq.gz.Log.final           |                     | DMSO1     | 2     | 26505688   | 25.138.574            | 94.84%                     | 174,57   |
| S12-147D_R1.fq.gz.Log.final           |                     | DMSO2     | 2     | 26505165   | 25.016.300            | 94.38%                     | 173,72   |
| V14703ITR50IC1_R1.fastq.gz.Log.final  |                     | ICZ1      | 1     | 9869332    | 6.235.921             | 63.18%                     | 32,48    |
| V14703ITR50IC2_R1.fastq.gz.Log.final  |                     | ICZ2      | 1     | 21676321   | 15.835.383            | 73.05%                     | 82,48    |
| S9-147I_R1.fq.gz.Log.final            |                     | ISA1      | 2     | 26530604   | 25.012.911            | 94.28%                     | 173,70   |
| S10-147I_R1.fq.gz.Log.final           |                     | ISA2      | 2     | 25443142   | 17.936.379            | 70.50%                     | 124,56   |
| V16206_1_48_R1.fastq.gz.Log.final     | 162-06              | DMSO1     | 1     | 18954239   | 14.390.885            | 75.92%                     | 74,95    |
| V16206_2_48_R1.fastq.gz.Log.final     | (R)                 | DMSO2     | 1     | 15869377   | 13.029.305            | 82.10%                     | 67,86    |
| Z11-162D_R1.fq.gz.Log.final           |                     | DMSO1     | 2     | 23622002   | 22.674.165            | 95.99%                     | 157,46   |
| Z12-162D_R1.fq.gz.Log.final           |                     | DMSO2     | 2     | 22560814   | 21.714.395            | 96.25%                     | 150,79   |
| V16206_1_48ITRA_R1.fastq.gz.Log.final |                     | ICZ1      | 1     | 15045692   | 12.592.887            | 83.70%                     | 65,59    |
| V16206_2_48ITRA_R1.fastq.gz.Log.final |                     | ICZ2      | 1     | 22093677   | 18.134.435            | 82.08%                     | 94,45    |
| R9-162I_R1.fq.gz.Log.final            |                     | ISA1      | 2     | 25136148   | 24.197.186            | 96.26%                     | 168,04   |
| Z10-162I_R1.fq.gz.Log.final           |                     | ISA2      | 2     | 26147354   | 24.874.645            | 95.13%                     | 172,74   |
| V18130ITR01_R1.fastq.gz.Log.final     | 181-30              | DMSO1     | 1     | 17682151   | 14.359.777            | 81.21%                     | 74,79    |
| V18130ITR02_R1.fastq.gz.Log.final     | (R <sup>PAN</sup> ) | DMSO2     | 1     | 21619612   | 18.431.053            | 85.25%                     | 96,00    |
| R5-181D_R1.fq.gz.Log.final            |                     | DMSO1     | 2     | 26527964   | 25.617.320            | 96.57%                     | 177,90   |
| R6-181D_R1.fq.gz.Log.final            |                     | DMSO2     | 2     | 25313651   | 24.451.195            | 96.59%                     | 169,80   |
| V18130ITR50IC1_R1.fastq.gz.Log.final  |                     | ICZ1      | 1     | 11502052   | 9.416.369             | 81.87%                     | 49,04    |
| V18130ITR50IC2_R1.fastq.gz.Log.final  |                     | ICZ2      | 1     | 16487061   | 10.720.840            | 65.03%                     | 55,84    |
| R3-181I_R1.fq.gz.Log.final            |                     | ISA1      | 2     | 26404509   | 25.464.235            | 96.44%                     | 176,83   |
| R4-181I_R1.fq.gz.Log.final            |                     | ISA2      | 2     | 25290468   | 24.041.671            | 95.06%                     | 166,96   |
| <u>DMSO control isol</u>              |                     |           |       |            |                       |                            |          |
| D8-147_R1.fq.gz.Log.final             | 147-03              | N/A       | 1     | 26340914   | 21846481              | 82.94%                     | 151,71   |
| D5-147D_R1.fq.gz.Log.final            | (S)                 | DMSO1     | 1     | 25256166   | 24090060              | 95.38%                     | 167,29   |
| D6-147D_R1.fq.gz.Log.final            |                     | DMSO2     | 2     | 26241306   | 25009394              | 95.31%                     | 173,68   |
