# Supplementary material for: The Transcriptome Response to Azole Compounds in Aspergillus fumigatus Shows Differential Gene Expression across Pathways Essential for Azole Resistance and Cell Survival
Source: MDPI journal article supplement (doi:10.3390/jof9080807), 2023-07-30
Supplement: s1 [file s1]

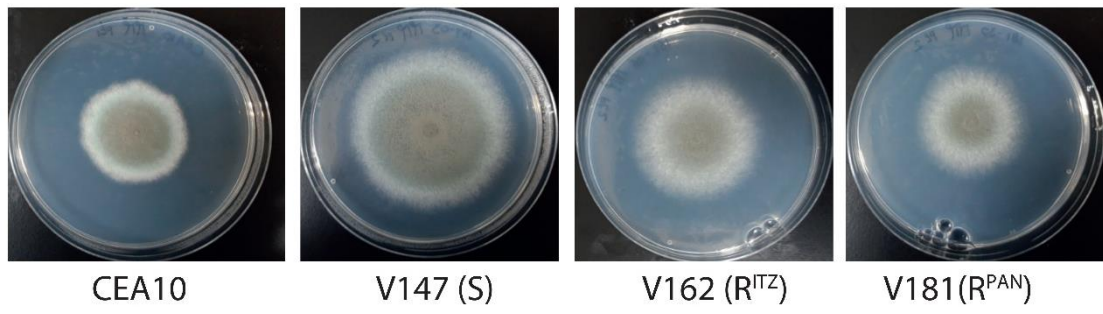

**Figure S1** – Colony morphology of *A. fumigatus* isolates used in this study. Reference isolate CEA10 was added for comparison. Isolates were grown for 4d at 37°C on AMM.
