# Supplementary material for: The Transcriptome Response to Azole Compounds in Aspergillus fumigatus Shows Differential Gene Expression across Pathways Essential for Azole Resistance and Cell Survival
Source: J Fungi (Basel). 2023 Jul 30;9(8):807. doi: 10.3390/jof9080807 (PMC10455693; doi:10.3390/jof9080807)
Supplement: Supplementary file 1 [file jof-09-00807-s001.zip]

Archive with 8 entries (8 files):
- Figure S1.pdf
- Table S1 ¿C Complete list of DEseq2 results.xlsx
- Table S2.pdf
- Table S3 All DEGs after DMSO treatment.xlsx
- Table S4 ¿C List of DEGs found after Venn analysis.xlsx
- Table S5 ¿C Complete list of DEseq2 results.xlsx
- Table S6 - Base expression R vs S.xlsx
- Table S7 GO analysis results.xls
