# Supplementary material for: The Transcriptome Response to Azole Compounds in Aspergillus fumigatus Shows Differential Gene Expression across Pathways Essential for Azole Resistance and Cell Survival
Source: J Fungi (Basel). 2023 Jul 30;9(8):807. doi: 10.3390/jof9080807 (PMC10455693; doi:10.3390/jof9080807)
Supplement: Supplementary file 1 [file jof-09-00807-s001.zip › Table S1 ¿C Complete list of DEseq2 results.xlsx]

## Sheet: All results
	baseMean	log2FoldChange	lfcSE	stat	pvalue	padj	Treatment	Isolate
CADAFUAG00000001	4698.13	1.62214	0.118557	13.6823	1.29522e-42	4.30569e-41	Itra	147	CADAFUAG00000001	AFUA_3G01196	Afu3G01196	Putative uncharacterized protein [Source:UniProtKB/TrEMBL
CADAFUAG00000001	4698.13	2.0386	0.117706	17.3195	3.35472e-67	5.15603e-65	Isa	147	CADAFUAG00000001	AFUA_3G01196	Afu3G01196	Putative uncharacterized protein [Source:UniProtKB/TrEMBL
CADAFUAG00000002	592.066	0.713591	0.140013	5.09662	3.45774e-07	1.61048e-06	Itra	147	CADAFUAG00000002	AFUA_3G04060	Afu3G04060	SNF7 family protein Fti1/Did2; putative [Source:UniProtKB/TrEMBL
CADAFUAG00000002	592.066	0.981529	0.125897	7.79631	6.37425e-15	8.41364e-14	Isa	147	CADAFUAG00000002	AFUA_3G04060	Afu3G04060	SNF7 family protein Fti1/Did2; putative [Source:UniProtKB/TrEMBL
CADAFUAG00000003	4.91184	-1.88447	1.45111	-1.29863	0.19407	0.28954	Itra	147	CADAFUAG00000003	AFUA_3G03160	Afu3G03160	Glycerol dehydrogenase (GCY1); putative [Source:UniProtKB/TrEMBL
CADAFUAG00000003	4.91184	-0.581291	0.988941	-0.587792	0.556672	0.699737	Isa	147	CADAFUAG00000003	AFUA_3G03160	Afu3G03160	Glycerol dehydrogenase (GCY1); putative [Source:UniProtKB/TrEMBL
CADAFUAG00000004	0	NA	NA	NA	NA	NA	Itra	147	CADAFUAG00000004	AFUA_3G02630	Afu3G02630	Putative uncharacterized protein [Source:UniProtKB/TrEMBL
CADAFUAG00000004	0	NA	NA	NA	NA	NA	Isa	147	CADAFUAG00000004	AFUA_3G02630	Afu3G02630	Putative uncharacterized protein [Source:UniProtKB/TrEMBL
CADAFUAG00000005	11.3975	0.907726	0.776684	1.16872	0.242516	0.347382	Itra	147	CADAFUAG00000005	AFUA_3G01040	Afu3G01040	Putative uncharacterized protein [Source:UniProtKB/TrEMBL
CADAFUAG00000005	11.3975	-0.147758	0.673747	-0.219308	0.82641	0.898978	Isa	147	CADAFUAG00000005	AFUA_3G01040	Afu3G01040	Putative uncharacterized protein [Source:UniProtKB/TrEMBL
CADAFUAG00000006	0	NA	NA	NA	NA	NA	Itra	147	CADAFUAG00000006	AFUA_3G02580	Afu3G02580	Short-chain dehydrogenase/reductase family protein; putative [Source:UniProtKB/TrEMBL
CADAFUAG00000006	0	NA	NA	NA	NA	NA	Isa	147	CADAFUAG00000006	AFUA_3G02580	Afu3G02580	Short-chain dehydrogenase/reductase family protein; putative [Source:UniProtKB/TrEMBL
CADAFUAG00000007	37.4827	0.34871	0.437477	0.797094	0.425396	0.541408	Itra	147	CADAFUAG00000007	AFUA_3G01010	Afu3G01010	Alpha-ketoglutarate-dependent taurine dioxygenase [Source:UniProtKB/TrEMBL
CADAFUAG00000007	37.4827	0.139189	0.377348	0.368861	0.712231	0.821798	Isa	147	CADAFUAG00000007	AFUA_3G01010	Afu3G01010	Alpha-ketoglutarate-dependent taurine dioxygenase [Source:UniProtKB/TrEMBL
CADAFUAG00000008	109.129	-2.73593	0.456039	-5.99932	1.98148e-09	1.1736e-08	Itra	147	CADAFUAG00000008	AFUA_3G02060	Afu3G02060	MFS multidrug transporter; putative [Source:UniProtKB/TrEMBL
CADAFUAG00000008	109.129	1.67276	0.220722	7.57858	3.49365e-14	4.28113e-13	Isa	147	CADAFUAG00000008	AFUA_3G02060	Afu3G02060	MFS multidrug transporter; putative [Source:UniProtKB/TrEMBL
CADAFUAG00000009	123.444	0.243794	0.256342	0.951049	0.34158	0.456649	Itra	147	CADAFUAG00000009	AFUA_3G00140	Afu3G00140	Putative uncharacterized protein [Source:UniProtKB/TrEMBL
CADAFUAG00000009	123.444	0.332953	0.22251	1.49635	0.134562	0.245367	Isa	147	CADAFUAG00000009	AFUA_3G00140	Afu3G00140	Putative uncharacterized protein [Source:UniProtKB/TrEMBL
CADAFUAG00000010	4471.24	0.329369	0.158166	2.08243	0.0373035	0.0714946	Itra	147	CADAFUAG00000010	AFUA_3G03060	Afu3G03060	Cell wall protein PhiA [Source:UniProtKB/TrEMBL
CADAFUAG00000010	4471.24	-0.967574	0.155889	-6.20683	5.40651e-10	4.63824e-09	Isa	147	CADAFUAG00000010	AFUA_3G03060	Afu3G03060	Cell wall protein PhiA [Source:UniProtKB/TrEMBL
CADAFUAG00000011	1059.58	6.3976	0.215172	29.7325	2.91854e-194	2.11953e-191	Itra	147	CADAFUAG00000011	AFUA_3G01960	Afu3G01960	Putative uncharacterized protein [Source:UniProtKB/TrEMBL
CADAFUAG00000011	1059.58	4.16297	0.20694	20.1168	5.26044e-90	1.90807e-87	Isa	147	CADAFUAG00000011	AFUA_3G01960	Afu3G01960	Putative uncharacterized protein [Source:UniProtKB/TrEMBL
CADAFUAG00000012	10.9599	0.885726	0.735324	1.20454	0.228381	0.330665	Itra	147	CADAFUAG00000012	AFUA_3G03960	Afu3G03960	Putative uncharacterized protein [Source:UniProtKB/TrEMBL
CADAFUAG00000012	10.9599	0.658881	0.762873	0.863684	0.387762	0.547102	Isa	147	CADAFUAG00000012	AFUA_3G03960	Afu3G03960	Putative uncharacterized protein [Source:UniProtKB/TrEMBL
CADAFUAG00000013	14.379	2.48957	0.769478	3.2354	0.00121473	0.00334449	Itra	147	CADAFUAG00000013	AFUA_3G01300	Afu3G01300	Putative uncharacterized protein [Source:UniProtKB/TrEMBL
CADAFUAG00000013	14.379	0.651131	0.601136	1.08317	0.278735	0.430737	Isa	147	CADAFUAG00000013	AFUA_3G01300	Afu3G01300	Putative uncharacterized protein [Source:UniProtKB/TrEMBL
CADAFUAG00000014	0.320297	-1.64131	4.4514	-0.368717	0.712339	NA	Itra	147	CADAFUAG00000014	AFUA_3G01730	Afu3G01730	Putative uncharacterized protein [Source:UniProtKB/TrEMBL
CADAFUAG00000014	0.320297	0.216429	4.56661	0.0473939	0.962199	NA	Isa	147	CADAFUAG00000014	AFUA_3G01730	Afu3G01730	Putative uncharacterized protein [Source:UniProtKB/TrEMBL
CADAFUAG00000015	762.07	1.06696	0.132547	8.04967	8.30188e-16	8.24164e-15	Itra	147	CADAFUAG00000015	AFUA_3G00540	Afu3G00540	MFS peptide transporter; putative [Source:UniProtKB/TrEMBL
CADAFUAG00000015	762.07	0.806053	0.123888	6.50632	7.70121e-11	7.19203e-10	Isa	147	CADAFUAG00000015	AFUA_3G00540	Afu3G00540	MFS peptide transporter; putative [Source:UniProtKB/TrEMBL
CADAFUAG00000016	10505.9	1.47918	0.0964722	15.3327	4.62206e-53	2.09793e-51	Itra	147	CADAFUAG00000016	AFUA_3G01900	Afu3G01900	Putative uncharacterized protein [Source:UniProtKB/TrEMBL
CADAFUAG00000016	10505.9	0.320818	0.0943851	3.39904	0.000676238	0.00248869	Isa	147	CADAFUAG00000016	AFUA_3G01900	Afu3G01900	Putative uncharacterized protein [Source:UniProtKB/TrEMBL
CADAFUAG00000017	31.7156	1.2917	0.493372	2.61811	0.00884172	0.0199414	Itra	147	CADAFUAG00000017	AFUA_3G01030	Afu3G01030	RTA1 domain protein; putative [Source:UniProtKB/TrEMBL
CADAFUAG00000017	31.7156	1.63785	0.502842	3.2572	0.00112518	0.00394707	Isa	147	CADAFUAG00000017	AFUA_3G01030	Afu3G01030	RTA1 domain protein; putative [Source:UniProtKB/TrEMBL
CADAFUAG00000018	6.21002	-1.67655	1.13108	-1.48225	0.138272	0.218958	Itra	147	CADAFUAG00000018	AFUA_3G01540	Afu3G01540	MFS monocarboxylate transporter; putative [Source:UniProtKB/TrEMBL
CADAFUAG00000018	6.21002	0.8669	0.950751	0.911806	0.361871	0.519709	Isa	147	CADAFUAG00000018	AFUA_3G01540	Afu3G01540	MFS monocarboxylate transporter; putative [Source:UniProtKB/TrEMBL
CADAFUAG00000019	5.99157	0.515671	1.10224	0.467837	0.639901	0.732191	Itra	147	CADAFUAG00000019	AFUA_3G00430	Afu3G00430	High-affinity glucose transporter; putative [Source:UniProtKB/TrEMBL
CADAFUAG00000019	5.99157	-1.95169	0.916591	-2.12929	0.0332305	0.0778842	Isa	147	CADAFUAG00000019	AFUA_3G00430	Afu3G00430	High-affinity glucose transporter; putative [Source:UniProtKB/TrEMBL
CADAFUAG00000020	10.3487	-1.54513	1.01149	-1.52758	0.126618	0.20361	Itra	147	CADAFUAG00000020	AFUA_3G00100	Afu3G00100	Flavin-containing amine oxidase; putative [Source:UniProtKB/TrEMBL
CADAFUAG00000020	10.3487	0.331017	0.663659	0.498776	0.617937	0.750731	Isa	147	CADAFUAG00000020	AFUA_3G00100	Afu3G00100	Flavin-containing amine oxidase; putative [Source:UniProtKB/TrEMBL
CADAFUAG00000021	453.665	-0.26824	0.158379	-1.69366	0.0903301	0.152833	Itra	147	CADAFUAG00000021	AFUA_3G04160	Afu3G04160	Ser/Thr protein phosphatase family [Source:UniProtKB/TrEMBL
CADAFUAG00000021	453.665	-0.150038	0.132293	-1.13413	0.256738	0.404245	Isa	147	CADAFUAG00000021	AFUA_3G04160	Afu3G04160	Ser/Thr protein phosphatase family [Source:UniProtKB/TrEMBL
CADAFUAG00000022	0	NA	NA	NA	NA	NA	Itra	147	CADAFUAG00000022	AFUA_3G03690	Afu3G03690	Putative uncharacterized protein [Source:UniProtKB/TrEMBL
CADAFUAG00000022	0	NA	NA	NA	NA	NA	Isa	147	CADAFUAG00000022	AFUA_3G03690	Afu3G03690	Putative uncharacterized protein [Source:UniProtKB/TrEMBL
CADAFUAG00000023	2.13126	3.22839	2.18824	1.47534	0.140122	0.22133	Itra	147	CADAFUAG00000023	AFUA_3G02930	Afu3G02930	Extracellular soluble lytic transglycosylase; putative [Source:UniProtKB/TrEMBL
CADAFUAG00000023	2.13126	-0.871173	1.4616	-0.596041	0.551148	NA	Isa	147	CADAFUAG00000023	AFUA_3G02930	Afu3G02930	Extracellular soluble lytic transglycosylase; putative [Source:UniProtKB/TrEMBL
CADAFUAG00000024	243.046	0.0279479	0.191107	0.146242	0.88373	0.920996	Itra	147	CADAFUAG00000024	AFUA_3G02320	Afu3G02320	C2H2 finger domain protein (Kin17); putative [Source:UniProtKB/TrEMBL
CADAFUAG00000024	243.046	0.288892	0.167452	1.72522	0.0844872	0.170027	Isa	147	CADAFUAG00000024	AFUA_3G02320	Afu3G02320	C2H2 finger domain protein (Kin17); putative [Source:UniProtKB/TrEMBL
CADAFUAG00000025	13.8511	-0.176005	0.782471	-0.224935	0.82203	0.874947	Itra	147	CADAFUAG00000025	AFUA_3G01170	Afu3G01170	Cystathionine beta-lyase [Source:UniProtKB/TrEMBL
CADAFUAG00000025	13.8511	-0.276253	0.582748	-0.474053	0.635462	0.763228	Isa	147	CADAFUAG00000025	AFUA_3G01170	Afu3G01170	Cystathionine beta-lyase [Source:UniProtKB/TrEMBL
CADAFUAG00000026	147.248	-2.75541	0.335954	-8.20174	2.36936e-16	2.43672e-15	Itra	147	CADAFUAG00000026	AFUA_3G03650	Afu3G03650	GNAT family acetyltransferase; putative [Source:UniProtKB/TrEMBL
CADAFUAG00000026	147.248	-2.77454	0.247616	-11.205	3.85294e-29	1.22162e-27	Isa	147	CADAFUAG00000026	AFUA_3G03650	Afu3G03650	GNAT family acetyltransferase; putative [Source:UniProtKB/TrEMBL
CADAFUAG00000027	8093.42	0.104331	0.105236	0.991403	0.321489	0.435815	Itra	147	CADAFUAG00000027	AFUA_3G00500	Afu3G00500	Integral membrane protein [Source:UniProtKB/TrEMBL
CADAFUAG00000027	8093.42	-0.442216	0.10324	-4.28336	1.84091e-05	8.90312e-05	Isa	147	CADAFUAG00000027	AFUA_3G00500	Afu3G00500	Integral membrane protein [Source:UniProtKB/TrEMBL
CADAFUAG00000028	33.8503	0.722238	0.518685	1.39244	0.163789	0.251764	Itra	147	CADAFUAG00000028	AFUA_3G03510	Afu3G03510	4-hydroxyphenylpyruvate dioxygenase; putative [Source:UniProtKB/TrEMBL
CADAFUAG00000028	33.8503	0.547798	0.405174	1.35201	0.176372	0.302048	Isa	147	CADAFUAG00000028	AFUA_3G03510	Afu3G03510	4-hydroxyphenylpyruvate dioxygenase; putative [Source:UniProtKB/TrEMBL
CADAFUAG00000029	1369.01	-0.342519	0.12579	-2.72295	0.00647018	0.0151576	Itra	147	CADAFUAG00000029	AFUA_3G03290	Afu3G03290	Putative uncharacterized protein [Source:UniProtKB/TrEMBL
CADAFUAG00000029	1369.01	0.51747	0.124808	4.14614	3.38129e-05	0.000156596	Isa	147	CADAFUAG00000029	AFUA_3G03290	Afu3G03290	Putative uncharacterized protein [Source:UniProtKB/TrEMBL
CADAFUAG00000030	7.48455	1.01277	0.951439	1.06446	0.287122	0.398518	Itra	147	CADAFUAG00000030	AFUA_3G01700	Afu3G01700	MFS alpha-glucoside transporter; putative [Source:UniProtKB/TrEMBL
CADAFUAG00000030	7.48455	-0.479649	0.862617	-0.556039	0.578184	0.717788	Isa	147	CADAFUAG00000030	AFUA_3G01700	Afu3G01700	MFS alpha-glucoside transporter; putative [Source:UniProtKB/TrEMBL
CADAFUAG00000031	568.21	2.61216	0.152543	17.1241	9.81228e-66	6.86205e-64	Itra	147	CADAFUAG00000031	AFUA_3G00870	Afu3G00870	GNAT family N-acetyltransferase; putative [Source:UniProtKB/TrEMBL
CADAFUAG00000031	568.21	1.48322	0.150545	9.85233	6.69709e-23	1.49212e-21	Isa	147	CADAFUAG00000031	AFUA_3G00870	Afu3G00870	GNAT family N-acetyltransferase; putative [Source:UniProtKB/TrEMBL
CADAFUAG00000032	47.1054	-0.336367	0.404789	-0.830969	0.405991	0.522131	Itra	147	CADAFUAG00000032	AFUA_3G00360	Afu3G00360	Riboflavin biosynthesis protein Rib7; putative [Source:UniProtKB/TrEMBL
CADAFUAG00000032	47.1054	0.124642	0.325843	0.382521	0.702075	0.814224	Isa	147	CADAFUAG00000032	AFUA_3G00360	Afu3G00360	Riboflavin biosynthesis protein Rib7; putative [Source:UniProtKB/TrEMBL
CADAFUAG00000033	257.696	1.79661	0.195498	9.18994	3.93052e-20	5.17546e-19	Itra	147	CADAFUAG00000033	AFUA_3G00280	Afu3G00280	Metallo-beta-lactamase domain protein; putative [Source:UniProtKB/TrEMBL
CADAFUAG00000033	257.696	0.12805	0.172613	0.741833	0.458188	0.614112	Isa	147	CADAFUAG00000033	AFUA_3G00280	Afu3G00280	Metallo-beta-lactamase domain protein; putative [Source:UniProtKB/TrEMBL
CADAFUAG00000034	1.71782	4.23755	2.23186	1.89866	0.0576091	0.104014	Itra	147	CADAFUAG00000034	AFUA_3G00550	Afu3G00550	Putative uncharacterized protein [Source:UniProtKB/TrEMBL
CADAFUAG00000034	1.71782	0.939083	1.78506	0.526078	0.598834	NA	Isa	147	CADAFUAG00000034	AFUA_3G00550	Afu3G00550	Putative uncharacterized protein [Source:UniProtKB/TrEMBL
CADAFUAG00000035	3226.55	0.847005	0.120421	7.03369	2.01148e-12	1.54143e-11	Itra	147	CADAFUAG00000035	AFUA_3G03610	Afu3G03610	Putative uncharacterized protein [Source:UniProtKB/TrEMBL
CADAFUAG00000035	3226.55	-0.046789	0.118292	-0.395539	0.692445	0.806874	Isa	147	CADAFUAG00000035	AFUA_3G03610	Afu3G03610	Putative uncharacterized protein [Source:UniProtKB/TrEMBL
CADAFUAG00000036	0.905441	2.59374	2.8742	0.902423	0.366832	0.482483	Itra	147	CADAFUAG00000036	AFUA_3G00610	Afu3G00610	Glucoamylase [Source:UniProtKB/TrEMBL
CADAFUAG00000036	0.905441	-2.17093	2.66091	-0.815858	0.414581	NA	Isa	147	CADAFUAG00000036	AFUA_3G00610	Afu3G00610	Glucoamylase [Source:UniProtKB/TrEMBL
CADAFUAG00000037	0.312046	0.813885	4.69922	0.173196	0.862498	NA	Itra	147	CADAFUAG00000037	AFUA_3G02420	Afu3G02420	ThiJ/PfpI family transcriptional regulator; putative [Source:UniProtKB/TrEMBL
CADAFUAG00000037	0.312046	-1.15216	4.50766	-0.255601	0.798259	NA	Isa	147	CADAFUAG00000037	AFUA_3G02420	Afu3G02420	ThiJ/PfpI family transcriptional regulator; putative [Source:UniProtKB/TrEMBL
CADAFUAG00000038	529.947	-1.75515	0.156156	-11.2397	2.60294e-29	5.09842e-28	Itra	147	CADAFUAG00000038	AFUA_3G04150	Afu3G04150	Mitochondrial enoyl reductase; putative [Source:UniProtKB/TrEMBL
CADAFUAG00000038	529.947	-0.0809679	0.128336	-0.630907	0.528101	0.675719	Isa	147	CADAFUAG00000038	AFUA_3G04150	Afu3G04150	Mitochondrial enoyl reductase; putative [Source:UniProtKB/TrEMBL
CADAFUAG00000039	4586.63	0.112375	0.0989028	1.13621	0.255867	0.362927	Itra	147	CADAFUAG00000039	AFUA_3G03720	Afu3G03720	Putative uncharacterized protein [Source:UniProtKB/TrEMBL
CADAFUAG00000039	4586.63	-0.639724	0.0951578	-6.72277	1.78299e-11	1.75822e-10	Isa	147	CADAFUAG00000039	AFUA_3G03720	Afu3G03720	Putative uncharacterized protein [Source:UniProtKB/TrEMBL
CADAFUAG00000040	33.0574	1.28552	0.499739	2.57238	0.0101003	0.0224899	Itra	147	CADAFUAG00000040	AFUA_3G02530	Afu3G02530	PKS-like enzyme; putative [Source:UniProtKB/TrEMBL
CADAFUAG00000040	33.0574	0.0518649	0.397491	0.13048	0.896186	0.939686	Isa	147	CADAFUAG00000040	AFUA_3G02530	Afu3G02530	PKS-like enzyme; putative [Source:UniProtKB/TrEMBL
CADAFUAG00000041	641.181	0.0347835	0.157938	0.220235	0.825688	0.87795	Itra	147	CADAFUAG00000041	AFUA_3G02280	Afu3G02280	Alpha;alpha-trehalose glucohydrolase TreA/Ath1 [Source:UniProtKB/TrEMBL
CADAFUAG00000041	641.181	-1.32011	0.135899	-9.71386	2.63175e-22	5.62847e-21	Isa	147	CADAFUAG00000041	AFUA_3G02280	Afu3G02280	Alpha;alpha-trehalose glucohydrolase TreA/Ath1 [Source:UniProtKB/TrEMBL
CADAFUAG00000042	48.7943	-1.8601	0.43913	-4.23588	2.27659e-05	8.36966e-05	Itra	147	CADAFUAG00000042	AFUA_3G01610	Afu3G01610	Putative uncharacterized protein [Source:UniProtKB/TrEMBL
CADAFUAG00000042	48.7943	-1.47274	0.337281	-4.36652	1.2624e-05	6.30711e-05	Isa	147	CADAFUAG00000042	AFUA_3G01610	Afu3G01610	Putative uncharacterized protein [Source:UniProtKB/TrEMBL
CADAFUAG00000043	15.2782	-4.71826	1.16126	-4.06304	4.84373e-05	0.000169872	Itra	147	CADAFUAG00000043	AFUA_3G02990	Afu3G02990	Putative uncharacterized protein [Source:UniProtKB/TrEMBL
CADAFUAG00000043	15.2782	-0.568127	0.694487	-0.818053	0.413327	0.573359	Isa	147	CADAFUAG00000043	AFUA_3G02990	Afu3G02990	Putative uncharacterized protein [Source:UniProtKB/TrEMBL
CADAFUAG00000044	263.261	-0.890422	0.200635	-4.43801	9.07937e-06	3.53624e-05	Itra	147	CADAFUAG00000044	AFUA_3G01760	Afu3G01760	Alpha/beta superfamily hydrolase; putative [Source:UniProtKB/TrEMBL
CADAFUAG00000044	263.261	-0.244831	0.174747	-1.40106	0.161196	0.281915	Isa	147	CADAFUAG00000044	AFUA_3G01760	Afu3G01760	Alpha/beta superfamily hydrolase; putative [Source:UniProtKB/TrEMBL
CADAFUAG00000045	22.6085	-1.42131	0.610441	-2.32833	0.0198948	0.0409744	Itra	147	CADAFUAG00000045	AFUA_3G03980	Afu3G03980	Cytochrome P450 monooxygenase; putative [Source:UniProtKB/TrEMBL
CADAFUAG00000045	22.6085	-1.33696	0.482842	-2.76895	0.00562377	0.0166004	Isa	147	CADAFUAG00000045	AFUA_3G03980	Afu3G03980	Cytochrome P450 monooxygenase; putative [Source:UniProtKB/TrEMBL
CADAFUAG00000046	0.125791	0	4.99746	0	1	NA	Itra	147	CADAFUAG00000046	AFUA_3G03890	Afu3G03890	Secretory lipase; putative [Source:UniProtKB/TrEMBL
CADAFUAG00000046	0.125791	2.35299	4.92001	0.478248	0.632473	NA	Isa	147	CADAFUAG00000046	AFUA_3G03890	Afu3G03890	Secretory lipase; putative [Source:UniProtKB/TrEMBL
CADAFUAG00000047	48.068	-0.0611517	0.401596	-0.152272	0.878973	0.917354	Itra	147	CADAFUAG00000047	AFUA_3G03020	Afu3G03020	Phosphoglucomutase; putative [Source:UniProtKB/TrEMBL
CADAFUAG00000047	48.068	-0.242454	0.32576	-0.744271	0.456712	0.613097	Isa	147	CADAFUAG00000047	AFUA_3G03020	Afu3G03020	Phosphoglucomutase; putative [Source:UniProtKB/TrEMBL
CADAFUAG00000048	1.55985	0.928948	2.07845	0.446942	0.654917	0.743158	Itra	147	CADAFUAG00000048	AFUA_3G00980	Afu3G00980	MFS transporter Liz1/Seo1; putative [Source:UniProtKB/TrEMBL
CADAFUAG00000048	1.55985	-0.20474	1.7714	-0.115581	0.907985	NA	Isa	147	CADAFUAG00000048	AFUA_3G00980	Afu3G00980	MFS transporter Liz1/Seo1; putative [Source:UniProtKB/TrEMBL
CADAFUAG00000049	900.787	-0.662794	0.13782	-4.80914	1.51583e-06	6.50204e-06	Itra	147	CADAFUAG00000049	AFUA_3G00240	Afu3G00240	TPR domain protein [Source:UniProtKB/TrEMBL
CADAFUAG00000049	900.787	-0.125174	0.123247	-1.01564	0.309803	0.465269	Isa	147	CADAFUAG00000049	AFUA_3G00240	Afu3G00240	TPR domain protein [Source:UniProtKB/TrEMBL
CADAFUAG00000050	2.67404	-3.67469	1.91538	-1.91852	0.0550448	0.100054	Itra	147	CADAFUAG00000050	AFUA_3G03880	Afu3G03880	Spherulin; putative [Source:UniProtKB/TrEMBL
CADAFUAG00000050	2.67404	1.20306	1.3634	0.882399	0.377561	NA	Isa	147	CADAFUAG00000050	AFUA_3G03880	Afu3G03880	Spherulin; putative [Source:UniProtKB/TrEMBL
CADAFUAG00000051	158.199	-1.84888	0.276064	-6.69731	2.12287e-11	1.5126e-10	Itra	147	CADAFUAG00000051	AFUA_3G02670	Afu3G02670	NRPS-like enzyme; putative [Source:UniProtKB/TrEMBL
CADAFUAG00000051	158.199	-1.57073	0.217962	-7.20644	5.74322e-13	6.35892e-12	Isa	147	CADAFUAG00000051	AFUA_3G02670	Afu3G02670	NRPS-like enzyme; putative [Source:UniProtKB/TrEMBL
CADAFUAG00000052	19.678	1.17543	0.628812	1.86928	0.061584	0.110137	Itra	147	CADAFUAG00000052	AFUA_3G01930	Afu3G01930	Putative uncharacterized protein [Source:UniProtKB/TrEMBL
CADAFUAG00000052	19.678	-0.119711	0.567557	-0.210923	0.832947	0.90338	Isa	147	CADAFUAG00000052	AFUA_3G01930	Afu3G01930	Putative uncharacterized protein [Source:UniProtKB/TrEMBL
CADAFUAG00000053	5410.1	0.507424	0.0997563	5.08664	3.64471e-07	1.68427e-06	Itra	147	CADAFUAG00000053	AFUA_3G01590	Afu3G01590	Putative uncharacterized protein [Source:UniProtKB/TrEMBL
CADAFUAG00000053	5410.1	-0.388295	0.0969876	-4.00355	6.23985e-05	0.000276149	Isa	147	CADAFUAG00000053	AFUA_3G01590	Afu3G01590	Putative uncharacterized protein [Source:UniProtKB/TrEMBL
CADAFUAG00000054	2933.9	-1.54859	0.110854	-13.9696	2.38931e-44	8.35462e-43	Itra	147	CADAFUAG00000054	AFUA_3G04220	Afu3G04220	Fatty acid synthase beta subunit; putative [Source:UniProtKB/TrEMBL
CADAFUAG00000054	2933.9	-0.277679	0.0955026	-2.90755	0.00364272	0.0113591	Isa	147	CADAFUAG00000054	AFUA_3G04220	Afu3G04220	Fatty acid synthase beta subunit; putative [Source:UniProtKB/TrEMBL
CADAFUAG00000055	154.28	1.30547	0.236382	5.52271	3.33819e-08	1.75185e-07	Itra	147	CADAFUAG00000055	AFUA_3G00175	Afu3G00175	Putative uncharacterized protein [Source:UniProtKB/TrEMBL
CADAFUAG00000055	154.28	0.517477	0.218058	2.37312	0.0176387	0.0451446	Isa	147	CADAFUAG00000055	AFUA_3G00175	Afu3G00175	Putative uncharacterized protein [Source:UniProtKB/TrEMBL
CADAFUAG00000056	0.447096	2.724	3.6905	0.738112	0.460446	NA	Itra	147	CADAFUAG00000056	AFUA_3G02150	Afu3G02150	MFS monocarboxylate transporter; putative [Source:UniProtKB/TrEMBL
CADAFUAG00000056	0.447096	-2.22625	3.64141	-0.611371	0.540954	NA	Isa	147	CADAFUAG00000056	AFUA_3G02150	Afu3G02150	MFS monocarboxylate transporter; putative [Source:UniProtKB/TrEMBL
CADAFUAG00000057	1469.04	-0.402333	0.126505	-3.18038	0.0014708	0.00397875	Itra	147	CADAFUAG00000057	AFUA_3G03410	Afu3G03410	Enoyl-CoA hydratase/isomerase family protein [Source:UniProtKB/TrEMBL
CADAFUAG00000057	1469.04	-1.14389	0.122641	-9.32716	1.0875e-20	2.1299e-19	Isa	147	CADAFUAG00000057	AFUA_3G03410	Afu3G03410	Enoyl-CoA hydratase/isomerase family protein [Source:UniProtKB/TrEMBL
CADAFUAG00000058	3.09211	1.22911	1.62439	0.756661	0.449253	0.564091	Itra	147	CADAFUAG00000058	AFUA_3G03220	Afu3G03220	Putative uncharacterized protein [Source:UniProtKB/TrEMBL
CADAFUAG00000058	3.09211	1.13418	1.44308	0.785947	0.431898	0.59045	Isa	147	CADAFUAG00000058	AFUA_3G03220	Afu3G03220	Putative uncharacterized protein [Source:UniProtKB/TrEMBL
CADAFUAG00000059	5.23528	-0.0413405	1.23996	-0.0333402	0.973403	0.983193	Itra	147	CADAFUAG00000059	AFUA_3G03810	Afu3G03810	Putative uncharacterized protein [Source:UniProtKB/TrEMBL
CADAFUAG00000059	5.23528	-1.66001	0.975522	-1.70166	0.0888191	0.176509	Isa	147	CADAFUAG00000059	AFUA_3G03810	Afu3G03810	Putative uncharacterized protein [Source:UniProtKB/TrEMBL
CADAFUAG00000060	45.3876	-0.401323	0.415061	-0.966902	0.333593	0.449216	Itra	147	CADAFUAG00000060	AFUA_3G03130	Afu3G03130	Putative uncharacterized protein [Source:UniProtKB/TrEMBL
CADAFUAG00000060	45.3876	-0.610034	0.344622	-1.77015	0.0767014	0.157146	Isa	147	CADAFUAG00000060	AFUA_3G03130	Afu3G03130	Putative uncharacterized protein [Source:UniProtKB/TrEMBL
CADAFUAG00000061	31.6451	-0.403054	0.509269	-0.791437	0.428689	0.544346	Itra	147	CADAFUAG00000061	AFUA_3G02850	Afu3G02850	Putative uncharacterized protein [Source:UniProtKB/TrEMBL
CADAFUAG00000061	31.6451	2.08403	0.423583	4.92001	8.65395e-07	5.05958e-06	Isa	147	CADAFUAG00000061	AFUA_3G02850	Afu3G02850	Putative uncharacterized protein [Source:UniProtKB/TrEMBL
CADAFUAG00000062	7.38837	0.167206	0.926238	0.180521	0.856744	0.900325	Itra	147	CADAFUAG00000062	AFUA_3G03480	Afu3G03480	Cytochrome P450 monooxygenase; putative [Source:UniProtKB/TrEMBL
CADAFUAG00000062	7.38837	-0.708084	0.870159	-0.813742	0.415793	0.575836	Isa	147	CADAFUAG00000062	AFUA_3G03480	Afu3G03480	Cytochrome P450 monooxygenase; putative [Source:UniProtKB/TrEMBL
CADAFUAG00000063	1986.24	-3.21235	0.137839	-23.305	3.94058e-120	9.0739e-118	Itra	147	CADAFUAG00000063	AFUA_3G03640	Afu3G03640	MFS siderochrome iron transporter MirB [Source:UniProtKB/TrEMBL
CADAFUAG00000063	1986.24	-3.89258	0.126194	-30.846	6.33472e-209	2.87216e-205	Isa	147	CADAFUAG00000063	AFUA_3G03640	Afu3G03640	MFS siderochrome iron transporter MirB [Source:UniProtKB/TrEMBL
CADAFUAG00000064	903.031	0.507546	0.131108	3.87121	0.000108297	0.000361324	Itra	147	CADAFUAG00000064	AFUA_3G03560	Afu3G03560	Pyridine nucleotide-disulfide oxidoreductase; putative [Source:UniProtKB/TrEMBL
CADAFUAG00000064	903.031	0.0494524	0.118257	0.418178	0.675817	0.79444	Isa	147	CADAFUAG00000064	AFUA_3G03560	Afu3G03560	Pyridine nucleotide-disulfide oxidoreductase; putative [Source:UniProtKB/TrEMBL
CADAFUAG00000065	49.7255	0.71245	0.356109	2.00065	0.0454297	0.0847632	Itra	147	CADAFUAG00000065	AFUA_3G01990	Afu3G01990	DUF636 domain protein [Source:UniProtKB/TrEMBL
CADAFUAG00000065	49.7255	-0.30678	0.345405	-0.888173	0.374448	0.533295	Isa	147	CADAFUAG00000065	AFUA_3G01990	Afu3G01990	DUF636 domain protein [Source:UniProtKB/TrEMBL
CADAFUAG00000066	139.962	0.776936	0.261465	2.97147	0.00296382	0.00749369	Itra	147	CADAFUAG00000066	AFUA_3G01860	Afu3G01860	Putative uncharacterized protein [Source:UniProtKB/TrEMBL
CADAFUAG00000066	139.962	0.486138	0.204335	2.37913	0.0173536	0.0445406	Isa	147	CADAFUAG00000066	AFUA_3G01860	Afu3G01860	Putative uncharacterized protein [Source:UniProtKB/TrEMBL
CADAFUAG00000067	89.3532	0.165843	0.31142	0.532539	0.594352	0.692751	Itra	147	CADAFUAG00000067	AFUA_3G00560	Afu3G00560	Putative uncharacterized protein [Source:UniProtKB/TrEMBL
CADAFUAG00000067	89.3532	2.14088	0.254554	8.41031	4.08939e-17	6.37158e-16	Isa	147	CADAFUAG00000067	AFUA_3G00560	Afu3G00560	Putative uncharacterized protein [Source:UniProtKB/TrEMBL
CADAFUAG00000068	4.97784	1.2512	1.24973	1.00118	0.31674	0.430885	Itra	147	CADAFUAG00000068	AFUA_3G00580	Afu3G00580	Putative uncharacterized protein [Source:UniProtKB/TrEMBL
CADAFUAG00000068	4.97784	0.722255	0.948532	0.761445	0.446391	0.60389	Isa	147	CADAFUAG00000068	AFUA_3G00580	Afu3G00580	Putative uncharacterized protein [Source:UniProtKB/TrEMBL
CADAFUAG00000069	22.5714	-1.40177	0.667172	-2.10106	0.0356357	0.0686185	Itra	147	CADAFUAG00000069	AFUA_3G02680	Afu3G02680	C6 finger domain protein; putative [Source:UniProtKB/TrEMBL
CADAFUAG00000069	22.5714	-0.457966	0.479522	-0.955049	0.339553	0.496144	Isa	147	CADAFUAG00000069	AFUA_3G02680	Afu3G02680	C6 finger domain protein; putative [Source:UniProtKB/TrEMBL
CADAFUAG00000070	5.58477	-2.01535	1.34941	-1.49351	0.135304	0.215124	Itra	147	CADAFUAG00000070	AFUA_3G03780	Afu3G03780	Putative uncharacterized protein [Source:UniProtKB/TrEMBL
CADAFUAG00000070	5.58477	0.71569	0.918316	0.779351	0.435773	0.594403	Isa	147	CADAFUAG00000070	AFUA_3G03780	Afu3G03780	Putative uncharacterized protein [Source:UniProtKB/TrEMBL
CADAFUAG00000071	8.02028	-1.64828	1.13278	-1.45507	0.14565	0.228297	Itra	147	CADAFUAG00000071	AFUA_3G02230	Afu3G02230	Putative uncharacterized protein [Source:UniProtKB/TrEMBL
CADAFUAG00000071	8.02028	0.0355538	0.871012	0.040819	0.96744	0.981951	Isa	147	CADAFUAG00000071	AFUA_3G02230	Afu3G02230	Putative uncharacterized protein [Source:UniProtKB/TrEMBL
CADAFUAG00000072	33.7458	-1.10205	0.501241	-2.19865	0.027903	0.0554477	Itra	147	CADAFUAG00000072	AFUA_3G01260	Afu3G01260	Acetyltransferase; GNAT family family [Source:UniProtKB/TrEMBL
CADAFUAG00000072	33.7458	-0.514701	0.437702	-1.17592	0.239629	0.383796	Isa	147	CADAFUAG00000072	AFUA_3G01260	Afu3G01260	Acetyltransferase; GNAT family family [Source:UniProtKB/TrEMBL
CADAFUAG00000073	3.44803	0.244636	1.4954	0.163592	0.870052	0.910863	Itra	147	CADAFUAG00000073	AFUA_3G03050	Afu3G03050	RNAse III; putative [Source:UniProtKB/TrEMBL
CADAFUAG00000073	3.44803	-0.420636	1.42366	-0.29546	0.767642	0.859692	Isa	147	CADAFUAG00000073	AFUA_3G03050	Afu3G03050	RNAse III; putative [Source:UniProtKB/TrEMBL
CADAFUAG00000074	93.6021	-0.762406	0.301246	-2.53084	0.011379	0.0249603	Itra	147	CADAFUAG00000074	AFUA_3G01420	Afu3G01420	DUF341 family oxidoreductase; putative [Source:UniProtKB/TrEMBL
CADAFUAG00000074	93.6021	0.062788	0.257339	0.24399	0.807239	0.885989	Isa	147	CADAFUAG00000074	AFUA_3G01420	Afu3G01420	DUF341 family oxidoreductase; putative [Source:UniProtKB/TrEMBL
CADAFUAG00000075	1.00336	-1.63424	2.71063	-0.602902	0.546574	0.650816	Itra	147	CADAFUAG00000075	AFUA_3G00400	Afu3G00400	Putative uncharacterized protein [Source:UniProtKB/TrEMBL
CADAFUAG00000075	1.00336	0.487702	2.27517	0.214359	0.830267	NA	Isa	147	CADAFUAG00000075	AFUA_3G00400	Afu3G00400	Putative uncharacterized protein [Source:UniProtKB/TrEMBL
CADAFUAG00000076	0.425412	0.689715	3.81419	0.180829	0.856502	NA	Itra	147	CADAFUAG00000076	AFUA_3G00600	Afu3G00600	Putative uncharacterized protein [Source:UniProtKB/TrEMBL
CADAFUAG00000076	0.425412	-2.19887	3.74766	-0.586733	0.557383	NA	Isa	147	CADAFUAG00000076	AFUA_3G00600	Afu3G00600	Putative uncharacterized protein [Source:UniProtKB/TrEMBL
CADAFUAG00000077	15.9798	-2.28692	0.853865	-2.67831	0.00739939	0.0170968	Itra	147	CADAFUAG00000077	AFUA_3G00770	Afu3G00770	Putative uncharacterized protein [Source:UniProtKB/TrEMBL
CADAFUAG00000077	15.9798	-1.28349	0.557021	-2.3042	0.0212113	0.053029	Isa	147	CADAFUAG00000077	AFUA_3G00770	Afu3G00770	Putative uncharacterized protein [Source:UniProtKB/TrEMBL
CADAFUAG00000078	1.35397	4.05398	4.85652	0.834751	0.403858	0.519896	Itra	147	CADAFUAG00000078	AFUA_3G00950	Afu3G00950	Ankyrin repeat protein [Source:UniProtKB/TrEMBL
CADAFUAG00000078	1.35397	3.80983	4.8345	0.78805	0.430667	NA	Isa	147	CADAFUAG00000078	AFUA_3G00950	Afu3G00950	Ankyrin repeat protein [Source:UniProtKB/TrEMBL
CADAFUAG00000079	3748.97	0.698164	0.102321	6.82329	8.89796e-12	6.49696e-11	Itra	147	CADAFUAG00000079	AFUA_3G03280	Afu3G03280	FAD binding monooxygenase; putative [Source:UniProtKB/TrEMBL
CADAFUAG00000079	3748.97	0.328851	0.0994082	3.30809	0.00093935	0.00335092	Isa	147	CADAFUAG00000079	AFUA_3G03280	Afu3G03280	FAD binding monooxygenase; putative [Source:UniProtKB/TrEMBL
CADAFUAG00000080	25626.7	-2.14233	0.101075	-21.1955	1.05175e-99	1.5515e-97	Itra	147	CADAFUAG00000080	AFUA_3G00730	Afu3G00730	Putative uncharacterized protein [Source:UniProtKB/TrEMBL
CADAFUAG00000080	25626.7	0.208402	0.0973944	2.13977	0.0323733	0.0762496	Isa	147	CADAFUAG00000080	AFUA_3G00730	Afu3G00730	Putative uncharacterized protein [Source:UniProtKB/TrEMBL
CADAFUAG00000081	31.9587	-0.17815	0.447428	-0.398165	0.690509	0.771399	Itra	147	CADAFUAG00000081	AFUA_3G04020	Afu3G04020	Conserved mitochondrial protein [Source:UniProtKB/TrEMBL
CADAFUAG00000081	31.9587	0.0592438	0.403885	0.146685	0.883381	0.934663	Isa	147	CADAFUAG00000081	AFUA_3G04020	Afu3G04020	Conserved mitochondrial protein [Source:UniProtKB/TrEMBL
CADAFUAG00000082	0.199143	-0.568467	4.98663	-0.113998	0.909239	NA	Itra	147	CADAFUAG00000082	AFUA_3G01720	Afu3G01720	Putative uncharacterized protein [Source:UniProtKB/TrEMBL
CADAFUAG00000082	0.199143	1.56734	4.98031	0.314707	0.752984	NA	Isa	147	CADAFUAG00000082	AFUA_3G01720	Afu3G01720	Putative uncharacterized protein [Source:UniProtKB/TrEMBL
CADAFUAG00000083	340.823	-0.600384	0.184916	-3.2468	0.0011671	0.00323032	Itra	147	CADAFUAG00000083	AFUA_3G01650	Afu3G01650	WSC domain protein; putative [Source:UniProtKB/TrEMBL
CADAFUAG00000083	340.823	-0.00351364	0.156896	-0.0223947	0.982133	0.989334	Isa	147	CADAFUAG00000083	AFUA_3G01650	Afu3G01650	WSC domain protein; putative [Source:UniProtKB/TrEMBL
CADAFUAG00000084	6.60584	-0.176223	1.09589	-0.160803	0.872248	0.912757	Itra	147	CADAFUAG00000084	AFUA_3G01120	Afu3G01120	MFS multidrug transporter; putative [Source:UniProtKB/TrEMBL
CADAFUAG00000084	6.60584	0.0123607	0.912862	0.0135406	0.989197	0.99424	Isa	147	CADAFUAG00000084	AFUA_3G01120	Afu3G01120	MFS multidrug transporter; putative [Source:UniProtKB/TrEMBL
CADAFUAG00000085	155.922	-0.341706	0.224474	-1.52225	0.127946	0.205536	Itra	147	CADAFUAG00000085	AFUA_3G04190	Afu3G04190	Putative uncharacterized protein [Source:UniProtKB/TrEMBL
CADAFUAG00000085	155.922	-0.0355346	0.202076	-0.175848	0.860414	0.91964	Isa	147	CADAFUAG00000085	AFUA_3G04190	Afu3G04190	Putative uncharacterized protein [Source:UniProtKB/TrEMBL
CADAFUAG00000086	40.6491	-1.08115	0.440793	-2.45274	0.0141774	0.0302825	Itra	147	CADAFUAG00000086	AFUA_3G03680	Afu3G03680
CADAFUAG00000086	40.6491	-1.47116	0.377227	-3.89994	9.62172e-05	0.00041078	Isa	147	CADAFUAG00000086	AFUA_3G03680	Afu3G03680
CADAFUAG00000087	125.937	0.391308	0.272271	1.4372	0.15066	0.234678	Itra	147	CADAFUAG00000087	AFUA_3G01790	Afu3G01790	Isoflavone reductase family protein [Source:UniProtKB/TrEMBL
CADAFUAG00000087	125.937	0.868089	0.218878	3.96609	7.30607e-05	0.000318363	Isa	147	CADAFUAG00000087	AFUA_3G01790	Afu3G01790	Isoflavone reductase family protein [Source:UniProtKB/TrEMBL
CADAFUAG00000088	939.899	0.521499	0.137939	3.78066	0.000156411	0.000504503	Itra	147	CADAFUAG00000088	AFUA_3G00200	Afu3G00200	Hexose transporter protein [Source:UniProtKB/TrEMBL
CADAFUAG00000088	939.899	-2.28372	0.132135	-17.2832	6.29091e-67	9.50766e-65	Isa	147	CADAFUAG00000088	AFUA_3G00200	Afu3G00200	Hexose transporter protein [Source:UniProtKB/TrEMBL
CADAFUAG00000089	116.583	-0.151648	0.271295	-0.558979	0.576176	0.677854	Itra	147	CADAFUAG00000089	AFUA_3G01940	Afu3G01940	MFS multidrug transporter; putative [Source:UniProtKB/TrEMBL
CADAFUAG00000089	116.583	0.564388	0.222242	2.53952	0.0111005	0.0300835	Isa	147	CADAFUAG00000089	AFUA_3G01940	Afu3G01940	MFS multidrug transporter; putative [Source:UniProtKB/TrEMBL
CADAFUAG00000090	49.6072	-0.187302	0.379939	-0.492981	0.622026	0.717039	Itra	147	CADAFUAG00000090	AFUA_3G00510	Afu3G00510	GPI anchored cell wall protein; putative [Source:UniProtKB/TrEMBL
CADAFUAG00000090	49.6072	-0.21603	0.333008	-0.648722	0.516518	0.665784	Isa	147	CADAFUAG00000090	AFUA_3G00510	Afu3G00510	GPI anchored cell wall protein; putative [Source:UniProtKB/TrEMBL
CADAFUAG00000091	688.967	-2.68816	0.165128	-16.2793	1.38509e-59	7.73767e-58	Itra	147	CADAFUAG00000091	AFUA_3G03420	Afu3G03420	Nonribosomal peptide synthetase 4 [Source:UniProtKB/Swiss-Prot
CADAFUAG00000091	688.967	-2.78935	0.141023	-19.7794	4.47672e-87	1.44982e-84	Isa	147	CADAFUAG00000091	AFUA_3G03420	Afu3G03420	Nonribosomal peptide synthetase 4 [Source:UniProtKB/Swiss-Prot
CADAFUAG00000092	34.1892	1.86473	0.540611	3.4493	0.000562043	0.00164688	Itra	147	CADAFUAG00000092	AFUA_3G01530	Afu3G01530	Phosphatidylglycerol specific phospholipase; putative [Source:UniProtKB/TrEMBL
CADAFUAG00000092	34.1892	0.771854	0.466919	1.65308	0.0983145	0.191724	Isa	147	CADAFUAG00000092	AFUA_3G01530	Afu3G01530	Phosphatidylglycerol specific phospholipase; putative [Source:UniProtKB/TrEMBL
CADAFUAG00000093	0	NA	NA	NA	NA	NA	Itra	147	CADAFUAG00000093	AFUA_3G04100	Afu3G04100	Putative uncharacterized protein [Source:UniProtKB/TrEMBL
CADAFUAG00000093	0	NA	NA	NA	NA	NA	Isa	147	CADAFUAG00000093	AFUA_3G04100	Afu3G04100	Putative uncharacterized protein [Source:UniProtKB/TrEMBL
CADAFUAG00000094	6.41759	-1.69449	1.37713	-1.23046	0.218526	0.31907	Itra	147	CADAFUAG00000094	AFUA_3G02890	Afu3G02890	MFS sugar transporter; putative [Source:UniProtKB/TrEMBL
CADAFUAG00000094	6.41759	-0.398116	0.900759	-0.441978	0.658505	0.779954	Isa	147	CADAFUAG00000094	AFUA_3G02890	Afu3G02890	MFS sugar transporter; putative [Source:UniProtKB/TrEMBL
CADAFUAG00000095	0.101284	0	4.99746	0	1	NA	Itra	147	CADAFUAG00000095	AFUA_3G02620	Afu3G02620	Phenol hydroxylase; putative [Source:UniProtKB/TrEMBL
CADAFUAG00000095	0.101284	1.91599	4.96063	0.38624	0.699319	NA	Isa	147	CADAFUAG00000095	AFUA_3G02620	Afu3G02620	Phenol hydroxylase; putative [Source:UniProtKB/TrEMBL
CADAFUAG00000096	46.1028	-3.70539	0.802562	-4.61695	3.89424e-06	1.59227e-05	Itra	147	CADAFUAG00000096	AFUA_3G02800	Afu3G02800	Lipase/esterase; putative [Source:UniProtKB/TrEMBL
CADAFUAG00000096	46.1028	-0.80121	0.327498	-2.44645	0.0144269	0.037854	Isa	147	CADAFUAG00000096	AFUA_3G02800	Afu3G02800	Lipase/esterase; putative [Source:UniProtKB/TrEMBL
CADAFUAG00000097	48.2987	0.467605	0.380983	1.22737	0.219685	0.320517	Itra	147	CADAFUAG00000097	AFUA_3G02220	Afu3G02220	DUF427 domain protein [Source:UniProtKB/TrEMBL
CADAFUAG00000097	48.2987	0.271268	0.327494	0.828313	0.407493	0.56735	Isa	147	CADAFUAG00000097	AFUA_3G02220	Afu3G02220	DUF427 domain protein [Source:UniProtKB/TrEMBL
CADAFUAG00000098	17.6083	4.10347	0.829102	4.9493	7.44826e-07	3.32163e-06	Itra	147	CADAFUAG00000098	AFUA_3G01450	Afu3G01450	3-methyl-2-oxobutanoate dehydrogenase; putative [Source:UniProtKB/TrEMBL
CADAFUAG00000098	17.6083	1.5598	0.720718	2.16423	0.0304465	0.0724073	Isa	147	CADAFUAG00000098	AFUA_3G01450	Afu3G01450	3-methyl-2-oxobutanoate dehydrogenase; putative [Source:UniProtKB/TrEMBL
CADAFUAG00000099	16.9539	-0.898394	0.807521	-1.11253	0.265909	0.374246	Itra	147	CADAFUAG00000099	AFUA_3G01210	Afu3G01210	ThiJ/PfpI family protein [Source:UniProtKB/TrEMBL
CADAFUAG00000099	16.9539	0.632863	0.557078	1.13604	0.25594	0.403559	Isa	147	CADAFUAG00000099	AFUA_3G01210	Afu3G01210	ThiJ/PfpI family protein [Source:UniProtKB/TrEMBL
CADAFUAG00000100	2.04814	0.940019	2.41304	0.389557	0.696864	0.776223	Itra	147	CADAFUAG00000100	AFUA_3G02710	Afu3G02710	Zinc-binding oxidoreductase; putative [Source:UniProtKB/TrEMBL
CADAFUAG00000100	2.04814	1.22539	1.73307	0.707062	0.479528	NA	Isa	147	CADAFUAG00000100	AFUA_3G02710	Afu3G02710	Zinc-binding oxidoreductase; putative [Source:UniProtKB/TrEMBL
CADAFUAG00000101	0.779749	-1.47359	2.98083	-0.494355	0.621055	0.716262	Itra	147	CADAFUAG00000101	AFUA_3G03200	Afu3G03200	Cysteine hydrolase family protein [Source:UniProtKB/TrEMBL
CADAFUAG00000101	0.779749	1.36036	2.67134	0.509241	0.610583	NA	Isa	147	CADAFUAG00000101	AFUA_3G03200	Afu3G03200	Cysteine hydrolase family protein [Source:UniProtKB/TrEMBL
CADAFUAG00000102	28.6525	-0.34464	0.536938	-0.64186	0.520964	0.627509	Itra	147	CADAFUAG00000102	AFUA_3G02740	Afu3G02740	Calcium/calmodulin dependent protein kinase; putative [Source:UniProtKB/TrEMBL
CADAFUAG00000102	28.6525	-0.194188	0.432411	-0.449083	0.653372	0.776104	Isa	147	CADAFUAG00000102	AFUA_3G02740	Afu3G02740	Calcium/calmodulin dependent protein kinase; putative [Source:UniProtKB/TrEMBL
CADAFUAG00000103	596.394	0.275968	0.147812	1.86703	0.0618976	0.110547	Itra	147	CADAFUAG00000103	AFUA_3G04230	Afu3G04230	Transcription initiation factor IIF subunit alpha; putative [Source:UniProtKB/TrEMBL
CADAFUAG00000103	596.394	-0.0214166	0.132145	-0.16207	0.871251	0.926881	Isa	147	CADAFUAG00000103	AFUA_3G04230	Afu3G04230	Transcription initiation factor IIF subunit alpha; putative [Source:UniProtKB/TrEMBL
CADAFUAG00000104	2675.17	1.82687	0.134897	13.5427	8.75262e-42	2.82026e-40	Itra	147	CADAFUAG00000104	AFUA_3G03350	Afu3G03350	Nonribosomal peptide synthetase 3 [Source:UniProtKB/Swiss-Prot
CADAFUAG00000104	2675.17	-0.565663	0.133837	-4.2265	2.37349e-05	0.00011304	Isa	147	CADAFUAG00000104	AFUA_3G03350	Afu3G03350	Nonribosomal peptide synthetase 3 [Source:UniProtKB/Swiss-Prot
CADAFUAG00000105	5152.67	-0.25394	0.128357	-1.97839	0.0478848	0.0888697	Itra	147	CADAFUAG00000105	AFUA_3G00180	Afu3G00180	Short chain dehydrogenase (AtsC); putative [Source:UniProtKB/TrEMBL
CADAFUAG00000105	5152.67	-1.71371	0.126917	-13.5027	1.50846e-41	8.54921e-40	Isa	147	CADAFUAG00000105	AFUA_3G00180	Afu3G00180	Short chain dehydrogenase (AtsC); putative [Source:UniProtKB/TrEMBL
CADAFUAG00000106	64.3707	-0.689371	0.356327	-1.93466	0.0530321	0.0970114	Itra	147	CADAFUAG00000106	AFUA_3G02370	Afu3G02370	Short-chain dehydrogenase/reductase; putative [Source:UniProtKB/TrEMBL
CADAFUAG00000106	64.3707	-0.488497	0.304899	-1.60216	0.10912	0.208624	Isa	147	CADAFUAG00000106	AFUA_3G02370	Afu3G02370	Short-chain dehydrogenase/reductase; putative [Source:UniProtKB/TrEMBL
CADAFUAG00000107	61.6717	1.3875	0.392132	3.53836	0.00040262	0.00121017	Itra	147	CADAFUAG00000107	AFUA_3G02090	Afu3G02090	Probable exo-1;4-beta-xylosidase bxlB [Source:UniProtKB/Swiss-Prot
CADAFUAG00000107	61.6717	1.77425	0.338484	5.24174	1.5907e-07	1.02229e-06	Isa	147	CADAFUAG00000107	AFUA_3G02090	Afu3G02090	Probable exo-1;4-beta-xylosidase bxlB [Source:UniProtKB/Swiss-Prot
CADAFUAG00000108	34.9637	-3.1152	0.57841	-5.38581	7.21194e-08	3.65475e-07	Itra	147	CADAFUAG00000108	AFUA_3G03500	Afu3G03500	MFS multidrug transporter; putative [Source:UniProtKB/TrEMBL
CADAFUAG00000108	34.9637	-2.06696	0.496194	-4.16563	3.105e-05	0.000144836	Isa	147	CADAFUAG00000108	AFUA_3G03500	Afu3G03500	MFS multidrug transporter; putative [Source:UniProtKB/TrEMBL
CADAFUAG00000109	235.682	-0.0310882	0.236915	-0.131221	0.895601	0.930183	Itra	147	CADAFUAG00000109	AFUA_3G00230	Afu3G00230	Beta-glucosidase; putative [Source:UniProtKB/TrEMBL
CADAFUAG00000109	235.682	0.798659	0.185432	4.30701	1.65473e-05	8.10646e-05	Isa	147	CADAFUAG00000109	AFUA_3G00230	Afu3G00230	Beta-glucosidase; putative [Source:UniProtKB/TrEMBL
CADAFUAG00000110	690.358	0.586475	0.136669	4.29122	1.77696e-05	6.6388e-05	Itra	147	CADAFUAG00000110	AFUA_3G00150	Afu3G00150	Short-chain dehydrogenase/oxidoreductase; putative [Source:UniProtKB/TrEMBL
CADAFUAG00000110	690.358	0.396355	0.118462	3.34584	0.000820347	0.00296253	Isa	147	CADAFUAG00000110	AFUA_3G00150	Afu3G00150	Short-chain dehydrogenase/oxidoreductase; putative [Source:UniProtKB/TrEMBL
CADAFUAG00000111	59.4357	0.936241	0.372058	2.51638	0.0118566	0.0257982	Itra	147	CADAFUAG00000111	AFUA_3G03590	Afu3G03590	F-box and ankyrin domain protein [Source:UniProtKB/TrEMBL
CADAFUAG00000111	59.4357	-0.797887	0.33391	-2.38952	0.0168702	0.0434847	Isa	147	CADAFUAG00000111	AFUA_3G03590	Afu3G03590	F-box and ankyrin domain protein [Source:UniProtKB/TrEMBL
CADAFUAG00000112	13.3085	3.99704	0.965187	4.14121	3.45479e-05	0.000123548	Itra	147	CADAFUAG00000112	AFUA_3G03530	Afu3G03530	Nitroreductase family protein [Source:UniProtKB/TrEMBL
CADAFUAG00000112	13.3085	-0.291381	0.708912	-0.411026	0.681054	0.798113	Isa	147	CADAFUAG00000112	AFUA_3G03530	Afu3G03530	Nitroreductase family protein [Source:UniProtKB/TrEMBL
CADAFUAG00000113	24.4143	0.571801	0.581332	0.983604	0.32531	0.440008	Itra	147	CADAFUAG00000113	AFUA_3G02685	Afu3G02685	Putative uncharacterized protein [Source:UniProtKB/TrEMBL
CADAFUAG00000113	24.4143	-0.393447	0.460064	-0.855201	0.39244	0.552156	Isa	147	CADAFUAG00000113	AFUA_3G02685	Afu3G02685	Putative uncharacterized protein [Source:UniProtKB/TrEMBL
CADAFUAG00000114	620.887	0.556127	0.149689	3.71521	0.000203037	0.00064346	Itra	147	CADAFUAG00000114	AFUA_3G00820	Afu3G00820	Putative exported protein [Source:UniProtKB/TrEMBL
CADAFUAG00000114	620.887	-0.59036	0.144335	-4.09021	4.30991e-05	0.000196196	Isa	147	CADAFUAG00000114	AFUA_3G00820	Afu3G00820	Putative exported protein [Source:UniProtKB/TrEMBL
CADAFUAG00000115	58.8706	-0.488036	0.343222	-1.42192	0.155048	0.240402	Itra	147	CADAFUAG00000115	AFUA_3G03270	Afu3G03270	Isochorismatase family hydrolase; putative [Source:UniProtKB/TrEMBL
CADAFUAG00000115	58.8706	-0.336876	0.315583	-1.06747	0.285758	0.438902	Isa	147	CADAFUAG00000115	AFUA_3G03270	Afu3G03270	Isochorismatase family hydrolase; putative [Source:UniProtKB/TrEMBL
CADAFUAG00000116	79.6595	0.23177	0.306107	0.757152	0.448959	0.563871	Itra	147	CADAFUAG00000116	AFUA_3G01320	Afu3G01320	Homocysteine S-methyltransferase; putative [Source:UniProtKB/TrEMBL
CADAFUAG00000116	79.6595	0.160187	0.263164	0.608699	0.542724	0.687926	Isa	147	CADAFUAG00000116	AFUA_3G01320	Afu3G01320	Homocysteine S-methyltransferase; putative [Source:UniProtKB/TrEMBL
CADAFUAG00000117	7.58516	-1.74081	1.01338	-1.71783	0.0858273	0.146236	Itra	147	CADAFUAG00000117	AFUA_3G02770	Afu3G02770	FAD binding domain protein [Source:UniProtKB/TrEMBL
CADAFUAG00000117	7.58516	0.318972	0.842407	0.378644	0.704952	0.816204	Isa	147	CADAFUAG00000117	AFUA_3G02770	Afu3G02770	FAD binding domain protein [Source:UniProtKB/TrEMBL
CADAFUAG00000118	314.888	0.819779	0.185932	4.40904	1.0383e-05	4.01418e-05	Itra	147	CADAFUAG00000118	AFUA_3G00490	Afu3G00490	C6 finger domain protein; putative [Source:UniProtKB/TrEMBL
CADAFUAG00000118	314.888	0.281257	0.157677	1.78375	0.0744636	0.153428	Isa	147	CADAFUAG00000118	AFUA_3G00490	Afu3G00490	C6 finger domain protein; putative [Source:UniProtKB/TrEMBL
CADAFUAG00000119	1866.07	-1.76882	0.134107	-13.1897	1.00638e-39	3.07482e-38	Itra	147	CADAFUAG00000119	AFUA_3G03445	Afu3G03445	Short-chain alcohol dehydrogenase; putative [Source:UniProtKB/TrEMBL
CADAFUAG00000119	1866.07	-1.91059	0.125178	-15.263	1.34914e-52	1.24837e-50	Isa	147	CADAFUAG00000119	AFUA_3G03445	Afu3G03445	Short-chain alcohol dehydrogenase; putative [Source:UniProtKB/TrEMBL
CADAFUAG00000120	41.0694	-2.05255	0.568335	-3.61151	0.000304417	0.000934635	Itra	147	CADAFUAG00000120	AFUA_3G03660	Afu3G03660	Siderophore esterase IroE-like; putative [Source:UniProtKB/TrEMBL
CADAFUAG00000120	41.0694	-2.94016	0.390415	-7.53084	5.04152e-14	6.09553e-13	Isa	147	CADAFUAG00000120	AFUA_3G03660	Afu3G03660	Siderophore esterase IroE-like; putative [Source:UniProtKB/TrEMBL
CADAFUAG00000121	12.7253	1.17141	0.877988	1.3342	0.182139	0.274926	Itra	147	CADAFUAG00000121	AFUA_3G01520	Afu3G01520	MFS multidrug transporter; putative [Source:UniProtKB/TrEMBL
CADAFUAG00000121	12.7253	1.04311	0.608426	1.71444	0.0864488	0.172974	Isa	147	CADAFUAG00000121	AFUA_3G01520	Afu3G01520	MFS multidrug transporter; putative [Source:UniProtKB/TrEMBL
CADAFUAG00000122	312.382	0.184185	0.179461	1.02633	0.304738	0.417484	Itra	147	CADAFUAG00000122	AFUA_3G04120	Afu3G04120	Histone-lysine N-methyltransferase (Bre2); putative [Source:UniProtKB/TrEMBL
CADAFUAG00000122	312.382	0.0835081	0.148695	0.561606	0.574385	0.714692	Isa	147	CADAFUAG00000122	AFUA_3G04120	Afu3G04120	Histone-lysine N-methyltransferase (Bre2); putative [Source:UniProtKB/TrEMBL
CADAFUAG00000123	0.217735	2.06963	4.9579	0.417441	0.676356	NA	Itra	147	CADAFUAG00000123
CADAFUAG00000123	0.217735	1.56744	4.9803	0.314728	0.752968	NA	Isa	147	CADAFUAG00000123
CADAFUAG00000124	9.10078	0.440495	0.861171	0.511507	0.608996	0.706678	Itra	147	CADAFUAG00000124	AFUA_3G02160	Afu3G02160	C6 transcription factor; putative [Source:UniProtKB/TrEMBL
CADAFUAG00000124	9.10078	-0.0487695	0.732828	-0.0665497	0.94694	0.970485	Isa	147	CADAFUAG00000124	AFUA_3G02160	Afu3G02160	C6 transcription factor; putative [Source:UniProtKB/TrEMBL
CADAFUAG00000125	45.6559	0.733118	0.495972	1.47814	0.139369	0.220363	Itra	147	CADAFUAG00000125	AFUA_3G00110	Afu3G00110	Succinate-semialdehyde dehydrogenase; putative [Source:UniProtKB/TrEMBL
CADAFUAG00000125	45.6559	1.60714	0.35133	4.57445	4.77476e-06	2.54094e-05	Isa	147	CADAFUAG00000125	AFUA_3G00110	Afu3G00110	Succinate-semialdehyde dehydrogenase; putative [Source:UniProtKB/TrEMBL
CADAFUAG00000126	32.2484	-1.66011	0.526236	-3.15469	0.00160668	0.00431663	Itra	147	CADAFUAG00000126	AFUA_3G00530	Afu3G00530	ATP/GTP-binding protein; putative [Source:UniProtKB/TrEMBL
CADAFUAG00000126	32.2484	1.09993	0.437829	2.51223	0.0119972	0.032282	Isa	147	CADAFUAG00000126	AFUA_3G00530	Afu3G00530	ATP/GTP-binding protein; putative [Source:UniProtKB/TrEMBL
CADAFUAG00000127	505.897	-0.554286	0.152282	-3.63986	0.000272788	0.000844668	Itra	147	CADAFUAG00000127	AFUA_3G01560	Afu3G01560	Amino acid permease (Can1); putative [Source:UniProtKB/TrEMBL
CADAFUAG00000127	505.897	-0.179356	0.130226	-1.37727	0.168429	0.290972	Isa	147	CADAFUAG00000127	AFUA_3G01560	Afu3G01560	Amino acid permease (Can1); putative [Source:UniProtKB/TrEMBL
CADAFUAG00000128	1342.51	-1.6897	0.125743	-13.4377	3.63761e-41	1.16416e-39	Itra	147	CADAFUAG00000128	AFUA_3G00740	Afu3G00740	2-dehydropantoate 2-reductase [Source:UniProtKB/TrEMBL
CADAFUAG00000128	1342.51	0.241283	0.104108	2.31762	0.0204698	0.0513331	Isa	147	CADAFUAG00000128	AFUA_3G00740	Afu3G00740	2-dehydropantoate 2-reductase [Source:UniProtKB/TrEMBL
CADAFUAG00000129	0.779082	-0.58064	3.15144	-0.184246	0.853821	0.89871	Itra	147	CADAFUAG00000129	AFUA_3G03930	Afu3G03930	Cytochrome P450 monooxygenase; putative [Source:UniProtKB/TrEMBL
CADAFUAG00000129	0.779082	4.67905	2.86888	1.63097	0.102897	NA	Isa	147	CADAFUAG00000129	AFUA_3G03930	Afu3G03930	Cytochrome P450 monooxygenase; putative [Source:UniProtKB/TrEMBL
CADAFUAG00000130	0.0702542	0.813888	4.99746	0.16286	0.870628	NA	Itra	147	CADAFUAG00000130	AFUA_3G03080	Afu3G03080	Endo-1;3(4)-beta-glucanase; putative [Source:UniProtKB/TrEMBL
CADAFUAG00000130	0.0702542	-1.24923	4.99329	-0.250182	0.802446	NA	Isa	147	CADAFUAG00000130	AFUA_3G03080	Afu3G03080	Endo-1;3(4)-beta-glucanase; putative [Source:UniProtKB/TrEMBL
CADAFUAG00000131	1.73914	1.48175	1.97488	0.750298	0.453075	0.567606	Itra	147	CADAFUAG00000131	AFUA_3G01140	Afu3G01140	Putative uncharacterized protein [Source:UniProtKB/TrEMBL
CADAFUAG00000131	1.73914	0.86614	1.9977	0.433569	0.664601	NA	Isa	147	CADAFUAG00000131	AFUA_3G01140	Afu3G01140	Putative uncharacterized protein [Source:UniProtKB/TrEMBL
CADAFUAG00000132	0.654735	2.08734	3.13365	0.666105	0.505344	0.61426	Itra	147	CADAFUAG00000132	AFUA_3G03870	Afu3G03870	Endo-1;4-beta-glucanase; putative [Source:UniProtKB/TrEMBL
CADAFUAG00000132	0.654735	2.61473	2.92006	0.895437	0.370553	NA	Isa	147	CADAFUAG00000132	AFUA_3G03870	Afu3G03870	Endo-1;4-beta-glucanase; putative [Source:UniProtKB/TrEMBL
CADAFUAG00000133	3.45594	-2.02642	1.69849	-1.19308	0.23284	0.335763	Itra	147	CADAFUAG00000133	AFUA_3G01200	Afu3G01200	Integral membrane protein Pth11-like; putative [Source:UniProtKB/TrEMBL
CADAFUAG00000133	3.45594	0.642083	1.20895	0.531109	0.595343	0.732705	Isa	147	CADAFUAG00000133	AFUA_3G01200	Afu3G01200	Integral membrane protein Pth11-like; putative [Source:UniProtKB/TrEMBL
CADAFUAG00000134	1180.75	-0.439563	0.131842	-3.334	0.000856069	0.00242707	Itra	147	CADAFUAG00000134	AFUA_3G04240	Afu3G04240	Lipase/serine esterase; putative [Source:UniProtKB/TrEMBL
CADAFUAG00000134	1180.75	-0.626103	0.121973	-5.13314	2.84955e-07	1.76863e-06	Isa	147	CADAFUAG00000134	AFUA_3G04240	Afu3G04240	Lipase/serine esterase; putative [Source:UniProtKB/TrEMBL
CADAFUAG00000135	1.71395	2.60742	2.15348	1.21079	0.225976	0.327667	Itra	147	CADAFUAG00000135	AFUA_3G01230	Afu3G01230	MFS sugar transporte; putative [Source:UniProtKB/TrEMBL
CADAFUAG00000135	1.71395	-0.0788092	1.68041	-0.0468988	0.962594	NA	Isa	147	CADAFUAG00000135	AFUA_3G01230	Afu3G01230	MFS sugar transporte; putative [Source:UniProtKB/TrEMBL
CADAFUAG00000136	26.2307	-0.1454	0.527261	-0.275764	0.782729	0.845122	Itra	147	CADAFUAG00000136	AFUA_3G03920	Afu3G03920	C6 transcription factor; putative [Source:UniProtKB/TrEMBL
CADAFUAG00000136	26.2307	-0.443328	0.424042	-1.04548	0.295801	0.449753	Isa	147	CADAFUAG00000136	AFUA_3G03920	Afu3G03920	C6 transcription factor; putative [Source:UniProtKB/TrEMBL
CADAFUAG00000137	14.7831	1.95425	0.779065	2.50846	0.0121259	0.0262932	Itra	147	CADAFUAG00000137	AFUA_3G01890	Afu3G01890	MFS multidrug transporter; putative [Source:UniProtKB/TrEMBL
CADAFUAG00000137	14.7831	0.0773003	0.579967	0.133284	0.893969	0.939232	Isa	147	CADAFUAG00000137	AFUA_3G01890	Afu3G01890	MFS multidrug transporter; putative [Source:UniProtKB/TrEMBL
CADAFUAG00000138	41.4452	-0.60566	0.433616	-1.39677	0.162484	0.250287	Itra	147	CADAFUAG00000138	AFUA_3G02500	Afu3G02500	Protein kinase; putative [Source:UniProtKB/TrEMBL
CADAFUAG00000138	41.4452	-0.710411	0.381803	-1.86068	0.0627901	0.133033	Isa	147	CADAFUAG00000138	AFUA_3G02500	Afu3G02500	Protein kinase; putative [Source:UniProtKB/TrEMBL
CADAFUAG00000139	153.133	-1.46209	0.304864	-4.79586	1.61976e-06	6.9258e-06	Itra	147	CADAFUAG00000139	AFUA_3G00380	Afu3G00380	Probable beta-galactosidase E [Source:UniProtKB/Swiss-Prot
CADAFUAG00000139	153.133	-1.01752	0.230341	-4.41746	9.98675e-06	5.06487e-05	Isa	147	CADAFUAG00000139	AFUA_3G00380	Afu3G00380	Probable beta-galactosidase E [Source:UniProtKB/Swiss-Prot
CADAFUAG00000140	166.776	2.46393	0.229538	10.7343	7.02205e-27	1.2485e-25	Itra	147	CADAFUAG00000140	AFUA_3G03315	Afu3G03315	C6 transcription factor; putative [Source:UniProtKB/TrEMBL
CADAFUAG00000140	166.776	-0.391946	0.213451	-1.83624	0.0663228	0.139119	Isa	147	CADAFUAG00000140	AFUA_3G03315	Afu3G03315	C6 transcription factor; putative [Source:UniProtKB/TrEMBL
CADAFUAG00000141	3.2089	0.486812	1.47922	0.3291	0.74208	0.814459	Itra	147	CADAFUAG00000141	AFUA_3G01630	Afu3G01630	RTA1 domain protein; putative [Source:UniProtKB/TrEMBL
CADAFUAG00000141	3.2089	2.7101	1.57709	1.71842	0.08572	0.172047	Isa	147	CADAFUAG00000141	AFUA_3G01630	Afu3G01630	RTA1 domain protein; putative [Source:UniProtKB/TrEMBL
CADAFUAG00000142	57.992	-1.69336	0.37478	-4.51828	6.23445e-06	2.4679e-05	Itra	147	CADAFUAG00000142	AFUA_3G03710	Afu3G03710	D-aminopeptidase; putative [Source:UniProtKB/TrEMBL
CADAFUAG00000142	57.992	-1.04806	0.315178	-3.32528	0.00088329	0.00317002	Isa	147	CADAFUAG00000142	AFUA_3G03710	Afu3G03710	D-aminopeptidase; putative [Source:UniProtKB/TrEMBL
CADAFUAG00000143	96.7403	-0.632637	0.30839	-2.05142	0.0402259	0.0763823	Itra	147	CADAFUAG00000143	AFUA_3G00800	Afu3G00800	Oxidoreductase; 2OG-Fe(II) oxygenase family; putative [Source:UniProtKB/TrEMBL
CADAFUAG00000143	96.7403	0.100389	0.261295	0.384198	0.700832	0.813406	Isa	147	CADAFUAG00000143	AFUA_3G00800	Afu3G00800	Oxidoreductase; 2OG-Fe(II) oxygenase family; putative [Source:UniProtKB/TrEMBL
CADAFUAG00000144	30.7551	0.369203	0.508978	0.725381	0.468218	0.581714	Itra	147	CADAFUAG00000144	AFUA_3G01600	Afu3G01600	Salicylate hydroxylase; putative [Source:UniProtKB/TrEMBL
CADAFUAG00000144	30.7551	0.234956	0.456069	0.515177	0.606429	0.741672	Isa	147	CADAFUAG00000144	AFUA_3G01600	Afu3G01600	Salicylate hydroxylase; putative [Source:UniProtKB/TrEMBL
CADAFUAG00000145	92.7509	1.13833	0.278222	4.09144	4.28711e-05	0.000151647	Itra	147	CADAFUAG00000145	AFUA_3G01970	Afu3G01970	Putative uncharacterized protein [Source:UniProtKB/TrEMBL
CADAFUAG00000145	92.7509	0.548256	0.248715	2.20435	0.0274998	0.0663567	Isa	147	CADAFUAG00000145	AFUA_3G01970	Afu3G01970	Putative uncharacterized protein [Source:UniProtKB/TrEMBL
CADAFUAG00000146	120.694	0.701591	0.276201	2.54015	0.0110806	0.0243679	Itra	147	CADAFUAG00000146	AFUA_3G02940	Afu3G02940	Allergen; putative [Source:UniProtKB/TrEMBL
CADAFUAG00000146	120.694	2.15557	0.221777	9.71954	2.48906e-22	5.33588e-21	Isa	147	CADAFUAG00000146	AFUA_3G02940	Afu3G02940	Allergen; putative [Source:UniProtKB/TrEMBL
CADAFUAG00000147	0.435261	-1.81835	3.98315	-0.456511	0.648023	NA	Itra	147	CADAFUAG00000147	AFUA_3G02540	Afu3G02540	Putative uncharacterized protein [Source:UniProtKB/TrEMBL
CADAFUAG00000147	0.435261	-1.21733	4.12414	-0.295172	0.767863	NA	Isa	147	CADAFUAG00000147	AFUA_3G02540	Afu3G02540	Putative uncharacterized protein [Source:UniProtKB/TrEMBL
CADAFUAG00000148	207.609	-1.79257	0.250129	-7.1666	7.68859e-13	6.1204e-12	Itra	147	CADAFUAG00000148	AFUA_3G01290	Afu3G01290	AMID-like mitochondrial oxidoreductase; putative [Source:UniProtKB/TrEMBL
CADAFUAG00000148	207.609	-1.40962	0.179018	-7.87422	3.4288e-15	4.66853e-14	Isa	147	CADAFUAG00000148	AFUA_3G01290	Afu3G01290	AMID-like mitochondrial oxidoreductase; putative [Source:UniProtKB/TrEMBL
CADAFUAG00000149	4240.14	-2.97391	0.127378	-23.347	1.47667e-120	3.4853e-118	Itra	147	CADAFUAG00000149	AFUA_3G00370	Afu3G00370	Phosphoketolase; putative [Source:UniProtKB/TrEMBL
CADAFUAG00000149	4240.14	-0.903656	0.108754	-8.30915	9.63884e-17	1.47146e-15	Isa	147	CADAFUAG00000149	AFUA_3G00370	Afu3G00370	Phosphoketolase; putative [Source:UniProtKB/TrEMBL
CADAFUAG00000150	0.871231	1.18024	2.80688	0.420481	0.674134	0.75822	Itra	147	CADAFUAG00000150	AFUA_3G00620	Afu3G00620	Zinc-containing alcohol dehydrogenase; putative [Source:UniProtKB/TrEMBL
CADAFUAG00000150	0.871231	1.22019	2.7556	0.442804	0.657908	NA	Isa	147	CADAFUAG00000150	AFUA_3G00620	Afu3G00620	Zinc-containing alcohol dehydrogenase; putative [Source:UniProtKB/TrEMBL
CADAFUAG00000151	182.769	0.678539	0.223835	3.03142	0.00243404	0.0062752	Itra	147	CADAFUAG00000151	AFUA_3G03230	Afu3G03230	BZIP transcription factor; putative [Source:UniProtKB/TrEMBL
CADAFUAG00000151	182.769	1.11363	0.192592	5.78231	7.36835e-09	5.57266e-08	Isa	147	CADAFUAG00000151	AFUA_3G03230	Afu3G03230	BZIP transcription factor; putative [Source:UniProtKB/TrEMBL
CADAFUAG00000152	66.6457	-2.69621	0.425644	-6.33442	2.38241e-10	1.54799e-09	Itra	147	CADAFUAG00000152	AFUA_3G02240	Afu3G02240	Aromatic-L-amino-acid decarboxylase; putative [Source:UniProtKB/TrEMBL
CADAFUAG00000152	66.6457	-0.353619	0.309813	-1.14139	0.253706	0.400942	Isa	147	CADAFUAG00000152	AFUA_3G02240	Afu3G02240	Aromatic-L-amino-acid decarboxylase; putative [Source:UniProtKB/TrEMBL
CADAFUAG00000153	55.405	2.05798	0.378701	5.43433	5.50042e-08	2.82532e-07	Itra	147	CADAFUAG00000153	AFUA_3G01800	Afu3G01800	GPI anchored dioxygenase; putative [Source:UniProtKB/TrEMBL
CADAFUAG00000153	55.405	0.552468	0.316899	1.74336	0.0812713	0.164981	Isa	147	CADAFUAG00000153	AFUA_3G01800	Afu3G01800	GPI anchored dioxygenase; putative [Source:UniProtKB/TrEMBL
CADAFUAG00000154	50.3786	0.914415	0.377208	2.42417	0.0153435	0.032567	Itra	147	CADAFUAG00000154	AFUA_3G00570	Afu3G00570	Putative uncharacterized protein [Source:UniProtKB/TrEMBL
CADAFUAG00000154	50.3786	1.0027	0.353641	2.83537	0.00457729	0.0139145	Isa	147	CADAFUAG00000154	AFUA_3G00570	Afu3G00570	Putative uncharacterized protein [Source:UniProtKB/TrEMBL
CADAFUAG00000155	368.285	-0.297369	0.188902	-1.5742	0.115442	0.188464	Itra	147	CADAFUAG00000155	AFUA_3G00660	Afu3G00660	Putative uncharacterized protein [Source:UniProtKB/TrEMBL
CADAFUAG00000155	368.285	0.471312	0.175779	2.68128	0.00733405	0.0209862	Isa	147	CADAFUAG00000155	AFUA_3G00660	Afu3G00660	Putative uncharacterized protein [Source:UniProtKB/TrEMBL
CADAFUAG00000156	173.198	-0.828587	0.230913	-3.58831	0.000332824	0.0010159	Itra	147	CADAFUAG00000156	AFUA_3G04110	Afu3G04110	rRNA processing protein Bystin; putative [Source:UniProtKB/TrEMBL
CADAFUAG00000156	173.198	-0.404919	0.186198	-2.17468	0.0296545	0.0707649	Isa	147	CADAFUAG00000156	AFUA_3G04110	Afu3G04110	rRNA processing protein Bystin; putative [Source:UniProtKB/TrEMBL
CADAFUAG00000157	63.5019	5.54672	0.594405	9.33154	1.04344e-20	1.42152e-19	Itra	147	CADAFUAG00000157	AFUA_3G03470	Afu3G03470	Putative uncharacterized protein [Source:UniProtKB/TrEMBL
CADAFUAG00000157	63.5019	2.67402	0.550956	4.85341	1.21356e-06	6.97373e-06	Isa	147	CADAFUAG00000157	AFUA_3G03470	Afu3G03470	Putative uncharacterized protein [Source:UniProtKB/TrEMBL
CADAFUAG00000158	25.0973	1.09649	0.553347	1.98156	0.0475283	0.0882429	Itra	147	CADAFUAG00000158	AFUA_3G01640	Afu3G01640	C6 finger domain protein; putative [Source:UniProtKB/TrEMBL
CADAFUAG00000158	25.0973	0.398336	0.472108	0.843739	0.398815	0.558361	Isa	147	CADAFUAG00000158	AFUA_3G01640	Afu3G01640	C6 finger domain protein; putative [Source:UniProtKB/TrEMBL
CADAFUAG00000159	1987.63	2.54474	0.118812	21.4181	9.05784e-102	1.37928e-99	Itra	147	CADAFUAG00000159	AFUA_3G02830	Afu3G02830	Ankyrin repeat protein [Source:UniProtKB/TrEMBL
CADAFUAG00000159	1987.63	0.0872094	0.107957	0.807814	0.419198	0.578846	Isa	147	CADAFUAG00000159	AFUA_3G02830	Afu3G02830	Ankyrin repeat protein [Source:UniProtKB/TrEMBL
CADAFUAG00000160	0.292256	2.07297	4.34177	0.477448	0.633043	NA	Itra	147	CADAFUAG00000160	AFUA_3G02410	Afu3G02410
CADAFUAG00000160	0.292256	-2.22624	4.26715	-0.521716	0.601868	NA	Isa	147	CADAFUAG00000160	AFUA_3G02410	Afu3G02410
CADAFUAG00000161	63.326	0.954318	0.353489	2.69971	0.00693995	0.0161539	Itra	147	CADAFUAG00000161	AFUA_3G02010	Afu3G02010	Cytochrome P450 monooxygenase; putative [Source:UniProtKB/TrEMBL
CADAFUAG00000161	63.326	0.493129	0.310606	1.58764	0.112369	0.213484	Isa	147	CADAFUAG00000161	AFUA_3G02010	Afu3G02010	Cytochrome P450 monooxygenase; putative [Source:UniProtKB/TrEMBL
CADAFUAG00000162	50.0159	2.4896	0.406069	6.13097	8.73421e-10	5.40011e-09	Itra	147	CADAFUAG00000162	AFUA_3G01250	Afu3G01250	Short-chain dehydrogenase/reductase family protein; putative [Source:UniProtKB/TrEMBL
CADAFUAG00000162	50.0159	0.908409	0.339024	2.67948	0.00737361	0.0210861	Isa	147	CADAFUAG00000162	AFUA_3G01250	Afu3G01250	Short-chain dehydrogenase/reductase family protein; putative [Source:UniProtKB/TrEMBL
CADAFUAG00000163	39.4096	0.901427	0.432232	2.08552	0.0370222	0.0709988	Itra	147	CADAFUAG00000163	AFUA_3G02950	Afu3G02950	Short-chain oxidoreductase; putative [Source:UniProtKB/TrEMBL
CADAFUAG00000163	39.4096	-0.239808	0.359411	-0.667225	0.504628	0.655531	Isa	147	CADAFUAG00000163	AFUA_3G02950	Afu3G02950	Short-chain oxidoreductase; putative [Source:UniProtKB/TrEMBL
CADAFUAG00000164	137.103	0.207663	0.230835	0.899617	0.368324	0.484108	Itra	147	CADAFUAG00000164	AFUA_3G02340	Afu3G02340	CBF/NF-Y family transcription factor; putative [Source:UniProtKB/TrEMBL
CADAFUAG00000164	137.103	0.102961	0.212195	0.485219	0.627521	0.757907	Isa	147	CADAFUAG00000164	AFUA_3G02340	Afu3G02340	CBF/NF-Y family transcription factor; putative [Source:UniProtKB/TrEMBL
CADAFUAG00000165	1520.74	1.51194	0.125459	12.0513	1.90986e-33	4.51905e-32	Itra	147	CADAFUAG00000165	AFUA_3G00440	Afu3G00440	F-box domain protein [Source:UniProtKB/TrEMBL
CADAFUAG00000165	1520.74	0.996578	0.118235	8.4288	3.49221e-17	5.48828e-16	Isa	147	CADAFUAG00000165	AFUA_3G00440	Afu3G00440	F-box domain protein [Source:UniProtKB/TrEMBL
CADAFUAG00000166	15574	1.62074	0.11068	14.6435	1.48238e-48	6.08486e-47	Itra	147	CADAFUAG00000166	AFUA_3G03320	Afu3G03320	MFS monocarboxylate transporter; putative [Source:UniProtKB/TrEMBL
CADAFUAG00000166	15574	-1.00843	0.110092	-9.15986	5.19654e-20	9.79672e-19	Isa	147	CADAFUAG00000166	AFUA_3G03320	Afu3G03320	MFS monocarboxylate transporter; putative [Source:UniProtKB/TrEMBL
CADAFUAG00000167	0.878362	0.813946	3.21223	0.25339	0.799967	0.858628	Itra	147	CADAFUAG00000167	AFUA_3G02570	Afu3G02570	Polyketide synthase; putative [Source:UniProtKB/TrEMBL
CADAFUAG00000167	0.878362	-0.268439	2.62465	-0.102276	0.918538	NA	Isa	147	CADAFUAG00000167	AFUA_3G02570	Afu3G02570	Polyketide synthase; putative [Source:UniProtKB/TrEMBL
CADAFUAG00000168	86.6989	1.02363	0.294553	3.4752	0.000510479	0.00150701	Itra	147	CADAFUAG00000168	AFUA_3G01920	Afu3G01920	Acyl-CoA dehydrogenase; putative [Source:UniProtKB/TrEMBL
CADAFUAG00000168	86.6989	-0.350755	0.26952	-1.30141	0.193119	0.324177	Isa	147	CADAFUAG00000168	AFUA_3G01920	Afu3G01920	Acyl-CoA dehydrogenase; putative [Source:UniProtKB/TrEMBL
CADAFUAG00000169	0.622262	-0.579473	3.2422	-0.178728	0.858151	0.901302	Itra	147	CADAFUAG00000169	AFUA_3G02120	Afu3G02120	Short-chain dehydrogenase/reductase family protein; putative [Source:UniProtKB/TrEMBL
CADAFUAG00000169	0.622262	2.60238	2.98608	0.871503	0.383479	NA	Isa	147	CADAFUAG00000169	AFUA_3G02120	Afu3G02120	Short-chain dehydrogenase/reductase family protein; putative [Source:UniProtKB/TrEMBL
CADAFUAG00000170	24.9538	-0.101507	0.509803	-0.199111	0.842176	0.890068	Itra	147	CADAFUAG00000170	AFUA_3G03490	Afu3G03490	O-methyltransferase; putative [Source:UniProtKB/TrEMBL
CADAFUAG00000170	24.9538	-0.233009	0.483801	-0.481621	0.630075	0.759709	Isa	147	CADAFUAG00000170	AFUA_3G03490	Afu3G03490	O-methyltransferase; putative [Source:UniProtKB/TrEMBL
CADAFUAG00000171	121.914	1.89417	0.265819	7.12579	1.03482e-12	8.15506e-12	Itra	147	CADAFUAG00000171	AFUA_3G01080	Afu3G01080	Putative uncharacterized protein [Source:UniProtKB/TrEMBL
CADAFUAG00000171	121.914	1.1104	0.2261	4.91111	9.05613e-07	5.28449e-06	Isa	147	CADAFUAG00000171	AFUA_3G01080	Afu3G01080	Putative uncharacterized protein [Source:UniProtKB/TrEMBL
CADAFUAG00000172	162.703	1.66094	0.225754	7.35731	1.87651e-13	1.57132e-12	Itra	147	CADAFUAG00000172	AFUA_3G00865	Afu3G00865	Putative uncharacterized protein [Source:UniProtKB/TrEMBL
CADAFUAG00000172	162.703	-0.204991	0.217494	-0.942509	0.345932	0.503194	Isa	147	CADAFUAG00000172	AFUA_3G00865	Afu3G00865	Putative uncharacterized protein [Source:UniProtKB/TrEMBL
CADAFUAG00000173	472.349	-1.06361	0.154131	-6.90068	5.17559e-12	3.85049e-11	Itra	147	CADAFUAG00000173	AFUA_3G04040	Afu3G04040	Putative uncharacterized protein [Source:UniProtKB/TrEMBL
CADAFUAG00000173	472.349	-1.55508	0.141988	-10.9522	6.48769e-28	1.9416e-26	Isa	147	CADAFUAG00000173	AFUA_3G04040	Afu3G04040	Putative uncharacterized protein [Source:UniProtKB/TrEMBL
CADAFUAG00000174	0	NA	NA	NA	NA	NA	Itra	147	CADAFUAG00000174	AFUA_3G02640	Afu3G02640	Nucleoside-diphosphate-sugar epimerase family protein [Source:UniProtKB/TrEMBL
CADAFUAG00000174	0	NA	NA	NA	NA	NA	Isa	147	CADAFUAG00000174	AFUA_3G02640	Afu3G02640	Nucleoside-diphosphate-sugar epimerase family protein [Source:UniProtKB/TrEMBL
CADAFUAG00000175	2060.3	0.236866	0.117008	2.02435	0.0429342	0.0806811	Itra	147	CADAFUAG00000175	AFUA_3G00850	Afu3G00850	Putative uncharacterized protein [Source:UniProtKB/TrEMBL
CADAFUAG00000175	2060.3	0.00115256	0.113187	0.0101829	0.991875	0.995829	Isa	147	CADAFUAG00000175	AFUA_3G00850	Afu3G00850	Putative uncharacterized protein [Source:UniProtKB/TrEMBL
CADAFUAG00000176	19.7379	1.64997	0.656326	2.51394	0.0119389	0.0259474	Itra	147	CADAFUAG00000176	AFUA_3G00700	Afu3G00700	Glycosyl hydrolase; putative [Source:UniProtKB/TrEMBL
CADAFUAG00000176	19.7379	0.4816	0.49007	0.982716	0.325747	0.482187	Isa	147	CADAFUAG00000176	AFUA_3G00700	Afu3G00700	Glycosyl hydrolase; putative [Source:UniProtKB/TrEMBL
CADAFUAG00000177	25.1957	-0.674636	0.540737	-1.24762	0.212169	0.311571	Itra	147	CADAFUAG00000177	AFUA_3G02390	Afu3G02390	DNA repair protein Nse1; putative [Source:UniProtKB/TrEMBL
CADAFUAG00000177	25.1957	0.00165358	0.437842	0.00377665	0.996987	0.99786	Isa	147	CADAFUAG00000177	AFUA_3G02390	Afu3G02390	DNA repair protein Nse1; putative [Source:UniProtKB/TrEMBL
CADAFUAG00000178	40.057	4.46836	0.620572	7.20039	6.00398e-13	4.80777e-12	Itra	147	CADAFUAG00000178	AFUA_3G01490	Afu3G01490	Alcohol dehydrogenase; putative [Source:UniProtKB/TrEMBL
CADAFUAG00000178	40.057	2.04098	0.431914	4.72545	2.29611e-06	1.27815e-05	Isa	147	CADAFUAG00000178	AFUA_3G01490	Afu3G01490	Alcohol dehydrogenase; putative [Source:UniProtKB/TrEMBL
CADAFUAG00000179	0.136247	-0.568509	4.98663	-0.114007	0.909233	NA	Itra	147	CADAFUAG00000179	AFUA_3G02860	Afu3G02860	Putative uncharacterized protein [Source:UniProtKB/TrEMBL
CADAFUAG00000179	0.136247	0.216478	4.99724	0.0433195	0.965447	NA	Isa	147	CADAFUAG00000179	AFUA_3G02860	Afu3G02860	Putative uncharacterized protein [Source:UniProtKB/TrEMBL
CADAFUAG00000180	38.8788	-0.132297	0.443962	-0.297992	0.765709	0.831787	Itra	147	CADAFUAG00000180	AFUA_3G01872	Afu3G01872	Putative uncharacterized protein [Source:UniProtKB/TrEMBL
CADAFUAG00000180	38.8788	0.174445	0.357786	0.487568	0.625856	0.756833	Isa	147	CADAFUAG00000180	AFUA_3G01872	Afu3G01872	Putative uncharacterized protein [Source:UniProtKB/TrEMBL
CADAFUAG00000181	13.1808	0.377172	0.691556	0.545396	0.585481	0.685741	Itra	147	CADAFUAG00000181	AFUA_3G01770	Afu3G01770	Putative uncharacterized protein [Source:UniProtKB/TrEMBL
CADAFUAG00000181	13.1808	0.602174	0.618625	0.973407	0.330351	0.486619	Isa	147	CADAFUAG00000181	AFUA_3G01770	Afu3G01770	Putative uncharacterized protein [Source:UniProtKB/TrEMBL
CADAFUAG00000182	3198.65	0.0205572	0.115798	0.177526	0.859096	0.902013	Itra	147	CADAFUAG00000182	AFUA_3G00910	Afu3G00910	Alpha-1;3-glucan synthase Ags1 [Source:UniProtKB/TrEMBL
CADAFUAG00000182	3198.65	-0.585857	0.111281	-5.26465	1.40453e-07	9.10387e-07	Isa	147	CADAFUAG00000182	AFUA_3G00910	Afu3G00910	Alpha-1;3-glucan synthase Ags1 [Source:UniProtKB/TrEMBL
CADAFUAG00000183	66.1188	-1.11921	0.36174	-3.09396	0.00197506	0.00519258	Itra	147	CADAFUAG00000183	AFUA_3G02050	Afu3G02050	Putative uncharacterized protein [Source:UniProtKB/TrEMBL
CADAFUAG00000183	66.1188	-1.20918	0.293402	-4.12124	3.76838e-05	0.000173021	Isa	147	CADAFUAG00000183	AFUA_3G02050	Afu3G02050	Putative uncharacterized protein [Source:UniProtKB/TrEMBL
CADAFUAG00000184	498.821	1.69933	0.15243	11.1482	7.30369e-29	1.38741e-27	Itra	147	CADAFUAG00000184	AFUA_3G01690	Afu3G01690	Sterigmatocystin biosynthesis cytochrome P450 monooxygenase; putative [Source:UniProtKB/TrEMBL
CADAFUAG00000184	498.821	0.736356	0.144564	5.09364	3.51248e-07	2.15648e-06	Isa	147	CADAFUAG00000184	AFUA_3G01690	Afu3G01690	Sterigmatocystin biosynthesis cytochrome P450 monooxygenase; putative [Source:UniProtKB/TrEMBL
CADAFUAG00000185	361.579	0.0305202	0.164909	0.185073	0.853171	0.898371	Itra	147	CADAFUAG00000185	AFUA_3G04300	Afu3G04300	Actin cytoskeleton organization and biogenesis protein; putative [Source:UniProtKB/TrEMBL
CADAFUAG00000185	361.579	-0.133092	0.148057	-0.898923	0.368693	0.526755	Isa	147	CADAFUAG00000185	AFUA_3G04300	Afu3G04300	Actin cytoskeleton organization and biogenesis protein; putative [Source:UniProtKB/TrEMBL
CADAFUAG00000186	852.983	-1.891	0.144471	-13.0891	3.80005e-39	1.14256e-37	Itra	147	CADAFUAG00000186	AFUA_3G02080	Afu3G02080	MFS allantoate transporter; putative [Source:UniProtKB/TrEMBL
CADAFUAG00000186	852.983	-0.876398	0.120259	-7.28758	3.15575e-13	3.57704e-12	Isa	147	CADAFUAG00000186	AFUA_3G02080	Afu3G02080	MFS allantoate transporter; putative [Source:UniProtKB/TrEMBL
CADAFUAG00000187	24.4283	-1.80951	0.705761	-2.56392	0.0103497	0.0229747	Itra	147	CADAFUAG00000187	AFUA_3G02760	Afu3G02760	ABC multidrug transporter; putative [Source:UniProtKB/TrEMBL
CADAFUAG00000187	24.4283	-0.183164	0.471322	-0.388617	0.697559	0.811165	Isa	147	CADAFUAG00000187	AFUA_3G02760	Afu3G02760	ABC multidrug transporter; putative [Source:UniProtKB/TrEMBL
CADAFUAG00000188	225.856	0.523228	0.196867	2.65777	0.00786592	0.0179768	Itra	147	CADAFUAG00000188	AFUA_3G03760	Afu3G03760	Putative uncharacterized protein [Source:UniProtKB/TrEMBL
CADAFUAG00000188	225.856	-0.310265	0.174457	-1.77847	0.0753273	0.154856	Isa	147	CADAFUAG00000188	AFUA_3G03760	Afu3G03760	Putative uncharacterized protein [Source:UniProtKB/TrEMBL
CADAFUAG00000189	292.177	-3.44047	0.252704	-13.6146	3.27912e-42	1.07122e-40	Itra	147	CADAFUAG00000189	AFUA_3G03010	Afu3G03010	Phosphate-repressible Na+/phosphate cotransporter Pho89; putative [Source:UniProtKB/TrEMBL
CADAFUAG00000189	292.177	-4.87451	0.270773	-18.0022	1.87099e-72	3.60982e-70	Isa	147	CADAFUAG00000189	AFUA_3G03010	Afu3G03010	Phosphate-repressible Na+/phosphate cotransporter Pho89; putative [Source:UniProtKB/TrEMBL
CADAFUAG00000190	3490.52	-0.827636	0.10713	-7.72556	1.11367e-14	1.02042e-13	Itra	147	CADAFUAG00000190	AFUA_3G01440	Afu3G01440	DUF1212 domain membrane protein [Source:UniProtKB/TrEMBL
CADAFUAG00000190	3490.52	-0.156765	0.100314	-1.56273	0.118115	0.221616	Isa	147	CADAFUAG00000190	AFUA_3G01440	Afu3G01440	DUF1212 domain membrane protein [Source:UniProtKB/TrEMBL
CADAFUAG00000191	439.384	1.34973	0.165744	8.14343	3.84235e-16	3.89641e-15	Itra	147	CADAFUAG00000191	AFUA_3G03140	Afu3G03140	HET domain protein [Source:UniProtKB/TrEMBL
CADAFUAG00000191	439.384	0.411934	0.138487	2.97453	0.00293439	0.00938261	Isa	147	CADAFUAG00000191	AFUA_3G03140	Afu3G03140	HET domain protein [Source:UniProtKB/TrEMBL
CADAFUAG00000192	0.355151	2.07773	3.79324	0.547745	0.583867	NA	Itra	147	CADAFUAG00000192	AFUA_3G03070	Afu3G03070	MYND domain protein; putative [Source:UniProtKB/TrEMBL
CADAFUAG00000192	0.355151	-0.867871	3.68494	-0.235518	0.813806	NA	Isa	147	CADAFUAG00000192	AFUA_3G03070	Afu3G03070	MYND domain protein; putative [Source:UniProtKB/TrEMBL
CADAFUAG00000193	186.643	1.75979	0.210999	8.34029	7.41061e-17	7.92339e-16	Itra	147	CADAFUAG00000193	AFUA_3G02900	Afu3G02900	Oxidoreductase; short chain dehydrogenase/reductase family [Source:UniProtKB/TrEMBL
CADAFUAG00000193	186.643	-0.112866	0.187586	-0.601676	0.54739	0.692073	Isa	147	CADAFUAG00000193	AFUA_3G02900	Afu3G02900	Oxidoreductase; short chain dehydrogenase/reductase family [Source:UniProtKB/TrEMBL
CADAFUAG00000194	159.772	-1.66493	0.301377	-5.52442	3.30578e-08	1.73677e-07	Itra	147	CADAFUAG00000194	AFUA_3G01110	Afu3G01110	GMP synthase [Source:UniProtKB/Swiss-Prot
CADAFUAG00000194	159.772	-0.600447	0.233312	-2.57358	0.0100652	0.0276915	Isa	147	CADAFUAG00000194	AFUA_3G01110	Afu3G01110	GMP synthase [Source:UniProtKB/Swiss-Prot
CADAFUAG00000195	7.89196	1.66502	0.920584	1.80866	0.070504	0.123402	Itra	147	CADAFUAG00000195	AFUA_3G02040	Afu3G02040	Glycosyl hydrolase; putative [Source:UniProtKB/TrEMBL
CADAFUAG00000195	7.89196	3.18865	1.01276	3.14848	0.00164119	0.0055469	Isa	147	CADAFUAG00000195	AFUA_3G02040	Afu3G02040	Glycosyl hydrolase; putative [Source:UniProtKB/TrEMBL
CADAFUAG00000196	8.65648	0.0890178	0.895346	0.0994227	0.920803	0.946271	Itra	147	CADAFUAG00000196	AFUA_3G02310	Afu3G02310	Pyrroline-5-carboxylate reductase [Source:UniProtKB/TrEMBL
CADAFUAG00000196	8.65648	-1.11027	0.833557	-1.33196	0.182873	0.310912	Isa	147	CADAFUAG00000196	AFUA_3G02310	Afu3G02310	Pyrroline-5-carboxylate reductase [Source:UniProtKB/TrEMBL
CADAFUAG00000197	39.369	0.00649101	0.444292	0.0146098	0.988343	0.992307	Itra	147	CADAFUAG00000197	AFUA_3G00410	Afu3G00410	Putative uncharacterized protein [Source:UniProtKB/TrEMBL
CADAFUAG00000197	39.369	0.446452	0.367082	1.21622	0.223902	0.36347	Isa	147	CADAFUAG00000197	AFUA_3G00410	Afu3G00410	Putative uncharacterized protein [Source:UniProtKB/TrEMBL
CADAFUAG00000198	365.131	0.423449	0.178917	2.36673	0.017946	0.037509	Itra	147	CADAFUAG00000198	AFUA_3G00960	Afu3G00960	Putative uncharacterized protein [Source:UniProtKB/TrEMBL
CADAFUAG00000198	365.131	-1.06686	0.172399	-6.18835	6.07978e-10	5.19618e-09	Isa	147	CADAFUAG00000198	AFUA_3G00960	Afu3G00960	Putative uncharacterized protein [Source:UniProtKB/TrEMBL
CADAFUAG00000199	8.75839	0.599941	0.918733	0.653009	0.51375	0.621437	Itra	147	CADAFUAG00000199	AFUA_3G03990	Afu3G03990	Putative uncharacterized protein [Source:UniProtKB/TrEMBL
CADAFUAG00000199	8.75839	-0.364605	0.7418	-0.491514	0.623063	0.754935	Isa	147	CADAFUAG00000199	AFUA_3G03990	Afu3G03990	Putative uncharacterized protein [Source:UniProtKB/TrEMBL
CADAFUAG00000200	52.6132	-1.25171	0.388512	-3.2218	0.0012739	0.00348908	Itra	147	CADAFUAG00000200	AFUA_3G01100	Afu3G01100	C2H2 finger domain protein; putative [Source:UniProtKB/TrEMBL
CADAFUAG00000200	52.6132	-0.801149	0.33893	-2.36376	0.0180905	0.0461448	Isa	147	CADAFUAG00000200	AFUA_3G01100	Afu3G01100	C2H2 finger domain protein; putative [Source:UniProtKB/TrEMBL
CADAFUAG00000201	274.605	3.12157	0.236429	13.203	8.43311e-40	2.59339e-38	Itra	147	CADAFUAG00000201	AFUA_3G00170	Afu3G00170	Putative uncharacterized protein [Source:UniProtKB/TrEMBL
CADAFUAG00000201	274.605	0.818181	0.202752	4.03537	5.45161e-05	0.000243403	Isa	147	CADAFUAG00000201	AFUA_3G00170	Afu3G00170	Putative uncharacterized protein [Source:UniProtKB/TrEMBL
CADAFUAG00000202	619.969	2.68656	0.154034	17.4413	4.0072e-68	2.91015e-66	Itra	147	CADAFUAG00000202	AFUA_3G01670	Afu3G01670	MFS hexose transporter; putative [Source:UniProtKB/TrEMBL
CADAFUAG00000202	619.969	1.60744	0.135238	11.886	1.39943e-32	5.17962e-31	Isa	147	CADAFUAG00000202	AFUA_3G01670	Afu3G01670	MFS hexose transporter; putative [Source:UniProtKB/TrEMBL
CADAFUAG00000203	0.672088	2.71404	3.31197	0.819462	0.412523	0.528511	Itra	147	CADAFUAG00000203	AFUA_3G03815	Afu3G03815	Integral membrane protein [Source:UniProtKB/TrEMBL
CADAFUAG00000203	0.672088	0.371867	3.36116	0.110636	0.911905	NA	Isa	147	CADAFUAG00000203	AFUA_3G03815	Afu3G03815	Integral membrane protein [Source:UniProtKB/TrEMBL
CADAFUAG00000204	31.6613	-0.383533	0.464428	-0.825819	0.408907	0.525022	Itra	147	CADAFUAG00000204	AFUA_3G03750	Afu3G03750	Putative uncharacterized protein [Source:UniProtKB/TrEMBL
CADAFUAG00000204	31.6613	0.219178	0.424618	0.516176	0.605731	0.74131	Isa	147	CADAFUAG00000204	AFUA_3G03750	Afu3G03750	Putative uncharacterized protein [Source:UniProtKB/TrEMBL
CADAFUAG00000205	139.314	2.89913	0.282631	10.2576	1.09338e-24	1.80465e-23	Itra	147	CADAFUAG00000205	AFUA_3G01820	Afu3G01820	Amino acid permease [Source:UniProtKB/TrEMBL
CADAFUAG00000205	139.314	1.29644	0.21232	6.10604	1.02136e-09	8.47367e-09	Isa	147	CADAFUAG00000205	AFUA_3G01820	Afu3G01820	Amino acid permease [Source:UniProtKB/TrEMBL
CADAFUAG00000206	0.125791	0	4.99746	0	1	NA	Itra	147	CADAFUAG00000206	AFUA_3G02190	Afu3G02190	Putative uncharacterized protein [Source:UniProtKB/TrEMBL
CADAFUAG00000206	0.125791	2.35299	4.92001	0.478248	0.632473	NA	Isa	147	CADAFUAG00000206	AFUA_3G02190	Afu3G02190	Putative uncharacterized protein [Source:UniProtKB/TrEMBL
CADAFUAG00000207	1183.3	-0.0358664	0.127107	-0.282176	0.777809	0.840771	Itra	147	CADAFUAG00000207	AFUA_3G01430	Afu3G01430	Benzodiazepine receptor family protein [Source:UniProtKB/TrEMBL
CADAFUAG00000207	1183.3	0.330905	0.118387	2.79511	0.00518815	0.0154961	Isa	147	CADAFUAG00000207	AFUA_3G01430	Afu3G01430	Benzodiazepine receptor family protein [Source:UniProtKB/TrEMBL
CADAFUAG00000208	14.063	0.858502	0.728915	1.17778	0.238884	0.34317	Itra	147	CADAFUAG00000208	AFUA_3G03210	Afu3G03210	Putative uncharacterized protein [Source:UniProtKB/TrEMBL
CADAFUAG00000208	14.063	2.07863	0.66899	3.10711	0.00188927	0.0063264	Isa	147	CADAFUAG00000208	AFUA_3G03210	Afu3G03210	Putative uncharacterized protein [Source:UniProtKB/TrEMBL
CADAFUAG00000209	5.45671	-1.96921	1.27527	-1.54414	0.122553	0.197816	Itra	147	CADAFUAG00000209	AFUA_3G02720	Afu3G02720	MFS transporter; putative [Source:UniProtKB/TrEMBL
CADAFUAG00000209	5.45671	1.12393	0.978996	1.14804	0.250953	0.397631	Isa	147	CADAFUAG00000209	AFUA_3G02720	Afu3G02720	MFS transporter; putative [Source:UniProtKB/TrEMBL
CADAFUAG00000210	247.207	0.895462	0.194203	4.61096	4.0082e-06	1.63533e-05	Itra	147	CADAFUAG00000210	AFUA_3G02910	Afu3G02910	Dihydroxy-acetone synthase; putative [Source:UniProtKB/TrEMBL
CADAFUAG00000210	247.207	0.0373954	0.160789	0.232574	0.816092	0.89235	Isa	147	CADAFUAG00000210	AFUA_3G02910	Afu3G02910	Dihydroxy-acetone synthase; putative [Source:UniProtKB/TrEMBL
CADAFUAG00000211	33.7872	0.551809	0.465523	1.18535	0.235878	0.339677	Itra	147	CADAFUAG00000211	AFUA_3G04000	Afu3G04000	MFS transporter; putative [Source:UniProtKB/TrEMBL
CADAFUAG00000211	33.7872	0.592569	0.373835	1.58511	0.112941	0.214347	Isa	147	CADAFUAG00000211	AFUA_3G04000	Afu3G04000	MFS transporter; putative [Source:UniProtKB/TrEMBL
CADAFUAG00000212	3922.61	-0.897815	0.100087	-8.97035	2.95562e-19	3.6959e-18	Itra	147	CADAFUAG00000212	AFUA_3G00840	Afu3G00840	FAD-dependent oxygenase; putative [Source:UniProtKB/TrEMBL
CADAFUAG00000212	3922.61	-0.42753	0.0929969	-4.59725	4.28102e-06	2.29163e-05	Isa	147	CADAFUAG00000212	AFUA_3G00840	Afu3G00840	FAD-dependent oxygenase; putative [Source:UniProtKB/TrEMBL
CADAFUAG00000213	0.53261	-1.45583	3.50764	-0.415046	0.678108	NA	Itra	147	CADAFUAG00000213	AFUA_3G03150	Afu3G03150	Putative uncharacterized protein [Source:UniProtKB/TrEMBL
CADAFUAG00000213	0.53261	-0.0278162	3.37288	-0.00824702	0.99342	NA	Isa	147	CADAFUAG00000213	AFUA_3G03150	Afu3G03150	Putative uncharacterized protein [Source:UniProtKB/TrEMBL
CADAFUAG00000214	136.398	-0.0897148	0.255465	-0.351182	0.725451	0.800396	Itra	147	CADAFUAG00000214	AFUA_3G03380	Afu3G03380	Sugar O-acetyltransferase; putative [Source:UniProtKB/TrEMBL
CADAFUAG00000214	136.398	0.624517	0.221974	2.81347	0.00490097	0.0147599	Isa	147	CADAFUAG00000214	AFUA_3G03380	Afu3G03380	Sugar O-acetyltransferase; putative [Source:UniProtKB/TrEMBL
CADAFUAG00000215	31.3703	1.77488	0.468139	3.79135	0.00014983	0.000484433	Itra	147	CADAFUAG00000215	AFUA_3G02450	Afu3G02450	Putative uncharacterized protein [Source:UniProtKB/TrEMBL
CADAFUAG00000215	31.3703	-0.817123	0.4323	-1.89018	0.0587344	0.125691	Isa	147	CADAFUAG00000215	AFUA_3G02450	Afu3G02450	Putative uncharacterized protein [Source:UniProtKB/TrEMBL
CADAFUAG00000216	29.7088	1.11618	0.499608	2.23412	0.025475	0.0511364	Itra	147	CADAFUAG00000216	AFUA_3G01060	Afu3G01060	Putative uncharacterized protein [Source:UniProtKB/TrEMBL
CADAFUAG00000216	29.7088	0.21519	0.441523	0.487382	0.625988	0.756833	Isa	147	CADAFUAG00000216	AFUA_3G01060	Afu3G01060	Putative uncharacterized protein [Source:UniProtKB/TrEMBL
CADAFUAG00000217	160.263	-0.433084	0.239782	-1.80616	0.070893	0.124013	Itra	147	CADAFUAG00000217	AFUA_3G01190	Afu3G01190	Serine/threonine protein kinase; putative [Source:UniProtKB/TrEMBL
CADAFUAG00000217	160.263	0.0597872	0.201203	0.297149	0.766353	0.858921	Isa	147	CADAFUAG00000217	AFUA_3G01190	Afu3G01190	Serine/threonine protein kinase; putative [Source:UniProtKB/TrEMBL
CADAFUAG00000218	5.87537	-0.0136265	1.12172	-0.0121479	0.990308	0.993098	Itra	147	CADAFUAG00000218	AFUA_3G03000	Afu3G03000	Phosphatidylethanolamine-binding protein; putative [Source:UniProtKB/TrEMBL
CADAFUAG00000218	5.87537	0.161871	0.904539	0.178954	0.857974	0.918298	Isa	147	CADAFUAG00000218	AFUA_3G03000	Afu3G03000	Phosphatidylethanolamine-binding protein; putative [Source:UniProtKB/TrEMBL
CADAFUAG00000219	6358.24	0.436491	0.125579	3.47583	0.000509278	0.00150441	Itra	147	CADAFUAG00000219	AFUA_3G03370	Afu3G03370	Cell surface protein; putative [Source:UniProtKB/TrEMBL
CADAFUAG00000219	6358.24	-0.5495	0.123402	-4.45291	8.47134e-06	4.33022e-05	Isa	147	CADAFUAG00000219	AFUA_3G03370	Afu3G03370	Cell surface protein; putative [Source:UniProtKB/TrEMBL
CADAFUAG00000220	9.78194	-1.69354	0.90432	-1.87272	0.0611073	0.109409	Itra	147	CADAFUAG00000220	AFUA_3G03970	Afu3G03970	Cytochrome b5 reductase; putative [Source:UniProtKB/TrEMBL
CADAFUAG00000220	9.78194	-1.79703	0.786962	-2.2835	0.0224008	0.0555608	Isa	147	CADAFUAG00000220	AFUA_3G03970	Afu3G03970	Cytochrome b5 reductase; putative [Source:UniProtKB/TrEMBL
CADAFUAG00000221	5.30761	-0.364593	1.11597	-0.326706	0.74389	0.815971	Itra	147	CADAFUAG00000221	AFUA_3G02300	Afu3G02300	Proline oxidase Put1; putative [Source:UniProtKB/TrEMBL
CADAFUAG00000221	5.30761	0.0717337	1.0283	0.0697595	0.944385	0.969071	Isa	147	CADAFUAG00000221	AFUA_3G02300	Afu3G02300	Proline oxidase Put1; putative [Source:UniProtKB/TrEMBL
CADAFUAG00000222	8552.75	1.24361	0.102448	12.139	6.56619e-34	1.58546e-32	Itra	147	CADAFUAG00000222	AFUA_3G03580	Afu3G03580	Transferase family protein [Source:UniProtKB/TrEMBL
CADAFUAG00000222	8552.75	-1.36714	0.10063	-13.5858	4.85921e-42	2.82457e-40	Isa	147	CADAFUAG00000222	AFUA_3G03580	Afu3G03580	Transferase family protein [Source:UniProtKB/TrEMBL
CADAFUAG00000223	106.67	1.17861	0.279493	4.21695	2.47631e-05	9.04404e-05	Itra	147	CADAFUAG00000223	AFUA_3G01980	Afu3G01980	Chromatin structure remodeling complex protein RSC3; putative [Source:UniProtKB/TrEMBL
CADAFUAG00000223	106.67	0.33675	0.227728	1.47874	0.13921	0.251917	Isa	147	CADAFUAG00000223	AFUA_3G01980	Afu3G01980	Chromatin structure remodeling complex protein RSC3; putative [Source:UniProtKB/TrEMBL
CADAFUAG00000224	11.2925	1.07077	0.880682	1.21584	0.224045	0.325467	Itra	147	CADAFUAG00000224	AFUA_3G02460	Afu3G02460	Serine protein kinase; putative [Source:UniProtKB/TrEMBL
CADAFUAG00000224	11.2925	0.090937	0.623915	0.145752	0.884117	0.934841	Isa	147	CADAFUAG00000224	AFUA_3G02460	Afu3G02460	Serine protein kinase; putative [Source:UniProtKB/TrEMBL
CADAFUAG00000225	25.976	-2.18194	0.720536	-3.02821	0.00246004	0.00633531	Itra	147	CADAFUAG00000225	AFUA_3G02750	Afu3G02750	C6 transcription factor; putative [Source:UniProtKB/TrEMBL
CADAFUAG00000225	25.976	-0.0130306	0.447441	-0.0291225	0.976767	0.986229	Isa	147	CADAFUAG00000225	AFUA_3G02750	Afu3G02750	C6 transcription factor; putative [Source:UniProtKB/TrEMBL
CADAFUAG00000226	1237.26	-1.4438	0.135508	-10.6547	1.65771e-26	2.91986e-25	Itra	147	CADAFUAG00000226	AFUA_3G03430	Afu3G03430	ABC multidrug transporter SitT [Source:UniProtKB/TrEMBL
CADAFUAG00000226	1237.26	-1.60743	0.127017	-12.6552	1.04764e-36	4.61163e-35	Isa	147	CADAFUAG00000226	AFUA_3G03430	Afu3G03430	ABC multidrug transporter SitT [Source:UniProtKB/TrEMBL
CADAFUAG00000227	7.30182	2.35187	1.16223	2.02358	0.0430133	0.0807815	Itra	147	CADAFUAG00000227	AFUA_3G00940	Afu3G00940	Putative uncharacterized protein [Source:UniProtKB/TrEMBL
CADAFUAG00000227	7.30182	0.627798	0.878281	0.714804	0.47473	0.629181	Isa	147	CADAFUAG00000227	AFUA_3G00940	Afu3G00940	Putative uncharacterized protein [Source:UniProtKB/TrEMBL
CADAFUAG00000228	32.4848	0.263424	0.491689	0.535753	0.592129	0.691098	Itra	147	CADAFUAG00000228	AFUA_3G02020	Afu3G02020
CADAFUAG00000228	32.4848	0.0670512	0.426171	0.157334	0.874982	0.929296	Isa	147	CADAFUAG00000228	AFUA_3G02020	Afu3G02020
CADAFUAG00000229	38.1736	-0.199525	0.445174	-0.448196	0.654012	0.742748	Itra	147	CADAFUAG00000229	AFUA_3G00520	Afu3G00520	SIR2 family histone deacetylase; putative [Source:UniProtKB/TrEMBL
CADAFUAG00000229	38.1736	0.544196	0.363875	1.49556	0.134769	0.245646	Isa	147	CADAFUAG00000229	AFUA_3G00520	Afu3G00520	SIR2 family histone deacetylase; putative [Source:UniProtKB/TrEMBL
CADAFUAG00000230	118.351	0.383511	0.273104	1.40427	0.16024	0.247517	Itra	147	CADAFUAG00000230	AFUA_3G00450	Afu3G00450	NmrA-like family protein [Source:UniProtKB/TrEMBL
CADAFUAG00000230	118.351	0.0823572	0.23724	0.347148	0.72848	0.831741	Isa	147	CADAFUAG00000230	AFUA_3G00450	Afu3G00450	NmrA-like family protein [Source:UniProtKB/TrEMBL
CADAFUAG00000231	8.91833	0.720376	0.978724	0.736036	0.461709	0.575673	Itra	147	CADAFUAG00000231	AFUA_3G01780	Afu3G01780	Alcohol dehydrogenase; putative [Source:UniProtKB/TrEMBL
CADAFUAG00000231	8.91833	-0.0380372	0.88226	-0.0431134	0.965611	0.981632	Isa	147	CADAFUAG00000231	AFUA_3G01780	Afu3G01780	Alcohol dehydrogenase; putative [Source:UniProtKB/TrEMBL
CADAFUAG00000232	126.22	1.13765	0.262212	4.33868	1.43344e-05	5.44373e-05	Itra	147	CADAFUAG00000232	AFUA_3G00320	Afu3G00320	Endo-1;4-beta-xylanase xynf11a [Source:UniProtKB/Swiss-Prot
CADAFUAG00000232	126.22	1.18728	0.217457	5.45982	4.76621e-08	3.23745e-07	Isa	147	CADAFUAG00000232	AFUA_3G00320	Afu3G00320	Endo-1;4-beta-xylanase xynf11a [Source:UniProtKB/Swiss-Prot
CADAFUAG00000233	133.049	0.506719	0.241945	2.09436	0.0362282	0.0696174	Itra	147	CADAFUAG00000233	AFUA_3G02400	Afu3G02400	UbiE/COQ5 methyltransferase; putative [Source:UniProtKB/TrEMBL
CADAFUAG00000233	133.049	0.343159	0.213413	1.60796	0.107844	0.206619	Isa	147	CADAFUAG00000233	AFUA_3G02400	Afu3G02400	UbiE/COQ5 methyltransferase; putative [Source:UniProtKB/TrEMBL
CADAFUAG00000234	4473.67	1.20496	0.116169	10.3725	3.30881e-25	5.52893e-24	Itra	147	CADAFUAG00000234	AFUA_3G01580	Afu3G01580	GMC oxidoreductase; putative [Source:UniProtKB/TrEMBL
CADAFUAG00000234	4473.67	0.125443	0.111756	1.12247	0.261662	0.410439	Isa	147	CADAFUAG00000234	AFUA_3G01580	Afu3G01580	GMC oxidoreductase; putative [Source:UniProtKB/TrEMBL
CADAFUAG00000235	10.0481	-0.910451	0.797878	-1.14109	0.253833	0.360583	Itra	147	CADAFUAG00000235	AFUA_3G02260	Afu3G02260	Putative uncharacterized protein [Source:UniProtKB/TrEMBL
CADAFUAG00000235	10.0481	0.985892	0.760665	1.29609	0.194944	0.326154	Isa	147	CADAFUAG00000235	AFUA_3G02260	Afu3G02260	Putative uncharacterized protein [Source:UniProtKB/TrEMBL
CADAFUAG00000236	12.0799	-0.708985	0.73594	-0.963373	0.33536	0.450885	Itra	147	CADAFUAG00000236	AFUA_3G00920	Afu3G00920	RTA1 domain protein; putative [Source:UniProtKB/TrEMBL
CADAFUAG00000236	12.0799	-0.187054	0.642801	-0.290998	0.771053	0.862134	Isa	147	CADAFUAG00000236	AFUA_3G00920	Afu3G00920	RTA1 domain protein; putative [Source:UniProtKB/TrEMBL
CADAFUAG00000237	112.9	0.102451	0.265525	0.385842	0.699614	0.778347	Itra	147	CADAFUAG00000237	AFUA_3G02480	Afu3G02480	C6 transcription factor; putative [Source:UniProtKB/TrEMBL
CADAFUAG00000237	112.9	0.0131391	0.227995	0.057629	0.954044	0.974854	Isa	147	CADAFUAG00000237	AFUA_3G02480	Afu3G02480	C6 transcription factor; putative [Source:UniProtKB/TrEMBL
CADAFUAG00000238	35.56	0.525843	0.505391	1.04047	0.298123	0.410527	Itra	147	CADAFUAG00000238	AFUA_3G04050	Afu3G04050	Putative uncharacterized protein [Source:UniProtKB/TrEMBL
CADAFUAG00000238	35.56	0.241884	0.439048	0.550927	0.581683	0.721278	Isa	147	CADAFUAG00000238	AFUA_3G04050	Afu3G04050	Putative uncharacterized protein [Source:UniProtKB/TrEMBL
CADAFUAG00000239	65.9531	1.17088	0.336214	3.48255	0.000496669	0.00146946	Itra	147	CADAFUAG00000239	AFUA_3G02785	Afu3G02785	Putative uncharacterized protein [Source:UniProtKB/TrEMBL
CADAFUAG00000239	65.9531	0.502994	0.304162	1.65371	0.0981874	0.1916	Isa	147	CADAFUAG00000239	AFUA_3G02785	Afu3G02785	Putative uncharacterized protein [Source:UniProtKB/TrEMBL
CADAFUAG00000240	3293.34	0.913576	0.142604	6.40639	1.49007e-10	9.86519e-10	Itra	147	CADAFUAG00000240	AFUA_3G00590	Afu3G00590	Asp-hemolysin [Source:UniProtKB/Swiss-Prot
CADAFUAG00000240	3293.34	-0.656617	0.142574	-4.60544	4.11593e-06	2.20978e-05	Isa	147	CADAFUAG00000240	AFUA_3G00590	Afu3G00590	Asp-hemolysin [Source:UniProtKB/Swiss-Prot
CADAFUAG00000241	10.4908	1.53237	0.871282	1.75876	0.0786191	0.135743	Itra	147	CADAFUAG00000241	AFUA_3G00470	Afu3G00470	Endo-1;4-beta-xylanase [Source:UniProtKB/TrEMBL
CADAFUAG00000241	10.4908	-0.412459	0.672818	-0.613031	0.539856	0.685522	Isa	147	CADAFUAG00000241	AFUA_3G00470	Afu3G00470	Endo-1;4-beta-xylanase [Source:UniProtKB/TrEMBL
CADAFUAG00000242	66.8288	-2.76005	0.46268	-5.96535	2.44104e-09	1.42699e-08	Itra	147	CADAFUAG00000242	AFUA_3G00760	Afu3G00760	GNAT family N-acetyltransferase; putative [Source:UniProtKB/TrEMBL
CADAFUAG00000242	66.8288	0.880499	0.30145	2.92088	0.00349044	0.0109369	Isa	147	CADAFUAG00000242	AFUA_3G00760	Afu3G00760	GNAT family N-acetyltransferase; putative [Source:UniProtKB/TrEMBL
CADAFUAG00000243	1111.44	-0.349609	0.142434	-2.45453	0.0141071	0.0301528	Itra	147	CADAFUAG00000243	AFUA_3G00810	Afu3G00810	Cholestenol delta-isomerase; putative [Source:UniProtKB/TrEMBL
CADAFUAG00000243	1111.44	-2.05351	0.13929	-14.7426	3.43063e-49	2.88046e-47	Isa	147	CADAFUAG00000243	AFUA_3G00810	Afu3G00810	Cholestenol delta-isomerase; putative [Source:UniProtKB/TrEMBL
CADAFUAG00000244	24.1719	2.29519	0.546257	4.20167	2.64951e-05	9.63562e-05	Itra	147	CADAFUAG00000244	AFUA_3G01150	Afu3G01150	GPI anchored cell wall protein; putative [Source:UniProtKB/TrEMBL
CADAFUAG00000244	24.1719	0.120814	0.488863	0.247132	0.804806	0.884305	Isa	147	CADAFUAG00000244	AFUA_3G01150	Afu3G01150	GPI anchored cell wall protein; putative [Source:UniProtKB/TrEMBL
CADAFUAG00000245	216.442	-1.74058	0.215547	-8.07519	6.73705e-16	6.74491e-15	Itra	147	CADAFUAG00000245	AFUA_3G04030	Afu3G04030	Succinyl-CoA:3-ketoacid-coenzyme A transferase [Source:UniProtKB/TrEMBL
CADAFUAG00000245	216.442	-1.66501	0.183401	-9.07854	1.10043e-19	2.03233e-18	Isa	147	CADAFUAG00000245	AFUA_3G04030	Afu3G04030	Succinyl-CoA:3-ketoacid-coenzyme A transferase [Source:UniProtKB/TrEMBL
CADAFUAG00000246	179.41	0.458405	0.252912	1.81251	0.069907	0.122561	Itra	147	CADAFUAG00000246	AFUA_3G00690	Afu3G00690	C6 transcription factor; putative [Source:UniProtKB/TrEMBL
CADAFUAG00000246	179.41	1.66581	0.183763	9.06496	1.24656e-19	2.29285e-18	Isa	147	CADAFUAG00000246	AFUA_3G00690	Afu3G00690	C6 transcription factor; putative [Source:UniProtKB/TrEMBL
CADAFUAG00000247	229.261	-1.43883	0.230957	-6.22983	4.66931e-10	2.97055e-09	Itra	147	CADAFUAG00000247	AFUA_3G01400	Afu3G01400	ABC multidrug transporter; putative [Source:UniProtKB/TrEMBL
CADAFUAG00000247	229.261	0.397663	0.168176	2.36456	0.0180513	0.0460706	Isa	147	CADAFUAG00000247	AFUA_3G01400	Afu3G01400	ABC multidrug transporter; putative [Source:UniProtKB/TrEMBL
CADAFUAG00000248	72.6757	-0.28277	0.37933	-0.745447	0.456002	0.570591	Itra	147	CADAFUAG00000248	AFUA_3G00650	Afu3G00650	Probable leucine aminopeptidase 2 [Source:UniProtKB/Swiss-Prot
CADAFUAG00000248	72.6757	0.373101	0.320011	1.1659	0.243655	0.388784	Isa	147	CADAFUAG00000248	AFUA_3G00650	Afu3G00650	Probable leucine aminopeptidase 2 [Source:UniProtKB/Swiss-Prot
CADAFUAG00000249	69.4804	-1.20161	0.359039	-3.34672	0.000817728	0.00232816	Itra	147	CADAFUAG00000249	AFUA_3G01240	Afu3G01240	Putative uncharacterized protein [Source:UniProtKB/TrEMBL
CADAFUAG00000249	69.4804	-0.921529	0.317227	-2.90495	0.00367309	0.0114459	Isa	147	CADAFUAG00000249	AFUA_3G01240	Afu3G01240	Putative uncharacterized protein [Source:UniProtKB/TrEMBL
CADAFUAG00000250	241.006	-0.619843	0.195219	-3.17511	0.00149779	0.00404597	Itra	147	CADAFUAG00000250	AFUA_3G04250	Afu3G04250	Inositol monophosphatase; putative [Source:UniProtKB/TrEMBL
CADAFUAG00000250	241.006	-0.293243	0.164296	-1.78484	0.0742868	0.153133	Isa	147	CADAFUAG00000250	AFUA_3G04250	Afu3G04250	Inositol monophosphatase; putative [Source:UniProtKB/TrEMBL
CADAFUAG00000251	225.68	0.507103	0.215649	2.35152	0.0186968	0.0387864	Itra	147	CADAFUAG00000251	AFUA_3G03740	Afu3G03740	Protein kinase; putative [Source:UniProtKB/TrEMBL
CADAFUAG00000251	225.68	0.129442	0.190244	0.680402	0.49625	0.647948	Isa	147	CADAFUAG00000251	AFUA_3G03740	Afu3G03740	Protein kinase; putative [Source:UniProtKB/TrEMBL
CADAFUAG00000252	36.1516	0.740621	0.461451	1.60498	0.108498	0.178547	Itra	147	CADAFUAG00000252	AFUA_3G01880	Afu3G01880	Fungal specific transcription factor; putative [Source:UniProtKB/TrEMBL
CADAFUAG00000252	36.1516	0.0957288	0.418344	0.228828	0.819002	0.894062	Isa	147	CADAFUAG00000252	AFUA_3G01880	Afu3G01880	Fungal specific transcription factor; putative [Source:UniProtKB/TrEMBL
CADAFUAG00000253	55.3571	1.5881	0.392164	4.04958	5.13091e-05	0.000179145	Itra	147	CADAFUAG00000253	AFUA_3G01910	Afu3G01910	Probable 1;4-beta-D-glucan cellobiohydrolase C [Source:UniProtKB/Swiss-Prot
CADAFUAG00000253	55.3571	0.434493	0.306898	1.41576	0.156847	0.276119	Isa	147	CADAFUAG00000253	AFUA_3G01910	Afu3G01910	Probable 1;4-beta-D-glucan cellobiohydrolase C [Source:UniProtKB/Swiss-Prot
CADAFUAG00000254	129.538	1.05669	0.261092	4.04718	5.18385e-05	0.000180793	Itra	147	CADAFUAG00000254	AFUA_3G03520	Afu3G03520	Integral membrane protein [Source:UniProtKB/TrEMBL
CADAFUAG00000254	129.538	0.497658	0.223547	2.22619	0.0260015	0.0631953	Isa	147	CADAFUAG00000254	AFUA_3G03520	Afu3G03520	Integral membrane protein [Source:UniProtKB/TrEMBL
CADAFUAG00000255	106.422	2.8852	0.310744	9.2848	1.62006e-20	2.185e-19	Itra	147	CADAFUAG00000255	AFUA_3G03310	Afu3G03310	RTA1 domain protein [Source:UniProtKB/TrEMBL
CADAFUAG00000255	106.422	0.921776	0.26104	3.53117	0.000413729	0.00158366	Isa	147	CADAFUAG00000255	AFUA_3G03310	Afu3G03310	RTA1 domain protein [Source:UniProtKB/TrEMBL
CADAFUAG00000256	0.0628953	0	4.99746	0	1	NA	Itra	147	CADAFUAG00000256	AFUA_3G02560	Afu3G02560	Putative uncharacterized protein [Source:UniProtKB/TrEMBL
CADAFUAG00000256	0.0628953	1.56741	4.9803	0.314723	0.752972	NA	Isa	147	CADAFUAG00000256	AFUA_3G02560	Afu3G02560	Putative uncharacterized protein [Source:UniProtKB/TrEMBL
CADAFUAG00000257	34.1856	-0.285146	0.482452	-0.591036	0.554496	0.657994	Itra	147	CADAFUAG00000257	AFUA_3G00790	Afu3G00790	Methylaspartate ammonia-lyase; putative [Source:UniProtKB/TrEMBL
CADAFUAG00000257	34.1856	0.360502	0.391174	0.921591	0.356742	0.514153	Isa	147	CADAFUAG00000257	AFUA_3G00790	Afu3G00790	Methylaspartate ammonia-lyase; putative [Source:UniProtKB/TrEMBL
CADAFUAG00000258	2.46436	4.72732	1.97364	2.39523	0.0166099	0.0349754	Itra	147	CADAFUAG00000258	AFUA_3G01660	Afu3G01660	Glycosyl hydrolase; family 43; putative [Source:UniProtKB/TrEMBL
CADAFUAG00000258	2.46436	-1.42388	1.54042	-0.924347	0.355306	NA	Isa	147	CADAFUAG00000258	AFUA_3G01660	Afu3G01660	Glycosyl hydrolase; family 43; putative [Source:UniProtKB/TrEMBL
CADAFUAG00000259	0.101284	0	4.99746	0	1	NA	Itra	147	CADAFUAG00000259	AFUA_3G02600	Afu3G02600	Putative uncharacterized protein [Source:UniProtKB/TrEMBL
CADAFUAG00000259	0.101284	1.91599	4.96063	0.38624	0.699319	NA	Isa	147	CADAFUAG00000259	AFUA_3G02600	Afu3G02600	Putative uncharacterized protein [Source:UniProtKB/TrEMBL
CADAFUAG00000260	18.1525	-0.519885	0.639597	-0.812832	0.416314	0.532073	Itra	147	CADAFUAG00000260	AFUA_3G02216	Afu3G02216	Putative uncharacterized protein [Source:UniProtKB/TrEMBL
CADAFUAG00000260	18.1525	-0.0281444	0.518214	-0.0543104	0.956688	0.976063	Isa	147	CADAFUAG00000260	AFUA_3G02216	Afu3G02216	Putative uncharacterized protein [Source:UniProtKB/TrEMBL
CADAFUAG00000261	1.98231	-0.22922	2.11318	-0.108472	0.913622	0.941751	Itra	147	CADAFUAG00000261	AFUA_3G02200	Afu3G02200	Putative uncharacterized protein [Source:UniProtKB/TrEMBL
CADAFUAG00000261	1.98231	1.15659	1.47962	0.78168	0.434402	NA	Isa	147	CADAFUAG00000261	AFUA_3G02200	Afu3G02200	Putative uncharacterized protein [Source:UniProtKB/TrEMBL
CADAFUAG00000262	24.3176	-0.738155	0.570588	-1.29367	0.195778	0.291327	Itra	147	CADAFUAG00000262	AFUA_3G02550	Afu3G02550	Putative uncharacterized protein [Source:UniProtKB/TrEMBL
CADAFUAG00000262	24.3176	0.251036	0.456433	0.549994	0.582323	0.721676	Isa	147	CADAFUAG00000262	AFUA_3G02550	Afu3G02550	Putative uncharacterized protein [Source:UniProtKB/TrEMBL
CADAFUAG00000263	0.5679	-0.580444	3.17081	-0.183059	0.854752	0.899232	Itra	147	CADAFUAG00000263	AFUA_3G03180	Afu3G03180	NAD binding Rossmann fold oxidoreductase; putative [Source:UniProtKB/TrEMBL
CADAFUAG00000263	0.5679	0.155835	2.72896	0.0571041	0.954462	NA	Isa	147	CADAFUAG00000263	AFUA_3G03180	Afu3G03180	NAD binding Rossmann fold oxidoreductase; putative [Source:UniProtKB/TrEMBL
CADAFUAG00000264	83.7133	-0.395638	0.336991	-1.17403	0.240383	0.345164	Itra	147	CADAFUAG00000264	AFUA_3G03900	Afu3G03900	C6 transcription factor; putative [Source:UniProtKB/TrEMBL
CADAFUAG00000264	83.7133	1.19217	0.252535	4.72081	2.34913e-06	1.30606e-05	Isa	147	CADAFUAG00000264	AFUA_3G03900	Afu3G03900	C6 transcription factor; putative [Source:UniProtKB/TrEMBL
CADAFUAG00000265	10.6651	-0.101813	0.801334	-0.127054	0.898898	0.932684	Itra	147	CADAFUAG00000265	AFUA_3G01180	Afu3G01180	Sarcosine oxidase; putative [Source:UniProtKB/TrEMBL
CADAFUAG00000265	10.6651	0.0821365	0.682608	0.120328	0.904224	0.944274	Isa	147	CADAFUAG00000265	AFUA_3G01180	Afu3G01180	Sarcosine oxidase; putative [Source:UniProtKB/TrEMBL
CADAFUAG00000266	258.657	-0.108089	0.189412	-0.570658	0.568231	0.671171	Itra	147	CADAFUAG00000266	AFUA_3G02330	Afu3G02330	Chromatin remodeling complex subunit (Arp9); putative [Source:UniProtKB/TrEMBL
CADAFUAG00000266	258.657	0.103495	0.158158	0.654376	0.51287	0.662116	Isa	147	CADAFUAG00000266	AFUA_3G02330	Afu3G02330	Chromatin remodeling complex subunit (Arp9); putative [Source:UniProtKB/TrEMBL
CADAFUAG00000267	108.083	1.9926	0.28022	7.11086	1.15321e-12	9.06535e-12	Itra	147	CADAFUAG00000267	AFUA_3G03700	Afu3G03700	MFS sugar transporter; putative [Source:UniProtKB/TrEMBL
CADAFUAG00000267	108.083	-1.26664	0.253474	-4.9971	5.81984e-07	3.45156e-06	Isa	147	CADAFUAG00000267	AFUA_3G03700	Afu3G03700	MFS sugar transporter; putative [Source:UniProtKB/TrEMBL
CADAFUAG00000268	40.2477	-2.94165	0.62431	-4.71184	2.45494e-06	1.02735e-05	Itra	147	CADAFUAG00000268	AFUA_3G00765	Afu3G00765	N-acetyltransferase; GNAT family; putative [Source:UniProtKB/TrEMBL
CADAFUAG00000268	40.2477	-0.372492	0.40927	-0.910137	0.36275	0.52056	Isa	147	CADAFUAG00000268	AFUA_3G00765	Afu3G00765	N-acetyltransferase; GNAT family; putative [Source:UniProtKB/TrEMBL
CADAFUAG00000269	93.5534	1.97332	0.315427	6.25604	3.94879e-10	2.52407e-09	Itra	147	CADAFUAG00000269	AFUA_3G02820	Afu3G02820
CADAFUAG00000269	93.5534	-0.292295	0.258701	-1.12986	0.258537	0.406662	Isa	147	CADAFUAG00000269	AFUA_3G02820	Afu3G02820
CADAFUAG00000270	0.600766	1.7674	3.4996	0.50503	0.613538	0.710115	Itra	147	CADAFUAG00000270	AFUA_3G02180	Afu3G02180	AM-toxin synthetase [Source:UniProtKB/TrEMBL
CADAFUAG00000270	0.600766	0.21653	3.6347	0.0595729	0.952496	NA	Isa	147	CADAFUAG00000270	AFUA_3G02180	Afu3G02180	AM-toxin synthetase [Source:UniProtKB/TrEMBL
CADAFUAG00000271	200.698	-1.70501	0.240302	-7.09528	1.29087e-12	1.01054e-11	Itra	147	CADAFUAG00000271	AFUA_3G02250	Afu3G02250	3-beta hydroxysteroid dehydrogenase/isomerase family protein [Source:UniProtKB/TrEMBL
CADAFUAG00000271	200.698	-0.401883	0.179479	-2.23916	0.0251453	0.0613941	Isa	147	CADAFUAG00000271	AFUA_3G02250	Afu3G02250	3-beta hydroxysteroid dehydrogenase/isomerase family protein [Source:UniProtKB/TrEMBL
CADAFUAG00000272	109026	0.835154	0.434973	1.92001	0.0548561	0.0997489	Itra	147	CADAFUAG00000272	AFUA_3G00270	Afu3G00270	Probable glucan endo-1;3-beta-glucosidase eglC [Source:UniProtKB/Swiss-Prot
CADAFUAG00000272	109026	0.846211	0.434944	1.94556	0.0517071	0.113025	Isa	147	CADAFUAG00000272	AFUA_3G00270	Afu3G00270	Probable glucan endo-1;3-beta-glucosidase eglC [Source:UniProtKB/Swiss-Prot
CADAFUAG00000273	24.8277	2.45661	0.580429	4.2324	2.31214e-05	8.48844e-05	Itra	147	CADAFUAG00000273	AFUA_3G00290	Afu3G00290	3-hydroxyacyl-CoA dehydrogenase; putative [Source:UniProtKB/TrEMBL
CADAFUAG00000273	24.8277	0.715934	0.495952	1.44356	0.148864	0.265311	Isa	147	CADAFUAG00000273	AFUA_3G00290	Afu3G00290	3-hydroxyacyl-CoA dehydrogenase; putative [Source:UniProtKB/TrEMBL
CADAFUAG00000274	227.407	-0.345593	0.209611	-1.64874	0.0992009	0.165762	Itra	147	CADAFUAG00000274	AFUA_3G00310	Afu3G00310	Extracellular phytase; putative [Source:UniProtKB/TrEMBL
CADAFUAG00000274	227.407	-0.267225	0.174239	-1.53367	0.125111	0.232005	Isa	147	CADAFUAG00000274	AFUA_3G00310	Afu3G00310	Extracellular phytase; putative [Source:UniProtKB/TrEMBL
CADAFUAG00000275	13.9479	1.44178	0.78587	1.83463	0.0665605	0.117589	Itra	147	CADAFUAG00000275	AFUA_3G00210	Afu3G00210	C6 finger domain protein; putative [Source:UniProtKB/TrEMBL
CADAFUAG00000275	13.9479	-0.450744	0.716596	-0.629006	0.529345	0.676452	Isa	147	CADAFUAG00000275	AFUA_3G00210	Afu3G00210	C6 finger domain protein; putative [Source:UniProtKB/TrEMBL
CADAFUAG00000276	3.832	1.28805	1.32125	0.974871	0.329624	0.445078	Itra	147	CADAFUAG00000276	AFUA_3G02130	Afu3G02130	Oxidoreductase; zinc-binding; putative [Source:UniProtKB/TrEMBL
CADAFUAG00000276	3.832	1.12672	1.11678	1.00891	0.31302	0.468239	Isa	147	CADAFUAG00000276	AFUA_3G02130	Afu3G02130	Oxidoreductase; zinc-binding; putative [Source:UniProtKB/TrEMBL
CADAFUAG00000277	544.4	-3.11235	0.189511	-16.4231	1.30818e-60	7.62378e-59	Itra	147	CADAFUAG00000277	AFUA_3G02253	Afu3G02253	YjgH family protein [Source:UniProtKB/TrEMBL
CADAFUAG00000277	544.4	-0.0396079	0.130778	-0.302863	0.761994	0.856016	Isa	147	CADAFUAG00000277	AFUA_3G02253	Afu3G02253	YjgH family protein [Source:UniProtKB/TrEMBL
CADAFUAG00000278	12.9568	1.78396	0.800488	2.22859	0.025841	0.0517752	Itra	147	CADAFUAG00000278	AFUA_3G02970	Afu3G02970	Aspergillopepsin; putative [Source:UniProtKB/TrEMBL
CADAFUAG00000278	12.9568	0.188789	0.633467	0.298026	0.765684	0.858672	Isa	147	CADAFUAG00000278	AFUA_3G02970	Afu3G02970	Aspergillopepsin; putative [Source:UniProtKB/TrEMBL
CADAFUAG00000279	6.72662	-0.886946	1.12957	-0.785204	0.432334	0.547801	Itra	147	CADAFUAG00000279	AFUA_3G03860	Afu3G03860	3-hydroxyacyl-CoA dehydrogenase; putative [Source:UniProtKB/TrEMBL
CADAFUAG00000279	6.72662	2.86891	0.928839	3.08871	0.00201027	0.00669695	Isa	147	CADAFUAG00000279	AFUA_3G03860	Afu3G03860	3-hydroxyacyl-CoA dehydrogenase; putative [Source:UniProtKB/TrEMBL
CADAFUAG00000280	2764.52	-0.269761	0.109927	-2.45401	0.0141274	0.0301826	Itra	147	CADAFUAG00000280	AFUA_3G02780	Afu3G02780	MFS multidrug transporter; putative [Source:UniProtKB/TrEMBL
CADAFUAG00000280	2764.52	1.48711	0.103971	14.3031	2.09174e-46	1.49353e-44	Isa	147	CADAFUAG00000280	AFUA_3G02780	Afu3G02780	MFS multidrug transporter; putative [Source:UniProtKB/TrEMBL
CADAFUAG00000281	25.5469	0.870272	0.541383	1.6075	0.107945	0.177794	Itra	147	CADAFUAG00000281	AFUA_3G01480	Afu3G01480	Putative uncharacterized protein [Source:UniProtKB/TrEMBL
CADAFUAG00000281	25.5469	0.482749	0.43545	1.10862	0.267594	0.417936	Isa	147	CADAFUAG00000281	AFUA_3G01480	Afu3G01480	Putative uncharacterized protein [Source:UniProtKB/TrEMBL
CADAFUAG00000282	4643.52	0.0123759	0.127593	0.0969955	0.92273	0.947416	Itra	147	CADAFUAG00000282	AFUA_3G02380	Afu3G02380	U2 auxiliary factor small subunit; putative [Source:UniProtKB/TrEMBL
CADAFUAG00000282	4643.52	-0.794312	0.126417	-6.28326	3.31546e-10	2.92457e-09	Isa	147	CADAFUAG00000282	AFUA_3G02380	Afu3G02380	U2 auxiliary factor small subunit; putative [Source:UniProtKB/TrEMBL
CADAFUAG00000283	554.678	1.46446	0.143041	10.238	1.33916e-24	2.20262e-23	Itra	147	CADAFUAG00000283	AFUA_3G01090	Afu3G01090	Putative uncharacterized protein [Source:UniProtKB/TrEMBL
CADAFUAG00000283	554.678	-0.192253	0.126631	-1.51821	0.12896	0.237831	Isa	147	CADAFUAG00000283	AFUA_3G01090	Afu3G01090	Putative uncharacterized protein [Source:UniProtKB/TrEMBL
CADAFUAG00000284	1.82621	2.9919	2.39474	1.24936	0.211532	0.310829	Itra	147	CADAFUAG00000284	AFUA_3G02175	Afu3G02175	BTB/POZ domain protein [Source:UniProtKB/TrEMBL
CADAFUAG00000284	1.82621	-2.24621	2.54331	-0.883184	0.377137	NA	Isa	147	CADAFUAG00000284	AFUA_3G02175	Afu3G02175	BTB/POZ domain protein [Source:UniProtKB/TrEMBL
CADAFUAG00000285	21783.7	0.749563	0.0879571	8.52191	1.5694e-17	1.77445e-16	Itra	147	CADAFUAG00000285	AFUA_3G00900	Afu3G00900	Alpha-amylase; putative [Source:UniProtKB/TrEMBL
CADAFUAG00000285	21783.7	-0.5652	0.0872816	-6.47559	9.44406e-11	8.70637e-10	Isa	147	CADAFUAG00000285	AFUA_3G00900	Afu3G00900	Alpha-amylase; putative [Source:UniProtKB/TrEMBL
CADAFUAG00000286	5.38615	-0.946938	1.27866	-0.740569	0.458955	0.573147	Itra	147	CADAFUAG00000286	AFUA_3G02290	Afu3G02290	Arylsulfatase; putative [Source:UniProtKB/TrEMBL
CADAFUAG00000286	5.38615	-0.764529	1.02925	-0.742806	0.457599	0.613651	Isa	147	CADAFUAG00000286	AFUA_3G02290	Afu3G02290	Arylsulfatase; putative [Source:UniProtKB/TrEMBL
CADAFUAG00000287	128.808	0.293343	0.253866	1.1555	0.247884	0.353676	Itra	147	CADAFUAG00000287	AFUA_3G00330	Afu3G00330	NAD dependent epimerase/dehydratase family protein [Source:UniProtKB/TrEMBL
CADAFUAG00000287	128.808	0.209858	0.228862	0.916963	0.359162	0.516719	Isa	147	CADAFUAG00000287	AFUA_3G00330	Afu3G00330	NAD dependent epimerase/dehydratase family protein [Source:UniProtKB/TrEMBL
CADAFUAG00000288	187.701	0.96053	0.213843	4.49175	7.06407e-06	2.77883e-05	Itra	147	CADAFUAG00000288	AFUA_3G01330	Afu3G01330	Class II aldolase/adducin domain protein [Source:UniProtKB/TrEMBL
CADAFUAG00000288	187.701	0.103253	0.191929	0.537976	0.590594	0.728739	Isa	147	CADAFUAG00000288	AFUA_3G01330	Afu3G01330	Class II aldolase/adducin domain protein [Source:UniProtKB/TrEMBL
CADAFUAG00000289	0	NA	NA	NA	NA	NA	Itra	147	CADAFUAG00000289	AFUA_3G02585	Afu3G02585	Integral membrane protein [Source:UniProtKB/TrEMBL
CADAFUAG00000289	0	NA	NA	NA	NA	NA	Isa	147	CADAFUAG00000289	AFUA_3G02585	Afu3G02585	Integral membrane protein [Source:UniProtKB/TrEMBL
CADAFUAG00000290	200.304	0.399698	0.212856	1.87778	0.0604108	0.108265	Itra	147	CADAFUAG00000290	AFUA_3G01070	Afu3G01070	Tyrosinase; putative [Source:UniProtKB/TrEMBL
CADAFUAG00000290	200.304	-0.122322	0.197644	-0.618898	0.535984	0.682543	Isa	147	CADAFUAG00000290	AFUA_3G01070	Afu3G01070	Tyrosinase; putative [Source:UniProtKB/TrEMBL
CADAFUAG00000291	9.13552	0.349587	0.858102	0.407395	0.683718	0.765715	Itra	147	CADAFUAG00000291	AFUA_3G02030	Afu3G02030
CADAFUAG00000291	9.13552	0.492489	0.739384	0.666081	0.50536	0.655969	Isa	147	CADAFUAG00000291	AFUA_3G02030	Afu3G02030
CADAFUAG00000292	13.0829	0.496024	0.784581	0.632215	0.527246	0.632494	Itra	147	CADAFUAG00000292	AFUA_3G03460	Afu3G03460	HAD superfamily hydrolase; putative [Source:UniProtKB/TrEMBL
CADAFUAG00000292	13.0829	-0.465687	0.624278	-0.745961	0.455691	0.611997	Isa	147	CADAFUAG00000292	AFUA_3G03460	Afu3G03460	HAD superfamily hydrolase; putative [Source:UniProtKB/TrEMBL
CADAFUAG00000293	149.964	-0.155647	0.231411	-0.6726	0.501202	0.611034	Itra	147	CADAFUAG00000293	AFUA_3G01020	Afu3G01020	Putative uncharacterized protein [Source:UniProtKB/TrEMBL
CADAFUAG00000293	149.964	-0.252091	0.205631	-1.22594	0.220222	0.359297	Isa	147	CADAFUAG00000293	AFUA_3G01020	Afu3G01020	Putative uncharacterized protein [Source:UniProtKB/TrEMBL
CADAFUAG00000294	15.6944	1.35519	0.743263	1.8233	0.0682574	0.120205	Itra	147	CADAFUAG00000294	AFUA_3G01370	Afu3G01370	MFS transporter; putative [Source:UniProtKB/TrEMBL
CADAFUAG00000294	15.6944	-0.211193	0.546117	-0.386717	0.698966	0.812065	Isa	147	CADAFUAG00000294	AFUA_3G01370	Afu3G01370	MFS transporter; putative [Source:UniProtKB/TrEMBL
CADAFUAG00000295	3.09731	1.31307	1.49408	0.878852	0.379482	0.495	Itra	147	CADAFUAG00000295	AFUA_3G00120	Afu3G00120	Amino acid transporter (Mtr); putative [Source:UniProtKB/TrEMBL
CADAFUAG00000295	3.09731	0.8356	1.20525	0.6933	0.488121	0.641769	Isa	147	CADAFUAG00000295	AFUA_3G00120	Afu3G00120	Amino acid transporter (Mtr); putative [Source:UniProtKB/TrEMBL
CADAFUAG00000296	1055.06	0.374276	0.122833	3.04704	0.00231103	0.00599408	Itra	147	CADAFUAG00000296	AFUA_3G02000	Afu3G02000	C6 transcription factor Ctf1B-like; putative [Source:UniProtKB/TrEMBL
CADAFUAG00000296	1055.06	-0.745169	0.116763	-6.38189	1.74916e-10	1.58772e-09	Isa	147	CADAFUAG00000296	AFUA_3G02000	Afu3G02000	C6 transcription factor Ctf1B-like; putative [Source:UniProtKB/TrEMBL
CADAFUAG00000297	640.17	-0.672476	0.170714	-3.93921	8.17513e-05	0.000277431	Itra	147	CADAFUAG00000297	AFUA_3G04310	Afu3G04310	SnoRNA binding protein; putative [Source:UniProtKB/TrEMBL
CADAFUAG00000297	640.17	-0.250359	0.158309	-1.58145	0.113774	0.215658	Isa	147	CADAFUAG00000297	AFUA_3G04310	Afu3G04310	SnoRNA binding protein; putative [Source:UniProtKB/TrEMBL
CADAFUAG00000298	92.5073	4.41329	0.392836	11.2344	2.76271e-29	5.389e-28	Itra	147	CADAFUAG00000298	AFUA_3G03540	Afu3G03540	PKS-like enzyme; putative [Source:UniProtKB/TrEMBL
CADAFUAG00000298	92.5073	1.93625	0.329836	5.87033	4.34933e-09	3.36804e-08	Isa	147	CADAFUAG00000298	AFUA_3G03540	Afu3G03540	PKS-like enzyme; putative [Source:UniProtKB/TrEMBL
CADAFUAG00000299	0.582661	-0.728884	3.28096	-0.222156	0.824193	0.876656	Itra	147	CADAFUAG00000299	AFUA_3G02110	Afu3G02110	MFS multidrug transporter; putative [Source:UniProtKB/TrEMBL
CADAFUAG00000299	0.582661	2.23177	3.06318	0.728579	0.466259	NA	Isa	147	CADAFUAG00000299	AFUA_3G02110	Afu3G02110	MFS multidrug transporter; putative [Source:UniProtKB/TrEMBL
CADAFUAG00000300	963.989	1.50223	0.138187	10.871	1.58427e-27	2.89305e-26	Itra	147	CADAFUAG00000300	AFUA_3G00340	Afu3G00340	Glycosyl hydrolase; putative [Source:UniProtKB/TrEMBL
CADAFUAG00000300	963.989	0.987076	0.127135	7.76397	8.23117e-15	1.07396e-13	Isa	147	CADAFUAG00000300	AFUA_3G00340	Afu3G00340	Glycosyl hydrolase; putative [Source:UniProtKB/TrEMBL
CADAFUAG00000301	3.03985	1.87006	1.60586	1.16452	0.244211	0.349333	Itra	147	CADAFUAG00000301	AFUA_3G00480	Afu3G00480	RTA1 domain protein; putative [Source:UniProtKB/TrEMBL
CADAFUAG00000301	3.03985	0.167935	1.19268	0.140805	0.888024	0.936031	Isa	147	CADAFUAG00000301	AFUA_3G00480	Afu3G00480	RTA1 domain protein; putative [Source:UniProtKB/TrEMBL
CADAFUAG00000302	355.999	1.74175	0.173981	10.0112	1.3613e-23	2.14558e-22	Itra	147	CADAFUAG00000302	AFUA_3G00930	Afu3G00930	C6 transcription factor; putative [Source:UniProtKB/TrEMBL
CADAFUAG00000302	355.999	0.955146	0.147501	6.47554	9.44758e-11	8.70637e-10	Isa	147	CADAFUAG00000302	AFUA_3G00930	Afu3G00930	C6 transcription factor; putative [Source:UniProtKB/TrEMBL
CADAFUAG00000303	199.422	0.592854	0.220023	2.69451	0.00704914	0.0163717	Itra	147	CADAFUAG00000303	AFUA_3G02870	Afu3G02870	NUDIX domain; putative [Source:UniProtKB/TrEMBL
CADAFUAG00000303	199.422	0.237944	0.212636	1.11902	0.263132	0.412175	Isa	147	CADAFUAG00000303	AFUA_3G02870	Afu3G02870	NUDIX domain; putative [Source:UniProtKB/TrEMBL
CADAFUAG00000304	17.1653	0.618514	0.657066	0.941327	0.346537	0.462229	Itra	147	CADAFUAG00000304	AFUA_3G01510	Afu3G01510	C6 transcription factor; putative [Source:UniProtKB/TrEMBL
CADAFUAG00000304	17.1653	-0.221058	0.52441	-0.421536	0.673364	0.79248	Isa	147	CADAFUAG00000304	AFUA_3G01510	Afu3G01510	C6 transcription factor; putative [Source:UniProtKB/TrEMBL
CADAFUAG00000305	16.4286	-1.29632	0.722298	-1.79471	0.0727001	0.126822	Itra	147	CADAFUAG00000305	AFUA_3G02213	Afu3G02213	Putative uncharacterized protein [Source:UniProtKB/TrEMBL
CADAFUAG00000305	16.4286	-0.481209	0.553519	-0.869363	0.384649	0.544152	Isa	147	CADAFUAG00000305	AFUA_3G02213	Afu3G02213	Putative uncharacterized protein [Source:UniProtKB/TrEMBL
CADAFUAG00000306	1020.81	-0.738572	0.125663	-5.87739	4.16774e-09	2.37463e-08	Itra	147	CADAFUAG00000306	AFUA_3G04170	Afu3G04170	Pyruvate dehydrogenase E1 beta subunit PdbA; putative [Source:UniProtKB/TrEMBL
CADAFUAG00000306	1020.81	-0.330556	0.113358	-2.91604	0.00354507	0.0110927	Isa	147	CADAFUAG00000306	AFUA_3G04170	Afu3G04170	Pyruvate dehydrogenase E1 beta subunit PdbA; putative [Source:UniProtKB/TrEMBL
CADAFUAG00000307	61.6842	3.24626	0.442036	7.34388	2.0749e-13	1.72744e-12	Itra	147	CADAFUAG00000307	AFUA_3G01270	Afu3G01270	Putative uncharacterized protein [Source:UniProtKB/TrEMBL
CADAFUAG00000307	61.6842	2.27597	0.407962	5.57888	2.42067e-08	1.70556e-07	Isa	147	CADAFUAG00000307	AFUA_3G01270	Afu3G01270	Putative uncharacterized protein [Source:UniProtKB/TrEMBL
CADAFUAG00000308	1.54545	-1.26046	2.01907	-0.624276	0.532446	0.637238	Itra	147	CADAFUAG00000308	AFUA_3G00970	Afu3G00970	Putative uncharacterized protein [Source:UniProtKB/TrEMBL
CADAFUAG00000308	1.54545	3.18121	2.29884	1.38384	0.166409	NA	Isa	147	CADAFUAG00000308	AFUA_3G00970	Afu3G00970	Putative uncharacterized protein [Source:UniProtKB/TrEMBL
CADAFUAG00000309	291.51	-1.63507	0.24232	-6.74757	1.50342e-11	1.08598e-10	Itra	147	CADAFUAG00000309	AFUA_3G03940	Afu3G03940	2;3-diketo-5-methylthio-1-phosphopentane phosphatase; putative [Source:UniProtKB/TrEMBL
CADAFUAG00000309	291.51	-0.100159	0.181509	-0.551813	0.581077	0.720723	Isa	147	CADAFUAG00000309	AFUA_3G03940	Afu3G03940	2;3-diketo-5-methylthio-1-phosphopentane phosphatase; putative [Source:UniProtKB/TrEMBL
CADAFUAG00000310	27.9117	1.8853	0.493666	3.81898	0.000134006	0.00043777	Itra	147	CADAFUAG00000310	AFUA_3G00420	Afu3G00420	Acetyl xylan esterase (Axe1); putative [Source:UniProtKB/TrEMBL
CADAFUAG00000310	27.9117	0.544391	0.45165	1.20534	0.228073	0.368854	Isa	147	CADAFUAG00000310	AFUA_3G00420	Afu3G00420	Acetyl xylan esterase (Axe1); putative [Source:UniProtKB/TrEMBL
CADAFUAG00000311	116.807	-0.508856	0.275189	-1.84911	0.0644416	0.114597	Itra	147	CADAFUAG00000311	AFUA_3G00350	Afu3G00350	Putative uncharacterized protein [Source:UniProtKB/TrEMBL
CADAFUAG00000311	116.807	-0.175739	0.256267	-0.685765	0.492862	0.645661	Isa	147	CADAFUAG00000311	AFUA_3G00350	Afu3G00350	Putative uncharacterized protein [Source:UniProtKB/TrEMBL
CADAFUAG00000312	5.06198	0.26383	1.39693	0.188864	0.850199	0.895941	Itra	147	CADAFUAG00000312	AFUA_3G02880	Afu3G02880	Alpha-L-rhamnosidase C; putative [Source:UniProtKB/TrEMBL
CADAFUAG00000312	5.06198	0.870463	0.926832	0.939181	0.347638	0.505108	Isa	147	CADAFUAG00000312	AFUA_3G02880	Afu3G02880	Alpha-L-rhamnosidase C; putative [Source:UniProtKB/TrEMBL
CADAFUAG00000313	179.714	-1.50416	0.249094	-6.03854	1.55516e-09	9.38762e-09	Itra	147	CADAFUAG00000313	AFUA_3G01410	Afu3G01410	Polyketide synthase; putative [Source:UniProtKB/TrEMBL
CADAFUAG00000313	179.714	0.565484	0.192821	2.93269	0.00336041	0.0105659	Isa	147	CADAFUAG00000313	AFUA_3G01410	Afu3G01410	Polyketide synthase; putative [Source:UniProtKB/TrEMBL
CADAFUAG00000314	259.909	-0.430356	0.193608	-2.22282	0.0262281	0.0524395	Itra	147	CADAFUAG00000314	AFUA_3G04200	Afu3G04200	N2;N2-dimethylguanosine tRNA methyltransferase [Source:UniProtKB/TrEMBL
CADAFUAG00000314	259.909	-0.534599	0.166727	-3.20643	0.00134392	0.00464076	Isa	147	CADAFUAG00000314	AFUA_3G04200	Afu3G04200	N2;N2-dimethylguanosine tRNA methyltransferase [Source:UniProtKB/TrEMBL
CADAFUAG00000315	116.958	-0.257189	0.269784	-0.953314	0.340431	0.4555	Itra	147	CADAFUAG00000315	AFUA_3G00250	Afu3G00250	Salicylate hydroxylase; putative [Source:UniProtKB/TrEMBL
CADAFUAG00000315	116.958	-0.0805659	0.232145	-0.34705	0.728553	0.831741	Isa	147	CADAFUAG00000315	AFUA_3G00250	Afu3G00250	Salicylate hydroxylase; putative [Source:UniProtKB/TrEMBL
CADAFUAG00000316	1125.19	1.65391	0.16795	9.84763	7.01807e-23	1.07561e-21	Itra	147	CADAFUAG00000316	AFUA_3G00710	Afu3G00710	Allergen Asp F4-like; putative [Source:UniProtKB/TrEMBL
CADAFUAG00000316	1125.19	2.11908	0.144654	14.6493	1.36141e-48	1.11218e-46	Isa	147	CADAFUAG00000316	AFUA_3G00710	Afu3G00710	Allergen Asp F4-like; putative [Source:UniProtKB/TrEMBL
CADAFUAG00000317	3402.15	0.205316	0.110046	1.86572	0.0620799	0.110772	Itra	147	CADAFUAG00000317	AFUA_3G02270	Afu3G02270	Catalase B [Source:UniProtKB/Swiss-Prot
CADAFUAG00000317	3402.15	0.105061	0.103634	1.01377	0.310694	0.466166	Isa	147	CADAFUAG00000317	AFUA_3G02270	Afu3G02270	Catalase B [Source:UniProtKB/Swiss-Prot
CADAFUAG00000318	10132.5	-0.710545	0.113908	-6.23788	4.43531e-10	2.8274e-09	Itra	147	CADAFUAG00000318	AFUA_3G03440	Afu3G03440	MFS siderophore iron transporter; putative [Source:UniProtKB/TrEMBL
CADAFUAG00000318	10132.5	-1.14793	0.11286	-10.1713	2.66422e-24	6.39131e-23	Isa	147	CADAFUAG00000318	AFUA_3G03440	Afu3G03440	MFS siderophore iron transporter; putative [Source:UniProtKB/TrEMBL
CADAFUAG00000319	1.27874	-2.63598	2.30681	-1.14269	0.253166	0.359744	Itra	147	CADAFUAG00000319	AFUA_3G00630	Afu3G00630	Putative uncharacterized protein [Source:UniProtKB/TrEMBL
CADAFUAG00000319	1.27874	-0.229318	1.92337	-0.119227	0.905096	NA	Isa	147	CADAFUAG00000319	AFUA_3G00630	Afu3G00630	Putative uncharacterized protein [Source:UniProtKB/TrEMBL
CADAFUAG00000320	208.873	1.04341	0.211403	4.93568	7.98734e-07	3.5453e-06	Itra	147	CADAFUAG00000320	AFUA_3G01840	Afu3G01840	MFS transporter; putative [Source:UniProtKB/TrEMBL
CADAFUAG00000320	208.873	1.4526	0.176736	8.21903	2.05163e-16	3.07508e-15	Isa	147	CADAFUAG00000320	AFUA_3G01840	Afu3G01840	MFS transporter; putative [Source:UniProtKB/TrEMBL
CADAFUAG00000321	1.92706	4.63826	2.1956	2.11252	0.0346418	0.0669917	Itra	147	CADAFUAG00000321	AFUA_3G00460	Afu3G00460	Putative uncharacterized protein [Source:UniProtKB/TrEMBL
CADAFUAG00000321	1.92706	-1.43153	2.20892	-0.648065	0.516943	NA	Isa	147	CADAFUAG00000321	AFUA_3G00460	Afu3G00460	Putative uncharacterized protein [Source:UniProtKB/TrEMBL
CADAFUAG00000322	28.9259	-0.666249	0.529045	-1.25934	0.207907	0.30636	Itra	147	CADAFUAG00000322	AFUA_3G00680	Afu3G00680	Amine oxidase [Source:UniProtKB/TrEMBL
CADAFUAG00000322	28.9259	0.136594	0.428185	0.319006	0.749722	0.84653	Isa	147	CADAFUAG00000322	AFUA_3G00680	Afu3G00680	Amine oxidase [Source:UniProtKB/TrEMBL
CADAFUAG00000323	2794.02	-0.892866	0.114368	-7.80697	5.85804e-15	5.48668e-14	Itra	147	CADAFUAG00000323	AFUA_3G03400	Afu3G03400	Siderophore biosynthesis acetylase AceI; putative [Source:UniProtKB/TrEMBL
CADAFUAG00000323	2794.02	-1.103	0.111278	-9.91206	3.68952e-23	8.34328e-22	Isa	147	CADAFUAG00000323	AFUA_3G03400	Afu3G03400	Siderophore biosynthesis acetylase AceI; putative [Source:UniProtKB/TrEMBL
CADAFUAG00000324	141.298	2.65594	0.263594	10.0759	7.06398e-24	1.13036e-22	Itra	147	CADAFUAG00000324	AFUA_3G01050	Afu3G01050	Putative uncharacterized protein [Source:UniProtKB/TrEMBL
CADAFUAG00000324	141.298	1.65589	0.225212	7.3526	1.9439e-13	2.24838e-12	Isa	147	CADAFUAG00000324	AFUA_3G01050	Afu3G01050	Putative uncharacterized protein [Source:UniProtKB/TrEMBL
CADAFUAG00000325	19.5617	-0.608644	0.64278	-0.946893	0.343693	0.459019	Itra	147	CADAFUAG00000325	AFUA_3G01002	Afu3G01002	FAD dependent oxidoreductase; putative [Source:UniProtKB/TrEMBL
CADAFUAG00000325	19.5617	-0.231693	0.553182	-0.418837	0.675335	0.793977	Isa	147	CADAFUAG00000325	AFUA_3G01002	Afu3G01002	FAD dependent oxidoreductase; putative [Source:UniProtKB/TrEMBL
CADAFUAG00000326	25.849	2.60565	0.557227	4.67611	2.92371e-06	1.21224e-05	Itra	147	CADAFUAG00000326	AFUA_3G02840	Afu3G02840	Isopropanol dehydrogenase; putative [Source:UniProtKB/TrEMBL
CADAFUAG00000326	25.849	-0.524798	0.485734	-1.08042	0.279953	0.431958	Isa	147	CADAFUAG00000326	AFUA_3G02840	Afu3G02840	Isopropanol dehydrogenase; putative [Source:UniProtKB/TrEMBL
CADAFUAG00000327	8.87872	2.3369	0.951894	2.455	0.0140884	0.0301265	Itra	147	CADAFUAG00000327	AFUA_3G00300	Afu3G00300
CADAFUAG00000327	8.87872	1.64342	0.833716	1.9712	0.0487014	0.107608	Isa	147	CADAFUAG00000327	AFUA_3G00300	Afu3G00300
CADAFUAG00000328	4117.16	-0.552684	0.122999	-4.49339	7.00983e-06	2.75864e-05	Itra	147	CADAFUAG00000328	AFUA_3G03570	Afu3G03570	67 kDa myosin-cross-reactive antigen family protein [Source:UniProtKB/TrEMBL
CADAFUAG00000328	4117.16	-1.2456	0.114603	-10.8688	1.62236e-27	4.71198e-26	Isa	147	CADAFUAG00000328	AFUA_3G03570	Afu3G03570	67 kDa myosin-cross-reactive antigen family protein [Source:UniProtKB/TrEMBL
CADAFUAG00000329	81.9191	1.41527	0.291594	4.85358	1.21253e-06	5.2608e-06	Itra	147	CADAFUAG00000329	AFUA_3G02430	Afu3G02430	Putative uncharacterized protein [Source:UniProtKB/TrEMBL
CADAFUAG00000329	81.9191	0.848756	0.359963	2.3579	0.0183788	0.0467225	Isa	147	CADAFUAG00000329	AFUA_3G02430	Afu3G02430	Putative uncharacterized protein [Source:UniProtKB/TrEMBL
CADAFUAG00000330	4.06258	-2.79827	1.64553	-1.70052	0.0890325	0.150963	Itra	147	CADAFUAG00000330	AFUA_3G03170	Afu3G03170	Flavin-containing monooxygenase; putative [Source:UniProtKB/TrEMBL
CADAFUAG00000330	4.06258	-1.24711	1.13097	-1.1027	0.27016	0.420709	Isa	147	CADAFUAG00000330	AFUA_3G03170	Afu3G03170	Flavin-containing monooxygenase; putative [Source:UniProtKB/TrEMBL
CADAFUAG00000331	0	NA	NA	NA	NA	NA	Itra	147	CADAFUAG00000331	AFUA_3G02610	Afu3G02610	MFS transporter; putative [Source:UniProtKB/TrEMBL
CADAFUAG00000331	0	NA	NA	NA	NA	NA	Isa	147	CADAFUAG00000331	AFUA_3G02610	Afu3G02610	MFS transporter; putative [Source:UniProtKB/TrEMBL
CADAFUAG00000332	20.0783	-0.411325	0.697882	-0.58939	0.555599	0.658641	Itra	147	CADAFUAG00000332	AFUA_3G02920	Afu3G02920	C6 transcription factor; putative [Source:UniProtKB/TrEMBL
CADAFUAG00000332	20.0783	0.0633529	0.470884	0.13454	0.892975	0.938732	Isa	147	CADAFUAG00000332	AFUA_3G02920	Afu3G02920	C6 transcription factor; putative [Source:UniProtKB/TrEMBL
CADAFUAG00000333	53.246	-1.44213	0.402067	-3.5868	0.000334757	0.00102147	Itra	147	CADAFUAG00000333	AFUA_3G01350	Afu3G01350	Proteinase; putative [Source:UniProtKB/TrEMBL
CADAFUAG00000333	53.246	-1.37226	0.317831	-4.31758	1.57748e-05	7.75917e-05	Isa	147	CADAFUAG00000333	AFUA_3G01350	Afu3G01350	Proteinase; putative [Source:UniProtKB/TrEMBL
CADAFUAG00000334	75.2768	2.34063	0.342538	6.83319	8.30447e-12	6.08242e-11	Itra	147	CADAFUAG00000334	AFUA_3G01810	Afu3G01810	F-box domain protein [Source:UniProtKB/TrEMBL
CADAFUAG00000334	75.2768	1.20742	0.274761	4.39443	1.11066e-05	5.60146e-05	Isa	147	CADAFUAG00000334	AFUA_3G01810	Afu3G01810	F-box domain protein [Source:UniProtKB/TrEMBL
CADAFUAG00000335	163630	0.892351	0.133491	6.68471	2.31385e-11	1.64249e-10	Itra	147	CADAFUAG00000335	AFUA_3G00880	Afu3G00880	UPF0619 GPI-anchored membrane protein AFUA_3G00880 [Source:UniProtKB/Swiss-Prot
CADAFUAG00000335	163630	-0.741563	0.133422	-5.55804	2.7282e-08	1.9089e-07	Isa	147	CADAFUAG00000335	AFUA_3G00880	Afu3G00880	UPF0619 GPI-anchored membrane protein AFUA_3G00880 [Source:UniProtKB/Swiss-Prot
CADAFUAG00000336	37.8393	1.17669	0.512804	2.29462	0.0217547	0.0443641	Itra	147	CADAFUAG00000336	AFUA_3G02140	Afu3G02140	Ion channel; putative [Source:UniProtKB/TrEMBL
CADAFUAG00000336	37.8393	0.19164	0.488893	0.391988	0.695067	0.808923	Isa	147	CADAFUAG00000336	AFUA_3G02140	Afu3G02140	Ion channel; putative [Source:UniProtKB/TrEMBL
CADAFUAG00000337	1.14592	-1.76794	2.56107	-0.690313	0.489997	0.600944	Itra	147	CADAFUAG00000337	AFUA_3G02470	Afu3G02470	Amidase family protein [Source:UniProtKB/TrEMBL
CADAFUAG00000337	1.14592	0.280734	2.08379	0.134723	0.892831	NA	Isa	147	CADAFUAG00000337	AFUA_3G02470	Afu3G02470	Amidase family protein [Source:UniProtKB/TrEMBL
CADAFUAG00000338	19.1649	0.113908	0.599951	0.189861	0.849418	0.895417	Itra	147	CADAFUAG00000338	AFUA_3G00640	Afu3G00640	Putative uncharacterized protein [Source:UniProtKB/TrEMBL
CADAFUAG00000338	19.1649	-0.387155	0.539213	-0.718001	0.472757	0.627574	Isa	147	CADAFUAG00000338	AFUA_3G00640	Afu3G00640	Putative uncharacterized protein [Source:UniProtKB/TrEMBL
CADAFUAG00000339	896.361	2.38655	0.134681	17.7201	2.93328e-70	2.23331e-68	Itra	147	CADAFUAG00000339	AFUA_3G01850	Afu3G01850	Porphyromonas-type peptidyl-arginine deiminase superfamily [Source:UniProtKB/TrEMBL
CADAFUAG00000339	896.361	1.64926	0.121241	13.6031	3.83862e-42	2.27507e-40	Isa	147	CADAFUAG00000339	AFUA_3G01850	Afu3G01850	Porphyromonas-type peptidyl-arginine deiminase superfamily [Source:UniProtKB/TrEMBL
CADAFUAG00000340	6.90069	0.752553	1.0615	0.708953	0.478354	0.590963	Itra	147	CADAFUAG00000340	AFUA_3G03820	Afu3G03820	MFS nicotinic acid transporter Tna1; putative [Source:UniProtKB/TrEMBL
CADAFUAG00000340	6.90069	-0.0269658	0.828542	-0.0325461	0.974037	0.985547	Isa	147	CADAFUAG00000340	AFUA_3G03820	Afu3G03820	MFS nicotinic acid transporter Tna1; putative [Source:UniProtKB/TrEMBL
CADAFUAG00000341	25.1155	3.21322	0.648888	4.95189	7.34963e-07	3.2823e-06	Itra	147	CADAFUAG00000341	AFUA_3G03300	Afu3G03300	FAD-binding oxidoreductase; putative [Source:UniProtKB/TrEMBL
CADAFUAG00000341	25.1155	1.72093	0.521925	3.29728	0.000976254	0.00346901	Isa	147	CADAFUAG00000341	AFUA_3G03300	Afu3G03300	FAD-binding oxidoreductase; putative [Source:UniProtKB/TrEMBL
CADAFUAG00000342	0.289969	0	4.74074	0	1	NA	Itra	147	CADAFUAG00000342	AFUA_3G02590	Afu3G02590	C6 transcription factor; putative [Source:UniProtKB/TrEMBL
CADAFUAG00000342	0.289969	3.52634	4.58003	0.769937	0.441337	NA	Isa	147	CADAFUAG00000342	AFUA_3G02590	Afu3G02590	C6 transcription factor; putative [Source:UniProtKB/TrEMBL
CADAFUAG00000343	2.60583	3.23921	1.90208	1.70298	0.0885717	0.150343	Itra	147	CADAFUAG00000343	AFUA_3G01160	Afu3G01160	Iron-sulfur cluster-binding protein; rieske family domain protein [Source:UniProtKB/TrEMBL
CADAFUAG00000343	2.60583	0.523401	1.39289	0.375767	0.70709	NA	Isa	147	CADAFUAG00000343	AFUA_3G01160	Afu3G01160	Iron-sulfur cluster-binding protein; rieske family domain protein [Source:UniProtKB/TrEMBL
CADAFUAG00000344	107.684	-1.14751	0.291984	-3.93002	8.4937e-05	0.000287508	Itra	147	CADAFUAG00000344	AFUA_3G04260	Afu3G04260	DNA-binding protein HGH1; putative [Source:UniProtKB/TrEMBL
CADAFUAG00000344	107.684	-0.704475	0.234833	-2.99989	0.00270074	0.00872472	Isa	147	CADAFUAG00000344	AFUA_3G04260	Afu3G04260	DNA-binding protein HGH1; putative [Source:UniProtKB/TrEMBL
CADAFUAG00000345	0.367589	-0.574181	3.79216	-0.151413	0.87965	NA	Itra	147	CADAFUAG00000345	AFUA_3G01220	Afu3G01220	Probable aspartic-type endopeptidase AFUA_3G01220 [Source:UniProtKB/Swiss-Prot
CADAFUAG00000345	0.367589	1.25212	3.66532	0.341612	0.732643	NA	Isa	147	CADAFUAG00000345	AFUA_3G01220	Afu3G01220	Probable aspartic-type endopeptidase AFUA_3G01220 [Source:UniProtKB/Swiss-Prot
CADAFUAG00000346	0	NA	NA	NA	NA	NA	Itra	147	CADAFUAG00000346	AFUA_3G02650	Afu3G02650	MYB DNA binding domain protein [Source:UniProtKB/TrEMBL
CADAFUAG00000346	0	NA	NA	NA	NA	NA	Isa	147	CADAFUAG00000346	AFUA_3G02650	Afu3G02650	MYB DNA binding domain protein [Source:UniProtKB/TrEMBL
CADAFUAG00000347	15.2515	-1.18643	0.739007	-1.60543	0.108399	0.178416	Itra	147	CADAFUAG00000347	AFUA_3G02960	Afu3G02960	Putative uncharacterized protein [Source:UniProtKB/TrEMBL
CADAFUAG00000347	15.2515	0.236167	0.544588	0.433662	0.664534	0.785351	Isa	147	CADAFUAG00000347	AFUA_3G02960	Afu3G02960	Putative uncharacterized protein [Source:UniProtKB/TrEMBL
CADAFUAG00000348	166.586	-0.720554	0.243143	-2.9635	0.00304165	0.00766992	Itra	147	CADAFUAG00000348	AFUA_3G00750	Afu3G00750	Short-chain dehydrogenase/reductase; putative [Source:UniProtKB/TrEMBL
CADAFUAG00000348	166.586	0.342811	0.200042	1.71369	0.0865856	0.173209	Isa	147	CADAFUAG00000348	AFUA_3G00750	Afu3G00750	Short-chain dehydrogenase/reductase; putative [Source:UniProtKB/TrEMBL
CADAFUAG00000349	12800.7	0.936037	0.0976413	9.58648	9.11408e-22	1.32175e-20	Itra	147	CADAFUAG00000349	AFUA_3G03620	Afu3G03620	Glycosyl transferase; putative [Source:UniProtKB/TrEMBL
CADAFUAG00000349	12800.7	-0.341197	0.0965229	-3.53488	0.000407965	0.00156424	Isa	147	CADAFUAG00000349	AFUA_3G03620	Afu3G03620	Glycosyl transferase; putative [Source:UniProtKB/TrEMBL
CADAFUAG00000350	94.8754	2.83449	0.397618	7.12867	1.01344e-12	8.00661e-12	Itra	147	CADAFUAG00000350	AFUA_3G00830	Afu3G00830	Pfs domain protein [Source:UniProtKB/TrEMBL
CADAFUAG00000350	94.8754	0.418627	0.355253	1.17839	0.238641	0.382602	Isa	147	CADAFUAG00000350	AFUA_3G00830	Afu3G00830	Pfs domain protein [Source:UniProtKB/TrEMBL
CADAFUAG00000351	3.76365	1.99758	1.58097	1.26351	0.206405	0.30467	Itra	147	CADAFUAG00000351	AFUA_3G01710	Afu3G01710	TPR domain protein [Source:UniProtKB/TrEMBL
CADAFUAG00000351	3.76365	-1.11122	1.20654	-0.921	0.35705	0.514419	Isa	147	CADAFUAG00000351	AFUA_3G01710	Afu3G01710	TPR domain protein [Source:UniProtKB/TrEMBL
CADAFUAG00000352	5.79872	2.72624	1.40463	1.94089	0.0522717	0.0958805	Itra	147	CADAFUAG00000352	AFUA_3G04010	Afu3G04010	MFS transporter; putative [Source:UniProtKB/TrEMBL
CADAFUAG00000352	5.79872	-0.787789	0.928602	-0.84836	0.396238	0.555861	Isa	147	CADAFUAG00000352	AFUA_3G04010	Afu3G04010	MFS transporter; putative [Source:UniProtKB/TrEMBL
CADAFUAG00000353	18.9542	1.12384	0.589068	1.90782	0.0564141	0.102237	Itra	147	CADAFUAG00000353	AFUA_3G03240	Afu3G03240	MFS monocarboxylate transporter; putative [Source:UniProtKB/TrEMBL
CADAFUAG00000353	18.9542	1.06498	0.520664	2.04542	0.0408137	0.0929663	Isa	147	CADAFUAG00000353	AFUA_3G03240	Afu3G03240	MFS monocarboxylate transporter; putative [Source:UniProtKB/TrEMBL
CADAFUAG00000354	6.45149	-0.992101	1.02312	-0.969677	0.332207	0.447797	Itra	147	CADAFUAG00000354	AFUA_3G03295	Afu3G03295	Putative uncharacterized protein [Source:UniProtKB/TrEMBL
CADAFUAG00000354	6.45149	-1.01123	0.971172	-1.04125	0.29776	0.452276	Isa	147	CADAFUAG00000354	AFUA_3G03295	Afu3G03295	Putative uncharacterized protein [Source:UniProtKB/TrEMBL
CADAFUAG00000355	22.567	-2.08812	0.816909	-2.55613	0.0105845	0.0234353	Itra	147	CADAFUAG00000355	AFUA_3G03950	Afu3G03950	Endoglucanase; putative [Source:UniProtKB/TrEMBL
CADAFUAG00000355	22.567	-0.262472	0.49041	-0.535211	0.592504	0.729904	Isa	147	CADAFUAG00000355	AFUA_3G03950	Afu3G03950	Endoglucanase; putative [Source:UniProtKB/TrEMBL
CADAFUAG00000356	2.68524	-0.600067	1.64532	-0.364712	0.715327	0.791259	Itra	147	CADAFUAG00000356	AFUA_3G01470	Afu3G01470	Putative uncharacterized protein [Source:UniProtKB/TrEMBL
CADAFUAG00000356	2.68524	0.560332	1.33743	0.418962	0.675244	NA	Isa	147	CADAFUAG00000356	AFUA_3G01470	Afu3G01470	Putative uncharacterized protein [Source:UniProtKB/TrEMBL
CADAFUAG00000357	84.9027	0.803464	0.300972	2.66957	0.00759493	0.0174887	Itra	147	CADAFUAG00000357	AFUA_3G00670	Afu3G00670	DUF1275 domain protein [Source:UniProtKB/TrEMBL
CADAFUAG00000357	84.9027	0.0442774	0.263387	0.168108	0.866499	0.923098	Isa	147	CADAFUAG00000357	AFUA_3G00670	Afu3G00670	DUF1275 domain protein [Source:UniProtKB/TrEMBL
CADAFUAG00000358	637.938	1.01237	0.139917	7.23555	4.63632e-13	3.73477e-12	Itra	147	CADAFUAG00000358	AFUA_3G03630	Afu3G03630	Putative uncharacterized protein [Source:UniProtKB/TrEMBL
CADAFUAG00000358	637.938	0.179508	0.127063	1.41274	0.157731	0.277191	Isa	147	CADAFUAG00000358	AFUA_3G03630	Afu3G03630	Putative uncharacterized protein [Source:UniProtKB/TrEMBL
CADAFUAG00000359	21.8687	1.04919	0.569334	1.84284	0.0653524	0.115954	Itra	147	CADAFUAG00000359	AFUA_3G03250	Afu3G03250	Aldehyde dehydrogenase family protein; putative [Source:UniProtKB/TrEMBL
CADAFUAG00000359	21.8687	0.0576033	0.49637	0.116049	0.907614	0.946549	Isa	147	CADAFUAG00000359	AFUA_3G03250	Afu3G03250	Aldehyde dehydrogenase family protein; putative [Source:UniProtKB/TrEMBL
CADAFUAG00000360	126.01	0.476442	0.281893	1.69016	0.0909982	0.153743	Itra	147	CADAFUAG00000360	AFUA_3G00220	Afu3G00220	MFS sugar transporter; putative [Source:UniProtKB/TrEMBL
CADAFUAG00000360	126.01	0.657217	0.22333	2.94281	0.00325251	0.0102909	Isa	147	CADAFUAG00000360	AFUA_3G00220	Afu3G00220	MFS sugar transporter; putative [Source:UniProtKB/TrEMBL
CADAFUAG00000361	5475.33	-1.0334	0.101538	-10.1774	2.50048e-24	4.06318e-23	Itra	147	CADAFUAG00000361	AFUA_3G04210	Afu3G04210	Fatty acid synthase alpha subunit FasA [Source:UniProtKB/TrEMBL
CADAFUAG00000361	5475.33	-0.0551257	0.0955043	-0.577207	0.5638	0.705957	Isa	147	CADAFUAG00000361	AFUA_3G04210	Afu3G04210	Fatty acid synthase alpha subunit FasA [Source:UniProtKB/TrEMBL
CADAFUAG00000362	40.8853	2.63432	0.446777	5.89628	3.71783e-09	2.12831e-08	Itra	147	CADAFUAG00000362	AFUA_3G01280	Afu3G01280	Alpha/beta hydrolase; putative [Source:UniProtKB/TrEMBL
CADAFUAG00000362	40.8853	1.20443	0.383833	3.1379	0.00170163	0.00572982	Isa	147	CADAFUAG00000362	AFUA_3G01280	Afu3G01280	Alpha/beta hydrolase; putative [Source:UniProtKB/TrEMBL
CADAFUAG00000363	37.9468	-1.2787	0.47181	-2.71019	0.0067244	0.0156947	Itra	147	CADAFUAG00000363	AFUA_3G01750	Afu3G01750	G protein coupled receptor family protein [Source:UniProtKB/TrEMBL
CADAFUAG00000363	37.9468	0.157023	0.373855	0.420011	0.674478	0.793482	Isa	147	CADAFUAG00000363	AFUA_3G01750	Afu3G01750	G protein coupled receptor family protein [Source:UniProtKB/TrEMBL
CADAFUAG00000364	20.8382	-1.33277	0.654399	-2.03664	0.0416865	0.0787597	Itra	147	CADAFUAG00000364	AFUA_3G03852	Afu3G03852	C2H2 type zinc finger domain protein [Source:UniProtKB/TrEMBL
CADAFUAG00000364	20.8382	1.28911	0.487802	2.64269	0.00822492	0.0231986	Isa	147	CADAFUAG00000364	AFUA_3G03852	Afu3G03852	C2H2 type zinc finger domain protein [Source:UniProtKB/TrEMBL
CADAFUAG00000365	91.4336	-1.44207	0.328182	-4.39412	1.11222e-05	4.27835e-05	Itra	147	CADAFUAG00000365	AFUA_3G03910	Afu3G03910	IQ calmodulin-binding motif protein [Source:UniProtKB/TrEMBL
CADAFUAG00000365	91.4336	0.20326	0.24247	0.838287	0.40187	0.561503	Isa	147	CADAFUAG00000365	AFUA_3G03910	Afu3G03910	IQ calmodulin-binding motif protein [Source:UniProtKB/TrEMBL
CADAFUAG00000366	16.0471	0.994406	0.72045	1.38026	0.167508	0.256478	Itra	147	CADAFUAG00000366	AFUA_3G02100	Afu3G02100	Short-chain dehydrogenase/reductase; putative [Source:UniProtKB/TrEMBL
CADAFUAG00000366	16.0471	2.09295	0.574498	3.64309	0.000269382	0.0010681	Isa	147	CADAFUAG00000366	AFUA_3G02100	Afu3G02100	Short-chain dehydrogenase/reductase; putative [Source:UniProtKB/TrEMBL
CADAFUAG00000367	223.499	-1.14257	0.263228	-4.34062	1.42083e-05	5.4002e-05	Itra	147	CADAFUAG00000367	AFUA_3G02257	Afu3G02257	Putative uncharacterized protein [Source:UniProtKB/TrEMBL
CADAFUAG00000367	223.499	-0.548656	0.170464	-3.2186	0.00128816	0.00447036	Isa	147	CADAFUAG00000367	AFUA_3G02257	Afu3G02257	Putative uncharacterized protein [Source:UniProtKB/TrEMBL
CADAFUAG00000368	9.78414	0.86412	0.965752	0.894763	0.370914	0.486631	Itra	147	CADAFUAG00000368	AFUA_3G01620	Afu3G01620	Ankyrin and HET domain protein [Source:UniProtKB/TrEMBL
CADAFUAG00000368	9.78414	-0.206362	0.666896	-0.309437	0.756989	0.851977	Isa	147	CADAFUAG00000368	AFUA_3G01620	Afu3G01620	Ankyrin and HET domain protein [Source:UniProtKB/TrEMBL
CADAFUAG00000369	368.546	-1.53681	0.179132	-8.57918	9.55523e-18	1.09612e-16	Itra	147	CADAFUAG00000369	AFUA_3G03390	Afu3G03390	Siderophore biosynthesis lipase/esterase; putative [Source:UniProtKB/TrEMBL
CADAFUAG00000369	368.546	-0.749759	0.147441	-5.08516	3.67325e-07	2.24167e-06	Isa	147	CADAFUAG00000369	AFUA_3G03390	Afu3G03390	Siderophore biosynthesis lipase/esterase; putative [Source:UniProtKB/TrEMBL
CADAFUAG00000370	26.7523	-0.467298	0.542425	-0.861497	0.388964	0.504217	Itra	147	CADAFUAG00000370	AFUA_3G02700	Afu3G02700	C6 transcription factor; putative [Source:UniProtKB/TrEMBL
CADAFUAG00000370	26.7523	0.0670883	0.44558	0.150564	0.88032	0.93289	Isa	147	CADAFUAG00000370	AFUA_3G02700	Afu3G02700	C6 transcription factor; putative [Source:UniProtKB/TrEMBL
CADAFUAG00000371	1.51223	0.62056	2.41223	0.257256	0.796981	0.856786	Itra	147	CADAFUAG00000371	AFUA_3G01310	Afu3G01310	Putative uncharacterized protein [Source:UniProtKB/TrEMBL
CADAFUAG00000371	1.51223	0.851591	1.69252	0.503149	0.61486	NA	Isa	147	CADAFUAG00000371	AFUA_3G01310	Afu3G01310	Putative uncharacterized protein [Source:UniProtKB/TrEMBL
CADAFUAG00000372	36.8951	-0.343987	0.442051	-0.778161	0.436474	0.551788	Itra	147	CADAFUAG00000372	AFUA_3G01360	Afu3G01360	Siderochrome-iron transporter; putative [Source:UniProtKB/TrEMBL
CADAFUAG00000372	36.8951	-0.163527	0.378232	-0.432344	0.665491	0.78638	Isa	147	CADAFUAG00000372	AFUA_3G01360	Afu3G01360	Siderochrome-iron transporter; putative [Source:UniProtKB/TrEMBL
CADAFUAG00000373	17.0426	2.71384	0.772529	3.51294	0.000443186	0.00132451	Itra	147	CADAFUAG00000373	AFUA_3G03190	Afu3G03190	MFS multidrug transporter; putative [Source:UniProtKB/TrEMBL
CADAFUAG00000373	17.0426	1.10059	0.577633	1.90534	0.0567362	0.12206	Isa	147	CADAFUAG00000373	AFUA_3G03190	Afu3G03190	MFS multidrug transporter; putative [Source:UniProtKB/TrEMBL
CADAFUAG00000374	44.0845	-0.810464	0.467105	-1.73508	0.0827269	0.141561	Itra	147	CADAFUAG00000374	AFUA_3G03790	Afu3G03790	Putative uncharacterized protein [Source:UniProtKB/TrEMBL
CADAFUAG00000374	44.0845	-1.33674	0.381788	-3.50127	0.000463042	0.00175465	Isa	147	CADAFUAG00000374	AFUA_3G03790	Afu3G03790	Putative uncharacterized protein [Source:UniProtKB/TrEMBL
CADAFUAG00000375	4311.73	1.31156	0.108401	12.0991	1.06781e-33	2.55868e-32	Itra	147	CADAFUAG00000375	AFUA_3G04070	Afu3G04070	BZIP transcription factor HacA [Source:UniProtKB/TrEMBL			2
CADAFUAG00000375	4311.73	0.332007	0.104796	3.16814	0.00153415	0.00522015	Isa	147	CADAFUAG00000375	AFUA_3G04070	Afu3G04070	BZIP transcription factor HacA [Source:UniProtKB/TrEMBL			2
CADAFUAG00000376	4110.85	1.21413	0.0960365	12.6423	1.23345e-36	3.23471e-35	Itra	147	CADAFUAG00000376	AFUA_3G02520	Afu3G02520	MFS multidrug transporter; putative [Source:UniProtKB/TrEMBL
CADAFUAG00000376	4110.85	0.147404	0.0934736	1.57696	0.114806	0.216933	Isa	147	CADAFUAG00000376	AFUA_3G02520	Afu3G02520	MFS multidrug transporter; putative [Source:UniProtKB/TrEMBL
CADAFUAG00000377	27.5579	1.81791	0.513695	3.53889	0.000401812	0.00120812	Itra	147	CADAFUAG00000377	AFUA_3G01950	Afu3G01950	Zinc-containing alcohol dehydrogenase; putative [Source:UniProtKB/TrEMBL
CADAFUAG00000377	27.5579	0.865919	0.478039	1.8114	0.070079	0.145818	Isa	147	CADAFUAG00000377	AFUA_3G01950	Afu3G01950	Zinc-containing alcohol dehydrogenase; putative [Source:UniProtKB/TrEMBL
CADAFUAG00000378	21.0015	0.600573	0.52942	1.1344	0.256628	0.363842	Itra	147	CADAFUAG00000378	AFUA_3G02360	Afu3G02360	FAD dependent oxidoreductase superfamily [Source:UniProtKB/TrEMBL
CADAFUAG00000378	21.0015	-0.0617965	0.540844	-0.114259	0.909032	0.947374	Isa	147	CADAFUAG00000378	AFUA_3G02360	Afu3G02360	FAD dependent oxidoreductase superfamily [Source:UniProtKB/TrEMBL
CADAFUAG00000379	9.42996	2.34436	1.05018	2.23234	0.0255925	0.0513427	Itra	147	CADAFUAG00000379	AFUA_3G01130	Afu3G01130	Cell wall protein; putative [Source:UniProtKB/TrEMBL
CADAFUAG00000379	9.42996	0.466381	0.721465	0.646436	0.517997	0.66712	Isa	147	CADAFUAG00000379	AFUA_3G01130	Afu3G01130	Cell wall protein; putative [Source:UniProtKB/TrEMBL
CADAFUAG00000380	5.3944	-0.549116	1.12371	-0.488663	0.62508	0.719505	Itra	147	CADAFUAG00000380	AFUA_3G03450	Afu3G03450	Cytochrome P450 oxidoreductase; putative [Source:UniProtKB/TrEMBL
CADAFUAG00000380	5.3944	-1.49093	1.12617	-1.3239	0.185537	0.314594	Isa	147	CADAFUAG00000380	AFUA_3G03450	Afu3G03450	Cytochrome P450 oxidoreductase; putative [Source:UniProtKB/TrEMBL
CADAFUAG00000381	5.6529	-0.955637	1.16836	-0.817931	0.413397	0.529276	Itra	147	CADAFUAG00000381	AFUA_3G02210	Afu3G02210	C6 transcription factor; putative [Source:UniProtKB/TrEMBL
CADAFUAG00000381	5.6529	-0.130143	0.909382	-0.143112	0.886202	0.935656	Isa	147	CADAFUAG00000381	AFUA_3G02210	Afu3G02210	C6 transcription factor; putative [Source:UniProtKB/TrEMBL
CADAFUAG00000382	2.64733	0.985731	1.62598	0.60624	0.544355	0.649224	Itra	147	CADAFUAG00000382	AFUA_3G02690	Afu3G02690	Putative uncharacterized protein [Source:UniProtKB/TrEMBL
CADAFUAG00000382	2.64733	0.200831	1.37932	0.145601	0.884236	NA	Isa	147	CADAFUAG00000382	AFUA_3G02690	Afu3G02690	Putative uncharacterized protein [Source:UniProtKB/TrEMBL
CADAFUAG00000383	1191.45	-0.734016	0.176823	-4.15113	3.30838e-05	0.000118851	Itra	147	CADAFUAG00000383	AFUA_3G03040	Afu3G03040	Putative uncharacterized protein [Source:UniProtKB/TrEMBL
CADAFUAG00000383	1191.45	-0.064287	0.173783	-0.369927	0.711437	0.82109	Isa	147	CADAFUAG00000383	AFUA_3G03040	Afu3G03040	Putative uncharacterized protein [Source:UniProtKB/TrEMBL
CADAFUAG00000384	1150.29	6.44585	0.208886	30.8582	4.34677e-209	3.41982e-206	Itra	147	CADAFUAG00000384	AFUA_3G01500	Afu3G01500	Integral membrane protein [Source:UniProtKB/TrEMBL
CADAFUAG00000384	1150.29	3.61173	0.166027	21.7538	6.35548e-105	3.03323e-102	Isa	147	CADAFUAG00000384	AFUA_3G01500	Afu3G01500	Integral membrane protein [Source:UniProtKB/TrEMBL
CADAFUAG00000385	4.86795	1.11209	1.14539	0.970931	0.331583	0.447083	Itra	147	CADAFUAG00000385	AFUA_3G01460	Afu3G01460	Salicylate hydroxylase; putative [Source:UniProtKB/TrEMBL
CADAFUAG00000385	4.86795	0.18788	1.02194	0.183848	0.854133	0.916607	Isa	147	CADAFUAG00000385	AFUA_3G01460	Afu3G01460	Salicylate hydroxylase; putative [Source:UniProtKB/TrEMBL
CADAFUAG00000386	46.2842	0.250394	0.387723	0.645807	0.518404	0.625624	Itra	147	CADAFUAG00000386	AFUA_3G02790	Afu3G02790	Amidohydrolase family protein [Source:UniProtKB/TrEMBL
CADAFUAG00000386	46.2842	0.45167	0.329434	1.37105	0.17036	0.293805	Isa	147	CADAFUAG00000386	AFUA_3G02790	Afu3G02790	Amidohydrolase family protein [Source:UniProtKB/TrEMBL
CADAFUAG00000387	55.4548	-0.237088	0.38313	-0.61882	0.536035	0.640758	Itra	147	CADAFUAG00000387	AFUA_3G02980	Afu3G02980	Metalloreductase Fre8; putative [Source:UniProtKB/TrEMBL				Ensembl BLAST + domain check: Mitochondrial phosphate carrier protein?
CADAFUAG00000387	55.4548	0.227714	0.315851	0.720956	0.470937	0.625891	Isa	147	CADAFUAG00000387	AFUA_3G02980	Afu3G02980	Metalloreductase Fre8; putative [Source:UniProtKB/TrEMBL
CADAFUAG00000388	8482.81	-2.30311	0.101291	-22.7375	1.90766e-114	3.91526e-112	Itra	147	CADAFUAG00000388	AFUA_3G00720	Afu3G00720	DUF500 and UBA/TS-N domain protein [Source:UniProtKB/TrEMBL
CADAFUAG00000388	8482.81	-0.564867	0.0929721	-6.07566	1.23482e-09	1.01609e-08	Isa	147	CADAFUAG00000388	AFUA_3G00720	Afu3G00720	DUF500 and UBA/TS-N domain protein [Source:UniProtKB/TrEMBL
CADAFUAG00000389	1551.49	4.17592	0.154957	26.9489	5.88001e-160	2.41362e-157	Itra	147	CADAFUAG00000389	AFUA_3G03550	Afu3G03550	Putative uncharacterized protein [Source:UniProtKB/TrEMBL
CADAFUAG00000389	1551.49	1.97687	0.133134	14.8487	7.09179e-50	6.1246e-48	Isa	147	CADAFUAG00000389	AFUA_3G03550	Afu3G03550	Putative uncharacterized protein [Source:UniProtKB/TrEMBL
CADAFUAG00000390	137.692	0.910599	0.257309	3.53894	0.00040174	0.00120812	Itra	147	CADAFUAG00000390	AFUA_3G03600	Afu3G03600	Carboxylesterase; putative [Source:UniProtKB/TrEMBL
CADAFUAG00000390	137.692	-0.037474	0.206324	-0.181626	0.855876	0.917262	Isa	147	CADAFUAG00000390	AFUA_3G03600	Afu3G03600	Carboxylesterase; putative [Source:UniProtKB/TrEMBL
CADAFUAG00000391	120.463	-0.765515	0.249506	-3.06813	0.00215404	0.00561777	Itra	147	CADAFUAG00000391	AFUA_3G01340	Afu3G01340	DUF636 domain protein [Source:UniProtKB/TrEMBL
CADAFUAG00000391	120.463	-1.04166	0.225574	-4.61784	3.87763e-06	2.08926e-05	Isa	147	CADAFUAG00000391	AFUA_3G01340	Afu3G01340	DUF636 domain protein [Source:UniProtKB/TrEMBL
CADAFUAG00000392	588.912	-0.507389	0.144508	-3.51114	0.000446184	0.0013322	Itra	147	CADAFUAG00000392	AFUA_3G04130	Afu3G04130	Glutamyl-tRNA(Gln) amidotransferase subunit A; mitochondrial [Source:UniProtKB/Swiss-Prot
CADAFUAG00000392	588.912	-0.598324	0.132076	-4.53015	5.89427e-06	3.09492e-05	Isa	147	CADAFUAG00000392	AFUA_3G04130	Afu3G04130	Glutamyl-tRNA(Gln) amidotransferase subunit A; mitochondrial [Source:UniProtKB/Swiss-Prot
CADAFUAG00000393	142.177	-2.74633	0.353242	-7.77462	7.56749e-15	7.01814e-14	Itra	147	CADAFUAG00000393	AFUA_3G03670	Afu3G03670	ABC multidrug transporter; putative [Source:UniProtKB/TrEMBL
CADAFUAG00000393	142.177	-2.43667	0.225778	-10.7923	3.74291e-27	1.0508e-25	Isa	147	CADAFUAG00000393	AFUA_3G03670	Afu3G03670	ABC multidrug transporter; putative [Source:UniProtKB/TrEMBL
CADAFUAG00000394	65.1592	0.568302	0.370662	1.53321	0.125224	0.201731	Itra	147	CADAFUAG00000394	AFUA_3G03030	Afu3G03030	Catechol dioxygenase; putative [Source:UniProtKB/TrEMBL
CADAFUAG00000394	65.1592	-0.832137	0.300952	-2.76502	0.00569198	0.016769	Isa	147	CADAFUAG00000394	AFUA_3G03030	Afu3G03030	Catechol dioxygenase; putative [Source:UniProtKB/TrEMBL
CADAFUAG00000395	105.269	0.143075	0.258948	0.552523	0.58059	0.682014	Itra	147	CADAFUAG00000395	AFUA_3G04180	Afu3G04180	C2H2 finger domain protein; putative [Source:UniProtKB/TrEMBL
CADAFUAG00000395	105.269	-0.0374254	0.231164	-0.1619	0.871385	0.926881	Isa	147	CADAFUAG00000395	AFUA_3G04180	Afu3G04180	C2H2 finger domain protein; putative [Source:UniProtKB/TrEMBL
CADAFUAG00000396	2609.81	-1.81713	0.118194	-15.3742	2.43955e-53	1.1235e-51	Itra	147	CADAFUAG00000396	AFUA_3G00130	Afu3G00130	Putative uncharacterized protein [Source:UniProtKB/TrEMBL
CADAFUAG00000396	2609.81	-1.11099	0.106137	-10.4675	1.21828e-25	3.1564e-24	Isa	147	CADAFUAG00000396	AFUA_3G00130	Afu3G00130	Putative uncharacterized protein [Source:UniProtKB/TrEMBL
CADAFUAG00000397	507.811	-1.82984	0.190346	-9.61323	7.0311e-22	1.02439e-20	Itra	147	CADAFUAG00000397	AFUA_3G02070	Afu3G02070	C2H2 transcription factor; putative [Source:UniProtKB/TrEMBL
CADAFUAG00000397	507.811	1.31626	0.128331	10.2568	1.10323e-24	2.71114e-23	Isa	147	CADAFUAG00000397	AFUA_3G02070	Afu3G02070	C2H2 transcription factor; putative [Source:UniProtKB/TrEMBL
CADAFUAG00000398	6.92332	1.00227	1.04609	0.95811	0.338007	0.453478	Itra	147	CADAFUAG00000398	AFUA_3G00780	Afu3G00780	cAMP receptor (Car4); putative [Source:UniProtKB/TrEMBL
CADAFUAG00000398	6.92332	0.616004	0.82498	0.74669	0.455251	0.611631	Isa	147	CADAFUAG00000398	AFUA_3G00780	Afu3G00780	cAMP receptor (Car4); putative [Source:UniProtKB/TrEMBL
CADAFUAG00000399	4181.14	2.09922	0.10784	19.466	2.13191e-84	2.23637e-82	Itra	147	CADAFUAG00000399	AFUA_3G03330	Afu3G03330	Mitochondrial enoyl reductase; putative [Source:UniProtKB/TrEMBL
CADAFUAG00000399	4181.14	0.0347109	0.106153	0.326988	0.743677	0.842455	Isa	147	CADAFUAG00000399	AFUA_3G03330	Afu3G03330	Mitochondrial enoyl reductase; putative [Source:UniProtKB/TrEMBL
CADAFUAG00000400	88.1339	-0.593126	0.411427	-1.44163	0.149407	0.233033	Itra	147	CADAFUAG00000400	AFUA_6G03670	Afu6G03670	Biotin synthase; putative [Source:UniProtKB/TrEMBL
CADAFUAG00000400	88.1339	0.343679	0.337556	1.01814	0.308611	0.464017	Isa	147	CADAFUAG00000400	AFUA_6G03670	Afu6G03670	Biotin synthase; putative [Source:UniProtKB/TrEMBL
CADAFUAG00000401	242.641	1.33528	0.197883	6.74784	1.5006e-11	1.08547e-10	Itra	147	CADAFUAG00000401	AFUA_6G02680	Afu6G02680	Ankyrin repeat and BTB/POZ domain protein [Source:UniProtKB/TrEMBL
CADAFUAG00000401	242.641	0.301673	0.171294	1.76115	0.0782133	0.15981	Isa	147	CADAFUAG00000401	AFUA_6G02680	Afu6G02680	Ankyrin repeat and BTB/POZ domain protein [Source:UniProtKB/TrEMBL
CADAFUAG00000402	58.9969	0.00773006	0.373276	0.0207087	0.983478	0.988974	Itra	147	CADAFUAG00000402	AFUA_6G02360	Afu6G02360	Putative uncharacterized protein [Source:UniProtKB/TrEMBL
CADAFUAG00000402	58.9969	0.457525	0.31772	1.44003	0.14986	0.26651	Isa	147	CADAFUAG00000402	AFUA_6G02360	Afu6G02360	Putative uncharacterized protein [Source:UniProtKB/TrEMBL
CADAFUAG00000403	118.247	1.74315	0.274228	6.35658	2.0629e-10	1.34968e-09	Itra	147	CADAFUAG00000403	AFUA_6G03320	Afu6G03320	MFS multidrug transporter; putative [Source:UniProtKB/TrEMBL
CADAFUAG00000403	118.247	1.68226	0.224211	7.50306	6.23468e-14	7.45859e-13	Isa	147	CADAFUAG00000403	AFUA_6G03320	Afu6G03320	MFS multidrug transporter; putative [Source:UniProtKB/TrEMBL
CADAFUAG00000404	321.363	0.0650812	0.185803	0.350271	0.726136	0.800683	Itra	147	CADAFUAG00000404	AFUA_6G05260	Afu6G05260	GPI ethanolamine phosphate transferase 2 [Source:UniProtKB/Swiss-Prot
CADAFUAG00000404	321.363	-0.133321	0.165979	-0.803236	0.421838	0.581607	Isa	147	CADAFUAG00000404	AFUA_6G05260	Afu6G05260	GPI ethanolamine phosphate transferase 2 [Source:UniProtKB/Swiss-Prot
CADAFUAG00000405	369.754	0.177154	0.163323	1.08468	0.278061	0.38834	Itra	147	CADAFUAG00000405	AFUA_6G02780	Afu6G02780	Acyl-protein thioesterase 1 [Source:UniProtKB/Swiss-Prot
CADAFUAG00000405	369.754	-0.120064	0.154917	-0.775026	0.438324	0.596537	Isa	147	CADAFUAG00000405	AFUA_6G02780	Afu6G02780	Acyl-protein thioesterase 1 [Source:UniProtKB/Swiss-Prot
CADAFUAG00000406	147.939	-1.02312	0.269233	-3.80011	0.000144633	0.000468915	Itra	147	CADAFUAG00000406	AFUA_6G03580	Afu6G03580	mRNA-nucleus export ATPase (Elf1); putative [Source:UniProtKB/TrEMBL
CADAFUAG00000406	147.939	-0.269439	0.199022	-1.35381	0.175796	0.301289	Isa	147	CADAFUAG00000406	AFUA_6G03580	Afu6G03580	mRNA-nucleus export ATPase (Elf1); putative [Source:UniProtKB/TrEMBL
CADAFUAG00000407	1214.77	0.609825	0.134177	4.54493	5.49527e-06	2.18814e-05	Itra	147	CADAFUAG00000407	AFUA_6G03770	Afu6G03770	Oxidoreductase (Msc7); putative [Source:UniProtKB/TrEMBL
CADAFUAG00000407	1214.77	-0.0832989	0.125023	-0.666266	0.505241	0.655909	Isa	147	CADAFUAG00000407	AFUA_6G03770	Afu6G03770	Oxidoreductase (Msc7); putative [Source:UniProtKB/TrEMBL
CADAFUAG00000408	12.7137	0.43153	0.802203	0.537931	0.590625	0.689854	Itra	147	CADAFUAG00000408	AFUA_6G02580	Afu6G02580	Putative uncharacterized protein [Source:UniProtKB/TrEMBL
CADAFUAG00000408	12.7137	0.37193	0.674354	0.551535	0.581267	0.72086	Isa	147	CADAFUAG00000408	AFUA_6G02580	Afu6G02580	Putative uncharacterized protein [Source:UniProtKB/TrEMBL
CADAFUAG00000409	202.297	2.61902	0.234035	11.1907	4.5289e-29	8.76176e-28	Itra	147	CADAFUAG00000409	AFUA_6G02790	Afu6G02790	Putative uncharacterized protein [Source:UniProtKB/TrEMBL
CADAFUAG00000409	202.297	1.59395	0.198787	8.01837	1.07162e-15	1.54e-14	Isa	147	CADAFUAG00000409	AFUA_6G02790	Afu6G02790	Putative uncharacterized protein [Source:UniProtKB/TrEMBL
CADAFUAG00000410	160.384	0.437778	0.220344	1.98679	0.0469453	0.0872806	Itra	147	CADAFUAG00000410	AFUA_6G04240	Afu6G04240	PAP2 domain protein [Source:UniProtKB/TrEMBL
CADAFUAG00000410	160.384	-0.30233	0.199177	-1.5179	0.129041	0.23793	Isa	147	CADAFUAG00000410	AFUA_6G04240	Afu6G04240	PAP2 domain protein [Source:UniProtKB/TrEMBL
CADAFUAG00000411	80.1734	-0.805358	0.331831	-2.42701	0.0152238	0.0323712	Itra	147	CADAFUAG00000411	AFUA_6G03260	Afu6G03260	Aspartic endopeptidase (AP1); putative [Source:UniProtKB/TrEMBL
CADAFUAG00000411	80.1734	-0.188804	0.267883	-0.7048	0.480935	0.634436	Isa	147	CADAFUAG00000411	AFUA_6G03260	Afu6G03260	Aspartic endopeptidase (AP1); putative [Source:UniProtKB/TrEMBL
CADAFUAG00000412	408.764	0.609084	0.161078	3.78131	0.000156005	0.000503364	Itra	147	CADAFUAG00000412	AFUA_6G04780	Afu6G04780	Vacuolar protein sorting 55 superfamily [Source:UniProtKB/TrEMBL
CADAFUAG00000412	408.764	0.414268	0.141928	2.91885	0.00351325	0.0110045	Isa	147	CADAFUAG00000412	AFUA_6G04780	Afu6G04780	Vacuolar protein sorting 55 superfamily [Source:UniProtKB/TrEMBL
CADAFUAG00000413	90.9961	-1.1411	0.314102	-3.63289	0.00028026	0.000865534	Itra	147	CADAFUAG00000413	AFUA_6G02670	Afu6G02670	G2-specific protein kinase NimA; putative [Source:UniProtKB/TrEMBL
CADAFUAG00000413	90.9961	-0.171253	0.253917	-0.674445	0.500029	0.651584	Isa	147	CADAFUAG00000413	AFUA_6G02670	Afu6G02670	G2-specific protein kinase NimA; putative [Source:UniProtKB/TrEMBL
CADAFUAG00000414	64.0057	-0.989417	0.346171	-2.85817	0.00426088	0.0104377	Itra	147	CADAFUAG00000414	AFUA_6G02400	Afu6G02400	MFS drug efflux pump; putative [Source:UniProtKB/TrEMBL
CADAFUAG00000414	64.0057	-0.399287	0.31052	-1.28587	0.198489	0.330925	Isa	147	CADAFUAG00000414	AFUA_6G02400	Afu6G02400	MFS drug efflux pump; putative [Source:UniProtKB/TrEMBL
CADAFUAG00000415	207.476	-0.0563186	0.201262	-0.279827	0.779611	0.84222	Itra	147	CADAFUAG00000415	AFUA_6G05050	Afu6G05050	DUF410 domain protein [Source:UniProtKB/TrEMBL
CADAFUAG00000415	207.476	-0.0756733	0.18178	-0.41629	0.677198	0.79565	Isa	147	CADAFUAG00000415	AFUA_6G05050	Afu6G05050	DUF410 domain protein [Source:UniProtKB/TrEMBL
CADAFUAG00000416	246.612	0.188261	0.200867	0.937245	0.348633	0.464302	Itra	147	CADAFUAG00000416	AFUA_6G05000	Afu6G05000	Glycosyl hydrolases family 32 superfamily [Source:UniProtKB/TrEMBL
CADAFUAG00000416	246.612	0.0355694	0.182313	0.195101	0.845314	0.911441	Isa	147	CADAFUAG00000416	AFUA_6G05000	Afu6G05000	Glycosyl hydrolases family 32 superfamily [Source:UniProtKB/TrEMBL
CADAFUAG00000417	3.34257	-0.0509178	1.43238	-0.0355478	0.971643	0.981835	Itra	147	CADAFUAG00000417	AFUA_6G02980	Afu6G02980	Probable exopolygalacturonase X [Source:UniProtKB/Swiss-Prot
CADAFUAG00000417	3.34257	0.0629016	1.24382	0.0505714	0.959667	0.977672	Isa	147	CADAFUAG00000417	AFUA_6G02980	Afu6G02980	Probable exopolygalacturonase X [Source:UniProtKB/Swiss-Prot
CADAFUAG00000418	210.998	0.162312	0.207544	0.782064	0.434177	0.549473	Itra	147	CADAFUAG00000418	AFUA_6G04500	Afu6G04500	Snf1 kinase complex beta-subunit Gal83; putative [Source:UniProtKB/TrEMBL
CADAFUAG00000418	210.998	0.216349	0.168716	1.28233	0.199728	0.332684	Isa	147	CADAFUAG00000418	AFUA_6G04500	Afu6G04500	Snf1 kinase complex beta-subunit Gal83; putative [Source:UniProtKB/TrEMBL
CADAFUAG00000419	511.547	-0.793811	0.173144	-4.58468	4.54685e-06	1.83605e-05	Itra	147	CADAFUAG00000419	AFUA_6G03820	Afu6G03820	Nascent polypeptide-associated complex subunit alpha [Source:UniProtKB/Swiss-Prot
CADAFUAG00000419	511.547	-0.395187	0.154935	-2.55066	0.0107518	0.029296	Isa	147	CADAFUAG00000419	AFUA_6G03820	Afu6G03820	Nascent polypeptide-associated complex subunit alpha [Source:UniProtKB/Swiss-Prot
CADAFUAG00000420	694.32	-0.188064	0.145862	-1.28933	0.197282	0.293128	Itra	147	CADAFUAG00000420	AFUA_6G04390	Afu6G04390	E3 ubiquitin-protein ligase bre1 [Source:UniProtKB/Swiss-Prot
CADAFUAG00000420	694.32	0.257518	0.137232	1.87652	0.0605839	0.128991	Isa	147	CADAFUAG00000420	AFUA_6G04390	Afu6G04390	E3 ubiquitin-protein ligase bre1 [Source:UniProtKB/Swiss-Prot
CADAFUAG00000421	7.90904	0.957771	0.960941	0.996701	0.31891	0.433337	Itra	147	CADAFUAG00000421	AFUA_6G01860	Afu6G01860	MFS lactose permease; putative [Source:UniProtKB/TrEMBL
CADAFUAG00000421	7.90904	1.40845	0.812	1.73454	0.0828225	0.167306	Isa	147	CADAFUAG00000421	AFUA_6G01860	Afu6G01860	MFS lactose permease; putative [Source:UniProtKB/TrEMBL
CADAFUAG00000422	4319.12	0.908571	0.10321	8.80317	1.33006e-18	1.60577e-17	Itra	147	CADAFUAG00000422	AFUA_6G03060	Afu6G03060	MFS monosaccharide transporter; putative [Source:UniProtKB/TrEMBL
CADAFUAG00000422	4319.12	1.09751	0.10116	10.8493	2.01044e-27	5.7692e-26	Isa	147	CADAFUAG00000422	AFUA_6G03060	Afu6G03060	MFS monosaccharide transporter; putative [Source:UniProtKB/TrEMBL
CADAFUAG00000423	639.335	0.137649	0.149341	0.921711	0.356679	0.472685	Itra	147	CADAFUAG00000423	AFUA_6G04470	Afu6G04470	Putative uncharacterized protein [Source:UniProtKB/TrEMBL
CADAFUAG00000423	639.335	-0.816178	0.142481	-5.72833	1.01424e-08	7.51398e-08	Isa	147	CADAFUAG00000423	AFUA_6G04470	Afu6G04470	Putative uncharacterized protein [Source:UniProtKB/TrEMBL
CADAFUAG00000424	864.159	0.18229	0.154345	1.18106	0.23758	0.341763	Itra	147	CADAFUAG00000424	AFUA_6G05290	Afu6G05290	Exocyst complex component Sec15; putative [Source:UniProtKB/TrEMBL
CADAFUAG00000424	864.159	0.23461	0.145301	1.61464	0.106388	0.204508	Isa	147	CADAFUAG00000424	AFUA_6G05290	Afu6G05290	Exocyst complex component Sec15; putative [Source:UniProtKB/TrEMBL
CADAFUAG00000425	12.8104	-6.57118	1.55691	-4.22066	2.43585e-05	8.90315e-05	Itra	147	CADAFUAG00000425	AFUA_6G03200	Afu6G03200	Solute symporter family transporter [Source:UniProtKB/TrEMBL
CADAFUAG00000425	12.8104	-2.18121	0.811606	-2.68752	0.0071985	0.0206688	Isa	147	CADAFUAG00000425	AFUA_6G03200	Afu6G03200	Solute symporter family transporter [Source:UniProtKB/TrEMBL
CADAFUAG00000426	429.549	0.137635	0.167837	0.820051	0.412187	0.528371	Itra	147	CADAFUAG00000426	AFUA_6G04880	Afu6G04880	Serine-rich protein; putative [Source:UniProtKB/TrEMBL
CADAFUAG00000426	429.549	0.159486	0.138634	1.15041	0.249977	0.396777	Isa	147	CADAFUAG00000426	AFUA_6G04880	Afu6G04880	Serine-rich protein; putative [Source:UniProtKB/TrEMBL
CADAFUAG00000427	399.091	-0.259367	0.186199	-1.39296	0.163633	0.251606	Itra	147	CADAFUAG00000427	AFUA_6G02260	Afu6G02260	Putative uncharacterized protein [Source:UniProtKB/TrEMBL
CADAFUAG00000427	399.091	-0.531208	0.168125	-3.15959	0.0015799	0.00535572	Isa	147	CADAFUAG00000427	AFUA_6G02260	Afu6G02260	Putative uncharacterized protein [Source:UniProtKB/TrEMBL
CADAFUAG00000428	426.644	1.56089	0.173075	9.01857	1.9056e-19	2.40841e-18	Itra	147	CADAFUAG00000428	AFUA_6G03930	Afu6G03930	Putative uncharacterized protein [Source:UniProtKB/TrEMBL
CADAFUAG00000428	426.644	0.885649	0.161162	5.49539	3.89854e-08	2.67615e-07	Isa	147	CADAFUAG00000428	AFUA_6G03930	Afu6G03930	Putative uncharacterized protein [Source:UniProtKB/TrEMBL
CADAFUAG00000429	45.4128	1.84454	0.425613	4.33383	1.46536e-05	5.54931e-05	Itra	147	CADAFUAG00000429	AFUA_6G01905	Afu6G01905	Putative uncharacterized protein [Source:UniProtKB/TrEMBL
CADAFUAG00000429	45.4128	0.998524	0.35176	2.83865	0.00453049	0.0137907	Isa	147	CADAFUAG00000429	AFUA_6G01905	Afu6G01905	Putative uncharacterized protein [Source:UniProtKB/TrEMBL
CADAFUAG00000430	294.793	0.615851	0.196232	3.13839	0.0016988	0.00453959	Itra	147	CADAFUAG00000430	AFUA_6G04060	Afu6G04060	Putative uncharacterized protein [Source:UniProtKB/TrEMBL
CADAFUAG00000430	294.793	0.290403	0.172835	1.68023	0.0929129	0.18316	Isa	147	CADAFUAG00000430	AFUA_6G04060	Afu6G04060	Putative uncharacterized protein [Source:UniProtKB/TrEMBL
CADAFUAG00000431	119.114	-0.0297881	0.287247	-0.103702	0.917406	0.943977	Itra	147	CADAFUAG00000431	AFUA_6G04410	Afu6G04410	DUF1183 domain protein [Source:UniProtKB/TrEMBL
CADAFUAG00000431	119.114	-0.216373	0.232872	-0.929147	0.352813	0.509858	Isa	147	CADAFUAG00000431	AFUA_6G04410	Afu6G04410	DUF1183 domain protein [Source:UniProtKB/TrEMBL
CADAFUAG00000432	105.9	0.426128	0.269252	1.58263	0.113505	0.185816	Itra	147	CADAFUAG00000432	AFUA_6G05220	Afu6G05220	BET3 family protein [Source:UniProtKB/TrEMBL
CADAFUAG00000432	105.9	0.0840822	0.239661	0.350839	0.72571	0.830024	Isa	147	CADAFUAG00000432	AFUA_6G05220	Afu6G05220	BET3 family protein [Source:UniProtKB/TrEMBL
CADAFUAG00000433	35.3528	-0.772036	0.456375	-1.69167	0.0907084	0.153335	Itra	147	CADAFUAG00000433	AFUA_6G01850	Afu6G01850	Putative uncharacterized protein [Source:UniProtKB/TrEMBL
CADAFUAG00000433	35.3528	-0.0334248	0.417838	-0.0799945	0.936242	0.964599	Isa	147	CADAFUAG00000433	AFUA_6G01850	Afu6G01850	Putative uncharacterized protein [Source:UniProtKB/TrEMBL
CADAFUAG00000434	69.1615	0.96019	0.325333	2.95141	0.00316326	0.00795323	Itra	147	CADAFUAG00000434	AFUA_6G02560	Afu6G02560	Alpha-galactosidase; putative [Source:UniProtKB/TrEMBL
CADAFUAG00000434	69.1615	-0.0561094	0.279844	-0.200503	0.841088	0.909056	Isa	147	CADAFUAG00000434	AFUA_6G02560	Afu6G02560	Alpha-galactosidase; putative [Source:UniProtKB/TrEMBL
CADAFUAG00000435	516.4	3.27262	0.171786	19.0506	6.50086e-81	6.07669e-79	Itra	147	CADAFUAG00000435	AFUA_6G03090	Afu6G03090	Cytochrome P450 alkane hydroxylase; putative [Source:UniProtKB/TrEMBL
CADAFUAG00000435	516.4	2.76639	0.159567	17.3369	2.4784e-67	3.94283e-65	Isa	147	CADAFUAG00000435	AFUA_6G03090	Afu6G03090	Cytochrome P450 alkane hydroxylase; putative [Source:UniProtKB/TrEMBL
CADAFUAG00000436	153.092	0.0416787	0.231239	0.180241	0.856964	0.900456	Itra	147	CADAFUAG00000436	AFUA_6G03780	Afu6G03780	Putative uncharacterized protein [Source:UniProtKB/TrEMBL
CADAFUAG00000436	153.092	0.559513	0.194473	2.87707	0.00401382	0.0123885	Isa	147	CADAFUAG00000436	AFUA_6G03780	Afu6G03780	Putative uncharacterized protein [Source:UniProtKB/TrEMBL
CADAFUAG00000437	488.73	1.74957	0.167242	10.4613	1.30022e-25	2.21179e-24	Itra	147	CADAFUAG00000437	AFUA_6G03430	Afu6G03430	C6 finger domain protein; putative [Source:UniProtKB/TrEMBL
CADAFUAG00000437	488.73	1.97555	0.154649	12.7744	2.2792e-37	1.03339e-35	Isa	147	CADAFUAG00000437	AFUA_6G03430	Afu6G03430	C6 finger domain protein; putative [Source:UniProtKB/TrEMBL
CADAFUAG00000438	341.357	-2.16498	0.193709	-11.1765	5.31566e-29	1.02419e-27	Itra	147	CADAFUAG00000438	AFUA_6G04970	Afu6G04970	Phosphoserine aminotransferase [Source:UniProtKB/TrEMBL
CADAFUAG00000438	341.357	-0.197481	0.145569	-1.35661	0.174904	0.3001	Isa	147	CADAFUAG00000438	AFUA_6G04970	Afu6G04970	Phosphoserine aminotransferase [Source:UniProtKB/TrEMBL
CADAFUAG00000439	265.015	-0.231954	0.190588	-1.21704	0.223588	0.324953	Itra	147	CADAFUAG00000439	AFUA_6G02730	Afu6G02730	MFS transporter; putative [Source:UniProtKB/TrEMBL
CADAFUAG00000439	265.015	0.402791	0.155553	2.58941	0.00961405	0.0266606	Isa	147	CADAFUAG00000439	AFUA_6G02730	Afu6G02730	MFS transporter; putative [Source:UniProtKB/TrEMBL
CADAFUAG00000440	176.812	1.06157	0.235468	4.50835	6.53342e-06	2.57976e-05	Itra	147	CADAFUAG00000440	AFUA_6G02510	Afu6G02510	Chitin biosynthesis protein (Chs5); putative [Source:UniProtKB/TrEMBL
CADAFUAG00000440	176.812	0.563652	0.196117	2.87406	0.00405238	0.0124905	Isa	147	CADAFUAG00000440	AFUA_6G02510	Afu6G02510	Chitin biosynthesis protein (Chs5); putative [Source:UniProtKB/TrEMBL
CADAFUAG00000441	59.7045	-1.3254	0.362783	-3.65343	0.00025876	0.00080281	Itra	147	CADAFUAG00000441	AFUA_6G02810	Afu6G02810	Ctr copper transporter; putative [Source:UniProtKB/TrEMBL
CADAFUAG00000441	59.7045	-0.272794	0.309071	-0.882626	0.377438	0.536543	Isa	147	CADAFUAG00000441	AFUA_6G02810	Afu6G02810	Ctr copper transporter; putative [Source:UniProtKB/TrEMBL
CADAFUAG00000442	208.991	-0.515664	0.208841	-2.46917	0.0135429	0.0290973	Itra	147	CADAFUAG00000442	AFUA_6G04220	Afu6G04220	Putative uncharacterized protein [Source:UniProtKB/TrEMBL
CADAFUAG00000442	208.991	-0.280016	0.175112	-1.59907	0.109805	0.209492	Isa	147	CADAFUAG00000442	AFUA_6G04220	Afu6G04220	Putative uncharacterized protein [Source:UniProtKB/TrEMBL
CADAFUAG00000443	255.661	-0.706131	0.202061	-3.49464	0.000474708	0.00140757	Itra	147	CADAFUAG00000443	AFUA_6G04520	Afu6G04520	SET domain protein [Source:UniProtKB/TrEMBL
CADAFUAG00000443	255.661	-0.185374	0.161778	-1.14585	0.251856	0.398853	Isa	147	CADAFUAG00000443	AFUA_6G04520	Afu6G04520	SET domain protein [Source:UniProtKB/TrEMBL
CADAFUAG00000444	290.414	-0.902993	0.196275	-4.60066	4.21152e-06	1.71162e-05	Itra	147	CADAFUAG00000444	AFUA_6G05080	Afu6G05080	ABC transporter; putative [Source:UniProtKB/TrEMBL
CADAFUAG00000444	290.414	-0.654732	0.167462	-3.90974	9.23969e-05	0.000396336	Isa	147	CADAFUAG00000444	AFUA_6G05080	Afu6G05080	ABC transporter; putative [Source:UniProtKB/TrEMBL
CADAFUAG00000445	53.749	-0.243052	0.373314	-0.651065	0.515005	0.622555	Itra	147	CADAFUAG00000445	AFUA_6G04810	Afu6G04810	Mediator of RNA polymerase II transcription subunit 6 [Source:UniProtKB/Swiss-Prot
CADAFUAG00000445	53.749	-0.677202	0.341601	-1.98244	0.0474303	0.105261	Isa	147	CADAFUAG00000445	AFUA_6G04810	Afu6G04810	Mediator of RNA polymerase II transcription subunit 6 [Source:UniProtKB/Swiss-Prot
CADAFUAG00000446	674.145	-0.278032	0.133061	-2.08951	0.0366615	0.0703928	Itra	147	CADAFUAG00000446	AFUA_6G02970	Afu6G02970	UPF0041 domain protein [Source:UniProtKB/TrEMBL
CADAFUAG00000446	674.145	-0.242125	0.12461	-1.94307	0.0520079	0.113449	Isa	147	CADAFUAG00000446	AFUA_6G02970	Afu6G02970	UPF0041 domain protein [Source:UniProtKB/TrEMBL
CADAFUAG00000447	4184.14	-2.45886	0.133244	-18.4539	4.85384e-76	4.05532e-74	Itra	147	CADAFUAG00000447	AFUA_6G03690	Afu6G03690	Sodium P-type ATPase; putative [Source:UniProtKB/TrEMBL
CADAFUAG00000447	4184.14	-1.63454	0.127933	-12.7765	2.21854e-37	1.01094e-35	Isa	147	CADAFUAG00000447	AFUA_6G03690	Afu6G03690	Sodium P-type ATPase; putative [Source:UniProtKB/TrEMBL
CADAFUAG00000448	223.617	0.535349	0.221806	2.4136	0.0157959	0.0334295	Itra	147	CADAFUAG00000448	AFUA_6G04600	Afu6G04600	Putative uncharacterized protein [Source:UniProtKB/TrEMBL
CADAFUAG00000448	223.617	-0.400606	0.169596	-2.36212	0.018171	0.0462849	Isa	147	CADAFUAG00000448	AFUA_6G04600	Afu6G04600	Putative uncharacterized protein [Source:UniProtKB/TrEMBL
CADAFUAG00000449	91.1437	-0.234976	0.306703	-0.766133	0.443597	0.558771	Itra	147	CADAFUAG00000449	AFUA_6G03390	Afu6G03390	Glutathione S-transferase family protein; putative [Source:UniProtKB/TrEMBL
CADAFUAG00000449	91.1437	-0.240403	0.263715	-0.911598	0.36198	0.519726	Isa	147	CADAFUAG00000449	AFUA_6G03390	Afu6G03390	Glutathione S-transferase family protein; putative [Source:UniProtKB/TrEMBL
CADAFUAG00000450	430.223	-0.914797	0.177005	-5.16819	2.36373e-07	1.12537e-06	Itra	147	CADAFUAG00000450	AFUA_6G04860	Afu6G04860	MBOAT family protein; putative [Source:UniProtKB/TrEMBL
CADAFUAG00000450	430.223	-0.433278	0.153633	-2.82021	0.00479925	0.0145017	Isa	147	CADAFUAG00000450	AFUA_6G04860	Afu6G04860	MBOAT family protein; putative [Source:UniProtKB/TrEMBL
CADAFUAG00000451	51.8356	-0.390088	0.405742	-0.96142	0.336341	0.451885	Itra	147	CADAFUAG00000451	AFUA_6G02150	Afu6G02150	Signal peptide peptidase; putative [Source:UniProtKB/TrEMBL
CADAFUAG00000451	51.8356	-0.134593	0.302664	-0.444695	0.65654	0.778847	Isa	147	CADAFUAG00000451	AFUA_6G02150	Afu6G02150	Signal peptide peptidase; putative [Source:UniProtKB/TrEMBL
CADAFUAG00000452	115.416	-0.46257	0.262234	-1.76396	0.0777383	0.134444	Itra	147	CADAFUAG00000452	AFUA_6G02550	Afu6G02550	Mitochondrial inner membrane magnesium transporter mrs2 [Source:UniProtKB/Swiss-Prot
CADAFUAG00000452	115.416	-0.507003	0.226555	-2.23788	0.0252289	0.0615649	Isa	147	CADAFUAG00000452	AFUA_6G02550	Afu6G02550	Mitochondrial inner membrane magnesium transporter mrs2 [Source:UniProtKB/Swiss-Prot
CADAFUAG00000453	205.616	0.0512269	0.212495	0.241074	0.809498	0.865283	Itra	147	CADAFUAG00000453	AFUA_6G04340	Afu6G04340	Putative uncharacterized protein [Source:UniProtKB/TrEMBL
CADAFUAG00000453	205.616	-0.399452	0.18514	-2.15757	0.0309615	0.0734586	Isa	147	CADAFUAG00000453	AFUA_6G04340	Afu6G04340	Putative uncharacterized protein [Source:UniProtKB/TrEMBL
CADAFUAG00000454	59.1191	0.363359	0.389605	0.932635	0.351009	0.466808	Itra	147	CADAFUAG00000454	AFUA_6G04350	Afu6G04350	Putative uncharacterized protein [Source:UniProtKB/TrEMBL
CADAFUAG00000454	59.1191	0.329512	0.337138	0.97738	0.328381	0.484583	Isa	147	CADAFUAG00000454	AFUA_6G04350	Afu6G04350	Putative uncharacterized protein [Source:UniProtKB/TrEMBL
CADAFUAG00000455	447.462	-0.611124	0.160425	-3.8094	0.000139306	0.000453044	Itra	147	CADAFUAG00000455	AFUA_6G03730	Afu6G03730	2-methylcitrate dehydratase; putative [Source:UniProtKB/TrEMBL
CADAFUAG00000455	447.462	-0.439967	0.14724	-2.98809	0.00280727	0.00902068	Isa	147	CADAFUAG00000455	AFUA_6G03730	Afu6G03730	2-methylcitrate dehydratase; putative [Source:UniProtKB/TrEMBL
CADAFUAG00000456	2104.13	1.2259	0.109734	11.1715	5.62397e-29	1.08138e-27	Itra	147	CADAFUAG00000456	AFUA_6G02920	Afu6G02920	SNARE protein Snc2; putative [Source:UniProtKB/TrEMBL
CADAFUAG00000456	2104.13	0.705051	0.103166	6.83413	8.25043e-12	8.4251e-11	Isa	147	CADAFUAG00000456	AFUA_6G02920	Afu6G02920	SNARE protein Snc2; putative [Source:UniProtKB/TrEMBL
CADAFUAG00000457	3955	0.958779	0.114344	8.38501	5.07213e-17	5.48522e-16	Itra	147	CADAFUAG00000457	AFUA_6G05120	Afu6G05120	Glycogen synthase kinase (Skp1); putative [Source:UniProtKB/TrEMBL
CADAFUAG00000457	3955	-0.106176	0.110899	-0.957408	0.338361	0.494801	Isa	147	CADAFUAG00000457	AFUA_6G05120	Afu6G05120	Glycogen synthase kinase (Skp1); putative [Source:UniProtKB/TrEMBL
CADAFUAG00000458	891.918	-0.305581	0.12953	-2.35916	0.0183164	0.0381397	Itra	147	CADAFUAG00000458	AFUA_6G05320	Afu6G05320	Purine nucleoside phosphorylase [Source:UniProtKB/TrEMBL
CADAFUAG00000458	891.918	-0.334731	0.116395	-2.87582	0.0040298	0.0124251	Isa	147	CADAFUAG00000458	AFUA_6G05320	Afu6G05320	Purine nucleoside phosphorylase [Source:UniProtKB/TrEMBL
CADAFUAG00000459	1286.56	-0.1703	0.126505	-1.34619	0.17824	0.270106	Itra	147	CADAFUAG00000459	AFUA_6G02220	Afu6G02220	MFS toxin efflux pump; putative [Source:UniProtKB/TrEMBL
CADAFUAG00000459	1286.56	-0.653287	0.118028	-5.53503	3.11171e-08	2.15397e-07	Isa	147	CADAFUAG00000459	AFUA_6G02220	Afu6G02220	MFS toxin efflux pump; putative [Source:UniProtKB/TrEMBL
CADAFUAG00000460	312.312	0.916264	0.18578	4.93198	8.13999e-07	3.60627e-06	Itra	147	CADAFUAG00000460	AFUA_6G03530	Afu6G03530	Glutamine synthetase; putative [Source:UniProtKB/TrEMBL
CADAFUAG00000460	312.312	0.177041	0.154997	1.14222	0.253362	0.400538	Isa	147	CADAFUAG00000460	AFUA_6G03530	Afu6G03530	Glutamine synthetase; putative [Source:UniProtKB/TrEMBL
CADAFUAG00000461	529.718	0.197914	0.157218	1.25885	0.208084	0.306532	Itra	147	CADAFUAG00000461	AFUA_6G03960	Afu6G03960	COPII coat assembly protein sec16 [Source:UniProtKB/Swiss-Prot
CADAFUAG00000461	529.718	0.130687	0.129669	1.00785	0.313527	0.468842	Isa	147	CADAFUAG00000461	AFUA_6G03960	Afu6G03960	COPII coat assembly protein sec16 [Source:UniProtKB/Swiss-Prot
CADAFUAG00000462	721.467	0.908637	0.135077	6.72681	1.73426e-11	1.24511e-10	Itra	147	CADAFUAG00000462	AFUA_6G03470	Afu6G03470	ABC multidrug transporter; putative [Source:UniProtKB/TrEMBL
CADAFUAG00000462	721.467	0.206452	0.125449	1.64571	0.0998238	0.193958	Isa	147	CADAFUAG00000462	AFUA_6G03470	Afu6G03470	ABC multidrug transporter; putative [Source:UniProtKB/TrEMBL
CADAFUAG00000463	623.109	-0.804125	0.154936	-5.19006	2.10224e-07	1.00442e-06	Itra	147	CADAFUAG00000463	AFUA_6G03830	Afu6G03830	Ribosomal protein L14 [Source:UniProtKB/TrEMBL
CADAFUAG00000463	623.109	-0.565985	0.142412	-3.97428	7.0592e-05	0.000308932	Isa	147	CADAFUAG00000463	AFUA_6G03830	Afu6G03830	Ribosomal protein L14 [Source:UniProtKB/TrEMBL
CADAFUAG00000464	72.1743	-0.781494	0.336948	-2.31933	0.020377	0.0418627	Itra	147	CADAFUAG00000464	AFUA_6G03160	Afu6G03160	NACHT domain protein [Source:UniProtKB/TrEMBL
CADAFUAG00000464	72.1743	-0.18842	0.286642	-0.657336	0.510965	0.660503	Isa	147	CADAFUAG00000464	AFUA_6G03160	Afu6G03160	NACHT domain protein [Source:UniProtKB/TrEMBL
CADAFUAG00000465	68.3827	-0.620343	0.332325	-1.86668	0.0619469	0.110598	Itra	147	CADAFUAG00000465	AFUA_6G04660	Afu6G04660	Centromere protein Cse4; putative [Source:UniProtKB/TrEMBL
CADAFUAG00000465	68.3827	0.138148	0.277723	0.497432	0.618885	0.75168	Isa	147	CADAFUAG00000465	AFUA_6G04660	Afu6G04660	Centromere protein Cse4; putative [Source:UniProtKB/TrEMBL
CADAFUAG00000466	16.2191	-3.33896	0.890632	-3.74897	0.00017756	0.000568444	Itra	147	CADAFUAG00000466	AFUA_6G03345	Afu6G03345	Putative uncharacterized protein [Source:UniProtKB/TrEMBL
CADAFUAG00000466	16.2191	-0.471758	0.664137	-0.710333	0.477498	0.631494	Isa	147	CADAFUAG00000466	AFUA_6G03345	Afu6G03345	Putative uncharacterized protein [Source:UniProtKB/TrEMBL
CADAFUAG00000467	2228.93	-1.00466	0.107188	-9.37293	7.05495e-21	9.73769e-20	Itra	147	CADAFUAG00000467	AFUA_6G02535	Afu6G02535	Putative uncharacterized protein [Source:UniProtKB/TrEMBL		DMSO down
CADAFUAG00000467	2228.93	-0.202828	0.103291	-1.96365	0.0495702	0.109315	Isa	147	CADAFUAG00000467	AFUA_6G02535	Afu6G02535	Putative uncharacterized protein [Source:UniProtKB/TrEMBL		DMSO down
CADAFUAG00000468	450.025	-0.0854675	0.156942	-0.54458	0.586042	0.686064	Itra	147	CADAFUAG00000468	AFUA_6G02960	Afu6G02960	NADH-ubiquinone oxidoreductase 105 kDa subunit [Source:UniProtKB/TrEMBL
CADAFUAG00000468	450.025	-0.0455949	0.145247	-0.313914	0.753587	0.848779	Isa	147	CADAFUAG00000468	AFUA_6G02960	Afu6G02960	NADH-ubiquinone oxidoreductase 105 kDa subunit [Source:UniProtKB/TrEMBL
CADAFUAG00000469	346.574	0.502644	0.172256	2.918	0.00352282	0.00877776	Itra	147	CADAFUAG00000469	AFUA_6G03040	Afu6G03040	MFS multidrug transporter; putative [Source:UniProtKB/TrEMBL
CADAFUAG00000469	346.574	0.53137	0.16048	3.31114	0.000929174	0.00331722	Isa	147	CADAFUAG00000469	AFUA_6G03040	Afu6G03040	MFS multidrug transporter; putative [Source:UniProtKB/TrEMBL
CADAFUAG00000470	33534.7	0.53272	0.0968237	5.50196	3.75595e-08	1.96345e-07	Itra	147	CADAFUAG00000470	AFUA_6G02280	Afu6G02280	Putative peroxiredoxin pmp20 [Source:UniProtKB/Swiss-Prot
CADAFUAG00000470	33534.7	-0.409197	0.0964934	-4.24067	2.22853e-05	0.000106565	Isa	147	CADAFUAG00000470	AFUA_6G02280	Afu6G02280	Putative peroxiredoxin pmp20 [Source:UniProtKB/Swiss-Prot
CADAFUAG00000471	287.552	-0.160681	0.18244	-0.880732	0.378463	0.494064	Itra	147	CADAFUAG00000471	AFUA_6G02660	Afu6G02660	Putative uncharacterized protein [Source:UniProtKB/TrEMBL
CADAFUAG00000471	287.552	-0.446117	0.170938	-2.60982	0.00905903	0.0252916	Isa	147	CADAFUAG00000471	AFUA_6G02660	Afu6G02660	Putative uncharacterized protein [Source:UniProtKB/TrEMBL
CADAFUAG00000472	1805.45	1.85826	0.120167	15.464	6.0705e-54	2.83721e-52	Itra	147	CADAFUAG00000472	AFUA_6G04680	Afu6G04680	MIPC synthase subunit (SurA); putative [Source:UniProtKB/TrEMBL
CADAFUAG00000472	1805.45	0.899487	0.112968	7.96235	1.68805e-15	2.37321e-14	Isa	147	CADAFUAG00000472	AFUA_6G04680	Afu6G04680	MIPC synthase subunit (SurA); putative [Source:UniProtKB/TrEMBL
CADAFUAG00000473	20.3228	0.361389	0.633408	0.570548	0.568306	0.671176	Itra	147	CADAFUAG00000473	AFUA_6G01980	Afu6G01980	Haemolysin-III family protein [Source:UniProtKB/TrEMBL
CADAFUAG00000473	20.3228	0.270556	0.53733	0.50352	0.614599	0.747777	Isa	147	CADAFUAG00000473	AFUA_6G01980	Afu6G01980	Haemolysin-III family protein [Source:UniProtKB/TrEMBL
CADAFUAG00000474	1085.09	0.339465	0.122452	2.77223	0.00556731	0.0132665	Itra	147	CADAFUAG00000474	AFUA_6G02190	Afu6G02190	Transcriptional activator (PtaC); putative [Source:UniProtKB/TrEMBL
CADAFUAG00000474	1085.09	-0.103386	0.110512	-0.935518	0.349522	0.506709	Isa	147	CADAFUAG00000474	AFUA_6G02190	Afu6G02190	Transcriptional activator (PtaC); putative [Source:UniProtKB/TrEMBL
CADAFUAG00000475	519.054	1.07224	0.155575	6.89208	5.49827e-12	4.0745e-11	Itra	147	CADAFUAG00000475	AFUA_6G02180	Afu6G02180	GNAT family acetyltransferase; putative [Source:UniProtKB/TrEMBL
CADAFUAG00000475	519.054	-0.290116	0.131697	-2.2029	0.0276018	0.0665495	Isa	147	CADAFUAG00000475	AFUA_6G02180	Afu6G02180	GNAT family acetyltransferase; putative [Source:UniProtKB/TrEMBL
CADAFUAG00000476	27.3383	0.885667	0.585569	1.51249	0.130409	0.208501	Itra	147	CADAFUAG00000476	AFUA_6G03140	Afu6G03140	Oligopeptide transporter; putative [Source:UniProtKB/TrEMBL
CADAFUAG00000476	27.3383	-0.229019	0.448357	-0.510797	0.609493	0.744262	Isa	147	CADAFUAG00000476	AFUA_6G03140	Afu6G03140	Oligopeptide transporter; putative [Source:UniProtKB/TrEMBL
CADAFUAG00000477	461.214	0.992116	0.168513	5.88746	3.92181e-09	2.23586e-08	Itra	147	CADAFUAG00000477	AFUA_6G03460	Afu6G03460	Putative uncharacterized protein [Source:UniProtKB/TrEMBL
CADAFUAG00000477	461.214	1.23378	0.151555	8.14081	3.92649e-16	5.74281e-15	Isa	147	CADAFUAG00000477	AFUA_6G03460	Afu6G03460	Putative uncharacterized protein [Source:UniProtKB/TrEMBL
CADAFUAG00000478	33.8071	0.100422	0.497821	0.201724	0.840133	0.888675	Itra	147	CADAFUAG00000478	AFUA_6G04170	Afu6G04170	Killer toxin sensitivity protein (Iki1); putative [Source:UniProtKB/TrEMBL
CADAFUAG00000478	33.8071	0.0939927	0.39897	0.235588	0.813752	0.890965	Isa	147	CADAFUAG00000478	AFUA_6G04170	Afu6G04170	Killer toxin sensitivity protein (Iki1); putative [Source:UniProtKB/TrEMBL
CADAFUAG00000479	19.058	-0.0900913	0.660957	-0.136304	0.891581	0.927334	Itra	147	CADAFUAG00000479	AFUA_6G03870	Afu6G03870	Tetratricopeptide repeat protein [Source:UniProtKB/TrEMBL
CADAFUAG00000479	19.058	1.05274	0.520448	2.02276	0.0430984	0.097218	Isa	147	CADAFUAG00000479	AFUA_6G03870	Afu6G03870	Tetratricopeptide repeat protein [Source:UniProtKB/TrEMBL
CADAFUAG00000480	132.761	-0.769541	0.249503	-3.08429	0.00204037	0.00535532	Itra	147	CADAFUAG00000480	AFUA_6G05170	Afu6G05170	Mitochondrial folate carrier protein Flx1; putative [Source:UniProtKB/TrEMBL
CADAFUAG00000480	132.761	-0.290603	0.216092	-1.34482	0.178685	0.305374	Isa	147	CADAFUAG00000480	AFUA_6G05170	Afu6G05170	Mitochondrial folate carrier protein Flx1; putative [Source:UniProtKB/TrEMBL
CADAFUAG00000481	853.716	-1.05231	0.132583	-7.93701	2.07116e-15	2.00141e-14	Itra	147	CADAFUAG00000481	AFUA_6G05010	Afu6G05010	C6 transcription factor; putative [Source:UniProtKB/TrEMBL
CADAFUAG00000481	853.716	-0.609051	0.116583	-5.22418	1.74925e-07	1.1182e-06	Isa	147	CADAFUAG00000481	AFUA_6G05010	Afu6G05010	C6 transcription factor; putative [Source:UniProtKB/TrEMBL
CADAFUAG00000482	599.273	0.216855	0.143259	1.51373	0.130095	0.208139	Itra	147	CADAFUAG00000482	AFUA_6G05174	Afu6G05174	TOM complex component Tom7; putative [Source:UniProtKB/TrEMBL
CADAFUAG00000482	599.273	0.0530284	0.132276	0.400892	0.688499	0.80424	Isa	147	CADAFUAG00000482	AFUA_6G05174	Afu6G05174	TOM complex component Tom7; putative [Source:UniProtKB/TrEMBL
CADAFUAG00000483	662.062	-0.459237	0.146937	-3.12541	0.00177556	0.00472065	Itra	147	CADAFUAG00000483	AFUA_6G02100	Afu6G02100	DUF803 domain protein [Source:UniProtKB/TrEMBL
CADAFUAG00000483	662.062	-0.457487	0.124276	-3.68122	0.000232121	0.000930123	Isa	147	CADAFUAG00000483	AFUA_6G02100	Afu6G02100	DUF803 domain protein [Source:UniProtKB/TrEMBL
CADAFUAG00000484	24.7049	2.15076	0.538759	3.99207	6.54995e-05	0.000225851	Itra	147	CADAFUAG00000484	AFUA_6G01880	Afu6G01880	Putative uncharacterized protein [Source:UniProtKB/TrEMBL
CADAFUAG00000484	24.7049	1.21547	0.522242	2.32742	0.0199431	0.0501513	Isa	147	CADAFUAG00000484	AFUA_6G01880	Afu6G01880	Putative uncharacterized protein [Source:UniProtKB/TrEMBL
CADAFUAG00000485	717.041	-0.102479	0.136269	-0.752029	0.452034	0.566828	Itra	147	CADAFUAG00000485	AFUA_6G02120	Afu6G02120	Putative uncharacterized protein [Source:UniProtKB/TrEMBL
CADAFUAG00000485	717.041	-0.252312	0.120662	-2.09107	0.0365218	0.0844974	Isa	147	CADAFUAG00000485	AFUA_6G02120	Afu6G02120	Putative uncharacterized protein [Source:UniProtKB/TrEMBL
CADAFUAG00000486	7.63597	1.47862	1.0478	1.41116	0.158198	0.244804	Itra	147	CADAFUAG00000486	AFUA_6G03340	Afu6G03340	Putative uncharacterized protein [Source:UniProtKB/TrEMBL
CADAFUAG00000486	7.63597	-0.134826	0.944363	-0.142769	0.886473	0.935656	Isa	147	CADAFUAG00000486	AFUA_6G03340	Afu6G03340	Putative uncharacterized protein [Source:UniProtKB/TrEMBL
CADAFUAG00000487	457.214	-1.95781	0.180752	-10.8314	2.44307e-27	4.40172e-26	Itra	147	CADAFUAG00000487	AFUA_6G03660	Afu6G03660	Onanonoxo-7-onima-8-eninoihtemlysoneda [Source:UniProtKB/TrEMBL
CADAFUAG00000487	457.214	-0.775779	0.137602	-5.63786	1.72172e-08	1.24008e-07	Isa	147	CADAFUAG00000487	AFUA_6G03660	Afu6G03660	Onanonoxo-7-onima-8-eninoihtemlysoneda [Source:UniProtKB/TrEMBL
CADAFUAG00000488	346.846	-0.553924	0.1816	-3.05024	0.00228656	0.00593713	Itra	147	CADAFUAG00000488	AFUA_6G02700	Afu6G02700	Structural maintenance of chromosome complex subunit SmcA [Source:UniProtKB/TrEMBL
CADAFUAG00000488	346.846	0.0137933	0.158699	0.0869151	0.930739	0.960941	Isa	147	CADAFUAG00000488	AFUA_6G02700	Afu6G02700	Structural maintenance of chromosome complex subunit SmcA [Source:UniProtKB/TrEMBL
CADAFUAG00000489	571.242	-0.381672	0.149078	-2.56022	0.0104605	0.0232071	Itra	147	CADAFUAG00000489	AFUA_6G04820	Afu6G04820	Para-aminobenzoate synthase PabaA [Source:UniProtKB/TrEMBL
CADAFUAG00000489	571.242	-0.239893	0.135272	-1.7734	0.0761617	0.156217	Isa	147	CADAFUAG00000489	AFUA_6G04820	Afu6G04820	Para-aminobenzoate synthase PabaA [Source:UniProtKB/TrEMBL
CADAFUAG00000490	475.892	-0.491873	0.16067	-3.06138	0.00220318	0.00573958	Itra	147	CADAFUAG00000490	AFUA_6G04000	Afu6G04000	GTPase activating protein (Tsc2); putative [Source:UniProtKB/TrEMBL
CADAFUAG00000490	475.892	-0.0240828	0.13778	-0.174791	0.861244	0.920094	Isa	147	CADAFUAG00000490	AFUA_6G04000	Afu6G04000	GTPase activating protein (Tsc2); putative [Source:UniProtKB/TrEMBL
CADAFUAG00000491	1982.58	-0.933064	0.130939	-7.12595	1.03362e-12	8.15238e-12	Itra	147	CADAFUAG00000491	AFUA_6G04570	Afu6G04570	Translation elongation factor eEF-1 subunit gamma; putative [Source:UniProtKB/TrEMBL
CADAFUAG00000491	1982.58	0.187146	0.120119	1.55801	0.119231	0.223386	Isa	147	CADAFUAG00000491	AFUA_6G04570	Afu6G04570	Translation elongation factor eEF-1 subunit gamma; putative [Source:UniProtKB/TrEMBL
CADAFUAG00000492	202.116	-0.504508	0.203751	-2.4761	0.0132827	0.0286045	Itra	147	CADAFUAG00000492	AFUA_6G04140	Afu6G04140	Putative uncharacterized protein [Source:UniProtKB/TrEMBL
CADAFUAG00000492	202.116	-0.0657903	0.181246	-0.362989	0.716613	0.824441	Isa	147	CADAFUAG00000492	AFUA_6G04140	Afu6G04140	Putative uncharacterized protein [Source:UniProtKB/TrEMBL
CADAFUAG00000493	179.127	0.0397577	0.236973	0.167773	0.866762	0.908527	Itra	147	CADAFUAG00000493	AFUA_6G04490	Afu6G04490	Camp independent regulatory protein [Source:UniProtKB/TrEMBL
CADAFUAG00000493	179.127	0.175691	0.187166	0.938689	0.347891	0.505233	Isa	147	CADAFUAG00000493	AFUA_6G04490	Afu6G04490	Camp independent regulatory protein [Source:UniProtKB/TrEMBL
CADAFUAG00000494	90.1617	0.274342	0.294521	0.931485	0.351603	0.467401	Itra	147	CADAFUAG00000494	AFUA_6G05090	Afu6G05090	RNA polymerase II Elongator subunit; putative [Source:UniProtKB/TrEMBL
CADAFUAG00000494	90.1617	-0.153519	0.264301	-0.580848	0.561343	0.703786	Isa	147	CADAFUAG00000494	AFUA_6G05090	Afu6G05090	RNA polymerase II Elongator subunit; putative [Source:UniProtKB/TrEMBL
CADAFUAG00000495	265.023	-1.11898	0.20478	-5.4643	4.64741e-08	2.40682e-07	Itra	147	CADAFUAG00000495	AFUA_6G03520	Afu6G03520	Short-chain dehydrogenase/reductase family protein; putative [Source:UniProtKB/TrEMBL
CADAFUAG00000495	265.023	-0.755916	0.167558	-4.51136	6.44136e-06	3.35498e-05	Isa	147	CADAFUAG00000495	AFUA_6G03520	Afu6G03520	Short-chain dehydrogenase/reductase family protein; putative [Source:UniProtKB/TrEMBL
CADAFUAG00000496	1019.54	-0.0665256	0.13605	-0.488979	0.624857	0.719336	Itra	147	CADAFUAG00000496	AFUA_6G04230	Afu6G04230	RING finger protein [Source:UniProtKB/TrEMBL
CADAFUAG00000496	1019.54	0.0876516	0.124905	0.701747	0.482837	0.636575	Isa	147	CADAFUAG00000496	AFUA_6G04230	Afu6G04230	RING finger protein [Source:UniProtKB/TrEMBL
CADAFUAG00000497	92.6129	-0.2176	0.294217	-0.739591	0.459548	0.573661	Itra	147	CADAFUAG00000497	AFUA_6G02900	Afu6G02900	Rad21/Rec8 N terminal domain protein [Source:UniProtKB/TrEMBL
CADAFUAG00000497	92.6129	-0.900133	0.273954	-3.28571	0.00101727	0.00359634	Isa	147	CADAFUAG00000497	AFUA_6G02900	Afu6G02900	Rad21/Rec8 N terminal domain protein [Source:UniProtKB/TrEMBL
CADAFUAG00000498	130.181	0.0749781	0.264581	0.283385	0.776882	0.84032	Itra	147	CADAFUAG00000498	AFUA_6G04430	Afu6G04430	1;2-dihydroxy-3-keto-5-methylthiopentene dioxygenase [Source:UniProtKB/Swiss-Prot
CADAFUAG00000498	130.181	-0.192511	0.238696	-0.806514	0.419946	0.579732	Isa	147	CADAFUAG00000498	AFUA_6G04430	Afu6G04430	1;2-dihydroxy-3-keto-5-methylthiopentene dioxygenase [Source:UniProtKB/Swiss-Prot
CADAFUAG00000499	134.338	-1.08215	0.258088	-4.19295	2.75351e-05	9.9869e-05	Itra	147	CADAFUAG00000499	AFUA_6G02390	Afu6G02390	Thioesterase family protein [Source:UniProtKB/TrEMBL
CADAFUAG00000499	134.338	-0.351351	0.232906	-1.50855	0.131414	0.24152	Isa	147	CADAFUAG00000499	AFUA_6G02390	Afu6G02390	Thioesterase family protein [Source:UniProtKB/TrEMBL
CADAFUAG00000500	112.016	-0.12148	0.286093	-0.424619	0.671115	0.756356	Itra	147	CADAFUAG00000500	AFUA_6G01870	Afu6G01870	Putative uncharacterized protein [Source:UniProtKB/TrEMBL
CADAFUAG00000500	112.016	-1.29813	0.272976	-4.7555	1.97957e-06	1.10739e-05	Isa	147	CADAFUAG00000500	AFUA_6G01870	Afu6G01870	Putative uncharacterized protein [Source:UniProtKB/TrEMBL
CADAFUAG00000501	301.539	0.279454	0.427866	0.653135	0.513669	0.621437	Itra	147	CADAFUAG00000501	AFUA_6G02540	Afu6G02540	Actin associated protein Wsp1; putative [Source:UniProtKB/TrEMBL
CADAFUAG00000501	301.539	0.583934	0.416153	1.40317	0.160566	0.281138	Isa	147	CADAFUAG00000501	AFUA_6G02540	Afu6G02540	Actin associated protein Wsp1; putative [Source:UniProtKB/TrEMBL
CADAFUAG00000502	1502.26	-0.142247	0.124231	-1.14502	0.252202	0.358753	Itra	147	CADAFUAG00000502	AFUA_6G02630	Afu6G02630	ATP-dependent RNA helicase sub2 [Source:UniProtKB/Swiss-Prot
CADAFUAG00000502	1502.26	0.227792	0.117795	1.93381	0.0531371	0.115579	Isa	147	CADAFUAG00000502	AFUA_6G02630	Afu6G02630	ATP-dependent RNA helicase sub2 [Source:UniProtKB/Swiss-Prot
CADAFUAG00000503	4749.68	0.634358	0.124096	5.11184	3.19033e-07	1.4933e-06	Itra	147	CADAFUAG00000503	AFUA_6G05140	Afu6G05140	Sterol delta 5;6-desaturase ERG3 [Source:UniProtKB/TrEMBL
CADAFUAG00000503	4749.68	-0.00483814	0.120985	-0.0399896	0.968101	0.982402	Isa	147	CADAFUAG00000503	AFUA_6G05140	Afu6G05140	Sterol delta 5;6-desaturase ERG3 [Source:UniProtKB/TrEMBL
CADAFUAG00000504	1191.1	-0.201312	0.119289	-1.6876	0.0914879	0.154448	Itra	147	CADAFUAG00000504	AFUA_6G05210	Afu6G05210	Malate dehydrogenase; NAD-dependent [Source:UniProtKB/TrEMBL
CADAFUAG00000504	1191.1	-0.11876	0.109533	-1.08425	0.278256	0.430395	Isa	147	CADAFUAG00000504	AFUA_6G05210	Afu6G05210	Malate dehydrogenase; NAD-dependent [Source:UniProtKB/TrEMBL
CADAFUAG00000505	94.0737	-2.58489	0.328547	-7.86765	3.61365e-15	3.43569e-14	Itra	147	CADAFUAG00000505	AFUA_6G04640	Afu6G04640	Hydrolase; alpha/beta fold family; putative [Source:UniProtKB/TrEMBL
CADAFUAG00000505	94.0737	-0.412237	0.267651	-1.5402	0.123512	0.229697	Isa	147	CADAFUAG00000505	AFUA_6G04640	Afu6G04640	Hydrolase; alpha/beta fold family; putative [Source:UniProtKB/TrEMBL
CADAFUAG00000506	61.4747	-0.0341421	0.343447	-0.0994101	0.920813	0.946271	Itra	147	CADAFUAG00000506	AFUA_6G02800	Afu6G02800	Uncharacterized protein AFUA_6G02800 [Source:UniProtKB/Swiss-Prot
CADAFUAG00000506	61.4747	-0.00657443	0.286349	-0.0229595	0.981683	0.98921	Isa	147	CADAFUAG00000506	AFUA_6G02800	Afu6G02800	Uncharacterized protein AFUA_6G02800 [Source:UniProtKB/Swiss-Prot
CADAFUAG00000507	24540.8	0.910339	0.103338	8.8093	1.25933e-18	1.52427e-17	Itra	147	CADAFUAG00000507	AFUA_6G02020	Afu6G02020	G1/S-specific cyclin Pcl5; putative [Source:UniProtKB/TrEMBL
CADAFUAG00000507	24540.8	0.734584	0.102789	7.14652	8.9008e-13	9.75967e-12	Isa	147	CADAFUAG00000507	AFUA_6G02020	Afu6G02020	G1/S-specific cyclin Pcl5; putative [Source:UniProtKB/TrEMBL
CADAFUAG00000508	103.87	-6.43435	0.764688	-8.41435	3.95096e-17	4.31725e-16	Itra	147	CADAFUAG00000508	AFUA_6G03190	Afu6G03190	Putative uncharacterized protein [Source:UniProtKB/TrEMBL
CADAFUAG00000508	103.87	-4.39277	0.463083	-9.48593	2.40226e-21	4.87331e-20	Isa	147	CADAFUAG00000508	AFUA_6G03190	Afu6G03190	Putative uncharacterized protein [Source:UniProtKB/TrEMBL
CADAFUAG00000509	421.315	-0.053983	0.163505	-0.330162	0.741278	0.813706	Itra	147	CADAFUAG00000509	AFUA_6G04120	Afu6G04120	Short chain dehydrogenase/reductase family protein [Source:UniProtKB/TrEMBL
CADAFUAG00000509	421.315	0.341568	0.137111	2.49119	0.0127317	0.0339961	Isa	147	CADAFUAG00000509	AFUA_6G04120	Afu6G04120	Short chain dehydrogenase/reductase family protein [Source:UniProtKB/TrEMBL
CADAFUAG00000510	1842.84	1.35176	0.119781	11.2852	1.55274e-29	3.07971e-28	Itra	147	CADAFUAG00000510	AFUA_6G03940	Afu6G03940	GTPase activating protein (Gyp7); putative [Source:UniProtKB/TrEMBL
CADAFUAG00000510	1842.84	0.642384	0.113212	5.67417	1.39365e-08	1.01999e-07	Isa	147	CADAFUAG00000510	AFUA_6G03940	Afu6G03940	GTPase activating protein (Gyp7); putative [Source:UniProtKB/TrEMBL
CADAFUAG00000511	2060.25	0.036185	0.113041	0.320106	0.748888	0.819908	Itra	147	CADAFUAG00000511	AFUA_6G02690	Afu6G02690	C2H2 finger domain protein; putative [Source:UniProtKB/TrEMBL
CADAFUAG00000511	2060.25	0.0485508	0.107737	0.450641	0.652248	0.775379	Isa	147	CADAFUAG00000511	AFUA_6G02690	Afu6G02690	C2H2 finger domain protein; putative [Source:UniProtKB/TrEMBL
CADAFUAG00000512	135.787	-1.21513	0.281318	-4.3194	1.56451e-05	5.90112e-05	Itra	147	CADAFUAG00000512	AFUA_6G01930	Afu6G01930	MFS transporter Seo1; putative [Source:UniProtKB/TrEMBL
CADAFUAG00000512	135.787	-0.890295	0.235035	-3.78793	0.000151908	0.000629282	Isa	147	CADAFUAG00000512	AFUA_6G01930	Afu6G01930	MFS transporter Seo1; putative [Source:UniProtKB/TrEMBL
CADAFUAG00000513	16.9384	-0.253397	0.67443	-0.37572	0.707125	0.784511	Itra	147	CADAFUAG00000513	AFUA_6G03120	Afu6G03120	Putative uncharacterized protein [Source:UniProtKB/TrEMBL
CADAFUAG00000513	16.9384	0.279205	0.540132	0.516921	0.605212	0.741129	Isa	147	CADAFUAG00000513	AFUA_6G03120	Afu6G03120	Putative uncharacterized protein [Source:UniProtKB/TrEMBL
CADAFUAG00000514	623.76	-1.23936	0.19551	-6.33914	2.31054e-10	1.5044e-09	Itra	147	CADAFUAG00000514	AFUA_6G02440	Afu6G02440	60S ribosomal protein L24a [Source:UniProtKB/TrEMBL
CADAFUAG00000514	623.76	-0.852339	0.182883	-4.66058	3.1532e-06	1.72456e-05	Isa	147	CADAFUAG00000514	AFUA_6G02440	Afu6G02440	60S ribosomal protein L24a [Source:UniProtKB/TrEMBL
CADAFUAG00000515	85.4634	-1.48672	0.334995	-4.43805	9.07779e-06	3.53624e-05	Itra	147	CADAFUAG00000515	AFUA_6G04420	Afu6G04420	Maintenance of mitochondrial morphology protein 1 [Source:UniProtKB/Swiss-Prot
CADAFUAG00000515	85.4634	-0.404142	0.261058	-1.54809	0.1216	0.226747	Isa	147	CADAFUAG00000515	AFUA_6G04420	Afu6G04420	Maintenance of mitochondrial morphology protein 1 [Source:UniProtKB/Swiss-Prot
CADAFUAG00000516	105.338	-0.542291	0.330335	-1.64164	0.100664	0.167821	Itra	147	CADAFUAG00000516	AFUA_6G04070	Afu6G04070	Putative uncharacterized protein [Source:UniProtKB/TrEMBL
CADAFUAG00000516	105.338	0.135978	0.228448	0.595223	0.551695	0.695505	Isa	147	CADAFUAG00000516	AFUA_6G04070	Afu6G04070	Putative uncharacterized protein [Source:UniProtKB/TrEMBL
CADAFUAG00000517	456.813	0.640368	0.151989	4.21326	2.51716e-05	9.18258e-05	Itra	147	CADAFUAG00000517	AFUA_6G02370	Afu6G02370	ARP2/3 complex 20 kDa subunit (P20-ARC); putative [Source:UniProtKB/TrEMBL
CADAFUAG00000517	456.813	0.2774	0.136064	2.03874	0.0414759	0.0941672	Isa	147	CADAFUAG00000517	AFUA_6G02370	Afu6G02370	ARP2/3 complex 20 kDa subunit (P20-ARC); putative [Source:UniProtKB/TrEMBL
CADAFUAG00000518	335.087	1.38131	0.173146	7.97776	1.49014e-15	1.45035e-14	Itra	147	CADAFUAG00000518	AFUA_6G04270	Afu6G04270	MFS sugar transporter; putative [Source:UniProtKB/TrEMBL
CADAFUAG00000518	335.087	-0.97618	0.14907	-6.54847	5.81291e-11	5.51953e-10	Isa	147	CADAFUAG00000518	AFUA_6G04270	Afu6G04270	MFS sugar transporter; putative [Source:UniProtKB/TrEMBL
CADAFUAG00000519	449.151	4.93473	0.272579	18.1039	2.97052e-73	2.29875e-71	Itra	147	CADAFUAG00000519	AFUA_6G03680	Afu6G03680	Putative uncharacterized protein [Source:UniProtKB/TrEMBL
CADAFUAG00000519	449.151	3.95456	0.212917	18.5732	5.29158e-77	1.1996e-74	Isa	147	CADAFUAG00000519	AFUA_6G03680	Afu6G03680	Putative uncharacterized protein [Source:UniProtKB/TrEMBL
CADAFUAG00000520	128.126	0.467868	0.25756	1.81654	0.0692876	0.121679	Itra	147	CADAFUAG00000520	AFUA_6G02570	Afu6G02570	tRNA (uracil-O(2)-)-methyltransferase [Source:UniProtKB/Swiss-Prot
CADAFUAG00000520	128.126	0.0720495	0.204586	0.352172	0.724709	0.829742	Isa	147	CADAFUAG00000520	AFUA_6G02570	Afu6G02570	tRNA (uracil-O(2)-)-methyltransferase [Source:UniProtKB/Swiss-Prot
CADAFUAG00000521	4.21694	0.832314	1.30447	0.638048	0.523443	0.629401	Itra	147	CADAFUAG00000521	AFUA_6G02590	Afu6G02590	Protein kinase; putative [Source:UniProtKB/TrEMBL
CADAFUAG00000521	4.21694	0.377992	1.0607	0.356362	0.72157	0.827519	Isa	147	CADAFUAG00000521	AFUA_6G02590	Afu6G02590	Protein kinase; putative [Source:UniProtKB/TrEMBL
CADAFUAG00000522	231.461	-2.37181	0.257616	-9.20674	3.36191e-20	4.47039e-19	Itra	147	CADAFUAG00000522	AFUA_6G04730	Afu6G04730	Bifunctional purine biosynthetic protein Ade1; putative [Source:UniProtKB/TrEMBL
CADAFUAG00000522	231.461	-1.27836	0.176606	-7.23851	4.53634e-13	5.06595e-12	Isa	147	CADAFUAG00000522	AFUA_6G04730	Afu6G04730	Bifunctional purine biosynthetic protein Ade1; putative [Source:UniProtKB/TrEMBL
CADAFUAG00000523	86.8522	-1.21731	0.341916	-3.56026	0.000370481	0.0011207	Itra	147	CADAFUAG00000523	AFUA_6G04260	Afu6G04260	Ribosomal large subunit biogenesis protein MAK16; putative [Source:UniProtKB/TrEMBL
CADAFUAG00000523	86.8522	-0.012043	0.256101	-0.0470244	0.962494	0.979232	Isa	147	CADAFUAG00000523	AFUA_6G04260	Afu6G04260	Ribosomal large subunit biogenesis protein MAK16; putative [Source:UniProtKB/TrEMBL
CADAFUAG00000524	2343.68	-0.117321	0.118103	-0.99338	0.320525	0.435031	Itra	147	CADAFUAG00000524	AFUA_6G02070	Afu6G02070	Phospholipid-translocating P-type ATPase domain-containing protein [Source:UniProtKB/TrEMBL
CADAFUAG00000524	2343.68	0.797933	0.110342	7.23148	4.77755e-13	5.32877e-12	Isa	147	CADAFUAG00000524	AFUA_6G02070	Afu6G02070	Phospholipid-translocating P-type ATPase domain-containing protein [Source:UniProtKB/TrEMBL
CADAFUAG00000525	3138.64	0.350747	0.107888	3.25104	0.00114984	0.00319003	Itra	147	CADAFUAG00000525	AFUA_6G05350	Afu6G05350	Probable aspartic-type endopeptidase opsB [Source:UniProtKB/Swiss-Prot
CADAFUAG00000525	3138.64	0.647969	0.105428	6.14609	7.94146e-10	6.6989e-09	Isa	147	CADAFUAG00000525	AFUA_6G05350	Afu6G05350	Probable aspartic-type endopeptidase opsB [Source:UniProtKB/Swiss-Prot
CADAFUAG00000526	24.8269	-0.789633	0.733618	-1.07635	0.281769	0.392507	Itra	147	CADAFUAG00000526	AFUA_6G01820	Afu6G01820	MFS transporter; putative [Source:UniProtKB/TrEMBL
CADAFUAG00000526	24.8269	-1.30399	0.434967	-2.99791	0.00271841	0.00877557	Isa	147	CADAFUAG00000526	AFUA_6G01820	Afu6G01820	MFS transporter; putative [Source:UniProtKB/TrEMBL
CADAFUAG00000527	1427.51	-2.32783	0.380104	-6.12421	9.11339e-10	5.6235e-09	Itra	147	CADAFUAG00000527	AFUA_6G03620	Afu6G03620	FAD/FMN-containing isoamyl alcohol oxidase MreA [Source:UniProtKB/TrEMBL
CADAFUAG00000527	1427.51	-0.251602	0.371925	-0.676486	0.498732	0.650533	Isa	147	CADAFUAG00000527	AFUA_6G03620	Afu6G03620	FAD/FMN-containing isoamyl alcohol oxidase MreA [Source:UniProtKB/TrEMBL
CADAFUAG00000528	503.702	-0.516974	0.161004	-3.21094	0.001323	0.00361204	Itra	147	CADAFUAG00000528	AFUA_6G05300	Afu6G05300	CCAAT-binding factor complex subunit HapE [Source:UniProtKB/TrEMBL
CADAFUAG00000528	503.702	-0.000244838	0.142329	-0.00172022	0.998627	0.999077	Isa	147	CADAFUAG00000528	AFUA_6G05300	Afu6G05300	CCAAT-binding factor complex subunit HapE [Source:UniProtKB/TrEMBL
CADAFUAG00000529	2574.85	-3.71868	0.156654	-23.7382	1.45496e-124	3.61481e-122	Itra	147	CADAFUAG00000529	AFUA_6G04360	Afu6G04360	ABC drug exporter AtrF [Source:UniProtKB/TrEMBL
CADAFUAG00000529	2574.85	-0.497931	0.10713	-4.64791	3.35323e-06	1.82297e-05	Isa	147	CADAFUAG00000529	AFUA_6G04360	Afu6G04360	ABC drug exporter AtrF [Source:UniProtKB/TrEMBL
CADAFUAG00000530	75.8782	-0.440334	0.352484	-1.24923	0.211581	0.310852	Itra	147	CADAFUAG00000530	AFUA_6G02490	Afu6G02490	Aspartate aminotransferase [Source:UniProtKB/TrEMBL
CADAFUAG00000530	75.8782	0.564588	0.282274	2.00014	0.0454852	0.101491	Isa	147	CADAFUAG00000530	AFUA_6G02490	Afu6G02490	Aspartate aminotransferase [Source:UniProtKB/TrEMBL
CADAFUAG00000531	645.439	0.133002	0.14799	0.898723	0.3688	0.484329	Itra	147	CADAFUAG00000531	AFUA_6G04980	Afu6G04980	Cytochrome c mitochondrial import factor (Cyc2); putative [Source:UniProtKB/TrEMBL
CADAFUAG00000531	645.439	-0.755498	0.135181	-5.5888	2.28643e-08	1.61979e-07	Isa	147	CADAFUAG00000531	AFUA_6G04980	Afu6G04980	Cytochrome c mitochondrial import factor (Cyc2); putative [Source:UniProtKB/TrEMBL
CADAFUAG00000532	1.22762	3.29839	2.47224	1.33417	0.182149	0.274926	Itra	147	CADAFUAG00000532	AFUA_6G03290	Afu6G03290	Isochorismatase family hydrolase; putative [Source:UniProtKB/TrEMBL
CADAFUAG00000532	1.22762	1.4175	1.99588	0.710212	0.477572	NA	Isa	147	CADAFUAG00000532	AFUA_6G03290	Afu6G03290	Isochorismatase family hydrolase; putative [Source:UniProtKB/TrEMBL
CADAFUAG00000533	63.9259	-0.603953	0.35869	-1.68377	0.0922255	0.155538	Itra	147	CADAFUAG00000533	AFUA_6G05045	Afu6G05045	Putative uncharacterized protein [Source:UniProtKB/TrEMBL
CADAFUAG00000533	63.9259	-0.211312	0.296098	-0.713655	0.47544	0.629845	Isa	147	CADAFUAG00000533	AFUA_6G05045	Afu6G05045	Putative uncharacterized protein [Source:UniProtKB/TrEMBL
CADAFUAG00000534	25.7801	-0.0147082	0.507701	-0.0289703	0.976888	0.985024	Itra	147	CADAFUAG00000534	AFUA_6G05060	Afu6G05060	Decapping nuclease rai1 [Source:UniProtKB/Swiss-Prot
CADAFUAG00000534	25.7801	0.224159	0.441181	0.508089	0.611391	0.745733	Isa	147	CADAFUAG00000534	AFUA_6G05060	Afu6G05060	Decapping nuclease rai1 [Source:UniProtKB/Swiss-Prot
CADAFUAG00000535	217.01	-0.870636	0.222027	-3.92131	8.80692e-05	0.000297269	Itra	147	CADAFUAG00000535	AFUA_6G05250	Afu6G05250	Putative uncharacterized protein [Source:UniProtKB/TrEMBL
CADAFUAG00000535	217.01	-0.514265	0.198792	-2.58695	0.009683	0.0268108	Isa	147	CADAFUAG00000535	AFUA_6G05250	Afu6G05250	Putative uncharacterized protein [Source:UniProtKB/TrEMBL
CADAFUAG00000536	31.659	3.40449	0.568327	5.99036	2.09374e-09	1.23776e-08	Itra	147	CADAFUAG00000536	AFUA_6G03025	Afu6G03025	Putative uncharacterized protein [Source:UniProtKB/TrEMBL
CADAFUAG00000536	31.659	1.91315	0.478479	3.99841	6.37701e-05	0.000281532	Isa	147	CADAFUAG00000536	AFUA_6G03025	Afu6G03025	Putative uncharacterized protein [Source:UniProtKB/TrEMBL
CADAFUAG00000537	6513.18	-0.701484	0.104142	-6.73584	1.62991e-11	1.17286e-10	Itra	147	CADAFUAG00000537	AFUA_6G04920	Afu6G04920	NAD-dependent formate dehydrogenase AciA/Fdh [Source:UniProtKB/TrEMBL
CADAFUAG00000537	6513.18	-0.854947	0.100811	-8.48065	2.23943e-17	3.58151e-16	Isa	147	CADAFUAG00000537	AFUA_6G04920	Afu6G04920	NAD-dependent formate dehydrogenase AciA/Fdh [Source:UniProtKB/TrEMBL
CADAFUAG00000538	2.07287	-0.141881	2.17592	-0.0652051	0.948011	0.965186	Itra	147	CADAFUAG00000538	AFUA_6G03370	Afu6G03370	Short-chain dehydrogenase/reductase; putative [Source:UniProtKB/TrEMBL
CADAFUAG00000538	2.07287	-1.80843	1.7549	-1.0305	0.302775	NA	Isa	147	CADAFUAG00000538	AFUA_6G03370	Afu6G03370	Short-chain dehydrogenase/reductase; putative [Source:UniProtKB/TrEMBL
CADAFUAG00000539	101.271	-0.529524	0.30086	-1.76003	0.0784021	0.135443	Itra	147	CADAFUAG00000539	AFUA_6G01810	Afu6G01810	Cytochrome P450 oxidoreductase; putative [Source:UniProtKB/TrEMBL
CADAFUAG00000539	101.271	-0.591998	0.226644	-2.61202	0.0090009	0.0251448	Isa	147	CADAFUAG00000539	AFUA_6G01810	Afu6G01810	Cytochrome P450 oxidoreductase; putative [Source:UniProtKB/TrEMBL
CADAFUAG00000540	92.1606	0.462061	0.288126	1.60368	0.108786	0.178928	Itra	147	CADAFUAG00000540	AFUA_6G02160	Afu6G02160	3' exoribonuclease family protein [Source:UniProtKB/TrEMBL
CADAFUAG00000540	92.1606	-0.280705	0.262396	-1.06978	0.284719	0.437747	Isa	147	CADAFUAG00000540	AFUA_6G02160	Afu6G02160	3' exoribonuclease family protein [Source:UniProtKB/TrEMBL
CADAFUAG00000541	15.0228	-0.644949	0.789126	-0.817295	0.41376	0.529669	Itra	147	CADAFUAG00000541	AFUA_6G04450	Afu6G04450	Alpha-1;2-mannosyltransferase (Mnn2); putative [Source:UniProtKB/TrEMBL
CADAFUAG00000541	15.0228	-0.571136	0.541947	-1.05386	0.291947	0.445911	Isa	147	CADAFUAG00000541	AFUA_6G04450	Afu6G04450	Alpha-1;2-mannosyltransferase (Mnn2); putative [Source:UniProtKB/TrEMBL
CADAFUAG00000542	107.914	1.00479	0.28351	3.54411	0.000393943	0.00118749	Itra	147	CADAFUAG00000542	AFUA_6G03252	Afu6G03252	Protein kinase; putative [Source:UniProtKB/TrEMBL
CADAFUAG00000542	107.914	0.428965	0.229318	1.87062	0.0613984	0.130481	Isa	147	CADAFUAG00000542	AFUA_6G03252	Afu6G03252	Protein kinase; putative [Source:UniProtKB/TrEMBL
CADAFUAG00000543	294.587	0.613021	0.175598	3.49105	0.000481128	0.00142616	Itra	147	CADAFUAG00000543	AFUA_6G04760	Afu6G04760	UPF0220 domain protein [Source:UniProtKB/TrEMBL
CADAFUAG00000543	294.587	0.14776	0.166741	0.886167	0.375528	0.534246	Isa	147	CADAFUAG00000543	AFUA_6G04760	Afu6G04760	UPF0220 domain protein [Source:UniProtKB/TrEMBL
CADAFUAG00000544	69.979	-0.859873	0.346866	-2.47897	0.0131761	0.0283878	Itra	147	CADAFUAG00000544	AFUA_6G02820	Afu6G02820	Metalloreductase; putative [Source:UniProtKB/TrEMBL
CADAFUAG00000544	69.979	-0.430949	0.274178	-1.57179	0.116	0.218691	Isa	147	CADAFUAG00000544	AFUA_6G02820	Afu6G02820	Metalloreductase; putative [Source:UniProtKB/TrEMBL
CADAFUAG00000545	175.55	0.0260626	0.228397	0.114111	0.90915	0.938903	Itra	147	CADAFUAG00000545	AFUA_6G04940	Afu6G04940	Cytokinesis protein SepA/Bni1 [Source:UniProtKB/TrEMBL
CADAFUAG00000545	175.55	0.262153	0.187503	1.39813	0.162075	0.283074	Isa	147	CADAFUAG00000545	AFUA_6G04940	Afu6G04940	Cytokinesis protein SepA/Bni1 [Source:UniProtKB/TrEMBL
CADAFUAG00000546	278.73	-0.0434043	0.184573	-0.235161	0.814084	0.869037	Itra	147	CADAFUAG00000546	AFUA_6G03860	Afu6G03860	MFS transporter; putative [Source:UniProtKB/TrEMBL
CADAFUAG00000546	278.73	-0.155971	0.164331	-0.94913	0.342555	0.499403	Isa	147	CADAFUAG00000546	AFUA_6G03860	Afu6G03860	MFS transporter; putative [Source:UniProtKB/TrEMBL
CADAFUAG00000547	83.5905	-0.00883115	0.306188	-0.0288422	0.97699	0.985024	Itra	147	CADAFUAG00000547	AFUA_6G02080	Afu6G02080	Putative uncharacterized protein [Source:UniProtKB/TrEMBL
CADAFUAG00000547	83.5905	0.0416305	0.254355	0.163671	0.86999	0.925947	Isa	147	CADAFUAG00000547	AFUA_6G02080	Afu6G02080	Putative uncharacterized protein [Source:UniProtKB/TrEMBL
CADAFUAG00000548	366.236	0.611137	0.172281	3.54733	0.000389157	0.00117381	Itra	147	CADAFUAG00000548	AFUA_6G04265	Afu6G04265	Putative uncharacterized protein [Source:UniProtKB/TrEMBL
CADAFUAG00000548	366.236	0.284803	0.144187	1.97523	0.0482422	0.106776	Isa	147	CADAFUAG00000548	AFUA_6G04265	Afu6G04265	Putative uncharacterized protein [Source:UniProtKB/TrEMBL
CADAFUAG00000549	84.3993	-2.22899	0.39186	-5.68823	1.28361e-08	6.99687e-08	Itra	147	CADAFUAG00000549	AFUA_6G01840	Afu6G01840	C6 transcription factor; putative [Source:UniProtKB/TrEMBL
CADAFUAG00000549	84.3993	-0.992028	0.314424	-3.15506	0.00160463	0.00543344	Isa	147	CADAFUAG00000549	AFUA_6G01840	Afu6G01840	C6 transcription factor; putative [Source:UniProtKB/TrEMBL
CADAFUAG00000550	26.4153	0.479585	0.484961	0.988915	0.322705	0.437173	Itra	147	CADAFUAG00000550	AFUA_6G03130	Afu6G03130	Putative uncharacterized protein [Source:UniProtKB/TrEMBL
CADAFUAG00000550	26.4153	0.262823	0.471938	0.556901	0.577595	0.717287	Isa	147	CADAFUAG00000550	AFUA_6G03130	Afu6G03130	Putative uncharacterized protein [Source:UniProtKB/TrEMBL
CADAFUAG00000551	150.949	0.0764143	0.25487	0.299816	0.764317	0.831156	Itra	147	CADAFUAG00000551	AFUA_6G04700	Afu6G04700	Imidazoleglycerol-phosphate dehydratase [Source:UniProtKB/TrEMBL
CADAFUAG00000551	150.949	0.0685582	0.20979	0.326795	0.743823	0.842492	Isa	147	CADAFUAG00000551	AFUA_6G04700	Afu6G04700	Imidazoleglycerol-phosphate dehydratase [Source:UniProtKB/TrEMBL
CADAFUAG00000552	2733.44	1.47578	0.103156	14.3063	1.99792e-46	7.5149e-45	Itra	147	CADAFUAG00000552	AFUA_6G04300	Afu6G04300	Putative uncharacterized protein [Source:UniProtKB/TrEMBL
CADAFUAG00000552	2733.44	0.877091	0.0970845	9.03431	1.65045e-19	3.00527e-18	Isa	147	CADAFUAG00000552	AFUA_6G04300	Afu6G04300	Putative uncharacterized protein [Source:UniProtKB/TrEMBL
CADAFUAG00000553	195.666	-0.15004	0.210743	-0.711958	0.476491	0.589587	Itra	147	CADAFUAG00000553	AFUA_6G04150	Afu6G04150	Protein transport protein sec22 [Source:UniProtKB/TrEMBL
CADAFUAG00000553	195.666	-0.170424	0.189909	-0.897396	0.369507	0.527751	Isa	147	CADAFUAG00000553	AFUA_6G04150	Afu6G04150	Protein transport protein sec22 [Source:UniProtKB/TrEMBL
CADAFUAG00000554	492.892	-2.16036	0.187981	-11.4925	1.43933e-30	3.00636e-29	Itra	147	CADAFUAG00000554	AFUA_6G03540	Afu6G03540	Malate synthase [Source:UniProtKB/TrEMBL
CADAFUAG00000554	492.892	-1.00856	0.150736	-6.69089	2.2182e-11	2.16519e-10	Isa	147	CADAFUAG00000554	AFUA_6G03540	Afu6G03540	Malate synthase [Source:UniProtKB/TrEMBL
CADAFUAG00000555	124.762	-1.29575	0.281584	-4.60164	4.19173e-06	1.70431e-05	Itra	147	CADAFUAG00000555	AFUA_6G02740	Afu6G02740	Putative uncharacterized protein [Source:UniProtKB/TrEMBL
CADAFUAG00000555	124.762	-0.32745	0.219681	-1.49057	0.136074	0.247527	Isa	147	CADAFUAG00000555	AFUA_6G02740	Afu6G02740	Putative uncharacterized protein [Source:UniProtKB/TrEMBL
CADAFUAG00000556	68.3425	-0.00768374	0.339328	-0.022644	0.981934	0.988108	Itra	147	CADAFUAG00000556	AFUA_6G04100	Afu6G04100	Mis6 domain protein [Source:UniProtKB/TrEMBL
CADAFUAG00000556	68.3425	0.0565642	0.293495	0.192726	0.847173	0.91248	Isa	147	CADAFUAG00000556	AFUA_6G04100	Afu6G04100	Mis6 domain protein [Source:UniProtKB/TrEMBL
CADAFUAG00000557	306.796	-0.427249	0.191042	-2.23642	0.0253246	0.0509026	Itra	147	CADAFUAG00000557	AFUA_6G02930	Afu6G02930	Putative uncharacterized protein [Source:UniProtKB/TrEMBL
CADAFUAG00000557	306.796	-0.281668	0.178073	-1.58176	0.113705	0.215572	Isa	147	CADAFUAG00000557	AFUA_6G02930	Afu6G02930	Putative uncharacterized protein [Source:UniProtKB/TrEMBL
CADAFUAG00000558	158.431	3.51486	0.267784	13.1258	2.34442e-39	7.1399e-38	Itra	147	CADAFUAG00000558	AFUA_6G03480	Afu6G03480	Nonribosomal peptide synthase; putative [Source:UniProtKB/TrEMBL
CADAFUAG00000558	158.431	2.41732	0.253607	9.53175	1.54648e-21	3.16557e-20	Isa	147	CADAFUAG00000558	AFUA_6G03480	Afu6G03480	Nonribosomal peptide synthase; putative [Source:UniProtKB/TrEMBL
CADAFUAG00000559	9.63279	0.878733	0.837864	1.04878	0.294281	0.40666	Itra	147	CADAFUAG00000559	AFUA_6G02990	Afu6G02990	Short chain dehydrogenase/reductase; putative [Source:UniProtKB/TrEMBL
CADAFUAG00000559	9.63279	1.27288	0.744788	1.70905	0.0874421	0.174615	Isa	147	CADAFUAG00000559	AFUA_6G02990	Afu6G02990	Short chain dehydrogenase/reductase; putative [Source:UniProtKB/TrEMBL
CADAFUAG00000560	444.784	-0.544142	0.167453	-3.24953	0.00115597	0.00320327	Itra	147	CADAFUAG00000560	AFUA_6G02290	Afu6G02290	Putative uncharacterized protein [Source:UniProtKB/TrEMBL
CADAFUAG00000560	444.784	-0.0999233	0.151904	-0.657806	0.510663	0.660434	Isa	147	CADAFUAG00000560	AFUA_6G02290	Afu6G02290	Putative uncharacterized protein [Source:UniProtKB/TrEMBL
CADAFUAG00000561	2053.78	-0.384461	0.114669	-3.35278	0.000800045	0.00228125	Itra	147	CADAFUAG00000561	AFUA_6G02710	Afu6G02710	Lipase; putative [Source:UniProtKB/TrEMBL
CADAFUAG00000561	2053.78	0.747251	0.102211	7.31089	2.65373e-13	3.01554e-12	Isa	147	CADAFUAG00000561	AFUA_6G02710	Afu6G02710	Lipase; putative [Source:UniProtKB/TrEMBL
CADAFUAG00000562	1.05974	-2.55145	2.53303	-1.00727	0.313803	0.427432	Itra	147	CADAFUAG00000562	AFUA_6G03330	Afu6G03330	Putative uncharacterized protein [Source:UniProtKB/TrEMBL
CADAFUAG00000562	1.05974	0.34208	2.26786	0.150838	0.880103	NA	Isa	147	CADAFUAG00000562	AFUA_6G03330	Afu6G03330	Putative uncharacterized protein [Source:UniProtKB/TrEMBL
CADAFUAG00000563	10121.9	1.22268	0.105393	11.6012	4.06249e-31	8.61887e-30	Itra	147	CADAFUAG00000563	AFUA_6G03400	Afu6G03400	Putative uncharacterized protein [Source:UniProtKB/TrEMBL
CADAFUAG00000563	10121.9	0.211555	0.104556	2.02335	0.0430368	0.0971306	Isa	147	CADAFUAG00000563	AFUA_6G03400	Afu6G03400	Putative uncharacterized protein [Source:UniProtKB/TrEMBL
CADAFUAG00000564	187.646	0.335403	0.230239	1.45676	0.145183	0.227839	Itra	147	CADAFUAG00000564	AFUA_6G04180	Afu6G04180	Putative uncharacterized protein [Source:UniProtKB/TrEMBL
CADAFUAG00000564	187.646	0.173743	0.199719	0.869941	0.384333	0.544042	Isa	147	CADAFUAG00000564	AFUA_6G04180	Afu6G04180	Putative uncharacterized protein [Source:UniProtKB/TrEMBL
CADAFUAG00000565	62.9702	-0.544018	0.372026	-1.46231	0.143655	0.22574	Itra	147	CADAFUAG00000565	AFUA_6G02705	Afu6G02705	Putative uncharacterized protein [Source:UniProtKB/TrEMBL
CADAFUAG00000565	62.9702	-0.134608	0.321337	-0.418901	0.675289	0.793977	Isa	147	CADAFUAG00000565	AFUA_6G02705	Afu6G02705	Putative uncharacterized protein [Source:UniProtKB/TrEMBL
CADAFUAG00000566	535.217	0.0160956	0.147939	0.108799	0.913362	0.941587	Itra	147	CADAFUAG00000566	AFUA_6G05240	Afu6G05240	SUMO ligase SizA; putative [Source:UniProtKB/TrEMBL
CADAFUAG00000566	535.217	0.0905166	0.136083	0.665159	0.505949	0.656546	Isa	147	CADAFUAG00000566	AFUA_6G05240	Afu6G05240	SUMO ligase SizA; putative [Source:UniProtKB/TrEMBL
CADAFUAG00000567	416.944	-0.0471689	0.168065	-0.280658	0.778973	0.84174	Itra	147	CADAFUAG00000567	AFUA_6G04990	Afu6G04990	Amino acid transporter; putative [Source:UniProtKB/TrEMBL
CADAFUAG00000567	416.944	-0.368638	0.143269	-2.57306	0.0100805	0.0277168	Isa	147	CADAFUAG00000567	AFUA_6G04990	Afu6G04990	Amino acid transporter; putative [Source:UniProtKB/TrEMBL
CADAFUAG00000568	104.294	-0.467929	0.276089	-1.69485	0.0901042	0.15256	Itra	147	CADAFUAG00000568	AFUA_6G02650	Afu6G02650	Putative uncharacterized protein [Source:UniProtKB/TrEMBL
CADAFUAG00000568	104.294	0.145505	0.237426	0.612844	0.539979	0.685522	Isa	147	CADAFUAG00000568	AFUA_6G02650	Afu6G02650	Putative uncharacterized protein [Source:UniProtKB/TrEMBL
CADAFUAG00000569	82.293	1.86699	0.307659	6.06836	1.29221e-09	7.88608e-09	Itra	147	CADAFUAG00000569	AFUA_6G02210	Afu6G02210	Cytochrome P450 monooxygenase; putative [Source:UniProtKB/TrEMBL
CADAFUAG00000569	82.293	0.753828	0.270739	2.78433	0.00536381	0.0159303	Isa	147	CADAFUAG00000569	AFUA_6G02210	Afu6G02210	Cytochrome P450 monooxygenase; putative [Source:UniProtKB/TrEMBL
CADAFUAG00000570	402.604	-4.63812	0.27573	-16.8212	1.70532e-63	1.05228e-61	Itra	147	CADAFUAG00000570	AFUA_6G03350	Afu6G03350	GNAT family N-acetyltransferase; putative [Source:UniProtKB/TrEMBL
CADAFUAG00000570	402.604	-2.76593	0.167419	-16.5209	2.59301e-61	3.22102e-59	Isa	147	CADAFUAG00000570	AFUA_6G03350	Afu6G03350	GNAT family N-acetyltransferase; putative [Source:UniProtKB/TrEMBL
CADAFUAG00000571	409.593	0.189506	0.167211	1.13334	0.257073	0.364363	Itra	147	CADAFUAG00000571	AFUA_6G04830	Afu6G04830	HATPase_c domain protein; putative [Source:UniProtKB/TrEMBL
CADAFUAG00000571	409.593	0.640055	0.152039	4.20981	2.5559e-05	0.000120776	Isa	147	CADAFUAG00000571	AFUA_6G04830	Afu6G04830	HATPase_c domain protein; putative [Source:UniProtKB/TrEMBL
CADAFUAG00000572	5060.16	-0.326793	0.0966029	-3.38285	0.000717381	0.00206425	Itra	147	CADAFUAG00000572	AFUA_6G02130	Afu6G02130	Rab geranylgeranyl transferase escort protein; putative [Source:UniProtKB/TrEMBL
CADAFUAG00000572	5060.16	-0.878941	0.0945469	-9.29635	1.45351e-20	2.81634e-19	Isa	147	CADAFUAG00000572	AFUA_6G02130	Afu6G02130	Rab geranylgeranyl transferase escort protein; putative [Source:UniProtKB/TrEMBL
CADAFUAG00000573	4004.16	-0.399465	0.11474	-3.48147	0.000498677	0.00147402	Itra	147	CADAFUAG00000573
CADAFUAG00000573	4004.16	-0.65188	0.112229	-5.80848	6.30441e-09	4.80003e-08	Isa	147	CADAFUAG00000573
CADAFUAG00000574	49.2422	0.471725	0.427902	1.10241	0.270282	0.379552	Itra	147	CADAFUAG00000574	AFUA_6G03050	Afu6G03050	Oleate delta-12 desaturase [Source:UniProtKB/TrEMBL
CADAFUAG00000574	49.2422	-0.0439013	0.330637	-0.132778	0.894369	0.939399	Isa	147	CADAFUAG00000574	AFUA_6G03050	Afu6G03050	Oleate delta-12 desaturase [Source:UniProtKB/TrEMBL
CADAFUAG00000575	43.2674	-0.00217042	0.399099	-0.00543828	0.995661	0.997245	Itra	147	CADAFUAG00000575	AFUA_6G04900	Afu6G04900	Sucrase/ferredoxin-like family protein Fmi1; putative [Source:UniProtKB/TrEMBL
CADAFUAG00000575	43.2674	-0.169851	0.346936	-0.489576	0.624434	0.75589	Isa	147	CADAFUAG00000575	AFUA_6G04900	Afu6G04900	Sucrase/ferredoxin-like family protein Fmi1; putative [Source:UniProtKB/TrEMBL
CADAFUAG00000576	644.392	0.968258	0.133686	7.24277	4.39602e-13	3.54422e-12	Itra	147	CADAFUAG00000576	AFUA_6G03950	Afu6G03950	Phospholipid-translocating P-type ATPase; putative [Source:UniProtKB/TrEMBL
CADAFUAG00000576	644.392	0.400552	0.120406	3.32667	0.000878892	0.0031576	Isa	147	CADAFUAG00000576	AFUA_6G03950	Afu6G03950	Phospholipid-translocating P-type ATPase; putative [Source:UniProtKB/TrEMBL
CADAFUAG00000577	145.833	0.341848	0.256821	1.33108	0.183164	0.276194	Itra	147	CADAFUAG00000577	AFUA_6G03080	Afu6G03080	ABC multidrug transporter; putative [Source:UniProtKB/TrEMBL
CADAFUAG00000577	145.833	-0.189207	0.219768	-0.860938	0.389272	0.548721	Isa	147	CADAFUAG00000577	AFUA_6G03080	Afu6G03080	ABC multidrug transporter; putative [Source:UniProtKB/TrEMBL
CADAFUAG00000578	184.413	-1.16923	0.235707	-4.96053	7.02996e-07	3.14698e-06	Itra	147	CADAFUAG00000578	AFUA_6G03570	Afu6G03570	Probable beta-glucosidase E [Source:UniProtKB/Swiss-Prot
CADAFUAG00000578	184.413	-0.497699	0.192561	-2.58463	0.00974832	0.0269505	Isa	147	CADAFUAG00000578	AFUA_6G03570	Afu6G03570	Probable beta-glucosidase E [Source:UniProtKB/Swiss-Prot
CADAFUAG00000579	193.943	-0.352459	0.239804	-1.46978	0.141622	0.223028	Itra	147	CADAFUAG00000579	AFUA_6G01920	Afu6G01920	Xenobiotic compound monooxygenase; DszA family [Source:UniProtKB/TrEMBL
CADAFUAG00000579	193.943	1.034	0.199634	5.17948	2.22502e-07	1.40212e-06	Isa	147	CADAFUAG00000579	AFUA_6G01920	Afu6G01920	Xenobiotic compound monooxygenase; DszA family [Source:UniProtKB/TrEMBL
CADAFUAG00000580	145.498	-0.372788	0.236008	-1.57956	0.114209	0.186838	Itra	147	CADAFUAG00000580	AFUA_6G05040	Afu6G05040	DNA replication factor C subunit Rfc4; putative [Source:UniProtKB/TrEMBL
CADAFUAG00000580	145.498	-0.0115174	0.206757	-0.0557049	0.955577	0.975478	Isa	147	CADAFUAG00000580	AFUA_6G05040	Afu6G05040	DNA replication factor C subunit Rfc4; putative [Source:UniProtKB/TrEMBL
CADAFUAG00000581	1066.59	-0.643454	0.122669	-5.24545	1.55899e-07	7.59462e-07	Itra	147	CADAFUAG00000581	AFUA_6G04530	Afu6G04530	Enhancer of polycomb-like protein 1 [Source:UniProtKB/Swiss-Prot
CADAFUAG00000581	1066.59	-0.0393773	0.111693	-0.352548	0.724427	0.829537	Isa	147	CADAFUAG00000581	AFUA_6G04530	Afu6G04530	Enhancer of polycomb-like protein 1 [Source:UniProtKB/Swiss-Prot
CADAFUAG00000582	198.392	4.07259	0.281576	14.4636	2.05806e-47	8.02899e-46	Itra	147	CADAFUAG00000582	AFUA_6G03490	Afu6G03490	Phenol 2-monooxygenase; putative [Source:UniProtKB/TrEMBL
CADAFUAG00000582	198.392	2.89984	0.213428	13.587	4.78369e-42	2.79862e-40	Isa	147	CADAFUAG00000582	AFUA_6G03490	Afu6G03490	Phenol 2-monooxygenase; putative [Source:UniProtKB/TrEMBL
CADAFUAG00000583	271.915	-1.77195	0.188768	-9.3869	6.17937e-21	8.57933e-20	Itra	147	CADAFUAG00000583	AFUA_6G02340	Afu6G02340	Putative uncharacterized protein [Source:UniProtKB/TrEMBL
CADAFUAG00000583	271.915	-0.660726	0.18018	-3.66703	0.000245381	0.000978071	Isa	147	CADAFUAG00000583	AFUA_6G02340	Afu6G02340	Putative uncharacterized protein [Source:UniProtKB/TrEMBL
CADAFUAG00000584	28.7456	2.10807	0.537197	3.9242	8.70199e-05	0.000294148	Itra	147	CADAFUAG00000584	AFUA_6G03500	Afu6G03500	Putative uncharacterized protein [Source:UniProtKB/TrEMBL
CADAFUAG00000584	28.7456	0.0718956	0.41232	0.174368	0.861576	0.920241	Isa	147	CADAFUAG00000584	AFUA_6G03500	Afu6G03500	Putative uncharacterized protein [Source:UniProtKB/TrEMBL
CADAFUAG00000585	161.49	0.436921	0.292346	1.49453	0.135037	0.214854	Itra	147	CADAFUAG00000585	AFUA_6G05160	Afu6G05160	C2H2 transcription factor (Azf1); putative [Source:UniProtKB/TrEMBL
CADAFUAG00000585	161.49	-0.280056	0.207458	-1.34994	0.177035	0.303125	Isa	147	CADAFUAG00000585	AFUA_6G05160	Afu6G05160	C2H2 transcription factor (Azf1); putative [Source:UniProtKB/TrEMBL
CADAFUAG00000586	24.2452	-1.35746	0.574127	-2.3644	0.0180595	0.0376549	Itra	147	CADAFUAG00000586	AFUA_6G05030	Afu6G05030	Polysaccharide deacetylase family protein [Source:UniProtKB/TrEMBL
CADAFUAG00000586	24.2452	0.184741	0.486226	0.379949	0.703983	0.815254	Isa	147	CADAFUAG00000586	AFUA_6G05030	Afu6G05030	Polysaccharide deacetylase family protein [Source:UniProtKB/TrEMBL
CADAFUAG00000587	389.072	-0.868702	0.172349	-5.04037	4.64624e-07	2.12114e-06	Itra	147	CADAFUAG00000587	AFUA_6G02950	Afu6G02950	Aromatic ring-opening dioxygenase LigB subunit; putative [Source:UniProtKB/TrEMBL
CADAFUAG00000587	389.072	-1.1794	0.143503	-8.21866	2.05781e-16	3.07925e-15	Isa	147	CADAFUAG00000587	AFUA_6G02950	Afu6G02950	Aromatic ring-opening dioxygenase LigB subunit; putative [Source:UniProtKB/TrEMBL
CADAFUAG00000588	11.6228	-1.52623	0.830707	-1.83727	0.0661705	0.117032	Itra	147	CADAFUAG00000588	AFUA_6G03630	Afu6G03630	Very-long-chain acyl-CoA synthetase family protein (CefD1); putative [Source:UniProtKB/TrEMBL
CADAFUAG00000588	11.6228	0.327393	0.695302	0.470864	0.637738	0.764632	Isa	147	CADAFUAG00000588	AFUA_6G03630	Afu6G03630	Very-long-chain acyl-CoA synthetase family protein (CefD1); putative [Source:UniProtKB/TrEMBL
CADAFUAG00000589	30.2936	-0.245147	0.49279	-0.497467	0.61886	0.714611	Itra	147	CADAFUAG00000589	AFUA_6G01990	Afu6G01990	Pre-rRNA-processing protein ipi1 [Source:UniProtKB/Swiss-Prot
CADAFUAG00000589	30.2936	-0.623674	0.424508	-1.46917	0.141787	0.255662	Isa	147	CADAFUAG00000589	AFUA_6G01990	Afu6G01990	Pre-rRNA-processing protein ipi1 [Source:UniProtKB/Swiss-Prot
CADAFUAG00000590	241.051	-0.0441645	0.188152	-0.234728	0.81442	0.869298	Itra	147	CADAFUAG00000590	AFUA_6G02850	Afu6G02850	C6 finger domain protein; putative [Source:UniProtKB/TrEMBL
CADAFUAG00000590	241.051	-0.153813	0.167382	-0.918929	0.358133	0.515402	Isa	147	CADAFUAG00000590	AFUA_6G02850	Afu6G02850	C6 finger domain protein; putative [Source:UniProtKB/TrEMBL
CADAFUAG00000591	7.00438	0.614514	0.924543	0.664668	0.506263	0.61498	Itra	147	CADAFUAG00000591	AFUA_6G03220	Afu6G03220	Putative uncharacterized protein [Source:UniProtKB/TrEMBL
CADAFUAG00000591	7.00438	0.677645	0.924296	0.733147	0.463469	0.61896	Isa	147	CADAFUAG00000591	AFUA_6G03220	Afu6G03220	Putative uncharacterized protein [Source:UniProtKB/TrEMBL
CADAFUAG00000592	97.5747	-1.56539	0.29495	-5.30731	1.11258e-07	5.51673e-07	Itra	147	CADAFUAG00000592	AFUA_6G02760	Afu6G02760	UDP-glucose-4-epimerase; putative [Source:UniProtKB/TrEMBL
CADAFUAG00000592	97.5747	-0.984395	0.270851	-3.63445	0.000278573	0.00110118	Isa	147	CADAFUAG00000592	AFUA_6G02760	Afu6G02760	UDP-glucose-4-epimerase; putative [Source:UniProtKB/TrEMBL
CADAFUAG00000593	343.52	-0.613215	0.168761	-3.63363	0.000279462	0.00086335	Itra	147	CADAFUAG00000593	AFUA_6G04705	Afu6G04705	Putative uncharacterized protein [Source:UniProtKB/TrEMBL
CADAFUAG00000593	343.52	-0.057999	0.143693	-0.40363	0.686485	0.80292	Isa	147	CADAFUAG00000593	AFUA_6G04705	Afu6G04705	Putative uncharacterized protein [Source:UniProtKB/TrEMBL
CADAFUAG00000594	262.48	0.128131	0.189437	0.676379	0.4988	0.609129	Itra	147	CADAFUAG00000594	AFUA_6G05100	Afu6G05100	6-phosphofructo-2-kinase; putative [Source:UniProtKB/TrEMBL
CADAFUAG00000594	262.48	0.144785	0.162835	0.889152	0.373922	0.532834	Isa	147	CADAFUAG00000594	AFUA_6G05100	Afu6G05100	6-phosphofructo-2-kinase; putative [Source:UniProtKB/TrEMBL
CADAFUAG00000595	56.8521	0.925947	0.356024	2.6008	0.00930075	0.0208819	Itra	147	CADAFUAG00000595	AFUA_6G03180	Afu6G03180	Putative uncharacterized protein [Source:UniProtKB/TrEMBL
CADAFUAG00000595	56.8521	0.361937	0.328848	1.10062	0.271062	0.421755	Isa	147	CADAFUAG00000595	AFUA_6G03180	Afu6G03180	Putative uncharacterized protein [Source:UniProtKB/TrEMBL
CADAFUAG00000596	6.97594	-1.42532	1.08588	-1.3126	0.189318	0.284112	Itra	147	CADAFUAG00000596	AFUA_6G03360	Afu6G03360	ToxD-like zinc binding oxidoreductase; putative [Source:UniProtKB/TrEMBL
CADAFUAG00000596	6.97594	-0.420604	0.874627	-0.480895	0.630591	0.759921	Isa	147	CADAFUAG00000596	AFUA_6G03360	Afu6G03360	ToxD-like zinc binding oxidoreductase; putative [Source:UniProtKB/TrEMBL
CADAFUAG00000597	52.5029	-0.369192	0.395187	-0.934222	0.350189	0.46585	Itra	147	CADAFUAG00000597	AFUA_6G02350	Afu6G02350	DUF207 domain protein [Source:UniProtKB/TrEMBL
CADAFUAG00000597	52.5029	0.257656	0.325272	0.792126	0.428287	0.587446	Isa	147	CADAFUAG00000597	AFUA_6G02350	Afu6G02350	DUF207 domain protein [Source:UniProtKB/TrEMBL
CADAFUAG00000598	268.578	0.988739	0.198589	4.97881	6.39774e-07	2.87624e-06	Itra	147	CADAFUAG00000598	AFUA_6G04580	Afu6G04580	NIF domain protein [Source:UniProtKB/TrEMBL
CADAFUAG00000598	268.578	0.649179	0.168234	3.85879	0.000113951	0.000481056	Isa	147	CADAFUAG00000598	AFUA_6G04580	Afu6G04580	NIF domain protein [Source:UniProtKB/TrEMBL
CADAFUAG00000599	180.081	-0.416156	0.226084	-1.84071	0.0656641	0.116398	Itra	147	CADAFUAG00000599	AFUA_6G04950	Afu6G04950	Mitochondrial GTPase (Mss1); putative [Source:UniProtKB/TrEMBL
CADAFUAG00000599	180.081	0.00963751	0.192929	0.0499537	0.960159	0.977959	Isa	147	CADAFUAG00000599	AFUA_6G04950	Afu6G04950	Mitochondrial GTPase (Mss1); putative [Source:UniProtKB/TrEMBL
CADAFUAG00000600	1312.94	-1.48975	0.12292	-12.1197	8.3075e-34	2.00079e-32	Itra	147	CADAFUAG00000600	AFUA_6G03990	Afu6G03990	GAS2 domain protein [Source:UniProtKB/TrEMBL
CADAFUAG00000600	1312.94	-1.26729	0.105677	-11.9921	3.91064e-33	1.47757e-31	Isa	147	CADAFUAG00000600	AFUA_6G03990	Afu6G03990	GAS2 domain protein [Source:UniProtKB/TrEMBL
CADAFUAG00000601	453.788	-0.46932	0.163167	-2.87632	0.00402338	0.00991251	Itra	147	CADAFUAG00000601	AFUA_6G05270	Afu6G05270	Putative uncharacterized protein [Source:UniProtKB/TrEMBL
CADAFUAG00000601	453.788	-0.731381	0.154718	-4.72718	2.2766e-06	1.26807e-05	Isa	147	CADAFUAG00000601	AFUA_6G05270	Afu6G05270	Putative uncharacterized protein [Source:UniProtKB/TrEMBL
CADAFUAG00000602	537.778	-0.493686	0.160132	-3.083	0.00204928	0.00537723	Itra	147	CADAFUAG00000602	AFUA_6G02420	Afu6G02420	Ubiquitin conjugating enzyme (UbcM); putative [Source:UniProtKB/TrEMBL
CADAFUAG00000602	537.778	-0.0712589	0.141247	-0.5045	0.61391	0.74734	Isa	147	CADAFUAG00000602	AFUA_6G02420	Afu6G02420	Ubiquitin conjugating enzyme (UbcM); putative [Source:UniProtKB/TrEMBL
CADAFUAG00000603	300.102	3.33022	0.231401	14.3916	5.84498e-47	2.27088e-45	Itra	147	CADAFUAG00000603	AFUA_6G03230	Afu6G03230	Cell wall glucanase/allergen F16-like [Source:UniProtKB/TrEMBL
CADAFUAG00000603	300.102	2.50881	0.199026	12.6055	1.9703e-36	8.54864e-35	Isa	147	CADAFUAG00000603	AFUA_6G03230	Afu6G03230	Cell wall glucanase/allergen F16-like [Source:UniProtKB/TrEMBL
CADAFUAG00000604	111.112	1.01166	0.276356	3.66073	0.000251498	0.000782595	Itra	147	CADAFUAG00000604	AFUA_6G03110	Afu6G03110	C6 transcription factor; putative [Source:UniProtKB/TrEMBL
CADAFUAG00000604	111.112	0.387847	0.220401	1.75973	0.078453	0.160228	Isa	147	CADAFUAG00000604	AFUA_6G03110	Afu6G03110	C6 transcription factor; putative [Source:UniProtKB/TrEMBL
CADAFUAG00000605	541.727	0.402658	0.147002	2.73913	0.00616018	0.0145323	Itra	147	CADAFUAG00000605	AFUA_6G04250	Afu6G04250	Pheromone-dependent cell cycle arrest protein Far11; putative [Source:UniProtKB/TrEMBL
CADAFUAG00000605	541.727	-0.0161515	0.128581	-0.125613	0.900038	0.941728	Isa	147	CADAFUAG00000605	AFUA_6G04250	Afu6G04250	Pheromone-dependent cell cycle arrest protein Far11; putative [Source:UniProtKB/TrEMBL
CADAFUAG00000606	122.184	-0.221458	0.253886	-0.872273	0.383059	0.498479	Itra	147	CADAFUAG00000606	AFUA_6G03710	Afu6G03710	Amidohydrolase; putative [Source:UniProtKB/TrEMBL
CADAFUAG00000606	122.184	-0.423273	0.216495	-1.95512	0.0505687	0.111004	Isa	147	CADAFUAG00000606	AFUA_6G03710	Afu6G03710	Amidohydrolase; putative [Source:UniProtKB/TrEMBL
CADAFUAG00000607	9378.55	0.811589	0.0955001	8.4983	1.92381e-17	2.15198e-16	Itra	147	CADAFUAG00000607	AFUA_6G04740	Afu6G04740	Actin Act1 [Source:UniProtKB/TrEMBL
CADAFUAG00000607	9378.55	-0.0921519	0.0942226	-0.978024	0.328063	0.48427	Isa	147	CADAFUAG00000607	AFUA_6G04740	Afu6G04740	Actin Act1 [Source:UniProtKB/TrEMBL
CADAFUAG00000608	475.4	-0.463377	0.160214	-2.89224	0.00382502	0.00946827	Itra	147	CADAFUAG00000608	AFUA_6G05310	Afu6G05310	Nucleolus protein required for cell viability; putative [Source:UniProtKB/TrEMBL
CADAFUAG00000608	475.4	-0.35064	0.137886	-2.54296	0.0109917	0.02986	Isa	147	CADAFUAG00000608	AFUA_6G05310	Afu6G05310	Nucleolus protein required for cell viability; putative [Source:UniProtKB/TrEMBL
CADAFUAG00000609	91.3701	0.833049	0.280757	2.96715	0.00300574	0.0075814	Itra	147	CADAFUAG00000609	AFUA_6G02030	Afu6G02030	Aminotransferase; putative [Source:UniProtKB/TrEMBL
CADAFUAG00000609	91.3701	0.151349	0.249744	0.606018	0.544503	0.68941	Isa	147	CADAFUAG00000609	AFUA_6G02030	Afu6G02030	Aminotransferase; putative [Source:UniProtKB/TrEMBL
CADAFUAG00000610	238.708	-0.552987	0.193407	-2.85919	0.00424725	0.0104097	Itra	147	CADAFUAG00000610	AFUA_6G04040	Afu6G04040	Peroxisomal D3;D2-enoyl-CoA isomerase [Source:UniProtKB/TrEMBL
CADAFUAG00000610	238.708	-0.40255	0.178678	-2.25293	0.0242635	0.0595617	Isa	147	CADAFUAG00000610	AFUA_6G04040	Afu6G04040	Peroxisomal D3;D2-enoyl-CoA isomerase [Source:UniProtKB/TrEMBL
CADAFUAG00000611	0.54854	-0.724244	3.19929	-0.226377	0.820908	0.874309	Itra	147	CADAFUAG00000611
CADAFUAG00000611	0.54854	0.73176	2.8399	0.257671	0.796661	NA	Isa	147	CADAFUAG00000611
CADAFUAG00000612	728.643	0.593778	0.146403	4.05577	4.99688e-05	0.000174919	Itra	147	CADAFUAG00000612	AFUA_6G04790	Afu6G04790	Proteasome subunit alpha type [Source:UniProtKB/TrEMBL
CADAFUAG00000612	728.643	-0.310069	0.139222	-2.22715	0.0259369	0.063106	Isa	147	CADAFUAG00000612	AFUA_6G04790	Afu6G04790	Proteasome subunit alpha type [Source:UniProtKB/TrEMBL
CADAFUAG00000613	2388.62	-1.99294	0.118086	-16.8771	6.633e-64	4.26001e-62	Itra	147	CADAFUAG00000613	AFUA_6G01940	Afu6G01940	Dienelactone hydrolase family protein [Source:UniProtKB/TrEMBL
CADAFUAG00000613	2388.62	-0.896752	0.107	-8.38086	5.25428e-17	8.15852e-16	Isa	147	CADAFUAG00000613	AFUA_6G01940	Afu6G01940	Dienelactone hydrolase family protein [Source:UniProtKB/TrEMBL
CADAFUAG00000614	253.872	-0.125588	0.209671	-0.598975	0.54919	0.653257	Itra	147	CADAFUAG00000614	AFUA_6G02242	Afu6G02242	Serine/threonine-protein kinase; putative [Source:UniProtKB/TrEMBL
CADAFUAG00000614	253.872	0.655016	0.186686	3.50865	0.000450395	0.00171367	Isa	147	CADAFUAG00000614	AFUA_6G02242	Afu6G02242	Serine/threonine-protein kinase; putative [Source:UniProtKB/TrEMBL
CADAFUAG00000615	24.9294	0.683001	0.54485	1.25356	0.210003	0.308966	Itra	147	CADAFUAG00000615	AFUA_6G03920	Afu6G03920	Iron-sulfur cluster-binding protein; putative [Source:UniProtKB/TrEMBL
CADAFUAG00000615	24.9294	0.579878	0.454963	1.27456	0.202465	0.336502	Isa	147	CADAFUAG00000615	AFUA_6G03920	Afu6G03920	Iron-sulfur cluster-binding protein; putative [Source:UniProtKB/TrEMBL
CADAFUAG00000616	499.653	-2.11417	0.186905	-11.3114	1.1517e-29	2.31839e-28	Itra	147	CADAFUAG00000616	AFUA_6G02910	Afu6G02910	Acetylglutamate kinase; putative [Source:UniProtKB/TrEMBL
CADAFUAG00000616	499.653	-0.651637	0.140922	-4.62409	3.76238e-06	2.03564e-05	Isa	147	CADAFUAG00000616	AFUA_6G02910	Afu6G02910	Acetylglutamate kinase; putative [Source:UniProtKB/TrEMBL
CADAFUAG00000617	542.738	-1.42376	0.155242	-9.17121	4.67751e-20	6.14192e-19	Itra	147	CADAFUAG00000617	AFUA_6G05020	Afu6G05020	Acetamidase [Source:UniProtKB/TrEMBL
CADAFUAG00000617	542.738	-0.638999	0.128511	-4.97232	6.61555e-07	3.90304e-06	Isa	147	CADAFUAG00000617	AFUA_6G05020	Afu6G05020	Acetamidase [Source:UniProtKB/TrEMBL
CADAFUAG00000618	254.502	-0.0253101	0.197868	-0.127914	0.898217	0.932326	Itra	147	CADAFUAG00000618	AFUA_6G02000	Afu6G02000	NCS1 allantoate transporter [Source:UniProtKB/TrEMBL
CADAFUAG00000618	254.502	0.241691	0.170417	1.41824	0.156122	0.275217	Isa	147	CADAFUAG00000618	AFUA_6G02000	Afu6G02000	NCS1 allantoate transporter [Source:UniProtKB/TrEMBL
CADAFUAG00000619	540.581	0.0818656	0.159061	0.514682	0.606775	0.704771	Itra	147	CADAFUAG00000619	AFUA_6G04190	Afu6G04190	Putative uncharacterized protein [Source:UniProtKB/TrEMBL
CADAFUAG00000619	540.581	0.0975194	0.145546	0.670025	0.502842	0.654034	Isa	147	CADAFUAG00000619	AFUA_6G04190	Afu6G04190	Putative uncharacterized protein [Source:UniProtKB/TrEMBL
CADAFUAG00000620	122.078	-0.289597	0.249987	-1.15845	0.246681	0.352172	Itra	147	CADAFUAG00000620	AFUA_6G02480	Afu6G02480	Esterase; putative [Source:UniProtKB/TrEMBL
CADAFUAG00000620	122.078	-0.154052	0.233003	-0.661157	0.508511	0.658646	Isa	147	CADAFUAG00000620	AFUA_6G02480	Afu6G02480	Esterase; putative [Source:UniProtKB/TrEMBL
CADAFUAG00000621	2.874	-0.394552	1.48625	-0.265468	0.790649	0.851142	Itra	147	CADAFUAG00000621	AFUA_6G02845	Afu6G02845	Ethanolamine utilization protein (EutQ); putative [Source:UniProtKB/TrEMBL
CADAFUAG00000621	2.874	-0.713993	1.32242	-0.539916	0.589255	NA	Isa	147	CADAFUAG00000621	AFUA_6G02845	Afu6G02845	Ethanolamine utilization protein (EutQ); putative [Source:UniProtKB/TrEMBL
CADAFUAG00000622	290.355	-0.97563	0.203114	-4.80335	1.56031e-06	6.68371e-06	Itra	147	CADAFUAG00000622	AFUA_6G03790	Afu6G03790	Putative uncharacterized protein [Source:UniProtKB/TrEMBL
CADAFUAG00000622	290.355	0.882341	0.172622	5.11141	3.19755e-07	1.97247e-06	Isa	147	CADAFUAG00000622	AFUA_6G03790	Afu6G03790	Putative uncharacterized protein [Source:UniProtKB/TrEMBL
CADAFUAG00000623	55.5067	-1.07498	0.399918	-2.688	0.00718817	0.0166659	Itra	147	CADAFUAG00000623	AFUA_6G03700	Afu6G03700	Putative uncharacterized protein [Source:UniProtKB/TrEMBL
CADAFUAG00000623	55.5067	-0.147738	0.344561	-0.428772	0.668089	0.788114	Isa	147	CADAFUAG00000623	AFUA_6G03700	Afu6G03700	Putative uncharacterized protein [Source:UniProtKB/TrEMBL
CADAFUAG00000624	662.64	-0.0968055	0.144207	-0.671297	0.502031	0.611729	Itra	147	CADAFUAG00000624	AFUA_6G02870	Afu6G02870	Putative uncharacterized protein [Source:UniProtKB/TrEMBL
CADAFUAG00000624	662.64	0.224977	0.129641	1.73539	0.0826723	0.167039	Isa	147	CADAFUAG00000624	AFUA_6G02870	Afu6G02870	Putative uncharacterized protein [Source:UniProtKB/TrEMBL
CADAFUAG00000625	73.0501	-0.727715	0.354612	-2.05215	0.0401555	0.0762793	Itra	147	CADAFUAG00000625	AFUA_6G04720	Afu6G04720	Mitochondrial mRNA processing protein PET127; putative [Source:UniProtKB/TrEMBL
CADAFUAG00000625	73.0501	-0.356396	0.265717	-1.34126	0.179836	0.306937	Isa	147	CADAFUAG00000625	AFUA_6G04720	Afu6G04720	Mitochondrial mRNA processing protein PET127; putative [Source:UniProtKB/TrEMBL
CADAFUAG00000626	920.483	-0.629568	0.14305	-4.40103	1.0774e-05	4.15343e-05	Itra	147	CADAFUAG00000626	AFUA_6G04310	Afu6G04310	mRNA binding protein Pumilio 2; putative [Source:UniProtKB/TrEMBL
CADAFUAG00000626	920.483	-0.215238	0.125407	-1.71631	0.0861046	0.17254	Isa	147	CADAFUAG00000626	AFUA_6G04310	Afu6G04310	mRNA binding protein Pumilio 2; putative [Source:UniProtKB/TrEMBL
CADAFUAG00000627	199.223	0.789134	0.210613	3.74685	0.000179071	0.000572892	Itra	147	CADAFUAG00000627	AFUA_6G05190	Afu6G05190	Putative uncharacterized protein [Source:UniProtKB/TrEMBL
CADAFUAG00000627	199.223	0.76613	0.187944	4.07638	4.57429e-05	0.000206881	Isa	147	CADAFUAG00000627	AFUA_6G05190	Afu6G05190	Putative uncharacterized protein [Source:UniProtKB/TrEMBL
CADAFUAG00000628	43.3902	-0.869745	0.423855	-2.05199	0.0401708	0.076293	Itra	147	CADAFUAG00000628	AFUA_6G02050	Afu6G02050	Putative uncharacterized protein [Source:UniProtKB/TrEMBL
CADAFUAG00000628	43.3902	-0.587092	0.346021	-1.69669	0.0897543	0.177939	Isa	147	CADAFUAG00000628	AFUA_6G02050	Afu6G02050	Putative uncharacterized protein [Source:UniProtKB/TrEMBL
CADAFUAG00000629	257.558	0.840144	0.195195	4.30412	1.67649e-05	6.29335e-05	Itra	147	CADAFUAG00000629	AFUA_6G03070	Afu6G03070	Extracellular dioxygenase; putative [Source:UniProtKB/TrEMBL
CADAFUAG00000629	257.558	-0.374359	0.174283	-2.14799	0.0317145	0.0750488	Isa	147	CADAFUAG00000629	AFUA_6G03070	Afu6G03070	Extracellular dioxygenase; putative [Source:UniProtKB/TrEMBL
CADAFUAG00000630	205.852	-1.82393	0.256716	-7.10483	1.20468e-12	9.45419e-12	Itra	147	CADAFUAG00000630	AFUA_6G03890	Afu6G03890	Catalase A [Source:UniProtKB/Swiss-Prot
CADAFUAG00000630	205.852	0.509399	0.190258	2.67741	0.00741933	0.0211967	Isa	147	CADAFUAG00000630	AFUA_6G03890	Afu6G03890	Catalase A [Source:UniProtKB/Swiss-Prot
CADAFUAG00000631	594.706	-0.50402	0.159876	-3.15256	0.00161845	0.00434346	Itra	147	CADAFUAG00000631	AFUA_6G02830	Afu6G02830	Putative uncharacterized protein [Source:UniProtKB/TrEMBL
CADAFUAG00000631	594.706	-0.191342	0.137706	-1.3895	0.164682	0.286299	Isa	147	CADAFUAG00000631	AFUA_6G02830	Afu6G02830	Putative uncharacterized protein [Source:UniProtKB/TrEMBL
CADAFUAG00000632	61.9086	-0.480957	0.369065	-1.30318	0.192514	0.287766	Itra	147	CADAFUAG00000632	AFUA_6G04850	Afu6G04850	Short chain dehydrogenase/reductase family protein [Source:UniProtKB/TrEMBL
CADAFUAG00000632	61.9086	-0.592278	0.29334	-2.01908	0.0434787	0.0979298	Isa	147	CADAFUAG00000632	AFUA_6G04850	Afu6G04850	Short chain dehydrogenase/reductase family protein [Source:UniProtKB/TrEMBL
CADAFUAG00000633	3.13122	1.67555	1.52649	1.09765	0.272359	0.381674	Itra	147	CADAFUAG00000633	AFUA_6G04370	Afu6G04370	Putative uncharacterized protein [Source:UniProtKB/TrEMBL
CADAFUAG00000633	3.13122	2.33252	1.59953	1.45825	0.144772	0.259959	Isa	147	CADAFUAG00000633	AFUA_6G04370	Afu6G04370	Putative uncharacterized protein [Source:UniProtKB/TrEMBL
CADAFUAG00000634	60.0198	-0.640374	0.40819	-1.56881	0.116692	0.190011	Itra	147	CADAFUAG00000634	AFUA_6G04440	Afu6G04440	Mitochondrial translation optimization protein (Mto1); putative [Source:UniProtKB/TrEMBL
CADAFUAG00000634	60.0198	-0.202393	0.348447	-0.580844	0.561346	0.703786	Isa	147	CADAFUAG00000634	AFUA_6G04440	Afu6G04440	Mitochondrial translation optimization protein (Mto1); putative [Source:UniProtKB/TrEMBL
CADAFUAG00000635	26.5626	-0.181537	0.515676	-0.352038	0.72481	0.799782	Itra	147	CADAFUAG00000635	AFUA_6G03800	Afu6G03800	Putative uncharacterized protein [Source:UniProtKB/TrEMBL
CADAFUAG00000635	26.5626	0.425879	0.451626	0.942989	0.345686	0.502917	Isa	147	CADAFUAG00000635	AFUA_6G03800	Afu6G03800	Putative uncharacterized protein [Source:UniProtKB/TrEMBL
CADAFUAG00000636	107.379	-0.127524	0.284381	-0.448426	0.653846	0.742748	Itra	147	CADAFUAG00000636	AFUA_6G04330	Afu6G04330	DEAH-box RNA helicase (Dhr1); putative [Source:UniProtKB/TrEMBL
CADAFUAG00000636	107.379	-0.432738	0.228254	-1.89586	0.0579782	0.12429	Isa	147	CADAFUAG00000636	AFUA_6G04330	Afu6G04330	DEAH-box RNA helicase (Dhr1); putative [Source:UniProtKB/TrEMBL
CADAFUAG00000637	0.321466	-0.769109	4.22785	-0.181915	0.855649	NA	Itra	147	CADAFUAG00000637	AFUA_6G03550	Afu6G03550	Putative uncharacterized protein [Source:UniProtKB/TrEMBL
CADAFUAG00000637	0.321466	-2.22634	4.13127	-0.538899	0.589956	NA	Isa	147	CADAFUAG00000637	AFUA_6G03550	Afu6G03550	Putative uncharacterized protein [Source:UniProtKB/TrEMBL
CADAFUAG00000638	273.068	0.962303	0.189581	5.07595	3.85567e-07	1.77654e-06	Itra	147	CADAFUAG00000638	AFUA_6G03910	Afu6G03910	Integral membrane protein; Mpv17/PMP22 family; putative [Source:UniProtKB/TrEMBL
CADAFUAG00000638	273.068	0.647351	0.164745	3.92943	8.51491e-05	0.000366809	Isa	147	CADAFUAG00000638	AFUA_6G03910	Afu6G03910	Integral membrane protein; Mpv17/PMP22 family; putative [Source:UniProtKB/TrEMBL
CADAFUAG00000639	669.589	0.418435	0.134601	3.10871	0.00187903	0.00497056	Itra	147	CADAFUAG00000639	AFUA_6G03850	Afu6G03850	Signal sequence receptor alpha subunit; putative [Source:UniProtKB/TrEMBL
CADAFUAG00000639	669.589	0.622551	0.120531	5.16507	2.40355e-07	1.50625e-06	Isa	147	CADAFUAG00000639	AFUA_6G03850	Afu6G03850	Signal sequence receptor alpha subunit; putative [Source:UniProtKB/TrEMBL
CADAFUAG00000640	4501.26	1.312	0.134255	9.77242	1.47876e-22	2.22309e-21	Itra	147	CADAFUAG00000640	AFUA_6G02330	Afu6G02330	C6 transcription factor; putative [Source:UniProtKB/TrEMBL
CADAFUAG00000640	4501.26	1.32075	0.129618	10.1896	2.20781e-24	5.32458e-23	Isa	147	CADAFUAG00000640	AFUA_6G02330	Afu6G02330	C6 transcription factor; putative [Source:UniProtKB/TrEMBL
CADAFUAG00000641	54.3511	0.387759	0.372925	1.03978	0.298444	0.41085	Itra	147	CADAFUAG00000641	AFUA_6G02640	Afu6G02640	Putative uncharacterized protein [Source:UniProtKB/TrEMBL
CADAFUAG00000641	54.3511	-0.300586	0.305652	-0.983425	0.325398	0.481831	Isa	147	CADAFUAG00000641	AFUA_6G02640	Afu6G02640	Putative uncharacterized protein [Source:UniProtKB/TrEMBL
CADAFUAG00000642	593.486	-0.402625	0.159313	-2.52726	0.0114956	0.0251985	Itra	147	CADAFUAG00000642	AFUA_6G04910	Afu6G04910	Leucyl-tRNA synthetase [Source:UniProtKB/TrEMBL
CADAFUAG00000642	593.486	-0.334236	0.133335	-2.50674	0.0121851	0.0327004	Isa	147	CADAFUAG00000642	AFUA_6G04910	Afu6G04910	Leucyl-tRNA synthetase [Source:UniProtKB/TrEMBL
CADAFUAG00000643	1065.28	-1.43972	0.127432	-11.2979	1.34327e-29	2.67548e-28	Itra	147	CADAFUAG00000643	AFUA_6G02530	Afu6G02530	DNA repair protein RAD1; putative [Source:UniProtKB/TrEMBL
CADAFUAG00000643	1065.28	-0.759953	0.110165	-6.89832	5.26215e-12	5.45963e-11	Isa	147	CADAFUAG00000643	AFUA_6G02530	Afu6G02530	DNA repair protein RAD1; putative [Source:UniProtKB/TrEMBL
CADAFUAG00000644	9.40329	2.28904	1.08252	2.11456	0.0344677	0.0667096	Itra	147	CADAFUAG00000644	AFUA_6G01800	Afu6G01800	Endoglucanase; putative [Source:UniProtKB/TrEMBL
CADAFUAG00000644	9.40329	0.485145	0.749362	0.647411	0.517366	0.666497	Isa	147	CADAFUAG00000644	AFUA_6G01800	Afu6G01800	Endoglucanase; putative [Source:UniProtKB/TrEMBL
CADAFUAG00000645	451.357	-0.212824	0.165422	-1.28655	0.19825	0.294335	Itra	147	CADAFUAG00000645	AFUA_6G04710	Afu6G04710	Putative uncharacterized protein [Source:UniProtKB/TrEMBL
CADAFUAG00000645	451.357	0.0155623	0.144133	0.107972	0.914018	0.950713	Isa	147	CADAFUAG00000645	AFUA_6G04710	Afu6G04710	Putative uncharacterized protein [Source:UniProtKB/TrEMBL
CADAFUAG00000646	208.324	-1.91899	0.226537	-8.47097	2.43351e-17	2.69974e-16	Itra	147	CADAFUAG00000646	AFUA_6G03750	Afu6G03750	Amidophosphoribosyltransferase [Source:UniProtKB/TrEMBL
CADAFUAG00000646	208.324	-0.987557	0.17507	-5.64094	1.69124e-08	1.22298e-07	Isa	147	CADAFUAG00000646	AFUA_6G03750	Afu6G03750	Amidophosphoribosyltransferase [Source:UniProtKB/TrEMBL
CADAFUAG00000647	126.116	1.61273	0.255904	6.30211	2.93624e-10	1.8974e-09	Itra	147	CADAFUAG00000647	AFUA_6G03970	Afu6G03970	Cell cycle checkpoint protein (Hus1); putative [Source:UniProtKB/TrEMBL
CADAFUAG00000647	126.116	0.366855	0.237479	1.54479	0.122397	0.228046	Isa	147	CADAFUAG00000647	AFUA_6G03970	Afu6G03970	Cell cycle checkpoint protein (Hus1); putative [Source:UniProtKB/TrEMBL
CADAFUAG00000648	42.6613	0.759168	0.497683	1.5254	0.127158	0.20441	Itra	147	CADAFUAG00000648	AFUA_6G03240	Afu6G03240	Putative uncharacterized protein [Source:UniProtKB/TrEMBL
CADAFUAG00000648	42.6613	0.911972	0.428447	2.12855	0.0332914	0.0779798	Isa	147	CADAFUAG00000648	AFUA_6G03240	Afu6G03240	Putative uncharacterized protein [Source:UniProtKB/TrEMBL
CADAFUAG00000649	232.991	0.439091	0.198047	2.21711	0.0266158	0.0531359	Itra	147	CADAFUAG00000649	AFUA_6G02940	Afu6G02940	Chitin synthase activator (Chs3); putative [Source:UniProtKB/TrEMBL
CADAFUAG00000649	232.991	-0.316919	0.167857	-1.88803	0.0590222	0.126111	Isa	147	CADAFUAG00000649	AFUA_6G02940	Afu6G02940	Chitin synthase activator (Chs3); putative [Source:UniProtKB/TrEMBL
CADAFUAG00000650	302.639	-1.28462	0.219451	-5.85378	4.80525e-09	2.72144e-08	Itra	147	CADAFUAG00000650	AFUA_6G03640	Afu6G03640	Aminotransferase; putative [Source:UniProtKB/TrEMBL
CADAFUAG00000650	302.639	-0.40087	0.158682	-2.52624	0.0115289	0.0311886	Isa	147	CADAFUAG00000650	AFUA_6G03640	Afu6G03640	Aminotransferase; putative [Source:UniProtKB/TrEMBL
CADAFUAG00000651	451.149	-1.12642	0.203217	-5.54294	2.97428e-08	1.57136e-07	Itra	147	CADAFUAG00000651	AFUA_6G05200	Afu6G05200	60S ribosomal protein L28 [Source:UniProtKB/TrEMBL
CADAFUAG00000651	451.149	-0.818487	0.178402	-4.58788	4.47761e-06	2.38982e-05	Isa	147	CADAFUAG00000651	AFUA_6G05200	Afu6G05200	60S ribosomal protein L28 [Source:UniProtKB/TrEMBL
CADAFUAG00000652	288.152	0.703804	0.178821	3.93579	8.29238e-05	0.000281309	Itra	147	CADAFUAG00000652	AFUA_6G04210	Afu6G04210	Mannosyl-oligosaccharide glucosidase; putative [Source:UniProtKB/TrEMBL
CADAFUAG00000652	288.152	0.00635552	0.162581	0.0390913	0.968818	0.982818	Isa	147	CADAFUAG00000652	AFUA_6G04210	Afu6G04210	Mannosyl-oligosaccharide glucosidase; putative [Source:UniProtKB/TrEMBL
CADAFUAG00000653	552.448	0.0378874	0.151068	0.250797	0.801971	0.860192	Itra	147	CADAFUAG00000653	AFUA_6G05340	Afu6G05340	Tryptophanyl-tRNA synthetase; putative [Source:UniProtKB/TrEMBL
CADAFUAG00000653	552.448	-0.180608	0.142963	-1.26332	0.206473	0.341474	Isa	147	CADAFUAG00000653	AFUA_6G05340	Afu6G05340	Tryptophanyl-tRNA synthetase; putative [Source:UniProtKB/TrEMBL
CADAFUAG00000654	910.878	0.000698529	0.138391	0.0050475	0.995973	0.997452	Itra	147	CADAFUAG00000654	AFUA_6G04030	Afu6G04030	Putative uncharacterized protein [Source:UniProtKB/TrEMBL
CADAFUAG00000654	910.878	-0.218759	0.133081	-1.6438	0.100218	0.194468	Isa	147	CADAFUAG00000654	AFUA_6G04030	Afu6G04030	Putative uncharacterized protein [Source:UniProtKB/TrEMBL
CADAFUAG00000655	880.4	-0.888686	0.134831	-6.59113	4.36501e-11	3.03685e-10	Itra	147	CADAFUAG00000655	AFUA_6G02620	Afu6G02620	2-dehydropantoate 2-reductase; putative [Source:UniProtKB/TrEMBL
CADAFUAG00000655	880.4	-0.228918	0.115925	-1.97472	0.0483003	0.106852	Isa	147	CADAFUAG00000655	AFUA_6G02620	Afu6G02620	2-dehydropantoate 2-reductase; putative [Source:UniProtKB/TrEMBL
CADAFUAG00000656	489.668	-0.790408	0.162453	-4.86546	1.14193e-06	4.97507e-06	Itra	147	CADAFUAG00000656	AFUA_6G04010	Afu6G04010	Chromosome segregation protein Cse1; putative [Source:UniProtKB/TrEMBL
CADAFUAG00000656	489.668	-0.162235	0.130969	-1.23873	0.215446	0.352906	Isa	147	CADAFUAG00000656	AFUA_6G04010	Afu6G04010	Chromosome segregation protein Cse1; putative [Source:UniProtKB/TrEMBL
CADAFUAG00000657	1106.67	0.862454	0.134363	6.41885	1.37311e-10	9.12281e-10	Itra	147	CADAFUAG00000657	AFUA_6G04200	Afu6G04200	Putative uncharacterized protein [Source:UniProtKB/TrEMBL
CADAFUAG00000657	1106.67	-0.016921	0.128673	-0.131504	0.895376	0.939625	Isa	147	CADAFUAG00000657	AFUA_6G04200	Afu6G04200	Putative uncharacterized protein [Source:UniProtKB/TrEMBL
CADAFUAG00000658	232.251	-0.293506	0.216557	-1.35533	0.175313	0.266461	Itra	147	CADAFUAG00000658	AFUA_6G04080	Afu6G04080	Putative uncharacterized protein [Source:UniProtKB/TrEMBL
CADAFUAG00000658	232.251	-0.0929614	0.179985	-0.516495	0.605509	0.741293	Isa	147	CADAFUAG00000658	AFUA_6G04080	Afu6G04080	Putative uncharacterized protein [Source:UniProtKB/TrEMBL
CADAFUAG00000659	252.787	-1.25321	0.203263	-6.16547	7.02762e-10	4.37939e-09	Itra	147	CADAFUAG00000659	AFUA_6G02040	Afu6G02040	Putative uncharacterized protein [Source:UniProtKB/TrEMBL
CADAFUAG00000659	252.787	-1.45122	0.177103	-8.19421	2.52243e-16	3.7559e-15	Isa	147	CADAFUAG00000659	AFUA_6G02040	Afu6G02040	Putative uncharacterized protein [Source:UniProtKB/TrEMBL
CADAFUAG00000660	21.5501	-0.0246622	0.593091	-0.0415825	0.966832	0.97802	Itra	147	CADAFUAG00000660	AFUA_6G04630	Afu6G04630	60S ribosomal subunit assembly/export protein loc1 [Source:UniProtKB/Swiss-Prot
CADAFUAG00000660	21.5501	-0.29429	0.477019	-0.616936	0.537277	0.683601	Isa	147	CADAFUAG00000660	AFUA_6G04630	Afu6G04630	60S ribosomal subunit assembly/export protein loc1 [Source:UniProtKB/Swiss-Prot
CADAFUAG00000661	88.6334	-0.545077	0.300201	-1.8157	0.0694157	0.121836	Itra	147	CADAFUAG00000661	AFUA_6G02515	Afu6G02515	Putative uncharacterized protein [Source:UniProtKB/TrEMBL
CADAFUAG00000661	88.6334	-0.242159	0.249437	-0.97082	0.331638	0.488197	Isa	147	CADAFUAG00000661	AFUA_6G02515	Afu6G02515	Putative uncharacterized protein [Source:UniProtKB/TrEMBL
CADAFUAG00000662	35.547	1.92828	0.509757	3.78275	0.000155106	0.000500805	Itra	147	CADAFUAG00000662	AFUA_6G01960	Afu6G01960	C6 finger domain protein; putative [Source:UniProtKB/TrEMBL
CADAFUAG00000662	35.547	0.407297	0.368802	1.10438	0.269428	0.420006	Isa	147	CADAFUAG00000662	AFUA_6G01960	Afu6G01960	C6 finger domain protein; putative [Source:UniProtKB/TrEMBL
CADAFUAG00000663	89.5977	0.955603	0.307589	3.10675	0.00189156	0.00499949	Itra	147	CADAFUAG00000663	AFUA_6G02300	Afu6G02300	Serine/threonine protein kinase (Kcc4); putative [Source:UniProtKB/TrEMBL
CADAFUAG00000663	89.5977	1.05032	0.275654	3.81029	0.000138805	0.000579504	Isa	147	CADAFUAG00000663	AFUA_6G02300	Afu6G02300	Serine/threonine protein kinase (Kcc4); putative [Source:UniProtKB/TrEMBL
CADAFUAG00000664	583.836	-0.199961	0.188757	-1.05936	0.289437	0.401376	Itra	147	CADAFUAG00000664	AFUA_6G02750	Afu6G02750	Nascent polypeptide-associated complex subunit beta [Source:UniProtKB/Swiss-Prot
CADAFUAG00000664	583.836	-0.102952	0.17527	-0.587392	0.55694	0.69989	Isa	147	CADAFUAG00000664	AFUA_6G02750	Afu6G02750	Nascent polypeptide-associated complex subunit beta [Source:UniProtKB/Swiss-Prot
CADAFUAG00000665	300.526	-0.149849	0.179467	-0.834963	0.403738	0.519896	Itra	147	CADAFUAG00000665	AFUA_6G02860	Afu6G02860	Isocitrate lyase [Source:UniProtKB/TrEMBL
CADAFUAG00000665	300.526	-0.0824397	0.157257	-0.524236	0.600114	0.736977	Isa	147	CADAFUAG00000665	AFUA_6G02860	Afu6G02860	Isocitrate lyase [Source:UniProtKB/TrEMBL
CADAFUAG00000666	139.383	0.0369914	0.230833	0.160252	0.872683	0.913009	Itra	147	CADAFUAG00000666	AFUA_6G02770	Afu6G02770	Short-chain dehydrogenase/reductase family protein; putative [Source:UniProtKB/TrEMBL
CADAFUAG00000666	139.383	-0.150398	0.207297	-0.725517	0.468135	0.623355	Isa	147	CADAFUAG00000666	AFUA_6G02770	Afu6G02770	Short-chain dehydrogenase/reductase family protein; putative [Source:UniProtKB/TrEMBL
CADAFUAG00000667	64.1192	1.44473	0.350842	4.11788	3.82371e-05	0.00013602	Itra	147	CADAFUAG00000667	AFUA_6G02170	Afu6G02170	Metalloreductase transmembrane component; putative [Source:UniProtKB/TrEMBL
CADAFUAG00000667	64.1192	-0.254793	0.294884	-0.864045	0.387563	0.547077	Isa	147	CADAFUAG00000667	AFUA_6G02170	Afu6G02170	Metalloreductase transmembrane component; putative [Source:UniProtKB/TrEMBL
CADAFUAG00000668	1.59921	-0.614848	2.04992	-0.299937	0.764225	0.831156	Itra	147	CADAFUAG00000668	AFUA_6G03310	Afu6G03310	Putative uncharacterized protein [Source:UniProtKB/TrEMBL
CADAFUAG00000668	1.59921	-0.299694	1.85172	-0.161846	0.871427	NA	Isa	147	CADAFUAG00000668	AFUA_6G03310	Afu6G03310	Putative uncharacterized protein [Source:UniProtKB/TrEMBL
CADAFUAG00000669	1.37521	4.0539	4.85652	0.834733	0.403868	0.519896	Itra	147	CADAFUAG00000669	AFUA_6G03280	Afu6G03280	Swollenin; putative [Source:UniProtKB/TrEMBL
CADAFUAG00000669	1.37521	2.10428	4.83937	0.434826	0.663689	NA	Isa	147	CADAFUAG00000669	AFUA_6G03280	Afu6G03280	Swollenin; putative [Source:UniProtKB/TrEMBL
CADAFUAG00000670	297.647	0.177278	0.179553	0.987329	0.323482	0.438099	Itra	147	CADAFUAG00000670	AFUA_6G04620	Afu6G04620	NADH-ubiquinone oxidoreductase B14 subunit; putative [Source:UniProtKB/TrEMBL
CADAFUAG00000670	297.647	-0.0810319	0.162367	-0.499065	0.617733	0.750584	Isa	147	CADAFUAG00000670	AFUA_6G04620	Afu6G04620	NADH-ubiquinone oxidoreductase B14 subunit; putative [Source:UniProtKB/TrEMBL
CADAFUAG00000671	452.095	-0.476907	0.1748	-2.7283	0.00636615	0.0149361	Itra	147	CADAFUAG00000671	AFUA_6G02270	Afu6G02270	Ribonuclease P complex subunit Pop1; putative [Source:UniProtKB/TrEMBL
CADAFUAG00000671	452.095	0.212697	0.130492	1.62997	0.103108	0.198932	Isa	147	CADAFUAG00000671	AFUA_6G02270	Afu6G02270	Ribonuclease P complex subunit Pop1; putative [Source:UniProtKB/TrEMBL
CADAFUAG00000672	4.61451	-3.19716	1.56879	-2.03797	0.0415526	0.0785538	Itra	147	CADAFUAG00000672	AFUA_6G03720	Afu6G03720	MFS allantoate transporter; putative [Source:UniProtKB/TrEMBL
CADAFUAG00000672	4.61451	0.114519	1.0083	0.113577	0.909573	0.94772	Isa	147	CADAFUAG00000672	AFUA_6G03720	Afu6G03720	MFS allantoate transporter; putative [Source:UniProtKB/TrEMBL
CADAFUAG00000673	135.755	1.06772	0.240713	4.43564	9.18013e-06	3.574e-05	Itra	147	CADAFUAG00000673	AFUA_6G03510	Afu6G03510	Flavin containing polyamine oxidase; putative [Source:UniProtKB/TrEMBL
CADAFUAG00000673	135.755	-0.767982	0.221705	-3.46398	0.000532246	0.00199438	Isa	147	CADAFUAG00000673	AFUA_6G03510	Afu6G03510	Flavin containing polyamine oxidase; putative [Source:UniProtKB/TrEMBL
CADAFUAG00000674	96.7321	-0.221689	0.28584	-0.775568	0.438004	0.553278	Itra	147	CADAFUAG00000674	AFUA_6G02600	Afu6G02600	Phosphoglycerate mutase family protein [Source:UniProtKB/TrEMBL
CADAFUAG00000674	96.7321	-0.239161	0.243	-0.984201	0.325017	0.481656	Isa	147	CADAFUAG00000674	AFUA_6G02600	Afu6G02600	Phosphoglycerate mutase family protein [Source:UniProtKB/TrEMBL
CADAFUAG00000675	375.785	1.13442	0.169697	6.68496	2.30983e-11	1.64087e-10	Itra	147	CADAFUAG00000675	AFUA_6G04320	Afu6G04320	Pre-mRNA-splicing factor cwc21 [Source:UniProtKB/Swiss-Prot
CADAFUAG00000675	375.785	0.100259	0.155208	0.645964	0.518303	0.66723	Isa	147	CADAFUAG00000675	AFUA_6G04320	Afu6G04320	Pre-mRNA-splicing factor cwc21 [Source:UniProtKB/Swiss-Prot
CADAFUAG00000676	370.124	-0.472214	0.1691	-2.79252	0.00522988	0.0125414	Itra	147	CADAFUAG00000676	AFUA_6G04560	Afu6G04560	37S ribosomal protein S9 [Source:UniProtKB/TrEMBL
CADAFUAG00000676	370.124	-0.451107	0.146263	-3.08422	0.00204088	0.00679394	Isa	147	CADAFUAG00000676	AFUA_6G04560	Afu6G04560	37S ribosomal protein S9 [Source:UniProtKB/TrEMBL
CADAFUAG00000677	3786.09	-0.48051	0.106703	-4.50323	6.69282e-06	2.63939e-05	Itra	147	CADAFUAG00000677	AFUA_6G04750	Afu6G04750	Hsp70 nucleotide exchange factor fes1 [Source:UniProtKB/Swiss-Prot
CADAFUAG00000677	3786.09	-0.99481	0.103583	-9.604	7.68978e-22	1.59933e-20	Isa	147	CADAFUAG00000677	AFUA_6G04750	Afu6G04750	Hsp70 nucleotide exchange factor fes1 [Source:UniProtKB/Swiss-Prot
CADAFUAG00000678	52.9439	-0.35103	0.378946	-0.926333	0.354273	0.470222	Itra	147	CADAFUAG00000678	AFUA_6G04770	Afu6G04770	Putative uncharacterized protein [Source:UniProtKB/TrEMBL
CADAFUAG00000678	52.9439	-0.139027	0.303162	-0.458588	0.64653	0.771514	Isa	147	CADAFUAG00000678	AFUA_6G04770	Afu6G04770	Putative uncharacterized protein [Source:UniProtKB/TrEMBL
CADAFUAG00000679	157.984	2.86698	0.27136	10.5652	4.31869e-26	7.44029e-25	Itra	147	CADAFUAG00000679	AFUA_6G04690	Afu6G04690	Putative uncharacterized protein [Source:UniProtKB/TrEMBL
CADAFUAG00000679	157.984	1.3606	0.240462	5.65827	1.52903e-08	1.11189e-07	Isa	147	CADAFUAG00000679	AFUA_6G04690	Afu6G04690	Putative uncharacterized protein [Source:UniProtKB/TrEMBL
CADAFUAG00000680	64.33	-0.995119	0.398022	-2.50016	0.0124137	0.0268864	Itra	147	CADAFUAG00000680	AFUA_6G03560	Afu6G03560	IgE-binding protein; putative [Source:UniProtKB/TrEMBL
CADAFUAG00000680	64.33	-0.776116	0.336839	-2.30411	0.0212163	0.053029	Isa	147	CADAFUAG00000680	AFUA_6G03560	Afu6G03560	IgE-binding protein; putative [Source:UniProtKB/TrEMBL
CADAFUAG00000681	553.671	-0.370852	0.150434	-2.4652	0.0136936	0.0293687	Itra	147	CADAFUAG00000681	AFUA_6G05110	Afu6G05110	Mitochondrial import receptor subunit (Tom40); putative [Source:UniProtKB/TrEMBL
CADAFUAG00000681	553.671	-0.426769	0.135717	-3.14455	0.00166342	0.00561574	Isa	147	CADAFUAG00000681	AFUA_6G05110	Afu6G05110	Mitochondrial import receptor subunit (Tom40); putative [Source:UniProtKB/TrEMBL
CADAFUAG00000682	1903.25	-0.171776	0.128082	-1.34113	0.179877	0.272106	Itra	147	CADAFUAG00000682	AFUA_6G02470	Afu6G02470	Fumarate hydratase; putative [Source:UniProtKB/TrEMBL
CADAFUAG00000682	1903.25	-0.183361	0.122274	-1.49959	0.133721	0.244226	Isa	147	CADAFUAG00000682	AFUA_6G02470	Afu6G02470	Fumarate hydratase; putative [Source:UniProtKB/TrEMBL
CADAFUAG00000683	61.7902	-0.326036	0.377905	-0.862744	0.388278	0.503706	Itra	147	CADAFUAG00000683	AFUA_6G04960	Afu6G04960	Ankyrin repeat protein [Source:UniProtKB/TrEMBL
CADAFUAG00000683	61.7902	0.735304	0.303888	2.41966	0.0155352	0.0404344	Isa	147	CADAFUAG00000683	AFUA_6G04960	Afu6G04960	Ankyrin repeat protein [Source:UniProtKB/TrEMBL
CADAFUAG00000684	89.0169	-0.0903634	0.295885	-0.305401	0.760061	0.828129	Itra	147	CADAFUAG00000684	AFUA_6G04460	Afu6G04460	Phosphatidyl synthase [Source:UniProtKB/TrEMBL
CADAFUAG00000684	89.0169	-0.44566	0.25631	-1.73876	0.0820777	0.16608	Isa	147	CADAFUAG00000684	AFUA_6G04460	Afu6G04460	Phosphatidyl synthase [Source:UniProtKB/TrEMBL
CADAFUAG00000685	1.80234	-0.224246	2.1967	-0.102084	0.91869	0.944913	Itra	147	CADAFUAG00000685	AFUA_6G03880	Afu6G03880	Putative uncharacterized protein [Source:UniProtKB/TrEMBL
CADAFUAG00000685	1.80234	0.638159	1.59475	0.400162	0.689037	NA	Isa	147	CADAFUAG00000685	AFUA_6G03880	Afu6G03880	Putative uncharacterized protein [Source:UniProtKB/TrEMBL
CADAFUAG00000686	3318.76	-1.31776	0.112482	-11.7152	1.06504e-31	2.33838e-30	Itra	147	CADAFUAG00000686	AFUA_6G02230	Afu6G02230	Glucokinase GlkA; putative [Source:UniProtKB/TrEMBL
CADAFUAG00000686	3318.76	-1.04226	0.106761	-9.76258	1.62956e-22	3.53512e-21	Isa	147	CADAFUAG00000686	AFUA_6G02230	Afu6G02230	Glucokinase GlkA; putative [Source:UniProtKB/TrEMBL
CADAFUAG00000687	3082.7	-0.115265	0.102471	-1.12485	0.260652	0.368441	Itra	147	CADAFUAG00000687	AFUA_6G03810	Afu6G03810	ATP synthase D chain; mitochondrial; putative [Source:UniProtKB/TrEMBL
CADAFUAG00000687	3082.7	-0.414917	0.0999131	-4.15278	3.28464e-05	0.000152666	Isa	147	CADAFUAG00000687	AFUA_6G03810	Afu6G03810	ATP synthase D chain; mitochondrial; putative [Source:UniProtKB/TrEMBL
CADAFUAG00000688	11.5956	1.18575	0.773398	1.53317	0.125235	0.201731	Itra	147	CADAFUAG00000688	AFUA_6G03210	Afu6G03210	Conidiation-specific protein (Con-10); putative [Source:UniProtKB/TrEMBL
CADAFUAG00000688	11.5956	0.349312	0.654698	0.533547	0.593655	0.731223	Isa	147	CADAFUAG00000688	AFUA_6G03210	Afu6G03210	Conidiation-specific protein (Con-10); putative [Source:UniProtKB/TrEMBL
CADAFUAG00000689	940.066	0.038401	0.13608	0.282194	0.777795	0.840771	Itra	147	CADAFUAG00000689	AFUA_6G02380	Afu6G02380	Ubiquitin carboxyl-terminal hydrolase [Source:UniProtKB/TrEMBL
CADAFUAG00000689	940.066	0.523538	0.120606	4.3409	1.41902e-05	7.02767e-05	Isa	147	CADAFUAG00000689	AFUA_6G02380	Afu6G02380	Ubiquitin carboxyl-terminal hydrolase [Source:UniProtKB/TrEMBL
CADAFUAG00000690	463.519	-1.92277	0.202462	-9.49695	2.16131e-21	3.06841e-20	Itra	147	CADAFUAG00000690	AFUA_6G03600	Afu6G03600	Integral membrane protein (Pth11); putative [Source:UniProtKB/TrEMBL
CADAFUAG00000690	463.519	-1.44821	0.165662	-8.74195	2.29125e-18	3.90546e-17	Isa	147	CADAFUAG00000690	AFUA_6G03600	Afu6G03600	Integral membrane protein (Pth11); putative [Source:UniProtKB/TrEMBL
CADAFUAG00000691	12.378	0.690999	0.799281	0.864525	0.3873	0.50268	Itra	147	CADAFUAG00000691	AFUA_6G03380	Afu6G03380	Putative uncharacterized protein [Source:UniProtKB/TrEMBL
CADAFUAG00000691	12.378	0.231701	0.62255	0.372181	0.709758	0.81957	Isa	147	CADAFUAG00000691	AFUA_6G03380	Afu6G03380	Putative uncharacterized protein [Source:UniProtKB/TrEMBL
CADAFUAG00000692	3239.4	1.32068	0.110573	11.9439	6.98406e-33	1.62806e-31	Itra	147	CADAFUAG00000692	AFUA_6G02010	Afu6G02010	Putative uncharacterized protein [Source:UniProtKB/TrEMBL
CADAFUAG00000692	3239.4	0.0336627	0.106678	0.315554	0.752341	0.847903	Isa	147	CADAFUAG00000692	AFUA_6G02010	Afu6G02010	Putative uncharacterized protein [Source:UniProtKB/TrEMBL
CADAFUAG00000693	504.167	0.206939	0.151699	1.36414	0.172522	0.262834	Itra	147	CADAFUAG00000693	AFUA_6G04110	Afu6G04110	CLPTM1 domain protein [Source:UniProtKB/TrEMBL
CADAFUAG00000693	504.167	-0.0573206	0.138082	-0.415119	0.678055	0.796245	Isa	147	CADAFUAG00000693	AFUA_6G04110	Afu6G04110	CLPTM1 domain protein [Source:UniProtKB/TrEMBL
CADAFUAG00000694	103.066	-0.931078	0.285333	-3.26312	0.00110192	0.00306699	Itra	147	CADAFUAG00000694	AFUA_6G04510	Afu6G04510	Probable tRNA threonylcarbamoyladenosine biosynthesis protein kae1 [Source:UniProtKB/Swiss-Prot
CADAFUAG00000694	103.066	-0.43898	0.241715	-1.8161	0.0693545	0.144576	Isa	147	CADAFUAG00000694	AFUA_6G04510	Afu6G04510	Probable tRNA threonylcarbamoyladenosine biosynthesis protein kae1 [Source:UniProtKB/Swiss-Prot
CADAFUAG00000695	61.7817	0.0148234	0.343785	0.0431181	0.965607	0.977165	Itra	147	CADAFUAG00000695	AFUA_6G04610	Afu6G04610	DNA-directed RNA polymerase I and III 14 kDa polypeptide [Source:UniProtKB/TrEMBL
CADAFUAG00000695	61.7817	-0.234155	0.291228	-0.804027	0.421382	0.58117	Isa	147	CADAFUAG00000695	AFUA_6G04610	Afu6G04610	DNA-directed RNA polymerase I and III 14 kDa polypeptide [Source:UniProtKB/TrEMBL
CADAFUAG00000696	1101.43	1.00558	0.119692	8.40134	4.41427e-17	4.80128e-16	Itra	147	CADAFUAG00000696	AFUA_6G05150	Afu6G05150	Transcriptional repressor TupA/RocA; putative [Source:UniProtKB/TrEMBL
CADAFUAG00000696	1101.43	0.143921	0.111243	1.29375	0.195752	0.327203	Isa	147	CADAFUAG00000696	AFUA_6G05150	Afu6G05150	Transcriptional repressor TupA/RocA; putative [Source:UniProtKB/TrEMBL
CADAFUAG00000697	173.668	1.07911	0.221472	4.87243	1.10232e-06	4.80915e-06	Itra	147	CADAFUAG00000697	AFUA_6G04890	Afu6G04890	CaaX prenyl proteinase Rce1 [Source:UniProtKB/TrEMBL
CADAFUAG00000697	173.668	0.538241	0.185439	2.90253	0.00370166	0.011523	Isa	147	CADAFUAG00000697	AFUA_6G04890	Afu6G04890	CaaX prenyl proteinase Rce1 [Source:UniProtKB/TrEMBL
CADAFUAG00000698	1051.57	0.285392	0.121664	2.34573	0.0189897	0.0393506	Itra	147	CADAFUAG00000698	AFUA_6G02090	Afu6G02090	ATP synthase subunit E; putative [Source:UniProtKB/TrEMBL
CADAFUAG00000698	1051.57	-0.401306	0.114807	-3.49549	0.000473192	0.00178905	Isa	147	CADAFUAG00000698	AFUA_6G02090	Afu6G02090	ATP synthase subunit E; putative [Source:UniProtKB/TrEMBL
CADAFUAG00000699	146.37	-0.183976	0.228134	-0.806436	0.419992	0.535757	Itra	147	CADAFUAG00000699	AFUA_6G02140	Afu6G02140	Peptidyl-prolyl cis-trans isomerase-like 1 [Source:UniProtKB/Swiss-Prot
CADAFUAG00000699	146.37	-0.578052	0.203284	-2.84357	0.00446114	0.0135933	Isa	147	CADAFUAG00000699	AFUA_6G02140	Afu6G02140	Peptidyl-prolyl cis-trans isomerase-like 1 [Source:UniProtKB/Swiss-Prot
CADAFUAG00000700	56.2793	-0.179007	0.352776	-0.507423	0.611858	0.708866	Itra	147	CADAFUAG00000700	AFUA_6G04550	Afu6G04550	Putative uncharacterized protein [Source:UniProtKB/TrEMBL
CADAFUAG00000700	56.2793	0.813838	0.354091	2.29838	0.0215399	0.053749	Isa	147	CADAFUAG00000700	AFUA_6G04550	Afu6G04550	Putative uncharacterized protein [Source:UniProtKB/TrEMBL
CADAFUAG00000701	566.206	1.66456	0.154202	10.7947	3.64601e-27	6.55656e-26	Itra	147	CADAFUAG00000701	AFUA_6G03100	Afu6G03100	Putative uncharacterized protein [Source:UniProtKB/TrEMBL
CADAFUAG00000701	566.206	0.430985	0.131095	3.28759	0.0010105	0.0035738	Isa	147	CADAFUAG00000701	AFUA_6G03100	Afu6G03100	Putative uncharacterized protein [Source:UniProtKB/TrEMBL
CADAFUAG00000702	98.3485	0.254427	0.28959	0.878578	0.37963	0.49504	Itra	147	CADAFUAG00000702	AFUA_6G03010	Afu6G03010	C2H2 finger domain protein (Zms1); putative [Source:UniProtKB/TrEMBL
CADAFUAG00000702	98.3485	0.112322	0.232116	0.483903	0.628455	0.758433	Isa	147	CADAFUAG00000702	AFUA_6G03010	Afu6G03010	C2H2 finger domain protein (Zms1); putative [Source:UniProtKB/TrEMBL
CADAFUAG00000703	73.1638	1.89804	0.369304	5.13951	2.75459e-07	1.30096e-06	Itra	147	CADAFUAG00000703	AFUA_6G01900	Afu6G01900	Flavin-binding monooxygenase-like protein [Source:UniProtKB/TrEMBL
CADAFUAG00000703	73.1638	1.28507	0.340013	3.77949	0.000157152	0.000648343	Isa	147	CADAFUAG00000703	AFUA_6G01900	Afu6G01900	Flavin-binding monooxygenase-like protein [Source:UniProtKB/TrEMBL
CADAFUAG00000704	569.246	-0.947043	0.159479	-5.93835	2.87912e-09	1.67067e-08	Itra	147	CADAFUAG00000704	AFUA_6G02720	Afu6G02720	FMN dependent dehydrogenase; putative [Source:UniProtKB/TrEMBL
CADAFUAG00000704	569.246	0.417233	0.131391	3.1755	0.00149577	0.00511064	Isa	147	CADAFUAG00000704	AFUA_6G02720	Afu6G02720	FMN dependent dehydrogenase; putative [Source:UniProtKB/TrEMBL
CADAFUAG00000705	1023.24	-0.397292	0.129103	-3.07734	0.0020886	0.00547128	Itra	147	CADAFUAG00000705	AFUA_6G04380	Afu6G04380	Molecular chaperone (ABC1); putative [Source:UniProtKB/TrEMBL
CADAFUAG00000705	1023.24	-0.615974	0.119513	-5.15404	2.54934e-07	1.58992e-06	Isa	147	CADAFUAG00000705	AFUA_6G04380	Afu6G04380	Molecular chaperone (ABC1); putative [Source:UniProtKB/TrEMBL
CADAFUAG00000706	445.635	0.26881	0.156744	1.71496	0.0863523	0.146998	Itra	147	CADAFUAG00000706	AFUA_6G04400	Afu6G04400	Transcription factor TFIIIB component; putative [Source:UniProtKB/TrEMBL
CADAFUAG00000706	445.635	-0.0101153	0.133284	-0.0758928	0.939504	0.96625	Isa	147	CADAFUAG00000706	AFUA_6G04400	Afu6G04400	Transcription factor TFIIIB component; putative [Source:UniProtKB/TrEMBL
CADAFUAG00000707	25.2463	-0.0182553	0.519869	-0.0351152	0.971988	0.982078	Itra	147	CADAFUAG00000707	AFUA_6G02575	Afu6G02575	Putative uncharacterized protein [Source:UniProtKB/TrEMBL
CADAFUAG00000707	25.2463	1.15721	0.461108	2.50963	0.0120857	0.0324721	Isa	147	CADAFUAG00000707	AFUA_6G02575	Afu6G02575	Putative uncharacterized protein [Source:UniProtKB/TrEMBL
CADAFUAG00000708	376.568	0.288017	0.16607	1.7343	0.0828641	0.141725	Itra	147	CADAFUAG00000708	AFUA_6G05330	Afu6G05330	37 ribosomal protein Rsm10; putative [Source:UniProtKB/TrEMBL
CADAFUAG00000708	376.568	0.0878512	0.153116	0.573757	0.566132	0.707997	Isa	147	CADAFUAG00000708	AFUA_6G05330	Afu6G05330	37 ribosomal protein Rsm10; putative [Source:UniProtKB/TrEMBL
CADAFUAG00000709	327.922	0.559823	0.180488	3.10171	0.00192407	0.00506841	Itra	147	CADAFUAG00000709	AFUA_6G02460	Afu6G02460	Glucosamine 6-phosphate acetyltransferase; putative [Source:UniProtKB/TrEMBL
CADAFUAG00000709	327.922	-0.348691	0.155243	-2.2461	0.0246979	0.060457	Isa	147	CADAFUAG00000709	AFUA_6G02460	Afu6G02460	Glucosamine 6-phosphate acetyltransferase; putative [Source:UniProtKB/TrEMBL
CADAFUAG00000710	1775.57	-0.476078	0.125392	-3.79674	0.000146614	0.000475011	Itra	147	CADAFUAG00000710	AFUA_6G04290	Afu6G04290	Phosphoethanolamine N-methyltransferase; putative [Source:UniProtKB/TrEMBL
CADAFUAG00000710	1775.57	-0.675311	0.119575	-5.6476	1.62703e-08	1.17937e-07	Isa	147	CADAFUAG00000710	AFUA_6G04290	Afu6G04290	Phosphoethanolamine N-methyltransferase; putative [Source:UniProtKB/TrEMBL
CADAFUAG00000711	3409.22	-0.740093	0.109432	-6.76306	1.35103e-11	9.81159e-11	Itra	147	CADAFUAG00000711	AFUA_6G02450	Afu6G02450	Ribosomal S30/ubiquitin fusion [Source:UniProtKB/TrEMBL
CADAFUAG00000711	3409.22	-0.115474	0.105373	-1.09586	0.273139	0.424069	Isa	147	CADAFUAG00000711	AFUA_6G02450	Afu6G02450	Ribosomal S30/ubiquitin fusion [Source:UniProtKB/TrEMBL
CADAFUAG00000712	140.707	0.374617	0.244538	1.53194	0.125538	0.202149	Itra	147	CADAFUAG00000712	AFUA_6G02410	Afu6G02410	WD repeat protein [Source:UniProtKB/TrEMBL
CADAFUAG00000712	140.707	0.237976	0.198584	1.19837	0.230775	0.372493	Isa	147	CADAFUAG00000712	AFUA_6G02410	Afu6G02410	WD repeat protein [Source:UniProtKB/TrEMBL
CADAFUAG00000713	169.328	-2.63638	0.426087	-6.1874	6.11629e-10	3.82663e-09	Itra	147	CADAFUAG00000713	AFUA_6G04280	Afu6G04280	Integral membrane protein [Source:UniProtKB/TrEMBL
CADAFUAG00000713	169.328	-0.111757	0.189542	-0.589614	0.555449	0.69886	Isa	147	CADAFUAG00000713	AFUA_6G04280	Afu6G04280	Integral membrane protein [Source:UniProtKB/TrEMBL
CADAFUAG00000714	24.7969	0.555714	0.511744	1.08592	0.277514	0.387759	Itra	147	CADAFUAG00000714	AFUA_6G03030	Afu6G03030	Phenol monooxygenase; putative [Source:UniProtKB/TrEMBL
CADAFUAG00000714	24.7969	0.700767	0.486433	1.44062	0.149691	0.266313	Isa	147	CADAFUAG00000714	AFUA_6G03030	Afu6G03030	Phenol monooxygenase; putative [Source:UniProtKB/TrEMBL
CADAFUAG00000715	89.632	-0.263302	0.292771	-0.899346	0.368469	0.484231	Itra	147	CADAFUAG00000715	AFUA_6G04090	Afu6G04090	DUF28 domain protein [Source:UniProtKB/TrEMBL
CADAFUAG00000715	89.632	-0.863227	0.244178	-3.53524	0.000407405	0.00156341	Isa	147	CADAFUAG00000715	AFUA_6G04090	Afu6G04090	DUF28 domain protein [Source:UniProtKB/TrEMBL
CADAFUAG00000716	496.696	0.223153	0.161149	1.38476	0.166127	0.254735	Itra	147	CADAFUAG00000716	AFUA_6G04840	Afu6G04840	Hypercellular protein HypA [Source:UniProtKB/TrEMBL
CADAFUAG00000716	496.696	-0.00762054	0.14492	-0.0525845	0.958063	0.976806	Isa	147	CADAFUAG00000716	AFUA_6G04840	Afu6G04840	Hypercellular protein HypA [Source:UniProtKB/TrEMBL
CADAFUAG00000717	3893.98	-0.880136	0.115395	-7.62719	2.39934e-14	2.14509e-13	Itra	147	CADAFUAG00000717	AFUA_6G01950	Afu6G01950	Putative uncharacterized protein [Source:UniProtKB/TrEMBL
CADAFUAG00000717	3893.98	-0.103783	0.110489	-0.939302	0.347575	0.505098	Isa	147	CADAFUAG00000717	AFUA_6G01950	Afu6G01950	Putative uncharacterized protein [Source:UniProtKB/TrEMBL
CADAFUAG00000718	88.0404	-1.74617	0.389213	-4.48642	7.24306e-06	2.84687e-05	Itra	147	CADAFUAG00000718	AFUA_6G01830	Afu6G01830	O-methyltransferase; putative [Source:UniProtKB/TrEMBL
CADAFUAG00000718	88.0404	1.45948	0.259904	5.61543	1.9607e-08	1.39667e-07	Isa	147	CADAFUAG00000718	AFUA_6G01830	Afu6G01830	O-methyltransferase; putative [Source:UniProtKB/TrEMBL
CADAFUAG00000719	122.229	0.193493	0.277067	0.698363	0.484951	0.597003	Itra	147	CADAFUAG00000719	AFUA_6G01970	Afu6G01970	GATA transcriptional activator AreA [Source:UniProtKB/TrEMBL
CADAFUAG00000719	122.229	0.32677	0.224487	1.45563	0.145494	0.260688	Isa	147	CADAFUAG00000719	AFUA_6G01970	Afu6G01970	GATA transcriptional activator AreA [Source:UniProtKB/TrEMBL
CADAFUAG00000720	5037.91	0.574587	0.0991497	5.79514	6.82624e-09	3.82018e-08	Itra	147	CADAFUAG00000720	AFUA_6G02520	Afu6G02520	Eukaryotic translation initiation factor eIF-1A subunit; putative [Source:UniProtKB/TrEMBL
CADAFUAG00000720	5037.91	0.759037	0.0957589	7.92654	2.25332e-15	3.13873e-14	Isa	147	CADAFUAG00000720	AFUA_6G02520	Afu6G02520	Eukaryotic translation initiation factor eIF-1A subunit; putative [Source:UniProtKB/TrEMBL
CADAFUAG00000721	398.733	-1.28717	0.182093	-7.06875	1.56341e-12	1.20985e-11	Itra	147	CADAFUAG00000721	AFUA_6G05280	Afu6G05280	Meiosis protein MEI2; putative [Source:UniProtKB/TrEMBL
CADAFUAG00000721	398.733	-0.931349	0.162099	-5.74557	9.16103e-09	6.84849e-08	Isa	147	CADAFUAG00000721	AFUA_6G05280	Afu6G05280	Meiosis protein MEI2; putative [Source:UniProtKB/TrEMBL
CADAFUAG00000722	356.789	-0.746565	0.183471	-4.06913	4.71895e-05	0.000165743	Itra	147	CADAFUAG00000722	AFUA_6G04800	Afu6G04800	Lysine decarboxylase-like protein [Source:UniProtKB/TrEMBL
CADAFUAG00000722	356.789	0.702955	0.15473	4.54311	5.54315e-06	2.92921e-05	Isa	147	CADAFUAG00000722	AFUA_6G04800	Afu6G04800	Lysine decarboxylase-like protein [Source:UniProtKB/TrEMBL
CADAFUAG00000723	424.304	-0.19812	0.165368	-1.19805	0.230896	0.333419	Itra	147	CADAFUAG00000723	AFUA_6G04870	Afu6G04870	Vacuolar protein sorting-associated protein VpsB [Source:UniProtKB/TrEMBL
CADAFUAG00000723	424.304	-0.261365	0.143348	-1.82329	0.0682598	0.142589	Isa	147	CADAFUAG00000723	AFUA_6G04870	Afu6G04870	Vacuolar protein sorting-associated protein VpsB [Source:UniProtKB/TrEMBL
CADAFUAG00000724	640.587	0.146476	0.149031	0.982855	0.325679	0.44038	Itra	147	CADAFUAG00000724	AFUA_6G04650	Afu6G04650	Putative uncharacterized protein [Source:UniProtKB/TrEMBL
CADAFUAG00000724	640.587	-0.15639	0.132436	-1.18087	0.237653	0.381288	Isa	147	CADAFUAG00000724	AFUA_6G04650	Afu6G04650	Putative uncharacterized protein [Source:UniProtKB/TrEMBL
CADAFUAG00000725	0.771304	-0.584251	2.92829	-0.199519	0.841857	0.88993	Itra	147	CADAFUAG00000725	AFUA_6G03300	Afu6G03300	Putative uncharacterized protein [Source:UniProtKB/TrEMBL
CADAFUAG00000725	0.771304	-0.229344	2.34985	-0.0975994	0.92225	NA	Isa	147	CADAFUAG00000725	AFUA_6G03300	Afu6G03300	Putative uncharacterized protein [Source:UniProtKB/TrEMBL
CADAFUAG00000726	0.380094	-0.761294	3.99955	-0.190345	0.849039	NA	Itra	147	CADAFUAG00000726	AFUA_6G03270	Afu6G03270	Putative uncharacterized protein [Source:UniProtKB/TrEMBL
CADAFUAG00000726	0.380094	0.912204	3.92416	0.232459	0.816182	NA	Isa	147	CADAFUAG00000726	AFUA_6G03270	Afu6G03270	Putative uncharacterized protein [Source:UniProtKB/TrEMBL
CADAFUAG00000727	21.1171	1.98361	0.579821	3.42107	0.000623746	0.00181361	Itra	147	CADAFUAG00000727	AFUA_6G01790	Afu6G01790	Putative uncharacterized protein [Source:UniProtKB/TrEMBL
CADAFUAG00000727	21.1171	0.956242	0.507699	1.88348	0.0596349	0.12724	Isa	147	CADAFUAG00000727	AFUA_6G01790	Afu6G01790	Putative uncharacterized protein [Source:UniProtKB/TrEMBL
CADAFUAG00000728	196.113	-0.556344	0.234688	-2.37057	0.0177606	0.0371626	Itra	147	CADAFUAG00000728	AFUA_6G02060	Afu6G02060	tRNA-splicing endonuclease; putative [Source:UniProtKB/TrEMBL
CADAFUAG00000728	196.113	0.329203	0.174144	1.89041	0.0587029	0.125665	Isa	147	CADAFUAG00000728	AFUA_6G02060	Afu6G02060	tRNA-splicing endonuclease; putative [Source:UniProtKB/TrEMBL
CADAFUAG00000729	418.371	-0.517104	0.208297	-2.48254	0.0130451	0.0281503	Itra	147	CADAFUAG00000729	AFUA_6G04050	Afu6G04050	Cell division cycle protein 123 [Source:UniProtKB/Swiss-Prot
CADAFUAG00000729	418.371	1.56433	0.160814	9.72754	2.30079e-22	4.96751e-21	Isa	147	CADAFUAG00000729	AFUA_6G04050	Afu6G04050	Cell division cycle protein 123 [Source:UniProtKB/Swiss-Prot
CADAFUAG00000730	271.268	0.343658	0.181607	1.89231	0.0584495	0.10533	Itra	147	CADAFUAG00000730	AFUA_6G04540	Afu6G04540	Calcineurin Ca2+-binding regulatory subunit CnaB [Source:UniProtKB/TrEMBL
CADAFUAG00000730	271.268	0.240141	0.15995	1.50135	0.133264	0.243683	Isa	147	CADAFUAG00000730	AFUA_6G04540	Afu6G04540	Calcineurin Ca2+-binding regulatory subunit CnaB [Source:UniProtKB/TrEMBL
CADAFUAG00000731	76.3881	-0.69022	0.319648	-2.15932	0.0308256	0.0604287	Itra	147	CADAFUAG00000731	AFUA_6G05070	Afu6G05070	tRNA isopentenyltransferase; putative [Source:UniProtKB/TrEMBL
CADAFUAG00000731	76.3881	-0.40781	0.269523	-1.51308	0.130258	0.239834	Isa	147	CADAFUAG00000731	AFUA_6G05070	Afu6G05070	tRNA isopentenyltransferase; putative [Source:UniProtKB/TrEMBL
CADAFUAG00000732	47.1745	-0.441272	0.38038	-1.16008	0.246014	0.351487	Itra	147	CADAFUAG00000732	AFUA_6G03740	Afu6G03740	C-5 cytosine methyltransferase DmtA [Source:UniProtKB/TrEMBL
CADAFUAG00000732	47.1745	-0.330054	0.35537	-0.928761	0.353013	0.509882	Isa	147	CADAFUAG00000732	AFUA_6G03740	Afu6G03740	C-5 cytosine methyltransferase DmtA [Source:UniProtKB/TrEMBL
CADAFUAG00000733	37.2851	0.279631	0.414427	0.674742	0.49984	0.609928	Itra	147	CADAFUAG00000733	AFUA_6G02430	Afu6G02430	Putative uncharacterized protein [Source:UniProtKB/TrEMBL
CADAFUAG00000733	37.2851	0.611136	0.407124	1.5011	0.133329	0.243683	Isa	147	CADAFUAG00000733	AFUA_6G02430	Afu6G02430	Putative uncharacterized protein [Source:UniProtKB/TrEMBL
CADAFUAG00000734	81.1311	0.507947	0.331847	1.53067	0.125852	0.202551	Itra	147	CADAFUAG00000734	AFUA_6G04670	Afu6G04670	ER-associated proteolytic system protein Der1; putative [Source:UniProtKB/TrEMBL
CADAFUAG00000734	81.1311	0.260966	0.267279	0.976382	0.328875	0.485092	Isa	147	CADAFUAG00000734	AFUA_6G04670	Afu6G04670	ER-associated proteolytic system protein Der1; putative [Source:UniProtKB/TrEMBL
CADAFUAG00000735	217.481	-0.0523044	0.216161	-0.24197	0.808803	0.865188	Itra	147	CADAFUAG00000735	AFUA_6G02840	Afu6G02840	Serine/threonine protein kinase; putative [Source:UniProtKB/TrEMBL
CADAFUAG00000735	217.481	-0.06614	0.18427	-0.35893	0.719647	0.82615	Isa	147	CADAFUAG00000735	AFUA_6G02840	Afu6G02840	Serine/threonine protein kinase; putative [Source:UniProtKB/TrEMBL
CADAFUAG00000736	303.608	-0.125826	0.186121	-0.676044	0.499013	0.609272	Itra	147	CADAFUAG00000736	AFUA_6G02200	Afu6G02200	C2HC5 finger protein [Source:UniProtKB/TrEMBL
CADAFUAG00000736	303.608	0.564373	0.149972	3.7632	0.000167755	0.000688014	Isa	147	CADAFUAG00000736	AFUA_6G02200	Afu6G02200	C2HC5 finger protein [Source:UniProtKB/TrEMBL
CADAFUAG00000737	184.243	0.53035	0.218371	2.42867	0.0151543	0.0322305	Itra	147	CADAFUAG00000737	AFUA_6G03840	Afu6G03840	ER to Golgi transport protein Yif1 [Source:UniProtKB/TrEMBL
CADAFUAG00000737	184.243	0.331316	0.182561	1.81483	0.0695507	0.144852	Isa	147	CADAFUAG00000737	AFUA_6G03840	Afu6G03840	ER to Golgi transport protein Yif1 [Source:UniProtKB/TrEMBL
CADAFUAG00000738	197.857	-0.158888	0.20557	-0.772915	0.439573	0.554813	Itra	147	CADAFUAG00000738	AFUA_6G03760	Afu6G03760	HhH-GPD family base excision DNA repair protein [Source:UniProtKB/TrEMBL
CADAFUAG00000738	197.857	0.339636	0.177835	1.90984	0.0561539	0.121095	Isa	147	CADAFUAG00000738	AFUA_6G03760	Afu6G03760	HhH-GPD family base excision DNA repair protein [Source:UniProtKB/TrEMBL
CADAFUAG00000739	43.3148	-0.111633	0.413511	-0.269964	0.787188	0.848674	Itra	147	CADAFUAG00000739	AFUA_6G04590	Afu6G04590	rRNA biogenesis protein rrp36 [Source:UniProtKB/Swiss-Prot
CADAFUAG00000739	43.3148	0.0125984	0.339884	0.0370667	0.970432	0.983666	Isa	147	CADAFUAG00000739	AFUA_6G04590	Afu6G04590	rRNA biogenesis protein rrp36 [Source:UniProtKB/Swiss-Prot
CADAFUAG00000740	1.06896	-0.0430498	2.51635	-0.017108	0.98635	0.990863	Itra	147	CADAFUAG00000740	AFUA_6G03150	Afu6G03150	Putative uncharacterized protein [Source:UniProtKB/TrEMBL
CADAFUAG00000740	1.06896	-0.850854	2.6261	-0.323999	0.745939	NA	Isa	147	CADAFUAG00000740	AFUA_6G03150	Afu6G03150	Putative uncharacterized protein [Source:UniProtKB/TrEMBL
CADAFUAG00000741	179.158	-0.795452	0.244427	-3.25435	0.00113652	0.00315958	Itra	147	CADAFUAG00000741	AFUA_6G05180	Afu6G05180	Splicing factor 3b subunit 4 [Source:UniProtKB/TrEMBL
CADAFUAG00000741	179.158	-0.00432227	0.191213	-0.0226045	0.981966	0.989334	Isa	147	CADAFUAG00000741	AFUA_6G05180	Afu6G05180	Splicing factor 3b subunit 4 [Source:UniProtKB/TrEMBL
CADAFUAG00000742	537.799	1.37456	0.177529	7.74276	9.7284e-15	8.95183e-14	Itra	147	CADAFUAG00000742	AFUA_6G01910	Afu6G01910	C2H2 finger domain protein; putative [Source:UniProtKB/TrEMBL
CADAFUAG00000742	537.799	0.882683	0.151915	5.81037	6.23341e-09	4.74996e-08	Isa	147	CADAFUAG00000742	AFUA_6G01910	Afu6G01910	C2H2 finger domain protein; putative [Source:UniProtKB/TrEMBL
CADAFUAG00000743	43.5164	0.396364	0.422751	0.937583	0.348459	0.464267	Itra	147	CADAFUAG00000743	AFUA_6G02215	Afu6G02215	Putative uncharacterized protein [Source:UniProtKB/TrEMBL
CADAFUAG00000743	43.5164	0.264912	0.369658	0.716639	0.473597	0.628153	Isa	147	CADAFUAG00000743	AFUA_6G02215	Afu6G02215	Putative uncharacterized protein [Source:UniProtKB/TrEMBL
CADAFUAG00000744	313.363	-0.00424529	0.194062	-0.0218759	0.982547	0.988462	Itra	147	CADAFUAG00000744	AFUA_6G04020	Afu6G04020	Peptidyl-tRNA hydrolase domain protein [Source:UniProtKB/TrEMBL
CADAFUAG00000744	313.363	0.0806676	0.170137	0.474134	0.635404	0.763228	Isa	147	CADAFUAG00000744	AFUA_6G04020	Afu6G04020	Peptidyl-tRNA hydrolase domain protein [Source:UniProtKB/TrEMBL
CADAFUAG00000745	231.542	1.32616	0.19102	6.94253	3.85136e-12	2.88577e-11	Itra	147	CADAFUAG00000745	AFUA_6G04930	Afu6G04930	Putative uncharacterized protein [Source:UniProtKB/TrEMBL
CADAFUAG00000745	231.542	0.877935	0.18009	4.87499	1.08814e-06	6.28887e-06	Isa	147	CADAFUAG00000745	AFUA_6G04930	Afu6G04930	Putative uncharacterized protein [Source:UniProtKB/TrEMBL
CADAFUAG00000746	378.848	3.875	0.19088	20.3007	1.26831e-91	1.66307e-89	Itra	147	CADAFUAG00000746	AFUA_6G03450	Afu6G03450	Putative uncharacterized protein [Source:UniProtKB/TrEMBL
CADAFUAG00000746	378.848	2.29577	0.231567	9.91403	3.61749e-23	8.20086e-22	Isa	147	CADAFUAG00000746	AFUA_6G03450	Afu6G03450	Putative uncharacterized protein [Source:UniProtKB/TrEMBL
CADAFUAG00000747	405.425	5.04032	0.235846	21.3712	2.47614e-101	3.71067e-99	Itra	147	CADAFUAG00000747	AFUA_6G03440	Afu6G03440	Fructosyl amino acid oxidase; putative [Source:UniProtKB/TrEMBL
CADAFUAG00000747	405.425	2.87443	0.217774	13.1992	8.87187e-40	4.57103e-38	Isa	147	CADAFUAG00000747	AFUA_6G03440	Afu6G03440	Fructosyl amino acid oxidase; putative [Source:UniProtKB/TrEMBL
CADAFUAG00000748	29.5056	-0.615487	0.498435	-1.23484	0.21689	0.317369	Itra	147	CADAFUAG00000748	AFUA_6G03020	Afu6G03020	Flavin-binding monooxygenase; putative [Source:UniProtKB/TrEMBL
CADAFUAG00000748	29.5056	-0.03965	0.431898	-0.091804	0.926854	0.958348	Isa	147	CADAFUAG00000748	AFUA_6G03020	Afu6G03020	Flavin-binding monooxygenase; putative [Source:UniProtKB/TrEMBL
CADAFUAG00000749	623.835	-0.15095	0.160269	-0.941849	0.34627	0.461938	Itra	147	CADAFUAG00000749	AFUA_6G02110	Afu6G02110	MADS box transcription factor Mcm1 [Source:UniProtKB/TrEMBL
CADAFUAG00000749	623.835	0.638244	0.139514	4.57476	4.76762e-06	2.53863e-05	Isa	147	CADAFUAG00000749	AFUA_6G02110	Afu6G02110	MADS box transcription factor Mcm1 [Source:UniProtKB/TrEMBL
CADAFUAG00000750	163.177	0.305387	0.250357	1.21981	0.222538	0.323993	Itra	147	CADAFUAG00000750	AFUA_6G03900	Afu6G03900	F-box domain protein [Source:UniProtKB/TrEMBL
CADAFUAG00000750	163.177	0.282405	0.202232	1.39645	0.16258	0.283624	Isa	147	CADAFUAG00000750	AFUA_6G03900	Afu6G03900	F-box domain protein [Source:UniProtKB/TrEMBL
CADAFUAG00000751	110.71	-1.60123	0.30152	-5.31054	1.09299e-07	5.43101e-07	Itra	147	CADAFUAG00000751	AFUA_6G03980	Afu6G03980	Hexokinase; putative [Source:UniProtKB/TrEMBL
CADAFUAG00000751	110.71	-1.63683	0.243476	-6.72275	1.78321e-11	1.75822e-10	Isa	147	CADAFUAG00000751	AFUA_6G03980	Afu6G03980	Hexokinase; putative [Source:UniProtKB/TrEMBL
CADAFUAG00000752	24.679	0.280493	0.554789	0.505585	0.613148	0.709887	Itra	147	CADAFUAG00000752	AFUA_6G03590	Afu6G03590	Citrate synthase [Source:UniProtKB/TrEMBL
CADAFUAG00000752	24.679	0.850447	0.473999	1.7942	0.0727819	0.150613	Isa	147	CADAFUAG00000752	AFUA_6G03590	Afu6G03590	Citrate synthase [Source:UniProtKB/TrEMBL
CADAFUAG00000753	551.057	0.128375	0.152931	0.839433	0.401226	0.517342	Itra	147	CADAFUAG00000753	AFUA_6G05130	Afu6G05130	snRNA cap binding complex subunit (Gcr3); putative [Source:UniProtKB/TrEMBL
CADAFUAG00000753	551.057	-0.00412996	0.135803	-0.0304113	0.975739	0.986206	Isa	147	CADAFUAG00000753	AFUA_6G05130	Afu6G05130	snRNA cap binding complex subunit (Gcr3); putative [Source:UniProtKB/TrEMBL
CADAFUAG00000754	39.3588	-1.51286	0.443429	-3.41173	0.000645512	0.00187228	Itra	147	CADAFUAG00000754	AFUA_6G02610	Afu6G02610	Putative uncharacterized protein [Source:UniProtKB/TrEMBL
CADAFUAG00000754	39.3588	-1.24211	0.404968	-3.06717	0.00216094	0.00715946	Isa	147	CADAFUAG00000754	AFUA_6G02610	Afu6G02610	Putative uncharacterized protein [Source:UniProtKB/TrEMBL
CADAFUAG00000755	102.965	-0.771272	0.284271	-2.71316	0.00666452	0.0155742	Itra	147	CADAFUAG00000755	AFUA_8G02110	Afu8G02110	Putative uncharacterized protein [Source:UniProtKB/TrEMBL
CADAFUAG00000755	102.965	0.221	0.252666	0.874676	0.38175	0.540977	Isa	147	CADAFUAG00000755	AFUA_8G02110	Afu8G02110	Putative uncharacterized protein [Source:UniProtKB/TrEMBL
CADAFUAG00000756	1300.77	0.96847	0.113211	8.55454	1.18343e-17	1.3445e-16	Itra	147	CADAFUAG00000756	AFUA_8G02550	Afu8G02550	MFS peptide transporter; putative [Source:UniProtKB/TrEMBL
CADAFUAG00000756	1300.77	0.53278	0.104311	5.10764	3.26214e-07	2.00822e-06	Isa	147	CADAFUAG00000756	AFUA_8G02550	Afu8G02550	MFS peptide transporter; putative [Source:UniProtKB/TrEMBL
CADAFUAG00000757	2.00925	3.70237	2.1316	1.7369	0.0824043	0.141194	Itra	147	CADAFUAG00000757	AFUA_8G01980	Afu8G01980	Putative uncharacterized protein [Source:UniProtKB/TrEMBL
CADAFUAG00000757	2.00925	0.575552	1.49201	0.385757	0.699677	NA	Isa	147	CADAFUAG00000757	AFUA_8G01980	Afu8G01980	Putative uncharacterized protein [Source:UniProtKB/TrEMBL
CADAFUAG00000758	217.64	3.48498	0.261147	13.3449	1.26882e-40	4.01979e-39	Itra	147	CADAFUAG00000758	AFUA_8G00410	Afu8G00410	Methionine aminopeptidase 2-1 [Source:UniProtKB/Swiss-Prot
CADAFUAG00000758	217.64	2.77175	0.216601	12.7966	1.71332e-37	7.84666e-36	Isa	147	CADAFUAG00000758	AFUA_8G00410	Afu8G00410	Methionine aminopeptidase 2-1 [Source:UniProtKB/Swiss-Prot
CADAFUAG00000759	24.6033	-1.85968	0.717843	-2.59065	0.00957937	0.0214462	Itra	147	CADAFUAG00000759	AFUA_8G01370	Afu8G01370	CmcJ-like methyltransferase; putative [Source:UniProtKB/TrEMBL
CADAFUAG00000759	24.6033	-1.81461	0.483098	-3.7562	0.000172513	0.000706252	Isa	147	CADAFUAG00000759	AFUA_8G01370	Afu8G01370	CmcJ-like methyltransferase; putative [Source:UniProtKB/TrEMBL
CADAFUAG00000760	714.662	1.30373	0.136999	9.51632	1.79421e-21	2.56265e-20	Itra	147	CADAFUAG00000760	AFUA_8G02180	Afu8G02180	GABA permease; putative [Source:UniProtKB/TrEMBL
CADAFUAG00000760	714.662	-0.341044	0.129878	-2.62587	0.00864269	0.0242487	Isa	147	CADAFUAG00000760	AFUA_8G02180	Afu8G02180	GABA permease; putative [Source:UniProtKB/TrEMBL
CADAFUAG00000761	511.465	-1.87913	0.172454	-10.8965	1.19819e-27	2.2008e-26	Itra	147	CADAFUAG00000761	AFUA_8G01800	Afu8G01800	Thiosulfate sulfurtransferase; putative [Source:UniProtKB/TrEMBL
CADAFUAG00000761	511.465	-1.14659	0.131098	-8.7461	2.20861e-18	3.77169e-17	Isa	147	CADAFUAG00000761	AFUA_8G01800	Afu8G01800	Thiosulfate sulfurtransferase; putative [Source:UniProtKB/TrEMBL
CADAFUAG00000762	62.6293	3.39532	0.433733	7.82814	4.95124e-15	4.65584e-14	Itra	147	CADAFUAG00000762	AFUA_8G00480	Afu8G00480	Phytanoyl-CoA dioxygenase family protein [Source:UniProtKB/TrEMBL
CADAFUAG00000762	62.6293	1.47728	0.34996	4.22128	2.42917e-05	0.00011557	Isa	147	CADAFUAG00000762	AFUA_8G00480	Afu8G00480	Phytanoyl-CoA dioxygenase family protein [Source:UniProtKB/TrEMBL
CADAFUAG00000763	624.609	0.28332	0.156407	1.81143	0.0700749	0.122764	Itra	147	CADAFUAG00000763	AFUA_8G02820	Afu8G02820	Cell cycle checkpoint protein Rad17; putative [Source:UniProtKB/TrEMBL
CADAFUAG00000763	624.609	-0.0261506	0.144152	-0.181409	0.856047	0.917262	Isa	147	CADAFUAG00000763	AFUA_8G02820	Afu8G02820	Cell cycle checkpoint protein Rad17; putative [Source:UniProtKB/TrEMBL
CADAFUAG00000764	8.65316	-1.32589	1.15157	-1.15137	0.249578	0.355824	Itra	147	CADAFUAG00000764	AFUA_8G02610	Afu8G02610	Cytochrome P450 monooxygenase; putative [Source:UniProtKB/TrEMBL
CADAFUAG00000764	8.65316	-0.764121	0.73022	-1.04643	0.295365	0.449541	Isa	147	CADAFUAG00000764	AFUA_8G02610	Afu8G02610	Cytochrome P450 monooxygenase; putative [Source:UniProtKB/TrEMBL
CADAFUAG00000765	13.2882	0.127826	0.707002	0.180799	0.856525	0.900195	Itra	147	CADAFUAG00000765	AFUA_8G00370	Afu8G00370	Polyketide synthase; putative [Source:UniProtKB/TrEMBL
CADAFUAG00000765	13.2882	-0.0161142	0.625455	-0.0257639	0.979446	0.987944	Isa	147	CADAFUAG00000765	AFUA_8G00370	Afu8G00370	Polyketide synthase; putative [Source:UniProtKB/TrEMBL
CADAFUAG00000766	9.75076	0.965946	0.843949	1.14455	0.252394	0.358971	Itra	147	CADAFUAG00000766	AFUA_8G01630	Afu8G01630	Pyridine nucleotide-disulphide oxidoreductase family protein [Source:UniProtKB/TrEMBL
CADAFUAG00000766	9.75076	0.567629	0.706098	0.803895	0.421458	0.58117	Isa	147	CADAFUAG00000766	AFUA_8G01630	Afu8G01630	Pyridine nucleotide-disulphide oxidoreductase family protein [Source:UniProtKB/TrEMBL
CADAFUAG00000767	191.678	2.52913	0.24014	10.5319	6.16001e-26	1.05932e-24	Itra	147	CADAFUAG00000767	AFUA_8G00440	Afu8G00440	Steroid monooxygenase; putative [Source:UniProtKB/TrEMBL
CADAFUAG00000767	191.678	0.848037	0.197438	4.2952	1.74536e-05	8.50166e-05	Isa	147	CADAFUAG00000767	AFUA_8G00440	Afu8G00440	Steroid monooxygenase; putative [Source:UniProtKB/TrEMBL
CADAFUAG00000768	75.6277	1.07067	0.333589	3.20956	0.00132938	0.00362737	Itra	147	CADAFUAG00000768	AFUA_8G02640	Afu8G02640	C6 transcription factor; putative [Source:UniProtKB/TrEMBL
CADAFUAG00000768	75.6277	1.02487	0.302112	3.39235	0.00069296	0.00254919	Isa	147	CADAFUAG00000768	AFUA_8G02640	Afu8G02640	C6 transcription factor; putative [Source:UniProtKB/TrEMBL
CADAFUAG00000769	0.87991	1.7349	2.68605	0.645893	0.518349	0.625624	Itra	147	CADAFUAG00000769	AFUA_8G01500	Afu8G01500	Pfs domain protein; putative [Source:UniProtKB/TrEMBL
CADAFUAG00000769	0.87991	1.23701	2.70768	0.456854	0.647776	NA	Isa	147	CADAFUAG00000769	AFUA_8G01500	Afu8G01500	Pfs domain protein; putative [Source:UniProtKB/TrEMBL
CADAFUAG00000770	11.4806	-0.268716	0.830771	-0.323454	0.746351	0.818291	Itra	147	CADAFUAG00000770	AFUA_8G01440	Afu8G01440	C6 finger domain protein; putative [Source:UniProtKB/TrEMBL
CADAFUAG00000770	11.4806	-0.0860853	0.660271	-0.130379	0.896267	0.939686	Isa	147	CADAFUAG00000770	AFUA_8G01440	Afu8G01440	C6 finger domain protein; putative [Source:UniProtKB/TrEMBL
CADAFUAG00000771	10.2821	-2.16168	1.2622	-1.71262	0.0867821	0.147677	Itra	147	CADAFUAG00000771	AFUA_8G01990	Afu8G01990	C6 transcription factor; putative [Source:UniProtKB/TrEMBL
CADAFUAG00000771	10.2821	0.245549	0.648855	0.378434	0.705108	0.816224	Isa	147	CADAFUAG00000771	AFUA_8G01990	Afu8G01990	C6 transcription factor; putative [Source:UniProtKB/TrEMBL
CADAFUAG00000772	2853.83	0.171378	0.110584	1.54975	0.121201	0.196136	Itra	147	CADAFUAG00000772	AFUA_8G02720	Afu8G02720	Protein phosphatase type 1 complex subunit Hex2/Reg1; putative [Source:UniProtKB/TrEMBL
CADAFUAG00000772	2853.83	-0.916625	0.10562	-8.6785	4.0103e-18	6.73433e-17	Isa	147	CADAFUAG00000772	AFUA_8G02720	Afu8G02720	Protein phosphatase type 1 complex subunit Hex2/Reg1; putative [Source:UniProtKB/TrEMBL
CADAFUAG00000773	17.7302	-0.237828	0.624134	-0.381052	0.703164	0.781285	Itra	147	CADAFUAG00000773	AFUA_8G00710	Afu8G00710	Secreted antimicrobial peptide; putative [Source:UniProtKB/TrEMBL
CADAFUAG00000773	17.7302	-0.380368	0.523627	-0.726409	0.467588	0.622992	Isa	147	CADAFUAG00000773	AFUA_8G00710	Afu8G00710	Secreted antimicrobial peptide; putative [Source:UniProtKB/TrEMBL
CADAFUAG00000774	13.802	-0.291014	0.690298	-0.421578	0.673333	0.757826	Itra	147	CADAFUAG00000774	AFUA_8G02670	Afu8G02670	Putative uncharacterized protein [Source:UniProtKB/TrEMBL
CADAFUAG00000774	13.802	-0.641957	0.6018	-1.06673	0.286095	0.439117	Isa	147	CADAFUAG00000774	AFUA_8G02670	Afu8G02670	Putative uncharacterized protein [Source:UniProtKB/TrEMBL
CADAFUAG00000775	1.32709	0.39247	2.16117	0.181601	0.855896	0.900035	Itra	147	CADAFUAG00000775	AFUA_8G01130	Afu8G01130	Alpha-galactosidase C; putative [Source:UniProtKB/TrEMBL
CADAFUAG00000775	1.32709	1.24562	1.84646	0.674599	0.499931	NA	Isa	147	CADAFUAG00000775	AFUA_8G01130	Afu8G01130	Alpha-galactosidase C; putative [Source:UniProtKB/TrEMBL
CADAFUAG00000776	0	NA	NA	NA	NA	NA	Itra	147	CADAFUAG00000776	AFUA_8G02335	Afu8G02335	Putative uncharacterized protein [Source:UniProtKB/TrEMBL
CADAFUAG00000776	0	NA	NA	NA	NA	NA	Isa	147	CADAFUAG00000776	AFUA_8G02335	Afu8G02335	Putative uncharacterized protein [Source:UniProtKB/TrEMBL
CADAFUAG00000777	600.156	-0.648931	0.149582	-4.33829	1.43598e-05	5.449e-05	Itra	147	CADAFUAG00000777	AFUA_8G02750	Afu8G02750	rRNA-processing protein cgrA [Source:UniProtKB/Swiss-Prot
CADAFUAG00000777	600.156	-0.806741	0.142358	-5.667	1.45322e-08	1.05931e-07	Isa	147	CADAFUAG00000777	AFUA_8G02750	Afu8G02750	rRNA-processing protein cgrA [Source:UniProtKB/Swiss-Prot
CADAFUAG00000778	657.998	1.24708	0.135715	9.18897	3.96608e-20	5.21501e-19	Itra	147	CADAFUAG00000778	AFUA_8G01930	Afu8G01930	Methyltransferase LaeA-like; putative [Source:UniProtKB/TrEMBL
CADAFUAG00000778	657.998	0.227444	0.124543	1.82623	0.0678155	0.141857	Isa	147	CADAFUAG00000778	AFUA_8G01930	Afu8G01930	Methyltransferase LaeA-like; putative [Source:UniProtKB/TrEMBL
CADAFUAG00000779	20.2542	1.27327	0.614161	2.07319	0.0381546	0.0730072	Itra	147	CADAFUAG00000779	AFUA_8G00900	Afu8G00900	Spherulin 4-like cell surface protein; putative [Source:UniProtKB/TrEMBL
CADAFUAG00000779	20.2542	-0.239491	0.492961	-0.485821	0.627094	0.757593	Isa	147	CADAFUAG00000779	AFUA_8G00900	Afu8G00900	Spherulin 4-like cell surface protein; putative [Source:UniProtKB/TrEMBL
CADAFUAG00000780	19.8717	-2.15587	0.663971	-3.24693	0.00116656	0.00322975	Itra	147	CADAFUAG00000780	AFUA_8G02680	Afu8G02680	Putative uncharacterized protein [Source:UniProtKB/TrEMBL
CADAFUAG00000780	19.8717	0.0347099	0.549315	0.0631877	0.949617	0.97202	Isa	147	CADAFUAG00000780	AFUA_8G02680	Afu8G02680	Putative uncharacterized protein [Source:UniProtKB/TrEMBL
CADAFUAG00000781	11.6502	6.17311	1.55364	3.97333	7.08735e-05	0.00024305	Itra	147	CADAFUAG00000781	AFUA_8G00430	Afu8G00430	Putative uncharacterized protein [Source:UniProtKB/TrEMBL
CADAFUAG00000781	11.6502	5.00452	1.64501	3.04224	0.00234821	0.00768999	Isa	147	CADAFUAG00000781	AFUA_8G00430	Afu8G00430	Putative uncharacterized protein [Source:UniProtKB/TrEMBL
CADAFUAG00000782	1.15436	0.813988	2.76054	0.294866	0.768097	0.833972	Itra	147	CADAFUAG00000782	AFUA_8G02240	Afu8G02240	F-box domain protein [Source:UniProtKB/TrEMBL
CADAFUAG00000782	1.15436	2.18962	2.08034	1.05253	0.292557	NA	Isa	147	CADAFUAG00000782	AFUA_8G02240	Afu8G02240	F-box domain protein [Source:UniProtKB/TrEMBL
CADAFUAG00000783	4.42466	-1.3396	1.27467	-1.05094	0.293286	0.405679	Itra	147	CADAFUAG00000783	AFUA_8G00270	Afu8G00270	Putative uncharacterized protein [Source:UniProtKB/TrEMBL
CADAFUAG00000783	4.42466	-0.995582	1.11337	-0.894208	0.37121	0.5296	Isa	147	CADAFUAG00000783	AFUA_8G00270	Afu8G00270	Putative uncharacterized protein [Source:UniProtKB/TrEMBL
CADAFUAG00000784	2071.7	0.370818	0.119873	3.09342	0.00197861	0.00520045	Itra	147	CADAFUAG00000784	AFUA_8G01730	Afu8G01730	Glycosyl transferase family protein [Source:UniProtKB/TrEMBL
CADAFUAG00000784	2071.7	0.319028	0.116169	2.74625	0.00602811	0.0176845	Isa	147	CADAFUAG00000784	AFUA_8G01730	Afu8G01730	Glycosyl transferase family protein [Source:UniProtKB/TrEMBL
CADAFUAG00000785	50.3109	-1.0009	0.406118	-2.46455	0.0137186	0.0294134	Itra	147	CADAFUAG00000785	AFUA_8G00930	Afu8G00930	Chitosanase; putative [Source:UniProtKB/TrEMBL
CADAFUAG00000785	50.3109	0.503239	0.333029	1.5111	0.130764	0.240521	Isa	147	CADAFUAG00000785	AFUA_8G00930	Afu8G00930	Chitosanase; putative [Source:UniProtKB/TrEMBL
CADAFUAG00000786	12.4046	2.80136	0.801162	3.49663	0.000471181	0.00139844	Itra	147	CADAFUAG00000786	AFUA_8G01090	Afu8G01090	Thioredoxin [Source:UniProtKB/TrEMBL
CADAFUAG00000786	12.4046	0.978846	0.788383	1.24159	0.214389	0.351615	Isa	147	CADAFUAG00000786	AFUA_8G01090	Afu8G01090	Thioredoxin [Source:UniProtKB/TrEMBL
CADAFUAG00000787	11.8398	-0.982432	0.790182	-1.2433	0.213758	0.313465	Itra	147	CADAFUAG00000787	AFUA_8G00140	Afu8G00140	MFS transporter; putative [Source:UniProtKB/TrEMBL
CADAFUAG00000787	11.8398	-1.02375	0.70597	-1.45013	0.147023	0.262599	Isa	147	CADAFUAG00000787	AFUA_8G00140	Afu8G00140	MFS transporter; putative [Source:UniProtKB/TrEMBL
CADAFUAG00000788	6.4752	0.960905	1.22421	0.784919	0.432501	0.547939	Itra	147	CADAFUAG00000788	AFUA_8G02290	Afu8G02290	Putative uncharacterized protein [Source:UniProtKB/TrEMBL
CADAFUAG00000788	6.4752	0.509184	0.90391	0.563312	0.573222	0.713812	Isa	147	CADAFUAG00000788	AFUA_8G02290	Afu8G02290	Putative uncharacterized protein [Source:UniProtKB/TrEMBL
CADAFUAG00000789	1.0224	1.30537	2.53664	0.514604	0.60683	0.704771	Itra	147	CADAFUAG00000789	AFUA_8G00110	Afu8G00110	Oxidoreductase; 2OG-Fe(II) oxygenase family; putative [Source:UniProtKB/TrEMBL
CADAFUAG00000789	1.0224	1.50728	2.1721	0.693925	0.48773	NA	Isa	147	CADAFUAG00000789	AFUA_8G00110	Afu8G00110	Oxidoreductase; 2OG-Fe(II) oxygenase family; putative [Source:UniProtKB/TrEMBL
CADAFUAG00000790	37.5535	1.12429	0.444949	2.52679	0.0115109	0.0252262	Itra	147	CADAFUAG00000790	AFUA_8G02350	Afu8G02350	PKS-like enzyme; putative [Source:UniProtKB/TrEMBL
CADAFUAG00000790	37.5535	1.3024	0.387968	3.35697	0.000788029	0.00285948	Isa	147	CADAFUAG00000790	AFUA_8G02350	Afu8G02350	PKS-like enzyme; putative [Source:UniProtKB/TrEMBL
CADAFUAG00000791	10.8055	0.627592	0.867421	0.723514	0.469364	0.582985	Itra	147	CADAFUAG00000791	AFUA_8G01380	Afu8G01380	NB-ARC and TPR domain protein [Source:UniProtKB/TrEMBL
CADAFUAG00000791	10.8055	0.556375	0.732562	0.759492	0.447558	0.604567	Isa	147	CADAFUAG00000791	AFUA_8G01380	Afu8G01380	NB-ARC and TPR domain protein [Source:UniProtKB/TrEMBL
CADAFUAG00000792	6.29569	5.17698	1.72223	3.00597	0.00264736	0.00677154	Itra	147	CADAFUAG00000792	AFUA_8G02340	Afu8G02340	Putative uncharacterized protein [Source:UniProtKB/TrEMBL
CADAFUAG00000792	6.29569	2.04909	0.912313	2.24604	0.0247015	0.060457	Isa	147	CADAFUAG00000792	AFUA_8G02340	Afu8G02340	Putative uncharacterized protein [Source:UniProtKB/TrEMBL
CADAFUAG00000793	1.10728	3.32798	2.61385	1.27321	0.202944	0.300146	Itra	147	CADAFUAG00000793	AFUA_8G01200	Afu8G01200	Putative uncharacterized protein [Source:UniProtKB/TrEMBL
CADAFUAG00000793	1.10728	1.2664	2.29383	0.552091	0.580886	NA	Isa	147	CADAFUAG00000793	AFUA_8G01200	Afu8G01200	Putative uncharacterized protein [Source:UniProtKB/TrEMBL
CADAFUAG00000794	57.4312	-2.84538	0.443937	-6.40942	1.46073e-10	9.67773e-10	Itra	147	CADAFUAG00000794	AFUA_8G02315	Afu8G02315	Putative uncharacterized protein [Source:UniProtKB/TrEMBL
CADAFUAG00000794	57.4312	1.03982	0.322552	3.22373	0.00126534	0.00439791	Isa	147	CADAFUAG00000794	AFUA_8G02315	Afu8G02315	Putative uncharacterized protein [Source:UniProtKB/TrEMBL
CADAFUAG00000795	40.6942	-1.78728	0.485665	-3.68006	0.00023318	0.00073041	Itra	147	CADAFUAG00000795	AFUA_8G01250	Afu8G01250	GNAT family acetyltransferase; putative [Source:UniProtKB/TrEMBL
CADAFUAG00000795	40.6942	-0.00664461	0.361239	-0.018394	0.985325	0.991174	Isa	147	CADAFUAG00000795	AFUA_8G01250	Afu8G01250	GNAT family acetyltransferase; putative [Source:UniProtKB/TrEMBL
CADAFUAG00000796	772.791	-0.265389	0.132723	-1.99957	0.0455468	0.0849243	Itra	147	CADAFUAG00000796	AFUA_8G00790	Afu8G00790	Putative uncharacterized protein [Source:UniProtKB/TrEMBL
CADAFUAG00000796	772.791	-0.237518	0.131578	-1.80515	0.0710512	0.147638	Isa	147	CADAFUAG00000796	AFUA_8G00790	Afu8G00790	Putative uncharacterized protein [Source:UniProtKB/TrEMBL
CADAFUAG00000797	147.687	0.302081	0.235782	1.28119	0.200127	0.296749	Itra	147	CADAFUAG00000797	AFUA_8G02770	Afu8G02770	Cytidine deaminase; putative [Source:UniProtKB/TrEMBL
CADAFUAG00000797	147.687	0.166919	0.219174	0.761584	0.446308	0.603868	Isa	147	CADAFUAG00000797	AFUA_8G02770	Afu8G02770	Cytidine deaminase; putative [Source:UniProtKB/TrEMBL
CADAFUAG00000798	554.264	-0.107356	0.15608	-0.687823	0.491564	0.602439	Itra	147	CADAFUAG00000798	AFUA_8G02790	Afu8G02790	Exocyst complex component Sec10; putative [Source:UniProtKB/TrEMBL
CADAFUAG00000798	554.264	-0.295501	0.134237	-2.20134	0.0277121	0.0667732	Isa	147	CADAFUAG00000798	AFUA_8G02790	Afu8G02790	Exocyst complex component Sec10; putative [Source:UniProtKB/TrEMBL
CADAFUAG00000799	314836	1.28815	0.0845188	15.241	1.89005e-52	8.37747e-51	Itra	147	CADAFUAG00000799	AFUA_8G01690	Afu8G01690	Putative uncharacterized protein [Source:UniProtKB/TrEMBL
CADAFUAG00000799	314836	0.13297	0.0844851	1.57389	0.115512	0.218177	Isa	147	CADAFUAG00000799	AFUA_8G01690	Afu8G01690	Putative uncharacterized protein [Source:UniProtKB/TrEMBL
CADAFUAG00000800	12.5673	-2.24644	0.832529	-2.69833	0.0069689	0.0162133	Itra	147	CADAFUAG00000800	AFUA_8G00660	Afu8G00660	Solute transporter; putative [Source:UniProtKB/TrEMBL
CADAFUAG00000800	12.5673	-2.81191	0.889838	-3.16002	0.00157757	0.00535181	Isa	147	CADAFUAG00000800	AFUA_8G00660	Afu8G00660	Solute transporter; putative [Source:UniProtKB/TrEMBL
CADAFUAG00000801	1792.35	0.943736	0.113243	8.33371	7.8348e-17	8.33916e-16	Itra	147	CADAFUAG00000801	AFUA_8G00962	Afu8G00962	Cytochrome P450; putative [Source:UniProtKB/TrEMBL
CADAFUAG00000801	1792.35	0.256008	0.106262	2.40921	0.0159873	0.0414208	Isa	147	CADAFUAG00000801	AFUA_8G00962	Afu8G00962	Cytochrome P450; putative [Source:UniProtKB/TrEMBL
CADAFUAG00000802	443.406	4.90828	0.226516	21.6686	4.0633e-104	6.3936e-102	Itra	147	CADAFUAG00000802	AFUA_8G02060	Afu8G02060	Glycan biosynthesis protein (PigL); putative [Source:UniProtKB/TrEMBL
CADAFUAG00000802	443.406	2.74936	0.176521	15.5752	1.07255e-54	1.0458e-52	Isa	147	CADAFUAG00000802	AFUA_8G02060	Afu8G02060	Glycan biosynthesis protein (PigL); putative [Source:UniProtKB/TrEMBL
CADAFUAG00000803	0.277925	0.813801	4.83136	0.168441	0.866236	NA	Itra	147	CADAFUAG00000803	AFUA_8G01000	Afu8G01000	Ankyrin repeat protein [Source:UniProtKB/TrEMBL
CADAFUAG00000803	0.277925	-3.24153	4.66628	-0.69467	0.487262	NA	Isa	147	CADAFUAG00000803	AFUA_8G01000	Afu8G01000	Ankyrin repeat protein [Source:UniProtKB/TrEMBL
CADAFUAG00000804	45.7087	-5.15373	0.892195	-5.77646	7.6289e-09	4.23922e-08	Itra	147	CADAFUAG00000804	AFUA_8G01290	Afu8G01290	Putative uncharacterized protein [Source:UniProtKB/TrEMBL
CADAFUAG00000804	45.7087	-1.23428	0.372668	-3.312	0.000926321	0.00330964	Isa	147	CADAFUAG00000804	AFUA_8G01290	Afu8G01290	Putative uncharacterized protein [Source:UniProtKB/TrEMBL
CADAFUAG00000805	356.123	0.534787	0.169089	3.16276	0.00156282	0.00420359	Itra	147	CADAFUAG00000805	AFUA_8G02460	Afu8G02460	MFS transporter; putative [Source:UniProtKB/TrEMBL
CADAFUAG00000805	356.123	-0.147822	0.14222	-1.03939	0.298625	0.45321	Isa	147	CADAFUAG00000805	AFUA_8G02460	Afu8G02460	MFS transporter; putative [Source:UniProtKB/TrEMBL
CADAFUAG00000806	277.059	1.44143	0.207168	6.95778	3.45665e-12	2.60033e-11	Itra	147	CADAFUAG00000806	AFUA_8G02470	Afu8G02470	Trihydroxytoluene oxygenase [Source:UniProtKB/TrEMBL
CADAFUAG00000806	277.059	-0.0505306	0.192046	-0.263116	0.792461	0.876559	Isa	147	CADAFUAG00000806	AFUA_8G02470	Afu8G02470	Trihydroxytoluene oxygenase [Source:UniProtKB/TrEMBL
CADAFUAG00000807	0.237531	-0.568457	4.98664	-0.113996	0.909241	NA	Itra	147	CADAFUAG00000807	AFUA_8G00630	Afu8G00630	Putative uncharacterized protein [Source:UniProtKB/TrEMBL
CADAFUAG00000807	0.237531	1.91588	4.96063	0.386217	0.699336	NA	Isa	147	CADAFUAG00000807	AFUA_8G00630	Afu8G00630	Putative uncharacterized protein [Source:UniProtKB/TrEMBL
CADAFUAG00000808	0.582174	0.459708	3.47076	0.132452	0.894627	0.929581	Itra	147	CADAFUAG00000808	AFUA_8G01950	Afu8G01950	Putative uncharacterized protein [Source:UniProtKB/TrEMBL
CADAFUAG00000808	0.582174	0.216494	3.69192	0.05864	0.953239	NA	Isa	147	CADAFUAG00000808	AFUA_8G01950	Afu8G01950	Putative uncharacterized protein [Source:UniProtKB/TrEMBL
CADAFUAG00000809	43.5164	-1.06765	0.446219	-2.39265	0.016727	0.0352029	Itra	147	CADAFUAG00000809	AFUA_8G02010	Afu8G02010	MFS sugar transporter; putative [Source:UniProtKB/TrEMBL
CADAFUAG00000809	43.5164	-1.33637	0.388072	-3.44361	0.00057401	0.00214026	Isa	147	CADAFUAG00000809	AFUA_8G02010	Afu8G02010	MFS sugar transporter; putative [Source:UniProtKB/TrEMBL
CADAFUAG00000810	3.66734	-0.49865	1.40489	-0.354939	0.722635	0.797568	Itra	147	CADAFUAG00000810	AFUA_8G01550	Afu8G01550	Oxidoreductase; short chain dehydrogenase/reductase family superfamily [Source:UniProtKB/TrEMBL
CADAFUAG00000810	3.66734	0.0995957	1.25186	0.0795581	0.936589	0.964599	Isa	147	CADAFUAG00000810	AFUA_8G01550	Afu8G01550	Oxidoreductase; short chain dehydrogenase/reductase family superfamily [Source:UniProtKB/TrEMBL
CADAFUAG00000811	3.75086	0.569696	1.36149	0.418436	0.675628	0.759449	Itra	147	CADAFUAG00000811	AFUA_8G01320	Afu8G01320	Putative uncharacterized protein [Source:UniProtKB/TrEMBL
CADAFUAG00000811	3.75086	-0.0656774	1.12715	-0.0582685	0.953535	0.97449	Isa	147	CADAFUAG00000811	AFUA_8G01320	Afu8G01320	Putative uncharacterized protein [Source:UniProtKB/TrEMBL
CADAFUAG00000812	0.231341	0.813982	4.78675	0.170049	0.864971	NA	Itra	147	CADAFUAG00000812	AFUA_8G01460	Afu8G01460	Putative uncharacterized protein [Source:UniProtKB/TrEMBL
CADAFUAG00000812	0.231341	1.25848	4.67484	0.269202	0.787775	NA	Isa	147	CADAFUAG00000812	AFUA_8G01460	Afu8G01460	Putative uncharacterized protein [Source:UniProtKB/TrEMBL
CADAFUAG00000813	79.228	-1.1665	0.323184	-3.60941	0.000306891	0.000941006	Itra	147	CADAFUAG00000813	AFUA_8G00700	Afu8G00700	Class III chitinase ChiA2 [Source:UniProtKB/TrEMBL
CADAFUAG00000813	79.228	-0.649001	0.283803	-2.2868	0.0222076	0.0551572	Isa	147	CADAFUAG00000813	AFUA_8G00700	Afu8G00700	Class III chitinase ChiA2 [Source:UniProtKB/TrEMBL
CADAFUAG00000814	826.573	1.87764	0.13654	13.7516	4.9811e-43	1.66172e-41	Itra	147	CADAFUAG00000814	AFUA_8G00470	Afu8G00470	Putative uncharacterized protein [Source:UniProtKB/TrEMBL
CADAFUAG00000814	826.573	0.439136	0.126431	3.47334	0.000514031	0.00192854	Isa	147	CADAFUAG00000814	AFUA_8G00470	Afu8G00470	Putative uncharacterized protein [Source:UniProtKB/TrEMBL
CADAFUAG00000815	8.29591	2.1412	1.19205	1.79623	0.0724581	0.126493	Itra	147	CADAFUAG00000815	AFUA_8G01010	Afu8G01010	Thermophilic desulfurizing enzyme family protein [Source:UniProtKB/TrEMBL
CADAFUAG00000815	8.29591	0.20463	0.757613	0.270098	0.787085	0.872792	Isa	147	CADAFUAG00000815	AFUA_8G01010	Afu8G01010	Thermophilic desulfurizing enzyme family protein [Source:UniProtKB/TrEMBL
CADAFUAG00000816	209.374	-0.760737	0.195445	-3.89233	9.92857e-05	0.000332868	Itra	147	CADAFUAG00000816	AFUA_8G00650	Afu8G00650	LPS glycosyltransferase; putative [Source:UniProtKB/TrEMBL
CADAFUAG00000816	209.374	-1.62054	0.198476	-8.1649	3.21696e-16	4.74331e-15	Isa	147	CADAFUAG00000816	AFUA_8G00650	Afu8G00650	LPS glycosyltransferase; putative [Source:UniProtKB/TrEMBL
CADAFUAG00000817	8.53138	2.44247	0.996863	2.45015	0.0142795	0.03048	Itra	147	CADAFUAG00000817	AFUA_8G00490	Afu8G00490	PKS-like enzyme; putative [Source:UniProtKB/TrEMBL
CADAFUAG00000817	8.53138	0.622283	0.818986	0.759822	0.447361	0.604567	Isa	147	CADAFUAG00000817	AFUA_8G00490	Afu8G00490	PKS-like enzyme; putative [Source:UniProtKB/TrEMBL
CADAFUAG00000818	9.83024	-0.149468	0.872818	-0.171247	0.864029	0.906165	Itra	147	CADAFUAG00000818	AFUA_8G01410	Afu8G01410	Class V chitinase ChiB1 [Source:UniProtKB/TrEMBL
CADAFUAG00000818	9.83024	-0.0559523	0.715886	-0.078158	0.937702	0.96531	Isa	147	CADAFUAG00000818	AFUA_8G01410	Afu8G01410	Class V chitinase ChiB1 [Source:UniProtKB/TrEMBL
CADAFUAG00000819	85.5646	2.92399	0.347789	8.40737	4.19307e-17	4.57122e-16	Itra	147	CADAFUAG00000819	AFUA_8G02500	Afu8G02500	Glutathione S-transferase [Source:UniProtKB/TrEMBL
CADAFUAG00000819	85.5646	0.850433	0.307476	2.76586	0.00567733	0.0167367	Isa	147	CADAFUAG00000819	AFUA_8G02500	Afu8G02500	Glutathione S-transferase [Source:UniProtKB/TrEMBL
CADAFUAG00000820	12.2707	1.37901	0.729583	1.89014	0.0587393	0.105751	Itra	147	CADAFUAG00000820	AFUA_8G02210	Afu8G02210	Alpha-ketoglutarate-dependent taurine dioxygenase [Source:UniProtKB/TrEMBL
CADAFUAG00000820	12.2707	-0.591863	0.730308	-0.810428	0.417694	0.577738	Isa	147	CADAFUAG00000820	AFUA_8G02210	Afu8G02210	Alpha-ketoglutarate-dependent taurine dioxygenase [Source:UniProtKB/TrEMBL
CADAFUAG00000821	35.426	-0.570429	0.5271	-1.0822	0.279163	0.389522	Itra	147	CADAFUAG00000821	AFUA_8G01030	Afu8G01030	Putative uncharacterized protein [Source:UniProtKB/TrEMBL
CADAFUAG00000821	35.426	-1.33649	0.382175	-3.49706	0.000470415	0.00177961	Isa	147	CADAFUAG00000821	AFUA_8G01030	Afu8G01030	Putative uncharacterized protein [Source:UniProtKB/TrEMBL
CADAFUAG00000822	481.766	0.442571	0.154913	2.8569	0.00427797	0.0104742	Itra	147	CADAFUAG00000822	AFUA_8G01070	Afu8G01070	Sterol desaturase; putative [Source:UniProtKB/TrEMBL
CADAFUAG00000822	481.766	0.294363	0.13131	2.24173	0.0249786	0.0610369	Isa	147	CADAFUAG00000822	AFUA_8G01070	Afu8G01070	Sterol desaturase; putative [Source:UniProtKB/TrEMBL
CADAFUAG00000823	1.47286	-0.591184	2.61667	-0.22593	0.821256	0.874321	Itra	147	CADAFUAG00000823	AFUA_8G02260	Afu8G02260	Neutral amino acid permease [Source:UniProtKB/TrEMBL
CADAFUAG00000823	1.47286	0.575236	1.81168	0.317515	0.750853	NA	Isa	147	CADAFUAG00000823	AFUA_8G02260	Afu8G02260	Neutral amino acid permease [Source:UniProtKB/TrEMBL
CADAFUAG00000824	2.48576	-0.439884	1.81499	-0.242361	0.8085	0.865166	Itra	147	CADAFUAG00000824	AFUA_8G01810	Afu8G01810	Putative uncharacterized protein [Source:UniProtKB/TrEMBL
CADAFUAG00000824	2.48576	-1.6678	1.43359	-1.16338	0.244677	NA	Isa	147	CADAFUAG00000824	AFUA_8G01810	Afu8G01810	Putative uncharacterized protein [Source:UniProtKB/TrEMBL
CADAFUAG00000825	0.164179	0	4.99746	0	1	NA	Itra	147	CADAFUAG00000825	AFUA_8G02230	Afu8G02230	Serine-leucine-rich repeat protein [Source:UniProtKB/TrEMBL
CADAFUAG00000825	0.164179	2.69241	4.89204	0.550367	0.582068	NA	Isa	147	CADAFUAG00000825	AFUA_8G02230	Afu8G02230	Serine-leucine-rich repeat protein [Source:UniProtKB/TrEMBL
CADAFUAG00000826	6.03486	4.18541	1.38818	3.01504	0.00256942	0.00659165	Itra	147	CADAFUAG00000826	AFUA_8G00580	Afu8G00580	Glutathione S-transferase; putative [Source:UniProtKB/TrEMBL
CADAFUAG00000826	6.03486	-1.03115	1.45787	-0.707296	0.479382	0.633126	Isa	147	CADAFUAG00000826	AFUA_8G00580	Afu8G00580	Glutathione S-transferase; putative [Source:UniProtKB/TrEMBL
CADAFUAG00000827	286.313	0.316323	0.217557	1.45398	0.145952	0.228702	Itra	147	CADAFUAG00000827	AFUA_8G02200	Afu8G02200	Proline permease; putative [Source:UniProtKB/TrEMBL
CADAFUAG00000827	286.313	0.232044	0.194849	1.19089	0.233698	0.376006	Isa	147	CADAFUAG00000827	AFUA_8G02200	Afu8G02200	Proline permease; putative [Source:UniProtKB/TrEMBL
CADAFUAG00000828	2050.34	-0.630847	0.109352	-5.76894	7.97738e-09	4.42246e-08	Itra	147	CADAFUAG00000828	AFUA_8G02850	Afu8G02850	Actin binding protein; putative [Source:UniProtKB/TrEMBL
CADAFUAG00000828	2050.34	-0.771328	0.102053	-7.55809	4.09016e-14	4.98516e-13	Isa	147	CADAFUAG00000828	AFUA_8G02850	Afu8G02850	Actin binding protein; putative [Source:UniProtKB/TrEMBL
CADAFUAG00000829	87.7168	-0.52614	0.293013	-1.79562	0.0725549	0.126639	Itra	147	CADAFUAG00000829	AFUA_8G01400	Afu8G01400	Mitochondrial carrier protein (Pet8); putative [Source:UniProtKB/TrEMBL
CADAFUAG00000829	87.7168	-0.088968	0.256484	-0.346875	0.728685	0.831787	Isa	147	CADAFUAG00000829	AFUA_8G01400	Afu8G01400	Mitochondrial carrier protein (Pet8); putative [Source:UniProtKB/TrEMBL
CADAFUAG00000830	2.31821	2.28042	2.04165	1.11695	0.264016	0.372415	Itra	147	CADAFUAG00000830	AFUA_8G02310	Afu8G02310	Aldehyde dehydrogenase ALDH [Source:UniProtKB/TrEMBL
CADAFUAG00000830	2.31821	0.274661	1.38396	0.198461	0.842685	NA	Isa	147	CADAFUAG00000830	AFUA_8G02310	Afu8G02310	Aldehyde dehydrogenase ALDH [Source:UniProtKB/TrEMBL
CADAFUAG00000831	7.02863	2.22614	1.05274	2.11461	0.0344629	0.0667096	Itra	147	CADAFUAG00000831	AFUA_8G01580	Afu8G01580	Aminotransferase; classes I and II family [Source:UniProtKB/TrEMBL
CADAFUAG00000831	7.02863	0.0643796	0.885097	0.0727374	0.942015	0.967625	Isa	147	CADAFUAG00000831	AFUA_8G01580	Afu8G01580	Aminotransferase; classes I and II family [Source:UniProtKB/TrEMBL
CADAFUAG00000832	260.254	6.32042	0.412962	15.3051	7.06836e-53	3.19294e-51	Itra	147	CADAFUAG00000832	AFUA_8G00620	Afu8G00620	Dimethylallyl tryptophan synthase; putative [Source:UniProtKB/TrEMBL
CADAFUAG00000832	260.254	4.06043	0.25865	15.6985	1.54783e-55	1.55952e-53	Isa	147	CADAFUAG00000832	AFUA_8G00620	Afu8G00620	Dimethylallyl tryptophan synthase; putative [Source:UniProtKB/TrEMBL
CADAFUAG00000833	37.7793	1.5963	0.45816	3.48416	0.000493685	0.00146201	Itra	147	CADAFUAG00000833	AFUA_8G01760	Afu8G01760	Putative uncharacterized protein [Source:UniProtKB/TrEMBL
CADAFUAG00000833	37.7793	-0.376894	0.381662	-0.987508	0.323394	0.479957	Isa	147	CADAFUAG00000833	AFUA_8G01760	Afu8G01760	Putative uncharacterized protein [Source:UniProtKB/TrEMBL
CADAFUAG00000834	22.083	0.00467107	0.542933	0.0086034	0.993136	0.99535	Itra	147	CADAFUAG00000834	AFUA_8G00770	Afu8G00770	Sugar transporter family protein [Source:UniProtKB/TrEMBL
CADAFUAG00000834	22.083	-1.21201	0.5692	-2.12933	0.033227	0.0778842	Isa	147	CADAFUAG00000834	AFUA_8G00770	Afu8G00770	Sugar transporter family protein [Source:UniProtKB/TrEMBL
CADAFUAG00000835	547.068	0.0101565	0.146694	0.069236	0.944802	0.962749	Itra	147	CADAFUAG00000835	AFUA_8G00730	Afu8G00730	Transcription regulator (RTG2); putative [Source:UniProtKB/TrEMBL
CADAFUAG00000835	547.068	-0.250968	0.128327	-1.9557	0.050501	0.110918	Isa	147	CADAFUAG00000835	AFUA_8G00730	Afu8G00730	Transcription regulator (RTG2); putative [Source:UniProtKB/TrEMBL
CADAFUAG00000836	1.5863	1.61712	4.72536	0.342221	0.732185	0.805565	Itra	147	CADAFUAG00000836	AFUA_8G00570	Afu8G00570	Alpha/beta hydrolase; putative [Source:UniProtKB/TrEMBL
CADAFUAG00000836	1.5863	-2.19654	4.89426	-0.4488	0.653576	NA	Isa	147	CADAFUAG00000836	AFUA_8G00570	Afu8G00570	Alpha/beta hydrolase; putative [Source:UniProtKB/TrEMBL
CADAFUAG00000837	3139.43	2.21829	0.131574	16.8597	8.90675e-64	5.64353e-62	Itra	147	CADAFUAG00000837	AFUA_8G02120	Afu8G02120	Putative uncharacterized protein [Source:UniProtKB/TrEMBL
CADAFUAG00000837	3139.43	1.53397	0.130827	11.7251	9.4743e-32	3.39577e-30	Isa	147	CADAFUAG00000837	AFUA_8G02120	Afu8G02120	Putative uncharacterized protein [Source:UniProtKB/TrEMBL
CADAFUAG00000838	260.452	0.0878264	0.195008	0.450373	0.652442	0.741865	Itra	147	CADAFUAG00000838	AFUA_8G02690	Afu8G02690	Glucose N-acetyltransferase 1 [Source:UniProtKB/Swiss-Prot
CADAFUAG00000838	260.452	-0.0124483	0.179694	-0.0692752	0.944771	0.969208	Isa	147	CADAFUAG00000838	AFUA_8G02690	Afu8G02690	Glucose N-acetyltransferase 1 [Source:UniProtKB/Swiss-Prot
CADAFUAG00000839	51.5185	2.50684	0.42978	5.83283	5.44937e-09	3.07149e-08	Itra	147	CADAFUAG00000839	AFUA_8G01820	Afu8G01820	Putative uncharacterized protein [Source:UniProtKB/TrEMBL
CADAFUAG00000839	51.5185	1.79475	0.337276	5.32133	1.03014e-07	6.78875e-07	Isa	147	CADAFUAG00000839	AFUA_8G01820	Afu8G01820	Putative uncharacterized protein [Source:UniProtKB/TrEMBL
CADAFUAG00000840	86.0486	1.80654	0.308213	5.86132	4.59208e-09	2.60696e-08	Itra	147	CADAFUAG00000840	AFUA_8G02590	Afu8G02590	Lipase/thioesterase family protein [Source:UniProtKB/TrEMBL
CADAFUAG00000840	86.0486	2.34518	0.287894	8.14599	3.76197e-16	5.51999e-15	Isa	147	CADAFUAG00000840	AFUA_8G02590	Afu8G02590	Lipase/thioesterase family protein [Source:UniProtKB/TrEMBL
CADAFUAG00000841	9.72408	0.293918	0.918442	0.320018	0.748955	0.819908	Itra	147	CADAFUAG00000841	AFUA_8G01160	Afu8G01160	Tartrate dehydrogenase; putative [Source:UniProtKB/TrEMBL
CADAFUAG00000841	9.72408	-0.258056	0.709635	-0.363646	0.716122	0.824441	Isa	147	CADAFUAG00000841	AFUA_8G01160	Afu8G01160	Tartrate dehydrogenase; putative [Source:UniProtKB/TrEMBL
CADAFUAG00000842	50.7104	0.997105	0.426557	2.33756	0.0194099	0.0401246	Itra	147	CADAFUAG00000842	AFUA_8G01360	Afu8G01360	Putative uncharacterized protein [Source:UniProtKB/TrEMBL
CADAFUAG00000842	50.7104	-0.269901	0.39817	-0.677855	0.497864	0.649587	Isa	147	CADAFUAG00000842	AFUA_8G01360	Afu8G01360	Putative uncharacterized protein [Source:UniProtKB/TrEMBL
CADAFUAG00000843	4.12327	-0.70403	1.34859	-0.522048	0.601637	0.700031	Itra	147	CADAFUAG00000843	AFUA_8G02600	Afu8G02600	Short-chain dehydrogenase/reductase 2; putative [Source:UniProtKB/TrEMBL
CADAFUAG00000843	4.12327	2.77965	1.22904	2.26164	0.0237194	0.0584955	Isa	147	CADAFUAG00000843	AFUA_8G02600	Afu8G02600	Short-chain dehydrogenase/reductase 2; putative [Source:UniProtKB/TrEMBL
CADAFUAG00000844	760.204	0.128398	0.146102	0.878827	0.379495	0.495	Itra	147	CADAFUAG00000844	AFUA_8G00780	Afu8G00780	Putative uncharacterized protein [Source:UniProtKB/TrEMBL
CADAFUAG00000844	760.204	-0.5591	0.130616	-4.28049	1.86483e-05	9.0044e-05	Isa	147	CADAFUAG00000844	AFUA_8G00780	Afu8G00780	Putative uncharacterized protein [Source:UniProtKB/TrEMBL
CADAFUAG00000845	24.0184	-0.365052	0.583443	-0.625685	0.531521	0.636571	Itra	147	CADAFUAG00000845	AFUA_8G02540	Afu8G02540	Putative uncharacterized protein [Source:UniProtKB/TrEMBL
CADAFUAG00000845	24.0184	0.576972	0.435169	1.32586	0.184887	0.313727	Isa	147	CADAFUAG00000845	AFUA_8G02540	Afu8G02540	Putative uncharacterized protein [Source:UniProtKB/TrEMBL
CADAFUAG00000846	61.8982	-2.53774	0.417218	-6.08252	1.18305e-09	7.24798e-09	Itra	147	CADAFUAG00000846	AFUA_8G00680	Afu8G00680	Glycosyl transferase; putative [Source:UniProtKB/TrEMBL
CADAFUAG00000846	61.8982	-2.37957	0.346328	-6.87084	6.38269e-12	6.55473e-11	Isa	147	CADAFUAG00000846	AFUA_8G00680	Afu8G00680	Glycosyl transferase; putative [Source:UniProtKB/TrEMBL
CADAFUAG00000847	5.25119	0.068899	1.10715	0.0622311	0.950379	0.966971	Itra	147	CADAFUAG00000847	AFUA_8G00130	Afu8G00130	Putative uncharacterized protein [Source:UniProtKB/TrEMBL
CADAFUAG00000847	5.25119	-1.13878	1.05219	-1.0823	0.279121	0.431114	Isa	147	CADAFUAG00000847	AFUA_8G00130	Afu8G00130	Putative uncharacterized protein [Source:UniProtKB/TrEMBL
CADAFUAG00000848	171.335	-0.592216	0.24674	-2.40016	0.0163879	0.0345816	Itra	147	CADAFUAG00000848	AFUA_8G00540	Afu8G00540	Nonribosomal peptide synthetase 14 [Source:UniProtKB/Swiss-Prot
CADAFUAG00000848	171.335	-2.17713	0.201903	-10.783	4.14085e-27	1.15893e-25	Isa	147	CADAFUAG00000848	AFUA_8G00540	Afu8G00540	Nonribosomal peptide synthetase 14 [Source:UniProtKB/Swiss-Prot
CADAFUAG00000849	2.82524	-0.196272	1.66987	-0.117538	0.906434	0.937269	Itra	147	CADAFUAG00000849	AFUA_8G02150	Afu8G02150	Acetylornithine aminotransferase; putative [Source:UniProtKB/TrEMBL
CADAFUAG00000849	2.82524	0.341681	1.26693	0.269692	0.787397	NA	Isa	147	CADAFUAG00000849	AFUA_8G02150	Afu8G02150	Acetylornithine aminotransferase; putative [Source:UniProtKB/TrEMBL
CADAFUAG00000850	74.5729	0.0244378	0.348172	0.070189	0.944043	0.962365	Itra	147	CADAFUAG00000850	AFUA_8G01330	Afu8G01330	Putative uncharacterized protein [Source:UniProtKB/TrEMBL		DMSO down
CADAFUAG00000850	74.5729	-0.439564	0.263521	-1.66804	0.0953073	0.187229	Isa	147	CADAFUAG00000850	AFUA_8G01330	Afu8G01330	Putative uncharacterized protein [Source:UniProtKB/TrEMBL		DMSO down
CADAFUAG00000851	29.5113	-3.24538	0.763175	-4.25248	2.1142e-05	7.80914e-05	Itra	147	CADAFUAG00000851	AFUA_8G02000	Afu8G02000	Sorbitol/xylitol dehydrogenase; putative [Source:UniProtKB/TrEMBL
CADAFUAG00000851	29.5113	-1.45996	0.425644	-3.42999	0.000603598	0.00224229	Isa	147	CADAFUAG00000851	AFUA_8G02000	Afu8G02000	Sorbitol/xylitol dehydrogenase; putative [Source:UniProtKB/TrEMBL
CADAFUAG00000852	32.2932	-0.220545	0.517974	-0.425784	0.670266	0.755696	Itra	147	CADAFUAG00000852	AFUA_8G00260	Afu8G00260	F-box domain and ankyrin repeat protein [Source:UniProtKB/TrEMBL
CADAFUAG00000852	32.2932	-0.57556	0.391415	-1.47046	0.141437	0.255234	Isa	147	CADAFUAG00000852	AFUA_8G00260	Afu8G00260	F-box domain and ankyrin repeat protein [Source:UniProtKB/TrEMBL
CADAFUAG00000853	24.7676	-1.354	0.587748	-2.3037	0.0212393	0.0434779	Itra	147	CADAFUAG00000853	AFUA_8G01240	Afu8G01240	C6 transcription factor; putative [Source:UniProtKB/TrEMBL
CADAFUAG00000853	24.7676	-0.123696	0.434762	-0.284515	0.776016	0.865229	Isa	147	CADAFUAG00000853	AFUA_8G01240	Afu8G01240	C6 transcription factor; putative [Source:UniProtKB/TrEMBL
CADAFUAG00000854	40.3554	-6.32043	1.29777	-4.87021	1.11481e-06	4.8614e-06	Itra	147	CADAFUAG00000854	AFUA_8G01660	Afu8G01660	Putative uncharacterized protein [Source:UniProtKB/TrEMBL
CADAFUAG00000854	40.3554	-1.73624	0.383226	-4.5306	5.88169e-06	3.0901e-05	Isa	147	CADAFUAG00000854	AFUA_8G01660	Afu8G01660	Putative uncharacterized protein [Source:UniProtKB/TrEMBL
CADAFUAG00000855	17.9826	-0.556151	0.63944	-0.869747	0.384439	0.499792	Itra	147	CADAFUAG00000855	AFUA_8G01720	Afu8G01720	Putative uncharacterized protein [Source:UniProtKB/TrEMBL
CADAFUAG00000855	17.9826	0.985344	0.611014	1.61264	0.106823	0.205184	Isa	147	CADAFUAG00000855	AFUA_8G01720	Afu8G01720	Putative uncharacterized protein [Source:UniProtKB/TrEMBL
CADAFUAG00000856	40513.2	1.00289	0.13425	7.47032	7.99992e-14	6.91642e-13	Itra	147	CADAFUAG00000856	AFUA_8G01710	Afu8G01710	Antigenic thaumatin domain protein; putative [Source:UniProtKB/TrEMBL
CADAFUAG00000856	40513.2	3.19561	0.133685	23.9041	2.77352e-126	2.28639e-123	Isa	147	CADAFUAG00000856	AFUA_8G01710	Afu8G01710	Antigenic thaumatin domain protein; putative [Source:UniProtKB/TrEMBL
CADAFUAG00000857	2950.46	1.16038	0.135209	8.58208	9.31763e-18	1.07147e-16	Itra	147	CADAFUAG00000857	AFUA_8G00840	Afu8G00840	Amino acid permease; putative [Source:UniProtKB/TrEMBL
CADAFUAG00000857	2950.46	1.02404	0.131593	7.78183	7.1485e-15	9.36742e-14	Isa	147	CADAFUAG00000857	AFUA_8G00840	Afu8G00840	Amino acid permease; putative [Source:UniProtKB/TrEMBL
CADAFUAG00000858	104.259	-2.4275	0.43434	-5.58894	2.28464e-08	1.2186e-07	Itra	147	CADAFUAG00000858	AFUA_8G02490	Afu8G02490	Putative uncharacterized protein [Source:UniProtKB/TrEMBL
CADAFUAG00000858	104.259	-0.985459	0.239355	-4.11715	3.83594e-05	0.000176034	Isa	147	CADAFUAG00000858	AFUA_8G02490	Afu8G02490	Putative uncharacterized protein [Source:UniProtKB/TrEMBL
CADAFUAG00000859	6.40511	0.685264	0.953701	0.718531	0.47243	0.585867	Itra	147	CADAFUAG00000859	AFUA_8G00750	Afu8G00750	C2H2 transcription factor; putative [Source:UniProtKB/TrEMBL
CADAFUAG00000859	6.40511	0.246354	0.957795	0.25721	0.797017	0.879347	Isa	147	CADAFUAG00000859	AFUA_8G00750	Afu8G00750	C2H2 transcription factor; putative [Source:UniProtKB/TrEMBL
CADAFUAG00000860	4.10139	0.440613	1.45927	0.301941	0.762697	0.830139	Itra	147	CADAFUAG00000860	AFUA_8G00810	Afu8G00810	Putative uncharacterized protein [Source:UniProtKB/TrEMBL
CADAFUAG00000860	4.10139	1.17172	1.07633	1.08862	0.276321	0.427956	Isa	147	CADAFUAG00000860	AFUA_8G00810	Afu8G00810	Putative uncharacterized protein [Source:UniProtKB/TrEMBL
CADAFUAG00000861	572.771	3.93281	0.216874	18.1341	1.71445e-73	1.36018e-71	Itra	147	CADAFUAG00000861	AFUA_8G02050	Afu8G02050	Putative uncharacterized protein [Source:UniProtKB/TrEMBL
CADAFUAG00000861	572.771	2.15937	0.194957	11.0761	1.63777e-28	5.06871e-27	Isa	147	CADAFUAG00000861	AFUA_8G02050	Afu8G02050	Putative uncharacterized protein [Source:UniProtKB/TrEMBL
CADAFUAG00000862	31.6476	0.698656	0.461375	1.51429	0.129952	0.207957	Itra	147	CADAFUAG00000862	AFUA_8G00190	Afu8G00190	Cytochrome P450; putative [Source:UniProtKB/TrEMBL
CADAFUAG00000862	31.6476	-0.0754977	0.41919	-0.180104	0.857071	0.918016	Isa	147	CADAFUAG00000862	AFUA_8G00190	Afu8G00190	Cytochrome P450; putative [Source:UniProtKB/TrEMBL
CADAFUAG00000863	246.977	0.462391	0.183709	2.51698	0.0118366	0.0257664	Itra	147	CADAFUAG00000863	AFUA_8G01680	Afu8G01680	Putative uncharacterized protein [Source:UniProtKB/TrEMBL
CADAFUAG00000863	246.977	0.362071	0.176224	2.05461	0.0399169	0.0911983	Isa	147	CADAFUAG00000863	AFUA_8G01680	Afu8G01680	Putative uncharacterized protein [Source:UniProtKB/TrEMBL
CADAFUAG00000864	173.03	-1.08276	0.242818	-4.45914	8.22876e-06	3.22356e-05	Itra	147	CADAFUAG00000864	AFUA_8G01870	Afu8G01870	Putative uncharacterized protein [Source:UniProtKB/TrEMBL
CADAFUAG00000864	173.03	-1.27	0.1961	-6.47626	9.40209e-11	8.68209e-10	Isa	147	CADAFUAG00000864	AFUA_8G01870	Afu8G01870	Putative uncharacterized protein [Source:UniProtKB/TrEMBL
CADAFUAG00000865	52.0702	0.995367	0.408668	2.43564	0.0148656	0.0316666	Itra	147	CADAFUAG00000865	AFUA_8G00920	Afu8G00920	UDP-glucose dehydrogenase Ugd1; putative [Source:UniProtKB/TrEMBL
CADAFUAG00000865	52.0702	-1.52893	0.321299	-4.75857	1.94968e-06	1.09201e-05	Isa	147	CADAFUAG00000865	AFUA_8G00920	Afu8G00920	UDP-glucose dehydrogenase Ugd1; putative [Source:UniProtKB/TrEMBL
CADAFUAG00000866	1656.71	3.91934	0.143475	27.3173	2.64645e-164	1.18977e-161	Itra	147	CADAFUAG00000866	AFUA_8G02090	Afu8G02090	Nucleotide-sugar transporter; putative [Source:UniProtKB/TrEMBL
CADAFUAG00000866	1656.71	2.00646	0.128299	15.6389	3.95242e-55	3.93852e-53	Isa	147	CADAFUAG00000866	AFUA_8G02090	Afu8G02090	Nucleotide-sugar transporter; putative [Source:UniProtKB/TrEMBL
CADAFUAG00000867	7.88605	-0.629061	0.979477	-0.642242	0.520716	0.627444	Itra	147	CADAFUAG00000867	AFUA_8G02420	Afu8G02420	Putative uncharacterized protein [Source:UniProtKB/TrEMBL
CADAFUAG00000867	7.88605	0.658526	0.871619	0.755521	0.449937	0.606335	Isa	147	CADAFUAG00000867	AFUA_8G02420	Afu8G02420	Putative uncharacterized protein [Source:UniProtKB/TrEMBL
CADAFUAG00000868	2.23184	-0.466397	1.73567	-0.268713	0.788151	0.849492	Itra	147	CADAFUAG00000868	AFUA_8G02250	Afu8G02250	Putative uncharacterized protein [Source:UniProtKB/TrEMBL
CADAFUAG00000868	2.23184	1.67823	1.57587	1.06495	0.286897	NA	Isa	147	CADAFUAG00000868	AFUA_8G02250	Afu8G02250	Putative uncharacterized protein [Source:UniProtKB/TrEMBL
CADAFUAG00000869	65.8744	1.06274	0.355608	2.98852	0.00280334	0.00711652	Itra	147	CADAFUAG00000869	AFUA_8G02140	Afu8G02140	Ankyrin repeat protein [Source:UniProtKB/TrEMBL
CADAFUAG00000869	65.8744	0.057116	0.295281	0.193429	0.846623	0.912212	Isa	147	CADAFUAG00000869	AFUA_8G02140	Afu8G02140	Ankyrin repeat protein [Source:UniProtKB/TrEMBL
CADAFUAG00000870	48.9297	0.901762	0.421873	2.13752	0.032556	0.0634126	Itra	147	CADAFUAG00000870	AFUA_8G01570	Afu8G01570	ADP-ribosylglycohydrolase family protein [Source:UniProtKB/TrEMBL
CADAFUAG00000870	48.9297	1.43959	0.361028	3.98746	6.67831e-05	0.000293976	Isa	147	CADAFUAG00000870	AFUA_8G01570	Afu8G01570	ADP-ribosylglycohydrolase family protein [Source:UniProtKB/TrEMBL
CADAFUAG00000871	639.095	-1.98686	0.171101	-11.6122	3.57236e-31	7.63045e-30	Itra	147	CADAFUAG00000871	AFUA_8G01300	Afu8G01300	Putative uncharacterized protein [Source:UniProtKB/TrEMBL
CADAFUAG00000871	639.095	-0.675807	0.12464	-5.42208	5.89096e-08	3.95405e-07	Isa	147	CADAFUAG00000871	AFUA_8G01300	Afu8G01300	Putative uncharacterized protein [Source:UniProtKB/TrEMBL
CADAFUAG00000872	1648.47	0.106362	0.119156	0.892624	0.372059	0.487748	Itra	147	CADAFUAG00000872	AFUA_8G02780	Afu8G02780	Vacuolar protein sorting/targeting protein 10 [Source:UniProtKB/Swiss-Prot
CADAFUAG00000872	1648.47	-0.10295	0.112517	-0.914969	0.360208	0.517813	Isa	147	CADAFUAG00000872	AFUA_8G02780	Afu8G02780	Vacuolar protein sorting/targeting protein 10 [Source:UniProtKB/Swiss-Prot
CADAFUAG00000873	4.45146	5.91832	1.83214	3.23028	0.00123667	0.00339599	Itra	147	CADAFUAG00000873	AFUA_8G00510	Afu8G00510	Cytochrome P450 oxidoreductase OrdA-like; putative [Source:UniProtKB/TrEMBL
CADAFUAG00000873	4.45146	1.55158	1.29544	1.19773	0.231024	0.372762	Isa	147	CADAFUAG00000873	AFUA_8G00510	Afu8G00510	Cytochrome P450 oxidoreductase OrdA-like; putative [Source:UniProtKB/TrEMBL
CADAFUAG00000874	78.5924	-1.74575	0.440582	-3.96237	7.42085e-05	0.00025375	Itra	147	CADAFUAG00000874	AFUA_8G01770	Afu8G01770	Putative uncharacterized protein [Source:UniProtKB/TrEMBL
CADAFUAG00000874	78.5924	-1.78707	0.269578	-6.62914	3.37654e-11	3.25037e-10	Isa	147	CADAFUAG00000874	AFUA_8G01770	Afu8G01770	Putative uncharacterized protein [Source:UniProtKB/TrEMBL
CADAFUAG00000875	186.521	-0.449078	0.22331	-2.01101	0.0443249	0.0829477	Itra	147	CADAFUAG00000875	AFUA_8G01890	Afu8G01890	Na+/H+ exchanger family protein; putative [Source:UniProtKB/TrEMBL
CADAFUAG00000875	186.521	-0.04657	0.199467	-0.233473	0.815394	0.892133	Isa	147	CADAFUAG00000875	AFUA_8G01890	Afu8G01890	Na+/H+ exchanger family protein; putative [Source:UniProtKB/TrEMBL
CADAFUAG00000876	4.87158	-2.29327	1.89508	-1.21012	0.226233	0.327989	Itra	147	CADAFUAG00000876	AFUA_8G01490	Afu8G01490	Endoglucanase; putative [Source:UniProtKB/TrEMBL
CADAFUAG00000876	4.87158	2.78543	1.07754	2.58498	0.00973846	0.0269368	Isa	147	CADAFUAG00000876	AFUA_8G01490	Afu8G01490	Endoglucanase; putative [Source:UniProtKB/TrEMBL
CADAFUAG00000877	1.19812	2.10045	2.63223	0.797974	0.424885	0.540904	Itra	147	CADAFUAG00000877	AFUA_8G01180	Afu8G01180	MFS sugar transporter; putative [Source:UniProtKB/TrEMBL
CADAFUAG00000877	1.19812	0.980597	1.96688	0.498555	0.618093	NA	Isa	147	CADAFUAG00000877	AFUA_8G01180	Afu8G01180	MFS sugar transporter; putative [Source:UniProtKB/TrEMBL
CADAFUAG00000878	0.699881	-1.47775	2.89045	-0.511252	0.609175	0.706712	Itra	147	CADAFUAG00000878	AFUA_8G02360	Afu8G02360	TRI7-like toxin biosynthesis protein; putative [Source:UniProtKB/TrEMBL
CADAFUAG00000878	0.699881	1.09624	2.59407	0.422595	0.672591	NA	Isa	147	CADAFUAG00000878	AFUA_8G02360	Afu8G02360	TRI7-like toxin biosynthesis protein; putative [Source:UniProtKB/TrEMBL
CADAFUAG00000879	165.896	-0.185162	0.232375	-0.796827	0.425552	0.541533	Itra	147	CADAFUAG00000879	AFUA_8G02650	Afu8G02650	ABC multidrug transporter; putative [Source:UniProtKB/TrEMBL
CADAFUAG00000879	165.896	-0.124816	0.207844	-0.600524	0.548157	0.692393	Isa	147	CADAFUAG00000879	AFUA_8G02650	Afu8G02650	ABC multidrug transporter; putative [Source:UniProtKB/TrEMBL
CADAFUAG00000880	546.411	-3.64822	0.20141	-18.1133	2.50068e-73	1.95115e-71	Itra	147	CADAFUAG00000880	AFUA_8G01390	Afu8G01390	Glycosyl hydrolase; putative [Source:UniProtKB/TrEMBL
CADAFUAG00000880	546.411	-1.27419	0.131593	-9.68275	3.56996e-22	7.52846e-21	Isa	147	CADAFUAG00000880	AFUA_8G01390	Afu8G01390	Glycosyl hydrolase; putative [Source:UniProtKB/TrEMBL
CADAFUAG00000881	18.9562	-0.117651	0.618956	-0.190079	0.849247	0.895417	Itra	147	CADAFUAG00000881	AFUA_8G00300	Afu8G00300	Putative uncharacterized protein [Source:UniProtKB/TrEMBL
CADAFUAG00000881	18.9562	-0.775949	0.5338	-1.45363	0.146048	0.261525	Isa	147	CADAFUAG00000881	AFUA_8G00300	Afu8G00300	Putative uncharacterized protein [Source:UniProtKB/TrEMBL
CADAFUAG00000882	70.333	-0.129129	0.340443	-0.379295	0.704468	0.782457	Itra	147	CADAFUAG00000882	AFUA_8G00820	Afu8G00820	Rhamnogalacturonase; putative [Source:UniProtKB/TrEMBL
CADAFUAG00000882	70.333	0.82596	0.285028	2.89782	0.0037577	0.0116735	Isa	147	CADAFUAG00000882	AFUA_8G00820	Afu8G00820	Rhamnogalacturonase; putative [Source:UniProtKB/TrEMBL
CADAFUAG00000883	17.6174	1.11289	0.620913	1.79235	0.0730769	0.127362	Itra	147	CADAFUAG00000883	AFUA_8G01080	Afu8G01080	Putative uncharacterized protein [Source:UniProtKB/TrEMBL
CADAFUAG00000883	17.6174	0.610983	0.544239	1.12264	0.261592	0.4104	Isa	147	CADAFUAG00000883	AFUA_8G01080	Afu8G01080	Putative uncharacterized protein [Source:UniProtKB/TrEMBL
CADAFUAG00000884	7866.97	1.36946	0.106639	12.8421	9.52816e-38	2.67724e-36	Itra	147	CADAFUAG00000884	AFUA_8G02530	Afu8G02530	Extracellular lipase; putative [Source:UniProtKB/TrEMBL
CADAFUAG00000884	7866.97	-0.300258	0.105247	-2.85289	0.00433234	0.0132453	Isa	147	CADAFUAG00000884	AFUA_8G02530	Afu8G02530	Extracellular lipase; putative [Source:UniProtKB/TrEMBL
CADAFUAG00000885	31.4668	-0.611402	0.544847	-1.12215	0.261797	0.36965	Itra	147	CADAFUAG00000885	AFUA_8G01560	Afu8G01560	Aldo-keto reductase (YakC); putative [Source:UniProtKB/TrEMBL
CADAFUAG00000885	31.4668	0.705345	0.404498	1.74375	0.0812022	0.164877	Isa	147	CADAFUAG00000885	AFUA_8G01560	Afu8G01560	Aldo-keto reductase (YakC); putative [Source:UniProtKB/TrEMBL
CADAFUAG00000886	0	NA	NA	NA	NA	NA	Itra	147	CADAFUAG00000886	AFUA_8G01170	Afu8G01170	Putative uncharacterized protein [Source:UniProtKB/TrEMBL
CADAFUAG00000886	0	NA	NA	NA	NA	NA	Isa	147	CADAFUAG00000886	AFUA_8G01170	Afu8G01170	Putative uncharacterized protein [Source:UniProtKB/TrEMBL
CADAFUAG00000887	579.745	-0.338819	0.151418	-2.23763	0.0252449	0.0507533	Itra	147	CADAFUAG00000887	AFUA_8G02840	Afu8G02840	Dynamin-like GTPase Dnm1; putative [Source:UniProtKB/TrEMBL
CADAFUAG00000887	579.745	-0.0970744	0.137138	-0.707859	0.479033	0.632848	Isa	147	CADAFUAG00000887	AFUA_8G02840	Afu8G02840	Dynamin-like GTPase Dnm1; putative [Source:UniProtKB/TrEMBL
CADAFUAG00000888	19.4553	1.52412	0.661954	2.30246	0.0213092	0.0435926	Itra	147	CADAFUAG00000888	AFUA_8G00240	Afu8G00240	Cytochrome P450 monooxygenase; putative [Source:UniProtKB/TrEMBL
CADAFUAG00000888	19.4553	0.826571	0.489384	1.689	0.0912191	0.18033	Isa	147	CADAFUAG00000888	AFUA_8G00240	Afu8G00240	Cytochrome P450 monooxygenase; putative [Source:UniProtKB/TrEMBL
CADAFUAG00000889	100.95	-0.546738	0.283465	-1.92876	0.0537601	0.0980961	Itra	147	CADAFUAG00000889	AFUA_8G02700	Afu8G02700	Repressor protein [Source:UniProtKB/TrEMBL
CADAFUAG00000889	100.95	0.0863313	0.231355	0.373154	0.709034	0.819151	Isa	147	CADAFUAG00000889	AFUA_8G02700	Afu8G02700	Repressor protein [Source:UniProtKB/TrEMBL
CADAFUAG00000890	1472.15	1.47288	0.125813	11.7069	1.17513e-31	2.57411e-30	Itra	147	CADAFUAG00000890	AFUA_8G02450	Afu8G02450	Putative uncharacterized protein [Source:UniProtKB/TrEMBL
CADAFUAG00000890	1472.15	-0.0190111	0.120198	-0.158164	0.874327	0.928928	Isa	147	CADAFUAG00000890	AFUA_8G02450	Afu8G02450	Putative uncharacterized protein [Source:UniProtKB/TrEMBL
CADAFUAG00000891	591.439	-1.48195	0.161205	-9.19295	3.82218e-20	5.05395e-19	Itra	147	CADAFUAG00000891	AFUA_8G00610	Afu8G00610	Cell surface protein Mas1; putative [Source:UniProtKB/TrEMBL
CADAFUAG00000891	591.439	0.912439	0.132058	6.90937	4.86799e-12	5.05647e-11	Isa	147	CADAFUAG00000891	AFUA_8G00610	Afu8G00610	Cell surface protein Mas1; putative [Source:UniProtKB/TrEMBL
CADAFUAG00000892	123.398	4.61903	0.406409	11.3655	6.21311e-30	1.26691e-28	Itra	147	CADAFUAG00000892	AFUA_8G02040	Afu8G02040	Glycosyl transferase; putative [Source:UniProtKB/TrEMBL
CADAFUAG00000892	123.398	1.64297	0.236148	6.95736	3.46713e-12	3.63468e-11	Isa	147	CADAFUAG00000892	AFUA_8G02040	Afu8G02040	Glycosyl transferase; putative [Source:UniProtKB/TrEMBL
CADAFUAG00000893	55.1458	-0.461318	0.411121	-1.1221	0.261821	0.36965	Itra	147	CADAFUAG00000893	AFUA_8G02620	Afu8G02620	CobW domain protein [Source:UniProtKB/TrEMBL
CADAFUAG00000893	55.1458	-0.521351	0.343976	-1.51566	0.129605	0.238781	Isa	147	CADAFUAG00000893	AFUA_8G02620	Afu8G02620	CobW domain protein [Source:UniProtKB/TrEMBL
CADAFUAG00000894	1.47763	0.427657	2.10175	0.203477	0.838763	0.888183	Itra	147	CADAFUAG00000894	AFUA_8G02390	Afu8G02390	Putative uncharacterized protein [Source:UniProtKB/TrEMBL
CADAFUAG00000894	1.47763	-0.418247	1.92597	-0.217162	0.828082	NA	Isa	147	CADAFUAG00000894	AFUA_8G02390	Afu8G02390	Putative uncharacterized protein [Source:UniProtKB/TrEMBL
CADAFUAG00000895	77.1519	-0.27142	0.35967	-0.754635	0.450468	0.565391	Itra	147	CADAFUAG00000895	AFUA_8G01830	Afu8G01830	Putative uncharacterized protein [Source:UniProtKB/TrEMBL
CADAFUAG00000895	77.1519	0.650343	0.294159	2.21085	0.0270459	0.0653309	Isa	147	CADAFUAG00000895	AFUA_8G01830	Afu8G01830	Putative uncharacterized protein [Source:UniProtKB/TrEMBL
CADAFUAG00000896	233.897	0.796981	0.267405	2.98042	0.00287849	0.00728966	Itra	147	CADAFUAG00000896	AFUA_8G01670	Afu8G01670	Catalase-peroxidase [Source:UniProtKB/Swiss-Prot
CADAFUAG00000896	233.897	0.799285	0.245287	3.25858	0.00111973	0.00393403	Isa	147	CADAFUAG00000896	AFUA_8G01670	Afu8G01670	Catalase-peroxidase [Source:UniProtKB/Swiss-Prot
CADAFUAG00000897	817.287	0.697791	0.152823	4.56601	4.97088e-06	1.99279e-05	Itra	147	CADAFUAG00000897	AFUA_8G02480	Afu8G02480	Putative uncharacterized protein [Source:UniProtKB/TrEMBL
CADAFUAG00000897	817.287	0.0735623	0.139391	0.527739	0.59768	0.734491	Isa	147	CADAFUAG00000897	AFUA_8G02480	Afu8G02480	Putative uncharacterized protein [Source:UniProtKB/TrEMBL
CADAFUAG00000898	13.6632	-1.72947	0.847338	-2.04106	0.0412447	0.078097	Itra	147	CADAFUAG00000898	AFUA_8G01780	Afu8G01780	Nitrilase; putative [Source:UniProtKB/TrEMBL
CADAFUAG00000898	13.6632	-1.16404	0.622648	-1.86949	0.0615543	0.130781	Isa	147	CADAFUAG00000898	AFUA_8G01780	Afu8G01780	Nitrilase; putative [Source:UniProtKB/TrEMBL
CADAFUAG00000899	1.55964	0.508979	2.1741	0.23411	0.8149	0.869613	Itra	147	CADAFUAG00000899	AFUA_8G00880	Afu8G00880	Putative uncharacterized protein [Source:UniProtKB/TrEMBL
CADAFUAG00000899	1.55964	1.39614	1.75986	0.793326	0.427588	NA	Isa	147	CADAFUAG00000899	AFUA_8G00880	Afu8G00880	Putative uncharacterized protein [Source:UniProtKB/TrEMBL
CADAFUAG00000900	549.959	0.640436	0.162043	3.95226	7.74178e-05	0.000263768	Itra	147	CADAFUAG00000900	AFUA_8G00590	Afu8G00590	Fatty acid desaturase; putative [Source:UniProtKB/TrEMBL
CADAFUAG00000900	549.959	-0.236911	0.143431	-1.65174	0.0985871	0.192173	Isa	147	CADAFUAG00000900	AFUA_8G00590	Afu8G00590	Fatty acid desaturase; putative [Source:UniProtKB/TrEMBL
CADAFUAG00000901	1.56801	-2.35939	2.31827	-1.01774	0.308802	0.42191	Itra	147	CADAFUAG00000901	AFUA_8G01190	Afu8G01190	Isoamyl alcohol oxidase; putative [Source:UniProtKB/TrEMBL
CADAFUAG00000901	1.56801	1.45786	1.84777	0.788988	0.430119	NA	Isa	147	CADAFUAG00000901	AFUA_8G01190	Afu8G01190	Isoamyl alcohol oxidase; putative [Source:UniProtKB/TrEMBL
CADAFUAG00000902	14.3776	0.453564	0.67814	0.668835	0.503601	0.612851	Itra	147	CADAFUAG00000902	AFUA_8G00760	Afu8G00760	Cytochrome P450; putative [Source:UniProtKB/TrEMBL
CADAFUAG00000902	14.3776	0.379662	0.60279	0.62984	0.528799	0.675944	Isa	147	CADAFUAG00000902	AFUA_8G00760	Afu8G00760	Cytochrome P450; putative [Source:UniProtKB/TrEMBL
CADAFUAG00000903	47.1591	1.22209	0.406175	3.00878	0.00262303	0.00671658	Itra	147	CADAFUAG00000903	AFUA_8G02170	Afu8G02170	C6 finger domain protein; putative [Source:UniProtKB/TrEMBL
CADAFUAG00000903	47.1591	1.9025	0.33876	5.61606	1.95359e-08	1.39382e-07	Isa	147	CADAFUAG00000903	AFUA_8G02170	Afu8G02170	C6 finger domain protein; putative [Source:UniProtKB/TrEMBL
CADAFUAG00000904	0	NA	NA	NA	NA	NA	Itra	147	CADAFUAG00000904	AFUA_8G02220	Afu8G02220	Putative uncharacterized protein [Source:UniProtKB/TrEMBL
CADAFUAG00000904	0	NA	NA	NA	NA	NA	Isa	147	CADAFUAG00000904	AFUA_8G02220	Afu8G02220	Putative uncharacterized protein [Source:UniProtKB/TrEMBL
CADAFUAG00000905	9.06148	0.745027	0.852915	0.873507	0.382387	0.497878	Itra	147	CADAFUAG00000905	AFUA_8G00740	Afu8G00740	Cytochrome P450; putative [Source:UniProtKB/TrEMBL
CADAFUAG00000905	9.06148	-0.141901	0.781282	-0.181625	0.855877	0.917262	Isa	147	CADAFUAG00000905	AFUA_8G00740	Afu8G00740	Cytochrome P450; putative [Source:UniProtKB/TrEMBL
CADAFUAG00000906	38.141	1.30166	0.450447	2.88971	0.00385595	0.00953235	Itra	147	CADAFUAG00000906	AFUA_8G00910	Afu8G00910	Putative uncharacterized protein [Source:UniProtKB/TrEMBL
CADAFUAG00000906	38.141	-1.01645	0.415637	-2.44553	0.0144638	0.0379379	Isa	147	CADAFUAG00000906	AFUA_8G00910	Afu8G00910	Putative uncharacterized protein [Source:UniProtKB/TrEMBL
CADAFUAG00000907	0	NA	NA	NA	NA	NA	Itra	147	CADAFUAG00000907	AFUA_8G02080	Afu8G02080	Putative uncharacterized protein [Source:UniProtKB/TrEMBL
CADAFUAG00000907	0	NA	NA	NA	NA	NA	Isa	147	CADAFUAG00000907	AFUA_8G02080	Afu8G02080	Putative uncharacterized protein [Source:UniProtKB/TrEMBL
CADAFUAG00000908	11.4692	-1.28848	0.862069	-1.49464	0.13501	0.214854	Itra	147	CADAFUAG00000908	AFUA_8G01150	Afu8G01150	C6 transcription factor; putative [Source:UniProtKB/TrEMBL
CADAFUAG00000908	11.4692	-0.167294	0.648262	-0.258065	0.796356	0.878954	Isa	147	CADAFUAG00000908	AFUA_8G01150	Afu8G01150	C6 transcription factor; putative [Source:UniProtKB/TrEMBL
CADAFUAG00000909	187.412	0.807779	0.217598	3.71225	0.000205425	0.000650157	Itra	147	CADAFUAG00000909	AFUA_8G02130	Afu8G02130	1;3-beta-glucanosyltransferase; putative [Source:UniProtKB/TrEMBL
CADAFUAG00000909	187.412	0.579328	0.182463	3.17504	0.00149816	0.00511688	Isa	147	CADAFUAG00000909	AFUA_8G02130	Afu8G02130	1;3-beta-glucanosyltransferase; putative [Source:UniProtKB/TrEMBL
CADAFUAG00000910	24.9462	-0.183058	0.525845	-0.348121	0.727749	0.801731	Itra	147	CADAFUAG00000910	AFUA_8G00350	Afu8G00350	Putative uncharacterized protein [Source:UniProtKB/TrEMBL
CADAFUAG00000910	24.9462	-0.0760713	0.447126	-0.170134	0.864905	0.922158	Isa	147	CADAFUAG00000910	AFUA_8G00350	Afu8G00350	Putative uncharacterized protein [Source:UniProtKB/TrEMBL
CADAFUAG00000911	245.291	-0.116689	0.19867	-0.587351	0.556968	0.659931	Itra	147	CADAFUAG00000911	AFUA_8G02660	Afu8G02660	Chromate ion transporter; putative [Source:UniProtKB/TrEMBL
CADAFUAG00000911	245.291	-0.444084	0.181806	-2.44263	0.0145809	0.0382027	Isa	147	CADAFUAG00000911	AFUA_8G02660	Afu8G02660	Chromate ion transporter; putative [Source:UniProtKB/TrEMBL
CADAFUAG00000912	162.394	1.02523	0.222661	4.60447	4.13523e-06	1.68352e-05	Itra	147	CADAFUAG00000912	AFUA_8G01940	Afu8G01940	C6 finger domain protein; putative [Source:UniProtKB/TrEMBL
CADAFUAG00000912	162.394	0.444605	0.201283	2.20886	0.0271844	0.0656306	Isa	147	CADAFUAG00000912	AFUA_8G01940	Afu8G01940	C6 finger domain protein; putative [Source:UniProtKB/TrEMBL
CADAFUAG00000913	295.029	0.418086	0.201014	2.07988	0.0375362	0.0718968	Itra	147	CADAFUAG00000913	AFUA_8G00980	Afu8G00980	Putative uncharacterized protein [Source:UniProtKB/TrEMBL
CADAFUAG00000913	295.029	-0.252852	0.171647	-1.47309	0.140726	0.254204	Isa	147	CADAFUAG00000913	AFUA_8G00980	Afu8G00980	Putative uncharacterized protein [Source:UniProtKB/TrEMBL
CADAFUAG00000914	59.1185	-1.03742	0.397019	-2.61303	0.00897432	0.0201922	Itra	147	CADAFUAG00000914	AFUA_8G01420	Afu8G01420	Quinone oxidoreductase; putative [Source:UniProtKB/TrEMBL
CADAFUAG00000914	59.1185	-0.84104	0.300587	-2.79799	0.0051422	0.0153994	Isa	147	CADAFUAG00000914	AFUA_8G01420	Afu8G01420	Quinone oxidoreductase; putative [Source:UniProtKB/TrEMBL
CADAFUAG00000915	263.341	-2.91311	0.531164	-5.48438	4.14925e-08	2.16306e-07	Itra	147	CADAFUAG00000915	AFUA_8G01850	Afu8G01850	Phosphate-repressible phosphate permease; putative [Source:UniProtKB/TrEMBL
CADAFUAG00000915	263.341	-1.00539	0.498638	-2.01627	0.0437717	0.0984037	Isa	147	CADAFUAG00000915	AFUA_8G01850	Afu8G01850	Phosphate-repressible phosphate permease; putative [Source:UniProtKB/TrEMBL
CADAFUAG00000916	176.942	-1.77162	0.231722	-7.64544	2.08234e-14	1.86699e-13	Itra	147	CADAFUAG00000916	AFUA_8G01750	Afu8G01750	Acyl-CoA oxidase; putative [Source:UniProtKB/TrEMBL
CADAFUAG00000916	176.942	-0.835246	0.213279	-3.91621	8.99519e-05	0.000386214	Isa	147	CADAFUAG00000916	AFUA_8G01750	Afu8G01750	Acyl-CoA oxidase; putative [Source:UniProtKB/TrEMBL
CADAFUAG00000917	5.96946	-0.200384	1.01406	-0.197606	0.843354	0.891014	Itra	147	CADAFUAG00000917	AFUA_8G00640	Afu8G00640	Glycosyl transferase; putative [Source:UniProtKB/TrEMBL
CADAFUAG00000917	5.96946	-3.52506	1.32398	-2.66247	0.00775685	0.0220292	Isa	147	CADAFUAG00000917	AFUA_8G00640	Afu8G00640	Glycosyl transferase; putative [Source:UniProtKB/TrEMBL
CADAFUAG00000918	146.135	0.123684	0.221753	0.557756	0.577011	0.67857	Itra	147	CADAFUAG00000918	AFUA_8G02830	Afu8G02830	UPD-GlcNAc transporter (Mnn2-2); putative [Source:UniProtKB/TrEMBL
CADAFUAG00000918	146.135	-0.130957	0.207312	-0.631692	0.527588	0.675444	Isa	147	CADAFUAG00000918	AFUA_8G02830	Afu8G02830	UPD-GlcNAc transporter (Mnn2-2); putative [Source:UniProtKB/TrEMBL
CADAFUAG00000919	21.9161	-1.43606	0.623728	-2.30238	0.0213138	0.0435926	Itra	147	CADAFUAG00000919	AFUA_8G00290	Afu8G00290	Putative uncharacterized protein [Source:UniProtKB/TrEMBL
CADAFUAG00000919	21.9161	-0.416578	0.472618	-0.881427	0.378087	0.537381	Isa	147	CADAFUAG00000919	AFUA_8G00290	Afu8G00290	Putative uncharacterized protein [Source:UniProtKB/TrEMBL
CADAFUAG00000920	15.9125	-2.12717	0.743568	-2.86075	0.00422634	0.0103612	Itra	147	CADAFUAG00000920	AFUA_8G01600	Afu8G01600	Putative uncharacterized protein [Source:UniProtKB/TrEMBL
CADAFUAG00000920	15.9125	-1.10735	0.619898	-1.78634	0.0740444	0.152668	Isa	147	CADAFUAG00000920	AFUA_8G01600	Afu8G01600	Putative uncharacterized protein [Source:UniProtKB/TrEMBL
CADAFUAG00000921	24.7901	0.3488	0.576482	0.605049	0.545147	0.649757	Itra	147	CADAFUAG00000921	AFUA_8G01120	Afu8G01120	Putative uncharacterized protein [Source:UniProtKB/TrEMBL
CADAFUAG00000921	24.7901	-0.0533478	0.444741	-0.119953	0.904521	0.944409	Isa	147	CADAFUAG00000921	AFUA_8G01120	Afu8G01120	Putative uncharacterized protein [Source:UniProtKB/TrEMBL
CADAFUAG00000922	53044.7	1.67949	0.0888126	18.9105	9.34279e-80	8.24348e-78	Itra	147	CADAFUAG00000922	AFUA_8G02440	Afu8G02440	C-4 methyl sterol oxidase; putative [Source:UniProtKB/TrEMBL
CADAFUAG00000922	53044.7	0.401714	0.0885155	4.53834	5.66981e-06	2.98744e-05	Isa	147	CADAFUAG00000922	AFUA_8G02440	Afu8G02440	C-4 methyl sterol oxidase; putative [Source:UniProtKB/TrEMBL
CADAFUAG00000923	11.4849	1.34348	0.803224	1.67261	0.0944035	0.158701	Itra	147	CADAFUAG00000923	AFUA_8G01350	Afu8G01350	Putative uncharacterized protein [Source:UniProtKB/TrEMBL
CADAFUAG00000923	11.4849	-0.980251	0.675632	-1.45086	0.146818	0.262385	Isa	147	CADAFUAG00000923	AFUA_8G01350	Afu8G01350	Putative uncharacterized protein [Source:UniProtKB/TrEMBL
CADAFUAG00000924	11.1622	1.42055	0.764037	1.85927	0.062989	0.112331	Itra	147	CADAFUAG00000924	AFUA_8G00530	Afu8G00530	Alpha/beta hydrolase; putative [Source:UniProtKB/TrEMBL
CADAFUAG00000924	11.1622	-1.95555	0.759114	-2.57609	0.00999241	0.0275204	Isa	147	CADAFUAG00000924	AFUA_8G00530	Afu8G00530	Alpha/beta hydrolase; putative [Source:UniProtKB/TrEMBL
CADAFUAG00000925	7.05188	-5.41685	1.66191	-3.25942	0.00111641	0.00310639	Itra	147	CADAFUAG00000925	AFUA_8G01795	Afu8G01795	Putative uncharacterized protein [Source:UniProtKB/TrEMBL
CADAFUAG00000925	7.05188	-2.82601	1.07874	-2.61974	0.0087997	0.0246511	Isa	147	CADAFUAG00000925	AFUA_8G01795	Afu8G01795	Putative uncharacterized protein [Source:UniProtKB/TrEMBL
CADAFUAG00000926	288.819	-0.708561	0.193615	-3.65963	0.000252575	0.000784911	Itra	147	CADAFUAG00000926	AFUA_8G02760	Afu8G02760	Mitochondrial ornithine carrier protein AmcA/Ort1; putative [Source:UniProtKB/TrEMBL
CADAFUAG00000926	288.819	-0.723014	0.165174	-4.37729	1.20165e-05	6.02687e-05	Isa	147	CADAFUAG00000926	AFUA_8G02760	Afu8G02760	Mitochondrial ornithine carrier protein AmcA/Ort1; putative [Source:UniProtKB/TrEMBL
CADAFUAG00000927	19.4342	3.37805	0.818656	4.12634	3.68585e-05	0.000131413	Itra	147	CADAFUAG00000927	AFUA_8G00250	Afu8G00250	Dimethylallyl tryptophan synthase; putative [Source:UniProtKB/TrEMBL
CADAFUAG00000927	19.4342	0.944155	0.499927	1.88858	0.0589475	0.126021	Isa	147	CADAFUAG00000927	AFUA_8G00250	Afu8G00250	Dimethylallyl tryptophan synthase; putative [Source:UniProtKB/TrEMBL
CADAFUAG00000928	38.0866	0.880197	0.430938	2.04251	0.0411006	0.0778553	Itra	147	CADAFUAG00000928	AFUA_8G01480	Afu8G01480	Potassium channel; putative [Source:UniProtKB/TrEMBL
CADAFUAG00000928	38.0866	-1.74742	0.389163	-4.49021	7.11516e-06	3.68056e-05	Isa	147	CADAFUAG00000928	AFUA_8G01480	Afu8G01480	Potassium channel; putative [Source:UniProtKB/TrEMBL
CADAFUAG00000929	2.26887	1.35777	1.88688	0.719581	0.471783	0.585219	Itra	147	CADAFUAG00000929	AFUA_8G01450	Afu8G01450	GABA permease; putative [Source:UniProtKB/TrEMBL
CADAFUAG00000929	2.26887	-0.189993	1.49018	-0.127497	0.898547	NA	Isa	147	CADAFUAG00000929	AFUA_8G01450	Afu8G01450	GABA permease; putative [Source:UniProtKB/TrEMBL
CADAFUAG00000930	760.679	-0.795751	0.13994	-5.68637	1.29772e-08	7.06968e-08	Itra	147	CADAFUAG00000930	AFUA_8G02860	Afu8G02860	AMP deaminase Amd1; putative [Source:UniProtKB/TrEMBL
CADAFUAG00000930	760.679	-1.12109	0.122667	-9.13931	6.28531e-20	1.17759e-18	Isa	147	CADAFUAG00000930	AFUA_8G02860	Afu8G02860	AMP deaminase Amd1; putative [Source:UniProtKB/TrEMBL
CADAFUAG00000931	4.14944	-1.22137	1.32433	-0.922253	0.356397	0.472443	Itra	147	CADAFUAG00000931	AFUA_8G00220	Afu8G00220	Cytochrome P450; putative [Source:UniProtKB/TrEMBL
CADAFUAG00000931	4.14944	-0.874347	1.32708	-0.658848	0.509993	0.659879	Isa	147	CADAFUAG00000931	AFUA_8G00220	Afu8G00220	Cytochrome P450; putative [Source:UniProtKB/TrEMBL
CADAFUAG00000932	6.81654	1.82381	0.967814	1.88446	0.0595027	0.106921	Itra	147	CADAFUAG00000932	AFUA_8G01510	Afu8G01510	Putative uncharacterized protein [Source:UniProtKB/TrEMBL
CADAFUAG00000932	6.81654	-0.311439	1.50603	-0.206794	0.836171	0.905304	Isa	147	CADAFUAG00000932	AFUA_8G01510	Afu8G01510	Putative uncharacterized protein [Source:UniProtKB/TrEMBL
CADAFUAG00000933	2.77576	3.43694	2.03915	1.68548	0.0918964	0.155038	Itra	147	CADAFUAG00000933	AFUA_8G02320	Afu8G02320	Capsule polysaccharide synthase Cps1; putative [Source:UniProtKB/TrEMBL
CADAFUAG00000933	2.77576	1.00996	1.71173	0.590023	0.555175	NA	Isa	147	CADAFUAG00000933	AFUA_8G02320	Afu8G02320	Capsule polysaccharide synthase Cps1; putative [Source:UniProtKB/TrEMBL
CADAFUAG00000934	122.28	1.2852	0.283089	4.53991	5.62785e-06	2.23716e-05	Itra	147	CADAFUAG00000934	AFUA_8G02570	Afu8G02570	Flavin-binding monooxygenase; putative [Source:UniProtKB/TrEMBL
CADAFUAG00000934	122.28	1.77561	0.228037	7.78647	6.89072e-15	9.06894e-14	Isa	147	CADAFUAG00000934	AFUA_8G02570	Afu8G02570	Flavin-binding monooxygenase; putative [Source:UniProtKB/TrEMBL
CADAFUAG00000935	166.162	1.87276	0.222981	8.39877	4.51165e-17	4.89592e-16	Itra	147	CADAFUAG00000935	AFUA_8G01900	Afu8G01900	Putative uncharacterized protein [Source:UniProtKB/TrEMBL
CADAFUAG00000935	166.162	1.04477	0.205614	5.08121	3.75043e-07	2.28265e-06	Isa	147	CADAFUAG00000935	AFUA_8G01900	Afu8G01900	Putative uncharacterized protein [Source:UniProtKB/TrEMBL
CADAFUAG00000936	0.971885	2.09616	2.76527	0.758031	0.448432	0.563775	Itra	147	CADAFUAG00000936	AFUA_8G02270	Afu8G02270	Dihydrodipicolinate synthetase family protein [Source:UniProtKB/TrEMBL
CADAFUAG00000936	0.971885	-0.587337	2.17575	-0.269947	0.787201	NA	Isa	147	CADAFUAG00000936	AFUA_8G02270	Afu8G02270	Dihydrodipicolinate synthetase family protein [Source:UniProtKB/TrEMBL
CADAFUAG00000937	7.78681	1.25439	1.50604	0.832905	0.404898	0.52108	Itra	147	CADAFUAG00000937	AFUA_8G01520	Afu8G01520	Pectin methylesterase; putative [Source:UniProtKB/TrEMBL
CADAFUAG00000937	7.78681	1.44879	0.765641	1.89226	0.0584559	0.125214	Isa	147	CADAFUAG00000937	AFUA_8G01520	Afu8G01520	Pectin methylesterase; putative [Source:UniProtKB/TrEMBL
CADAFUAG00000938	28.3944	-0.373907	0.484807	-0.771249	0.440559	0.555985	Itra	147	CADAFUAG00000938	AFUA_8G01110	Afu8G01110	Integral membrane protein; putative [Source:UniProtKB/TrEMBL
CADAFUAG00000938	28.3944	0.464876	0.43116	1.0782	0.280944	0.433045	Isa	147	CADAFUAG00000938	AFUA_8G01110	Afu8G01110	Integral membrane protein; putative [Source:UniProtKB/TrEMBL
CADAFUAG00000939	128.592	1.05699	0.286752	3.68607	0.000227745	0.000714571	Itra	147	CADAFUAG00000939	AFUA_8G01970	Afu8G01970	Probable endopolygalacturonase B [Source:UniProtKB/Swiss-Prot
CADAFUAG00000939	128.592	0.759069	0.209151	3.62928	0.000284208	0.00112052	Isa	147	CADAFUAG00000939	AFUA_8G01970	Afu8G01970	Probable endopolygalacturonase B [Source:UniProtKB/Swiss-Prot
CADAFUAG00000940	331.815	-0.398498	0.1749	-2.27843	0.0227007	0.0461393	Itra	147	CADAFUAG00000940	AFUA_8G02730	Afu8G02730	Translation machinery-associated protein 22 [Source:UniProtKB/Swiss-Prot
CADAFUAG00000940	331.815	-0.0231381	0.163718	-0.141329	0.88761	0.936031	Isa	147	CADAFUAG00000940	AFUA_8G02730	Afu8G02730	Translation machinery-associated protein 22 [Source:UniProtKB/Swiss-Prot
CADAFUAG00000941	424.205	1.46639	0.185095	7.92234	2.33077e-15	2.2431e-14	Itra	147	CADAFUAG00000941	AFUA_8G02100	Afu8G02100	Beta-glucosidase; putative [Source:UniProtKB/TrEMBL
CADAFUAG00000941	424.205	3.10977	0.160836	19.3351	2.72388e-83	7.05718e-81	Isa	147	CADAFUAG00000941	AFUA_8G02100	Afu8G02100	Beta-glucosidase; putative [Source:UniProtKB/TrEMBL
CADAFUAG00000942	5.92919	0.384384	1.11052	0.346131	0.729244	0.802914	Itra	147	CADAFUAG00000942	AFUA_8G00400	Afu8G00400	Putative uncharacterized protein [Source:UniProtKB/TrEMBL
CADAFUAG00000942	5.92919	0.851381	0.934685	0.910874	0.362362	0.520167	Isa	147	CADAFUAG00000942	AFUA_8G00400	Afu8G00400	Putative uncharacterized protein [Source:UniProtKB/TrEMBL
CADAFUAG00000943	0.56126	2.72466	3.67744	0.740912	0.458747	0.573039	Itra	147	CADAFUAG00000943	AFUA_8G01620	Afu8G01620	Putative uncharacterized protein [Source:UniProtKB/TrEMBL
CADAFUAG00000943	0.56126	3.35418	3.57499	0.938233	0.348125	NA	Isa	147	CADAFUAG00000943	AFUA_8G01620	Afu8G01620	Putative uncharacterized protein [Source:UniProtKB/TrEMBL
CADAFUAG00000944	97.7448	0.0265884	0.289302	0.0919054	0.926773	0.950018	Itra	147	CADAFUAG00000944	AFUA_8G00850	Afu8G00850	Dihydroorotase; homodimeric type [Source:UniProtKB/TrEMBL
CADAFUAG00000944	97.7448	-0.308223	0.247826	-1.24371	0.213607	0.350604	Isa	147	CADAFUAG00000944	AFUA_8G00850	Afu8G00850	Dihydroorotase; homodimeric type [Source:UniProtKB/TrEMBL
CADAFUAG00000945	678.229	2.0882	0.136187	15.3334	4.57455e-53	2.08639e-51	Itra	147	CADAFUAG00000945	AFUA_8G02520	Afu8G02520	Arylsulfatase; putative [Source:UniProtKB/TrEMBL
CADAFUAG00000945	678.229	0.548749	0.122771	4.46969	7.83332e-06	4.03365e-05	Isa	147	CADAFUAG00000945	AFUA_8G02520	Afu8G02520	Arylsulfatase; putative [Source:UniProtKB/TrEMBL
CADAFUAG00000946	1.95544	2.22735	2.10801	1.05661	0.290689	0.402817	Itra	147	CADAFUAG00000946	AFUA_8G02410	Afu8G02410	UbiA prenyltransferase family protein [Source:UniProtKB/TrEMBL
CADAFUAG00000946	1.95544	0.0433266	1.54981	0.027956	0.977697	NA	Isa	147	CADAFUAG00000946	AFUA_8G02410	Afu8G02410	UbiA prenyltransferase family protein [Source:UniProtKB/TrEMBL
CADAFUAG00000947	9.41608	1.16238	1.03152	1.12687	0.259799	0.36764	Itra	147	CADAFUAG00000947	AFUA_8G01530	Afu8G01530	HHE domain protein [Source:UniProtKB/TrEMBL
CADAFUAG00000947	9.41608	1.0892	0.733097	1.48575	0.137345	0.249384	Isa	147	CADAFUAG00000947	AFUA_8G01530	Afu8G01530	HHE domain protein [Source:UniProtKB/TrEMBL
CADAFUAG00000948	3.26561	-2.91252	1.67016	-1.74386	0.0811831	0.139481	Itra	147	CADAFUAG00000948	AFUA_8G01650	Afu8G01650	Putative uncharacterized protein [Source:UniProtKB/TrEMBL
CADAFUAG00000948	3.26561	-2.06114	1.37175	-1.50256	0.132952	0.243422	Isa	147	CADAFUAG00000948	AFUA_8G01650	Afu8G01650	Putative uncharacterized protein [Source:UniProtKB/TrEMBL
CADAFUAG00000949	5.61457	3.14842	1.41073	2.23177	0.0256299	0.0514069	Itra	147	CADAFUAG00000949	AFUA_8G00500	Afu8G00500	Acetate-CoA ligase; putative [Source:UniProtKB/TrEMBL
CADAFUAG00000949	5.61457	1.74708	1.01803	1.71615	0.0861351	0.17254	Isa	147	CADAFUAG00000949	AFUA_8G00500	Afu8G00500	Acetate-CoA ligase; putative [Source:UniProtKB/TrEMBL
CADAFUAG00000950	447.135	-1.15753	0.171835	-6.73626	1.62515e-11	1.17033e-10	Itra	147	CADAFUAG00000950	AFUA_8G00940	Afu8G00940	MFS multidrug transporter; putative [Source:UniProtKB/TrEMBL
CADAFUAG00000950	447.135	0.0946178	0.145416	0.650671	0.515259	0.664538	Isa	147	CADAFUAG00000950	AFUA_8G00940	Afu8G00940	MFS multidrug transporter; putative [Source:UniProtKB/TrEMBL
CADAFUAG00000951	0.495666	0.69146	3.39047	0.203942	0.838398	NA	Itra	147	CADAFUAG00000951	AFUA_8G02400	Afu8G02400	Geranylgeranyl pyrophosphate synthetase AtmG; putative [Source:UniProtKB/TrEMBL
CADAFUAG00000951	0.495666	-2.80207	3.26207	-0.858983	0.39035	NA	Isa	147	CADAFUAG00000951	AFUA_8G02400	Afu8G02400	Geranylgeranyl pyrophosphate synthetase AtmG; putative [Source:UniProtKB/TrEMBL
CADAFUAG00000952	392.219	-0.46235	0.165783	-2.78889	0.00528889	0.0126603	Itra	147	CADAFUAG00000952	AFUA_8G02740	Afu8G02740	Putative uncharacterized protein [Source:UniProtKB/TrEMBL
CADAFUAG00000952	392.219	-0.749186	0.150491	-4.97826	6.41581e-07	3.79013e-06	Isa	147	CADAFUAG00000952	AFUA_8G02740	Afu8G02740	Putative uncharacterized protein [Source:UniProtKB/TrEMBL
CADAFUAG00000953	2.57055	-1.44461	1.72373	-0.838069	0.401992	0.518188	Itra	147	CADAFUAG00000953	AFUA_8G00160	Afu8G00160	Putative uncharacterized protein [Source:UniProtKB/TrEMBL
CADAFUAG00000953	2.57055	1.50324	1.48891	1.00962	0.312677	NA	Isa	147	CADAFUAG00000953	AFUA_8G00160	Afu8G00160	Putative uncharacterized protein [Source:UniProtKB/TrEMBL
CADAFUAG00000954	0.963175	1.9371	2.64917	0.731209	0.464651	0.578419	Itra	147	CADAFUAG00000954	AFUA_8G01610	Afu8G01610	Putative uncharacterized protein [Source:UniProtKB/TrEMBL
CADAFUAG00000954	0.963175	0.318693	2.80115	0.113772	0.909418	NA	Isa	147	CADAFUAG00000954	AFUA_8G01610	Afu8G01610	Putative uncharacterized protein [Source:UniProtKB/TrEMBL
CADAFUAG00000955	5.67071	2.07169	1.14512	1.80914	0.0704288	0.123293	Itra	147	CADAFUAG00000955	AFUA_8G00380	Afu8G00380	DltD N-terminal domain protein [Source:UniProtKB/TrEMBL
CADAFUAG00000955	5.67071	0.041414	0.99178	0.0417572	0.966692	0.981851	Isa	147	CADAFUAG00000955	AFUA_8G00380	Afu8G00380	DltD N-terminal domain protein [Source:UniProtKB/TrEMBL
CADAFUAG00000956	6.88435	1.68647	0.950658	1.77401	0.0760619	0.131955	Itra	147	CADAFUAG00000956	AFUA_8G00560	Afu8G00560	Cytochrome P450 oxidoreductase; putative [Source:UniProtKB/TrEMBL
CADAFUAG00000956	6.88435	0.514235	0.912371	0.563625	0.573009	0.713696	Isa	147	CADAFUAG00000956	AFUA_8G00560	Afu8G00560	Cytochrome P450 oxidoreductase; putative [Source:UniProtKB/TrEMBL
CADAFUAG00000957	19.8792	3.80457	0.745828	5.10114	3.3762e-07	1.57484e-06	Itra	147	CADAFUAG00000957	AFUA_8G01060	Afu8G01060	Putative uncharacterized protein [Source:UniProtKB/TrEMBL
CADAFUAG00000957	19.8792	3.89842	0.879147	4.43432	9.2363e-06	4.70268e-05	Isa	147	CADAFUAG00000957	AFUA_8G01060	Afu8G01060	Putative uncharacterized protein [Source:UniProtKB/TrEMBL
CADAFUAG00000958	6.42935	1.83113	1.14249	1.60276	0.108988	0.179229	Itra	147	CADAFUAG00000958	AFUA_8G02160	Afu8G02160	Aldehyde dehydrogenase family protein [Source:UniProtKB/TrEMBL
CADAFUAG00000958	6.42935	0.737492	0.855831	0.861726	0.388838	0.54834	Isa	147	CADAFUAG00000958	AFUA_8G02160	Afu8G02160	Aldehyde dehydrogenase family protein [Source:UniProtKB/TrEMBL
CADAFUAG00000959	800.387	-1.22077	0.174753	-6.98568	2.83487e-12	2.15318e-11	Itra	147	CADAFUAG00000959	AFUA_8G01860	Afu8G01860	NmrA-like family protein [Source:UniProtKB/TrEMBL
CADAFUAG00000959	800.387	-0.0291321	0.152258	-0.191334	0.848264	0.913221	Isa	147	CADAFUAG00000959	AFUA_8G01860	Afu8G01860	NmrA-like family protein [Source:UniProtKB/TrEMBL
CADAFUAG00000960	2.23911	-2.69996	2.07123	-1.30356	0.192385	0.287618	Itra	147	CADAFUAG00000960	AFUA_8G01790	Afu8G01790	Integral membrane protein; putative [Source:UniProtKB/TrEMBL
CADAFUAG00000960	2.23911	-3.12122	1.6899	-1.84699	0.0647491	NA	Isa	147	CADAFUAG00000960	AFUA_8G01790	Afu8G01790	Integral membrane protein; putative [Source:UniProtKB/TrEMBL
CADAFUAG00000961	643.36	0.436218	0.139875	3.11864	0.00181689	0.00482376	Itra	147	CADAFUAG00000961	AFUA_8G02190	Afu8G02190	Putative uncharacterized protein [Source:UniProtKB/TrEMBL
CADAFUAG00000961	643.36	0.378944	0.137676	2.75243	0.00591544	0.0173708	Isa	147	CADAFUAG00000961	AFUA_8G02190	Afu8G02190	Putative uncharacterized protein [Source:UniProtKB/TrEMBL
CADAFUAG00000962	1.74999	1.37366	1.96791	0.698028	0.48516	0.597073	Itra	147	CADAFUAG00000962	AFUA_8G00210	Afu8G00210	Dimethylallyl tryptophan synthase FtmPT1 [Source:UniProtKB/TrEMBL
CADAFUAG00000962	1.74999	-0.0790718	1.70806	-0.0462934	0.963076	NA	Isa	147	CADAFUAG00000962	AFUA_8G00210	Afu8G00210	Dimethylallyl tryptophan synthase FtmPT1 [Source:UniProtKB/TrEMBL
CADAFUAG00000963	9.23257	-0.8947	0.935649	-0.956235	0.338954	0.454232	Itra	147	CADAFUAG00000963	AFUA_8G01280	Afu8G01280	Epsilon-lactone hydrolase; putative [Source:UniProtKB/TrEMBL
CADAFUAG00000963	9.23257	-1.0793	0.765362	-1.41018	0.158485	0.2783	Isa	147	CADAFUAG00000963	AFUA_8G01280	Afu8G01280	Epsilon-lactone hydrolase; putative [Source:UniProtKB/TrEMBL
CADAFUAG00000964	714.48	-0.964618	0.160651	-6.00442	1.9202e-09	1.1416e-08	Itra	147	CADAFUAG00000964	AFUA_8G00830	Afu8G00830	Putative uncharacterized protein [Source:UniProtKB/TrEMBL
CADAFUAG00000964	714.48	-1.36357	0.145107	-9.39705	5.61167e-21	1.11839e-19	Isa	147	CADAFUAG00000964	AFUA_8G00830	Afu8G00830	Putative uncharacterized protein [Source:UniProtKB/TrEMBL
CADAFUAG00000965	31.6445	1.48459	0.604818	2.45461	0.0141038	0.0301527	Itra	147	CADAFUAG00000965	AFUA_8G00360	Afu8G00360	NlpC/P60-like cell-wall peptidase; putative [Source:UniProtKB/TrEMBL
CADAFUAG00000965	31.6445	0.82739	0.411311	2.01159	0.044263	0.0993753	Isa	147	CADAFUAG00000965	AFUA_8G00360	Afu8G00360	NlpC/P60-like cell-wall peptidase; putative [Source:UniProtKB/TrEMBL
CADAFUAG00000966	77.1684	2.43337	0.314483	7.73767	1.01258e-14	9.30846e-14	Itra	147	CADAFUAG00000966	AFUA_8G01920	Afu8G01920	Putative uncharacterized protein [Source:UniProtKB/TrEMBL
CADAFUAG00000966	77.1684	1.66208	0.345791	4.80661	1.5351e-06	8.6731e-06	Isa	147	CADAFUAG00000966	AFUA_8G01920	Afu8G01920	Putative uncharacterized protein [Source:UniProtKB/TrEMBL
CADAFUAG00000967	10.2121	-0.344941	0.884608	-0.389936	0.696584	0.776073	Itra	147	CADAFUAG00000967	AFUA_8G01140	Afu8G01140	C6 transcription factor; putative [Source:UniProtKB/TrEMBL
CADAFUAG00000967	10.2121	-0.133376	0.680614	-0.195964	0.844639	0.911157	Isa	147	CADAFUAG00000967	AFUA_8G01140	Afu8G01140	C6 transcription factor; putative [Source:UniProtKB/TrEMBL
CADAFUAG00000968	41.3293	-0.965958	0.424401	-2.27605	0.0228429	0.0464094	Itra	147	CADAFUAG00000968	AFUA_8G01960	Afu8G01960	Putative uncharacterized protein [Source:UniProtKB/TrEMBL
CADAFUAG00000968	41.3293	-0.599484	0.381178	-1.57271	0.115785	0.21851	Isa	147	CADAFUAG00000968	AFUA_8G01960	Afu8G01960	Putative uncharacterized protein [Source:UniProtKB/TrEMBL
CADAFUAG00000969	32.1428	2.25044	0.597419	3.76693	0.000165268	0.000531797	Itra	147	CADAFUAG00000969	AFUA_8G02030	Afu8G02030	Putative uncharacterized protein [Source:UniProtKB/TrEMBL
CADAFUAG00000969	32.1428	0.504042	0.415006	1.21454	0.224541	0.364246	Isa	147	CADAFUAG00000969	AFUA_8G02030	Afu8G02030	Putative uncharacterized protein [Source:UniProtKB/TrEMBL
CADAFUAG00000970	391.796	-0.11473	0.160109	-0.716571	0.473639	0.587058	Itra	147	CADAFUAG00000970	AFUA_8G02870	Afu8G02870	Putative uncharacterized protein [Source:UniProtKB/TrEMBL
CADAFUAG00000970	391.796	-0.212218	0.140889	-1.50628	0.131995	0.242402	Isa	147	CADAFUAG00000970	AFUA_8G02870	Afu8G02870	Putative uncharacterized protein [Source:UniProtKB/TrEMBL
CADAFUAG00000971	8.08454	0.76643	1.03157	0.742975	0.457497	0.572007	Itra	147	CADAFUAG00000971	AFUA_8G00860	Afu8G00860	UDP-galactose 4-epimerase; putative [Source:UniProtKB/TrEMBL
CADAFUAG00000971	8.08454	-0.0935715	0.760344	-0.123065	0.902056	0.942738	Isa	147	CADAFUAG00000971	AFUA_8G00860	Afu8G00860	UDP-galactose 4-epimerase; putative [Source:UniProtKB/TrEMBL
CADAFUAG00000972	6.92877	-2.14569	1.30922	-1.6389	0.101234	0.168533	Itra	147	CADAFUAG00000972	AFUA_8G00890	Afu8G00890	MFS glucose transporter; putative [Source:UniProtKB/TrEMBL
CADAFUAG00000972	6.92877	0.29722	0.825243	0.360161	0.718727	0.82562	Isa	147	CADAFUAG00000972	AFUA_8G00890	Afu8G00890	MFS glucose transporter; putative [Source:UniProtKB/TrEMBL
CADAFUAG00000973	7.19639	6.85082	3.56688	1.92068	0.0547725	0.0996353	Itra	147	CADAFUAG00000973	AFUA_8G00550	Afu8G00550	Methyltransferase SirN-like; putative [Source:UniProtKB/TrEMBL
CADAFUAG00000973	7.19639	2.73396	3.59902	0.759641	0.447469	0.604567	Isa	147	CADAFUAG00000973	AFUA_8G00550	Afu8G00550	Methyltransferase SirN-like; putative [Source:UniProtKB/TrEMBL
CADAFUAG00000974	4.16573	-1.98954	1.69642	-1.17279	0.240879	0.345655	Itra	147	CADAFUAG00000974	AFUA_8G01210	Afu8G01210	Enoyl-CoA hydratase/isomerase family protein [Source:UniProtKB/TrEMBL
CADAFUAG00000974	4.16573	1.5436	1.10313	1.3993	0.161724	0.282744	Isa	147	CADAFUAG00000974	AFUA_8G01210	Afu8G01210	Enoyl-CoA hydratase/isomerase family protein [Source:UniProtKB/TrEMBL
CADAFUAG00000975	42.2407	0.539071	0.437446	1.23232	0.217831	0.318302	Itra	147	CADAFUAG00000975	AFUA_8G02630	Afu8G02630	Probable exopolygalacturonase B [Source:UniProtKB/Swiss-Prot
CADAFUAG00000975	42.2407	0.37884	0.365505	1.03648	0.299977	0.454653	Isa	147	CADAFUAG00000975	AFUA_8G02630	Afu8G02630	Probable exopolygalacturonase B [Source:UniProtKB/Swiss-Prot
CADAFUAG00000976	4.90401	-1.2528	1.18772	-1.05479	0.291523	0.403499	Itra	147	CADAFUAG00000976	AFUA_8G00120	Afu8G00120	Putative uncharacterized protein [Source:UniProtKB/TrEMBL
CADAFUAG00000976	4.90401	0.315052	1.02491	0.307394	0.758544	0.853515	Isa	147	CADAFUAG00000976	AFUA_8G00120	Afu8G00120	Putative uncharacterized protein [Source:UniProtKB/TrEMBL
CADAFUAG00000977	73.4612	5.15032	0.538253	9.56858	1.08387e-21	1.56705e-20	Itra	147	CADAFUAG00000977	AFUA_8G00420	Afu8G00420	C6 finger transcription factor; putative [Source:UniProtKB/TrEMBL
CADAFUAG00000977	73.4612	2.30792	0.360501	6.40199	1.53367e-10	1.40054e-09	Isa	147	CADAFUAG00000977	AFUA_8G00420	Afu8G00420	C6 finger transcription factor; putative [Source:UniProtKB/TrEMBL
CADAFUAG00000978	188.657	0.461141	0.234961	1.96263	0.0496897	0.0918225	Itra	147	CADAFUAG00000978	AFUA_8G01910	Afu8G01910	Histidine acid phosphatase; putative [Source:UniProtKB/TrEMBL
CADAFUAG00000978	188.657	-0.359027	0.186332	-1.92681	0.0540029	0.117237	Isa	147	CADAFUAG00000978	AFUA_8G01910	Afu8G01910	Histidine acid phosphatase; putative [Source:UniProtKB/TrEMBL
CADAFUAG00000979	47.5991	-1.1498	0.437958	-2.62537	0.00865556	0.019573	Itra	147	CADAFUAG00000979	AFUA_8G01222	Afu8G01222	NRPS-like enzyme; putative [Source:UniProtKB/TrEMBL
CADAFUAG00000979	47.5991	0.889537	0.318215	2.7954	0.00518362	0.0154918	Isa	147	CADAFUAG00000979	AFUA_8G01222	Afu8G01222	NRPS-like enzyme; putative [Source:UniProtKB/TrEMBL
CADAFUAG00000980	0.2387	0.81391	4.75243	0.171262	0.864018	NA	Itra	147	CADAFUAG00000980	AFUA_8G00595	Afu8G00595	Ham1 family pyrophosphatase; putative [Source:UniProtKB/TrEMBL
CADAFUAG00000980	0.2387	-0.535337	4.6024	-0.116317	0.907401	NA	Isa	147	CADAFUAG00000980	AFUA_8G00595	Afu8G00595	Ham1 family pyrophosphatase; putative [Source:UniProtKB/TrEMBL
CADAFUAG00000981	8.29316	-0.517433	1.0143	-0.510139	0.609954	0.707355	Itra	147	CADAFUAG00000981	AFUA_8G01590	Afu8G01590	Putative uncharacterized protein [Source:UniProtKB/TrEMBL
CADAFUAG00000981	8.29316	0.145358	0.762838	0.190549	0.848879	0.913341	Isa	147	CADAFUAG00000981	AFUA_8G01590	Afu8G01590	Putative uncharacterized protein [Source:UniProtKB/TrEMBL
CADAFUAG00000982	5.26198	0.812615	1.17085	0.69404	0.487657	0.599163	Itra	147	CADAFUAG00000982	AFUA_8G00150	Afu8G00150	Putative uncharacterized protein [Source:UniProtKB/TrEMBL
CADAFUAG00000982	5.26198	-0.8662	0.987443	-0.877215	0.38037	0.539437	Isa	147	CADAFUAG00000982	AFUA_8G00150	Afu8G00150	Putative uncharacterized protein [Source:UniProtKB/TrEMBL
CADAFUAG00000983	1.8539	2.64883	2.13529	1.2405	0.21479	0.314783	Itra	147	CADAFUAG00000983	AFUA_8G01640	Afu8G01640	NRPS-like enzyme; putative [Source:UniProtKB/TrEMBL
CADAFUAG00000983	1.8539	0.125051	1.75327	0.0713245	0.94314	NA	Isa	147	CADAFUAG00000983	AFUA_8G01640	Afu8G01640	NRPS-like enzyme; putative [Source:UniProtKB/TrEMBL
CADAFUAG00000984	47.3102	-1.85141	0.456704	-4.05386	5.03797e-05	0.000176226	Itra	147	CADAFUAG00000984	AFUA_8G01270	Afu8G01270	Beta-lactamase; putative [Source:UniProtKB/TrEMBL
CADAFUAG00000984	47.3102	0.045896	0.33574	0.136701	0.891267	0.937588	Isa	147	CADAFUAG00000984	AFUA_8G01270	Afu8G01270	Beta-lactamase; putative [Source:UniProtKB/TrEMBL
CADAFUAG00000985	2.50568	1.30644	1.63375	0.799655	0.423911	0.540111	Itra	147	CADAFUAG00000985	AFUA_8G02300	Afu8G02300	FMN-dependent dehydrogenase family protein [Source:UniProtKB/TrEMBL
CADAFUAG00000985	2.50568	-1.37423	1.57477	-0.872656	0.382851	NA	Isa	147	CADAFUAG00000985	AFUA_8G02300	Afu8G02300	FMN-dependent dehydrogenase family protein [Source:UniProtKB/TrEMBL
CADAFUAG00000986	66.7102	0.362534	0.409931	0.884378	0.376492	0.49224	Itra	147	CADAFUAG00000986	AFUA_8G00800	Afu8G00800	Amino acid transporter; putative [Source:UniProtKB/TrEMBL
CADAFUAG00000986	66.7102	1.67674	0.284303	5.89773	3.68536e-09	2.87598e-08	Isa	147	CADAFUAG00000986	AFUA_8G00800	Afu8G00800	Amino acid transporter; putative [Source:UniProtKB/TrEMBL
CADAFUAG00000987	5.94662	-5.0214	1.66549	-3.01497	0.00257005	0.00659165	Itra	147	CADAFUAG00000987	AFUA_8G00670	Afu8G00670	Integral membrane protein [Source:UniProtKB/TrEMBL
CADAFUAG00000987	5.94662	-1.90278	0.982289	-1.93709	0.0527345	0.114813	Isa	147	CADAFUAG00000987	AFUA_8G00670	Afu8G00670	Integral membrane protein [Source:UniProtKB/TrEMBL
CADAFUAG00000988	671.392	-1.26795	0.171289	-7.40243	1.33716e-13	1.1312e-12	Itra	147	CADAFUAG00000988	AFUA_8G01340	Afu8G01340	MFS sugar transporter; putative [Source:UniProtKB/TrEMBL
CADAFUAG00000988	671.392	-0.720791	0.139412	-5.17022	2.33815e-07	1.46729e-06	Isa	147	CADAFUAG00000988	AFUA_8G01340	Afu8G01340	MFS sugar transporter; putative [Source:UniProtKB/TrEMBL
CADAFUAG00000989	17.5051	-0.118897	0.622295	-0.191062	0.848477	0.895025	Itra	147	CADAFUAG00000989	AFUA_8G01310	Afu8G01310	Ferric-chelate reductase (Fre2); putative [Source:UniProtKB/TrEMBL
CADAFUAG00000989	17.5051	1.02516	0.58719	1.74588	0.0808327	0.164237	Isa	147	CADAFUAG00000989	AFUA_8G01310	Afu8G01310	Ferric-chelate reductase (Fre2); putative [Source:UniProtKB/TrEMBL
CADAFUAG00000990	19.9116	2.43396	0.640278	3.80141	0.000143873	0.00046677	Itra	147	CADAFUAG00000990	AFUA_8G00390	Afu8G00390	O-methyltransferase; putative [Source:UniProtKB/TrEMBL
CADAFUAG00000990	19.9116	1.21746	0.543391	2.24048	0.0250596	0.0612178	Isa	147	CADAFUAG00000990	AFUA_8G00390	Afu8G00390	O-methyltransferase; putative [Source:UniProtKB/TrEMBL
CADAFUAG00000991	0.265463	0	4.92094	0	1	NA	Itra	147	CADAFUAG00000991	AFUA_8G00100	Afu8G00100	Aspartate-tRNA ligase; putative [Source:UniProtKB/TrEMBL
CADAFUAG00000991	0.265463	3.38202	4.77274	0.708611	0.478566	NA	Isa	147	CADAFUAG00000991	AFUA_8G00100	Afu8G00100	Aspartate-tRNA ligase; putative [Source:UniProtKB/TrEMBL
CADAFUAG00000992	5.06253	1.67211	1.16309	1.43764	0.150536	0.234561	Itra	147	CADAFUAG00000992	AFUA_8G00230	Afu8G00230	Phytanoyl-CoA dioxygenase family protein [Source:UniProtKB/TrEMBL
CADAFUAG00000992	5.06253	1.53853	1.05374	1.46007	0.14427	0.259263	Isa	147	CADAFUAG00000992	AFUA_8G00230	Afu8G00230	Phytanoyl-CoA dioxygenase family protein [Source:UniProtKB/TrEMBL
CADAFUAG00000993	4.17444	2.14668	1.38586	1.54899	0.121385	0.196299	Itra	147	CADAFUAG00000993	AFUA_8G02330	Afu8G02330	Endoglucanase; putative [Source:UniProtKB/TrEMBL
CADAFUAG00000993	4.17444	2.30187	1.34716	1.70868	0.0875103	0.174674	Isa	147	CADAFUAG00000993	AFUA_8G02330	Afu8G02330	Endoglucanase; putative [Source:UniProtKB/TrEMBL
CADAFUAG00000994	1.9826	0.23139	1.82464	0.126814	0.899087	0.932779	Itra	147	CADAFUAG00000994	AFUA_8G01470	Afu8G01470	Flavin containing amine oxidase; putative [Source:UniProtKB/TrEMBL
CADAFUAG00000994	1.9826	-0.298519	1.51776	-0.196685	0.844074	NA	Isa	147	CADAFUAG00000994	AFUA_8G01470	Afu8G01470	Flavin containing amine oxidase; putative [Source:UniProtKB/TrEMBL
CADAFUAG00000995	661.449	-0.477816	0.145469	-3.28466	0.00102107	0.00285627	Itra	147	CADAFUAG00000995	AFUA_8G00950	Afu8G00950	Putative uncharacterized protein [Source:UniProtKB/TrEMBL
CADAFUAG00000995	661.449	-0.404209	0.131934	-3.06373	0.002186	0.00722925	Isa	147	CADAFUAG00000995	AFUA_8G00950	Afu8G00950	Putative uncharacterized protein [Source:UniProtKB/TrEMBL
CADAFUAG00000996	153.532	0.819958	0.223415	3.67011	0.000242446	0.000756172	Itra	147	CADAFUAG00000996	AFUA_8G00720	Afu8G00720	Amino acid transporter; putative [Source:UniProtKB/TrEMBL
CADAFUAG00000996	153.532	0.158049	0.206819	0.76419	0.444754	0.602484	Isa	147	CADAFUAG00000996	AFUA_8G00720	Afu8G00720	Amino acid transporter; putative [Source:UniProtKB/TrEMBL
CADAFUAG00000997	577.355	0.548416	0.146762	3.73677	0.000186396	0.000594114	Itra	147	CADAFUAG00000997	AFUA_8G02800	Afu8G02800	Putative uncharacterized protein [Source:UniProtKB/TrEMBL
CADAFUAG00000997	577.355	0.296289	0.129535	2.28733	0.0221766	0.0551102	Isa	147	CADAFUAG00000997	AFUA_8G02800	Afu8G02800	Putative uncharacterized protein [Source:UniProtKB/TrEMBL
CADAFUAG00000998	34.7898	-0.351183	0.552692	-0.635404	0.525165	0.631041	Itra	147	CADAFUAG00000998	AFUA_8G02280	Afu8G02280	C6 transcription factor; putative [Source:UniProtKB/TrEMBL
CADAFUAG00000998	34.7898	-0.700814	0.389159	-1.80084	0.0717279	0.14884	Isa	147	CADAFUAG00000998	AFUA_8G02280	Afu8G02280	C6 transcription factor; putative [Source:UniProtKB/TrEMBL
CADAFUAG00000999	79.6682	0.819451	0.292709	2.79954	0.00511755	0.0123032	Itra	147	CADAFUAG00000999	AFUA_8G01700	Afu8G01700	Haloalkane dehalogenase family protein [Source:UniProtKB/TrEMBL
CADAFUAG00000999	79.6682	0.871585	0.28098	3.10195	0.00192254	0.00643067	Isa	147	CADAFUAG00000999	AFUA_8G01700	Afu8G01700	Haloalkane dehalogenase family protein [Source:UniProtKB/TrEMBL
CADAFUAG00001000	272.946	-1.70519	0.197243	-8.64514	5.37372e-18	6.24702e-17	Itra	147	CADAFUAG00001000	AFUA_8G00280	Afu8G00280	Short-chain dehydrogenase; putative [Source:UniProtKB/TrEMBL
[truncated: 57,389 more rows]

## Sheet: All DEGs
	baseMean	log2FoldChange	lfcSE	stat	pvalue	padj	Treatment	Isolate
CADAFUAG00004412	4432.35	7.25878	0.155781	46.5959	0	0	Itra	147	CADAFUAG00004412	AFUA_2G10130	Afu2G10130	Adhesin; putative [Source:UniProtKB/TrEMBL
CADAFUAG00002465	14341.9	5.81025	0.136656	42.5174	0	0	Itra	147	CADAFUAG00002465	AFUA_4G01290	Afu4G01290
CADAFUAG00002638	21064.8	-5.58762	0.11313	-49.3913	0	0	Itra	147	CADAFUAG00002638	AFUA_5G01030	Afu5G01030	Glyceraldehyde-3-phosphate dehydrogenase [Source:UniProtKB/TrEMBL		DMSO down
CADAFUAG00002638	21064.8	-5.59737	0.0944456	-59.2655	0	0	Isa	147	CADAFUAG00002638	AFUA_5G01030	Afu5G01030	Glyceraldehyde-3-phosphate dehydrogenase [Source:UniProtKB/TrEMBL		DMSO down
CADAFUAG00004138	19546.6	3.92715	0.104964	37.4142	2.29479e-306	5.41627e-303	Itra	147	CADAFUAG00004138	AFUA_2G12630	Afu2G12630	Allergen Asp f 15 [Source:UniProtKB/Swiss-Prot
CADAFUAG00002637	1903.77	5.72156	0.154605	37.0077	8.61436e-300	1.62656e-296	Itra	147	CADAFUAG00002637	AFUA_5G02330	Afu5G02330	Ribonuclease mitogillin Aspf1 [Source:UniProtKB/Swiss-Prot
CADAFUAG00005653	2316.3	7.19214	0.196946	36.5184	5.66587e-292	8.91525e-289	Itra	147	CADAFUAG00005653	AFUA_3G12930	Afu3G12930	7-dimethylallyltryptophan synthase [Source:UniProtKB/Swiss-Prot
CADAFUAG00005596	18087.8	-3.81196	0.115874	-32.8976	2.38133e-237	3.21174e-234	Itra	147	CADAFUAG00005596	AFUA_3G14940	Afu3G14940	Elastase inhibitor AFUEI [Source:UniProtKB/Swiss-Prot		DMSO down
CADAFUAG00005185	1396.82	7.16836	0.221985	32.2921	9.03452e-229	1.06619e-225	Itra	147	CADAFUAG00005185	AFUA_3G12960	Afu3G12960	Cytochrome P450 monooxigenase GliC-like; putative [Source:UniProtKB/TrEMBL
CADAFUAG00009075	4921.7	3.76611	0.119013	31.6446	8.9977e-220	9.43858e-217	Itra	147	CADAFUAG00009075	AFUA_1G02290	Afu1G02290	Putative uncharacterized protein [Source:UniProtKB/TrEMBL
CADAFUAG00008500	35998.7	-3.08543	0.0980474	-31.4687	2.3258e-217	2.19579e-214	Itra	147	CADAFUAG00008500	AFUA_4G14380	Afu4G14380	Glutathione S-transferase; putative [Source:UniProtKB/TrEMBL
CADAFUAG00009079	4778.96	3.61178	0.115215	31.3483	1.02727e-215	8.81681e-213	Itra	147	CADAFUAG00009079	AFUA_1G04750	Afu1G04750	Cyclin (Pcl1); putative [Source:UniProtKB/TrEMBL
CADAFUAG00000384	1150.29	6.44585	0.208886	30.8582	4.34677e-209	3.41982e-206	Itra	147	CADAFUAG00000384	AFUA_3G01500	Afu3G01500	Integral membrane protein [Source:UniProtKB/TrEMBL
CADAFUAG00000063	1986.24	-3.89258	0.126194	-30.846	6.33472e-209	2.87216e-205	Isa	147	CADAFUAG00000063	AFUA_3G03640	Afu3G03640	MFS siderochrome iron transporter MirB [Source:UniProtKB/TrEMBL
CADAFUAG00002465	14341.9	3.97632	0.130374	30.4994	2.65659e-204	8.02998e-201	Isa	147	CADAFUAG00002465	AFUA_4G01290	Afu4G01290
CADAFUAG00000011	1059.58	6.3976	0.215172	29.7325	2.91854e-194	2.11953e-191	Itra	147	CADAFUAG00000011	AFUA_3G01960	Afu3G01960	Putative uncharacterized protein [Source:UniProtKB/TrEMBL
CADAFUAG00004480	1507.66	4.44737	0.153332	29.0048	5.72153e-185	3.85835e-182	Itra	147	CADAFUAG00004480	AFUA_2G16060	Afu2G16060	Putative uncharacterized protein [Source:UniProtKB/TrEMBL
CADAFUAG00001530	1833.82	3.64534	0.126534	28.8092	1.64392e-182	1.03468e-179	Itra	147	CADAFUAG00001530	AFUA_6G00180	Afu6G00180	Putative uncharacterized protein [Source:UniProtKB/TrEMBL
CADAFUAG00005596	18087.8	-3.38563	0.117607	-28.7877	3.06146e-182	6.94032e-179	Isa	147	CADAFUAG00005596	AFUA_3G14940	Afu3G14940	Elastase inhibitor AFUEI [Source:UniProtKB/Swiss-Prot		DMSO down
CADAFUAG00007560	1498.32	3.96274	0.138052	28.7047	3.33585e-181	1.96836e-178	Itra	147	CADAFUAG00007560	AFUA_1G12410	Afu1G12410	Salicylate hydroxylase; putative [Source:UniProtKB/TrEMBL
CADAFUAG00004565	2268.99	3.28244	0.116416	28.1957	6.60558e-175	3.66843e-172	Itra	147	CADAFUAG00004565	AFUA_2G16520	Afu2G16520	Phospholipase D (PLD); putative [Source:UniProtKB/TrEMBL
CADAFUAG00008147	1469.2	3.82127	0.135768	28.1456	2.71078e-174	1.4218e-171	Itra	147	CADAFUAG00008147	AFUA_4G14640	Afu4G14640	Low affinity iron transporter; putative [Source:UniProtKB/TrEMBL
CADAFUAG00002077	3904.11	3.32145	0.118229	28.0933	1.18236e-173	5.87508e-171	Itra	147	CADAFUAG00002077	AFUA_6G07470	Afu6G07470	Integral membrane protein [Source:UniProtKB/TrEMBL
CADAFUAG00003644	2281.51	-4.31856	0.156049	-27.6744	1.41951e-168	6.70078e-166	Itra	147	CADAFUAG00003644	AFUA_2G01590	Afu2G01590	Non-classical export protein Nce102; putative [Source:UniProtKB/TrEMBL
CADAFUAG00000866	1656.71	3.91934	0.143475	27.3173	2.64645e-164	1.18977e-161	Itra	147	CADAFUAG00000866	AFUA_8G02090	Afu8G02090	Nucleotide-sugar transporter; putative [Source:UniProtKB/TrEMBL
CADAFUAG00007979	4588.04	3.74246	0.138083	27.103	9.07181e-162	3.89304e-159	Itra	147	CADAFUAG00007979	AFUA_4G13990	Afu4G13990	Putative uncharacterized protein [Source:UniProtKB/TrEMBL
CADAFUAG00000389	1551.49	4.17592	0.154957	26.9489	5.88001e-160	2.41362e-157	Itra	147	CADAFUAG00000389	AFUA_3G03550	Afu3G03550	Putative uncharacterized protein [Source:UniProtKB/TrEMBL
CADAFUAG00004153	1422.05	4.35762	0.162311	26.8473	9.06328e-159	3.56527e-156	Itra	147	CADAFUAG00004153	AFUA_2G12680	Afu2G12680	Putative uncharacterized protein [Source:UniProtKB/TrEMBL
CADAFUAG00001010	887.767	5.20831	0.194783	26.739	1.65823e-157	6.26212e-155	Itra	147	CADAFUAG00001010	AFUA_8G02070	Afu8G02070	Glycosyl transferase; putative [Source:UniProtKB/TrEMBL
CADAFUAG00004329	2869.33	2.87121	0.108957	26.3516	4.91592e-153	1.78505e-150	Itra	147	CADAFUAG00004329	AFUA_2G13930	Afu2G13930	Putative uncharacterized protein [Source:UniProtKB/TrEMBL
CADAFUAG00003681	3728.38	2.77503	0.107034	25.9266	3.3434e-148	1.16908e-145	Itra	147	CADAFUAG00003681	AFUA_2G03860	Afu2G03860	Plasma membrane low affinity zinc ion transporter; putative [Source:UniProtKB/TrEMBL
CADAFUAG00003670	3094.73	2.64564	0.102314	25.8579	1.98118e-147	6.68012e-145	Itra	147	CADAFUAG00003670	AFUA_2G00320	Afu2G00320	Sterol delta 5;6-desaturase; putative [Source:UniProtKB/TrEMBL
CADAFUAG00005149	1736.03	-2.89293	0.112855	-25.6342	6.34941e-145	1.15153e-141	Isa	147	CADAFUAG00005149	AFUA_3G15050	Afu3G15050	Flavin-binding monooxygenase; putative [Source:UniProtKB/TrEMBL
CADAFUAG00001498	8039.72	-3.14418	0.124015	-25.3533	8.27014e-142	2.69236e-139	Itra	147	CADAFUAG00001498	AFUA_6G00740	Afu6G00740	Putative uncharacterized protein [Source:UniProtKB/TrEMBL
CADAFUAG00007814	3029.65	3.37798	0.133491	25.3049	2.81846e-141	4.25963e-138	Isa	147	CADAFUAG00007814	AFUA_4G09550	Afu4G09550	Putative uncharacterized protein [Source:UniProtKB/TrEMBL
CADAFUAG00007417	19302.9	-2.9208	0.115785	-25.2261	2.07121e-140	6.51808e-138	Itra	147	CADAFUAG00007417	AFUA_1G10630	Afu1G10630	S-adenosylmethionine synthase [Source:UniProtKB/TrEMBL
CADAFUAG00002989	1161.48	8.2559	0.329169	25.0811	8.00673e-139	2.43844e-136	Itra	147	CADAFUAG00002989	AFUA_8G06070	Afu8G06070	Putative uncharacterized protein [Source:UniProtKB/TrEMBL
CADAFUAG00001165	473.947	4.5357	0.180576	25.1179	3.16919e-139	4.10546e-136	Isa	147	CADAFUAG00001165	AFUA_7G00180	Afu7G00180	NAD dependent epimerase/dehydratase; putative [Source:UniProtKB/TrEMBL
CADAFUAG00003911	2784.78	2.70768	0.108172	25.0312	2.79679e-138	8.25139e-136	Itra	147	CADAFUAG00003911	AFUA_2G08660	Afu2G08660	Putative uncharacterized protein [Source:UniProtKB/TrEMBL
CADAFUAG00004363	4492.43	2.79065	0.111921	24.934	3.18647e-137	9.11619e-135	Itra	147	CADAFUAG00004363	AFUA_2G08650	Afu2G08650	RING finger membrane protein [Source:UniProtKB/TrEMBL
CADAFUAG00002625	5219.25	2.39334	0.0962203	24.8735	1.4406e-136	4.0002e-134	Itra	147	CADAFUAG00002625	AFUA_5G01920	Afu5G01920	GPI anchored protein; putative [Source:UniProtKB/TrEMBL
CADAFUAG00004682	2072.36	2.50644	0.102388	24.4799	2.41879e-132	2.7417e-129	Isa	147	CADAFUAG00004682	AFUA_2G12470	Afu2G12470	Acetylornithine aminotransferase [Source:UniProtKB/TrEMBL
CADAFUAG00004352	1535.72	3.40759	0.140059	24.3296	9.52734e-131	2.56993e-128	Itra	147	CADAFUAG00004352	AFUA_2G15130	Afu2G15130	ABC multidrug transporter; putative [Source:UniProtKB/TrEMBL
CADAFUAG00003878	6759.44	-2.44419	0.10104	-24.1904	2.80912e-129	2.83034e-126	Isa	147	CADAFUAG00003878	AFUA_2G05450	Afu2G05450	NADH-ubiquinone oxidoreductase 64 kDa subunit; putative [Source:UniProtKB/TrEMBL
CADAFUAG00004352	1535.72	3.15486	0.131107	24.0633	6.06594e-128	5.5006e-125	Isa	147	CADAFUAG00004352	AFUA_2G15130	Afu2G15130	ABC multidrug transporter; putative [Source:UniProtKB/TrEMBL
CADAFUAG00000856	40513.2	3.19561	0.133685	23.9041	2.77352e-126	2.28639e-123	Isa	147	CADAFUAG00000856	AFUA_8G01710	Afu8G01710	Antigenic thaumatin domain protein; putative [Source:UniProtKB/TrEMBL
CADAFUAG00008573	2124.49	2.95633	0.124277	23.7882	4.42214e-125	1.15971e-122	Itra	147	CADAFUAG00008573	AFUA_4G14070	Afu4G14070	Glycosyl transferase; putative [Source:UniProtKB/TrEMBL
CADAFUAG00008399	794.062	3.42083	0.14386	23.7789	5.52629e-125	1.4101e-122	Itra	147	CADAFUAG00008399	AFUA_4G07080	Afu4G07080	Dual specificity phosphatase; putative [Source:UniProtKB/TrEMBL
CADAFUAG00000529	2574.85	-3.71868	0.156654	-23.7382	1.45496e-124	3.61481e-122	Itra	147	CADAFUAG00000529	AFUA_6G04360	Afu6G04360	ABC drug exporter AtrF [Source:UniProtKB/TrEMBL
CADAFUAG00001497	1202.36	-3.89255	0.165127	-23.5731	7.27405e-123	1.76088e-120	Itra	147	CADAFUAG00001497	AFUA_6G00730	Afu6G00730	Putative uncharacterized protein [Source:UniProtKB/TrEMBL
CADAFUAG00007998	881.078	2.87414	0.122648	23.434	1.92392e-121	1.45384e-118	Isa	147	CADAFUAG00007998	AFUA_4G09140	Afu4G09140	L-ornithine aminotransferase Car2; putative [Source:UniProtKB/TrEMBL
CADAFUAG00000149	4240.14	-2.97391	0.127378	-23.347	1.47667e-120	3.4853e-118	Itra	147	CADAFUAG00000149	AFUA_3G00370	Afu3G00370	Phosphoketolase; putative [Source:UniProtKB/TrEMBL
CADAFUAG00000063	1986.24	-3.21235	0.137839	-23.305	3.94058e-120	9.0739e-118	Itra	147	CADAFUAG00000063	AFUA_3G03640	Afu3G03640	MFS siderochrome iron transporter MirB [Source:UniProtKB/TrEMBL
CADAFUAG00007043	2512.93	-3.00064	0.128843	-23.2892	5.70724e-120	1.28291e-117	Itra	147	CADAFUAG00007043	AFUA_1G16710	Afu1G16710	Fatty acid elongase (Gig30); putative [Source:UniProtKB/TrEMBL
CADAFUAG00001556	2041.75	-2.73614	0.117376	-23.311	3.42838e-120	2.39142e-117	Isa	147	CADAFUAG00001556	AFUA_6G00750	Afu6G00750	Pyruvate decarboxylase; putative [Source:UniProtKB/TrEMBL
CADAFUAG00003651	1579.76	-3.25971	0.140319	-23.2307	2.22885e-119	4.89361e-117	Itra	147	CADAFUAG00003651	AFUA_2G00570	Afu2G00570	GNAT family acetyltransferase; putative [Source:UniProtKB/TrEMBL
CADAFUAG00002657	864.13	3.14246	0.135073	23.265	1.00334e-119	6.49877e-117	Isa	147	CADAFUAG00002657	AFUA_5G00500	Afu5G00500	MFS alpha-glucoside transporter; putative [Source:UniProtKB/TrEMBL
CADAFUAG00001249	324.037	4.46082	0.192936	23.1207	2.8654e-118	1.73223e-115	Isa	147	CADAFUAG00001249	AFUA_7G00200	Afu7G00200	Putative uncharacterized protein [Source:UniProtKB/TrEMBL
CADAFUAG00001010	887.767	3.56493	0.15448	23.077	7.88506e-118	4.46886e-115	Isa	147	CADAFUAG00001010	AFUA_8G02070	Afu8G02070	Glycosyl transferase; putative [Source:UniProtKB/TrEMBL
CADAFUAG00009452	1333.33	2.78265	0.121203	22.9586	1.21006e-116	2.5964e-114	Itra	147	CADAFUAG00009452	AFUA_7G04870	Afu7G04870	Glutamine-serine-proline rich protein; putative [Source:UniProtKB/TrEMBL
CADAFUAG00001001	2446.38	2.51365	0.109547	22.9459	1.61955e-116	3.39782e-114	Itra	147	CADAFUAG00001001	AFUA_8G01260	Afu8G01260	Putative uncharacterized protein [Source:UniProtKB/TrEMBL
CADAFUAG00005954	1112.47	-2.79563	0.122577	-22.8072	3.88928e-115	2.07459e-112	Isa	147	CADAFUAG00005954	AFUA_5G13970	Afu5G13970	WD domain; G-beta repeat protein [Source:UniProtKB/TrEMBL
CADAFUAG00000388	8482.81	-2.30311	0.101291	-22.7375	1.90766e-114	3.91526e-112	Itra	147	CADAFUAG00000388	AFUA_3G00720	Afu3G00720	DUF500 and UBA/TS-N domain protein [Source:UniProtKB/TrEMBL
CADAFUAG00005679	1210.06	2.86858	0.126229	22.7253	2.51797e-114	5.05791e-112	Itra	147	CADAFUAG00005679	AFUA_3G09110	Afu3G09110	Putative uncharacterized protein [Source:UniProtKB/TrEMBL
CADAFUAG00005819	1262.3	9.15446	0.404111	22.6533	1.29313e-113	2.54342e-111	Itra	147	CADAFUAG00005819	AFUA_3G12910	Afu3G12910	O-methyltransferase GliM-like; putative [Source:UniProtKB/TrEMBL
CADAFUAG00007757	857.171	3.17634	0.140318	22.6367	1.88509e-113	3.63206e-111	Itra	147	CADAFUAG00007757	AFUA_4G14080	Afu4G14080	Spherulin 4-like cell surface protein; putative [Source:UniProtKB/TrEMBL
CADAFUAG00006737	6267.79	-2.48101	0.110164	-22.5211	2.57945e-112	4.87051e-110	Itra	147	CADAFUAG00006737	AFUA_5G09240	Afu5G09240	Superoxide dismutase [Source:UniProtKB/Swiss-Prot
CADAFUAG00005356	25370.5	7.24719	0.322026	22.5049	3.71316e-112	6.87371e-110	Itra	147	CADAFUAG00005356	AFUA_3G12900	Afu3G12900	MFS transporter; putative [Source:UniProtKB/TrEMBL
CADAFUAG00001902	527.98	6.24345	0.278753	22.3978	4.13361e-111	7.50488e-109	Itra	147	CADAFUAG00001902	AFUA_6G14140	Afu6G14140	RTA1 domain protein; putative [Source:UniProtKB/TrEMBL
CADAFUAG00006933	9370.66	2.20661	0.0992943	22.2229	2.06162e-109	3.67241e-107	Itra	147	CADAFUAG00006933	AFUA_1G13050	Afu1G13050	C2H2 transcription factor; putative [Source:UniProtKB/TrEMBL
CADAFUAG00002463	784.355	-4.74613	0.213597	-22.2201	2.19809e-109	3.84299e-107	Itra	147	CADAFUAG00002463	AFUA_4G00450	Afu4G00450	Putative uncharacterized protein [Source:UniProtKB/TrEMBL
CADAFUAG00001295	691.92	3.3294	0.149791	22.227	1.88263e-109	9.48427e-107	Isa	147	CADAFUAG00001295	AFUA_4G03630	Afu4G03630	Sterol 24-c-methyltransferase; putative [Source:UniProtKB/TrEMBL
CADAFUAG00005878	2842.6	2.34605	0.106248	22.081	4.81745e-108	8.26938e-106	Itra	147	CADAFUAG00005878	AFUA_3G13440	Afu3G13440	Stomatin family protein [Source:UniProtKB/TrEMBL
CADAFUAG00001918	1639.67	2.69521	0.122975	21.9166	1.80276e-106	3.03926e-104	Itra	147	CADAFUAG00001918	AFUA_6G07720	Afu6G07720	Phosphoenolpyruvate carboxykinase AcuF [Source:UniProtKB/TrEMBL
CADAFUAG00005807	768.399	4.42052	0.20262	21.8168	1.60873e-105	2.66457e-103	Itra	147	CADAFUAG00005807	AFUA_3G10370	Afu3G10370	Putative uncharacterized protein [Source:UniProtKB/TrEMBL
CADAFUAG00000384	1150.29	3.61173	0.166027	21.7538	6.35548e-105	3.03323e-102	Isa	147	CADAFUAG00000384	AFUA_3G01500	Afu3G01500	Integral membrane protein [Source:UniProtKB/TrEMBL
CADAFUAG00007181	1086.03	-3.55496	0.163855	-21.6957	2.25312e-104	3.66754e-102	Itra	147	CADAFUAG00007181	AFUA_1G15550	Afu1G15550	Homeobox and C2H2 transcription factor; putative [Source:UniProtKB/TrEMBL
CADAFUAG00005360	561.732	7.2876	0.336214	21.6755	3.4954e-104	5.59323e-102	Itra	147	CADAFUAG00005360	AFUA_3G12920	Afu3G12920	Nonribosomal peptide synthetase 5 [Source:UniProtKB/Swiss-Prot
CADAFUAG00000802	443.406	4.90828	0.226516	21.6686	4.0633e-104	6.3936e-102	Itra	147	CADAFUAG00000802	AFUA_8G02060	Afu8G02060	Glycan biosynthesis protein (PigL); putative [Source:UniProtKB/TrEMBL
CADAFUAG00002718	826.436	3.11255	0.144431	21.5504	5.25321e-103	8.13042e-101	Itra	147	CADAFUAG00002718	AFUA_5G02320	Afu5G02320	Putative uncharacterized protein [Source:UniProtKB/TrEMBL		Co regulated with ASpf1
CADAFUAG00004480	1507.66	2.74028	0.127074	21.5645	3.87379e-103	1.75638e-100	Isa	147	CADAFUAG00004480	AFUA_2G16060	Afu2G16060	Putative uncharacterized protein [Source:UniProtKB/TrEMBL
CADAFUAG00000159	1987.63	2.54474	0.118812	21.4181	9.05784e-102	1.37928e-99	Itra	147	CADAFUAG00000159	AFUA_3G02830	Afu3G02830	Ankyrin repeat protein [Source:UniProtKB/TrEMBL
CADAFUAG00000747	405.425	5.04032	0.235846	21.3712	2.47614e-101	3.71067e-99	Itra	147	CADAFUAG00000747	AFUA_6G03440	Afu6G03440	Fructosyl amino acid oxidase; putative [Source:UniProtKB/TrEMBL
CADAFUAG00003651	1579.76	-2.60362	0.122344	-21.2811	1.69842e-100	7.33396e-98	Isa	147	CADAFUAG00003651	AFUA_2G00570	Afu2G00570	GNAT family acetyltransferase; putative [Source:UniProtKB/TrEMBL
CADAFUAG00000080	25626.7	-2.14233	0.101075	-21.1955	1.05175e-99	1.5515e-97	Itra	147	CADAFUAG00000080	AFUA_3G00730	Afu3G00730	Putative uncharacterized protein [Source:UniProtKB/TrEMBL
CADAFUAG00002639	2335.27	-3.20676	0.151556	-21.1589	2.28603e-99	3.32037e-97	Itra	147	CADAFUAG00002639	AFUA_5G00790	Afu5G00790	ABC multidrug transporter; putative [Source:UniProtKB/TrEMBL
CADAFUAG00004565	2268.99	2.24018	0.10574	21.1856	1.29607e-99	5.34216e-97	Isa	147	CADAFUAG00004565	AFUA_2G16520	Afu2G16520	Phospholipase D (PLD); putative [Source:UniProtKB/TrEMBL
CADAFUAG00003606	1877.74	-2.63762	0.124826	-21.1303	4.18541e-99	5.98704e-97	Itra	147	CADAFUAG00003606	AFUA_2G05990	Afu2G05990	Putative uncharacterized protein [Source:UniProtKB/TrEMBL
CADAFUAG00006674	2423.98	2.09093	0.100145	20.879	8.31565e-97	1.17176e-94	Itra	147	CADAFUAG00006674	AFUA_5G08210	Afu5G08210	Dolichyl-phosphate beta-glucosyltransferase; putative [Source:UniProtKB/TrEMBL
CADAFUAG00004316	1763.03	2.7047	0.129577	20.8734	9.35039e-97	1.29819e-94	Itra	147	CADAFUAG00004316	AFUA_2G14620	Afu2G14620	Putative uncharacterized protein [Source:UniProtKB/TrEMBL
CADAFUAG00001960	8400.35	-2.50611	0.120252	-20.8405	1.85815e-96	2.54243e-94	Itra	147	CADAFUAG00001960	AFUA_6G06770	Afu6G06770	Enolase [Source:UniProtKB/Swiss-Prot
CADAFUAG00004399	1183.9	-3.325	0.16032	-20.7397	1.51944e-95	2.04928e-93	Itra	147	CADAFUAG00004399	AFUA_2G11300	Afu2G11300	Methylenetetrahydrofolate reductase [Source:UniProtKB/TrEMBL
CADAFUAG00008168	681.534	-4.02621	0.195981	-20.5439	8.72578e-94	1.16028e-91	Itra	147	CADAFUAG00008168	AFUA_4G13570	Afu4G13570	Thiol methyltransferase; putative [Source:UniProtKB/TrEMBL
CADAFUAG00001498	8039.72	-2.43703	0.119088	-20.4642	4.49451e-93	1.77201e-90	Isa	147	CADAFUAG00001498	AFUA_6G00740	Afu6G00740	Putative uncharacterized protein [Source:UniProtKB/TrEMBL
CADAFUAG00000746	378.848	3.875	0.19088	20.3007	1.26831e-91	1.66307e-89	Itra	147	CADAFUAG00000746	AFUA_6G03450	Afu6G03450	Putative uncharacterized protein [Source:UniProtKB/TrEMBL
CADAFUAG00004425	740.646	2.86221	0.141086	20.287	1.67505e-91	2.16633e-89	Itra	147	CADAFUAG00004425	AFUA_2G17800	Afu2G17800	C6 transcription factor; putative [Source:UniProtKB/TrEMBL
CADAFUAG00003802	921.634	-3.22656	0.159111	-20.2788	1.98091e-91	2.52726e-89	Itra	147	CADAFUAG00003802	AFUA_2G05980	Afu2G05980	Putative uncharacterized protein [Source:UniProtKB/TrEMBL
CADAFUAG00001267	19250.4	-2.19031	0.107836	-20.3115	1.01785e-91	3.84576e-89	Isa	147	CADAFUAG00001267	AFUA_4G03010	Afu4G03010	Putative uncharacterized protein [Source:UniProtKB/TrEMBL
CADAFUAG00005208	8144.74	-2.31088	0.1145	-20.1825	1.39608e-90	1.75739e-88	Itra	147	CADAFUAG00005208	AFUA_3G11690	Afu3G11690	Fructose-bisphosphate aldolase; class II [Source:UniProtKB/TrEMBL
CADAFUAG00001679	1991.63	2.21661	0.11021	20.1127	5.71666e-90	7.10144e-88	Itra	147	CADAFUAG00001679	AFUA_6G08270	Afu6G08270	Putative uncharacterized protein [Source:UniProtKB/TrEMBL
CADAFUAG00004914	825.411	2.82831	0.140864	20.0784	1.1409e-89	1.39887e-87	Itra	147	CADAFUAG00004914	AFUA_2G17480	Afu2G17480	Amino acid transporter; putative [Source:UniProtKB/TrEMBL
CADAFUAG00006397	359.217	5.12989	0.255521	20.0762	1.19224e-89	1.44307e-87	Itra	147	CADAFUAG00006397	AFUA_5G08730	Afu5G08730	Putative uncharacterized protein [Source:UniProtKB/TrEMBL
CADAFUAG00000011	1059.58	4.16297	0.20694	20.1168	5.26044e-90	1.90807e-87	Isa	147	CADAFUAG00000011	AFUA_3G01960	Afu3G01960	Putative uncharacterized protein [Source:UniProtKB/TrEMBL
CADAFUAG00002015	10640.9	1.87607	0.0939346	19.9721	9.63936e-89	1.15197e-86	Itra	147	CADAFUAG00002015	AFUA_6G13510	Afu6G13510	Putative uncharacterized protein [Source:UniProtKB/TrEMBL
CADAFUAG00002077	3904.11	2.1189	0.105821	20.0234	3.44234e-89	1.20058e-86	Isa	147	CADAFUAG00002077	AFUA_6G07470	Afu6G07470	Integral membrane protein [Source:UniProtKB/TrEMBL
CADAFUAG00008199	5420.81	-2.04799	0.102656	-19.95	1.49754e-88	5.0295e-86	Isa	147	CADAFUAG00008199	AFUA_4G12710	Afu4G12710	Putative uncharacterized protein [Source:UniProtKB/TrEMBL
CADAFUAG00009161	7382.98	1.82259	0.0919334	19.8251	1.80773e-87	2.13334e-85	Itra	147	CADAFUAG00009161	AFUA_1G07750	Afu1G07750	SWIRM domain protein Fun19; putative [Source:UniProtKB/TrEMBL
CADAFUAG00000091	688.967	-2.78935	0.141023	-19.7794	4.47672e-87	1.44982e-84	Isa	147	CADAFUAG00000091	AFUA_3G03420	Afu3G03420	Nonribosomal peptide synthetase 4 [Source:UniProtKB/Swiss-Prot
CADAFUAG00007752	6016.3	-2.3102	0.117144	-19.7211	1.42169e-86	1.65705e-84	Itra	147	CADAFUAG00007752	AFUA_4G11720	Afu4G11720	Phosphatidyl synthase [Source:UniProtKB/TrEMBL
CADAFUAG00005838	323.193	4.66524	0.236775	19.7033	2.02175e-86	2.32772e-84	Itra	147	CADAFUAG00005838	AFUA_3G09970	Afu3G09970	Vacuolar iron transporter Ccc1; putative [Source:UniProtKB/TrEMBL
CADAFUAG00001500	4241.9	2.83049	0.143679	19.7001	2.15252e-86	2.44843e-84	Itra	147	CADAFUAG00001500	AFUA_6G00430	Afu6G00430	IgE-binding protein [Source:UniProtKB/TrEMBL		DMSO down
CADAFUAG00005762	710.575	3.34611	0.170117	19.6694	3.94376e-86	4.43251e-84	Itra	147	CADAFUAG00005762	AFUA_3G07570	Afu3G07570	Putative uncharacterized protein [Source:UniProtKB/TrEMBL
CADAFUAG00005508	2163.63	3.2599	0.165741	19.6687	3.99898e-86	4.44169e-84	Itra	147	CADAFUAG00005508	AFUA_3G12890	Afu3G12890	C6 transcription factor GliZ-like; putative [Source:UniProtKB/TrEMBL
CADAFUAG00005040	410.902	3.54622	0.180353	19.6627	4.50036e-86	4.94046e-84	Itra	147	CADAFUAG00005040	AFUA_3G12950	Afu3G12950	FAD binding domain protein [Source:UniProtKB/TrEMBL
CADAFUAG00005807	768.399	3.24816	0.165156	19.6672	4.11786e-86	1.28761e-83	Isa	147	CADAFUAG00005807	AFUA_3G10370	Afu3G10370	Putative uncharacterized protein [Source:UniProtKB/TrEMBL
CADAFUAG00007648	1918.11	-2.18497	0.111263	-19.6379	7.33459e-86	2.217e-83	Isa	147	CADAFUAG00007648	AFUA_1G13410	Afu1G13410	Putative uncharacterized protein [Source:UniProtKB/TrEMBL
CADAFUAG00007576	2516.57	2.3142	0.11829	19.5638	3.1463e-85	3.41428e-83	Itra	147	CADAFUAG00007576	AFUA_1G12040	Afu1G12040	Chitin synthase export chaperone [Source:UniProtKB/Swiss-Prot
CADAFUAG00001057	1310.76	-2.63814	0.134958	-19.5478	4.30546e-85	4.61907e-83	Itra	147	CADAFUAG00001057	AFUA_7G00280	Afu7G00280	Putative uncharacterized protein [Source:UniProtKB/TrEMBL
CADAFUAG00001497	1202.36	-2.40372	0.12271	-19.5885	1.93631e-85	5.66401e-83	Isa	147	CADAFUAG00001497	AFUA_6G00730	Afu6G00730	Putative uncharacterized protein [Source:UniProtKB/TrEMBL
CADAFUAG00007185	22095.6	1.79185	0.0918882	19.5004	1.0903e-84	1.15657e-82	Itra	147	CADAFUAG00007185	AFUA_1G13400	Afu1G13400	Putative uncharacterized protein [Source:UniProtKB/TrEMBL
CADAFUAG00000399	4181.14	2.09922	0.10784	19.466	2.13191e-84	2.23637e-82	Itra	147	CADAFUAG00000399	AFUA_3G03330	Afu3G03330	Mitochondrial enoyl reductase; putative [Source:UniProtKB/TrEMBL
CADAFUAG00001028	4542.68	2.09123	0.107565	19.4416	3.4305e-84	3.55905e-82	Itra	147	CADAFUAG00001028	AFUA_7G01490	Afu7G01490	MFS peptide transporter Ptr2; putative [Source:UniProtKB/TrEMBL
CADAFUAG00007972	6904.11	1.79747	0.0925284	19.4262	4.63866e-84	4.76017e-82	Itra	147	CADAFUAG00007972	AFUA_4G06890	Afu4G06890	14-alpha sterol demethylase Cyp51A [Source:UniProtKB/TrEMBL
CADAFUAG00009018	885.201	-2.38935	0.122724	-19.4693	2.00042e-84	5.6687e-82	Isa	147	CADAFUAG00009018	AFUA_1G03660	Afu1G03660	Acid phosphatase; putative [Source:UniProtKB/TrEMBL
CADAFUAG00004521	1755.03	-2.81236	0.145046	-19.3895	9.47413e-84	9.61777e-82	Itra	147	CADAFUAG00004521	AFUA_2G11460	Afu2G11460	C6 finger domain protein; putative [Source:UniProtKB/TrEMBL
CADAFUAG00002343	455.174	5.08767	0.262485	19.3827	1.07965e-83	1.08436e-81	Itra	147	CADAFUAG00002343	AFUA_6G10290	Afu6G10290	GPI-anchored cell wall protein Pst1; putative [Source:UniProtKB/TrEMBL
CADAFUAG00002319	467.314	3.14958	0.162068	19.4337	4.00549e-84	1.10066e-81	Isa	147	CADAFUAG00002319	AFUA_6G11740	Afu6G11740	Nucleoside-diphosphate-sugar epimerase family protein [Source:UniProtKB/TrEMBL
CADAFUAG00005122	467.338	3.46909	0.179044	19.3757	1.23859e-83	1.2309e-81	Itra	147	CADAFUAG00005122	AFUA_3G11500	Afu3G11500	LipA and NB-ARC domain protein [Source:UniProtKB/TrEMBL
CADAFUAG00007929	10036.4	1.7081	0.0883271	19.3383	2.55678e-83	6.81909e-81	Isa	147	CADAFUAG00007929	AFUA_4G06900	Afu4G06900	Asparagine synthetase [Source:UniProtKB/TrEMBL
CADAFUAG00000941	424.205	3.10977	0.160836	19.3351	2.72388e-83	7.05718e-81	Isa	147	CADAFUAG00000941	AFUA_8G02100	Afu8G02100	Beta-glucosidase; putative [Source:UniProtKB/TrEMBL
CADAFUAG00009180	525.576	3.24852	0.168931	19.2298	2.08241e-82	2.04792e-80	Itra	147	CADAFUAG00009180	AFUA_1G03200	Afu1G03200	MFS transporter; putative [Source:UniProtKB/TrEMBL
CADAFUAG00005453	2517.86	1.94517	0.101333	19.1958	4.0162e-82	3.90896e-80	Itra	147	CADAFUAG00005453	AFUA_3G07890	Afu3G07890	Endo alpha-1;4 polygalactosaminidase; putative [Source:UniProtKB/TrEMBL
CADAFUAG00004439	1686.94	2.23112	0.1163	19.1842	5.02019e-82	4.83629e-80	Itra	147	CADAFUAG00004439	AFUA_2G14630	Afu2G14630	Cell wall glycosyl hydrolase YteR; putative [Source:UniProtKB/TrEMBL
CADAFUAG00009497	997.052	2.59853	0.135667	19.1538	9.00502e-82	8.58752e-80	Itra	147	CADAFUAG00009497	AFUA_7G04880	Afu7G04880	Sterol glucosyltransferase; putative [Source:UniProtKB/TrEMBL
CADAFUAG00002647	7298.6	1.77543	0.0927395	19.1442	1.08143e-81	1.02098e-79	Itra	147	CADAFUAG00002647	AFUA_5G00650	Afu5G00650	Putative uncharacterized protein [Source:UniProtKB/TrEMBL
CADAFUAG00000435	516.4	3.27262	0.171786	19.0506	6.50086e-81	6.07669e-79	Itra	147	CADAFUAG00000435	AFUA_6G03090	Afu6G03090	Cytochrome P450 alkane hydroxylase; putative [Source:UniProtKB/TrEMBL
CADAFUAG00005283	1580.08	2.34609	0.123343	19.0208	1.14783e-80	1.06242e-78	Itra	147	CADAFUAG00005283	AFUA_3G12170	Afu3G12170	MFS sugar transporter; putative [Source:UniProtKB/TrEMBL
CADAFUAG00004825	1274.55	2.24712	0.118408	18.9777	2.60634e-80	2.38897e-78	Itra	147	CADAFUAG00004825	AFUA_2G16490	Afu2G16490	Rhomboid family membrane protein [Source:UniProtKB/TrEMBL
CADAFUAG00007302	112274	-1.97425	0.104155	-18.955	4.01875e-80	3.64818e-78	Itra	147	CADAFUAG00007302	AFUA_1G14930	Afu1G14930	Putative uncharacterized protein [Source:UniProtKB/TrEMBL
CADAFUAG00002454	1044.08	3.32799	0.175655	18.9461	4.75152e-80	4.2723e-78	Itra	147	CADAFUAG00002454	AFUA_4G00280	Afu4G00280	Putative uncharacterized protein [Source:UniProtKB/TrEMBL
CADAFUAG00006357	3342.75	2.02203	0.106878	18.9192	7.93189e-80	7.06462e-78	Itra	147	CADAFUAG00006357	AFUA_5G10570	Afu5G10570	Cofilin [Source:UniProtKB/TrEMBL
CADAFUAG00000922	53044.7	1.67949	0.0888126	18.9105	9.34279e-80	8.24348e-78	Itra	147	CADAFUAG00000922	AFUA_8G02440	Afu8G02440	C-4 methyl sterol oxidase; putative [Source:UniProtKB/TrEMBL
CADAFUAG00006957	951.487	-2.24241	0.119303	-18.7959	8.15878e-79	2.05511e-76	Isa	147	CADAFUAG00006957	AFUA_1G16220	Afu1G16220	C6 transcription factor; putative [Source:UniProtKB/TrEMBL
CADAFUAG00002716	995.463	-3.19695	0.170734	-18.7248	3.10866e-78	2.71749e-76	Itra	147	CADAFUAG00002716	AFUA_5G01640	Afu5G01640	Ankyrin repeat protein [Source:UniProtKB/TrEMBL
CADAFUAG00004971	854.761	2.21519	0.118063	18.7627	1.52474e-78	3.73685e-76	Isa	147	CADAFUAG00004971	AFUA_3G11870	Afu3G11870	F-box and WD40 domain protein; putative [Source:UniProtKB/TrEMBL
CADAFUAG00003812	2334.98	-2.67711	0.14329	-18.6831	6.78999e-78	5.88112e-76	Itra	147	CADAFUAG00003812	AFUA_2G04310	Afu2G04310	Argininosuccinate synthase [Source:UniProtKB/TrEMBL
CADAFUAG00003481	6622.22	-1.89462	0.101128	-18.7349	2.57364e-78	6.14153e-76	Isa	147	CADAFUAG00003481	AFUA_2G05910	Afu2G05910	Hexokinase Kxk; putative [Source:UniProtKB/TrEMBL
CADAFUAG00005208	8144.74	-2.00302	0.106984	-18.7226	3.23733e-78	7.52721e-76	Isa	147	CADAFUAG00005208	AFUA_3G11690	Afu3G11690	Fructose-bisphosphate aldolase; class II [Source:UniProtKB/TrEMBL
CADAFUAG00008839	3300.64	-2.23125	0.119776	-18.6286	1.88558e-77	1.61834e-75	Itra	147	CADAFUAG00008839	AFUA_1G00480	Afu1G00480	Glucosamine-6-phosphate deaminase; putative [Source:UniProtKB/TrEMBL
CADAFUAG00007905	535.892	2.93377	0.157632	18.6115	2.5927e-77	2.20519e-75	Itra	147	CADAFUAG00007905	AFUA_4G14085	Afu4G14085	Cell surface protein; putative [Source:UniProtKB/TrEMBL
CADAFUAG00000519	449.151	3.95456	0.212917	18.5732	5.29158e-77	1.1996e-74	Isa	147	CADAFUAG00000519	AFUA_6G03680	Afu6G03680	Putative uncharacterized protein [Source:UniProtKB/TrEMBL
CADAFUAG00007560	1498.32	2.58108	0.139241	18.5367	1.0441e-76	2.30923e-74	Isa	147	CADAFUAG00007560	AFUA_1G12410	Afu1G12410	Salicylate hydroxylase; putative [Source:UniProtKB/TrEMBL
CADAFUAG00002936	1302.99	2.76367	0.149715	18.4595	4.3716e-76	3.68503e-74	Itra	147	CADAFUAG00002936	AFUA_5G02650	Afu5G02650	Putative uncharacterized protein [Source:UniProtKB/TrEMBL
CADAFUAG00000447	4184.14	-2.45886	0.133244	-18.4539	4.85384e-76	4.05532e-74	Itra	147	CADAFUAG00000447	AFUA_6G03690	Afu6G03690	Sodium P-type ATPase; putative [Source:UniProtKB/TrEMBL
CADAFUAG00001182	2917.11	2.09278	0.113498	18.4389	6.40695e-76	5.30596e-74	Itra	147	CADAFUAG00001182	AFUA_7G00370	Afu7G00370	Putative uncharacterized protein [Source:UniProtKB/TrEMBL
CADAFUAG00008149	792.617	-3.18175	0.173253	-18.3648	2.51327e-75	2.06329e-73	Itra	147	CADAFUAG00008149	AFUA_4G13510	Afu4G13510	Isocitrate lyase [Source:UniProtKB/Swiss-Prot
CADAFUAG00007133	106097	1.77953	0.0970167	18.3425	3.79056e-75	3.08506e-73	Itra	147	CADAFUAG00007133	AFUA_1G11220	Afu1G11220	GPI anchored protein; putative [Source:UniProtKB/TrEMBL
CADAFUAG00002463	784.355	-3.03322	0.165534	-18.3238	5.34225e-75	1.15342e-72	Isa	147	CADAFUAG00002463	AFUA_4G00450	Afu4G00450	Putative uncharacterized protein [Source:UniProtKB/TrEMBL
CADAFUAG00001986	1679.72	2.49416	0.136632	18.2545	1.90375e-74	1.52388e-72	Itra	147	CADAFUAG00001986	AFUA_6G14060	Afu6G14060	Putative uncharacterized protein [Source:UniProtKB/TrEMBL
CADAFUAG00004625	373.144	5.71594	0.313125	18.2545	1.90465e-74	1.52388e-72	Itra	147	CADAFUAG00004625	AFUA_2G17810	Afu2G17810	RTA1 domain protein; putative [Source:UniProtKB/TrEMBL
CADAFUAG00001902	527.98	4.13438	0.226038	18.2906	9.82859e-75	2.07269e-72	Isa	147	CADAFUAG00001902	AFUA_6G14140	Afu6G14140	RTA1 domain protein; putative [Source:UniProtKB/TrEMBL
CADAFUAG00000861	572.771	3.93281	0.216874	18.1341	1.71445e-73	1.36018e-71	Itra	147	CADAFUAG00000861	AFUA_8G02050	Afu8G02050	Putative uncharacterized protein [Source:UniProtKB/TrEMBL
CADAFUAG00003980	3543.48	1.73508	0.095756	18.1198	2.2232e-73	1.74911e-71	Itra	147	CADAFUAG00003980	AFUA_2G13680	Afu2G13680	Calcium/calmodulin-dependent protein kinase; putative [Source:UniProtKB/TrEMBL
CADAFUAG00000880	546.411	-3.64822	0.20141	-18.1133	2.50068e-73	1.95115e-71	Itra	147	CADAFUAG00000880	AFUA_8G01390	Afu8G01390	Glycosyl hydrolase; putative [Source:UniProtKB/TrEMBL
CADAFUAG00000519	449.151	4.93473	0.272579	18.1039	2.97052e-73	2.29875e-71	Itra	147	CADAFUAG00000519	AFUA_6G03680	Afu6G03680	Putative uncharacterized protein [Source:UniProtKB/TrEMBL
CADAFUAG00003762	2337.08	-1.92181	0.10594	-18.1407	1.52202e-73	3.13674e-71	Isa	147	CADAFUAG00003762	AFUA_2G05150	Afu2G05150	Cell wall galactomannoprotein Mp2/allergen F17-like [Source:UniProtKB/TrEMBL
CADAFUAG00001217	3636.69	2.4852	0.137812	18.0332	1.06828e-72	2.1527e-70	Isa	147	CADAFUAG00001217	AFUA_7G02010	Afu7G02010	Indoleamine 2;3-dioxygenase family protein [Source:UniProtKB/TrEMBL
CADAFUAG00007406	557.483	-2.70552	0.150127	-18.0215	1.32036e-72	2.60283e-70	Isa	147	CADAFUAG00007406	AFUA_1G17270	Afu1G17270	FRE family ferric-chelate reductase; putative [Source:UniProtKB/TrEMBL
CADAFUAG00000189	292.177	-4.87451	0.270773	-18.0022	1.87099e-72	3.60982e-70	Isa	147	CADAFUAG00000189	AFUA_3G03010	Afu3G03010	Phosphate-repressible Na+/phosphate cotransporter Pho89; putative [Source:UniProtKB/TrEMBL
CADAFUAG00006338	4778.2	1.84063	0.102667	17.9281	7.11742e-72	1.3446e-69	Isa	147	CADAFUAG00006338	AFUA_5G13070	Afu5G13070	Putative uncharacterized protein [Source:UniProtKB/TrEMBL
CADAFUAG00005342	375.217	-2.97643	0.166501	-17.8764	1.80225e-71	3.33526e-69	Isa	147	CADAFUAG00005342	AFUA_3G15055	Afu3G15055	Putative uncharacterized protein [Source:UniProtKB/TrEMBL
CADAFUAG00006980	5229.19	1.91403	0.10722	17.8515	2.81601e-71	5.10711e-69	Isa	147	CADAFUAG00006980	AFUA_1G17070	Afu1G17070	FYVE domain protein; putative [Source:UniProtKB/TrEMBL
CADAFUAG00005839	56084.4	-1.86081	0.104499	-17.807	6.23431e-71	1.10848e-68	Isa	147	CADAFUAG00005839	AFUA_3G14665	Afu3G14665	Putative uncharacterized protein [Source:UniProtKB/TrEMBL
CADAFUAG00004336	775.562	-2.82709	0.159189	-17.7594	1.45838e-70	1.1194e-68	Itra	147	CADAFUAG00004336	AFUA_2G13630	Afu2G13630	Aromatic aminotransferase Aro8; putative [Source:UniProtKB/TrEMBL
CADAFUAG00000339	896.361	2.38655	0.134681	17.7201	2.93328e-70	2.23331e-68	Itra	147	CADAFUAG00000339	AFUA_3G01850	Afu3G01850	Porphyromonas-type peptidyl-arginine deiminase superfamily [Source:UniProtKB/TrEMBL
CADAFUAG00005444	3398.97	1.79302	0.101273	17.7049	3.84305e-70	2.90258e-68	Itra	147	CADAFUAG00005444	AFUA_3G13010	Afu3G13010	Zn-dependent hydrolase/oxidoreductase family protein; putative [Source:UniProtKB/TrEMBL
CADAFUAG00002748	1861.6	1.86817	0.105896	17.6415	1.18183e-69	8.8553e-68	Itra	147	CADAFUAG00002748	AFUA_5G01750	Afu5G01750	MATH and UCH domain protein; putaitve [Source:UniProtKB/TrEMBL
CADAFUAG00008549	450.593	3.17822	0.180848	17.5739	3.903e-69	2.90144e-67	Itra	147	CADAFUAG00008549	AFUA_4G14175	Afu4G14175	Putative uncharacterized protein [Source:UniProtKB/TrEMBL
CADAFUAG00002637	1903.77	2.00922	0.114477	17.5513	5.80993e-69	1.01316e-66	Isa	147	CADAFUAG00002637	AFUA_5G02330	Afu5G02330	Ribonuclease mitogillin Aspf1 [Source:UniProtKB/Swiss-Prot
CADAFUAG00008768	560.491	-3.14909	0.180157	-17.4797	2.04739e-68	1.51011e-66	Itra	147	CADAFUAG00008768	AFUA_1G06040	Afu1G06040	O-acyltransferase [Source:UniProtKB/TrEMBL
CADAFUAG00008147	1469.2	2.13291	0.121789	17.5132	1.13645e-68	1.9444e-66	Isa	147	CADAFUAG00008147	AFUA_4G14640	Afu4G14640	Low affinity iron transporter; putative [Source:UniProtKB/TrEMBL
CADAFUAG00005458	1007.22	2.33394	0.133732	17.4524	3.30284e-68	2.41722e-66	Itra	147	CADAFUAG00005458	AFUA_3G10600	Afu3G10600	Golgi apparatus membrane protein tvp18 [Source:UniProtKB/Swiss-Prot
CADAFUAG00000202	619.969	2.68656	0.154034	17.4413	4.0072e-68	2.91015e-66	Itra	147	CADAFUAG00000202	AFUA_3G01670	Afu3G01670	MFS hexose transporter; putative [Source:UniProtKB/TrEMBL
CADAFUAG00002851	9607.03	-1.84933	0.105887	-17.4651	2.6436e-68	4.43929e-66	Isa	147	CADAFUAG00002851	AFUA_5G01620	Afu5G01620	Extracellular proline-rich protein [Source:UniProtKB/TrEMBL		DMSO up
CADAFUAG00009497	997.052	1.95921	0.112527	17.4109	6.81667e-68	1.12388e-65	Isa	147	CADAFUAG00009497	AFUA_7G04880	Afu7G04880	Sterol glucosyltransferase; putative [Source:UniProtKB/TrEMBL
CADAFUAG00009452	1333.33	1.87926	0.107968	17.4057	7.46912e-68	1.20946e-65	Isa	147	CADAFUAG00009452	AFUA_7G04870	Afu7G04870	Glutamine-serine-proline rich protein; putative [Source:UniProtKB/TrEMBL
CADAFUAG00003083	3103.33	-2.09524	0.120836	-17.3396	2.36435e-67	1.70396e-65	Itra	147	CADAFUAG00003083	AFUA_8G04070	Afu8G04070	Glucosamine-6-phosphate deaminase; putative [Source:UniProtKB/TrEMBL
CADAFUAG00006980	5229.19	1.91556	0.110632	17.3148	3.63968e-67	2.6032e-65	Itra	147	CADAFUAG00006980	AFUA_1G17070	Afu1G17070	FYVE domain protein; putative [Source:UniProtKB/TrEMBL
CADAFUAG00000435	516.4	2.76639	0.159567	17.3369	2.4784e-67	3.94283e-65	Isa	147	CADAFUAG00000435	AFUA_6G03090	Afu6G03090	Cytochrome P450 alkane hydroxylase; putative [Source:UniProtKB/TrEMBL
CADAFUAG00007894	2148.07	-1.88899	0.108999	-17.3303	2.77749e-67	4.34247e-65	Isa	147	CADAFUAG00007894	AFUA_4G09660	Afu4G09660	Secretory component protein shr3; putative [Source:UniProtKB/TrEMBL
CADAFUAG00000001	4698.13	2.0386	0.117706	17.3195	3.35472e-67	5.15603e-65	Isa	147	CADAFUAG00000001	AFUA_3G01196	Afu3G01196	Putative uncharacterized protein [Source:UniProtKB/TrEMBL
[truncated: 7,791 more rows]

## Sheet: DEGs 147 ICZ
	baseMean	log2FoldChange	lfcSE	stat	pvalue	padj	Treatment	Isolate
[truncated: 3,102 more rows]

[truncated: 4 more sheets: DEGs 147 ISA, DEGs 162 ICZ, DEGs 162 ISA, DEGs 181 ISA]
