# Supplementary material for: The Transcriptome Response to Azole Compounds in Aspergillus fumigatus Shows Differential Gene Expression across Pathways Essential for Azole Resistance and Cell Survival
Source: J Fungi (Basel). 2023 Jul 30;9(8):807. doi: 10.3390/jof9080807 (PMC10455693; doi:10.3390/jof9080807)
Supplement: Supplementary file 1 [file jof-09-00807-s001.zip › Table S3 All DEGs after DMSO treatment.xlsx]

## Sheet: ResultsDMSO_0vsD
	baseMean	log2FoldChange	lfcSE	stat	pvalue	padj
CADAFUAG00000001	1929.48	0.0227361	0.326084	0.0697248	0.944413	0.999997	AFUA_3G01196	Afu3G01196	Putative uncharacterized protein [Source:UniProtKB/TrEMBL
CADAFUAG00000002	215.132	0.43953	0.400437	1.09763	0.272368	0.999997	AFUA_3G04060	Afu3G04060	SNF7 family protein Fti1/Did2; putative [Source:UniProtKB/TrEMBL
CADAFUAG00000003	182.615	0.295301	0.434302	0.679944	0.49654	0.999997	AFUA_3G03160	Afu3G03160	Glycerol dehydrogenase (GCY1); putative [Source:UniProtKB/TrEMBL
CADAFUAG00000004	0	NA	NA	NA	NA	NA	AFUA_3G02630	Afu3G02630	Putative uncharacterized protein [Source:UniProtKB/TrEMBL
CADAFUAG00000005	8.22261	-0.883228	1.44018	-0.613278	0.539693	0.999997	AFUA_3G01040	Afu3G01040	Putative uncharacterized protein [Source:UniProtKB/TrEMBL
CADAFUAG00000006	0	NA	NA	NA	NA	NA	AFUA_3G02580	Afu3G02580	Short-chain dehydrogenase/reductase family protein; putative [Source:UniProtKB/TrEMBL
CADAFUAG00000007	9.55129	0.0197045	1.35846	0.014505	0.988427	0.999997	AFUA_3G01010	Afu3G01010	Alpha-ketoglutarate-dependent taurine dioxygenase [Source:UniProtKB/TrEMBL
CADAFUAG00000008	17.8792	0.640217	1.04349	0.613536	0.539522	0.999997	AFUA_3G02060	Afu3G02060	MFS multidrug transporter; putative [Source:UniProtKB/TrEMBL
CADAFUAG00000009	204.961	-0.251698	0.40109	-0.627534	0.530309	0.999997	AFUA_3G00140	Afu3G00140	Putative uncharacterized protein [Source:UniProtKB/TrEMBL
CADAFUAG00000010	1652.26	0.632748	0.323711	1.95467	0.050622	0.999997	AFUA_3G03060	Afu3G03060	Cell wall protein PhiA [Source:UniProtKB/TrEMBL
CADAFUAG00000011	4.54313	-0.0824282	1.94197	-0.0424457	0.966143	0.999997	AFUA_3G01960	Afu3G01960	Putative uncharacterized protein [Source:UniProtKB/TrEMBL
CADAFUAG00000012	7.99998	-0.37949	1.46512	-0.259016	0.795623	0.999997	AFUA_3G03960	Afu3G03960	Putative uncharacterized protein [Source:UniProtKB/TrEMBL
CADAFUAG00000013	10.0421	-0.840815	1.33739	-0.628697	0.529547	0.999997	AFUA_3G01300	Afu3G01300	Putative uncharacterized protein [Source:UniProtKB/TrEMBL
CADAFUAG00000014	0.282951	1.04089	6.11615	0.170187	0.864863	NA	AFUA_3G01730	Afu3G01730	Putative uncharacterized protein [Source:UniProtKB/TrEMBL
CADAFUAG00000015	567.178	-0.350939	0.345963	-1.01438	0.3104	0.999997	AFUA_3G00540	Afu3G00540	MFS peptide transporter; putative [Source:UniProtKB/TrEMBL
CADAFUAG00000016	18221.3	-0.24186	0.320884	-0.753732	0.45101	0.999997	AFUA_3G01900	Afu3G01900	Putative uncharacterized protein [Source:UniProtKB/TrEMBL
CADAFUAG00000017	1.57159	0.58612	3.27381	0.179033	0.857912	0.999997	AFUA_3G01030	Afu3G01030	RTA1 domain protein; putative [Source:UniProtKB/TrEMBL
CADAFUAG00000018	1.90006	0.935453	3.02819	0.308915	0.757386	0.999997	AFUA_3G01540	Afu3G01540	MFS monocarboxylate transporter; putative [Source:UniProtKB/TrEMBL
CADAFUAG00000019	7.58543	0.13944	1.52224	0.0916013	0.927015	0.999997	AFUA_3G00430	Afu3G00430	High-affinity glucose transporter; putative [Source:UniProtKB/TrEMBL
CADAFUAG00000020	26.6227	-0.323888	0.843529	-0.383968	0.701002	0.999997	AFUA_3G00100	Afu3G00100	Flavin-containing amine oxidase; putative [Source:UniProtKB/TrEMBL
CADAFUAG00000021	310.555	0.173363	0.367364	0.471912	0.63699	0.999997	AFUA_3G04160	Afu3G04160	Ser/Thr protein phosphatase family [Source:UniProtKB/TrEMBL
CADAFUAG00000022	0	NA	NA	NA	NA	NA	AFUA_3G03690	Afu3G03690	Putative uncharacterized protein [Source:UniProtKB/TrEMBL
CADAFUAG00000023	2.07717	-1.39603	2.7653	-0.504839	0.613672	0.999997	AFUA_3G02930	Afu3G02930	Extracellular soluble lytic transglycosylase; putative [Source:UniProtKB/TrEMBL
CADAFUAG00000024	80.6392	0.234343	0.54187	0.432471	0.665399	0.999997	AFUA_3G02320	Afu3G02320	C2H2 finger domain protein (Kin17); putative [Source:UniProtKB/TrEMBL
CADAFUAG00000025	7.26244	-0.939526	1.5355	-0.61187	0.540624	0.999997	AFUA_3G01170	Afu3G01170	Cystathionine beta-lyase [Source:UniProtKB/TrEMBL
CADAFUAG00000026	55.3677	0.0340866	0.656305	0.0519371	0.958579	0.999997	AFUA_3G03650	Afu3G03650	GNAT family acetyltransferase; putative [Source:UniProtKB/TrEMBL
CADAFUAG00000027	23576.5	-0.627373	0.337319	-1.85988	0.0629022	0.999997	AFUA_3G00500	Afu3G00500	Integral membrane protein [Source:UniProtKB/TrEMBL
CADAFUAG00000028	26.971	0.0761996	0.845389	0.0901356	0.928179	0.999997	AFUA_3G03510	Afu3G03510	4-hydroxyphenylpyruvate dioxygenase; putative [Source:UniProtKB/TrEMBL
CADAFUAG00000029	105.239	-0.663339	0.489547	-1.35501	0.175416	0.999997	AFUA_3G03290	Afu3G03290	Putative uncharacterized protein [Source:UniProtKB/TrEMBL
CADAFUAG00000030	2.25428	-3.7148	2.99984	-1.23833	0.215592	0.999997	AFUA_3G01700	Afu3G01700	MFS alpha-glucoside transporter; putative [Source:UniProtKB/TrEMBL
CADAFUAG00000031	74.5173	-0.461114	0.558407	-0.825766	0.408937	0.999997	AFUA_3G00870	Afu3G00870	GNAT family N-acetyltransferase; putative [Source:UniProtKB/TrEMBL
CADAFUAG00000032	24.312	0.638937	0.90456	0.706351	0.47997	0.999997	AFUA_3G00360	Afu3G00360	Riboflavin biosynthesis protein Rib7; putative [Source:UniProtKB/TrEMBL
CADAFUAG00000033	74.8188	-0.255399	0.567374	-0.450142	0.652608	0.999997	AFUA_3G00280	Afu3G00280	Metallo-beta-lactamase domain protein; putative [Source:UniProtKB/TrEMBL
CADAFUAG00000034	0.282951	1.04089	6.11615	0.170187	0.864863	NA	AFUA_3G00550	Afu3G00550	Putative uncharacterized protein [Source:UniProtKB/TrEMBL
CADAFUAG00000035	3311.56	-0.408894	0.297907	-1.37256	0.16989	0.999997	AFUA_3G03610	Afu3G03610	Putative uncharacterized protein [Source:UniProtKB/TrEMBL
CADAFUAG00000036	0.394266	-2.81358	5.94816	-0.473017	0.636201	NA	AFUA_3G00610	Afu3G00610	Glucoamylase [Source:UniProtKB/TrEMBL
CADAFUAG00000037	0.98541	2.75353	4.75495	0.579088	0.56253	NA	AFUA_3G02420	Afu3G02420	ThiJ/PfpI family transcriptional regulator; putative [Source:UniProtKB/TrEMBL
CADAFUAG00000038	517.097	0.137323	0.34631	0.396533	0.691712	0.999997	AFUA_3G04150	Afu3G04150	Mitochondrial enoyl reductase; putative [Source:UniProtKB/TrEMBL
CADAFUAG00000039	19135.2	0.035287	0.314581	0.112172	0.910687	0.999997	AFUA_3G03720	Afu3G03720	Putative uncharacterized protein [Source:UniProtKB/TrEMBL
CADAFUAG00000040	47.905	-0.773697	0.653731	-1.18351	0.236607	0.999997	AFUA_3G02530	Afu3G02530	PKS-like enzyme; putative [Source:UniProtKB/TrEMBL
CADAFUAG00000041	6404.12	0.241364	0.335285	0.719877	0.471601	0.999997	AFUA_3G02280	Afu3G02280	Alpha;alpha-trehalose glucohydrolase TreA/Ath1 [Source:UniProtKB/TrEMBL
CADAFUAG00000042	12.3166	-1.44651	1.19664	-1.20881	0.226737	0.999997	AFUA_3G01610	Afu3G01610	Putative uncharacterized protein [Source:UniProtKB/TrEMBL
CADAFUAG00000043	13.0947	-1.4091	1.1959	-1.17828	0.238684	0.999997	AFUA_3G02990	Afu3G02990	Putative uncharacterized protein [Source:UniProtKB/TrEMBL
CADAFUAG00000044	140.776	0.11202	0.455581	0.245884	0.805772	0.999997	AFUA_3G01760	Afu3G01760	Alpha/beta superfamily hydrolase; putative [Source:UniProtKB/TrEMBL
CADAFUAG00000045	16.5916	-0.853598	1.04542	-0.816512	0.414207	0.999997	AFUA_3G03980	Afu3G03980	Cytochrome P450 monooxygenase; putative [Source:UniProtKB/TrEMBL
CADAFUAG00000046	0.677217	-1.40004	4.95396	-0.282611	0.777475	NA	AFUA_3G03890	Afu3G03890	Secretory lipase; putative [Source:UniProtKB/TrEMBL
CADAFUAG00000047	14.2606	0.818686	1.16662	0.701757	0.48283	0.999997	AFUA_3G03020	Afu3G03020	Phosphoglucomutase; putative [Source:UniProtKB/TrEMBL
CADAFUAG00000048	1.37968	0.305379	3.72257	0.0820346	0.934619	NA	AFUA_3G00980	Afu3G00980	MFS transporter Liz1/Seo1; putative [Source:UniProtKB/TrEMBL
CADAFUAG00000049	785.714	-0.0929355	0.325005	-0.285951	0.774916	0.999997	AFUA_3G00240	Afu3G00240	TPR domain protein [Source:UniProtKB/TrEMBL
CADAFUAG00000050	5.62505	-0.959092	1.78635	-0.536899	0.591337	0.999997	AFUA_3G03880	Afu3G03880	Spherulin; putative [Source:UniProtKB/TrEMBL
CADAFUAG00000051	1087.87	-0.227767	0.307095	-0.741681	0.458281	0.999997	AFUA_3G02670	Afu3G02670	NRPS-like enzyme; putative [Source:UniProtKB/TrEMBL
CADAFUAG00000052	70.7929	-0.554127	0.562173	-0.985687	0.324287	0.999997	AFUA_3G01930	Afu3G01930	Putative uncharacterized protein [Source:UniProtKB/TrEMBL
CADAFUAG00000053	6910.16	-0.146505	0.306475	-0.478034	0.632626	0.999997	AFUA_3G01590	Afu3G01590	Putative uncharacterized protein [Source:UniProtKB/TrEMBL
CADAFUAG00000054	5159.3	0.0387533	0.310761	0.124705	0.900757	0.999997	AFUA_3G04220	Afu3G04220	Fatty acid synthase beta subunit; putative [Source:UniProtKB/TrEMBL
CADAFUAG00000055	295.459	-0.561275	0.387373	-1.44893	0.147358	0.999997	AFUA_3G00175	Afu3G00175	Putative uncharacterized protein [Source:UniProtKB/TrEMBL
CADAFUAG00000056	0	NA	NA	NA	NA	NA	AFUA_3G02150	Afu3G02150	MFS monocarboxylate transporter; putative [Source:UniProtKB/TrEMBL
CADAFUAG00000057	1900.33	-0.356454	0.314488	-1.13344	0.257029	0.999997	AFUA_3G03410	Afu3G03410	Enoyl-CoA hydratase/isomerase family protein [Source:UniProtKB/TrEMBL
CADAFUAG00000058	3.01706	-0.36855	2.32179	-0.158735	0.873878	0.999997	AFUA_3G03220	Afu3G03220	Putative uncharacterized protein [Source:UniProtKB/TrEMBL
CADAFUAG00000059	5.44298	-1.03452	1.75883	-0.588187	0.556407	0.999997	AFUA_3G03810	Afu3G03810	Putative uncharacterized protein [Source:UniProtKB/TrEMBL
CADAFUAG00000060	303.82	-0.206992	0.365895	-0.565713	0.571589	0.999997	AFUA_3G03130	Afu3G03130	Putative uncharacterized protein [Source:UniProtKB/TrEMBL
CADAFUAG00000061	8.81375	-0.43548	1.41044	-0.308755	0.757508	0.999997	AFUA_3G02850	Afu3G02850	Putative uncharacterized protein [Source:UniProtKB/TrEMBL
CADAFUAG00000062	10.3656	-1.18664	1.29152	-0.918789	0.358206	0.999997	AFUA_3G03480	Afu3G03480	Cytochrome P450 monooxygenase; putative [Source:UniProtKB/TrEMBL
CADAFUAG00000063	2339.35	-0.198569	0.345068	-0.57545	0.564987	0.999997	AFUA_3G03640	Afu3G03640	MFS siderochrome iron transporter MirB [Source:UniProtKB/TrEMBL
CADAFUAG00000064	1318.9	-0.418875	0.329591	-1.27089	0.203767	0.999997	AFUA_3G03560	Afu3G03560	Pyridine nucleotide-disulfide oxidoreductase; putative [Source:UniProtKB/TrEMBL
CADAFUAG00000065	30.3839	-0.889924	0.811992	-1.09598	0.273089	0.999997	AFUA_3G01990	Afu3G01990	DUF636 domain protein [Source:UniProtKB/TrEMBL
CADAFUAG00000066	85.6703	-0.417318	0.524441	-0.795738	0.426184	0.999997	AFUA_3G01860	Afu3G01860	Putative uncharacterized protein [Source:UniProtKB/TrEMBL
CADAFUAG00000067	7.83382	-1.61604	1.48959	-1.08489	0.27797	0.999997	AFUA_3G00560	Afu3G00560	Putative uncharacterized protein [Source:UniProtKB/TrEMBL
CADAFUAG00000068	3.52264	-1.35278	2.15823	-0.626802	0.530789	0.999997	AFUA_3G00580	Afu3G00580	Putative uncharacterized protein [Source:UniProtKB/TrEMBL
CADAFUAG00000069	15.7072	-0.431814	1.10972	-0.38912	0.697188	0.999997	AFUA_3G02680	Afu3G02680	C6 finger domain protein; putative [Source:UniProtKB/TrEMBL
CADAFUAG00000070	0.394266	-2.81358	5.94816	-0.473017	0.636201	NA	AFUA_3G03780	Afu3G03780	Putative uncharacterized protein [Source:UniProtKB/TrEMBL
CADAFUAG00000071	24.3443	-0.735173	0.890016	-0.826023	0.408791	0.999997	AFUA_3G02230	Afu3G02230	Putative uncharacterized protein [Source:UniProtKB/TrEMBL
CADAFUAG00000072	7.25696	0.0466791	1.54804	0.0301536	0.975945	0.999997	AFUA_3G01260	Afu3G01260	Acetyltransferase; GNAT family family [Source:UniProtKB/TrEMBL
CADAFUAG00000073	0.565902	1.97486	5.91222	0.33403	0.738357	NA	AFUA_3G03050	Afu3G03050	RNAse III; putative [Source:UniProtKB/TrEMBL
CADAFUAG00000074	31.287	-0.354109	0.811739	-0.436234	0.662667	0.999997	AFUA_3G01420	Afu3G01420	DUF341 family oxidoreductase; putative [Source:UniProtKB/TrEMBL
CADAFUAG00000075	2.16821	-1.28628	2.94814	-0.436301	0.662619	0.999997	AFUA_3G00400	Afu3G00400	Putative uncharacterized protein [Source:UniProtKB/TrEMBL
CADAFUAG00000076	0	NA	NA	NA	NA	NA	AFUA_3G00600	Afu3G00600	Putative uncharacterized protein [Source:UniProtKB/TrEMBL
CADAFUAG00000077	6.5397	-0.901537	1.60753	-0.56082	0.574921	0.999997	AFUA_3G00770	Afu3G00770	Putative uncharacterized protein [Source:UniProtKB/TrEMBL
CADAFUAG00000078	0.32847	1.14964	6.11021	0.18815	0.850759	NA	AFUA_3G00950	Afu3G00950	Ankyrin repeat protein [Source:UniProtKB/TrEMBL
CADAFUAG00000079	1152.65	-0.302324	0.305124	-0.990823	0.321772	0.999997	AFUA_3G03280	Afu3G03280	FAD binding monooxygenase; putative [Source:UniProtKB/TrEMBL
CADAFUAG00000080	15875.1	0.474765	0.302249	1.57078	0.116235	0.999997	AFUA_3G00730	Afu3G00730	Putative uncharacterized protein [Source:UniProtKB/TrEMBL
CADAFUAG00000081	10.7544	-0.649076	1.27413	-0.509425	0.610454	0.999997	AFUA_3G04020	Afu3G04020	Conserved mitochondrial protein [Source:UniProtKB/TrEMBL
CADAFUAG00000082	0.32847	1.14964	6.11021	0.18815	0.850759	NA	AFUA_3G01720	Afu3G01720	Putative uncharacterized protein [Source:UniProtKB/TrEMBL
CADAFUAG00000083	379.168	-0.297898	0.358795	-0.830274	0.406384	0.999997	AFUA_3G01650	Afu3G01650	WSC domain protein; putative [Source:UniProtKB/TrEMBL
CADAFUAG00000084	9.92528	0.0992753	1.34257	0.0739442	0.941055	0.999997	AFUA_3G01120	Afu3G01120	MFS multidrug transporter; putative [Source:UniProtKB/TrEMBL
CADAFUAG00000085	66.6232	-0.395849	0.583609	-0.678278	0.497595	0.999997	AFUA_3G04190	Afu3G04190	Putative uncharacterized protein [Source:UniProtKB/TrEMBL
CADAFUAG00000086	97.913	-0.696598	0.551472	-1.26316	0.206531	0.999997	AFUA_3G03680	Afu3G03680
CADAFUAG00000087	19.1229	-0.109237	0.98235	-0.1112	0.911458	0.999997	AFUA_3G01790	Afu3G01790	Isoflavone reductase family protein [Source:UniProtKB/TrEMBL
CADAFUAG00000088	2844	-0.321821	0.338579	-0.950506	0.341855	0.999997	AFUA_3G00200	Afu3G00200	Hexose transporter protein [Source:UniProtKB/TrEMBL
CADAFUAG00000089	223.085	0.432905	0.407054	1.06351	0.287551	0.999997	AFUA_3G01940	Afu3G01940	MFS multidrug transporter; putative [Source:UniProtKB/TrEMBL
CADAFUAG00000090	119.511	-0.548648	0.470477	-1.16615	0.243553	0.999997	AFUA_3G00510	Afu3G00510	GPI anchored cell wall protein; putative [Source:UniProtKB/TrEMBL
CADAFUAG00000091	364.401	0.070443	0.378853	0.185938	0.852494	0.999997	AFUA_3G03420	Afu3G03420	Nonribosomal peptide synthetase 4 [Source:UniProtKB/Swiss-Prot
CADAFUAG00000092	19.8149	0.10119	0.979308	0.103328	0.917702	0.999997	AFUA_3G01530	Afu3G01530	Phosphatidylglycerol specific phospholipase; putative [Source:UniProtKB/TrEMBL
CADAFUAG00000093	0	NA	NA	NA	NA	NA	AFUA_3G04100	Afu3G04100	Putative uncharacterized protein [Source:UniProtKB/TrEMBL
CADAFUAG00000094	0.960167	-0.459253	4.26691	-0.107631	0.914288	NA	AFUA_3G02890	Afu3G02890	MFS sugar transporter; putative [Source:UniProtKB/TrEMBL
CADAFUAG00000095	0	NA	NA	NA	NA	NA	AFUA_3G02620	Afu3G02620	Phenol hydroxylase; putative [Source:UniProtKB/TrEMBL
CADAFUAG00000096	39.6698	0.30657	0.729762	0.420096	0.674416	0.999997	AFUA_3G02800	Afu3G02800	Lipase/esterase; putative [Source:UniProtKB/TrEMBL
CADAFUAG00000097	30.6669	-0.863889	0.805455	-1.07255	0.283474	0.999997	AFUA_3G02220	Afu3G02220	DUF427 domain protein [Source:UniProtKB/TrEMBL
CADAFUAG00000098	3.36581	-0.812299	2.20357	-0.368629	0.712405	0.999997	AFUA_3G01450	Afu3G01450	3-methyl-2-oxobutanoate dehydrogenase; putative [Source:UniProtKB/TrEMBL
CADAFUAG00000099	15.3485	-0.929386	1.07719	-0.862786	0.388255	0.999997	AFUA_3G01210	Afu3G01210	ThiJ/PfpI family protein [Source:UniProtKB/TrEMBL
CADAFUAG00000100	0.939891	2.69082	4.44503	0.605353	0.544944	NA	AFUA_3G02710	Afu3G02710	Zinc-binding oxidoreductase; putative [Source:UniProtKB/TrEMBL
CADAFUAG00000101	2.68311	4.21264	3.12566	1.34776	0.177735	0.999997	AFUA_3G03200	Afu3G03200	Cysteine hydrolase family protein [Source:UniProtKB/TrEMBL
CADAFUAG00000102	8.33828	-0.27119	1.5678	-0.172975	0.862671	0.999997	AFUA_3G02740	Afu3G02740	Calcium/calmodulin dependent protein kinase; putative [Source:UniProtKB/TrEMBL
CADAFUAG00000103	405.139	-0.053818	0.3558	-0.151259	0.879771	0.999997	AFUA_3G04230	Afu3G04230	Transcription initiation factor IIF subunit alpha; putative [Source:UniProtKB/TrEMBL
CADAFUAG00000104	6115.61	-0.387348	0.318183	-1.21737	0.223462	0.999997	AFUA_3G03350	Afu3G03350	Nonribosomal peptide synthetase 3 [Source:UniProtKB/Swiss-Prot
CADAFUAG00000105	14719.5	-0.341008	0.345339	-0.987458	0.323418	0.999997	AFUA_3G00180	Afu3G00180	Short chain dehydrogenase (AtsC); putative [Source:UniProtKB/TrEMBL
CADAFUAG00000106	23.8025	-0.0934961	0.889779	-0.105078	0.916314	0.999997	AFUA_3G02370	Afu3G02370	Short-chain dehydrogenase/reductase; putative [Source:UniProtKB/TrEMBL
CADAFUAG00000107	43.0329	-0.598713	0.687823	-0.870445	0.384057	0.999997	AFUA_3G02090	Afu3G02090	Probable exo-1;4-beta-xylosidase bxlB [Source:UniProtKB/Swiss-Prot
CADAFUAG00000108	143.729	-0.0601021	0.458082	-0.131204	0.895614	0.999997	AFUA_3G03500	Afu3G03500	MFS multidrug transporter; putative [Source:UniProtKB/TrEMBL
CADAFUAG00000109	335.125	0.222312	0.360241	0.617121	0.537155	0.999997	AFUA_3G00230	Afu3G00230	Beta-glucosidase; putative [Source:UniProtKB/TrEMBL
CADAFUAG00000110	2426.31	0.0661926	0.2951	0.224306	0.822519	0.999997	AFUA_3G00150	Afu3G00150	Short-chain dehydrogenase/oxidoreductase; putative [Source:UniProtKB/TrEMBL
CADAFUAG00000111	47.151	-0.422866	0.660038	-0.640669	0.521737	0.999997	AFUA_3G03590	Afu3G03590	F-box and ankyrin domain protein [Source:UniProtKB/TrEMBL
CADAFUAG00000112	107.294	-1.03972	0.487566	-2.13246	0.0329689	0.999997	AFUA_3G03530	Afu3G03530	Nitroreductase family protein [Source:UniProtKB/TrEMBL
CADAFUAG00000113	11.7694	0.45459	1.27121	0.357605	0.720639	0.999997	AFUA_3G02685	Afu3G02685	Putative uncharacterized protein [Source:UniProtKB/TrEMBL
CADAFUAG00000114	409.084	-0.215273	0.350409	-0.614347	0.538986	0.999997	AFUA_3G00820	Afu3G00820	Putative exported protein [Source:UniProtKB/TrEMBL
CADAFUAG00000115	10.2033	-0.327908	1.32245	-0.247954	0.80417	0.999997	AFUA_3G03270	Afu3G03270	Isochorismatase family hydrolase; putative [Source:UniProtKB/TrEMBL
CADAFUAG00000116	9.34893	0.258911	1.38985	0.186287	0.85222	0.999997	AFUA_3G01320	Afu3G01320	Homocysteine S-methyltransferase; putative [Source:UniProtKB/TrEMBL
CADAFUAG00000117	6.49418	-0.916993	1.60832	-0.570156	0.568572	0.999997	AFUA_3G02770	Afu3G02770	FAD binding domain protein [Source:UniProtKB/TrEMBL
CADAFUAG00000118	140.576	-0.021732	0.451268	-0.0481577	0.961591	0.999997	AFUA_3G00490	Afu3G00490	C6 finger domain protein; putative [Source:UniProtKB/TrEMBL
CADAFUAG00000119	436.576	-0.17836	0.355892	-0.501162	0.616257	0.999997	AFUA_3G03445	Afu3G03445	Short-chain alcohol dehydrogenase; putative [Source:UniProtKB/TrEMBL
CADAFUAG00000120	20.2849	0.417078	0.97683	0.426971	0.669401	0.999997	AFUA_3G03660	Afu3G03660	Siderophore esterase IroE-like; putative [Source:UniProtKB/TrEMBL
CADAFUAG00000121	8.35369	0.0140497	1.46356	0.00959966	0.992341	0.999997	AFUA_3G01520	Afu3G01520	MFS multidrug transporter; putative [Source:UniProtKB/TrEMBL
CADAFUAG00000122	105.812	1.05811	0.51294	2.06284	0.0391281	0.999997	AFUA_3G04120	Afu3G04120	Histone-lysine N-methyltransferase (Bre2); putative [Source:UniProtKB/TrEMBL
CADAFUAG00000123	0	NA	NA	NA	NA	NA
CADAFUAG00000124	2.75439	-1.41003	2.4396	-0.577978	0.563279	0.999997	AFUA_3G02160	Afu3G02160	C6 transcription factor; putative [Source:UniProtKB/TrEMBL
CADAFUAG00000125	85.3743	0.221595	0.531125	0.417217	0.67652	0.999997	AFUA_3G00110	Afu3G00110	Succinate-semialdehyde dehydrogenase; putative [Source:UniProtKB/TrEMBL
CADAFUAG00000126	8.04549	-0.368466	1.46201	-0.252027	0.801021	0.999997	AFUA_3G00530	Afu3G00530	ATP/GTP-binding protein; putative [Source:UniProtKB/TrEMBL
CADAFUAG00000127	199.576	0.900978	0.446514	2.01781	0.0436115	0.999997	AFUA_3G01560	Afu3G01560	Amino acid permease (Can1); putative [Source:UniProtKB/TrEMBL
CADAFUAG00000128	775.651	0.318934	0.322492	0.988965	0.32268	0.999997	AFUA_3G00740	Afu3G00740	2-dehydropantoate 2-reductase [Source:UniProtKB/TrEMBL
CADAFUAG00000129	0.394266	-2.81358	5.94816	-0.473017	0.636201	NA	AFUA_3G03930	Afu3G03930	Cytochrome P450 monooxygenase; putative [Source:UniProtKB/TrEMBL
CADAFUAG00000130	0.894372	2.62777	4.52062	0.581285	0.561048	NA	AFUA_3G03080	Afu3G03080	Endo-1;3(4)-beta-glucanase; putative [Source:UniProtKB/TrEMBL
CADAFUAG00000131	3.96243	-1.58429	2.1016	-0.753847	0.450941	0.999997	AFUA_3G01140	Afu3G01140	Putative uncharacterized protein [Source:UniProtKB/TrEMBL
CADAFUAG00000132	1.22284	3.07468	4.01507	0.765784	0.443805	NA	AFUA_3G03870	Afu3G03870	Endo-1;4-beta-glucanase; putative [Source:UniProtKB/TrEMBL
CADAFUAG00000133	4.60893	-0.569822	1.93642	-0.294266	0.768555	0.999997	AFUA_3G01200	Afu3G01200	Integral membrane protein Pth11-like; putative [Source:UniProtKB/TrEMBL
CADAFUAG00000134	388.982	0.506297	0.385272	1.31413	0.188803	0.999997	AFUA_3G04240	Afu3G04240	Lipase/serine esterase; putative [Source:UniProtKB/TrEMBL
CADAFUAG00000135	1.6829	-0.812036	3.04856	-0.266368	0.789956	0.999997	AFUA_3G01230	Afu3G01230	MFS sugar transporte; putative [Source:UniProtKB/TrEMBL
CADAFUAG00000136	28.1242	-0.458118	0.837466	-0.547029	0.584359	0.999997	AFUA_3G03920	Afu3G03920	C6 transcription factor; putative [Source:UniProtKB/TrEMBL
CADAFUAG00000137	23.7324	-0.312254	0.924463	-0.337768	0.735538	0.999997	AFUA_3G01890	Afu3G01890	MFS multidrug transporter; putative [Source:UniProtKB/TrEMBL
CADAFUAG00000138	32.8724	0.665808	0.795704	0.836753	0.402732	0.999997	AFUA_3G02500	Afu3G02500	Protein kinase; putative [Source:UniProtKB/TrEMBL
CADAFUAG00000139	417.755	-0.318208	0.354864	-0.896704	0.369877	0.999997	AFUA_3G00380	Afu3G00380	Probable beta-galactosidase E [Source:UniProtKB/Swiss-Prot
CADAFUAG00000140	199.29	-0.497423	0.429979	-1.15686	0.247332	0.999997	AFUA_3G03315	Afu3G03315	C6 transcription factor; putative [Source:UniProtKB/TrEMBL
CADAFUAG00000141	0.722736	-1.30454	4.8333	-0.269907	0.787232	NA	AFUA_3G01630	Afu3G01630	RTA1 domain protein; putative [Source:UniProtKB/TrEMBL
CADAFUAG00000142	105.654	0.44335	0.502904	0.88158	0.378004	0.999997	AFUA_3G03710	Afu3G03710	D-aminopeptidase; putative [Source:UniProtKB/TrEMBL
CADAFUAG00000143	86.0388	-0.323882	0.524184	-0.617878	0.536656	0.999997	AFUA_3G00800	Afu3G00800	Oxidoreductase; 2OG-Fe(II) oxygenase family; putative [Source:UniProtKB/TrEMBL
CADAFUAG00000144	14.1394	1.04148	1.18359	0.879929	0.378898	0.999997	AFUA_3G01600	Afu3G01600	Salicylate hydroxylase; putative [Source:UniProtKB/TrEMBL
CADAFUAG00000145	49.538	-0.918698	0.651913	-1.40924	0.158766	0.999997	AFUA_3G01970	Afu3G01970	Putative uncharacterized protein [Source:UniProtKB/TrEMBL
CADAFUAG00000146	172.794	-0.0878747	0.430703	-0.204026	0.838333	0.999997	AFUA_3G02940	Afu3G02940	Allergen; putative [Source:UniProtKB/TrEMBL
CADAFUAG00000147	0.32847	1.14964	6.11021	0.18815	0.850759	NA	AFUA_3G02540	Afu3G02540	Putative uncharacterized protein [Source:UniProtKB/TrEMBL
CADAFUAG00000148	1349.61	-0.619165	0.301168	-2.05588	0.0397938	0.999997	AFUA_3G01290	Afu3G01290	AMID-like mitochondrial oxidoreductase; putative [Source:UniProtKB/TrEMBL
CADAFUAG00000149	5250.79	0.207242	0.326866	0.634027	0.526063	0.999997	AFUA_3G00370	Afu3G00370	Phosphoketolase; putative [Source:UniProtKB/TrEMBL
CADAFUAG00000150	0.394266	-2.81358	5.94816	-0.473017	0.636201	NA	AFUA_3G00620	Afu3G00620	Zinc-containing alcohol dehydrogenase; putative [Source:UniProtKB/TrEMBL
CADAFUAG00000151	112.831	0.1466	0.486033	0.301626	0.762937	0.999997	AFUA_3G03230	Afu3G03230	BZIP transcription factor; putative [Source:UniProtKB/TrEMBL
CADAFUAG00000152	199.409	-0.0297319	0.415763	-0.0715117	0.942991	0.999997	AFUA_3G02240	Afu3G02240	Aromatic-L-amino-acid decarboxylase; putative [Source:UniProtKB/TrEMBL
CADAFUAG00000153	63.4137	-0.215417	0.609534	-0.353412	0.723779	0.999997	AFUA_3G01800	Afu3G01800	GPI anchored dioxygenase; putative [Source:UniProtKB/TrEMBL
CADAFUAG00000154	21.1803	-0.688483	0.937074	-0.734716	0.462513	0.999997	AFUA_3G00570	Afu3G00570	Putative uncharacterized protein [Source:UniProtKB/TrEMBL
CADAFUAG00000155	1121.5	-0.7335	0.344515	-2.12908	0.0332479	0.999997	AFUA_3G00660	Afu3G00660	Putative uncharacterized protein [Source:UniProtKB/TrEMBL
CADAFUAG00000156	55.5968	0.889974	0.655496	1.35771	0.174555	0.999997	AFUA_3G04110	Afu3G04110	rRNA processing protein Bystin; putative [Source:UniProtKB/TrEMBL
CADAFUAG00000157	1.83426	3.65965	3.49599	1.04681	0.295185	0.999997	AFUA_3G03470	Afu3G03470	Putative uncharacterized protein [Source:UniProtKB/TrEMBL
CADAFUAG00000158	5.4375	0.297027	1.80379	0.164668	0.869205	0.999997	AFUA_3G01640	Afu3G01640	C6 finger domain protein; putative [Source:UniProtKB/TrEMBL
CADAFUAG00000159	3437.67	-0.132691	0.336527	-0.394295	0.693364	0.999997	AFUA_3G02830	Afu3G02830	Ankyrin repeat protein [Source:UniProtKB/TrEMBL
CADAFUAG00000160	0	NA	NA	NA	NA	NA	AFUA_3G02410	Afu3G02410
CADAFUAG00000161	27.0334	-1.14622	0.834863	-1.37295	0.169769	0.999997	AFUA_3G02010	Afu3G02010	Cytochrome P450 monooxygenase; putative [Source:UniProtKB/TrEMBL
CADAFUAG00000162	17.5019	-1.24024	1.02573	-1.20914	0.22661	0.999997	AFUA_3G01250	Afu3G01250	Short-chain dehydrogenase/reductase family protein; putative [Source:UniProtKB/TrEMBL
CADAFUAG00000163	57.3224	-0.0647384	0.641594	-0.100902	0.919628	0.999997	AFUA_3G02950	Afu3G02950	Short-chain oxidoreductase; putative [Source:UniProtKB/TrEMBL
CADAFUAG00000164	29.7802	0.377548	0.816601	0.462341	0.643837	0.999997	AFUA_3G02340	Afu3G02340	CBF/NF-Y family transcription factor; putative [Source:UniProtKB/TrEMBL
CADAFUAG00000165	497.494	0.582171	0.350083	1.66295	0.0963224	0.999997	AFUA_3G00440	Afu3G00440	F-box domain protein [Source:UniProtKB/TrEMBL
CADAFUAG00000166	65028.6	-0.373842	0.333703	-1.12028	0.262593	0.999997	AFUA_3G03320	Afu3G03320	MFS monocarboxylate transporter; putative [Source:UniProtKB/TrEMBL
CADAFUAG00000167	2.51695	-1.75863	2.54982	-0.689705	0.49038	0.999997	AFUA_3G02570	Afu3G02570	Polyketide synthase; putative [Source:UniProtKB/TrEMBL
CADAFUAG00000168	50.1774	-0.177757	0.648174	-0.274243	0.783898	0.999997	AFUA_3G01920	Afu3G01920	Acyl-CoA dehydrogenase; putative [Source:UniProtKB/TrEMBL
CADAFUAG00000169	0	NA	NA	NA	NA	NA	AFUA_3G02120	Afu3G02120	Short-chain dehydrogenase/reductase family protein; putative [Source:UniProtKB/TrEMBL
CADAFUAG00000170	13.9321	0.775919	1.18017	0.657461	0.510885	0.999997	AFUA_3G03490	Afu3G03490	O-methyltransferase; putative [Source:UniProtKB/TrEMBL
CADAFUAG00000171	61.2054	-0.449305	0.595297	-0.754759	0.450394	0.999997	AFUA_3G01080	Afu3G01080	Putative uncharacterized protein [Source:UniProtKB/TrEMBL
CADAFUAG00000172	165.643	-0.121674	0.426302	-0.285417	0.775325	0.999997	AFUA_3G00865	Afu3G00865	Putative uncharacterized protein [Source:UniProtKB/TrEMBL
CADAFUAG00000173	724.351	-0.422467	0.333331	-1.26741	0.205009	0.999997	AFUA_3G04040	Afu3G04040	Putative uncharacterized protein [Source:UniProtKB/TrEMBL
CADAFUAG00000174	0	NA	NA	NA	NA	NA	AFUA_3G02640	Afu3G02640	Nucleoside-diphosphate-sugar epimerase family protein [Source:UniProtKB/TrEMBL
CADAFUAG00000175	2154.87	-0.208148	0.295784	-0.703716	0.48161	0.999997	AFUA_3G00850	Afu3G00850	Putative uncharacterized protein [Source:UniProtKB/TrEMBL
CADAFUAG00000176	17.3495	-0.200165	1.09121	-0.183435	0.854457	0.999997	AFUA_3G00700	Afu3G00700	Glycosyl hydrolase; putative [Source:UniProtKB/TrEMBL
CADAFUAG00000177	4.62869	2.4259	2.2684	1.06943	0.284874	0.999997	AFUA_3G02390	Afu3G02390	DNA repair protein Nse1; putative [Source:UniProtKB/TrEMBL
CADAFUAG00000178	6.95424	-1.38539	1.56175	-0.887075	0.375039	0.999997	AFUA_3G01490	Afu3G01490	Alcohol dehydrogenase; putative [Source:UniProtKB/TrEMBL
CADAFUAG00000179	0	NA	NA	NA	NA	NA	AFUA_3G02860	Afu3G02860	Putative uncharacterized protein [Source:UniProtKB/TrEMBL
CADAFUAG00000180	64.1183	-0.780139	0.627044	-1.24415	0.213444	0.999997	AFUA_3G01872	Afu3G01872	Putative uncharacterized protein [Source:UniProtKB/TrEMBL
CADAFUAG00000181	3.82039	0.165856	2.14171	0.0774409	0.938273	0.999997	AFUA_3G01770	Afu3G01770	Putative uncharacterized protein [Source:UniProtKB/TrEMBL
CADAFUAG00000182	3773.16	0.601533	0.288112	2.08784	0.0368119	0.999997	AFUA_3G00910	Afu3G00910	Alpha-1;3-glucan synthase Ags1 [Source:UniProtKB/TrEMBL
CADAFUAG00000183	171.429	0.0128868	0.431224	0.0298842	0.976159	0.999997	AFUA_3G02050	Afu3G02050	Putative uncharacterized protein [Source:UniProtKB/TrEMBL
CADAFUAG00000184	109.035	-0.597158	0.495757	-1.20454	0.228381	0.999997	AFUA_3G01690	Afu3G01690	Sterigmatocystin biosynthesis cytochrome P450 monooxygenase; putative [Source:UniProtKB/TrEMBL
CADAFUAG00000185	102.811	0.651783	0.513193	1.27006	0.204065	0.999997	AFUA_3G04300	Afu3G04300	Actin cytoskeleton organization and biogenesis protein; putative [Source:UniProtKB/TrEMBL
CADAFUAG00000186	819.302	-0.274352	0.318933	-0.860218	0.389669	0.999997	AFUA_3G02080	Afu3G02080	MFS allantoate transporter; putative [Source:UniProtKB/TrEMBL
CADAFUAG00000187	17.1258	1.14737	1.08392	1.05854	0.28981	0.999997	AFUA_3G02760	Afu3G02760	ABC multidrug transporter; putative [Source:UniProtKB/TrEMBL
CADAFUAG00000188	421.989	-0.499165	0.370583	-1.34697	0.17799	0.999997	AFUA_3G03760	Afu3G03760	Putative uncharacterized protein [Source:UniProtKB/TrEMBL
CADAFUAG00000189	247.675	-0.189222	0.391778	-0.482983	0.629108	0.999997	AFUA_3G03010	Afu3G03010	Phosphate-repressible Na+/phosphate cotransporter Pho89; putative [Source:UniProtKB/TrEMBL
CADAFUAG00000190	7420.41	0.301818	0.288132	1.0475	0.29487	0.999997	AFUA_3G01440	Afu3G01440	DUF1212 domain membrane protein [Source:UniProtKB/TrEMBL
CADAFUAG00000191	1191.8	-0.182376	0.352842	-0.516878	0.605241	0.999997	AFUA_3G03140	Afu3G03140	HET domain protein [Source:UniProtKB/TrEMBL
CADAFUAG00000192	0	NA	NA	NA	NA	NA	AFUA_3G03070	Afu3G03070	MYND domain protein; putative [Source:UniProtKB/TrEMBL
CADAFUAG00000193	450.417	-0.229609	0.398394	-0.576336	0.564388	0.999997	AFUA_3G02900	Afu3G02900	Oxidoreductase; short chain dehydrogenase/reductase family [Source:UniProtKB/TrEMBL
CADAFUAG00000194	67.4831	0.809398	0.590071	1.3717	0.170158	0.999997	AFUA_3G01110	Afu3G01110	GMP synthase [Source:UniProtKB/Swiss-Prot
CADAFUAG00000195	10.4462	-0.937987	1.31638	-0.71255	0.476124	0.999997	AFUA_3G02040	Afu3G02040	Glycosyl hydrolase; putative [Source:UniProtKB/TrEMBL
CADAFUAG00000196	3.25449	-0.184284	2.26621	-0.081318	0.935189	0.999997	AFUA_3G02310	Afu3G02310	Pyrroline-5-carboxylate reductase [Source:UniProtKB/TrEMBL
CADAFUAG00000197	14.0237	-0.19836	1.15775	-0.171332	0.863963	0.999997	AFUA_3G00410	Afu3G00410	Putative uncharacterized protein [Source:UniProtKB/TrEMBL
CADAFUAG00000198	1358.46	-0.769297	0.365244	-2.10625	0.0351824	0.999997	AFUA_3G00960	Afu3G00960	Putative uncharacterized protein [Source:UniProtKB/TrEMBL
CADAFUAG00000199	5.62505	-0.959092	1.78635	-0.536899	0.591337	0.999997	AFUA_3G03990	Afu3G03990	Putative uncharacterized protein [Source:UniProtKB/TrEMBL
CADAFUAG00000200	157.109	-0.438217	0.436005	-1.00507	0.314862	0.999997	AFUA_3G01100	Afu3G01100	C2H2 finger domain protein; putative [Source:UniProtKB/TrEMBL
CADAFUAG00000201	298.999	-0.475882	0.36866	-1.29084	0.196759	0.999997	AFUA_3G00170	Afu3G00170	Putative uncharacterized protein [Source:UniProtKB/TrEMBL
CADAFUAG00000202	177.046	-0.353075	0.416727	-0.847257	0.396852	0.999997	AFUA_3G01670	Afu3G01670	MFS hexose transporter; putative [Source:UniProtKB/TrEMBL
CADAFUAG00000203	0	NA	NA	NA	NA	NA	AFUA_3G03815	Afu3G03815	Integral membrane protein [Source:UniProtKB/TrEMBL
CADAFUAG00000204	12.4318	-0.0963217	1.20575	-0.079885	0.936329	0.999997	AFUA_3G03750	Afu3G03750	Putative uncharacterized protein [Source:UniProtKB/TrEMBL
CADAFUAG00000205	56.9486	0.283882	0.63616	0.446243	0.655422	0.999997	AFUA_3G01820	Afu3G01820	Amino acid permease [Source:UniProtKB/TrEMBL
CADAFUAG00000206	0	NA	NA	NA	NA	NA	AFUA_3G02190	Afu3G02190	Putative uncharacterized protein [Source:UniProtKB/TrEMBL
CADAFUAG00000207	905.161	-0.495319	0.322544	-1.53566	0.124621	0.999997	AFUA_3G01430	Afu3G01430	Benzodiazepine receptor family protein [Source:UniProtKB/TrEMBL
CADAFUAG00000208	32.0603	0.0844941	0.821664	0.102833	0.918096	0.999997	AFUA_3G03210	Afu3G03210	Putative uncharacterized protein [Source:UniProtKB/TrEMBL
CADAFUAG00000209	7.74663	0.974788	1.6007	0.608974	0.542541	0.999997	AFUA_3G02720	Afu3G02720	MFS transporter; putative [Source:UniProtKB/TrEMBL
CADAFUAG00000210	791.983	-0.0789979	0.400591	-0.197203	0.843668	0.999997	AFUA_3G02910	Afu3G02910	Dihydroxy-acetone synthase; putative [Source:UniProtKB/TrEMBL
CADAFUAG00000211	29.8224	-0.707565	0.798862	-0.885716	0.375771	0.999997	AFUA_3G04000	Afu3G04000	MFS transporter; putative [Source:UniProtKB/TrEMBL
CADAFUAG00000212	9665.01	0.232265	0.281817	0.824172	0.409842	0.999997	AFUA_3G00840	Afu3G00840	FAD-dependent oxygenase; putative [Source:UniProtKB/TrEMBL
CADAFUAG00000213	36.0606	1.13178	0.776371	1.45778	0.144901	0.999997	AFUA_3G03150	Afu3G03150	Putative uncharacterized protein [Source:UniProtKB/TrEMBL
CADAFUAG00000214	34.9413	-0.318658	0.758356	-0.420196	0.674343	0.999997	AFUA_3G03380	Afu3G03380	Sugar O-acetyltransferase; putative [Source:UniProtKB/TrEMBL
CADAFUAG00000215	187.08	-1.11924	0.410899	-2.72389	0.00645181	0.742938	AFUA_3G02450	Afu3G02450	Putative uncharacterized protein [Source:UniProtKB/TrEMBL
CADAFUAG00000216	12.179	0.5118	1.25429	0.408039	0.683245	0.999997	AFUA_3G01060	Afu3G01060	Putative uncharacterized protein [Source:UniProtKB/TrEMBL
CADAFUAG00000217	46.9366	0.267143	0.695809	0.383931	0.70103	0.999997	AFUA_3G01190	Afu3G01190	Serine/threonine protein kinase; putative [Source:UniProtKB/TrEMBL
CADAFUAG00000218	0.282951	1.04089	6.11615	0.170187	0.864863	NA	AFUA_3G03000	Afu3G03000	Phosphatidylethanolamine-binding protein; putative [Source:UniProtKB/TrEMBL
CADAFUAG00000219	28794.3	-0.244794	0.299449	-0.817479	0.413655	0.999997	AFUA_3G03370	Afu3G03370	Cell surface protein; putative [Source:UniProtKB/TrEMBL
CADAFUAG00000220	14.6603	0.0718508	1.11863	0.0642308	0.948786	0.999997	AFUA_3G03970	Afu3G03970	Cytochrome b5 reductase; putative [Source:UniProtKB/TrEMBL
CADAFUAG00000221	7.85358	-0.43241	1.50725	-0.286887	0.774199	0.999997	AFUA_3G02300	Afu3G02300	Proline oxidase Put1; putative [Source:UniProtKB/TrEMBL
CADAFUAG00000222	24263.5	-0.330997	0.314989	-1.05082	0.293341	0.999997	AFUA_3G03580	Afu3G03580	Transferase family protein [Source:UniProtKB/TrEMBL
CADAFUAG00000223	163.297	-0.522012	0.435603	-1.19837	0.230774	0.999997	AFUA_3G01980	Afu3G01980	Chromatin structure remodeling complex protein RSC3; putative [Source:UniProtKB/TrEMBL
CADAFUAG00000224	12.1434	0.514086	1.24195	0.413934	0.678922	0.999997	AFUA_3G02460	Afu3G02460	Serine protein kinase; putative [Source:UniProtKB/TrEMBL
CADAFUAG00000225	8.08605	-0.920464	1.4753	-0.623917	0.532682	0.999997	AFUA_3G02750	Afu3G02750	C6 transcription factor; putative [Source:UniProtKB/TrEMBL
CADAFUAG00000226	693.917	0.005726	0.333722	0.017158	0.986311	0.999997	AFUA_3G03430	Afu3G03430	ABC multidrug transporter SitT [Source:UniProtKB/TrEMBL
CADAFUAG00000227	8.13653	-0.346484	1.47362	-0.235125	0.814112	0.999997	AFUA_3G00940	Afu3G00940	Putative uncharacterized protein [Source:UniProtKB/TrEMBL
CADAFUAG00000228	15.808	-0.411357	1.06835	-0.385041	0.700207	0.999997	AFUA_3G02020	Afu3G02020
CADAFUAG00000229	6.75189	-1.13449	1.64197	-0.690933	0.489608	0.999997	AFUA_3G00520	Afu3G00520	SIR2 family histone deacetylase; putative [Source:UniProtKB/TrEMBL
CADAFUAG00000230	49.1925	-0.4645	0.663067	-0.700533	0.483595	0.999997	AFUA_3G00450	Afu3G00450	NmrA-like family protein [Source:UniProtKB/TrEMBL
CADAFUAG00000231	2.36012	-0.99616	2.61747	-0.380582	0.703513	0.999997	AFUA_3G01780	Afu3G01780	Alcohol dehydrogenase; putative [Source:UniProtKB/TrEMBL
CADAFUAG00000232	11.3499	0.385367	1.33059	0.28962	0.772107	0.999997	AFUA_3G00320	Afu3G00320	Endo-1;4-beta-xylanase xynf11a [Source:UniProtKB/Swiss-Prot
CADAFUAG00000233	71.6965	-0.356964	0.560438	-0.636937	0.524166	0.999997	AFUA_3G02400	Afu3G02400	UbiE/COQ5 methyltransferase; putative [Source:UniProtKB/TrEMBL
CADAFUAG00000234	1031.66	-0.114724	0.308925	-0.371366	0.710365	0.999997	AFUA_3G01580	Afu3G01580	GMC oxidoreductase; putative [Source:UniProtKB/TrEMBL
CADAFUAG00000235	2.95126	0.451774	2.40581	0.187785	0.851045	0.999997	AFUA_3G02260	Afu3G02260	Putative uncharacterized protein [Source:UniProtKB/TrEMBL
CADAFUAG00000236	14.2968	-0.1619	1.12203	-0.144292	0.88527	0.999997	AFUA_3G00920	Afu3G00920	RTA1 domain protein; putative [Source:UniProtKB/TrEMBL
CADAFUAG00000237	34.5569	-0.271869	0.753366	-0.360872	0.718195	0.999997	AFUA_3G02480	Afu3G02480	C6 transcription factor; putative [Source:UniProtKB/TrEMBL
CADAFUAG00000238	11.5429	-0.871332	1.23124	-0.707685	0.479141	0.999997	AFUA_3G04050	Afu3G04050	Putative uncharacterized protein [Source:UniProtKB/TrEMBL
CADAFUAG00000239	84.7716	-0.527302	0.53056	-0.993859	0.320291	0.999997	AFUA_3G02785	Afu3G02785	Putative uncharacterized protein [Source:UniProtKB/TrEMBL
CADAFUAG00000240	2916.1	-0.978298	0.333849	-2.93036	0.00338568	0.540343	AFUA_3G00590	Afu3G00590	Asp-hemolysin [Source:UniProtKB/Swiss-Prot
CADAFUAG00000241	52.8967	-0.294233	0.631005	-0.466293	0.641006	0.999997	AFUA_3G00470	Afu3G00470	Endo-1;4-beta-xylanase [Source:UniProtKB/TrEMBL
CADAFUAG00000242	13.1491	0.438843	1.19244	0.368022	0.712857	0.999997	AFUA_3G00760	Afu3G00760	GNAT family N-acetyltransferase; putative [Source:UniProtKB/TrEMBL
CADAFUAG00000243	3689.36	-0.535009	0.311972	-1.71493	0.0863589	0.999997	AFUA_3G00810	Afu3G00810	Cholestenol delta-isomerase; putative [Source:UniProtKB/TrEMBL
CADAFUAG00000244	25.3906	-0.89442	0.859507	-1.04062	0.298052	0.999997	AFUA_3G01150	Afu3G01150	GPI anchored cell wall protein; putative [Source:UniProtKB/TrEMBL
CADAFUAG00000245	255.944	-0.343936	0.380158	-0.904716	0.365616	0.999997	AFUA_3G04030	Afu3G04030	Succinyl-CoA:3-ketoacid-coenzyme A transferase [Source:UniProtKB/TrEMBL
CADAFUAG00000246	260.295	0.361624	0.386847	0.934799	0.349892	0.999997	AFUA_3G00690	Afu3G00690	C6 transcription factor; putative [Source:UniProtKB/TrEMBL
CADAFUAG00000247	58.4582	0.538197	0.622055	0.865192	0.386933	0.999997	AFUA_3G01400	Afu3G01400	ABC multidrug transporter; putative [Source:UniProtKB/TrEMBL
CADAFUAG00000248	399.059	-0.049166	0.356354	-0.13797	0.890264	0.999997	AFUA_3G00650	Afu3G00650	Probable leucine aminopeptidase 2 [Source:UniProtKB/Swiss-Prot
CADAFUAG00000249	42.8995	-0.0976381	0.729764	-0.133794	0.893565	0.999997	AFUA_3G01240	Afu3G01240	Putative uncharacterized protein [Source:UniProtKB/TrEMBL
CADAFUAG00000250	35.289	0.0624336	0.754359	0.0827639	0.934039	0.999997	AFUA_3G04250	Afu3G04250	Inositol monophosphatase; putative [Source:UniProtKB/TrEMBL
CADAFUAG00000251	169.693	-0.467961	0.422519	-1.10755	0.268056	0.999997	AFUA_3G03740	Afu3G03740	Protein kinase; putative [Source:UniProtKB/TrEMBL
CADAFUAG00000252	71.282	-0.303769	0.561754	-0.540752	0.588679	0.999997	AFUA_3G01880	Afu3G01880	Fungal specific transcription factor; putative [Source:UniProtKB/TrEMBL
CADAFUAG00000253	54.6256	-0.52503	0.623285	-0.842359	0.399587	0.999997	AFUA_3G01910	Afu3G01910	Probable 1;4-beta-D-glucan cellobiohydrolase C [Source:UniProtKB/Swiss-Prot
CADAFUAG00000254	35.4968	-0.210569	0.745299	-0.28253	0.777537	0.999997	AFUA_3G03520	Afu3G03520	Integral membrane protein [Source:UniProtKB/TrEMBL
CADAFUAG00000255	94.2044	-0.966976	0.51916	-1.86258	0.0625218	0.999997	AFUA_3G03310	Afu3G03310	RTA1 domain protein [Source:UniProtKB/TrEMBL
CADAFUAG00000256	0.32847	1.14964	6.11021	0.18815	0.850759	NA	AFUA_3G02560	Afu3G02560	Putative uncharacterized protein [Source:UniProtKB/TrEMBL
CADAFUAG00000257	33.4558	-0.491984	0.768084	-0.640534	0.521826	0.999997	AFUA_3G00790	Afu3G00790	Methylaspartate ammonia-lyase; putative [Source:UniProtKB/TrEMBL
CADAFUAG00000258	1.00569	-0.368647	3.89257	-0.0947054	0.924549	NA	AFUA_3G01660	Afu3G01660	Glycosyl hydrolase; family 43; putative [Source:UniProtKB/TrEMBL
CADAFUAG00000259	0.788532	-3.81359	4.93379	-0.772954	0.43955	NA	AFUA_3G02600	Afu3G02600	Putative uncharacterized protein [Source:UniProtKB/TrEMBL
CADAFUAG00000260	8.11626	-0.0515347	1.50979	-0.0341338	0.97277	0.999997	AFUA_3G02216	Afu3G02216	Putative uncharacterized protein [Source:UniProtKB/TrEMBL
CADAFUAG00000261	0.788532	-3.81359	4.93379	-0.772954	0.43955	NA	AFUA_3G02200	Afu3G02200	Putative uncharacterized protein [Source:UniProtKB/TrEMBL
CADAFUAG00000262	1.79422	-1.95438	2.98089	-0.655637	0.512058	0.999997	AFUA_3G02550	Afu3G02550	Putative uncharacterized protein [Source:UniProtKB/TrEMBL
CADAFUAG00000263	1683.14	-0.0904556	0.303197	-0.298339	0.765444	0.999997	AFUA_3G03180	Afu3G03180	NAD binding Rossmann fold oxidoreductase; putative [Source:UniProtKB/TrEMBL
CADAFUAG00000264	58.7548	-0.473053	0.612318	-0.772561	0.439782	0.999997	AFUA_3G03900	Afu3G03900	C6 transcription factor; putative [Source:UniProtKB/TrEMBL
CADAFUAG00000265	7.14565	0.391927	1.57526	0.248801	0.803515	0.999997	AFUA_3G01180	Afu3G01180	Sarcosine oxidase; putative [Source:UniProtKB/TrEMBL
CADAFUAG00000266	107.177	-0.194034	0.504068	-0.384937	0.700284	0.999997	AFUA_3G02330	Afu3G02330	Chromatin remodeling complex subunit (Arp9); putative [Source:UniProtKB/TrEMBL
CADAFUAG00000267	120.839	-0.36383	0.466891	-0.77926	0.435827	0.999997	AFUA_3G03700	Afu3G03700	MFS sugar transporter; putative [Source:UniProtKB/TrEMBL
CADAFUAG00000268	11.1377	0.605388	1.2991	0.466006	0.641212	0.999997	AFUA_3G00765	Afu3G00765	N-acetyltransferase; GNAT family; putative [Source:UniProtKB/TrEMBL
CADAFUAG00000269	101.632	0.449815	0.527507	0.852719	0.393815	0.999997	AFUA_3G02820	Afu3G02820
CADAFUAG00000270	0	NA	NA	NA	NA	NA	AFUA_3G02180	Afu3G02180	AM-toxin synthetase [Source:UniProtKB/TrEMBL
CADAFUAG00000271	202.586	-0.20679	0.402582	-0.51366	0.60749	0.999997	AFUA_3G02250	Afu3G02250	3-beta hydroxysteroid dehydrogenase/isomerase family protein [Source:UniProtKB/TrEMBL
CADAFUAG00000272	235978	0.881729	0.306452	2.87722	0.00401199	0.608284	AFUA_3G00270	Afu3G00270	Probable glucan endo-1;3-beta-glucosidase eglC [Source:UniProtKB/Swiss-Prot
CADAFUAG00000273	9.79916	-0.189723	1.36475	-0.139017	0.889437	0.999997	AFUA_3G00290	Afu3G00290	3-hydroxyacyl-CoA dehydrogenase; putative [Source:UniProtKB/TrEMBL
CADAFUAG00000274	76.4497	0.159508	0.557442	0.286143	0.774769	0.999997	AFUA_3G00310	Afu3G00310	Extracellular phytase; putative [Source:UniProtKB/TrEMBL
CADAFUAG00000275	4.04302	-0.92005	2.03123	-0.452953	0.650583	0.999997	AFUA_3G00210	Afu3G00210	C6 finger domain protein; putative [Source:UniProtKB/TrEMBL
CADAFUAG00000276	1.05121	-0.282201	4.12871	-0.0683509	0.945506	NA	AFUA_3G02130	Afu3G02130	Oxidoreductase; zinc-binding; putative [Source:UniProtKB/TrEMBL
CADAFUAG00000277	234.875	-0.0361909	0.399286	-0.090639	0.927779	0.999997	AFUA_3G02253	Afu3G02253	YjgH family protein [Source:UniProtKB/TrEMBL
CADAFUAG00000278	67.9058	-0.241106	0.574497	-0.419682	0.674718	0.999997	AFUA_3G02970	Afu3G02970	Aspergillopepsin; putative [Source:UniProtKB/TrEMBL
CADAFUAG00000279	25.7948	-0.58851	0.909857	-0.646816	0.517751	0.999997	AFUA_3G03860	Afu3G03860	3-hydroxyacyl-CoA dehydrogenase; putative [Source:UniProtKB/TrEMBL
CADAFUAG00000280	1223.82	0.247262	0.303486	0.814742	0.41522	0.999997	AFUA_3G02780	Afu3G02780	MFS multidrug transporter; putative [Source:UniProtKB/TrEMBL
CADAFUAG00000281	16.6564	0.503478	1.07256	0.469415	0.638773	0.999997	AFUA_3G01480	Afu3G01480	Putative uncharacterized protein [Source:UniProtKB/TrEMBL
CADAFUAG00000282	10037.9	-0.399026	0.299925	-1.33042	0.18338	0.999997	AFUA_3G02380	Afu3G02380	U2 auxiliary factor small subunit; putative [Source:UniProtKB/TrEMBL
CADAFUAG00000283	2614.2	-0.298937	0.333532	-0.896277	0.370105	0.999997	AFUA_3G01090	Afu3G01090	Putative uncharacterized protein [Source:UniProtKB/TrEMBL
CADAFUAG00000284	1.07148	-2.39775	4.03937	-0.593595	0.552783	NA	AFUA_3G02175	Afu3G02175	BTB/POZ domain protein [Source:UniProtKB/TrEMBL
CADAFUAG00000285	58294.7	0.170984	0.291434	0.586698	0.557406	0.999997	AFUA_3G00900	Afu3G00900	Alpha-amylase; putative [Source:UniProtKB/TrEMBL
CADAFUAG00000286	8.07074	-0.0620963	1.49345	-0.0415791	0.966834	0.999997	AFUA_3G02290	Afu3G02290	Arylsulfatase; putative [Source:UniProtKB/TrEMBL
CADAFUAG00000287	98.0923	-0.378775	0.501172	-0.755778	0.449782	0.999997	AFUA_3G00330	Afu3G00330	NAD dependent epimerase/dehydratase family protein [Source:UniProtKB/TrEMBL
CADAFUAG00000288	126.38	-0.0035899	0.463698	-0.00774189	0.993823	0.999997	AFUA_3G01330	Afu3G01330	Class II aldolase/adducin domain protein [Source:UniProtKB/TrEMBL
CADAFUAG00000289	0	NA	NA	NA	NA	NA	AFUA_3G02585	Afu3G02585	Integral membrane protein [Source:UniProtKB/TrEMBL
CADAFUAG00000290	157.846	-0.276527	0.430784	-0.641916	0.520928	0.999997	AFUA_3G01070	Afu3G01070	Tyrosinase; putative [Source:UniProtKB/TrEMBL
CADAFUAG00000291	3.36581	-0.812299	2.20357	-0.368629	0.712405	0.999997	AFUA_3G02030	Afu3G02030
CADAFUAG00000292	4.76028	0.601177	1.93662	0.310425	0.756238	0.999997	AFUA_3G03460	Afu3G03460	HAD superfamily hydrolase; putative [Source:UniProtKB/TrEMBL
CADAFUAG00000293	18.1873	0.204842	1.06444	0.19244	0.847397	0.999997	AFUA_3G01020	Afu3G01020	Putative uncharacterized protein [Source:UniProtKB/TrEMBL
CADAFUAG00000294	52.2392	-0.0892941	0.636314	-0.14033	0.888399	0.999997	AFUA_3G01370	Afu3G01370	MFS transporter; putative [Source:UniProtKB/TrEMBL
CADAFUAG00000295	0.722736	-1.30454	4.8333	-0.269907	0.787232	NA	AFUA_3G00120	Afu3G00120	Amino acid transporter (Mtr); putative [Source:UniProtKB/TrEMBL
CADAFUAG00000296	2223.26	-0.370772	0.315256	-1.1761	0.239556	0.999997	AFUA_3G02000	Afu3G02000	C6 transcription factor Ctf1B-like; putative [Source:UniProtKB/TrEMBL
CADAFUAG00000297	499.386	0.216805	0.33584	0.645559	0.518565	0.999997	AFUA_3G04310	Afu3G04310	SnoRNA binding protein; putative [Source:UniProtKB/TrEMBL
CADAFUAG00000298	18.4418	-1.08084	1.00421	-1.07631	0.281789	0.999997	AFUA_3G03540	Afu3G03540	PKS-like enzyme; putative [Source:UniProtKB/TrEMBL
CADAFUAG00000299	0	NA	NA	NA	NA	NA	AFUA_3G02110	Afu3G02110	MFS multidrug transporter; putative [Source:UniProtKB/TrEMBL
CADAFUAG00000300	208.276	0.152391	0.414659	0.36751	0.713239	0.999997	AFUA_3G00340	Afu3G00340	Glycosyl hydrolase; putative [Source:UniProtKB/TrEMBL
CADAFUAG00000301	2.71383	0.275548	2.56326	0.107499	0.914393	0.999997	AFUA_3G00480	Afu3G00480	RTA1 domain protein; putative [Source:UniProtKB/TrEMBL
CADAFUAG00000302	96.756	0.0211146	0.505598	0.0417616	0.966689	0.999997	AFUA_3G00930	Afu3G00930	C6 transcription factor; putative [Source:UniProtKB/TrEMBL
CADAFUAG00000303	25.6318	-0.128709	0.86545	-0.148719	0.881776	0.999997	AFUA_3G02870	Afu3G02870	NUDIX domain; putative [Source:UniProtKB/TrEMBL
CADAFUAG00000304	4.38629	0.447033	2.04811	0.218266	0.827222	0.999997	AFUA_3G01510	Afu3G01510	C6 transcription factor; putative [Source:UniProtKB/TrEMBL
CADAFUAG00000305	7.44887	0.107519	1.54003	0.0698161	0.94434	0.999997	AFUA_3G02213	Afu3G02213	Putative uncharacterized protein [Source:UniProtKB/TrEMBL
CADAFUAG00000306	616.568	-0.0316572	0.328736	-0.0962998	0.923282	0.999997	AFUA_3G04170	Afu3G04170	Pyruvate dehydrogenase E1 beta subunit PdbA; putative [Source:UniProtKB/TrEMBL
CADAFUAG00000307	2.16273	3.89553	3.32482	1.17165	0.241337	0.999997	AFUA_3G01270	Afu3G01270	Putative uncharacterized protein [Source:UniProtKB/TrEMBL
CADAFUAG00000308	2.24881	-0.10045	2.72265	-0.036894	0.970569	0.999997	AFUA_3G00970	Afu3G00970	Putative uncharacterized protein [Source:UniProtKB/TrEMBL
CADAFUAG00000309	629.194	0.362199	0.332206	1.09028	0.275588	0.999997	AFUA_3G03940	Afu3G03940	2;3-diketo-5-methylthio-1-phosphopentane phosphatase; putative [Source:UniProtKB/TrEMBL
CADAFUAG00000310	35.7146	-0.201362	0.777455	-0.259002	0.795634	0.999997	AFUA_3G00420	Afu3G00420	Acetyl xylan esterase (Axe1); putative [Source:UniProtKB/TrEMBL
CADAFUAG00000311	56.5762	-0.398639	0.613579	-0.649694	0.51589	0.999997	AFUA_3G00350	Afu3G00350	Putative uncharacterized protein [Source:UniProtKB/TrEMBL
CADAFUAG00000312	2.99678	0.477195	2.41984	0.197201	0.84367	0.999997	AFUA_3G02880	Afu3G02880	Alpha-L-rhamnosidase C; putative [Source:UniProtKB/TrEMBL
CADAFUAG00000313	404.509	0.308949	0.34864	0.886156	0.375533	0.999997	AFUA_3G01410	Afu3G01410	Polyketide synthase; putative [Source:UniProtKB/TrEMBL
CADAFUAG00000314	209.985	-0.243937	0.404985	-0.602335	0.546951	0.999997	AFUA_3G04200	Afu3G04200	N2;N2-dimethylguanosine tRNA methyltransferase [Source:UniProtKB/TrEMBL
CADAFUAG00000315	109.114	-0.135375	0.51307	-0.263853	0.791893	0.999997	AFUA_3G00250	Afu3G00250	Salicylate hydroxylase; putative [Source:UniProtKB/TrEMBL
CADAFUAG00000316	1510.74	0.194701	0.299926	0.649164	0.516232	0.999997	AFUA_3G00710	Afu3G00710	Allergen Asp F4-like; putative [Source:UniProtKB/TrEMBL
CADAFUAG00000317	531.626	-0.314575	0.331239	-0.949694	0.342268	0.999997	AFUA_3G02270	Afu3G02270	Catalase B [Source:UniProtKB/Swiss-Prot
CADAFUAG00000318	2771.2	-0.126707	0.290909	-0.435556	0.663159	0.999997	AFUA_3G03440	Afu3G03440	MFS siderophore iron transporter; putative [Source:UniProtKB/TrEMBL
CADAFUAG00000319	2.22853	1.21672	2.85858	0.425637	0.670372	0.999997	AFUA_3G00630	Afu3G00630	Putative uncharacterized protein [Source:UniProtKB/TrEMBL
CADAFUAG00000320	84.4696	0.361337	0.53709	0.672768	0.501095	0.999997	AFUA_3G01840	Afu3G01840	MFS transporter; putative [Source:UniProtKB/TrEMBL
CADAFUAG00000321	1.85454	0.898137	3.09438	0.290248	0.771626	0.999997	AFUA_3G00460	Afu3G00460	Putative uncharacterized protein [Source:UniProtKB/TrEMBL
CADAFUAG00000322	33.0923	-0.591311	0.786636	-0.751696	0.452234	0.999997	AFUA_3G00680	Afu3G00680	Amine oxidase [Source:UniProtKB/TrEMBL
CADAFUAG00000323	4838.57	0.246363	0.285463	0.863031	0.38812	0.999997	AFUA_3G03400	Afu3G03400	Siderophore biosynthesis acetylase AceI; putative [Source:UniProtKB/TrEMBL
CADAFUAG00000324	20.6232	0.45356	0.96574	0.46965	0.638605	0.999997	AFUA_3G01050	Afu3G01050	Putative uncharacterized protein [Source:UniProtKB/TrEMBL
CADAFUAG00000325	4.05782	0.293612	2.16593	0.135559	0.89217	0.999997	AFUA_3G01002	Afu3G01002	FAD dependent oxidoreductase; putative [Source:UniProtKB/TrEMBL
CADAFUAG00000326	38.7469	-0.39857	0.724993	-0.549757	0.582486	0.999997	AFUA_3G02840	Afu3G02840	Isopropanol dehydrogenase; putative [Source:UniProtKB/TrEMBL
CADAFUAG00000327	14.1043	0.790136	1.20082	0.657995	0.510541	0.999997	AFUA_3G00300	Afu3G00300
CADAFUAG00000328	13456.8	0.0236328	0.300439	0.0786611	0.937302	0.999997	AFUA_3G03570	Afu3G03570	67 kDa myosin-cross-reactive antigen family protein [Source:UniProtKB/TrEMBL
CADAFUAG00000329	44.107	-1.74321	0.681006	-2.55976	0.0104745	0.917139	AFUA_3G02430	Afu3G02430	Putative uncharacterized protein [Source:UniProtKB/TrEMBL
CADAFUAG00000330	45.2922	-0.42397	0.771432	-0.549589	0.582601	0.999997	AFUA_3G03170	Afu3G03170	Flavin-containing monooxygenase; putative [Source:UniProtKB/TrEMBL
CADAFUAG00000331	0	NA	NA	NA	NA	NA	AFUA_3G02610	Afu3G02610	MFS transporter; putative [Source:UniProtKB/TrEMBL
CADAFUAG00000332	8.39424	-0.549378	1.42917	-0.384403	0.70068	0.999997	AFUA_3G02920	Afu3G02920	C6 transcription factor; putative [Source:UniProtKB/TrEMBL
CADAFUAG00000333	13.7561	-0.07362	1.16697	-0.0630866	0.949698	0.999997	AFUA_3G01350	Afu3G01350	Proteinase; putative [Source:UniProtKB/TrEMBL
CADAFUAG00000334	37.1589	0.168399	0.740459	0.227425	0.820093	0.999997	AFUA_3G01810	Afu3G01810	F-box domain protein [Source:UniProtKB/TrEMBL
CADAFUAG00000335	700279	0.351004	0.279514	1.25577	0.209201	0.999997	AFUA_3G00880	Afu3G00880	UPF0619 GPI-anchored membrane protein AFUA_3G00880 [Source:UniProtKB/Swiss-Prot
CADAFUAG00000336	9.43997	0.275558	1.3759	0.200275	0.841265	0.999997	AFUA_3G02140	Afu3G02140	Ion channel; putative [Source:UniProtKB/TrEMBL
CADAFUAG00000337	1.6977	3.55898	3.92077	0.907723	0.364024	0.999997	AFUA_3G02470	Afu3G02470	Amidase family protein [Source:UniProtKB/TrEMBL
CADAFUAG00000338	47.094	0.15609	0.66701	0.234015	0.814974	0.999997	AFUA_3G00640	Afu3G00640	Putative uncharacterized protein [Source:UniProtKB/TrEMBL
CADAFUAG00000339	360.589	0.285852	0.355272	0.804599	0.421051	0.999997	AFUA_3G01850	Afu3G01850	Porphyromonas-type peptidyl-arginine deiminase superfamily [Source:UniProtKB/TrEMBL
CADAFUAG00000340	12.5946	-1.73222	1.22384	-1.4154	0.156952	0.999997	AFUA_3G03820	Afu3G03820	MFS nicotinic acid transporter Tna1; putative [Source:UniProtKB/TrEMBL
CADAFUAG00000341	7.24216	-0.63483	1.56788	-0.404898	0.685552	0.999997	AFUA_3G03300	Afu3G03300	FAD-binding oxidoreductase; putative [Source:UniProtKB/TrEMBL
CADAFUAG00000342	0	NA	NA	NA	NA	NA	AFUA_3G02590	Afu3G02590	C6 transcription factor; putative [Source:UniProtKB/TrEMBL
CADAFUAG00000343	2.01137	-0.368586	2.80996	-0.131171	0.89564	0.999997	AFUA_3G01160	Afu3G01160	Iron-sulfur cluster-binding protein; rieske family domain protein [Source:UniProtKB/TrEMBL
CADAFUAG00000344	39.6659	-0.216992	0.713631	-0.304068	0.761076	0.999997	AFUA_3G04260	Afu3G04260	DNA-binding protein HGH1; putative [Source:UniProtKB/TrEMBL
CADAFUAG00000345	0	NA	NA	NA	NA	NA	AFUA_3G01220	Afu3G01220	Probable aspartic-type endopeptidase AFUA_3G01220 [Source:UniProtKB/Swiss-Prot
CADAFUAG00000346	0	NA	NA	NA	NA	NA	AFUA_3G02650	Afu3G02650	MYB DNA binding domain protein [Source:UniProtKB/TrEMBL
CADAFUAG00000347	16.2314	1.05168	1.10497	0.951765	0.341216	0.999997	AFUA_3G02960	Afu3G02960	Putative uncharacterized protein [Source:UniProtKB/TrEMBL
CADAFUAG00000348	237.873	-0.411971	0.386428	-1.0661	0.286379	0.999997	AFUA_3G00750	Afu3G00750	Short-chain dehydrogenase/reductase; putative [Source:UniProtKB/TrEMBL
CADAFUAG00000349	33709.8	-0.12949	0.28482	-0.454637	0.64937	0.999997	AFUA_3G03620	Afu3G03620	Glycosyl transferase; putative [Source:UniProtKB/TrEMBL
CADAFUAG00000350	85.7708	-0.162723	0.537733	-0.30261	0.762187	0.999997	AFUA_3G00830	Afu3G00830	Pfs domain protein [Source:UniProtKB/TrEMBL
CADAFUAG00000351	1.70815	0.721914	3.45035	0.209229	0.834269	0.999997	AFUA_3G01710	Afu3G01710	TPR domain protein [Source:UniProtKB/TrEMBL
CADAFUAG00000352	9.39993	-0.530246	1.35528	-0.391245	0.695616	0.999997	AFUA_3G04010	Afu3G04010	MFS transporter; putative [Source:UniProtKB/TrEMBL
CADAFUAG00000353	11.351	-0.923563	1.24057	-0.74447	0.456592	0.999997	AFUA_3G03240	Afu3G03240	MFS monocarboxylate transporter; putative [Source:UniProtKB/TrEMBL
CADAFUAG00000354	3.85111	-1.07814	2.08041	-0.518236	0.604294	0.999997	AFUA_3G03295	Afu3G03295	Putative uncharacterized protein [Source:UniProtKB/TrEMBL
CADAFUAG00000355	12.5629	0.57712	1.21677	0.474304	0.635283	0.999997	AFUA_3G03950	Afu3G03950	Endoglucanase; putative [Source:UniProtKB/TrEMBL
CADAFUAG00000356	6.34231	0.142585	1.67581	0.085084	0.932195	0.999997	AFUA_3G01470	Afu3G01470	Putative uncharacterized protein [Source:UniProtKB/TrEMBL
CADAFUAG00000357	782.463	-0.8601	0.33935	-2.53455	0.0112592	0.935464	AFUA_3G00670	Afu3G00670	DUF1275 domain protein [Source:UniProtKB/TrEMBL
CADAFUAG00000358	214.752	-0.372716	0.398489	-0.935324	0.349622	0.999997	AFUA_3G03630	Afu3G03630	Putative uncharacterized protein [Source:UniProtKB/TrEMBL
CADAFUAG00000359	16.5253	-0.00572478	1.0533	-0.00543511	0.995663	0.999997	AFUA_3G03250	Afu3G03250	Aldehyde dehydrogenase family protein; putative [Source:UniProtKB/TrEMBL
CADAFUAG00000360	161.122	0.299254	0.445877	0.671159	0.502119	0.999997	AFUA_3G00220	Afu3G00220	MFS sugar transporter; putative [Source:UniProtKB/TrEMBL
CADAFUAG00000361	14596.6	-0.0608653	0.321269	-0.189453	0.849738	0.999997	AFUA_3G04210	Afu3G04210	Fatty acid synthase alpha subunit FasA [Source:UniProtKB/TrEMBL
CADAFUAG00000362	5.33663	0.2464	1.82706	0.134861	0.892722	0.999997	AFUA_3G01280	Afu3G01280	Alpha/beta hydrolase; putative [Source:UniProtKB/TrEMBL
CADAFUAG00000363	29.8822	-0.1473	0.804937	-0.182996	0.854801	0.999997	AFUA_3G01750	Afu3G01750	G protein coupled receptor family protein [Source:UniProtKB/TrEMBL
CADAFUAG00000364	47.6023	-0.795938	0.694889	-1.14542	0.252036	0.999997	AFUA_3G03852	Afu3G03852	C2H2 type zinc finger domain protein [Source:UniProtKB/TrEMBL
CADAFUAG00000365	31.4839	-0.186244	0.80116	-0.232468	0.816174	0.999997	AFUA_3G03910	Afu3G03910	IQ calmodulin-binding motif protein [Source:UniProtKB/TrEMBL
CADAFUAG00000366	7.74227	-0.153619	1.51313	-0.101524	0.919134	0.999997	AFUA_3G02100	Afu3G02100	Short-chain dehydrogenase/reductase; putative [Source:UniProtKB/TrEMBL
CADAFUAG00000367	122.244	0.474397	0.482093	0.984037	0.325097	0.999997	AFUA_3G02257	Afu3G02257	Putative uncharacterized protein [Source:UniProtKB/TrEMBL
CADAFUAG00000368	4.56837	0.514364	1.96057	0.262354	0.793048	0.999997	AFUA_3G01620	Afu3G01620	Ankyrin and HET domain protein [Source:UniProtKB/TrEMBL
CADAFUAG00000369	135.063	-0.0907432	0.453485	-0.200102	0.841401	0.999997	AFUA_3G03390	Afu3G03390	Siderophore biosynthesis lipase/esterase; putative [Source:UniProtKB/TrEMBL
CADAFUAG00000370	9.65713	0.62416	1.37912	0.452578	0.650852	0.999997	AFUA_3G02700	Afu3G02700	C6 transcription factor; putative [Source:UniProtKB/TrEMBL
CADAFUAG00000371	5.16499	-0.315874	1.88044	-0.167979	0.8666	0.999997	AFUA_3G01310	Afu3G01310	Putative uncharacterized protein [Source:UniProtKB/TrEMBL
CADAFUAG00000372	19.0987	-0.979804	0.99649	-0.983255	0.325482	0.999997	AFUA_3G01360	Afu3G01360	Siderochrome-iron transporter; putative [Source:UniProtKB/TrEMBL
CADAFUAG00000373	39.519	0.0912882	0.718596	0.127037	0.898911	0.999997	AFUA_3G03190	Afu3G03190	MFS multidrug transporter; putative [Source:UniProtKB/TrEMBL
CADAFUAG00000374	86.9536	-0.217186	0.534795	-0.40611	0.684662	0.999997	AFUA_3G03790	Afu3G03790	Putative uncharacterized protein [Source:UniProtKB/TrEMBL
CADAFUAG00000375	1257.57	0.160092	0.306146	0.522928	0.601024	0.999997	AFUA_3G04070	Afu3G04070	BZIP transcription factor HacA [Source:UniProtKB/TrEMBL
CADAFUAG00000376	3141.23	-0.351508	0.292532	-1.2016	0.229517	0.999997	AFUA_3G02520	Afu3G02520	MFS multidrug transporter; putative [Source:UniProtKB/TrEMBL
CADAFUAG00000377	8.65692	-0.198484	1.41675	-0.140098	0.888582	0.999997	AFUA_3G01950	Afu3G01950	Zinc-containing alcohol dehydrogenase; putative [Source:UniProtKB/TrEMBL
CADAFUAG00000378	20.2908	-0.579941	0.950504	-0.61014	0.541769	0.999997	AFUA_3G02360	Afu3G02360	FAD dependent oxidoreductase superfamily [Source:UniProtKB/TrEMBL
CADAFUAG00000379	11.5479	-0.47802	1.24561	-0.383764	0.701153	0.999997	AFUA_3G01130	Afu3G01130	Cell wall protein; putative [Source:UniProtKB/TrEMBL
CADAFUAG00000380	4.19438	0.350572	2.02659	0.172986	0.862662	0.999997	AFUA_3G03450	Afu3G03450	Cytochrome P450 oxidoreductase; putative [Source:UniProtKB/TrEMBL
CADAFUAG00000381	2.48624	0.121525	2.85081	0.0426283	0.965998	0.999997	AFUA_3G02210	Afu3G02210	C6 transcription factor; putative [Source:UniProtKB/TrEMBL
CADAFUAG00000382	0.677217	-1.40004	4.95396	-0.282611	0.777475	NA	AFUA_3G02690	Afu3G02690	Putative uncharacterized protein [Source:UniProtKB/TrEMBL
CADAFUAG00000383	72.9154	-0.700678	0.571556	-1.22591	0.220232	0.999997	AFUA_3G03040	Afu3G03040	Putative uncharacterized protein [Source:UniProtKB/TrEMBL
CADAFUAG00000384	8.48528	-0.527546	1.42932	-0.369089	0.712061	0.999997	AFUA_3G01500	Afu3G01500	Integral membrane protein [Source:UniProtKB/TrEMBL
CADAFUAG00000385	1.7487	-2.03396	3.21814	-0.632029	0.527368	0.999997	AFUA_3G01460	Afu3G01460	Salicylate hydroxylase; putative [Source:UniProtKB/TrEMBL
CADAFUAG00000386	36.2541	0.191745	0.745016	0.257371	0.796892	0.999997	AFUA_3G02790	Afu3G02790	Amidohydrolase family protein [Source:UniProtKB/TrEMBL
CADAFUAG00000387	16.4338	0.858661	1.09154	0.786654	0.431484	0.999997	AFUA_3G02980	Afu3G02980	Metalloreductase Fre8; putative [Source:UniProtKB/TrEMBL
CADAFUAG00000388	11136.3	0.187746	0.308331	0.608911	0.542583	0.999997	AFUA_3G00720	Afu3G00720	DUF500 and UBA/TS-N domain protein [Source:UniProtKB/TrEMBL
CADAFUAG00000389	496.649	-0.753551	0.350612	-2.14924	0.0316152	0.999997	AFUA_3G03550	Afu3G03550	Putative uncharacterized protein [Source:UniProtKB/TrEMBL
CADAFUAG00000390	113.924	-0.12621	0.477614	-0.264252	0.791586	0.999997	AFUA_3G03600	Afu3G03600	Carboxylesterase; putative [Source:UniProtKB/TrEMBL
CADAFUAG00000391	65.6394	-0.821342	0.596974	-1.37584	0.16887	0.999997	AFUA_3G01340	Afu3G01340	DUF636 domain protein [Source:UniProtKB/TrEMBL
CADAFUAG00000392	1614.06	-0.433693	0.340843	-1.27241	0.203227	0.999997	AFUA_3G04130	Afu3G04130	Glutamyl-tRNA(Gln) amidotransferase subunit A; mitochondrial [Source:UniProtKB/Swiss-Prot
CADAFUAG00000393	122.626	0.248768	0.518709	0.479591	0.631518	0.999997	AFUA_3G03670	Afu3G03670	ABC multidrug transporter; putative [Source:UniProtKB/TrEMBL
CADAFUAG00000394	308.11	-0.183346	0.364921	-0.502427	0.615367	0.999997	AFUA_3G03030	Afu3G03030	Catechol dioxygenase; putative [Source:UniProtKB/TrEMBL
CADAFUAG00000395	16.5604	0.159991	1.06033	0.150888	0.880064	0.999997	AFUA_3G04180	Afu3G04180	C2H2 finger domain protein; putative [Source:UniProtKB/TrEMBL
CADAFUAG00000396	1741.65	0.441195	0.300091	1.47021	0.141506	0.999997	AFUA_3G00130	Afu3G00130	Putative uncharacterized protein [Source:UniProtKB/TrEMBL
CADAFUAG00000397	697.658	0.280106	0.334034	0.838554	0.40172	0.999997	AFUA_3G02070	Afu3G02070	C2H2 transcription factor; putative [Source:UniProtKB/TrEMBL
CADAFUAG00000398	1.39995	-1.36906	3.31894	-0.4125	0.679973	0.999997	AFUA_3G00780	Afu3G00780	cAMP receptor (Car4); putative [Source:UniProtKB/TrEMBL
CADAFUAG00000399	8682.67	-0.535621	0.294648	-1.81783	0.0690899	0.999997	AFUA_3G03330	Afu3G03330	Mitochondrial enoyl reductase; putative [Source:UniProtKB/TrEMBL
CADAFUAG00000400	70.817	0.901099	0.630998	1.42805	0.153276	0.999997	AFUA_6G03670	Afu6G03670	Biotin synthase; putative [Source:UniProtKB/TrEMBL
CADAFUAG00000401	254.062	-0.428408	0.422707	-1.01349	0.310828	0.999997	AFUA_6G02680	Afu6G02680	Ankyrin repeat and BTB/POZ domain protein [Source:UniProtKB/TrEMBL
CADAFUAG00000402	28.6632	0.499959	0.834523	0.599095	0.54911	0.999997	AFUA_6G02360	Afu6G02360	Putative uncharacterized protein [Source:UniProtKB/TrEMBL
CADAFUAG00000403	43.0121	-0.271204	0.702754	-0.385916	0.699559	0.999997	AFUA_6G03320	Afu6G03320	MFS multidrug transporter; putative [Source:UniProtKB/TrEMBL
CADAFUAG00000404	95.7859	0.843965	0.555135	1.52029	0.128439	0.999997	AFUA_6G05260	Afu6G05260	GPI ethanolamine phosphate transferase 2 [Source:UniProtKB/Swiss-Prot
CADAFUAG00000405	47.9944	-0.229073	0.658669	-0.347782	0.728004	0.999997	AFUA_6G02780	Afu6G02780	Acyl-protein thioesterase 1 [Source:UniProtKB/Swiss-Prot
CADAFUAG00000406	194.457	1.01302	0.438348	2.31099	0.0208335	0.999997	AFUA_6G03580	Afu6G03580	mRNA-nucleus export ATPase (Elf1); putative [Source:UniProtKB/TrEMBL
CADAFUAG00000407	424.136	0.317676	0.345089	0.92056	0.35728	0.999997	AFUA_6G03770	Afu6G03770	Oxidoreductase (Msc7); putative [Source:UniProtKB/TrEMBL
CADAFUAG00000408	18.223	0.203673	1.01258	0.201143	0.840587	0.999997	AFUA_6G02580	Afu6G02580	Putative uncharacterized protein [Source:UniProtKB/TrEMBL
CADAFUAG00000409	13.2658	-0.330481	1.15982	-0.284941	0.77569	0.999997	AFUA_6G02790	Afu6G02790	Putative uncharacterized protein [Source:UniProtKB/TrEMBL
CADAFUAG00000410	47.1592	0.162031	0.689957	0.234842	0.814331	0.999997	AFUA_6G04240	Afu6G04240	PAP2 domain protein [Source:UniProtKB/TrEMBL
CADAFUAG00000411	260.021	-0.924602	0.389381	-2.37454	0.0175708	0.999997	AFUA_6G03260	Afu6G03260	Aspartic endopeptidase (AP1); putative [Source:UniProtKB/TrEMBL
CADAFUAG00000412	88.5635	0.0848734	0.525059	0.161645	0.871585	0.999997	AFUA_6G04780	Afu6G04780	Vacuolar protein sorting 55 superfamily [Source:UniProtKB/TrEMBL
CADAFUAG00000413	123.519	0.221887	0.467822	0.474297	0.635288	0.999997	AFUA_6G02670	Afu6G02670	G2-specific protein kinase NimA; putative [Source:UniProtKB/TrEMBL
CADAFUAG00000414	24.9398	-0.28969	0.868474	-0.333562	0.73871	0.999997	AFUA_6G02400	Afu6G02400	MFS drug efflux pump; putative [Source:UniProtKB/TrEMBL
CADAFUAG00000415	56.6864	-0.178737	0.620404	-0.288097	0.773272	0.999997	AFUA_6G05050	Afu6G05050	DUF410 domain protein [Source:UniProtKB/TrEMBL
CADAFUAG00000416	194.912	-0.0414345	0.409598	-0.101159	0.919424	0.999997	AFUA_6G05000	Afu6G05000	Glycosyl hydrolases family 32 superfamily [Source:UniProtKB/TrEMBL
CADAFUAG00000417	2.91122	-2.08172	2.39811	-0.868069	0.385357	0.999997	AFUA_6G02980	Afu6G02980	Probable exopolygalacturonase X [Source:UniProtKB/Swiss-Prot
CADAFUAG00000418	41.9487	0.221678	0.75014	0.295516	0.7676	0.999997	AFUA_6G04500	Afu6G04500	Snf1 kinase complex beta-subunit Gal83; putative [Source:UniProtKB/TrEMBL
CADAFUAG00000419	94.4851	0.137381	0.554785	0.247629	0.804422	0.999997	AFUA_6G03820	Afu6G03820	Nascent polypeptide-associated complex subunit alpha [Source:UniProtKB/Swiss-Prot
CADAFUAG00000420	485.815	0.105085	0.337942	0.310955	0.755834	0.999997	AFUA_6G04390	Afu6G04390	E3 ubiquitin-protein ligase bre1 [Source:UniProtKB/Swiss-Prot
CADAFUAG00000421	5.06848	1.4392	1.96568	0.732163	0.464069	0.999997	AFUA_6G01860	Afu6G01860	MFS lactose permease; putative [Source:UniProtKB/TrEMBL
CADAFUAG00000422	3392.78	-0.0761269	0.323024	-0.23567	0.813689	0.999997	AFUA_6G03060	Afu6G03060	MFS monosaccharide transporter; putative [Source:UniProtKB/TrEMBL
CADAFUAG00000423	1870.02	-0.622844	0.341107	-1.82595	0.0678574	0.999997	AFUA_6G04470	Afu6G04470	Putative uncharacterized protein [Source:UniProtKB/TrEMBL
CADAFUAG00000424	154.999	-0.14435	0.442316	-0.32635	0.74416	0.999997	AFUA_6G05290	Afu6G05290	Exocyst complex component Sec15; putative [Source:UniProtKB/TrEMBL
CADAFUAG00000425	3.37077	0.699273	2.39392	0.292103	0.770208	0.999997	AFUA_6G03200	Afu6G03200	Solute symporter family transporter [Source:UniProtKB/TrEMBL
CADAFUAG00000426	806.95	0.928035	0.330299	2.80969	0.00495899	0.663411	AFUA_6G04880	Afu6G04880	Serine-rich protein; putative [Source:UniProtKB/TrEMBL
CADAFUAG00000427	214.789	0.228765	0.407454	0.56145	0.574491	0.999997	AFUA_6G02260	Afu6G02260	Putative uncharacterized protein [Source:UniProtKB/TrEMBL
CADAFUAG00000428	106.867	0.230108	0.490976	0.468675	0.639302	0.999997	AFUA_6G03930	Afu6G03930	Putative uncharacterized protein [Source:UniProtKB/TrEMBL
CADAFUAG00000429	23.1001	-0.158844	0.902011	-0.1761	0.860215	0.999997	AFUA_6G01905	Afu6G01905	Putative uncharacterized protein [Source:UniProtKB/TrEMBL
CADAFUAG00000430	112.416	0.00250367	0.491205	0.005097	0.995933	0.999997	AFUA_6G04060	Afu6G04060	Putative uncharacterized protein [Source:UniProtKB/TrEMBL
CADAFUAG00000431	23.3216	0.314858	0.941096	0.334565	0.737953	0.999997	AFUA_6G04410	Afu6G04410	DUF1183 domain protein [Source:UniProtKB/TrEMBL
CADAFUAG00000432	10.8602	-0.186241	1.27769	-0.145763	0.884108	0.999997	AFUA_6G05220	Afu6G05220	BET3 family protein [Source:UniProtKB/TrEMBL
CADAFUAG00000433	15.7165	0.38921	1.09512	0.355405	0.722286	0.999997	AFUA_6G01850	Afu6G01850	Putative uncharacterized protein [Source:UniProtKB/TrEMBL
CADAFUAG00000434	54.7078	-0.941992	0.619916	-1.51955	0.128625	0.999997	AFUA_6G02560	Afu6G02560	Alpha-galactosidase; putative [Source:UniProtKB/TrEMBL
CADAFUAG00000435	29.6853	-0.325409	0.803713	-0.404882	0.685564	0.999997	AFUA_6G03090	Afu6G03090	Cytochrome P450 alkane hydroxylase; putative [Source:UniProtKB/TrEMBL
CADAFUAG00000436	34.688	-0.0499356	0.755373	-0.0661072	0.947292	0.999997	AFUA_6G03780	Afu6G03780	Putative uncharacterized protein [Source:UniProtKB/TrEMBL
CADAFUAG00000437	186.202	-0.210366	0.420203	-0.500629	0.616632	0.999997	AFUA_6G03430	Afu6G03430	C6 finger domain protein; putative [Source:UniProtKB/TrEMBL
CADAFUAG00000438	46.9498	-0.683661	0.664318	-1.02912	0.303424	0.999997	AFUA_6G04970	Afu6G04970	Phosphoserine aminotransferase [Source:UniProtKB/TrEMBL
CADAFUAG00000439	77.2893	0.0125487	0.551616	0.0227491	0.98185	0.999997	AFUA_6G02730	Afu6G02730	MFS transporter; putative [Source:UniProtKB/TrEMBL
CADAFUAG00000440	57.8325	0.17768	0.620519	0.286341	0.774617	0.999997	AFUA_6G02510	Afu6G02510	Chitin biosynthesis protein (Chs5); putative [Source:UniProtKB/TrEMBL
CADAFUAG00000441	42.7674	0.324254	0.714442	0.453856	0.649932	0.999997	AFUA_6G02810	Afu6G02810	Ctr copper transporter; putative [Source:UniProtKB/TrEMBL
CADAFUAG00000442	212.722	-0.484544	0.403026	-1.20226	0.229261	0.999997	AFUA_6G04220	Afu6G04220	Putative uncharacterized protein [Source:UniProtKB/TrEMBL
CADAFUAG00000443	176.8	0.453416	0.428783	1.05745	0.290307	0.999997	AFUA_6G04520	Afu6G04520	SET domain protein [Source:UniProtKB/TrEMBL
CADAFUAG00000444	99.8458	-0.454237	0.500616	-0.907356	0.364218	0.999997	AFUA_6G05080	Afu6G05080	ABC transporter; putative [Source:UniProtKB/TrEMBL
CADAFUAG00000445	23.9341	-0.286365	0.88465	-0.323705	0.746162	0.999997	AFUA_6G04810	Afu6G04810	Mediator of RNA polymerase II transcription subunit 6 [Source:UniProtKB/Swiss-Prot
CADAFUAG00000446	623.041	-0.502193	0.336515	-1.49234	0.135611	0.999997	AFUA_6G02970	Afu6G02970	UPF0041 domain protein [Source:UniProtKB/TrEMBL
CADAFUAG00000447	3681.25	0.250491	0.289118	0.866397	0.386273	0.999997	AFUA_6G03690	Afu6G03690	Sodium P-type ATPase; putative [Source:UniProtKB/TrEMBL
CADAFUAG00000448	357.526	-0.502586	0.353575	-1.42144	0.155188	0.999997	AFUA_6G04600	Afu6G04600	Putative uncharacterized protein [Source:UniProtKB/TrEMBL
CADAFUAG00000449	121.489	-0.775546	0.479214	-1.61837	0.105583	0.999997	AFUA_6G03390	Afu6G03390	Glutathione S-transferase family protein; putative [Source:UniProtKB/TrEMBL
CADAFUAG00000450	290.149	0.119464	0.372992	0.320285	0.748752	0.999997	AFUA_6G04860	Afu6G04860	MBOAT family protein; putative [Source:UniProtKB/TrEMBL
CADAFUAG00000451	25.0149	0.121743	0.882349	0.137975	0.89026	0.999997	AFUA_6G02150	Afu6G02150	Signal peptide peptidase; putative [Source:UniProtKB/TrEMBL
CADAFUAG00000452	41.0993	0.519669	0.737625	0.704516	0.481112	0.999997	AFUA_6G02550	Afu6G02550	Mitochondrial inner membrane magnesium transporter mrs2 [Source:UniProtKB/Swiss-Prot
CADAFUAG00000453	136.068	2.10281e-05	0.454589	4.62575e-05	0.999963	0.999997	AFUA_6G04340	Afu6G04340	Putative uncharacterized protein [Source:UniProtKB/TrEMBL
CADAFUAG00000454	12.4976	-0.280599	1.20352	-0.233149	0.815646	0.999997	AFUA_6G04350	Afu6G04350	Putative uncharacterized protein [Source:UniProtKB/TrEMBL
CADAFUAG00000455	1997.96	0.467216	0.294181	1.58819	0.112243	0.999997	AFUA_6G03730	Afu6G03730	2-methylcitrate dehydratase; putative [Source:UniProtKB/TrEMBL
CADAFUAG00000456	1403.11	0.046234	0.302489	0.152845	0.878521	0.999997	AFUA_6G02920	Afu6G02920	SNARE protein Snc2; putative [Source:UniProtKB/TrEMBL
CADAFUAG00000457	5200.81	-0.15537	0.307025	-0.50605	0.612822	0.999997	AFUA_6G05120	Afu6G05120	Glycogen synthase kinase (Skp1); putative [Source:UniProtKB/TrEMBL
CADAFUAG00000458	522.941	0.279861	0.345143	0.810857	0.417448	0.999997	AFUA_6G05320	Afu6G05320	Purine nucleoside phosphorylase [Source:UniProtKB/TrEMBL
CADAFUAG00000459	1561.17	-0.476069	0.333181	-1.42886	0.153045	0.999997	AFUA_6G02220	Afu6G02220	MFS toxin efflux pump; putative [Source:UniProtKB/TrEMBL
CADAFUAG00000460	345.588	-0.208618	0.356542	-0.585115	0.55847	0.999997	AFUA_6G03530	Afu6G03530	Glutamine synthetase; putative [Source:UniProtKB/TrEMBL
CADAFUAG00000461	479.488	0.49189	0.339021	1.45091	0.146804	0.999997	AFUA_6G03960	Afu6G03960	COPII coat assembly protein sec16 [Source:UniProtKB/Swiss-Prot
CADAFUAG00000462	665.708	-0.442679	0.339476	-1.30401	0.192231	0.999997	AFUA_6G03470	Afu6G03470	ABC multidrug transporter; putative [Source:UniProtKB/TrEMBL
CADAFUAG00000463	111.415	0.0761559	0.504639	0.150912	0.880045	0.999997	AFUA_6G03830	Afu6G03830	Ribosomal protein L14 [Source:UniProtKB/TrEMBL
CADAFUAG00000464	17.758	0.152736	1.03892	0.147013	0.883122	0.999997	AFUA_6G03160	Afu6G03160	NACHT domain protein [Source:UniProtKB/TrEMBL
CADAFUAG00000465	21.2192	0.377942	1.00809	0.374909	0.707728	0.999997	AFUA_6G04660	Afu6G04660	Centromere protein Cse4; putative [Source:UniProtKB/TrEMBL
CADAFUAG00000466	1.55131	3.41543	3.70227	0.922523	0.356256	0.999997	AFUA_6G03345	Afu6G03345	Putative uncharacterized protein [Source:UniProtKB/TrEMBL
CADAFUAG00000467	1315.51	-1.2034	0.328619	-3.66198	0.000250275	0.0989893	AFUA_6G02535	Afu6G02535	Putative uncharacterized protein [Source:UniProtKB/TrEMBL
CADAFUAG00000468	169.772	-0.283233	0.438547	-0.645843	0.518381	0.999997	AFUA_6G02960	Afu6G02960	NADH-ubiquinone oxidoreductase 105 kDa subunit [Source:UniProtKB/TrEMBL
CADAFUAG00000469	772.35	-0.36768	0.344877	-1.06612	0.28637	0.999997	AFUA_6G03040	Afu6G03040	MFS multidrug transporter; putative [Source:UniProtKB/TrEMBL
CADAFUAG00000470	71535.9	-0.40436	0.305484	-1.32367	0.185614	0.999997	AFUA_6G02280	Afu6G02280	Putative peroxiredoxin pmp20 [Source:UniProtKB/Swiss-Prot
CADAFUAG00000471	71.78	0.322934	0.567411	0.569136	0.569264	0.999997	AFUA_6G02660	Afu6G02660	Putative uncharacterized protein [Source:UniProtKB/TrEMBL
CADAFUAG00000472	995.008	-0.101574	0.331405	-0.306494	0.759228	0.999997	AFUA_6G04680	Afu6G04680	MIPC synthase subunit (SurA); putative [Source:UniProtKB/TrEMBL
CADAFUAG00000473	8.99086	-0.904129	1.39401	-0.648584	0.516607	0.999997	AFUA_6G01980	Afu6G01980	Haemolysin-III family protein [Source:UniProtKB/TrEMBL
CADAFUAG00000474	648.146	-0.227486	0.322512	-0.705356	0.480589	0.999997	AFUA_6G02190	Afu6G02190	Transcriptional activator (PtaC); putative [Source:UniProtKB/TrEMBL
CADAFUAG00000475	1351.32	-0.336003	0.316836	-1.0605	0.288919	0.999997	AFUA_6G02180	Afu6G02180	GNAT family acetyltransferase; putative [Source:UniProtKB/TrEMBL
CADAFUAG00000476	10.0969	0.409356	1.34033	0.305414	0.760051	0.999997	AFUA_6G03140	Afu6G03140	Oligopeptide transporter; putative [Source:UniProtKB/TrEMBL
CADAFUAG00000477	136.777	-0.695357	0.529172	-1.31405	0.188831	0.999997	AFUA_6G03460	Afu6G03460	Putative uncharacterized protein [Source:UniProtKB/TrEMBL
CADAFUAG00000478	7.4286	0.469631	1.5513	0.302733	0.762093	0.999997	AFUA_6G04170	Afu6G04170	Killer toxin sensitivity protein (Iki1); putative [Source:UniProtKB/TrEMBL
CADAFUAG00000479	15.7318	-0.109526	1.08043	-0.101373	0.919254	0.999997	AFUA_6G03870	Afu6G03870	Tetratricopeptide repeat protein [Source:UniProtKB/TrEMBL
CADAFUAG00000480	56.4687	-0.0108914	0.61898	-0.0175957	0.985961	0.999997	AFUA_6G05170	Afu6G05170	Mitochondrial folate carrier protein Flx1; putative [Source:UniProtKB/TrEMBL
CADAFUAG00000481	1190.34	0.295431	0.304626	0.969815	0.332139	0.999997	AFUA_6G05010	Afu6G05010	C6 transcription factor; putative [Source:UniProtKB/TrEMBL
CADAFUAG00000482	373.876	-0.094175	0.351477	-0.267941	0.788745	0.999997	AFUA_6G05174	Afu6G05174	TOM complex component Tom7; putative [Source:UniProtKB/TrEMBL
CADAFUAG00000483	594.399	-0.31073	0.330528	-0.9401	0.347166	0.999997	AFUA_6G02100	Afu6G02100	DUF803 domain protein [Source:UniProtKB/TrEMBL
CADAFUAG00000484	34.5986	-0.813179	0.755691	-1.07607	0.281894	0.999997	AFUA_6G01880	Afu6G01880	Putative uncharacterized protein [Source:UniProtKB/TrEMBL
CADAFUAG00000485	1139.82	-0.228765	0.307547	-0.743838	0.456975	0.999997	AFUA_6G02120	Afu6G02120	Putative uncharacterized protein [Source:UniProtKB/TrEMBL
CADAFUAG00000486	1.63738	-0.873169	3.33286	-0.261988	0.793331	0.999997	AFUA_6G03340	Afu6G03340	Putative uncharacterized protein [Source:UniProtKB/TrEMBL
CADAFUAG00000487	829.711	0.145618	0.323174	0.450588	0.652286	0.999997	AFUA_6G03660	Afu6G03660	Onanonoxo-7-onima-8-eninoihtemlysoneda [Source:UniProtKB/TrEMBL
CADAFUAG00000488	76.3488	0.0212622	0.5776	0.0368113	0.970635	0.999997	AFUA_6G02700	Afu6G02700	Structural maintenance of chromosome complex subunit SmcA [Source:UniProtKB/TrEMBL
CADAFUAG00000489	614.988	-0.0293885	0.325646	-0.0902466	0.928091	0.999997	AFUA_6G04820	Afu6G04820	Para-aminobenzoate synthase PabaA [Source:UniProtKB/TrEMBL
CADAFUAG00000490	100.729	0.52427	0.551316	0.950942	0.341634	0.999997	AFUA_6G04000	Afu6G04000	GTPase activating protein (Tsc2); putative [Source:UniProtKB/TrEMBL
CADAFUAG00000491	1078.57	0.627576	0.336116	1.86714	0.0618822	0.999997	AFUA_6G04570	Afu6G04570	Translation elongation factor eEF-1 subunit gamma; putative [Source:UniProtKB/TrEMBL
CADAFUAG00000492	30.7134	0.958001	0.962583	0.995239	0.31962	0.999997	AFUA_6G04140	Afu6G04140	Putative uncharacterized protein [Source:UniProtKB/TrEMBL
CADAFUAG00000493	155.779	0.392233	0.436798	0.897972	0.3692	0.999997	AFUA_6G04490	Afu6G04490	Camp independent regulatory protein [Source:UniProtKB/TrEMBL
CADAFUAG00000494	78.6213	-0.455241	0.566735	-0.80327	0.421819	0.999997	AFUA_6G05090	Afu6G05090	RNA polymerase II Elongator subunit; putative [Source:UniProtKB/TrEMBL
CADAFUAG00000495	147.476	-0.176608	0.445084	-0.396798	0.691517	0.999997	AFUA_6G03520	Afu6G03520	Short-chain dehydrogenase/reductase family protein; putative [Source:UniProtKB/TrEMBL
CADAFUAG00000496	859.951	0.139169	0.316698	0.439438	0.660344	0.999997	AFUA_6G04230	Afu6G04230	RING finger protein [Source:UniProtKB/TrEMBL
CADAFUAG00000497	29.6288	0.182166	0.81466	0.223609	0.823061	0.999997	AFUA_6G02900	Afu6G02900	Rad21/Rec8 N terminal domain protein [Source:UniProtKB/TrEMBL
CADAFUAG00000498	30.9794	-0.534658	0.787057	-0.679313	0.496939	0.999997	AFUA_6G04430	Afu6G04430	1;2-dihydroxy-3-keto-5-methylthiopentene dioxygenase [Source:UniProtKB/Swiss-Prot
CADAFUAG00000499	21.4973	0.676018	0.954152	0.708501	0.478634	0.999997	AFUA_6G02390	Afu6G02390	Thioesterase family protein [Source:UniProtKB/TrEMBL
CADAFUAG00000500	91.5913	-1.09352	0.518947	-2.10718	0.0351019	0.999997	AFUA_6G01870	Afu6G01870	Putative uncharacterized protein [Source:UniProtKB/TrEMBL
CADAFUAG00000501	121.122	0.957309	0.552628	1.73228	0.0832229	0.999997	AFUA_6G02540	Afu6G02540	Actin associated protein Wsp1; putative [Source:UniProtKB/TrEMBL
CADAFUAG00000502	1232.62	0.17843	0.303915	0.587106	0.557133	0.999997	AFUA_6G02630	Afu6G02630	ATP-dependent RNA helicase sub2 [Source:UniProtKB/Swiss-Prot
CADAFUAG00000503	2268.78	0.504087	0.296208	1.7018	0.0887924	0.999997	AFUA_6G05140	Afu6G05140	Sterol delta 5;6-desaturase ERG3 [Source:UniProtKB/TrEMBL
CADAFUAG00000504	736.189	0.0610146	0.318083	0.19182	0.847883	0.999997	AFUA_6G05210	Afu6G05210	Malate dehydrogenase; NAD-dependent [Source:UniProtKB/TrEMBL
CADAFUAG00000505	59.6854	-0.631797	0.619446	-1.01994	0.307757	0.999997	AFUA_6G04640	Afu6G04640	Hydrolase; alpha/beta fold family; putative [Source:UniProtKB/TrEMBL
CADAFUAG00000506	146.318	-0.819792	0.439054	-1.86718	0.0618767	0.999997	AFUA_6G02800	Afu6G02800	Uncharacterized protein AFUA_6G02800 [Source:UniProtKB/Swiss-Prot
CADAFUAG00000507	21352.1	0.0367237	0.292	0.125766	0.899917	0.999997	AFUA_6G02020	Afu6G02020	G1/S-specific cyclin Pcl5; putative [Source:UniProtKB/TrEMBL
CADAFUAG00000508	6.51993	-2.39399	1.64901	-1.45177	0.146566	0.999997	AFUA_6G03190	Afu6G03190	Putative uncharacterized protein [Source:UniProtKB/TrEMBL
CADAFUAG00000509	153.202	0.233482	0.444025	0.525831	0.599005	0.999997	AFUA_6G04120	Afu6G04120	Short chain dehydrogenase/reductase family protein [Source:UniProtKB/TrEMBL
CADAFUAG00000510	767.921	0.0646564	0.31656	0.204247	0.838161	0.999997	AFUA_6G03940	Afu6G03940	GTPase activating protein (Gyp7); putative [Source:UniProtKB/TrEMBL
CADAFUAG00000511	5423.97	-0.0796798	0.287827	-0.276832	0.781909	0.999997	AFUA_6G02690	Afu6G02690	C2H2 finger domain protein; putative [Source:UniProtKB/TrEMBL
CADAFUAG00000512	63.3012	-0.0972805	0.599026	-0.162398	0.870993	0.999997	AFUA_6G01930	Afu6G01930	MFS transporter Seo1; putative [Source:UniProtKB/TrEMBL
CADAFUAG00000513	13.8975	-0.394001	1.14231	-0.344916	0.730157	0.999997	AFUA_6G03120	Afu6G03120	Putative uncharacterized protein [Source:UniProtKB/TrEMBL
CADAFUAG00000514	79.1647	-0.0346828	0.542657	-0.063913	0.94904	0.999997	AFUA_6G02440	Afu6G02440	60S ribosomal protein L24a [Source:UniProtKB/TrEMBL
CADAFUAG00000515	37.9573	0.0750815	0.729651	0.102901	0.918042	0.999997	AFUA_6G04420	Afu6G04420	Maintenance of mitochondrial morphology protein 1 [Source:UniProtKB/Swiss-Prot
CADAFUAG00000516	35.7463	1.45709	0.838321	1.73811	0.0821923	0.999997	AFUA_6G04070	Afu6G04070	Putative uncharacterized protein [Source:UniProtKB/TrEMBL
CADAFUAG00000517	142.644	-0.113674	0.444907	-0.2555	0.798337	0.999997	AFUA_6G02370	Afu6G02370	ARP2/3 complex 20 kDa subunit (P20-ARC); putative [Source:UniProtKB/TrEMBL
CADAFUAG00000518	1051.96	0.19757	0.32064	0.616174	0.537779	0.999997	AFUA_6G04270	Afu6G04270	MFS sugar transporter; putative [Source:UniProtKB/TrEMBL
CADAFUAG00000519	10.234	-0.78363	1.30042	-0.602598	0.546776	0.999997	AFUA_6G03680	Afu6G03680	Putative uncharacterized protein [Source:UniProtKB/TrEMBL
CADAFUAG00000520	82.031	-0.144616	0.545759	-0.264982	0.791024	0.999997	AFUA_6G02570	Afu6G02570	tRNA (uracil-O(2)-)-methyltransferase [Source:UniProtKB/Swiss-Prot
CADAFUAG00000521	0.32847	1.14964	6.11021	0.18815	0.850759	NA	AFUA_6G02590	Afu6G02590	Protein kinase; putative [Source:UniProtKB/TrEMBL
CADAFUAG00000522	79.6246	0.889607	0.629131	1.41403	0.157354	0.999997	AFUA_6G04730	Afu6G04730	Bifunctional purine biosynthetic protein Ade1; putative [Source:UniProtKB/TrEMBL
CADAFUAG00000523	26.302	1.50698	0.935185	1.61143	0.107086	0.999997	AFUA_6G04260	Afu6G04260	Ribosomal large subunit biogenesis protein MAK16; putative [Source:UniProtKB/TrEMBL
CADAFUAG00000524	5485.49	0.119596	0.286595	0.417297	0.676461	0.999997	AFUA_6G02070	Afu6G02070	Phospholipid-translocating P-type ATPase domain-containing protein [Source:UniProtKB/TrEMBL
CADAFUAG00000525	1219.28	-0.110148	0.303691	-0.362697	0.716831	0.999997	AFUA_6G05350	Afu6G05350	Probable aspartic-type endopeptidase opsB [Source:UniProtKB/Swiss-Prot
CADAFUAG00000526	18.4709	0.0846134	1.00452	0.0842328	0.932871	0.999997	AFUA_6G01820	Afu6G01820	MFS transporter; putative [Source:UniProtKB/TrEMBL
CADAFUAG00000527	5946.48	0.324877	0.284662	1.14127	0.253756	0.999997	AFUA_6G03620	Afu6G03620	FAD/FMN-containing isoamyl alcohol oxidase MreA [Source:UniProtKB/TrEMBL
CADAFUAG00000528	119.143	-0.273639	0.531649	-0.514699	0.606763	0.999997	AFUA_6G05300	Afu6G05300	CCAAT-binding factor complex subunit HapE [Source:UniProtKB/TrEMBL
CADAFUAG00000529	4470.12	0.70175	0.312656	2.24448	0.0248017	0.999997	AFUA_6G04360	Afu6G04360	ABC drug exporter AtrF [Source:UniProtKB/TrEMBL
CADAFUAG00000530	59.6086	1.13953	0.645391	1.76564	0.0774566	0.999997	AFUA_6G02490	Afu6G02490	Aspartate aminotransferase [Source:UniProtKB/TrEMBL
CADAFUAG00000531	1869.37	-0.385422	0.332534	-1.15904	0.246438	0.999997	AFUA_6G04980	Afu6G04980	Cytochrome c mitochondrial import factor (Cyc2); putative [Source:UniProtKB/TrEMBL
CADAFUAG00000532	1.00569	-0.368647	3.89257	-0.0947054	0.924549	NA	AFUA_6G03290	Afu6G03290	Isochorismatase family hydrolase; putative [Source:UniProtKB/TrEMBL
CADAFUAG00000533	13.897	0.543948	1.1592	0.469244	0.638895	0.999997	AFUA_6G05045	Afu6G05045	Putative uncharacterized protein [Source:UniProtKB/TrEMBL
CADAFUAG00000534	17.951	-0.648673	1.00315	-0.646638	0.517866	0.999997	AFUA_6G05060	Afu6G05060	Decapping nuclease rai1 [Source:UniProtKB/Swiss-Prot
CADAFUAG00000535	73.6283	0.339102	0.623532	0.543841	0.586551	0.999997	AFUA_6G05250	Afu6G05250	Putative uncharacterized protein [Source:UniProtKB/TrEMBL
CADAFUAG00000536	11.5281	-1.27644	1.23247	-1.03567	0.300356	0.999997	AFUA_6G03025	Afu6G03025	Putative uncharacterized protein [Source:UniProtKB/TrEMBL
CADAFUAG00000537	1.20285e+06	-0.231122	0.303861	-0.760617	0.446886	0.999997	AFUA_6G04920	Afu6G04920	NAD-dependent formate dehydrogenase AciA/Fdh [Source:UniProtKB/TrEMBL
CADAFUAG00000538	1.90006	0.935453	3.02819	0.308915	0.757386	0.999997	AFUA_6G03370	Afu6G03370	Short-chain dehydrogenase/reductase; putative [Source:UniProtKB/TrEMBL
CADAFUAG00000539	123.398	-0.0540029	0.471244	-0.114596	0.908765	0.999997	AFUA_6G01810	Afu6G01810	Cytochrome P450 oxidoreductase; putative [Source:UniProtKB/TrEMBL
CADAFUAG00000540	210.432	-0.797668	0.426613	-1.86977	0.0615156	0.999997	AFUA_6G02160	Afu6G02160	3' exoribonuclease family protein [Source:UniProtKB/TrEMBL
CADAFUAG00000541	8.71724	0.426085	1.43681	0.29655	0.76681	0.999997	AFUA_6G04450	Afu6G04450	Alpha-1;2-mannosyltransferase (Mnn2); putative [Source:UniProtKB/TrEMBL
CADAFUAG00000542	154.51	-0.0565035	0.441276	-0.128046	0.898113	0.999997	AFUA_6G03252	Afu6G03252	Protein kinase; putative [Source:UniProtKB/TrEMBL
CADAFUAG00000543	57.4229	0.3522	0.619176	0.568821	0.569478	0.999997	AFUA_6G04760	Afu6G04760	UPF0220 domain protein [Source:UniProtKB/TrEMBL
CADAFUAG00000544	103.92	0.0991036	0.543499	0.182344	0.855313	0.999997	AFUA_6G02820	Afu6G02820	Metalloreductase; putative [Source:UniProtKB/TrEMBL
CADAFUAG00000545	213.42	-0.0674386	0.412812	-0.163364	0.870232	0.999997	AFUA_6G04940	Afu6G04940	Cytokinesis protein SepA/Bni1 [Source:UniProtKB/TrEMBL
CADAFUAG00000546	97.3191	0.397479	0.540493	0.7354	0.462096	0.999997	AFUA_6G03860	Afu6G03860	MFS transporter; putative [Source:UniProtKB/TrEMBL
CADAFUAG00000547	30.2303	-0.115469	0.837592	-0.137858	0.890352	0.999997	AFUA_6G02080	Afu6G02080	Putative uncharacterized protein [Source:UniProtKB/TrEMBL
CADAFUAG00000548	180.189	0.150033	0.41884	0.358212	0.720185	0.999997	AFUA_6G04265	Afu6G04265	Putative uncharacterized protein [Source:UniProtKB/TrEMBL
CADAFUAG00000549	929.692	-0.0357505	0.311818	-0.114652	0.908721	0.999997	AFUA_6G01840	Afu6G01840	C6 transcription factor; putative [Source:UniProtKB/TrEMBL
CADAFUAG00000550	7.49987	-0.84472	1.5031	-0.561986	0.574126	0.999997	AFUA_6G03130	Afu6G03130	Putative uncharacterized protein [Source:UniProtKB/TrEMBL
CADAFUAG00000551	78.1254	0.494145	0.603288	0.819086	0.412738	0.999997	AFUA_6G04700	Afu6G04700	Imidazoleglycerol-phosphate dehydratase [Source:UniProtKB/TrEMBL
CADAFUAG00000552	2866.31	0.364073	0.294057	1.2381	0.215679	0.999997	AFUA_6G04300	Afu6G04300	Putative uncharacterized protein [Source:UniProtKB/TrEMBL
CADAFUAG00000553	37.9824	-0.120401	0.774151	-0.155527	0.876406	0.999997	AFUA_6G04150	Afu6G04150	Protein transport protein sec22 [Source:UniProtKB/TrEMBL
CADAFUAG00000554	330.88	0.432029	0.371609	1.16259	0.244996	0.999997	AFUA_6G03540	Afu6G03540	Malate synthase [Source:UniProtKB/TrEMBL
CADAFUAG00000555	78.5575	-0.0803816	0.574842	-0.139832	0.888792	0.999997	AFUA_6G02740	Afu6G02740	Putative uncharacterized protein [Source:UniProtKB/TrEMBL
CADAFUAG00000556	19.4513	-0.072053	0.97502	-0.073899	0.941091	0.999997	AFUA_6G04100	Afu6G04100	Mis6 domain protein [Source:UniProtKB/TrEMBL
CADAFUAG00000557	221.844	-0.141671	0.394606	-0.359018	0.719582	0.999997	AFUA_6G02930	Afu6G02930	Putative uncharacterized protein [Source:UniProtKB/TrEMBL
CADAFUAG00000558	29.4474	0.0762598	0.820639	0.0929274	0.925961	0.999997	AFUA_6G03480	Afu6G03480	Nonribosomal peptide synthase; putative [Source:UniProtKB/TrEMBL
CADAFUAG00000559	54.5906	-0.402349	0.65616	-0.613187	0.539753	0.999997	AFUA_6G02990	Afu6G02990	Short chain dehydrogenase/reductase; putative [Source:UniProtKB/TrEMBL
CADAFUAG00000560	181.773	-0.538698	0.413538	-1.30266	0.192691	0.999997	AFUA_6G02290	Afu6G02290	Putative uncharacterized protein [Source:UniProtKB/TrEMBL
CADAFUAG00000561	2934.76	-0.117068	0.31423	-0.372555	0.70948	0.999997	AFUA_6G02710	Afu6G02710	Lipase; putative [Source:UniProtKB/TrEMBL
CADAFUAG00000562	0.722736	-1.30454	4.8333	-0.269907	0.787232	NA	AFUA_6G03330	Afu6G03330	Putative uncharacterized protein [Source:UniProtKB/TrEMBL
CADAFUAG00000563	11901.6	-0.458248	0.32317	-1.41798	0.156197	0.999997	AFUA_6G03400	Afu6G03400	Putative uncharacterized protein [Source:UniProtKB/TrEMBL
CADAFUAG00000564	137.509	0.0968084	0.486281	0.199079	0.842201	0.999997	AFUA_6G04180	Afu6G04180	Putative uncharacterized protein [Source:UniProtKB/TrEMBL
CADAFUAG00000565	15.5487	2.14735	1.23019	1.74554	0.0808905	0.999997	AFUA_6G02705	Afu6G02705	Putative uncharacterized protein [Source:UniProtKB/TrEMBL
CADAFUAG00000566	152.951	0.586596	0.479221	1.22406	0.220929	0.999997	AFUA_6G05240	Afu6G05240	SUMO ligase SizA; putative [Source:UniProtKB/TrEMBL
CADAFUAG00000567	161.112	0.117395	0.441356	0.265987	0.790249	0.999997	AFUA_6G04990	Afu6G04990	Amino acid transporter; putative [Source:UniProtKB/TrEMBL
CADAFUAG00000568	33.7163	0.533232	0.802829	0.664192	0.506568	0.999997	AFUA_6G02650	Afu6G02650	Putative uncharacterized protein [Source:UniProtKB/TrEMBL
CADAFUAG00000569	21.353	-1.21065	0.943666	-1.28293	0.199518	0.999997	AFUA_6G02210	Afu6G02210	Cytochrome P450 monooxygenase; putative [Source:UniProtKB/TrEMBL
CADAFUAG00000570	54.8949	-0.852385	0.626863	-1.35976	0.173905	0.999997	AFUA_6G03350	Afu6G03350	GNAT family N-acetyltransferase; putative [Source:UniProtKB/TrEMBL
CADAFUAG00000571	442.029	0.0266813	0.357812	0.0745678	0.940559	0.999997	AFUA_6G04830	Afu6G04830	HATPase_c domain protein; putative [Source:UniProtKB/TrEMBL
CADAFUAG00000572	7121.38	0.00456502	0.289294	0.0157799	0.98741	0.999997	AFUA_6G02130	Afu6G02130	Rab geranylgeranyl transferase escort protein; putative [Source:UniProtKB/TrEMBL
CADAFUAG00000573	4578.78	-0.29059	0.295902	-0.982049	0.326076	0.999997
CADAFUAG00000574	51.9447	0.252458	0.658881	0.383162	0.701599	0.999997	AFUA_6G03050	Afu6G03050	Oleate delta-12 desaturase [Source:UniProtKB/TrEMBL
CADAFUAG00000575	78.8302	0.221327	0.54689	0.404702	0.685697	0.999997	AFUA_6G04900	Afu6G04900	Sucrase/ferredoxin-like family protein Fmi1; putative [Source:UniProtKB/TrEMBL
CADAFUAG00000576	275.468	0.495383	0.386642	1.28125	0.200107	0.999997	AFUA_6G03950	Afu6G03950	Phospholipid-translocating P-type ATPase; putative [Source:UniProtKB/TrEMBL
CADAFUAG00000577	218.282	-0.199981	0.395444	-0.505713	0.613058	0.999997	AFUA_6G03080	Afu6G03080	ABC multidrug transporter; putative [Source:UniProtKB/TrEMBL
CADAFUAG00000578	398.197	0.55846	0.35031	1.59419	0.110894	0.999997	AFUA_6G03570	Afu6G03570	Probable beta-glucosidase E [Source:UniProtKB/Swiss-Prot
CADAFUAG00000579	116.318	0.00843757	0.478855	0.0176203	0.985942	0.999997	AFUA_6G01920	Afu6G01920	Xenobiotic compound monooxygenase; DszA family [Source:UniProtKB/TrEMBL
CADAFUAG00000580	70.8115	-0.215648	0.565758	-0.381167	0.70308	0.999997	AFUA_6G05040	Afu6G05040	DNA replication factor C subunit Rfc4; putative [Source:UniProtKB/TrEMBL
CADAFUAG00000581	705.978	-0.150409	0.320994	-0.468572	0.639376	0.999997	AFUA_6G04530	Afu6G04530	Enhancer of polycomb-like protein 1 [Source:UniProtKB/Swiss-Prot
CADAFUAG00000582	6.47442	-2.41958	1.70034	-1.423	0.154737	0.999997	AFUA_6G03490	Afu6G03490	Phenol 2-monooxygenase; putative [Source:UniProtKB/TrEMBL
CADAFUAG00000583	110.097	-0.0195188	0.498078	-0.0391881	0.96874	0.999997	AFUA_6G02340	Afu6G02340	Putative uncharacterized protein [Source:UniProtKB/TrEMBL
CADAFUAG00000584	18.0218	-0.513253	1.01879	-0.503785	0.614412	0.999997	AFUA_6G03500	Afu6G03500	Putative uncharacterized protein [Source:UniProtKB/TrEMBL
CADAFUAG00000585	49.8166	0.502985	0.678554	0.741261	0.458535	0.999997	AFUA_6G05160	Afu6G05160	C2H2 transcription factor (Azf1); putative [Source:UniProtKB/TrEMBL
CADAFUAG00000586	205.464	-0.91563	0.401202	-2.28222	0.0224766	0.999997	AFUA_6G05030	Afu6G05030	Polysaccharide deacetylase family protein [Source:UniProtKB/TrEMBL
CADAFUAG00000587	1163.78	-0.427995	0.306747	-1.39527	0.162934	0.999997	AFUA_6G02950	Afu6G02950	Aromatic ring-opening dioxygenase LigB subunit; putative [Source:UniProtKB/TrEMBL
CADAFUAG00000588	21.1337	0.498715	0.957126	0.521055	0.602329	0.999997	AFUA_6G03630	Afu6G03630	Very-long-chain acyl-CoA synthetase family protein (CefD1); putative [Source:UniProtKB/TrEMBL
CADAFUAG00000589	7.88866	-0.104061	1.4839	-0.0701266	0.944093	0.999997	AFUA_6G01990	Afu6G01990	Pre-rRNA-processing protein ipi1 [Source:UniProtKB/Swiss-Prot
CADAFUAG00000590	94.6204	-1.36298	0.505527	-2.69615	0.00701467	0.769868	AFUA_6G02850	Afu6G02850	C6 finger domain protein; putative [Source:UniProtKB/TrEMBL
CADAFUAG00000591	0.677217	-1.40004	4.95396	-0.282611	0.777475	NA	AFUA_6G03220	Afu6G03220	Putative uncharacterized protein [Source:UniProtKB/TrEMBL
CADAFUAG00000592	100.659	-0.340852	0.496319	-0.68676	0.492234	0.999997	AFUA_6G02760	Afu6G02760	UDP-glucose-4-epimerase; putative [Source:UniProtKB/TrEMBL
CADAFUAG00000593	246.098	-0.123723	0.40391	-0.306312	0.759367	0.999997	AFUA_6G04705	Afu6G04705	Putative uncharacterized protein [Source:UniProtKB/TrEMBL
CADAFUAG00000594	124.971	0.689964	0.471329	1.46387	0.14323	0.999997	AFUA_6G05100	Afu6G05100	6-phosphofructo-2-kinase; putative [Source:UniProtKB/TrEMBL
CADAFUAG00000595	74.4061	-0.306768	0.59761	-0.513324	0.607725	0.999997	AFUA_6G03180	Afu6G03180	Putative uncharacterized protein [Source:UniProtKB/TrEMBL
CADAFUAG00000596	2.73411	-0.614658	2.43296	-0.252638	0.800548	0.999997	AFUA_6G03360	Afu6G03360	ToxD-like zinc binding oxidoreductase; putative [Source:UniProtKB/TrEMBL
CADAFUAG00000597	36.7755	-0.455317	0.754145	-0.603752	0.546008	0.999997	AFUA_6G02350	Afu6G02350	DUF207 domain protein [Source:UniProtKB/TrEMBL
CADAFUAG00000598	89.3845	0.74934	0.533828	1.40371	0.160405	0.999997	AFUA_6G04580	Afu6G04580	NIF domain protein [Source:UniProtKB/TrEMBL
CADAFUAG00000599	85.4592	0.353987	0.541996	0.653116	0.513681	0.999997	AFUA_6G04950	Afu6G04950	Mitochondrial GTPase (Mss1); putative [Source:UniProtKB/TrEMBL
CADAFUAG00000600	1341.6	0.650651	0.302493	2.15096	0.0314793	0.999997	AFUA_6G03990	Afu6G03990	GAS2 domain protein [Source:UniProtKB/TrEMBL
CADAFUAG00000601	373.85	0.0276416	0.35426	0.0780263	0.937807	0.999997	AFUA_6G05270	Afu6G05270	Putative uncharacterized protein [Source:UniProtKB/TrEMBL
CADAFUAG00000602	331.835	0.0909213	0.376161	0.241709	0.809006	0.999997	AFUA_6G02420	Afu6G02420	Ubiquitin conjugating enzyme (UbcM); putative [Source:UniProtKB/TrEMBL
CADAFUAG00000603	68.7567	-0.760272	0.569224	-1.33563	0.181671	0.999997	AFUA_6G03230	Afu6G03230	Cell wall glucanase/allergen F16-like [Source:UniProtKB/TrEMBL
CADAFUAG00000604	12.4516	0.812943	1.23524	0.658126	0.510457	0.999997	AFUA_6G03110	Afu6G03110	C6 transcription factor; putative [Source:UniProtKB/TrEMBL
CADAFUAG00000605	109.313	0.0584144	0.494031	0.11824	0.905877	0.999997	AFUA_6G04250	Afu6G04250	Pheromone-dependent cell cycle arrest protein Far11; putative [Source:UniProtKB/TrEMBL
CADAFUAG00000606	103.581	-0.323046	0.509442	-0.634118	0.526004	0.999997	AFUA_6G03710	Afu6G03710	Amidohydrolase; putative [Source:UniProtKB/TrEMBL
CADAFUAG00000607	10573.3	0.201746	0.294048	0.686098	0.492652	0.999997	AFUA_6G04740	Afu6G04740	Actin Act1 [Source:UniProtKB/TrEMBL
CADAFUAG00000608	267.194	0.590781	0.398886	1.48108	0.138586	0.999997	AFUA_6G05310	Afu6G05310	Nucleolus protein required for cell viability; putative [Source:UniProtKB/TrEMBL
CADAFUAG00000609	85.5295	-0.396476	0.551262	-0.719214	0.472009	0.999997	AFUA_6G02030	Afu6G02030	Aminotransferase; putative [Source:UniProtKB/TrEMBL
CADAFUAG00000610	187.54	-0.101304	0.416853	-0.24302	0.80799	0.999997	AFUA_6G04040	Afu6G04040	Peroxisomal D3;D2-enoyl-CoA isomerase [Source:UniProtKB/TrEMBL
CADAFUAG00000611	0	NA	NA	NA	NA	NA
CADAFUAG00000612	313.612	-0.023544	0.365441	-0.0644263	0.948631	0.999997	AFUA_6G04790	Afu6G04790	Proteasome subunit alpha type [Source:UniProtKB/TrEMBL
CADAFUAG00000613	3119.1	-0.346015	0.290648	-1.19049	0.233853	0.999997	AFUA_6G01940	Afu6G01940	Dienelactone hydrolase family protein [Source:UniProtKB/TrEMBL
CADAFUAG00000614	25.424	0.262868	0.88896	0.295703	0.767457	0.999997	AFUA_6G02242	Afu6G02242	Serine/threonine-protein kinase; putative [Source:UniProtKB/TrEMBL
CADAFUAG00000615	8.4798	0.368692	1.4528	0.25378	0.799666	0.999997	AFUA_6G03920	Afu6G03920	Iron-sulfur cluster-binding protein; putative [Source:UniProtKB/TrEMBL
CADAFUAG00000616	233.931	0.709989	0.425041	1.6704	0.09484	0.999997	AFUA_6G02910	Afu6G02910	Acetylglutamate kinase; putative [Source:UniProtKB/TrEMBL
CADAFUAG00000617	441.089	0.475653	0.36838	1.2912	0.196633	0.999997	AFUA_6G05020	Afu6G05020	Acetamidase [Source:UniProtKB/TrEMBL
CADAFUAG00000618	257.853	0.141083	0.381884	0.36944	0.7118	0.999997	AFUA_6G02000	Afu6G02000	NCS1 allantoate transporter [Source:UniProtKB/TrEMBL
CADAFUAG00000619	356.365	-0.0127585	0.359962	-0.035444	0.971726	0.999997	AFUA_6G04190	Afu6G04190	Putative uncharacterized protein [Source:UniProtKB/TrEMBL
CADAFUAG00000620	49.3478	0.252093	0.656607	0.383932	0.701029	0.999997	AFUA_6G02480	Afu6G02480	Esterase; putative [Source:UniProtKB/TrEMBL
CADAFUAG00000621	0.611421	2.07465	5.24895	0.395251	0.692657	NA	AFUA_6G02845	Afu6G02845	Ethanolamine utilization protein (EutQ); putative [Source:UniProtKB/TrEMBL
CADAFUAG00000622	120.199	0.143382	0.471065	0.304379	0.760839	0.999997	AFUA_6G03790	Afu6G03790	Putative uncharacterized protein [Source:UniProtKB/TrEMBL
CADAFUAG00000623	83.5226	-0.195135	0.5772	-0.338072	0.735309	0.999997	AFUA_6G03700	Afu6G03700	Putative uncharacterized protein [Source:UniProtKB/TrEMBL
CADAFUAG00000624	707.402	-0.386142	0.3229	-1.19586	0.231753	0.999997	AFUA_6G02870	Afu6G02870	Putative uncharacterized protein [Source:UniProtKB/TrEMBL
CADAFUAG00000625	14.3466	0.40465	1.15993	0.348856	0.727197	0.999997	AFUA_6G04720	Afu6G04720	Mitochondrial mRNA processing protein PET127; putative [Source:UniProtKB/TrEMBL
CADAFUAG00000626	1612.52	0.32644	0.301082	1.08422	0.278265	0.999997	AFUA_6G04310	Afu6G04310	mRNA binding protein Pumilio 2; putative [Source:UniProtKB/TrEMBL
CADAFUAG00000627	55.5232	-0.089655	0.668878	-0.134038	0.893373	0.999997	AFUA_6G05190	Afu6G05190	Putative uncharacterized protein [Source:UniProtKB/TrEMBL
CADAFUAG00000628	76.5095	-0.731603	0.546525	-1.33864	0.180686	0.999997	AFUA_6G02050	Afu6G02050	Putative uncharacterized protein [Source:UniProtKB/TrEMBL
CADAFUAG00000629	151.209	-0.102439	0.439364	-0.233154	0.815642	0.999997	AFUA_6G03070	Afu6G03070	Extracellular dioxygenase; putative [Source:UniProtKB/TrEMBL
CADAFUAG00000630	75.0218	0.822593	0.60107	1.36855	0.171141	0.999997	AFUA_6G03890	Afu6G03890	Catalase A [Source:UniProtKB/Swiss-Prot
CADAFUAG00000631	156.689	0.279675	0.444033	0.629853	0.528791	0.999997	AFUA_6G02830	Afu6G02830	Putative uncharacterized protein [Source:UniProtKB/TrEMBL
CADAFUAG00000632	22.1053	-0.790277	0.911651	-0.866864	0.386017	0.999997	AFUA_6G04850	Afu6G04850	Short chain dehydrogenase/reductase family protein [Source:UniProtKB/TrEMBL
CADAFUAG00000633	0.939891	2.69082	4.44503	0.605353	0.544944	NA	AFUA_6G04370	Afu6G04370	Putative uncharacterized protein [Source:UniProtKB/TrEMBL
CADAFUAG00000634	13.8866	0.77064	1.18851	0.64841	0.51672	0.999997	AFUA_6G04440	Afu6G04440	Mitochondrial translation optimization protein (Mto1); putative [Source:UniProtKB/TrEMBL
CADAFUAG00000635	4.76576	-0.974917	1.86588	-0.522496	0.601325	0.999997	AFUA_6G03800	Afu6G03800	Putative uncharacterized protein [Source:UniProtKB/TrEMBL
CADAFUAG00000636	131.109	0.0765443	0.460809	0.166109	0.868071	0.999997	AFUA_6G04330	Afu6G04330	DEAH-box RNA helicase (Dhr1); putative [Source:UniProtKB/TrEMBL
CADAFUAG00000637	0	NA	NA	NA	NA	NA	AFUA_6G03550	Afu6G03550	Putative uncharacterized protein [Source:UniProtKB/TrEMBL
CADAFUAG00000638	71.6528	0.689105	0.576284	1.19577	0.231785	0.999997	AFUA_6G03910	Afu6G03910	Integral membrane protein; Mpv17/PMP22 family; putative [Source:UniProtKB/TrEMBL
CADAFUAG00000639	133.141	0.0504519	0.459298	0.109846	0.912532	0.999997	AFUA_6G03850	Afu6G03850	Signal sequence receptor alpha subunit; putative [Source:UniProtKB/TrEMBL
CADAFUAG00000640	6379.1	0.425678	0.283595	1.501	0.133354	0.999997	AFUA_6G02330	Afu6G02330	C6 transcription factor; putative [Source:UniProtKB/TrEMBL
CADAFUAG00000641	22.4936	0.000380245	0.917136	0.0004146	0.999669	0.999997	AFUA_6G02640	Afu6G02640	Putative uncharacterized protein [Source:UniProtKB/TrEMBL
CADAFUAG00000642	4258.43	0.0711536	0.291045	0.244476	0.806862	0.999997	AFUA_6G04910	Afu6G04910	Leucyl-tRNA synthetase [Source:UniProtKB/TrEMBL
CADAFUAG00000643	1402.25	-0.119796	0.300881	-0.39815	0.69052	0.999997	AFUA_6G02530	Afu6G02530	DNA repair protein RAD1; putative [Source:UniProtKB/TrEMBL
CADAFUAG00000644	24.2523	0.268442	0.927798	0.289332	0.772327	0.999997	AFUA_6G01800	Afu6G01800	Endoglucanase; putative [Source:UniProtKB/TrEMBL
CADAFUAG00000645	692.233	0.237008	0.320737	0.738948	0.459938	0.999997	AFUA_6G04710	Afu6G04710	Putative uncharacterized protein [Source:UniProtKB/TrEMBL
CADAFUAG00000646	470.73	0.252689	0.343331	0.735992	0.461735	0.999997	AFUA_6G03750	Afu6G03750	Amidophosphoribosyltransferase [Source:UniProtKB/TrEMBL
CADAFUAG00000647	44.9774	-0.00176739	0.698787	-0.00252922	0.997982	0.999997	AFUA_6G03970	Afu6G03970	Cell cycle checkpoint protein (Hus1); putative [Source:UniProtKB/TrEMBL
CADAFUAG00000648	9.08626	-0.0827595	1.41035	-0.05868	0.953207	0.999997	AFUA_6G03240	Afu6G03240	Putative uncharacterized protein [Source:UniProtKB/TrEMBL
CADAFUAG00000649	87.5074	0.148087	0.525331	0.281893	0.778026	0.999997	AFUA_6G02940	Afu6G02940	Chitin synthase activator (Chs3); putative [Source:UniProtKB/TrEMBL
CADAFUAG00000650	400.38	0.126024	0.356183	0.353819	0.723474	0.999997	AFUA_6G03640	Afu6G03640	Aminotransferase; putative [Source:UniProtKB/TrEMBL
CADAFUAG00000651	80.9001	-0.585349	0.538884	-1.08622	0.27738	0.999997	AFUA_6G05200	Afu6G05200	60S ribosomal protein L28 [Source:UniProtKB/TrEMBL
CADAFUAG00000652	268.338	-0.0682969	0.384394	-0.177674	0.858979	0.999997	AFUA_6G04210	Afu6G04210	Mannosyl-oligosaccharide glucosidase; putative [Source:UniProtKB/TrEMBL
CADAFUAG00000653	153.897	-0.112459	0.437144	-0.257259	0.796979	0.999997	AFUA_6G05340	Afu6G05340	Tryptophanyl-tRNA synthetase; putative [Source:UniProtKB/TrEMBL
CADAFUAG00000654	216.589	-0.239913	0.398686	-0.60176	0.547334	0.999997	AFUA_6G04030	Afu6G04030	Putative uncharacterized protein [Source:UniProtKB/TrEMBL
CADAFUAG00000655	795.887	0.676886	0.32391	2.08973	0.0366418	0.999997	AFUA_6G02620	Afu6G02620	2-dehydropantoate 2-reductase; putative [Source:UniProtKB/TrEMBL
CADAFUAG00000656	153.896	0.53963	0.475809	1.13413	0.256739	0.999997	AFUA_6G04010	Afu6G04010	Chromosome segregation protein Cse1; putative [Source:UniProtKB/TrEMBL
CADAFUAG00000657	395.358	-0.201586	0.353498	-0.570261	0.568501	0.999997	AFUA_6G04200	Afu6G04200	Putative uncharacterized protein [Source:UniProtKB/TrEMBL
CADAFUAG00000658	325.778	-0.599929	0.406249	-1.47675	0.139742	0.999997	AFUA_6G04080	Afu6G04080	Putative uncharacterized protein [Source:UniProtKB/TrEMBL
CADAFUAG00000659	925.654	-0.24626	0.310564	-0.792943	0.427811	0.999997	AFUA_6G02040	Afu6G02040	Putative uncharacterized protein [Source:UniProtKB/TrEMBL
CADAFUAG00000660	7.66603	0.533622	1.53904	0.346724	0.728799	0.999997	AFUA_6G04630	Afu6G04630	60S ribosomal subunit assembly/export protein loc1 [Source:UniProtKB/Swiss-Prot
CADAFUAG00000661	44.0413	0.194803	0.697499	0.279289	0.780023	0.999997	AFUA_6G02515	Afu6G02515	Putative uncharacterized protein [Source:UniProtKB/TrEMBL
CADAFUAG00000662	7.83767	0.993125	1.56363	0.635142	0.525336	0.999997	AFUA_6G01960	Afu6G01960	C6 finger domain protein; putative [Source:UniProtKB/TrEMBL
CADAFUAG00000663	35.4612	0.0687119	0.761408	0.0902432	0.928094	0.999997	AFUA_6G02300	Afu6G02300	Serine/threonine protein kinase (Kcc4); putative [Source:UniProtKB/TrEMBL
CADAFUAG00000664	131.953	-0.436516	0.460479	-0.947961	0.343149	0.999997	AFUA_6G02750	Afu6G02750	Nascent polypeptide-associated complex subunit beta [Source:UniProtKB/Swiss-Prot
CADAFUAG00000665	291.09	0.116942	0.370572	0.315571	0.752328	0.999997	AFUA_6G02860	Afu6G02860	Isocitrate lyase [Source:UniProtKB/TrEMBL
CADAFUAG00000666	31.7055	0.500331	0.796889	0.627856	0.530099	0.999997	AFUA_6G02770	Afu6G02770	Short-chain dehydrogenase/reductase family protein; putative [Source:UniProtKB/TrEMBL
CADAFUAG00000667	108.481	0.0150993	0.501397	0.0301145	0.975976	0.999997	AFUA_6G02170	Afu6G02170	Metalloreductase transmembrane component; putative [Source:UniProtKB/TrEMBL
CADAFUAG00000668	0	NA	NA	NA	NA	NA	AFUA_6G03310	Afu6G03310	Putative uncharacterized protein [Source:UniProtKB/TrEMBL
CADAFUAG00000669	0.394266	-2.81358	5.94816	-0.473017	0.636201	NA	AFUA_6G03280	Afu6G03280	Swollenin; putative [Source:UniProtKB/TrEMBL
CADAFUAG00000670	96.1624	-0.689291	0.532464	-1.29453	0.195483	0.999997	AFUA_6G04620	Afu6G04620	NADH-ubiquinone oxidoreductase B14 subunit; putative [Source:UniProtKB/TrEMBL
CADAFUAG00000671	651.157	0.543054	0.327347	1.65896	0.0971246	0.999997	AFUA_6G02270	Afu6G02270	Ribonuclease P complex subunit Pop1; putative [Source:UniProtKB/TrEMBL
CADAFUAG00000672	5.94805	0.464806	1.74516	0.26634	0.789977	0.999997	AFUA_6G03720	Afu6G03720	MFS allantoate transporter; putative [Source:UniProtKB/TrEMBL
CADAFUAG00000673	442.741	-1.36089	0.400874	-3.39482	0.00068675	0.215426	AFUA_6G03510	Afu6G03510	Flavin containing polyamine oxidase; putative [Source:UniProtKB/TrEMBL
CADAFUAG00000674	51.9053	0.0438475	0.639449	0.0685707	0.945331	0.999997	AFUA_6G02600	Afu6G02600	Phosphoglycerate mutase family protein [Source:UniProtKB/TrEMBL
CADAFUAG00000675	111.904	-0.423575	0.485418	-0.872598	0.382882	0.999997	AFUA_6G04320	Afu6G04320	Pre-mRNA-splicing factor cwc21 [Source:UniProtKB/Swiss-Prot
CADAFUAG00000676	116.782	0.0397341	0.486713	0.0816377	0.934935	0.999997	AFUA_6G04560	Afu6G04560	37S ribosomal protein S9 [Source:UniProtKB/TrEMBL
CADAFUAG00000677	12598.9	-0.414492	0.324597	-1.27695	0.201621	0.999997	AFUA_6G04750	Afu6G04750	Hsp70 nucleotide exchange factor fes1 [Source:UniProtKB/Swiss-Prot
CADAFUAG00000678	30.8719	0.179686	0.80256	0.223891	0.822842	0.999997	AFUA_6G04770	Afu6G04770	Putative uncharacterized protein [Source:UniProtKB/TrEMBL
CADAFUAG00000679	29.1144	-0.53124	0.812176	-0.654094	0.513051	0.999997	AFUA_6G04690	Afu6G04690	Putative uncharacterized protein [Source:UniProtKB/TrEMBL
CADAFUAG00000680	97.4333	1.09097	0.523921	2.08232	0.0373128	0.999997	AFUA_6G03560	Afu6G03560	IgE-binding protein; putative [Source:UniProtKB/TrEMBL
CADAFUAG00000681	283.749	0.501084	0.408589	1.22638	0.220058	0.999997	AFUA_6G05110	Afu6G05110	Mitochondrial import receptor subunit (Tom40); putative [Source:UniProtKB/TrEMBL
CADAFUAG00000682	4023.6	0.198598	0.287941	0.689717	0.490372	0.999997	AFUA_6G02470	Afu6G02470	Fumarate hydratase; putative [Source:UniProtKB/TrEMBL
CADAFUAG00000683	110.291	-0.943913	0.508384	-1.85669	0.0633547	0.999997	AFUA_6G04960	Afu6G04960	Ankyrin repeat protein [Source:UniProtKB/TrEMBL
CADAFUAG00000684	55.3982	-0.403672	0.631789	-0.638935	0.522865	0.999997	AFUA_6G04460	Afu6G04460	Phosphatidyl synthase [Source:UniProtKB/TrEMBL
CADAFUAG00000685	2.36012	-0.99616	2.61747	-0.380582	0.703513	0.999997	AFUA_6G03880	Afu6G03880	Putative uncharacterized protein [Source:UniProtKB/TrEMBL
CADAFUAG00000686	3335.46	0.0440072	0.291863	0.15078	0.880149	0.999997	AFUA_6G02230	Afu6G02230	Glucokinase GlkA; putative [Source:UniProtKB/TrEMBL
CADAFUAG00000687	1711.11	-0.117184	0.296535	-0.395178	0.692711	0.999997	AFUA_6G03810	Afu6G03810	ATP synthase D chain; mitochondrial; putative [Source:UniProtKB/TrEMBL
CADAFUAG00000688	2.18848	-2.36973	2.74735	-0.862553	0.388383	0.999997	AFUA_6G03210	Afu6G03210	Conidiation-specific protein (Con-10); putative [Source:UniProtKB/TrEMBL
CADAFUAG00000689	443.365	0.145489	0.349178	0.416661	0.676926	0.999997	AFUA_6G02380	Afu6G02380	Ubiquitin carboxyl-terminal hydrolase [Source:UniProtKB/TrEMBL
CADAFUAG00000690	648.05	0.646467	0.334501	1.93263	0.0532816	0.999997	AFUA_6G03600	Afu6G03600	Integral membrane protein (Pth11); putative [Source:UniProtKB/TrEMBL
CADAFUAG00000691	35.1931	0.203521	0.76056	0.267594	0.789012	0.999997	AFUA_6G03380	Afu6G03380	Putative uncharacterized protein [Source:UniProtKB/TrEMBL
CADAFUAG00000692	4202.66	-0.512241	0.318209	-1.60976	0.10745	0.999997	AFUA_6G02010	Afu6G02010	Putative uncharacterized protein [Source:UniProtKB/TrEMBL
CADAFUAG00000693	89.9195	0.691162	0.563074	1.22748	0.219642	0.999997	AFUA_6G04110	Afu6G04110	CLPTM1 domain protein [Source:UniProtKB/TrEMBL
CADAFUAG00000694	37.6491	-0.00982862	0.734079	-0.013389	0.989317	0.999997	AFUA_6G04510	Afu6G04510	Probable tRNA threonylcarbamoyladenosine biosynthesis protein kae1 [Source:UniProtKB/Swiss-Prot
CADAFUAG00000695	10.4204	-0.0422735	1.31393	-0.0321733	0.974334	0.999997	AFUA_6G04610	Afu6G04610	DNA-directed RNA polymerase I and III 14 kDa polypeptide [Source:UniProtKB/TrEMBL
CADAFUAG00000696	540.162	-0.0247057	0.338289	-0.0730313	0.941781	0.999997	AFUA_6G05150	Afu6G05150	Transcriptional repressor TupA/RocA; putative [Source:UniProtKB/TrEMBL
CADAFUAG00000697	82.8129	0.093739	0.535701	0.174984	0.861092	0.999997	AFUA_6G04890	Afu6G04890	CaaX prenyl proteinase Rce1 [Source:UniProtKB/TrEMBL
CADAFUAG00000698	1240.33	-0.358948	0.312035	-1.15034	0.250002	0.999997	AFUA_6G02090	Afu6G02090	ATP synthase subunit E; putative [Source:UniProtKB/TrEMBL
CADAFUAG00000699	74.673	-0.420175	0.567387	-0.740545	0.45897	0.999997	AFUA_6G02140	Afu6G02140	Peptidyl-prolyl cis-trans isomerase-like 1 [Source:UniProtKB/Swiss-Prot
CADAFUAG00000700	6.72614	0.27549	1.63185	0.168821	0.865938	0.999997	AFUA_6G04550	Afu6G04550	Putative uncharacterized protein [Source:UniProtKB/TrEMBL
CADAFUAG00000701	151.072	0.601384	0.444524	1.35287	0.176096	0.999997	AFUA_6G03100	Afu6G03100	Putative uncharacterized protein [Source:UniProtKB/TrEMBL
CADAFUAG00000702	199.784	-0.277107	0.457304	-0.605959	0.544542	0.999997	AFUA_6G03010	Afu6G03010	C2H2 finger domain protein (Zms1); putative [Source:UniProtKB/TrEMBL
CADAFUAG00000703	26.0015	-0.384004	0.865244	-0.44381	0.65718	0.999997	AFUA_6G01900	Afu6G01900	Flavin-binding monooxygenase-like protein [Source:UniProtKB/TrEMBL
CADAFUAG00000704	1377.25	-0.349149	0.31786	-1.09844	0.272014	0.999997	AFUA_6G02720	Afu6G02720	FMN dependent dehydrogenase; putative [Source:UniProtKB/TrEMBL
CADAFUAG00000705	572.007	-0.3098	0.338237	-0.915925	0.359706	0.999997	AFUA_6G04380	Afu6G04380	Molecular chaperone (ABC1); putative [Source:UniProtKB/TrEMBL
CADAFUAG00000706	150.156	0.591518	0.501635	1.17918	0.238327	0.999997	AFUA_6G04400	Afu6G04400	Transcription factor TFIIIB component; putative [Source:UniProtKB/TrEMBL
CADAFUAG00000707	10.274	-0.0788543	1.31074	-0.0601602	0.952028	0.999997	AFUA_6G02575	Afu6G02575	Putative uncharacterized protein [Source:UniProtKB/TrEMBL
CADAFUAG00000708	56.5273	0.42425	0.682849	0.621294	0.534406	0.999997	AFUA_6G05330	Afu6G05330	37 ribosomal protein Rsm10; putative [Source:UniProtKB/TrEMBL
CADAFUAG00000709	130.469	0.534586	0.492272	1.08596	0.277499	0.999997	AFUA_6G02460	Afu6G02460	Glucosamine 6-phosphate acetyltransferase; putative [Source:UniProtKB/TrEMBL
CADAFUAG00000710	4036.54	0.0111662	0.296188	0.0376998	0.969927	0.999997	AFUA_6G04290	Afu6G04290	Phosphoethanolamine N-methyltransferase; putative [Source:UniProtKB/TrEMBL
CADAFUAG00000711	2271.07	0.0704476	0.298744	0.235813	0.813578	0.999997	AFUA_6G02450	Afu6G02450	Ribosomal S30/ubiquitin fusion [Source:UniProtKB/TrEMBL
CADAFUAG00000712	46.7036	0.692865	0.683241	1.01409	0.310541	0.999997	AFUA_6G02410	Afu6G02410	WD repeat protein [Source:UniProtKB/TrEMBL
CADAFUAG00000713	334.952	0.606852	0.362855	1.67244	0.0944381	0.999997	AFUA_6G04280	Afu6G04280	Integral membrane protein [Source:UniProtKB/TrEMBL
CADAFUAG00000714	32.1556	0.0184347	0.801227	0.0230081	0.981644	0.999997	AFUA_6G03030	Afu6G03030	Phenol monooxygenase; putative [Source:UniProtKB/TrEMBL
CADAFUAG00000715	32.3108	0.937447	0.833551	1.12464	0.260741	0.999997	AFUA_6G04090	Afu6G04090	DUF28 domain protein [Source:UniProtKB/TrEMBL
CADAFUAG00000716	173.258	0.348205	0.435369	0.799793	0.423831	0.999997	AFUA_6G04840	Afu6G04840	Hypercellular protein HypA [Source:UniProtKB/TrEMBL
CADAFUAG00000717	988.405	0.00695078	0.309116	0.022486	0.98206	0.999997	AFUA_6G01950	Afu6G01950	Putative uncharacterized protein [Source:UniProtKB/TrEMBL
CADAFUAG00000718	26.7955	-0.75108	0.858801	-0.874569	0.381809	0.999997	AFUA_6G01830	Afu6G01830	O-methyltransferase; putative [Source:UniProtKB/TrEMBL
CADAFUAG00000719	150.009	0.171703	0.441709	0.388724	0.69748	0.999997	AFUA_6G01970	Afu6G01970	GATA transcriptional activator AreA [Source:UniProtKB/TrEMBL
CADAFUAG00000720	13158.6	0.0221785	0.320111	0.0692837	0.944764	0.999997	AFUA_6G02520	Afu6G02520	Eukaryotic translation initiation factor eIF-1A subunit; putative [Source:UniProtKB/TrEMBL
CADAFUAG00000721	317.677	0.143809	0.3656	0.393352	0.69406	0.999997	AFUA_6G05280	Afu6G05280	Meiosis protein MEI2; putative [Source:UniProtKB/TrEMBL
CADAFUAG00000722	145.081	-0.411671	0.441167	-0.93314	0.350748	0.999997	AFUA_6G04800	Afu6G04800	Lysine decarboxylase-like protein [Source:UniProtKB/TrEMBL
CADAFUAG00000723	160.704	0.437661	0.463869	0.943501	0.345425	0.999997	AFUA_6G04870	Afu6G04870	Vacuolar protein sorting-associated protein VpsB [Source:UniProtKB/TrEMBL
CADAFUAG00000724	220.088	0.498322	0.407932	1.22158	0.221867	0.999997	AFUA_6G04650	Afu6G04650	Putative uncharacterized protein [Source:UniProtKB/TrEMBL
CADAFUAG00000725	1.7487	-2.03396	3.21814	-0.632029	0.527368	0.999997	AFUA_6G03300	Afu6G03300	Putative uncharacterized protein [Source:UniProtKB/TrEMBL
CADAFUAG00000726	0	NA	NA	NA	NA	NA	AFUA_6G03270	Afu6G03270	Putative uncharacterized protein [Source:UniProtKB/TrEMBL
CADAFUAG00000727	3.14865	-1.73089	2.30099	-0.752237	0.451908	0.999997	AFUA_6G01790	Afu6G01790	Putative uncharacterized protein [Source:UniProtKB/TrEMBL
CADAFUAG00000728	105.86	0.394636	0.495029	0.797197	0.425337	0.999997	AFUA_6G02060	Afu6G02060	tRNA-splicing endonuclease; putative [Source:UniProtKB/TrEMBL
CADAFUAG00000729	165.462	0.189147	0.434479	0.435342	0.663314	0.999997	AFUA_6G04050	Afu6G04050	Cell division cycle protein 123 [Source:UniProtKB/Swiss-Prot
CADAFUAG00000730	165.948	-0.237507	0.438345	-0.541827	0.587938	0.999997	AFUA_6G04540	Afu6G04540	Calcineurin Ca2+-binding regulatory subunit CnaB [Source:UniProtKB/TrEMBL
CADAFUAG00000731	75.211	-0.748248	0.560819	-1.33421	0.182136	0.999997	AFUA_6G05070	Afu6G05070	tRNA isopentenyltransferase; putative [Source:UniProtKB/TrEMBL
CADAFUAG00000732	48.1951	0.319072	0.668072	0.477602	0.632934	0.999997	AFUA_6G03740	Afu6G03740	C-5 cytosine methyltransferase DmtA [Source:UniProtKB/TrEMBL
CADAFUAG00000733	4.13406	-0.871232	1.99754	-0.436151	0.662727	0.999997	AFUA_6G02430	Afu6G02430	Putative uncharacterized protein [Source:UniProtKB/TrEMBL
CADAFUAG00000734	73.2512	0.139961	0.560544	0.249687	0.802829	0.999997	AFUA_6G04670	Afu6G04670	ER-associated proteolytic system protein Der1; putative [Source:UniProtKB/TrEMBL
CADAFUAG00000735	107.95	0.897063	0.51228	1.75112	0.0799253	0.999997	AFUA_6G02840	Afu6G02840	Serine/threonine protein kinase; putative [Source:UniProtKB/TrEMBL
CADAFUAG00000736	94.3439	0.422256	0.51668	0.817248	0.413787	0.999997	AFUA_6G02200	Afu6G02200	C2HC5 finger protein [Source:UniProtKB/TrEMBL
CADAFUAG00000737	57.7755	0.728051	0.629415	1.15671	0.247391	0.999997	AFUA_6G03840	Afu6G03840	ER to Golgi transport protein Yif1 [Source:UniProtKB/TrEMBL
CADAFUAG00000738	25.2738	-0.542026	0.860698	-0.629752	0.528857	0.999997	AFUA_6G03760	Afu6G03760	HhH-GPD family base excision DNA repair protein [Source:UniProtKB/TrEMBL
CADAFUAG00000739	16.5313	-1.1408	1.04117	-1.09569	0.273214	0.999997	AFUA_6G04590	Afu6G04590	rRNA biogenesis protein rrp36 [Source:UniProtKB/Swiss-Prot
CADAFUAG00000740	1.00569	-0.368647	3.89257	-0.0947054	0.924549	NA	AFUA_6G03150	Afu6G03150	Putative uncharacterized protein [Source:UniProtKB/TrEMBL
CADAFUAG00000741	83.4665	0.733439	0.562916	1.30293	0.192599	0.999997	AFUA_6G05180	Afu6G05180	Splicing factor 3b subunit 4 [Source:UniProtKB/TrEMBL
CADAFUAG00000742	433.3	0.619036	0.359857	1.72023	0.085391	0.999997	AFUA_6G01910	Afu6G01910	C2H2 finger domain protein; putative [Source:UniProtKB/TrEMBL
CADAFUAG00000743	43.8055	-0.444424	0.680659	-0.652932	0.5138	0.999997	AFUA_6G02215	Afu6G02215	Putative uncharacterized protein [Source:UniProtKB/TrEMBL
CADAFUAG00000744	110.789	-0.00669576	0.486749	-0.0137561	0.989025	0.999997	AFUA_6G04020	Afu6G04020	Peptidyl-tRNA hydrolase domain protein [Source:UniProtKB/TrEMBL
CADAFUAG00000745	73.8445	-0.353496	0.554259	-0.637781	0.523616	0.999997	AFUA_6G04930	Afu6G04930	Putative uncharacterized protein [Source:UniProtKB/TrEMBL
CADAFUAG00000746	16.8587	0.353347	1.07768	0.327879	0.743003	0.999997	AFUA_6G03450	Afu6G03450	Putative uncharacterized protein [Source:UniProtKB/TrEMBL
CADAFUAG00000747	20.4466	0.0398522	0.971771	0.0410098	0.967288	0.999997	AFUA_6G03440	Afu6G03440	Fructosyl amino acid oxidase; putative [Source:UniProtKB/TrEMBL
CADAFUAG00000748	22.8374	-0.290467	0.907355	-0.320125	0.748874	0.999997	AFUA_6G03020	Afu6G03020	Flavin-binding monooxygenase; putative [Source:UniProtKB/TrEMBL
CADAFUAG00000749	459.304	0.333041	0.340808	0.977209	0.328465	0.999997	AFUA_6G02110	Afu6G02110	MADS box transcription factor Mcm1 [Source:UniProtKB/TrEMBL
CADAFUAG00000750	83.9972	0.561484	0.588891	0.95346	0.340357	0.999997	AFUA_6G03900	Afu6G03900	F-box domain protein [Source:UniProtKB/TrEMBL
CADAFUAG00000751	47.4317	0.231738	0.711708	0.325608	0.744721	0.999997	AFUA_6G03980	Afu6G03980	Hexokinase; putative [Source:UniProtKB/TrEMBL
CADAFUAG00000752	42.712	0.0722407	0.760045	0.095048	0.924277	0.999997	AFUA_6G03590	Afu6G03590	Citrate synthase [Source:UniProtKB/TrEMBL
CADAFUAG00000753	275.126	0.0250485	0.3825	0.0654863	0.947787	0.999997	AFUA_6G05130	Afu6G05130	snRNA cap binding complex subunit (Gcr3); putative [Source:UniProtKB/TrEMBL
CADAFUAG00000754	11.6383	-0.239413	1.30322	-0.183709	0.854242	0.999997	AFUA_6G02610	Afu6G02610	Putative uncharacterized protein [Source:UniProtKB/TrEMBL
CADAFUAG00000755	357.651	0.515394	0.369873	1.39344	0.163488	0.999997	AFUA_8G02110	Afu8G02110	Putative uncharacterized protein [Source:UniProtKB/TrEMBL
CADAFUAG00000756	1235.68	-0.340899	0.32876	-1.03692	0.299771	0.999997	AFUA_8G02550	Afu8G02550	MFS peptide transporter; putative [Source:UniProtKB/TrEMBL
CADAFUAG00000757	12.179	0.5118	1.25429	0.408039	0.683245	0.999997	AFUA_8G01980	Afu8G01980	Putative uncharacterized protein [Source:UniProtKB/TrEMBL
CADAFUAG00000758	10.3398	-0.302253	1.30012	-0.232481	0.816164	0.999997	AFUA_8G00410	Afu8G00410	Methionine aminopeptidase 2-1 [Source:UniProtKB/Swiss-Prot
CADAFUAG00000759	90.0025	-0.436619	0.558475	-0.781806	0.434329	0.999997	AFUA_8G01370	Afu8G01370	CmcJ-like methyltransferase; putative [Source:UniProtKB/TrEMBL
CADAFUAG00000760	1258.71	-0.375755	0.328875	-1.14255	0.253227	0.999997	AFUA_8G02180	Afu8G02180	GABA permease; putative [Source:UniProtKB/TrEMBL
CADAFUAG00000761	1347.03	0.240363	0.303366	0.792321	0.428174	0.999997	AFUA_8G01800	Afu8G01800	Thiosulfate sulfurtransferase; putative [Source:UniProtKB/TrEMBL
CADAFUAG00000762	6.31707	-0.259765	1.64052	-0.158344	0.874186	0.999997	AFUA_8G00480	Afu8G00480	Phytanoyl-CoA dioxygenase family protein [Source:UniProtKB/TrEMBL
CADAFUAG00000763	361.265	-0.238638	0.35347	-0.67513	0.499593	0.999997	AFUA_8G02820	Afu8G02820	Cell cycle checkpoint protein Rad17; putative [Source:UniProtKB/TrEMBL
CADAFUAG00000764	14.7568	-0.420387	1.10005	-0.382152	0.702349	0.999997	AFUA_8G02610	Afu8G02610	Cytochrome P450 monooxygenase; putative [Source:UniProtKB/TrEMBL
CADAFUAG00000765	33.1071	-0.447317	0.775215	-0.577022	0.563924	0.999997	AFUA_8G00370	Afu8G00370	Polyketide synthase; putative [Source:UniProtKB/TrEMBL
CADAFUAG00000766	21.8213	-0.172936	0.958328	-0.180456	0.856795	0.999997	AFUA_8G01630	Afu8G01630	Pyridine nucleotide-disulphide oxidoreductase family protein [Source:UniProtKB/TrEMBL
CADAFUAG00000767	180.577	-0.583182	0.438902	-1.32873	0.183937	0.999997	AFUA_8G00440	Afu8G00440	Steroid monooxygenase; putative [Source:UniProtKB/TrEMBL
CADAFUAG00000768	6.41795	-0.211912	1.72158	-0.123091	0.902035	0.999997	AFUA_8G02640	Afu8G02640	C6 transcription factor; putative [Source:UniProtKB/TrEMBL
CADAFUAG00000769	0.32847	1.14964	6.11021	0.18815	0.850759	NA	AFUA_8G01500	Afu8G01500	Pfs domain protein; putative [Source:UniProtKB/TrEMBL
CADAFUAG00000770	3.70908	0.897609	2.24675	0.399513	0.689515	0.999997	AFUA_8G01440	Afu8G01440	C6 finger domain protein; putative [Source:UniProtKB/TrEMBL
CADAFUAG00000771	2.70339	1.56045	2.7567	0.566059	0.571354	0.999997	AFUA_8G01990	Afu8G01990	C6 transcription factor; putative [Source:UniProtKB/TrEMBL
CADAFUAG00000772	14672.6	-0.259172	0.311633	-0.831657	0.405602	0.999997	AFUA_8G02720	Afu8G02720	Protein phosphatase type 1 complex subunit Hex2/Reg1; putative [Source:UniProtKB/TrEMBL
CADAFUAG00000773	20.508	-0.438778	0.947464	-0.463108	0.643287	0.999997	AFUA_8G00710	Afu8G00710	Secreted antimicrobial peptide; putative [Source:UniProtKB/TrEMBL
CADAFUAG00000774	7.90894	-0.401907	1.49028	-0.269686	0.787402	0.999997	AFUA_8G02670	Afu8G02670	Putative uncharacterized protein [Source:UniProtKB/TrEMBL
CADAFUAG00000775	0.282951	1.04089	6.11615	0.170187	0.864863	NA	AFUA_8G01130	Afu8G01130	Alpha-galactosidase C; putative [Source:UniProtKB/TrEMBL
CADAFUAG00000776	0	NA	NA	NA	NA	NA	AFUA_8G02335	Afu8G02335	Putative uncharacterized protein [Source:UniProtKB/TrEMBL
CADAFUAG00000777	512.788	0.0424887	0.338112	0.125664	0.899998	0.999997	AFUA_8G02750	Afu8G02750	rRNA-processing protein cgrA [Source:UniProtKB/Swiss-Prot
CADAFUAG00000778	1865.23	-0.0939017	0.303745	-0.309147	0.75721	0.999997	AFUA_8G01930	Afu8G01930	Methyltransferase LaeA-like; putative [Source:UniProtKB/TrEMBL
CADAFUAG00000779	25.4251	-0.341521	0.861166	-0.396579	0.691678	0.999997	AFUA_8G00900	Afu8G00900	Spherulin 4-like cell surface protein; putative [Source:UniProtKB/TrEMBL
CADAFUAG00000780	2.16273	3.89553	3.32482	1.17165	0.241337	0.999997	AFUA_8G02680	Afu8G02680	Putative uncharacterized protein [Source:UniProtKB/TrEMBL
CADAFUAG00000781	2.91122	-2.08172	2.39811	-0.868069	0.385357	0.999997	AFUA_8G00430	Afu8G00430	Putative uncharacterized protein [Source:UniProtKB/TrEMBL
CADAFUAG00000782	3.41133	-0.78373	2.18116	-0.359317	0.719358	0.999997	AFUA_8G02240	Afu8G02240	F-box domain protein [Source:UniProtKB/TrEMBL
CADAFUAG00000783	19.6186	-0.310153	0.992608	-0.312462	0.754689	0.999997	AFUA_8G00270	Afu8G00270	Putative uncharacterized protein [Source:UniProtKB/TrEMBL
CADAFUAG00000784	2611.11	-0.503626	0.32605	-1.54463	0.122436	0.999997	AFUA_8G01730	Afu8G01730	Glycosyl transferase family protein [Source:UniProtKB/TrEMBL
CADAFUAG00000785	40.2012	0.192621	0.722106	0.266749	0.789662	0.999997	AFUA_8G00930	Afu8G00930	Chitosanase; putative [Source:UniProtKB/TrEMBL
CADAFUAG00000786	3.54292	-1.99292	2.18838	-0.910686	0.362461	0.999997	AFUA_8G01090	Afu8G01090	Thioredoxin [Source:UniProtKB/TrEMBL
CADAFUAG00000787	5.7314	-2.13166	1.73906	-1.22575	0.220291	0.999997	AFUA_8G00140	Afu8G00140	MFS transporter; putative [Source:UniProtKB/TrEMBL
CADAFUAG00000788	65.7595	-0.499784	0.595824	-0.838812	0.401575	0.999997	AFUA_8G02290	Afu8G02290	Putative uncharacterized protein [Source:UniProtKB/TrEMBL
CADAFUAG00000789	0.32847	1.14964	6.11021	0.18815	0.850759	NA	AFUA_8G00110	Afu8G00110	Oxidoreductase; 2OG-Fe(II) oxygenase family; putative [Source:UniProtKB/TrEMBL
CADAFUAG00000790	16.0915	-1.08037	1.05861	-1.02055	0.307466	0.999997	AFUA_8G02350	Afu8G02350	PKS-like enzyme; putative [Source:UniProtKB/TrEMBL
CADAFUAG00000791	5.89209	0.999999	1.81029	0.552397	0.580676	0.999997	AFUA_8G01380	Afu8G01380	NB-ARC and TPR domain protein [Source:UniProtKB/TrEMBL
CADAFUAG00000792	2.53176	0.155656	2.61088	0.0596182	0.95246	0.999997	AFUA_8G02340	Afu8G02340	Putative uncharacterized protein [Source:UniProtKB/TrEMBL
CADAFUAG00000793	0.32847	1.14964	6.11021	0.18815	0.850759	NA	AFUA_8G01200	Afu8G01200	Putative uncharacterized protein [Source:UniProtKB/TrEMBL
CADAFUAG00000794	52.8863	-0.0640895	0.643809	-0.0995475	0.920704	0.999997	AFUA_8G02315	Afu8G02315	Putative uncharacterized protein [Source:UniProtKB/TrEMBL
CADAFUAG00000795	92.9334	0.36391	0.524317	0.694066	0.487641	0.999997	AFUA_8G01250	Afu8G01250	GNAT family acetyltransferase; putative [Source:UniProtKB/TrEMBL
CADAFUAG00000796	253.251	-0.452868	0.380291	-1.19085	0.233714	0.999997	AFUA_8G00790	Afu8G00790	Putative uncharacterized protein [Source:UniProtKB/TrEMBL
CADAFUAG00000797	26.0924	-0.724178	0.876832	-0.825903	0.408859	0.999997	AFUA_8G02770	Afu8G02770	Cytidine deaminase; putative [Source:UniProtKB/TrEMBL
CADAFUAG00000798	350.45	-0.357902	0.370014	-0.967266	0.333411	0.999997	AFUA_8G02790	Afu8G02790	Exocyst complex component Sec10; putative [Source:UniProtKB/TrEMBL
CADAFUAG00000799	396884	-0.162958	0.310189	-0.52535	0.59934	0.999997	AFUA_8G01690	Afu8G01690	Putative uncharacterized protein [Source:UniProtKB/TrEMBL
CADAFUAG00000800	16.1864	0.11348	1.07886	0.105185	0.916229	0.999997	AFUA_8G00660	Afu8G00660	Solute transporter; putative [Source:UniProtKB/TrEMBL
CADAFUAG00000801	2057.9	0.330454	0.293914	1.12432	0.260876	0.999997	AFUA_8G00962	Afu8G00962	Cytochrome P450; putative [Source:UniProtKB/TrEMBL
CADAFUAG00000802	28.5787	-0.334855	0.825728	-0.405527	0.68509	0.999997	AFUA_8G02060	Afu8G02060	Glycan biosynthesis protein (PigL); putative [Source:UniProtKB/TrEMBL
CADAFUAG00000803	0.788532	-3.81359	4.93379	-0.772954	0.43955	NA	AFUA_8G01000	Afu8G01000	Ankyrin repeat protein [Source:UniProtKB/TrEMBL
CADAFUAG00000804	13.6036	0.731842	1.19498	0.612428	0.540255	0.999997	AFUA_8G01290	Afu8G01290	Putative uncharacterized protein [Source:UniProtKB/TrEMBL
CADAFUAG00000805	200.028	0.307999	0.41026	0.750743	0.452808	0.999997	AFUA_8G02460	Afu8G02460	MFS transporter; putative [Source:UniProtKB/TrEMBL
CADAFUAG00000806	201.003	-0.187355	0.405713	-0.461792	0.644231	0.999997	AFUA_8G02470	Afu8G02470	Trihydroxytoluene oxygenase [Source:UniProtKB/TrEMBL
CADAFUAG00000807	0.394266	-2.81358	5.94816	-0.473017	0.636201	NA	AFUA_8G00630	Afu8G00630	Putative uncharacterized protein [Source:UniProtKB/TrEMBL
CADAFUAG00000808	0.677217	-1.40004	4.95396	-0.282611	0.777475	NA	AFUA_8G01950	Afu8G01950	Putative uncharacterized protein [Source:UniProtKB/TrEMBL
CADAFUAG00000809	21.755	0.55873	0.950973	0.587534	0.556845	0.999997	AFUA_8G02010	Afu8G02010	MFS sugar transporter; putative [Source:UniProtKB/TrEMBL
CADAFUAG00000810	1.22284	3.07468	4.01507	0.765784	0.443805	NA	AFUA_8G01550	Afu8G01550	Oxidoreductase; short chain dehydrogenase/reductase family superfamily [Source:UniProtKB/TrEMBL
CADAFUAG00000811	1.35443	-1.45372	3.60856	-0.402855	0.687055	NA	AFUA_8G01320	Afu8G01320	Putative uncharacterized protein [Source:UniProtKB/TrEMBL
CADAFUAG00000812	0.394266	-2.81358	5.94816	-0.473017	0.636201	NA	AFUA_8G01460	Afu8G01460	Putative uncharacterized protein [Source:UniProtKB/TrEMBL
CADAFUAG00000813	148.797	0.0670489	0.449028	0.14932	0.881301	0.999997	AFUA_8G00700	Afu8G00700	Class III chitinase ChiA2 [Source:UniProtKB/TrEMBL
CADAFUAG00000814	403.475	-0.691207	0.355073	-1.94666	0.0515754	0.999997	AFUA_8G00470	Afu8G00470	Putative uncharacterized protein [Source:UniProtKB/TrEMBL
CADAFUAG00000815	5.61958	0.352834	1.77806	0.198438	0.842702	0.999997	AFUA_8G01010	Afu8G01010	Thermophilic desulfurizing enzyme family protein [Source:UniProtKB/TrEMBL
CADAFUAG00000816	236.873	-0.413106	0.40216	-1.02722	0.304318	0.999997	AFUA_8G00650	Afu8G00650	LPS glycosyltransferase; putative [Source:UniProtKB/TrEMBL
CADAFUAG00000817	3.71952	0.0907938	2.17414	0.0417607	0.966689	0.999997	AFUA_8G00490	Afu8G00490	PKS-like enzyme; putative [Source:UniProtKB/TrEMBL
CADAFUAG00000818	6.35712	1.12891	1.72614	0.654009	0.513106	0.999997	AFUA_8G01410	Afu8G01410	Class V chitinase ChiB1 [Source:UniProtKB/TrEMBL
CADAFUAG00000819	22.4388	-0.548354	0.920969	-0.595409	0.55157	0.999997	AFUA_8G02500	Afu8G02500	Glutathione S-transferase [Source:UniProtKB/TrEMBL
CADAFUAG00000820	17.531	-0.0272565	1.02472	-0.0265988	0.97878	0.999997	AFUA_8G02210	Afu8G02210	Alpha-ketoglutarate-dependent taurine dioxygenase [Source:UniProtKB/TrEMBL
CADAFUAG00000821	12.6539	0.588949	1.21589	0.484379	0.628117	0.999997	AFUA_8G01030	Afu8G01030	Putative uncharacterized protein [Source:UniProtKB/TrEMBL
CADAFUAG00000822	674.247	0.13506	0.322889	0.418287	0.675737	0.999997	AFUA_8G01070	Afu8G01070	Sterol desaturase; putative [Source:UniProtKB/TrEMBL
CADAFUAG00000823	1.26836	3.12136	4.00219	0.779912	0.435443	NA	AFUA_8G02260	Afu8G02260	Neutral amino acid permease [Source:UniProtKB/TrEMBL
CADAFUAG00000824	3.0571	4.39663	3.00864	1.46134	0.143923	0.999997	AFUA_8G01810	Afu8G01810	Putative uncharacterized protein [Source:UniProtKB/TrEMBL
CADAFUAG00000825	0	NA	NA	NA	NA	NA	AFUA_8G02230	Afu8G02230	Serine-leucine-rich repeat protein [Source:UniProtKB/TrEMBL
CADAFUAG00000826	1.31388	3.16883	4.28515	0.739491	0.459609	NA	AFUA_8G00580	Afu8G00580	Glutathione S-transferase; putative [Source:UniProtKB/TrEMBL
CADAFUAG00000827	691.456	-0.0677913	0.321863	-0.210622	0.833183	0.999997	AFUA_8G02200	Afu8G02200	Proline permease; putative [Source:UniProtKB/TrEMBL
CADAFUAG00000828	3171.5	-0.138857	0.291185	-0.47687	0.633455	0.999997	AFUA_8G02850	Afu8G02850	Actin binding protein; putative [Source:UniProtKB/TrEMBL
CADAFUAG00000829	22.1953	-0.135849	0.938533	-0.144746	0.884911	0.999997	AFUA_8G01400	Afu8G01400	Mitochondrial carrier protein (Pet8); putative [Source:UniProtKB/TrEMBL
CADAFUAG00000830	11.2084	0.901682	1.30323	0.691881	0.489012	0.999997	AFUA_8G02310	Afu8G02310	Aldehyde dehydrogenase ALDH [Source:UniProtKB/TrEMBL
CADAFUAG00000831	1.1828	-4.39858	4.12321	-1.06678	0.286069	NA	AFUA_8G01580	Afu8G01580	Aminotransferase; classes I and II family [Source:UniProtKB/TrEMBL
CADAFUAG00000832	5.03391	-1.75813	1.84699	-0.951889	0.341153	0.999997	AFUA_8G00620	Afu8G00620	Dimethylallyl tryptophan synthase; putative [Source:UniProtKB/TrEMBL
CADAFUAG00000833	56.818	-0.259294	0.621332	-0.417319	0.676445	0.999997	AFUA_8G01760	Afu8G01760	Putative uncharacterized protein [Source:UniProtKB/TrEMBL
CADAFUAG00000834	33.8753	-0.462709	0.773584	-0.598136	0.549749	0.999997	AFUA_8G00770	Afu8G00770	Sugar transporter family protein [Source:UniProtKB/TrEMBL
CADAFUAG00000835	380.947	0.158082	0.351206	0.450112	0.65263	0.999997	AFUA_8G00730	Afu8G00730	Transcription regulator (RTG2); putative [Source:UniProtKB/TrEMBL
CADAFUAG00000836	0.722736	-1.30454	4.8333	-0.269907	0.787232	NA	AFUA_8G00570	Afu8G00570	Alpha/beta hydrolase; putative [Source:UniProtKB/TrEMBL
CADAFUAG00000837	1934.6	-0.410682	0.310798	-1.32138	0.186375	0.999997	AFUA_8G02120	Afu8G02120	Putative uncharacterized protein [Source:UniProtKB/TrEMBL
CADAFUAG00000838	37.4715	0.486629	0.741304	0.65645	0.511535	0.999997	AFUA_8G02690	Afu8G02690	Glucose N-acetyltransferase 1 [Source:UniProtKB/Swiss-Prot
CADAFUAG00000839	9.68785	0.0453171	1.3704	0.0330686	0.97362	0.999997	AFUA_8G01820	Afu8G01820	Putative uncharacterized protein [Source:UniProtKB/TrEMBL
CADAFUAG00000840	16.7222	0.339243	1.06251	0.319285	0.74951	0.999997	AFUA_8G02590	Afu8G02590	Lipase/thioesterase family protein [Source:UniProtKB/TrEMBL
CADAFUAG00000841	1.6829	-0.812036	3.04856	-0.266368	0.789956	0.999997	AFUA_8G01160	Afu8G01160	Tartrate dehydrogenase; putative [Source:UniProtKB/TrEMBL
CADAFUAG00000842	99.0673	-1.05868	0.552564	-1.91595	0.0553715	0.999997	AFUA_8G01360	Afu8G01360	Putative uncharacterized protein [Source:UniProtKB/TrEMBL
CADAFUAG00000843	0.848852	2.55957	5.0219	0.509681	0.610275	NA	AFUA_8G02600	Afu8G02600	Short-chain dehydrogenase/reductase 2; putative [Source:UniProtKB/TrEMBL
CADAFUAG00000844	1217.77	0.111646	0.324983	0.343545	0.731188	0.999997	AFUA_8G00780	Afu8G00780	Putative uncharacterized protein [Source:UniProtKB/TrEMBL
CADAFUAG00000845	36.6983	0.689587	0.764814	0.90164	0.367248	0.999997	AFUA_8G02540	Afu8G02540	Putative uncharacterized protein [Source:UniProtKB/TrEMBL
CADAFUAG00000846	168.376	-0.039965	0.423933	-0.0942719	0.924893	0.999997	AFUA_8G00680	Afu8G00680	Glycosyl transferase; putative [Source:UniProtKB/TrEMBL
CADAFUAG00000847	1.00569	-0.368647	3.89257	-0.0947054	0.924549	NA	AFUA_8G00130	Afu8G00130	Putative uncharacterized protein [Source:UniProtKB/TrEMBL
CADAFUAG00000848	943.117	-0.33268	0.366863	-0.906823	0.3645	0.999997	AFUA_8G00540	Afu8G00540	Nonribosomal peptide synthetase 14 [Source:UniProtKB/Swiss-Prot
CADAFUAG00000849	1.07148	-2.39775	4.03937	-0.593595	0.552783	NA	AFUA_8G02150	Afu8G02150	Acetylornithine aminotransferase; putative [Source:UniProtKB/TrEMBL
CADAFUAG00000850	571.407	-1.48013	0.332194	-4.45562	8.36528e-06	0.00543564	AFUA_8G01330	Afu8G01330	Putative uncharacterized protein [Source:UniProtKB/TrEMBL
CADAFUAG00000851	11.158	0.348935	1.30195	0.268009	0.788692	0.999997	AFUA_8G02000	Afu8G02000	Sorbitol/xylitol dehydrogenase; putative [Source:UniProtKB/TrEMBL
CADAFUAG00000852	16.9398	-0.246751	1.03488	-0.238434	0.811545	0.999997	AFUA_8G00260	Afu8G00260	F-box domain and ankyrin repeat protein [Source:UniProtKB/TrEMBL
CADAFUAG00000853	18.9002	0.136263	0.994944	0.136955	0.891066	0.999997	AFUA_8G01240	Afu8G01240	C6 transcription factor; putative [Source:UniProtKB/TrEMBL
CADAFUAG00000854	78.0834	1.22159	0.582117	2.09852	0.0358588	0.999997	AFUA_8G01660	Afu8G01660	Putative uncharacterized protein [Source:UniProtKB/TrEMBL
CADAFUAG00000855	7.99501	-0.946979	1.5515	-0.610365	0.54162	0.999997	AFUA_8G01720	Afu8G01720	Putative uncharacterized protein [Source:UniProtKB/TrEMBL
CADAFUAG00000856	56651.7	0.372839	0.280162	1.3308	0.183255	0.999997	AFUA_8G01710	Afu8G01710	Antigenic thaumatin domain protein; putative [Source:UniProtKB/TrEMBL
CADAFUAG00000857	4010.22	0.215276	0.288219	0.74692	0.455112	0.999997	AFUA_8G00840	Afu8G00840	Amino acid permease; putative [Source:UniProtKB/TrEMBL
CADAFUAG00000858	111.22	-0.0459774	0.485056	-0.0947879	0.924483	0.999997	AFUA_8G02490	Afu8G02490	Putative uncharacterized protein [Source:UniProtKB/TrEMBL
CADAFUAG00000859	3.12838	-1.03029	2.2792	-0.452041	0.651239	0.999997	AFUA_8G00750	Afu8G00750	C2H2 transcription factor; putative [Source:UniProtKB/TrEMBL
CADAFUAG00000860	8.32845	-0.286176	1.43938	-0.19882	0.842404	0.999997	AFUA_8G00810	Afu8G00810	Putative uncharacterized protein [Source:UniProtKB/TrEMBL
CADAFUAG00000861	124.459	0.0471845	0.472414	0.0998796	0.92044	0.999997	AFUA_8G02050	Afu8G02050	Putative uncharacterized protein [Source:UniProtKB/TrEMBL
CADAFUAG00000862	43.9124	-0.654336	0.686706	-0.952861	0.34066	0.999997	AFUA_8G00190	Afu8G00190	Cytochrome P450; putative [Source:UniProtKB/TrEMBL
CADAFUAG00000863	384.117	-0.262028	0.386151	-0.678562	0.497416	0.999997	AFUA_8G01680	Afu8G01680	Putative uncharacterized protein [Source:UniProtKB/TrEMBL
CADAFUAG00000864	451.627	-0.367804	0.389915	-0.943292	0.345531	0.999997	AFUA_8G01870	Afu8G01870	Putative uncharacterized protein [Source:UniProtKB/TrEMBL
CADAFUAG00000865	310.68	-0.422945	0.435844	-0.970405	0.331845	0.999997	AFUA_8G00920	Afu8G00920	UDP-glucose dehydrogenase Ugd1; putative [Source:UniProtKB/TrEMBL
CADAFUAG00000866	411.887	-0.253782	0.382501	-0.66348	0.507023	0.999997	AFUA_8G02090	Afu8G02090	Nucleotide-sugar transporter; putative [Source:UniProtKB/TrEMBL
CADAFUAG00000867	2.29929	3.97687	3.58802	1.10837	0.2677	0.999997	AFUA_8G02420	Afu8G02420	Putative uncharacterized protein [Source:UniProtKB/TrEMBL
CADAFUAG00000868	0.282951	1.04089	6.11615	0.170187	0.864863	NA	AFUA_8G02250	Afu8G02250	Putative uncharacterized protein [Source:UniProtKB/TrEMBL
CADAFUAG00000869	34.9907	0.270139	0.759471	0.355693	0.72207	0.999997	AFUA_8G02140	Afu8G02140	Ankyrin repeat protein [Source:UniProtKB/TrEMBL
CADAFUAG00000870	5.68537	-0.0906502	1.73991	-0.0521004	0.958449	0.999997	AFUA_8G01570	Afu8G01570	ADP-ribosylglycohydrolase family protein [Source:UniProtKB/TrEMBL
CADAFUAG00000871	633.427	0.407159	0.336985	1.20824	0.226955	0.999997	AFUA_8G01300	Afu8G01300	Putative uncharacterized protein [Source:UniProtKB/TrEMBL
CADAFUAG00000872	775.578	0.244114	0.319836	0.763248	0.445316	0.999997	AFUA_8G02780	Afu8G02780	Vacuolar protein sorting/targeting protein 10 [Source:UniProtKB/Swiss-Prot
CADAFUAG00000873	1.39995	-1.36906	3.31894	-0.4125	0.679973	0.999997	AFUA_8G00510	Afu8G00510	Cytochrome P450 oxidoreductase OrdA-like; putative [Source:UniProtKB/TrEMBL
CADAFUAG00000874	80.0485	-0.102284	0.56463	-0.181153	0.856248	0.999997	AFUA_8G01770	Afu8G01770	Putative uncharacterized protein [Source:UniProtKB/TrEMBL
CADAFUAG00000875	162.594	-0.517381	0.42686	-1.21206	0.225489	0.999997	AFUA_8G01890	Afu8G01890	Na+/H+ exchanger family protein; putative [Source:UniProtKB/TrEMBL
CADAFUAG00000876	3.53744	0.00145721	2.19912	0.000662632	0.999471	0.999997	AFUA_8G01490	Afu8G01490	Endoglucanase; putative [Source:UniProtKB/TrEMBL
CADAFUAG00000877	0.282951	1.04089	6.11615	0.170187	0.864863	NA	AFUA_8G01180	Afu8G01180	MFS sugar transporter; putative [Source:UniProtKB/TrEMBL
CADAFUAG00000878	0	NA	NA	NA	NA	NA	AFUA_8G02360	Afu8G02360	TRI7-like toxin biosynthesis protein; putative [Source:UniProtKB/TrEMBL
CADAFUAG00000879	107.074	0.285676	0.490956	0.581876	0.56065	0.999997	AFUA_8G02650	Afu8G02650	ABC multidrug transporter; putative [Source:UniProtKB/TrEMBL
CADAFUAG00000880	337.858	0.168111	0.373062	0.450625	0.65226	0.999997	AFUA_8G01390	Afu8G01390	Glycosyl hydrolase; putative [Source:UniProtKB/TrEMBL
CADAFUAG00000881	71.7571	-0.0157138	0.618674	-0.0253992	0.979737	0.999997	AFUA_8G00300	Afu8G00300	Putative uncharacterized protein [Source:UniProtKB/TrEMBL
CADAFUAG00000882	134.889	-0.454188	0.4607	-0.985864	0.3242	0.999997	AFUA_8G00820	Afu8G00820	Rhamnogalacturonase; putative [Source:UniProtKB/TrEMBL
CADAFUAG00000883	10.9715	-0.384573	1.26533	-0.303932	0.76118	0.999997	AFUA_8G01080	Afu8G01080	Putative uncharacterized protein [Source:UniProtKB/TrEMBL
CADAFUAG00000884	14539.1	-0.287115	0.319611	-0.898325	0.369012	0.999997	AFUA_8G02530	Afu8G02530	Extracellular lipase; putative [Source:UniProtKB/TrEMBL
CADAFUAG00000885	22.5643	-0.314406	0.952604	-0.330049	0.741363	0.999997	AFUA_8G01560	Afu8G01560	Aldo-keto reductase (YakC); putative [Source:UniProtKB/TrEMBL
CADAFUAG00000886	0	NA	NA	NA	NA	NA	AFUA_8G01170	Afu8G01170	Putative uncharacterized protein [Source:UniProtKB/TrEMBL
CADAFUAG00000887	187.003	0.361371	0.450337	0.802446	0.422295	0.999997	AFUA_8G02840	Afu8G02840	Dynamin-like GTPase Dnm1; putative [Source:UniProtKB/TrEMBL
CADAFUAG00000888	22.322	-0.129859	0.920732	-0.141039	0.887839	0.999997	AFUA_8G00240	Afu8G00240	Cytochrome P450 monooxygenase; putative [Source:UniProtKB/TrEMBL
CADAFUAG00000889	110.195	-0.134324	0.4848	-0.277071	0.781725	0.999997	AFUA_8G02700	Afu8G02700	Repressor protein [Source:UniProtKB/TrEMBL
CADAFUAG00000890	627.653	-0.134493	0.336994	-0.399098	0.689821	0.999997	AFUA_8G02450	Afu8G02450	Putative uncharacterized protein [Source:UniProtKB/TrEMBL
CADAFUAG00000891	6.51395	0.643096	1.66967	0.385163	0.700117	0.999997	AFUA_8G00610	Afu8G00610	Cell surface protein Mas1; putative [Source:UniProtKB/TrEMBL
CADAFUAG00000892	16.7775	0.35037	1.0594	0.330726	0.740851	0.999997	AFUA_8G02040	Afu8G02040	Glycosyl transferase; putative [Source:UniProtKB/TrEMBL
CADAFUAG00000893	99.5219	-0.199493	0.509185	-0.391789	0.695214	0.999997	AFUA_8G02620	Afu8G02620	CobW domain protein [Source:UniProtKB/TrEMBL
CADAFUAG00000894	9.42517	-0.276468	1.36912	-0.201931	0.839971	0.999997	AFUA_8G02390	Afu8G02390	Putative uncharacterized protein [Source:UniProtKB/TrEMBL
CADAFUAG00000895	28.0008	0.783619	0.856132	0.915302	0.360033	0.999997	AFUA_8G01830	Afu8G01830	Putative uncharacterized protein [Source:UniProtKB/TrEMBL
CADAFUAG00000896	1134.36	-0.0175138	0.332826	-0.0526215	0.958033	0.999997	AFUA_8G01670	Afu8G01670	Catalase-peroxidase [Source:UniProtKB/Swiss-Prot
CADAFUAG00000897	3508.52	-0.573322	0.311572	-1.8401	0.065754	0.999997	AFUA_8G02480	Afu8G02480	Putative uncharacterized protein [Source:UniProtKB/TrEMBL
CADAFUAG00000898	8.11078	1.04599	1.5489	0.675312	0.499477	0.999997	AFUA_8G01780	Afu8G01780	Nitrilase; putative [Source:UniProtKB/TrEMBL
CADAFUAG00000899	1.6829	-0.812036	3.04856	-0.266368	0.789956	0.999997	AFUA_8G00880	Afu8G00880	Putative uncharacterized protein [Source:UniProtKB/TrEMBL
CADAFUAG00000900	160.67	0.331261	0.463077	0.715346	0.474395	0.999997	AFUA_8G00590	Afu8G00590	Fatty acid desaturase; putative [Source:UniProtKB/TrEMBL
CADAFUAG00000901	1.51127	-2.9085	3.50833	-0.829027	0.407089	0.999997	AFUA_8G01190	Afu8G01190	Isoamyl alcohol oxidase; putative [Source:UniProtKB/TrEMBL
CADAFUAG00000902	5.31138	-0.238975	1.78135	-0.134154	0.893281	0.999997	AFUA_8G00760	Afu8G00760	Cytochrome P450; putative [Source:UniProtKB/TrEMBL
CADAFUAG00000903	26.3393	0.123672	0.857494	0.144225	0.885323	0.999997	AFUA_8G02170	Afu8G02170	C6 finger domain protein; putative [Source:UniProtKB/TrEMBL
CADAFUAG00000904	0	NA	NA	NA	NA	NA	AFUA_8G02220	Afu8G02220	Putative uncharacterized protein [Source:UniProtKB/TrEMBL
CADAFUAG00000905	10.5877	-0.479612	1.31163	-0.36566	0.714619	0.999997	AFUA_8G00740	Afu8G00740	Cytochrome P450; putative [Source:UniProtKB/TrEMBL
CADAFUAG00000906	47.8441	-0.634728	0.658484	-0.963924	0.335084	0.999997	AFUA_8G00910	Afu8G00910	Putative uncharacterized protein [Source:UniProtKB/TrEMBL
CADAFUAG00000907	0.394266	-2.81358	5.94816	-0.473017	0.636201	NA	AFUA_8G02080	Afu8G02080	Putative uncharacterized protein [Source:UniProtKB/TrEMBL
CADAFUAG00000908	3.82536	2.11644	2.41195	0.877478	0.380227	0.999997	AFUA_8G01150	Afu8G01150	C6 transcription factor; putative [Source:UniProtKB/TrEMBL
CADAFUAG00000909	128.394	0.388853	0.463708	0.838573	0.401709	0.999997	AFUA_8G02130	Afu8G02130	1;3-beta-glucanosyltransferase; putative [Source:UniProtKB/TrEMBL
CADAFUAG00000910	5.77145	-0.871214	1.70324	-0.511504	0.608998	0.999997	AFUA_8G00350	Afu8G00350	Putative uncharacterized protein [Source:UniProtKB/TrEMBL
CADAFUAG00000911	77.0628	-0.189526	0.547847	-0.345948	0.729382	0.999997	AFUA_8G02660	Afu8G02660	Chromate ion transporter; putative [Source:UniProtKB/TrEMBL
CADAFUAG00000912	242.417	0.36418	0.388436	0.937556	0.348472	0.999997	AFUA_8G01940	Afu8G01940	C6 finger domain protein; putative [Source:UniProtKB/TrEMBL
CADAFUAG00000913	72.6951	0.124851	0.565973	0.220595	0.825408	0.999997	AFUA_8G00980	Afu8G00980	Putative uncharacterized protein [Source:UniProtKB/TrEMBL
CADAFUAG00000914	35.9964	0.250909	0.749941	0.334571	0.737948	0.999997	AFUA_8G01420	Afu8G01420	Quinone oxidoreductase; putative [Source:UniProtKB/TrEMBL
CADAFUAG00000915	115.207	0.588748	0.526476	1.11828	0.263447	0.999997	AFUA_8G01850	Afu8G01850	Phosphate-repressible phosphate permease; putative [Source:UniProtKB/TrEMBL
CADAFUAG00000916	327.073	-0.00352717	0.361619	-0.00975384	0.992218	0.999997	AFUA_8G01750	Afu8G01750	Acyl-CoA oxidase; putative [Source:UniProtKB/TrEMBL
CADAFUAG00000917	19.0724	-0.3659	1.00697	-0.363367	0.716331	0.999997	AFUA_8G00640	Afu8G00640	Glycosyl transferase; putative [Source:UniProtKB/TrEMBL
CADAFUAG00000918	38.1487	0.444897	0.734879	0.605402	0.544912	0.999997	AFUA_8G02830	Afu8G02830	UPD-GlcNAc transporter (Mnn2-2); putative [Source:UniProtKB/TrEMBL
CADAFUAG00000919	77.3064	-0.186379	0.582279	-0.320085	0.748904	0.999997	AFUA_8G00290	Afu8G00290	Putative uncharacterized protein [Source:UniProtKB/TrEMBL
CADAFUAG00000920	7.12588	-0.982243	1.5514	-0.633131	0.526648	0.999997	AFUA_8G01600	Afu8G01600	Putative uncharacterized protein [Source:UniProtKB/TrEMBL
CADAFUAG00000921	3.93171	-0.412925	2.07673	-0.198834	0.842392	0.999997	AFUA_8G01120	Afu8G01120	Putative uncharacterized protein [Source:UniProtKB/TrEMBL
CADAFUAG00000922	21073.2	0.015491	0.289462	0.0535166	0.95732	0.999997	AFUA_8G02440	Afu8G02440	C-4 methyl sterol oxidase; putative [Source:UniProtKB/TrEMBL
CADAFUAG00000923	55.5354	-0.444504	0.621464	-0.715253	0.474453	0.999997	AFUA_8G01350	Afu8G01350	Putative uncharacterized protein [Source:UniProtKB/TrEMBL
CADAFUAG00000924	31.3786	-0.430194	0.791796	-0.543315	0.586913	0.999997	AFUA_8G00530	Afu8G00530	Alpha/beta hydrolase; putative [Source:UniProtKB/TrEMBL
CADAFUAG00000925	9.50577	0.0111277	1.36205	0.00816983	0.993481	0.999997	AFUA_8G01795	Afu8G01795	Putative uncharacterized protein [Source:UniProtKB/TrEMBL
CADAFUAG00000926	167.791	0.300057	0.444582	0.674918	0.499728	0.999997	AFUA_8G02760	Afu8G02760	Mitochondrial ornithine carrier protein AmcA/Ort1; putative [Source:UniProtKB/TrEMBL
CADAFUAG00000927	20.088	0.125634	0.968003	0.129787	0.896735	0.999997	AFUA_8G00250	Afu8G00250	Dimethylallyl tryptophan synthase; putative [Source:UniProtKB/TrEMBL
CADAFUAG00000928	95.0665	-0.530327	0.527676	-1.00502	0.314885	0.999997	AFUA_8G01480	Afu8G01480	Potassium channel; putative [Source:UniProtKB/TrEMBL
CADAFUAG00000929	0.282951	1.04089	6.11615	0.170187	0.864863	NA	AFUA_8G01450	Afu8G01450	GABA permease; putative [Source:UniProtKB/TrEMBL
CADAFUAG00000930	528.216	0.591142	0.375778	1.57311	0.115692	0.999997	AFUA_8G02860	Afu8G02860	AMP deaminase Amd1; putative [Source:UniProtKB/TrEMBL
CADAFUAG00000931	0	NA	NA	NA	NA	NA	AFUA_8G00220	Afu8G00220	Cytochrome P450; putative [Source:UniProtKB/TrEMBL
CADAFUAG00000932	0	NA	NA	NA	NA	NA	AFUA_8G01510	Afu8G01510	Putative uncharacterized protein [Source:UniProtKB/TrEMBL
CADAFUAG00000933	0.65694	2.16827	5.5718	0.389151	0.697164	NA	AFUA_8G02320	Afu8G02320	Capsule polysaccharide synthase Cps1; putative [Source:UniProtKB/TrEMBL
CADAFUAG00000934	41.0654	0.0450801	0.704181	0.0640178	0.948956	0.999997	AFUA_8G02570	Afu8G02570	Flavin-binding monooxygenase; putative [Source:UniProtKB/TrEMBL
CADAFUAG00000935	75.8147	-0.258294	0.553183	-0.466924	0.640555	0.999997	AFUA_8G01900	Afu8G01900	Putative uncharacterized protein [Source:UniProtKB/TrEMBL
CADAFUAG00000936	7.1056	-0.674797	1.54347	-0.437195	0.66197	0.999997	AFUA_8G02270	Afu8G02270	Dihydrodipicolinate synthetase family protein [Source:UniProtKB/TrEMBL
CADAFUAG00000937	5.77641	-0.0610488	1.77586	-0.034377	0.972577	0.999997	AFUA_8G01520	Afu8G01520	Pectin methylesterase; putative [Source:UniProtKB/TrEMBL
CADAFUAG00000938	18.2888	0.0668454	1.00851	0.0662813	0.947154	0.999997	AFUA_8G01110	Afu8G01110	Integral membrane protein; putative [Source:UniProtKB/TrEMBL
CADAFUAG00000939	878.474	-0.270354	0.341354	-0.792005	0.428358	0.999997	AFUA_8G01970	Afu8G01970	Probable endopolygalacturonase B [Source:UniProtKB/Swiss-Prot
CADAFUAG00000940	90.2634	-0.213933	0.518744	-0.412405	0.680043	0.999997	AFUA_8G02730	Afu8G02730	Translation machinery-associated protein 22 [Source:UniProtKB/Swiss-Prot
CADAFUAG00000941	331.29	0.174427	0.360983	0.4832	0.628954	0.999997	AFUA_8G02100	Afu8G02100	Beta-glucosidase; putative [Source:UniProtKB/TrEMBL
CADAFUAG00000942	0.894372	2.62777	4.52062	0.581285	0.561048	NA	AFUA_8G00400	Afu8G00400	Putative uncharacterized protein [Source:UniProtKB/TrEMBL
CADAFUAG00000943	0	NA	NA	NA	NA	NA	AFUA_8G01620	Afu8G01620	Putative uncharacterized protein [Source:UniProtKB/TrEMBL
CADAFUAG00000944	38.0752	-0.564675	0.735002	-0.768264	0.44233	0.999997	AFUA_8G00850	Afu8G00850	Dihydroorotase; homodimeric type [Source:UniProtKB/TrEMBL
CADAFUAG00000945	667.345	-0.329428	0.326775	-1.00812	0.313398	0.999997	AFUA_8G02520	Afu8G02520	Arylsulfatase; putative [Source:UniProtKB/TrEMBL
CADAFUAG00000946	3.35101	-2.29455	2.43357	-0.942876	0.345744	0.999997	AFUA_8G02410	Afu8G02410	UbiA prenyltransferase family protein [Source:UniProtKB/TrEMBL
CADAFUAG00000947	6.27155	-0.273448	1.65006	-0.16572	0.868377	0.999997	AFUA_8G01530	Afu8G01530	HHE domain protein [Source:UniProtKB/TrEMBL
CADAFUAG00000948	7.07985	0.801714	1.61128	0.497563	0.618792	0.999997	AFUA_8G01650	Afu8G01650	Putative uncharacterized protein [Source:UniProtKB/TrEMBL
CADAFUAG00000949	2.07717	-1.39603	2.7653	-0.504839	0.613672	0.999997	AFUA_8G00500	Afu8G00500	Acetate-CoA ligase; putative [Source:UniProtKB/TrEMBL
CADAFUAG00000950	115.48	-0.138281	0.477031	-0.289878	0.771909	0.999997	AFUA_8G00940	Afu8G00940	MFS multidrug transporter; putative [Source:UniProtKB/TrEMBL
CADAFUAG00000951	2.97702	-2.95521	2.43558	-1.21335	0.224996	0.999997	AFUA_8G02400	Afu8G02400	Geranylgeranyl pyrophosphate synthetase AtmG; putative [Source:UniProtKB/TrEMBL
CADAFUAG00000952	184.225	-0.16674	0.413544	-0.403198	0.686803	0.999997	AFUA_8G02740	Afu8G02740	Putative uncharacterized protein [Source:UniProtKB/TrEMBL
CADAFUAG00000953	0.32847	1.14964	6.11021	0.18815	0.850759	NA	AFUA_8G00160	Afu8G00160	Putative uncharacterized protein [Source:UniProtKB/TrEMBL
CADAFUAG00000954	0.394266	-2.81358	5.94816	-0.473017	0.636201	NA	AFUA_8G01610	Afu8G01610	Putative uncharacterized protein [Source:UniProtKB/TrEMBL
CADAFUAG00000955	5.4079	-1.50332	1.85913	-0.808619	0.418735	0.999997	AFUA_8G00380	Afu8G00380	DltD N-terminal domain protein [Source:UniProtKB/TrEMBL
CADAFUAG00000956	1.96585	-0.412469	2.86317	-0.144061	0.885453	0.999997	AFUA_8G00560	Afu8G00560	Cytochrome P450 oxidoreductase; putative [Source:UniProtKB/TrEMBL
CADAFUAG00000957	1.22284	3.07468	4.01507	0.765784	0.443805	NA	AFUA_8G01060	Afu8G01060	Putative uncharacterized protein [Source:UniProtKB/TrEMBL
CADAFUAG00000958	5.9738	-1.1712	1.699	-0.689344	0.490607	0.999997	AFUA_8G02160	Afu8G02160	Aldehyde dehydrogenase family protein [Source:UniProtKB/TrEMBL
CADAFUAG00000959	340.552	0.303628	0.36071	0.841751	0.399927	0.999997	AFUA_8G01860	Afu8G01860	NmrA-like family protein [Source:UniProtKB/TrEMBL
CADAFUAG00000960	5.72045	0.3997	1.77379	0.225337	0.821717	0.999997	AFUA_8G01790	Afu8G01790	Integral membrane protein; putative [Source:UniProtKB/TrEMBL
CADAFUAG00000961	711.919	-0.173629	0.328357	-0.528781	0.596958	0.999997	AFUA_8G02190	Afu8G02190	Putative uncharacterized protein [Source:UniProtKB/TrEMBL
CADAFUAG00000962	2.03165	-1.45469	3.01132	-0.483072	0.629045	0.999997	AFUA_8G00210	Afu8G00210	Dimethylallyl tryptophan synthase FtmPT1 [Source:UniProtKB/TrEMBL
CADAFUAG00000963	3.87139	-1.64804	2.0643	-0.798356	0.424664	0.999997	AFUA_8G01280	Afu8G01280	Epsilon-lactone hydrolase; putative [Source:UniProtKB/TrEMBL
CADAFUAG00000964	2783.42	-0.478928	0.328787	-1.45665	0.145212	0.999997	AFUA_8G00830	Afu8G00830	Putative uncharacterized protein [Source:UniProtKB/TrEMBL
CADAFUAG00000965	28.4827	-0.505299	0.817439	-0.618148	0.536478	0.999997	AFUA_8G00360	Afu8G00360	NlpC/P60-like cell-wall peptidase; putative [Source:UniProtKB/TrEMBL
CADAFUAG00000966	3.96243	-1.58429	2.1016	-0.753847	0.450941	0.999997	AFUA_8G01920	Afu8G01920	Putative uncharacterized protein [Source:UniProtKB/TrEMBL
CADAFUAG00000967	1.28864	0.18686	3.52071	0.0530746	0.957672	NA	AFUA_8G01140	Afu8G01140	C6 transcription factor; putative [Source:UniProtKB/TrEMBL
CADAFUAG00000968	22.7618	-0.196431	0.91568	-0.214519	0.830142	0.999997	AFUA_8G01960	Afu8G01960	Putative uncharacterized protein [Source:UniProtKB/TrEMBL
CADAFUAG00000969	3.23422	0.631701	2.31644	0.272704	0.785081	0.999997	AFUA_8G02030	Afu8G02030	Putative uncharacterized protein [Source:UniProtKB/TrEMBL
CADAFUAG00000970	114.334	0.494757	0.491799	1.00602	0.314408	0.999997	AFUA_8G02870	Afu8G02870	Putative uncharacterized protein [Source:UniProtKB/TrEMBL
CADAFUAG00000971	15.439	-0.158876	1.09901	-0.144563	0.885056	0.999997	AFUA_8G00860	Afu8G00860	UDP-galactose 4-epimerase; putative [Source:UniProtKB/TrEMBL
CADAFUAG00000972	4.19986	-1.36896	1.97888	-0.691785	0.489073	0.999997	AFUA_8G00890	Afu8G00890	MFS glucose transporter; putative [Source:UniProtKB/TrEMBL
CADAFUAG00000973	1.37968	0.305379	3.72257	0.0820346	0.934619	NA	AFUA_8G00550	Afu8G00550	Methyltransferase SirN-like; putative [Source:UniProtKB/TrEMBL
CADAFUAG00000974	3.85111	-1.07814	2.08041	-0.518236	0.604294	0.999997	AFUA_8G01210	Afu8G01210	Enoyl-CoA hydratase/isomerase family protein [Source:UniProtKB/TrEMBL
CADAFUAG00000975	35.2045	-0.569154	0.748404	-0.76049	0.446961	0.999997	AFUA_8G02630	Afu8G02630	Probable exopolygalacturonase B [Source:UniProtKB/Swiss-Prot
CADAFUAG00000976	1.63738	-0.873169	3.33286	-0.261988	0.793331	0.999997	AFUA_8G00120	Afu8G00120	Putative uncharacterized protein [Source:UniProtKB/TrEMBL
CADAFUAG00000977	15.5454	-0.600989	1.07178	-0.560738	0.574976	0.999997	AFUA_8G00420	Afu8G00420	C6 finger transcription factor; putative [Source:UniProtKB/TrEMBL
CADAFUAG00000978	253.506	-0.126701	0.384246	-0.329738	0.741598	0.999997	AFUA_8G01910	Afu8G01910	Histidine acid phosphatase; putative [Source:UniProtKB/TrEMBL
CADAFUAG00000979	24.2072	-0.264273	0.894791	-0.295346	0.76773	0.999997	AFUA_8G01222	Afu8G01222	NRPS-like enzyme; putative [Source:UniProtKB/TrEMBL
CADAFUAG00000980	0.722736	-1.30454	4.8333	-0.269907	0.787232	NA	AFUA_8G00595	Afu8G00595	Ham1 family pyrophosphatase; putative [Source:UniProtKB/TrEMBL
CADAFUAG00000981	3.34553	-0.133565	2.22715	-0.0599713	0.952178	0.999997	AFUA_8G01590	Afu8G01590	Putative uncharacterized protein [Source:UniProtKB/TrEMBL
CADAFUAG00000982	13.2253	0.0333449	1.1699	0.0285023	0.977262	0.999997	AFUA_8G00150	Afu8G00150	Putative uncharacterized protein [Source:UniProtKB/TrEMBL
CADAFUAG00000983	0.939891	2.69082	4.44503	0.605353	0.544944	NA	AFUA_8G01640	Afu8G01640	NRPS-like enzyme; putative [Source:UniProtKB/TrEMBL
CADAFUAG00000984	23.1346	0.54322	0.919991	0.590462	0.554881	0.999997	AFUA_8G01270	Afu8G01270	Beta-lactamase; putative [Source:UniProtKB/TrEMBL
CADAFUAG00000985	23.95	-0.682655	0.896769	-0.761239	0.446515	0.999997	AFUA_8G02300	Afu8G02300	FMN-dependent dehydrogenase family protein [Source:UniProtKB/TrEMBL
CADAFUAG00000986	116.109	-0.359643	0.488814	-0.735746	0.461885	0.999997	AFUA_8G00800	Afu8G00800	Amino acid transporter; putative [Source:UniProtKB/TrEMBL
CADAFUAG00000987	34.5471	-0.275569	0.762468	-0.361417	0.717788	0.999997	AFUA_8G00670	Afu8G00670	Integral membrane protein [Source:UniProtKB/TrEMBL
CADAFUAG00000988	2598.01	-0.195224	0.295647	-0.660328	0.509043	0.999997	AFUA_8G01340	Afu8G01340	MFS sugar transporter; putative [Source:UniProtKB/TrEMBL
CADAFUAG00000989	12.3259	-0.506109	1.20137	-0.421276	0.673554	0.999997	AFUA_8G01310	Afu8G01310	Ferric-chelate reductase (Fre2); putative [Source:UniProtKB/TrEMBL
CADAFUAG00000990	5.61958	0.352834	1.77806	0.198438	0.842702	0.999997	AFUA_8G00390	Afu8G00390	O-methyltransferase; putative [Source:UniProtKB/TrEMBL
CADAFUAG00000991	0	NA	NA	NA	NA	NA	AFUA_8G00100	Afu8G00100	Aspartate-tRNA ligase; putative [Source:UniProtKB/TrEMBL
CADAFUAG00000992	2.20825	3.92224	3.32867	1.17832	0.238669	0.999997	AFUA_8G00230	Afu8G00230	Phytanoyl-CoA dioxygenase family protein [Source:UniProtKB/TrEMBL
CADAFUAG00000993	0.894372	2.62777	4.52062	0.581285	0.561048	NA	AFUA_8G02330	Afu8G02330	Endoglucanase; putative [Source:UniProtKB/TrEMBL
CADAFUAG00000994	1.26836	3.12136	4.00219	0.779912	0.435443	NA	AFUA_8G01470	Afu8G01470	Flavin containing amine oxidase; putative [Source:UniProtKB/TrEMBL
CADAFUAG00000995	561.851	-0.411066	0.332518	-1.23622	0.216376	0.999997	AFUA_8G00950	Afu8G00950	Putative uncharacterized protein [Source:UniProtKB/TrEMBL
CADAFUAG00000996	53.2345	-0.0465228	0.633688	-0.073416	0.941475	0.999997	AFUA_8G00720	Afu8G00720	Amino acid transporter; putative [Source:UniProtKB/TrEMBL
CADAFUAG00000997	344.616	0.208529	0.358263	0.582056	0.560529	0.999997	AFUA_8G02800	Afu8G02800	Putative uncharacterized protein [Source:UniProtKB/TrEMBL
CADAFUAG00000998	165.854	-0.497885	0.434223	-1.14661	0.251542	0.999997	AFUA_8G02280	Afu8G02280	C6 transcription factor; putative [Source:UniProtKB/TrEMBL
CADAFUAG00000999	153.408	-0.6357	0.44796	-1.4191	0.15587	0.999997	AFUA_8G01700	Afu8G01700	Haloalkane dehalogenase family protein [Source:UniProtKB/TrEMBL
CADAFUAG00001000	1262.63	-0.374139	0.361321	-1.03547	0.300447	0.999997	AFUA_8G00280	Afu8G00280	Short-chain dehydrogenase; putative [Source:UniProtKB/TrEMBL
CADAFUAG00001001	913.368	-0.115387	0.315227	-0.366044	0.714332	0.999997	AFUA_8G01260	Afu8G01260	Putative uncharacterized protein [Source:UniProtKB/TrEMBL
CADAFUAG00001002	0.394266	-2.81358	5.94816	-0.473017	0.636201	NA	AFUA_8G00990	Afu8G00990	F-box domain protein [Source:UniProtKB/TrEMBL
CADAFUAG00001003	1.17732	3.0265	4.09562	0.738959	0.459932	NA	AFUA_8G01020	Afu8G01020	HET domain protein [Source:UniProtKB/TrEMBL
CADAFUAG00001004	2.557	1.45217	2.73103	0.53173	0.594913	0.999997	AFUA_8G01050	Afu8G01050	Lipase/esterase; putative [Source:UniProtKB/TrEMBL
CADAFUAG00001005	1.00569	-0.368647	3.89257	-0.0947054	0.924549	NA	AFUA_8G00520	Afu8G00520	Integral membrane protein [Source:UniProtKB/TrEMBL
CADAFUAG00001006	975.843	-0.302911	0.361428	-0.838096	0.401977	0.999997	AFUA_8G02430	Afu8G02430	Zinc-binding alcohol dehydrogenase; putative [Source:UniProtKB/TrEMBL
CADAFUAG00001007	52.4262	-0.174566	0.638554	-0.273377	0.784564	0.999997	AFUA_8G01840	Afu8G01840	Putative uncharacterized protein [Source:UniProtKB/TrEMBL
CADAFUAG00001008	487.883	-0.157529	0.336644	-0.467941	0.639827	0.999997	AFUA_8G02810	Afu8G02810	ELMO/CED-12 family protein [Source:UniProtKB/TrEMBL
CADAFUAG00001009	11.2051	-2.01936	1.26784	-1.59277	0.111213	0.999997	AFUA_8G02020	Afu8G02020	Glycosyltransferase; putative [Source:UniProtKB/TrEMBL
CADAFUAG00001010	38.55	-0.532331	0.721578	-0.737731	0.460678	0.999997	AFUA_8G02070	Afu8G02070	Glycosyl transferase; putative [Source:UniProtKB/TrEMBL
CADAFUAG00001011	174.781	-0.0635991	0.459678	-0.138356	0.889959	0.999997	AFUA_8G00170	Afu8G00170	Nonribosomal peptide synthetase 13 [Source:UniProtKB/Swiss-Prot
CADAFUAG00001012	0.722736	-1.30454	4.8333	-0.269907	0.787232	NA	AFUA_8G01540	Afu8G01540	Putative uncharacterized protein [Source:UniProtKB/TrEMBL
CADAFUAG00001013	2051.96	-0.207727	0.30854	-0.673256	0.500785	0.999997	AFUA_8G00460	Afu8G00460	Methionine aminopeptidase [Source:UniProtKB/TrEMBL
CADAFUAG00001014	21.0679	0.635414	0.964718	0.658653	0.510119	0.999997	AFUA_8G00690	Afu8G00690	Putative uncharacterized protein [Source:UniProtKB/TrEMBL
CADAFUAG00001015	9.31386	-0.0375055	1.37875	-0.0272025	0.978298	0.999997	AFUA_8G01100	Afu8G01100	Melibiase subfamily; putative [Source:UniProtKB/TrEMBL
CADAFUAG00001016	2.60252	1.47806	2.741	0.539241	0.58972	0.999997	AFUA_8G02380	Afu8G02380	FAD-dependent monooxygenase; putative [Source:UniProtKB/TrEMBL
CADAFUAG00001017	30.3641	-1.19133	0.80501	-1.4799	0.1389	0.999997	AFUA_8G00200	Afu8G00200	O-methyltransferase; putative [Source:UniProtKB/TrEMBL
CADAFUAG00001018	37.7588	0.748023	0.759554	0.984818	0.324713	0.999997	AFUA_8G02710	Afu8G02710	C6 transcription factor; putative [Source:UniProtKB/TrEMBL
CADAFUAG00001019	23.1966	-0.46347	0.895469	-0.517572	0.604757	0.999997	AFUA_8G02510	Afu8G02510	Glycosyl hydrolase family 43 protein [Source:UniProtKB/TrEMBL
CADAFUAG00001020	91.7977	0.102736	0.518228	0.198244	0.842854	0.999997	AFUA_8G02560	Afu8G02560	Glyceraldehyde-3-phosphate dehydrogenase; putative [Source:UniProtKB/TrEMBL
CADAFUAG00001021	2.95126	0.451774	2.40581	0.187785	0.851045	0.999997	AFUA_8G01430	Afu8G01430	Oxidoreductase; zinc-binding dehydrogenase family; putative [Source:UniProtKB/TrEMBL
CADAFUAG00001022	41.396	1.18267	0.801597	1.47539	0.140107	0.999997	AFUA_8G00600	Afu8G00600	NAD dependent epimerase/dehydratase family protein [Source:UniProtKB/TrEMBL
CADAFUAG00001023	70.5149	-0.498733	0.567484	-0.878849	0.379483	0.999997	AFUA_8G00342	Afu8G00342	Putative uncharacterized protein [Source:UniProtKB/TrEMBL
CADAFUAG00001024	979.417	0.0130926	0.31041	0.0421786	0.966356	0.999997	AFUA_7G01520	Afu7G01520	BolA domain protein [Source:UniProtKB/TrEMBL
CADAFUAG00001025	4617.82	0.46528	0.287259	1.61972	0.105292	0.999997	AFUA_7G00700	Afu7G00700	Aldo-keto reductase (AKR13); puatative [Source:UniProtKB/TrEMBL
CADAFUAG00001026	0	NA	NA	NA	NA	NA	AFUA_7G02330	Afu7G02330
CADAFUAG00001027	0.722736	-1.30454	4.8333	-0.269907	0.787232	NA	AFUA_7G00900	Afu7G00900	Putative uncharacterized protein [Source:UniProtKB/TrEMBL
CADAFUAG00001028	5988.93	0.00906318	0.307684	0.0294561	0.976501	0.999997	AFUA_7G01490	Afu7G01490	MFS peptide transporter Ptr2; putative [Source:UniProtKB/TrEMBL
CADAFUAG00001029	186.854	0.154543	0.43186	0.357853	0.720453	0.999997	AFUA_7G02140	Afu7G02140	40S ribosomal protein S24 [Source:UniProtKB/TrEMBL
CADAFUAG00001030	218.214	0.37617	0.411076	0.915086	0.360147	0.999997	AFUA_7G01810	Afu7G01810	C6 transcription factor; putative [Source:UniProtKB/TrEMBL
CADAFUAG00001031	791.555	-0.929514	0.372809	-2.49327	0.0126573	0.935464	AFUA_7G01695	Afu7G01695	Putative uncharacterized protein [Source:UniProtKB/TrEMBL
CADAFUAG00001032	0.32847	1.14964	6.11021	0.18815	0.850759	NA	AFUA_7G00190	Afu7G00190	Putative uncharacterized protein [Source:UniProtKB/TrEMBL
CADAFUAG00001033	1004.39	-0.184583	0.310522	-0.594428	0.552226	0.999997	AFUA_7G02630	Afu7G02630	Putative uncharacterized protein [Source:UniProtKB/TrEMBL
CADAFUAG00001034	1383.66	0.0403587	0.30804	0.131018	0.895761	0.999997	AFUA_7G01640	Afu7G01640	C6 transcription factor (War1); putative [Source:UniProtKB/TrEMBL
CADAFUAG00001035	110.226	0.931734	0.520561	1.78987	0.0734755	0.999997	AFUA_7G01050	Afu7G01050	Salicylate hydroxylase; putative [Source:UniProtKB/TrEMBL
CADAFUAG00001036	47.2771	-0.365483	0.661244	-0.552721	0.580455	0.999997	AFUA_7G01210	Afu7G01210	Putative uncharacterized protein [Source:UniProtKB/TrEMBL
CADAFUAG00001037	951.446	0.439607	0.311104	1.41305	0.15764	0.999997	AFUA_7G01510	Afu7G01510	SNARE domain protein [Source:UniProtKB/TrEMBL
CADAFUAG00001038	102.563	-0.129327	0.496341	-0.260561	0.794431	0.999997	AFUA_7G02000	Afu7G02000	Leucine Rich Repeat domain protein [Source:UniProtKB/TrEMBL
CADAFUAG00001039	1898.2	-0.341502	0.324179	-1.05344	0.29214	0.999997	AFUA_7G01260	Afu7G01260	Putative uncharacterized protein [Source:UniProtKB/TrEMBL
CADAFUAG00001040	584.553	0.031636	0.327537	0.0965875	0.923054	0.999997	AFUA_7G02470	Afu7G02470	mRNA processing protein (Mss51); putative [Source:UniProtKB/TrEMBL
CADAFUAG00001041	3.58296	0.0243004	2.16275	0.0112359	0.991035	0.999997	AFUA_7G00810	Afu7G00810	Putative uncharacterized protein [Source:UniProtKB/TrEMBL
CADAFUAG00001042	18.3288	0.524363	1.02126	0.513447	0.607639	0.999997	AFUA_7G01970	Afu7G01970	RTA1 domain protein; putative [Source:UniProtKB/TrEMBL
CADAFUAG00001043	56.3892	-0.323622	0.623161	-0.519324	0.603535	0.999997	AFUA_7G00600	Afu7G00600	Hydrolase; CocE/NonD family; putative [Source:UniProtKB/TrEMBL
CADAFUAG00001044	106.983	0.606074	0.548828	1.10431	0.26946	0.999997	AFUA_7G01070	Afu7G01070	Endo-1;4-beta-mannosidase [Source:UniProtKB/TrEMBL
CADAFUAG00001045	14133.6	-0.220156	0.305725	-0.720111	0.471457	0.999997	AFUA_7G01860	Afu7G01860	Heat shock protein (Sti1); putative [Source:UniProtKB/TrEMBL
CADAFUAG00001046	279.197	-0.328259	0.381276	-0.860949	0.389266	0.999997	AFUA_7G00580	Afu7G00580	Putative uncharacterized protein [Source:UniProtKB/TrEMBL
CADAFUAG00001047	105.894	-0.176767	0.489141	-0.361383	0.717813	0.999997	AFUA_7G01590	Afu7G01590	Cystathionine gamma-synthase [Source:UniProtKB/TrEMBL
CADAFUAG00001048	11.5884	-0.862655	1.22573	-0.70379	0.481564	0.999997	AFUA_7G01550	Afu7G01550	Mitochondrial exoribonuclease Cyt-4; putative [Source:UniProtKB/TrEMBL
CADAFUAG00001049	5.31635	0.796126	1.90906	0.417026	0.676659	0.999997	AFUA_7G00830	Afu7G00830	Alpha/beta hydrolase; putative [Source:UniProtKB/TrEMBL
CADAFUAG00001050	5638.26	-0.464832	0.290231	-1.60159	0.109246	0.999997	AFUA_7G00340	Afu7G00340	Metallo-beta-lactamase domain protein; putative [Source:UniProtKB/TrEMBL
CADAFUAG00001051	423.418	0.141021	0.346573	0.4069	0.684081	0.999997	AFUA_7G00770	Afu7G00770	C6 transcription factor; putative [Source:UniProtKB/TrEMBL
CADAFUAG00001052	3.08286	-1.0636	2.28753	-0.464957	0.641962	0.999997	AFUA_7G01170	Afu7G01170	Putative uncharacterized protein [Source:UniProtKB/TrEMBL
CADAFUAG00001053	15.7263	0.396004	1.09842	0.36052	0.718458	0.999997	AFUA_7G01730	Afu7G01730	Phosphatidylserine decarboxylase family protein [Source:UniProtKB/TrEMBL
CADAFUAG00001054	667.028	-0.195996	0.331581	-0.591095	0.554457	0.999997	AFUA_7G02570	Afu7G02570	NIMA-interacting protein TinC [Source:UniProtKB/TrEMBL
CADAFUAG00001055	2419.51	-0.395677	0.291474	-1.35751	0.17462	0.999997	AFUA_7G01780	Afu7G01780	Putative uncharacterized protein [Source:UniProtKB/TrEMBL
CADAFUAG00001056	22.1652	-0.0312299	0.921489	-0.0338907	0.972964	0.999997	AFUA_7G01880	Afu7G01880	Nicotinate phosphoribosyltransferase [Source:UniProtKB/TrEMBL
CADAFUAG00001057	366.162	0.0463636	0.353907	0.131005	0.895771	0.999997	AFUA_7G00280	Afu7G00280	Putative uncharacterized protein [Source:UniProtKB/TrEMBL
CADAFUAG00001058	29.7194	0.671442	0.827031	0.81187	0.416866	0.999997	AFUA_7G02300	Afu7G02300	Putative uncharacterized protein [Source:UniProtKB/TrEMBL
CADAFUAG00001059	186.35	0.0775939	0.416545	0.18628	0.852225	0.999997	AFUA_7G02560	Afu7G02560	D-lactate dehydrogenase (Cytochrome) [Source:UniProtKB/TrEMBL
CADAFUAG00001060	6.19096	-0.693106	1.66682	-0.415825	0.677538	0.999997	AFUA_7G00290	Afu7G00290	Cytochrome P450 monooxygenase; putative [Source:UniProtKB/TrEMBL
CADAFUAG00001061	66.4932	0.459999	0.595609	0.772317	0.439927	0.999997	AFUA_7G02285	Afu7G02285	Putative uncharacterized protein [Source:UniProtKB/TrEMBL
CADAFUAG00001062	26.3749	0.122907	0.893328	0.137583	0.89057	0.999997	AFUA_7G00420	Afu7G00420	Putative uncharacterized protein [Source:UniProtKB/TrEMBL
CADAFUAG00001063	354.801	0.13874	0.359236	0.386208	0.699343	0.999997	AFUA_7G01690	Afu7G01690	Acetamidase; putative [Source:UniProtKB/TrEMBL
CADAFUAG00001064	546.275	-0.148874	0.350004	-0.425351	0.670581	0.999997	AFUA_7G00250	Afu7G00250	Tubulin beta chain [Source:UniProtKB/Swiss-Prot
CADAFUAG00001065	262.977	0.0723374	0.380169	0.190277	0.849092	0.999997	AFUA_7G01310	Afu7G01310	C6 transcription factor; putative [Source:UniProtKB/TrEMBL
CADAFUAG00001066	112.914	0.320068	0.520091	0.615409	0.538285	0.999997	AFUA_7G02620	Afu7G02620	DNA-directed RNA polymerases N/8 kDa subunit superfamily [Source:UniProtKB/TrEMBL
CADAFUAG00001067	3391.76	-0.248789	0.2981	-0.834582	0.403953	0.999997	AFUA_7G01240	Afu7G01240	Phytase; putative [Source:UniProtKB/TrEMBL
CADAFUAG00001068	21.4336	-1.08852	0.925339	-1.17635	0.239455	0.999997	AFUA_7G02130	Afu7G02130	Putative uncharacterized protein [Source:UniProtKB/TrEMBL
CADAFUAG00001069	3317.42	-0.356508	0.291013	-1.22506	0.220554	0.999997	AFUA_7G01430	Afu7G01430	Opsin; putative [Source:UniProtKB/TrEMBL
CADAFUAG00001070	180.763	0.528354	0.42147	1.2536	0.209988	0.999997	AFUA_7G00690	Afu7G00690	Aminotransferase; putative [Source:UniProtKB/TrEMBL
CADAFUAG00001071	49.0095	0.236512	0.666738	0.354731	0.722791	0.999997	AFUA_7G02070	Afu7G02070	AIF-like mitochondrial oxidoreductase (Nfrl); putative [Source:UniProtKB/TrEMBL
CADAFUAG00001072	2195.26	-0.462349	0.302126	-1.53032	0.125938	0.999997	AFUA_7G02220	Afu7G02220	Putative uncharacterized protein [Source:UniProtKB/TrEMBL
CADAFUAG00001073	1397.39	-0.0863549	0.300374	-0.287492	0.773736	0.999997	AFUA_7G01610	Afu7G01610	Integral membrane protein [Source:UniProtKB/TrEMBL
CADAFUAG00001074	298.164	-0.0767048	0.378397	-0.20271	0.839362	0.999997	AFUA_7G02240	Afu7G02240	Putative uncharacterized protein [Source:UniProtKB/TrEMBL
CADAFUAG00001075	169.799	0.821508	0.43258	1.89909	0.0575528	0.999997	AFUA_7G00210	Afu7G00210	C6 transcription factor; putative [Source:UniProtKB/TrEMBL
CADAFUAG00001076	386.295	0.386855	0.352139	1.09859	0.271949	0.999997	AFUA_7G02440	Afu7G02440	Conserved glycine-rich protein [Source:UniProtKB/TrEMBL
CADAFUAG00001077	25.5403	0.379015	0.874746	0.433286	0.664807	0.999997	AFUA_7G01370	Afu7G01370	Thiosulfate sulfurtransferase; putative [Source:UniProtKB/TrEMBL
CADAFUAG00001078	43.6295	-0.671266	0.690042	-0.972789	0.330658	0.999997	AFUA_7G01660	Afu7G01660	Polyketide synthase; putative [Source:UniProtKB/TrEMBL
CADAFUAG00001079	1152.98	0.520138	0.305143	1.70457	0.0882748	0.999997	AFUA_7G01920	Afu7G01920	DNA-directed RNA polymerase [Source:UniProtKB/TrEMBL
CADAFUAG00001080	14.9635	-0.0547846	1.11778	-0.0490119	0.96091	0.999997	AFUA_7G01440	Afu7G01440	Putative uncharacterized protein [Source:UniProtKB/TrEMBL
CADAFUAG00001081	86.7199	-0.1068	0.525361	-0.203288	0.83891	0.999997	AFUA_7G01710	Afu7G01710	Cholinesterase; putative [Source:UniProtKB/TrEMBL
CADAFUAG00001082	83.9441	-0.746049	0.549576	-1.3575	0.174623	0.999997	AFUA_7G00090	Afu7G00090	Telomere-associated RecQ helicase; putative [Source:UniProtKB/TrEMBL
CADAFUAG00001083	6303.46	0.460539	0.284122	1.62092	0.105036	0.999997	AFUA_7G02260	Afu7G02260	cAMP-dependent protein kinase pathway protein (Som1); putative [Source:UniProtKB/TrEMBL
CADAFUAG00001084	7.59091	-0.81838	1.51118	-0.541552	0.588127	0.999997	AFUA_7G00110	Afu7G00110	Secretory lipase; putative [Source:UniProtKB/TrEMBL
CADAFUAG00001085	3.91691	-1.61634	2.05939	-0.784866	0.432532	0.999997	AFUA_7G00160	Afu7G00160	Polyketide synthase; putative [Source:UniProtKB/TrEMBL
CADAFUAG00001086	222.933	0.0407626	0.397936	0.102435	0.918411	0.999997	AFUA_7G00970	Afu7G00970	GPI anchored serine-threonine rich protein [Source:UniProtKB/TrEMBL
CADAFUAG00001087	485.452	0.141235	0.345914	0.408296	0.683056	0.999997	AFUA_7G02500	Afu7G02500	Polysaccharide synthase Cps1; putative [Source:UniProtKB/TrEMBL
CADAFUAG00001088	339.06	0.848439	0.389203	2.17994	0.029262	0.999997	AFUA_7G02190	Afu7G02190	Zinc knuckle nucleic acid binding protein; putative [Source:UniProtKB/TrEMBL
CADAFUAG00001089	663.44	0.275247	0.323738	0.850217	0.395204	0.999997	AFUA_7G02100	Afu7G02100	Putative uncharacterized protein [Source:UniProtKB/TrEMBL
CADAFUAG00001090	139.329	0.342722	0.464381	0.738019	0.460503	0.999997	AFUA_7G01350	Afu7G01350	Putative uncharacterized protein [Source:UniProtKB/TrEMBL
CADAFUAG00001091	528.613	-0.0583407	0.333666	-0.174848	0.861199	0.999997	AFUA_7G02050	Afu7G02050	Arrestin (Or S-antigen); N-terminal domain protein [Source:UniProtKB/TrEMBL
CADAFUAG00001092	7290.05	-0.166758	0.289547	-0.575926	0.564665	0.999997	AFUA_7G00350	Afu7G00350	Putative uncharacterized protein [Source:UniProtKB/TrEMBL
CADAFUAG00001093	28.0655	1.45593	0.920503	1.58167	0.113725	0.999997	AFUA_7G01680	Afu7G01680	Putative uncharacterized protein [Source:UniProtKB/TrEMBL
CADAFUAG00001094	158.141	0.244234	0.441464	0.553237	0.580101	0.999997	AFUA_7G00390	Afu7G00390	MFS multidrug transporter; putative [Source:UniProtKB/TrEMBL
CADAFUAG00001095	31.8162	0.511039	0.823072	0.620892	0.534671	0.999997	AFUA_7G02280	Afu7G02280	U5 snRNP complex subunit; putative [Source:UniProtKB/TrEMBL
CADAFUAG00001096	6128.75	0.340336	0.284091	1.19798	0.230924	0.999997	AFUA_7G00950	Afu7G00950	MFS monosaccharide transporter; putative [Source:UniProtKB/TrEMBL
CADAFUAG00001097	136.267	0.278397	0.492005	0.565843	0.571501	0.999997	AFUA_7G00805	Afu7G00805	Putative uncharacterized protein [Source:UniProtKB/TrEMBL
CADAFUAG00001098	2863.69	-0.109483	0.297507	-0.368003	0.712871	0.999997	AFUA_7G00940	Afu7G00940	Isoamyl alcohol oxidase; putative [Source:UniProtKB/TrEMBL
CADAFUAG00001099	15.2164	0.144889	1.10625	0.130973	0.895797	0.999997	AFUA_7G01010	Afu7G01010	Alcohol dehydrogenase; putative [Source:UniProtKB/TrEMBL
CADAFUAG00001100	57.9991	0.138742	0.630386	0.22009	0.825801	0.999997	AFUA_7G01940	Afu7G01940	Nuclear pore complex subunit Nup85; putative [Source:UniProtKB/TrEMBL
CADAFUAG00001101	1.57159	0.58612	3.27381	0.179033	0.857912	0.999997	AFUA_7G00310	Afu7G00310	Putative uncharacterized protein [Source:UniProtKB/TrEMBL
CADAFUAG00001102	0.32847	1.14964	6.11021	0.18815	0.850759	NA	AFUA_7G00490	Afu7G00490	Putative uncharacterized protein [Source:UniProtKB/TrEMBL
CADAFUAG00001103	2872.49	0.686625	0.323201	2.12446	0.0336321	0.999997	AFUA_7G01830	Afu7G01830	UTP-glucose-1-phosphate uridylyltransferase Ugp1; putative [Source:UniProtKB/TrEMBL
CADAFUAG00001104	318.954	0.178061	0.367368	0.484695	0.627893	0.999997	AFUA_7G01460	Afu7G01460	Ribosomal protein S5 [Source:UniProtKB/TrEMBL
CADAFUAG00001105	9.89456	0.672284	1.3697	0.490825	0.62355	0.999997	AFUA_7G00270	Afu7G00270	FAD binding monooxygenase; putative [Source:UniProtKB/TrEMBL
CADAFUAG00001106	2.3146	-1.04292	2.85756	-0.364967	0.715136	0.999997	AFUA_7G00840	Afu7G00840	Short chain dehydrogenase/reductase; putative [Source:UniProtKB/TrEMBL
CADAFUAG00001107	612.303	-0.273585	0.326169	-0.838783	0.401591	0.999997	AFUA_7G01410	Afu7G01410	UPF0183 domain protein [Source:UniProtKB/TrEMBL
CADAFUAG00001108	2414.57	-0.634435	0.311334	-2.03779	0.0415706	0.999997	AFUA_7G02340	Afu7G02340	L-PSP endoribonuclease family protein (Hmf1); putative [Source:UniProtKB/TrEMBL
CADAFUAG00001109	613.135	0.383177	0.327118	1.17137	0.24145	0.999997	AFUA_7G02370	Afu7G02370	Helicase swr1 [Source:UniProtKB/Swiss-Prot
CADAFUAG00001110	31.479	-0.0329474	0.791343	-0.0416349	0.96679	0.999997	AFUA_7G00440	Afu7G00440	GABA permease; putative [Source:UniProtKB/TrEMBL
CADAFUAG00001111	3.45685	-0.755511	2.18983	-0.345009	0.730088	0.999997	AFUA_7G00870	Afu7G00870	RNA exonuclease; putative [Source:UniProtKB/TrEMBL
CADAFUAG00001112	107.819	-0.0449651	0.495021	-0.0908348	0.927624	0.999997	AFUA_7G01180	Afu7G01180	Extracellular lipase; putative [Source:UniProtKB/TrEMBL
CADAFUAG00001113	118.497	0.694762	0.503372	1.38022	0.16752	0.999997	AFUA_7G01540	Afu7G01540	Probable endo-beta-1;4-glucanase celB [Source:UniProtKB/Swiss-Prot
CADAFUAG00001114	159.787	-0.173174	0.449681	-0.385104	0.700161	0.999997	AFUA_7G01570	Afu7G01570	Putative uncharacterized protein [Source:UniProtKB/TrEMBL
CADAFUAG00001115	1.66263	0.675995	3.22094	0.209875	0.833765	0.999997	AFUA_7G00890	Afu7G00890	Putative uncharacterized protein [Source:UniProtKB/TrEMBL
CADAFUAG00001116	45.5405	0.859643	0.730061	1.17749	0.238998	0.999997	AFUA_7G01150	Afu7G01150	LipA and NB-ARC domain protein [Source:UniProtKB/TrEMBL
CADAFUAG00001117	406.944	-0.11791	0.347898	-0.338921	0.734669	0.999997	AFUA_7G01400	Afu7G01400	Kinesin family protein (BimC); putative [Source:UniProtKB/TrEMBL
CADAFUAG00001118	1.61711	0.631642	3.21409	0.196523	0.844201	0.999997	AFUA_7G00670	Afu7G00670	Chitin binding domain protein Peritrophin-A; putative [Source:UniProtKB/TrEMBL
CADAFUAG00001119	2.36509	1.30867	3.1014	0.42196	0.673054	0.999997	AFUA_7G01760	Afu7G01760	Putative uncharacterized protein [Source:UniProtKB/TrEMBL
CADAFUAG00001120	47.315	0.717349	0.680072	1.05481	0.291511	0.999997	AFUA_7G02400	Afu7G02400	Alcohol dehydrogenase; zinc-containing [Source:UniProtKB/TrEMBL
CADAFUAG00001121	24.4748	-0.331176	0.883866	-0.37469	0.707891	0.999997	AFUA_7G00640	Afu7G00640	Aromatic ring-opening dioxygenase family protein [Source:UniProtKB/TrEMBL
CADAFUAG00001122	0	NA	NA	NA	NA	NA	AFUA_7G00860	Afu7G00860	Lipoxygenase; putative [Source:UniProtKB/TrEMBL
CADAFUAG00001123	2.49668	-0.868059	2.79264	-0.310838	0.755924	0.999997	AFUA_7G01190	Afu7G01190	MFS transporter; putative [Source:UniProtKB/TrEMBL
CADAFUAG00001124	2.57728	0.186636	2.54268	0.0734016	0.941487	0.999997	AFUA_7G00620	Afu7G00620	Putative uncharacterized protein [Source:UniProtKB/TrEMBL
CADAFUAG00001125	297.436	-1.28376	0.381619	-3.36399	0.000768243	0.218397	AFUA_7G00730	Afu7G00730	High affinity methionine permease [Source:UniProtKB/TrEMBL
CADAFUAG00001126	1.05121	-0.282201	4.12871	-0.0683509	0.945506	NA
CADAFUAG00001127	113.482	-0.435847	0.508035	-0.857907	0.390944	0.999997	AFUA_7G00530	Afu7G00530	NACHT and Ankyrin domain protein [Source:UniProtKB/TrEMBL
CADAFUAG00001128	34.1686	-0.775672	0.756977	-1.0247	0.305506	0.999997	AFUA_7G00740	Afu7G00740	Protein kinase; putative [Source:UniProtKB/TrEMBL
CADAFUAG00001129	144.907	0.777076	0.451829	1.71985	0.0854605	0.999997	AFUA_7G01040	Afu7G01040	Cytidine deaminase; putative [Source:UniProtKB/TrEMBL
CADAFUAG00001130	8.32845	-0.286176	1.43938	-0.19882	0.842404	0.999997	AFUA_7G00710	Afu7G00710	Oxalate/formate antiporter; putative [Source:UniProtKB/TrEMBL
CADAFUAG00001131	1.05121	-0.282201	4.12871	-0.0683509	0.945506	NA	AFUA_7G00590	Afu7G00590	Salicylate hydroxylase; putative [Source:UniProtKB/TrEMBL
CADAFUAG00001132	525.848	-0.0266167	0.335935	-0.0792315	0.936849	0.999997	AFUA_7G00760	Afu7G00760	Phosphoglycolate phosphatase; putative [Source:UniProtKB/TrEMBL
CADAFUAG00001133	213.03	0.0848191	0.423128	0.200458	0.841123	0.999997	AFUA_7G00460	Afu7G00460	Putative uncharacterized protein [Source:UniProtKB/TrEMBL
CADAFUAG00001134	81.0796	0.177227	0.55152	0.321342	0.747951	0.999997	AFUA_7G01990	Afu7G01990	Putative uncharacterized protein [Source:UniProtKB/TrEMBL
CADAFUAG00001135	56.959	0.051655	0.617088	0.0837076	0.933289	0.999997	AFUA_7G00780	Afu7G00780	MFS monocarboxylate transporter; putative [Source:UniProtKB/TrEMBL
CADAFUAG00001136	46.612	0.760082	0.722431	1.05212	0.292746	0.999997	AFUA_7G02610	Afu7G02610	WD repeat protein [Source:UniProtKB/TrEMBL
CADAFUAG00001137	172.051	-0.182471	0.42157	-0.432836	0.665134	0.999997	AFUA_7G00380	Afu7G00380	GNAT family acetyltransferase; putative [Source:UniProtKB/TrEMBL
CADAFUAG00001138	32.4485	0.366673	0.785475	0.466816	0.640631	0.999997	AFUA_7G01330	Afu7G01330	Translin-associated factor TraX; putative [Source:UniProtKB/TrEMBL
CADAFUAG00001139	129.039	-0.0971186	0.462685	-0.209902	0.833744	0.999997	AFUA_7G00410	Afu7G00410	C6 transcription factor; putative [Source:UniProtKB/TrEMBL
CADAFUAG00001140	17.8287	0.310569	1.02604	0.302688	0.762128	0.999997	AFUA_7G00550	Afu7G00550	NACHT and WD40 domain protein [Source:UniProtKB/TrEMBL
CADAFUAG00001141	7883.13	-0.269586	0.3099	-0.869912	0.384349	0.999997	AFUA_7G01620	Afu7G01620	Putative uncharacterized protein [Source:UniProtKB/TrEMBL
CADAFUAG00001142	4.10831	2.23227	2.35406	0.948262	0.342996	0.999997	AFUA_7G00990	Afu7G00990	Protein alcS [Source:UniProtKB/Swiss-Prot
CADAFUAG00001143	120.997	-0.498677	0.469596	-1.06193	0.288268	0.999997	AFUA_7G01300	Afu7G01300	GPI mannosyltransferase 1 [Source:UniProtKB/Swiss-Prot
CADAFUAG00001144	81.8253	0.4734	0.554339	0.853991	0.39311	0.999997	AFUA_7G02490	Afu7G02490	Mitochondrial molecular chaperone (Atp12); putative [Source:UniProtKB/TrEMBL
CADAFUAG00001145	93.638	-0.0756438	0.515077	-0.146859	0.883243	0.999997	AFUA_7G02320	Afu7G02320	Putative uncharacterized protein [Source:UniProtKB/TrEMBL
CADAFUAG00001146	10.7598	-1.28614	1.26975	-1.01291	0.311104	0.999997	AFUA_7G01560	Afu7G01560	FAD dependent oxidoreductase; putative [Source:UniProtKB/TrEMBL
CADAFUAG00001147	83.229	-0.401154	0.534936	-0.74991	0.453309	0.999997	AFUA_7G01340	Afu7G01340	RPEL repeat protein [Source:UniProtKB/TrEMBL
CADAFUAG00001148	32.8422	0.394726	0.816659	0.483343	0.628853	0.999997	AFUA_7G01820	Afu7G01820	C6 transcription factor; putative [Source:UniProtKB/TrEMBL
CADAFUAG00001149	69.9364	0.0784639	0.569466	0.137785	0.89041	0.999997	AFUA_7G02540	Afu7G02540	Ras family GTPase (Rab4b); putative [Source:UniProtKB/TrEMBL
CADAFUAG00001150	309.483	-0.0768704	0.365712	-0.210194	0.833517	0.999997	AFUA_7G01900	Afu7G01900	TOM core complex subunit Tom6; putative [Source:UniProtKB/TrEMBL
CADAFUAG00001151	21.3964	0.664583	0.960502	0.691912	0.488993	0.999997	AFUA_7G02520	Afu7G02520	Conserved serine-rich protein [Source:UniProtKB/TrEMBL
CADAFUAG00001152	587.139	-0.186634	0.33284	-0.560732	0.57498	0.999997	AFUA_7G01870	Afu7G01870	PHD finger domain protein; putative [Source:UniProtKB/TrEMBL
CADAFUAG00001153	98.7159	0.225196	0.504416	0.446449	0.655273	0.999997	AFUA_7G02590	Afu7G02590	Putative uncharacterized protein [Source:UniProtKB/TrEMBL
CADAFUAG00001154	25.8693	-0.107366	0.867403	-0.123778	0.901491	0.999997	AFUA_7G02200	Afu7G02200	Meiotic recombination protein (Dmc1); putative [Source:UniProtKB/TrEMBL
CADAFUAG00001155	2.99678	0.477195	2.41984	0.197201	0.84367	0.999997	AFUA_7G02150	Afu7G02150	Streptococcal hemagglutinin protein; putative [Source:UniProtKB/TrEMBL
CADAFUAG00001156	297.254	-0.747135	0.366725	-2.03731	0.0416187	0.999997	AFUA_7G01280	Afu7G01280	DNA damage response protein RcaA [Source:UniProtKB/TrEMBL
CADAFUAG00001157	1124.28	0.4788	0.307739	1.55586	0.11974	0.999997	AFUA_7G01220	Afu7G01220	Farnesyl-diphosphate farnesyltransferase; putative [Source:UniProtKB/TrEMBL
CADAFUAG00001158	0.960167	-0.459253	4.26691	-0.107631	0.914288	NA	AFUA_7G01160	Afu7G01160	Cytochrome P450 alkane hydroxylase; putative [Source:UniProtKB/TrEMBL
CADAFUAG00001159	1104.24	0.242609	0.305762	0.793459	0.427511	0.999997	AFUA_7G02310	Afu7G02310	Adenine phosphoribosyltransferase 1 [Source:UniProtKB/TrEMBL
CADAFUAG00001160	0	NA	NA	NA	NA	NA	AFUA_7G01100	Afu7G01100	Putative uncharacterized protein [Source:UniProtKB/TrEMBL
CADAFUAG00001161	9.59184	-0.475301	1.36186	-0.349009	0.727082	0.999997	AFUA_7G02510	Afu7G02510	Putative uncharacterized protein [Source:UniProtKB/TrEMBL
CADAFUAG00001162	33.7268	0.805562	0.800326	1.00654	0.314155	0.999997	AFUA_7G01060	Afu7G01060	Cysteine-rich secreted protein [Source:UniProtKB/TrEMBL
CADAFUAG00001163	1083.57	-0.331194	0.345572	-0.958394	0.337864	0.999997	AFUA_7G00150	Afu7G00150	FAD-dependent monooxygenase; putative [Source:UniProtKB/TrEMBL
CADAFUAG00001164	65.543	0.658397	0.593433	1.10947	0.267227	0.999997	AFUA_7G01600	Afu7G01600	Putative uncharacterized protein [Source:UniProtKB/TrEMBL
CADAFUAG00001165	1.33416	0.24565	3.48253	0.0705379	0.943766	NA	AFUA_7G00180	Afu7G00180	NAD dependent epimerase/dehydratase; putative [Source:UniProtKB/TrEMBL
CADAFUAG00001166	25.259	-0.728704	0.865291	-0.842149	0.399705	0.999997	AFUA_7G00910	Afu7G00910	OPT peptide transporter Mtd1; putative [Source:UniProtKB/TrEMBL
CADAFUAG00001167	375.694	0.172096	0.367501	0.468288	0.639579	0.999997	AFUA_7G01230	Afu7G01230	DnaJ domain protein [Source:UniProtKB/TrEMBL
CADAFUAG00001168	8.29388	-1.99819	1.45325	-1.37498	0.169137	0.999997	AFUA_7G01770	Afu7G01770	Putative uncharacterized protein [Source:UniProtKB/TrEMBL
CADAFUAG00001169	15.5969	-1.77767	1.0756	-1.65272	0.0983869	0.999997	AFUA_7G00820	Afu7G00820	Putative uncharacterized protein [Source:UniProtKB/TrEMBL
CADAFUAG00001170	11.5479	-0.47802	1.24561	-0.383764	0.701153	0.999997	AFUA_7G01000	Afu7G01000	Aldehyde dehydrogenase; putative [Source:UniProtKB/TrEMBL
CADAFUAG00001171	109.237	0.105036	0.500305	0.209943	0.833712	0.999997	AFUA_7G01950	Afu7G01950	Putative uncharacterized protein [Source:UniProtKB/TrEMBL
CADAFUAG00001172	5.20007	0.20162	1.82055	0.110747	0.911817	0.999997	AFUA_7G01740	Afu7G01740	Sugar transporter; putative [Source:UniProtKB/TrEMBL
CADAFUAG00001173	2.75439	-1.41003	2.4396	-0.577978	0.563279	0.999997	AFUA_7G00170	Afu7G00170	Dimethylallyl tryptophan synthase GliD1 [Source:UniProtKB/TrEMBL
CADAFUAG00001174	7.15112	-0.6615	1.54299	-0.428713	0.668132	0.999997	AFUA_7G01960	Afu7G01960	Putative uncharacterized protein [Source:UniProtKB/TrEMBL
CADAFUAG00001175	37.648	0.422022	0.768589	0.549087	0.582946	0.999997	AFUA_7G00330	Afu7G00330	Esterase; putative [Source:UniProtKB/TrEMBL
CADAFUAG00001176	17.4652	0.112112	1.03122	0.108718	0.913426	0.999997	AFUA_7G01090	Afu7G01090	Proline permease PrnB [Source:UniProtKB/TrEMBL
CADAFUAG00001177	139.927	0.193722	0.453305	0.427355	0.669121	0.999997	AFUA_7G02170	Afu7G02170	Peptidyl-prolyl cis-trans isomerase-like 4 [Source:UniProtKB/Swiss-Prot
CADAFUAG00001178	205.363	1.07381	0.413732	2.59542	0.00944758	0.886027	AFUA_7G01650	Afu7G01650	Putative uncharacterized protein [Source:UniProtKB/TrEMBL
CADAFUAG00001179	0	NA	NA	NA	NA	NA	AFUA_7G01105	Afu7G01105	Putative uncharacterized protein [Source:UniProtKB/TrEMBL
CADAFUAG00001180	234.927	0.0937205	0.409919	0.228632	0.819155	0.999997	AFUA_7G00480	Afu7G00480	ABC multidrug transporter; putative [Source:UniProtKB/TrEMBL
CADAFUAG00001181	199.696	0.128623	0.40937	0.314198	0.75337	0.999997	AFUA_7G01420	Afu7G01420	Isoleucyl-tRNA synthetase; putative [Source:UniProtKB/TrEMBL
CADAFUAG00001182	9682.62	0.0132917	0.281782	0.0471701	0.962378	0.999997	AFUA_7G00370	Afu7G00370	Putative uncharacterized protein [Source:UniProtKB/TrEMBL
CADAFUAG00001183	42.8136	0.258443	0.696462	0.371081	0.710578	0.999997	AFUA_7G02090	Afu7G02090	Membrane associated DnaJ chaperone; putative [Source:UniProtKB/TrEMBL
CADAFUAG00001184	329.171	-0.707289	0.411407	-1.71919	0.085579	0.999997	AFUA_7G01270	Afu7G01270	DNA-directed polymerase kappa; putative [Source:UniProtKB/TrEMBL
CADAFUAG00001185	0.565902	1.97486	5.91222	0.33403	0.738357	NA	AFUA_7G01118	Afu7G01118	Putative uncharacterized protein [Source:UniProtKB/TrEMBL
CADAFUAG00001186	109.285	0.566736	0.499227	1.13523	0.25628	0.999997	AFUA_7G00130	Afu7G00130	C6 transcription factor; putative [Source:UniProtKB/TrEMBL
CADAFUAG00001187	79.247	-0.223627	0.566102	-0.39503	0.692821	0.999997	AFUA_7G00230	Afu7G00230	MFS multidrug transporter; putative [Source:UniProtKB/TrEMBL
CADAFUAG00001188	88.9404	-0.168071	0.600106	-0.280068	0.779425	0.999997	AFUA_7G01720	Afu7G01720	3-hydroxymethyl-3-methylglutaryl-Coenzyme A lyase [Source:UniProtKB/TrEMBL
CADAFUAG00001189	415.441	0.0381443	0.350694	0.108768	0.913387	0.999997	AFUA_7G01530	Afu7G01530	AMP-binding enzyme; putative [Source:UniProtKB/TrEMBL
CADAFUAG00001190	1727.52	0.364127	0.307007	1.18605	0.235601	0.999997	AFUA_7G02230	Afu7G02230	mRNA binding post-transcriptional regulator (Csx1); putative [Source:UniProtKB/TrEMBL
CADAFUAG00001191	2.33984	-0.0290575	2.64466	-0.0109872	0.991234	0.999997	AFUA_7G00300	Afu7G00300	Squalene-hopene-cyclase; putative [Source:UniProtKB/TrEMBL
CADAFUAG00001192	127.224	-0.599445	0.468358	-1.27989	0.200585	0.999997	AFUA_7G02040	Afu7G02040	Triacylglycerol lipase; putative [Source:UniProtKB/TrEMBL
CADAFUAG00001193	8.66239	-1.00869	1.41258	-0.714076	0.47518	0.999997	AFUA_7G00570	Afu7G00570	Conserved hypotheitcal protein [Source:UniProtKB/TrEMBL
CADAFUAG00001194	26.4862	-0.334012	0.852148	-0.391965	0.695084	0.999997	AFUA_7G01930	Afu7G01930	GTP-binding protein EsdC [Source:UniProtKB/TrEMBL
CADAFUAG00001195	8.14586	1.55835	1.5823	0.984861	0.324692	0.999997	AFUA_7G01380	Afu7G01380	Anaphase promoting complex subunit Apc11; putative [Source:UniProtKB/TrEMBL
CADAFUAG00001196	12.1192	-0.936458	1.21595	-0.770143	0.441215	0.999997	AFUA_7G00120	Afu7G00120	Metallo-beta-lactamase domain protein [Source:UniProtKB/TrEMBL
CADAFUAG00001197	1125.84	-0.229127	0.318279	-0.719893	0.471591	0.999997	AFUA_7G02460	Afu7G02460	Extracellular serine-rich protein; putative [Source:UniProtKB/TrEMBL
CADAFUAG00001198	4.46253	-0.669177	1.93818	-0.34526	0.729899	0.999997	AFUA_7G01130	Afu7G01130	Putative uncharacterized protein [Source:UniProtKB/TrEMBL
CADAFUAG00001199	525.332	-0.616642	0.362955	-1.69895	0.089329	0.999997	AFUA_7G02420	Afu7G02420	Malic enzyme [Source:UniProtKB/TrEMBL
CADAFUAG00001200	33.3692	0.0123202	0.79444	0.0155081	0.987627	0.999997	AFUA_7G00652	Afu7G00652	C6 and C2H2 transcription factor RegA-like; putative [Source:UniProtKB/TrEMBL
CADAFUAG00001201	56.523	0.471767	0.625481	0.754247	0.450701	0.999997	AFUA_7G02210	Afu7G02210	Ribosomal small subunit assembly protein; putative [Source:UniProtKB/TrEMBL
CADAFUAG00001202	18.7999	-0.530282	0.983246	-0.539318	0.589667	0.999997	AFUA_7G02030	Afu7G02030	Cytochrome c oxidase assembly protein (Pet117); putative [Source:UniProtKB/TrEMBL
CADAFUAG00001203	216.923	-0.0441828	0.444262	-0.0994521	0.920779	0.999997	AFUA_7G02380	Afu7G02380	Ferulic acid esterase (FaeA); putative [Source:UniProtKB/TrEMBL
CADAFUAG00001204	62.9871	0.349606	0.599376	0.583283	0.559703	0.999997	AFUA_7G02080	Afu7G02080	RNA polymerase I subunit Rpa43; putative [Source:UniProtKB/TrEMBL
CADAFUAG00001205	19.89	0.684258	1.01593	0.67353	0.50061	0.999997	AFUA_7G01320	Afu7G01320	Probable beta-mannosidase B [Source:UniProtKB/Swiss-Prot
CADAFUAG00001206	7.04913	1.9928	1.77494	1.12274	0.261547	0.999997	AFUA_7G00510	Afu7G00510	Putative uncharacterized protein [Source:UniProtKB/TrEMBL
CADAFUAG00001207	993.877	-0.371471	0.315664	-1.17679	0.239278	0.999997	AFUA_7G02350	Afu7G02350	C2 domain protein [Source:UniProtKB/TrEMBL
CADAFUAG00001208	15.7932	-0.712336	1.08304	-0.657719	0.510718	0.999997	AFUA_7G00220	Afu7G00220	Plasma membrane hexose transporter; putative [Source:UniProtKB/TrEMBL
CADAFUAG00001209	8263.78	-0.074796	0.299436	-0.24979	0.80275	0.999997	AFUA_7G00360	Afu7G00360	UDP-galactose 4-epimerase; putative [Source:UniProtKB/TrEMBL
CADAFUAG00001210	274.667	0.221149	0.402073	0.550022	0.582304	0.999997	AFUA_7G00680	Afu7G00680	Putative uncharacterized protein [Source:UniProtKB/TrEMBL
CADAFUAG00001211	67.5219	-0.255179	0.573801	-0.444717	0.656525	0.999997	AFUA_7G02020	Afu7G02020	Putative uncharacterized protein [Source:UniProtKB/TrEMBL
CADAFUAG00001212	160.982	1.01681	0.510987	1.98989	0.0466026	0.999997	AFUA_7G00720	Afu7G00720	Putative uncharacterized protein [Source:UniProtKB/TrEMBL
CADAFUAG00001213	540.385	0.345977	0.334207	1.03522	0.300567	0.999997	AFUA_7G02180	Afu7G02180	UDP-N-acetylglucosamine pyrophosphorylase [Source:UniProtKB/TrEMBL
CADAFUAG00001214	62.7468	0.993137	0.64231	1.5462	0.122057	0.999997	AFUA_7G00320	Afu7G00320	Extracelular proline-glycine rich protein [Source:UniProtKB/TrEMBL
CADAFUAG00001215	1.52607	0.536456	3.57586	0.150022	0.880747	0.999997	AFUA_7G00560	Afu7G00560	Putative uncharacterized protein [Source:UniProtKB/TrEMBL
CADAFUAG00001216	14.6406	-0.592983	1.12215	-0.528436	0.597197	0.999997	AFUA_7G01750	Afu7G01750	DUF218 domain protein [Source:UniProtKB/TrEMBL
CADAFUAG00001217	584.96	-0.628406	0.344679	-1.82317	0.0682782	0.999997	AFUA_7G02010	Afu7G02010	Indoleamine 2;3-dioxygenase family protein [Source:UniProtKB/TrEMBL
CADAFUAG00001218	8370.66	-0.113568	0.293181	-0.387365	0.698486	0.999997	AFUA_7G01840	Afu7G01840	Membrane bound C2 domain protein (Vp115); putative [Source:UniProtKB/TrEMBL
CADAFUAG00001219	34.7784	0.0330063	0.772201	0.0427432	0.965906	0.999997	AFUA_7G01140	Afu7G01140	Putative uncharacterized protein [Source:UniProtKB/TrEMBL
CADAFUAG00001220	2436.51	-0.119414	0.305175	-0.391298	0.695577	0.999997	AFUA_7G02390	Afu7G02390	Putative uncharacterized protein [Source:UniProtKB/TrEMBL
CADAFUAG00001221	55.1384	0.372344	0.636405	0.585073	0.558499	0.999997	AFUA_7G02290	Afu7G02290	ER glycosyl hydrolase (Edem); putative [Source:UniProtKB/TrEMBL
CADAFUAG00001222	85.2524	0.158048	0.561359	0.281546	0.778292	0.999997	AFUA_7G01850	Afu7G01850	DNA-directed RNA polymerase III subunit Rpc34; putative [Source:UniProtKB/TrEMBL
CADAFUAG00001223	5.92777	0.996323	1.82189	0.546861	0.584474	0.999997	AFUA_7G01020	Afu7G01020	Putative uncharacterized protein [Source:UniProtKB/TrEMBL
CADAFUAG00001224	0	NA	NA	NA	NA	NA	AFUA_7G02250	Afu7G02250	Putative uncharacterized protein [Source:UniProtKB/TrEMBL
CADAFUAG00001225	93.9183	0.539379	0.519787	1.03769	0.299414	0.999997	AFUA_7G02060	Afu7G02060	Putative uncharacterized protein [Source:UniProtKB/TrEMBL
CADAFUAG00001226	2816.19	-0.0489807	0.304515	-0.160848	0.872213	0.999997	AFUA_7G02110	Afu7G02110	Ran-binding protein (RanBP10); putative [Source:UniProtKB/TrEMBL
CADAFUAG00001227	2291.66	-0.152095	0.292237	-0.520449	0.60275	0.999997	AFUA_7G01700	Afu7G01700	Putative uncharacterized protein [Source:UniProtKB/TrEMBL
CADAFUAG00001228	4.81128	-0.953697	1.85364	-0.5145	0.606903	0.999997	AFUA_7G00610	Afu7G00610	Putative uncharacterized protein [Source:UniProtKB/TrEMBL
CADAFUAG00001229	570.566	0.134055	0.32907	0.407376	0.683732	0.999997	AFUA_7G02600	Afu7G02600	Putative uncharacterized protein [Source:UniProtKB/TrEMBL
CADAFUAG00001230	34.8744	0.187331	0.758359	0.247022	0.804891	0.999997	AFUA_7G02550	Afu7G02550	Probable D-xylulose reductase A [Source:UniProtKB/Swiss-Prot
CADAFUAG00001231	803.957	-0.339279	0.319166	-1.06302	0.287774	0.999997	AFUA_7G02360	Afu7G02360	Putative uncharacterized protein [Source:UniProtKB/TrEMBL
CADAFUAG00001232	116.564	-0.431631	0.481352	-0.896705	0.369876	0.999997	AFUA_7G00800	Afu7G00800	Acid phosphatase; putative [Source:UniProtKB/TrEMBL
CADAFUAG00001233	49.1898	0.660953	0.671782	0.983881	0.325174	0.999997	AFUA_7G02270	Afu7G02270	TRAPP complex component Bet3; putative [Source:UniProtKB/TrEMBL
CADAFUAG00001234	126.701	-0.216364	0.473089	-0.457344	0.647424	0.999997	AFUA_7G02120	Afu7G02120	Putative uncharacterized protein [Source:UniProtKB/TrEMBL
CADAFUAG00001235	246.39	0.0225894	0.41724	0.0541401	0.956824	0.999997	AFUA_7G00450	Afu7G00450	GPI anchored protein; putative [Source:UniProtKB/TrEMBL
CADAFUAG00001236	29.251	-0.521593	0.806904	-0.646413	0.518012	0.999997	AFUA_7G00260	Afu7G00260	Squalene-hopene-cyclase; putative [Source:UniProtKB/TrEMBL
CADAFUAG00001237	3240.73	0.0101287	0.291947	0.0346936	0.972324	0.999997	AFUA_7G01790	Afu7G01790	MFS transporter; putative [Source:UniProtKB/TrEMBL
CADAFUAG00001238	416.834	0.382881	0.348092	1.09994	0.271357	0.999997	AFUA_7G01480	Afu7G01480	Cap binding protein [Source:UniProtKB/TrEMBL
CADAFUAG00001239	40.2998	-1.16141	0.705506	-1.64621	0.0997205	0.999997	AFUA_7G00540	Afu7G00540	Integral membrane protein [Source:UniProtKB/TrEMBL
CADAFUAG00001240	6.6203	-0.509462	1.61654	-0.315156	0.752643	0.999997	AFUA_7G01980	Afu7G01980	Alcohol dehydrogenase; putative [Source:UniProtKB/TrEMBL
CADAFUAG00001241	93.2843	-0.897596	0.522964	-1.71636	0.0860956	0.999997	AFUA_7G01500	Afu7G01500	Putative uncharacterized protein [Source:UniProtKB/TrEMBL
CADAFUAG00001242	82.292	0.241613	0.542407	0.445446	0.655997	0.999997	AFUA_7G00470	Afu7G00470	Putative uncharacterized protein [Source:UniProtKB/TrEMBL
CADAFUAG00001243	35.7435	0.163937	0.754651	0.217236	0.828025	0.999997	AFUA_7G00240	Afu7G00240	Probable beta-glucosidase K [Source:UniProtKB/Swiss-Prot
CADAFUAG00001244	103.054	-0.214883	0.493538	-0.435392	0.663278	0.999997	AFUA_7G00960	Afu7G00960	Extracellular cysteine-rich protein; putative [Source:UniProtKB/TrEMBL
CADAFUAG00001245	2966.52	-0.0635016	0.31173	-0.203707	0.838582	0.999997	AFUA_7G00920	Afu7G00920	UbiD family decarboxylase; putative [Source:UniProtKB/TrEMBL
CADAFUAG00001246	840.004	-0.135022	0.334498	-0.403657	0.686465	0.999997	AFUA_7G00930	Afu7G00930	Integral membrane protein [Source:UniProtKB/TrEMBL
CADAFUAG00001247	45.2411	-0.474673	0.677771	-0.700345	0.483712	0.999997	AFUA_7G01250	Afu7G01250	Putative uncharacterized protein [Source:UniProtKB/TrEMBL
CADAFUAG00001248	50.587	-0.34986	0.65767	-0.531969	0.594748	0.999997	AFUA_7G00850	Afu7G00850	GNAT family acetyltransferase; putative [Source:UniProtKB/TrEMBL
CADAFUAG00001249	11.9476	-1.17062	1.2422	-0.942373	0.346002	0.999997	AFUA_7G00200	Afu7G00200	Putative uncharacterized protein [Source:UniProtKB/TrEMBL
CADAFUAG00001250	132.444	-0.018774	0.460651	-0.0407553	0.967491	0.999997	AFUA_7G01390	Afu7G01390	Putative uncharacterized protein [Source:UniProtKB/TrEMBL
CADAFUAG00001251	9.85999	-0.881326	1.3237	-0.665804	0.505536	0.999997	AFUA_7G01910	Afu7G01910	DUF1716 domain protein [Source:UniProtKB/TrEMBL
CADAFUAG00001252	54.9662	0.367901	0.667054	0.551531	0.58127	0.999997	AFUA_7G02480	Afu7G02480	Oxysterol binding protein (Osh1); putative [Source:UniProtKB/TrEMBL
CADAFUAG00001253	8.34325	0.34125	1.47194	0.231837	0.816665	0.999997	AFUA_7G01580	Afu7G01580	Molybdopterin synthase small subunit CnxG [Source:UniProtKB/TrEMBL
CADAFUAG00001254	51.3504	-0.0824883	0.682472	-0.120867	0.903796	0.999997	AFUA_7G01030	Afu7G01030	Calcium transporting ATPase (Pmc1); putative [Source:UniProtKB/TrEMBL
CADAFUAG00001255	0.894372	2.62777	4.52062	0.581285	0.561048	NA	AFUA_7G00630	Afu7G00630	Putative uncharacterized protein [Source:UniProtKB/TrEMBL
CADAFUAG00001256	25.6872	-0.120914	0.894393	-0.135191	0.892461	0.999997	AFUA_7G01450	Afu7G01450	Cytochrome P450 monooxygenase; putative [Source:UniProtKB/TrEMBL
CADAFUAG00001257	82.2584	0.631421	0.612703	1.03055	0.302752	0.999997	AFUA_7G00790	Afu7G00790	Putative uncharacterized protein [Source:UniProtKB/TrEMBL
CADAFUAG00001258	184.514	-0.111278	0.436162	-0.25513	0.798623	0.999997	AFUA_7G01470	Afu7G01470	Integral membrane protein; Mpv17/PMP22 family; putative [Source:UniProtKB/TrEMBL
CADAFUAG00001259	16.9305	-0.941234	1.03996	-0.905071	0.365428	0.999997	AFUA_7G01200	Afu7G01200	Aspergillopepsin; putaitve [Source:UniProtKB/TrEMBL
CADAFUAG00001260	7.07489	0.000983292	1.60118	0.000614104	0.99951	0.999997	AFUA_7G01890	Afu7G01890	C6 transcription factor; putative [Source:UniProtKB/TrEMBL
CADAFUAG00001261	10234.8	-0.254147	0.320755	-0.792342	0.428161	0.999997	AFUA_7G01290	Afu7G01290	Putative uncharacterized protein [Source:UniProtKB/TrEMBL
CADAFUAG00001262	356.669	-0.0535784	0.358132	-0.149605	0.881076	0.999997	AFUA_7G01670	Afu7G01670	MFS transporter Fmp42; putative [Source:UniProtKB/TrEMBL
CADAFUAG00001263	361.587	-0.00306658	0.377168	-0.00813054	0.993513	0.999997	AFUA_7G00400	Afu7G00400	Putative uncharacterized protein [Source:UniProtKB/TrEMBL
CADAFUAG00001264	1.57706	-4.81363	3.646	-1.32025	0.186751	0.999997	AFUA_7G00880	Afu7G00880	Putative uncharacterized protein [Source:UniProtKB/TrEMBL
CADAFUAG00001265	0.394266	-2.81358	5.94816	-0.473017	0.636201	NA	AFUA_7G01102	Afu7G01102	Putative uncharacterized protein [Source:UniProtKB/TrEMBL
CADAFUAG00001266	0	NA	NA	NA	NA	NA
CADAFUAG00001267	76137	-0.323532	0.303793	-1.06497	0.286887	0.999997	AFUA_4G03010	Afu4G03010	Putative uncharacterized protein [Source:UniProtKB/TrEMBL
CADAFUAG00001268	1523.56	-0.0948533	0.31817	-0.298122	0.76561	0.999997	AFUA_4G03090	Afu4G03090	Putative uncharacterized protein [Source:UniProtKB/TrEMBL
CADAFUAG00001269	69.9271	-0.104967	0.569	-0.184476	0.85364	0.999997	AFUA_4G04270	Afu4G04270	Thymidylate synthase [Source:UniProtKB/TrEMBL
CADAFUAG00001270	306.775	0.200021	0.367951	0.543607	0.586712	0.999997	AFUA_4G03970	Afu4G03970	GPI ethanolamine phosphate transferase 1 [Source:UniProtKB/Swiss-Prot
CADAFUAG00001271	163.029	0.0914828	0.437862	0.208931	0.834502	0.999997	AFUA_4G02790	Afu4G02790	Carbon-nitrogen family hydrolase; putative [Source:UniProtKB/TrEMBL
CADAFUAG00001272	150.784	0.479851	0.457127	1.04971	0.293851	0.999997	AFUA_4G04630	Afu4G04630	Golgi membrane protein; putative [Source:UniProtKB/TrEMBL
CADAFUAG00001273	61.638	-0.0736336	0.647203	-0.113772	0.909418	0.999997	AFUA_4G04790	Afu4G04790
CADAFUAG00001274	36.5162	0.36086	0.770123	0.468575	0.639374	0.999997	AFUA_4G04470	Afu4G04470	Putative uncharacterized protein [Source:UniProtKB/TrEMBL
CADAFUAG00001275	2695.95	-0.161166	0.294205	-0.547801	0.583828	0.999997	AFUA_4G03050	Afu4G03050	Profilin [Source:UniProtKB/TrEMBL
CADAFUAG00001276	1214.36	-0.10521	0.331927	-0.316966	0.75127	0.999997	AFUA_4G04650	Afu4G04650	Putative uncharacterized protein [Source:UniProtKB/TrEMBL
CADAFUAG00001277	29.9617	0.488858	0.839538	0.582294	0.560369	0.999997	AFUA_4G04330	Afu4G04330	THO complex subunit Tho1; putative [Source:UniProtKB/TrEMBL
CADAFUAG00001278	1.96585	-0.412469	2.86317	-0.144061	0.885453	0.999997	AFUA_4G03190	Afu4G03190	Alpha;alpha-trehalose-phosphate synthase subunit; putative [Source:UniProtKB/TrEMBL
CADAFUAG00001279	13.8422	-0.411069	1.14106	-0.360251	0.718659	0.999997	AFUA_4G03870	Afu4G03870	ELL complex subunit Eap30; putative [Source:UniProtKB/TrEMBL
CADAFUAG00001280	0.677217	-1.40004	4.95396	-0.282611	0.777475	NA	AFUA_4G03200	Afu4G03200	Putative uncharacterized protein [Source:UniProtKB/TrEMBL
CADAFUAG00001281	29.3969	-0.0986314	0.810295	-0.121723	0.903119	0.999997	AFUA_4G04680	Afu4G04680	FGGY-family carbohydrate kinase; putative [Source:UniProtKB/TrEMBL
CADAFUAG00001282	2.07717	-1.39603	2.7653	-0.504839	0.613672	0.999997	AFUA_4G02770	Afu4G02770	Arachidonate 5-lipoxygenase; putative [Source:UniProtKB/TrEMBL
CADAFUAG00001283	3797.86	-0.465516	0.325439	-1.43043	0.152595	0.999997	AFUA_4G03400	Afu4G03400	Putative uncharacterized protein [Source:UniProtKB/TrEMBL
CADAFUAG00001284	4.98291	-0.386079	1.83378	-0.210537	0.833248	0.999997	AFUA_4G04370	Afu4G04370	Putative uncharacterized protein [Source:UniProtKB/TrEMBL
CADAFUAG00001285	27.9262	-0.123498	0.833766	-0.148121	0.882248	0.999997	AFUA_4G04210	Afu4G04210	Leucine aminopeptidase 1 [Source:UniProtKB/Swiss-Prot
CADAFUAG00001286	6.23647	-0.677344	1.68902	-0.401028	0.6884	0.999997	AFUA_4G03680	Afu4G03680	Oxidoreductase; short-chain dehydrogenase/reductase family [Source:UniProtKB/TrEMBL
CADAFUAG00001287	44.82	0.110057	0.680484	0.161733	0.871516	0.999997	AFUA_4G04200	Afu4G04200	Myo-inositol-1(Or 4)-monophosphatase [Source:UniProtKB/TrEMBL
CADAFUAG00001288	4277.05	-0.230667	0.302812	-0.761751	0.446209	0.999997	AFUA_4G04670	Afu4G04670	Calcium permease family membrane transporter [Source:UniProtKB/TrEMBL
CADAFUAG00001289	36.9862	0.541392	0.748479	0.723323	0.469482	0.999997	AFUA_4G03240	Afu4G03240	Cell wall serine-threonine-rich galactomannoprotein Mp1 [Source:UniProtKB/TrEMBL
CADAFUAG00001290	15.3935	-0.164499	1.09314	-0.150484	0.880383	0.999997	AFUA_4G03790	Afu4G03790	Serine peptidase; family S28; putative [Source:UniProtKB/TrEMBL
CADAFUAG00001291	1010.77	-0.0116606	0.333867	-0.0349258	0.972139	0.999997	AFUA_4G02890	Afu4G02890	Putative uncharacterized protein [Source:UniProtKB/TrEMBL
CADAFUAG00001292	287.298	0.333191	0.374845	0.888878	0.374069	0.999997	AFUA_4G04560	Afu4G04560	GTP binding protein; putative [Source:UniProtKB/TrEMBL
CADAFUAG00001293	1.05121	-0.282201	4.12871	-0.0683509	0.945506	NA	AFUA_4G02750	Afu4G02750	MFS monocarboxylate transporter; putative [Source:UniProtKB/TrEMBL
CADAFUAG00001294	432.214	0.607042	0.354536	1.71221	0.0868574	0.999997	AFUA_4G03120	Afu4G03120	Mitochondrial cytochrome b2; putative [Source:UniProtKB/TrEMBL
CADAFUAG00001295	47.1434	0.643856	0.678314	0.949201	0.342519	0.999997	AFUA_4G03630	Afu4G03630	Sterol 24-c-methyltransferase; putative [Source:UniProtKB/TrEMBL
CADAFUAG00001296	1.35443	-1.45372	3.60856	-0.402855	0.687055	NA	AFUA_4G03280	Afu4G03280	Short-chain dehydrogenase/reductase family protein; putative [Source:UniProtKB/TrEMBL
CADAFUAG00001297	164.16	0.139584	0.428493	0.325755	0.74461	0.999997	AFUA_4G04440	Afu4G04440	Conserved leucine-rich repeat protein [Source:UniProtKB/TrEMBL
CADAFUAG00001298	2.07717	-1.39603	2.7653	-0.504839	0.613672	0.999997	AFUA_4G03550	Afu4G03550	Putative uncharacterized protein [Source:UniProtKB/TrEMBL
CADAFUAG00001299	68.3599	0.142524	0.587911	0.242425	0.808451	0.999997	AFUA_4G03500	Afu4G03500	GPI anchored protein; putative [Source:UniProtKB/TrEMBL
CADAFUAG00001300	27.0121	-0.205873	0.877576	-0.234592	0.814525	0.999997	AFUA_4G04250	Afu4G04250	MFS transporter; putative [Source:UniProtKB/TrEMBL
CADAFUAG00001301	690.923	-0.245256	0.327812	-0.748162	0.454363	0.999997	AFUA_4G04170	Afu4G04170	Putative uncharacterized protein [Source:UniProtKB/TrEMBL
CADAFUAG00001302	103.197	0.211809	0.513592	0.412407	0.680041	0.999997	AFUA_4G04730	Afu4G04730	Riboflavin-specific deaminase [Source:UniProtKB/TrEMBL
CADAFUAG00001303	2251.44	0.164245	0.310559	0.528869	0.596896	0.999997	AFUA_4G04820	Afu4G04820	C-4 methyl sterol oxidase Erg25; putative [Source:UniProtKB/TrEMBL
CADAFUAG00001304	30.9328	-0.0656588	0.8159	-0.080474	0.93586	0.999997	AFUA_4G04510	Afu4G04510	F-box domain protein [Source:UniProtKB/TrEMBL
CADAFUAG00001305	60.8665	1.24059	0.651344	1.90467	0.0568232	0.999997	AFUA_4G03650	Afu4G03650	Ribosome associated DnaJ chaperone Zuotin; putative [Source:UniProtKB/TrEMBL
CADAFUAG00001306	41.2085	-0.488008	0.732213	-0.666484	0.505102	0.999997	AFUA_4G03590	Afu4G03590	MFS transporter; putative [Source:UniProtKB/TrEMBL
CADAFUAG00001307	64.8581	-0.00786871	0.589562	-0.0133467	0.989351	0.999997	AFUA_4G03660	Afu4G03660	Acid phosphatase; putative [Source:UniProtKB/TrEMBL
CADAFUAG00001308	42146.2	-0.485735	0.314339	-1.54526	0.122283	0.999997	AFUA_4G03595	Afu4G03595	Putative uncharacterized protein [Source:UniProtKB/TrEMBL
CADAFUAG00001309	363.06	-0.201054	0.361852	-0.555625	0.578468	0.999997	AFUA_4G04130	Afu4G04130	Mitochondrial ATPase (Afg1); putative [Source:UniProtKB/TrEMBL
CADAFUAG00001310	174.494	-0.400464	0.419913	-0.953683	0.340244	0.999997	AFUA_4G03440	Afu4G03440	Putative uncharacterized protein [Source:UniProtKB/TrEMBL
CADAFUAG00001311	13224.9	-0.574706	0.325025	-1.76819	0.0770292	0.999997	AFUA_4G02840	Afu4G02840	NmrA-like family protein; putative [Source:UniProtKB/TrEMBL
CADAFUAG00001312	3.10262	4.4155	3.00502	1.46938	0.141731	0.999997
CADAFUAG00001313	4.37697	-2.36966	1.97973	-1.19696	0.231321	0.999997	AFUA_4G02680	Afu4G02680	Putative uncharacterized protein [Source:UniProtKB/TrEMBL
CADAFUAG00001314	3375.12	-0.233504	0.326421	-0.715346	0.474395	0.999997	AFUA_4G04000	Afu4G04000	LysM domain protein; putative [Source:UniProtKB/TrEMBL
CADAFUAG00001315	53.9776	0.0759525	0.642398	0.118233	0.905883	0.999997	AFUA_4G04465	Afu4G04465	Putative uncharacterized protein [Source:UniProtKB/TrEMBL
CADAFUAG00001316	18.1923	0.511864	1.03593	0.494113	0.621227	0.999997	AFUA_4G03810	Afu4G03810	Putative uncharacterized protein [Source:UniProtKB/TrEMBL
CADAFUAG00001317	1089.95	-0.343736	0.32643	-1.05302	0.292334	0.999997	AFUA_4G02710	Afu4G02710	Putative uncharacterized protein [Source:UniProtKB/TrEMBL
CADAFUAG00001318	4.02275	-0.368525	2.02756	-0.181758	0.855773	0.999997	AFUA_4G02650	Afu4G02650	MFS alpha-glucoside transporter; putative [Source:UniProtKB/TrEMBL
CADAFUAG00001319	144.884	0.172805	0.462396	0.373717	0.708615	0.999997	AFUA_4G04290	Afu4G04290	Histone deacetylase HosB [Source:UniProtKB/TrEMBL
CADAFUAG00001320	914.465	0.64533	0.36295	1.77801	0.0754016	0.999997	AFUA_4G04110	Afu4G04110	SAC3/GANP domain protein [Source:UniProtKB/TrEMBL
CADAFUAG00001321	428.024	0.0469463	0.348113	0.134859	0.892723	0.999997	AFUA_4G03430	Afu4G03430	C6 transcription factor; putative [Source:UniProtKB/TrEMBL
CADAFUAG00001322	6.88845	-1.0869	1.56403	-0.694935	0.487096	0.999997	AFUA_4G03170	Afu4G03170	Putative uncharacterized protein [Source:UniProtKB/TrEMBL
CADAFUAG00001323	1.9911	1.0074	3.03487	0.33194	0.739934	0.999997	AFUA_4G04415	Afu4G04415	IBR domain protein [Source:UniProtKB/TrEMBL
CADAFUAG00001324	5.01363	-1.30974	1.92136	-0.681678	0.495443	0.999997	AFUA_4G04030	Afu4G04030	Histidinol-phosphatase [Source:UniProtKB/TrEMBL
CADAFUAG00001325	62.2638	-0.823584	0.643947	-1.27896	0.20091	0.999997	AFUA_4G03940	Afu4G03940	Ferric-chelate reductase; putative [Source:UniProtKB/TrEMBL
CADAFUAG00001326	679.95	-0.852306	0.338403	-2.51861	0.0117818	0.935464	AFUA_4G04318	Afu4G04318	Copper resistance protein Crd2; putative [Source:UniProtKB/TrEMBL
CADAFUAG00001327	438.638	0.385286	0.343357	1.12211	0.261815	0.999997	AFUA_4G03070	Afu4G03070	DEAD/DEAH box helicase; putative [Source:UniProtKB/TrEMBL
CADAFUAG00001328	32502.9	-0.00515037	0.284428	-0.0181078	0.985553	0.999997	AFUA_4G04190	Afu4G04190	Putative uncharacterized protein [Source:UniProtKB/TrEMBL
CADAFUAG00001329	524.174	-0.644215	0.354153	-1.81903	0.068907	0.999997	AFUA_4G03800	Afu4G03800	Cytochrome P450 alkane hydroxylase; putative [Source:UniProtKB/TrEMBL
CADAFUAG00001330	275.568	-0.367361	0.375407	-0.978567	0.327794	0.999997	AFUA_4G03140	Afu4G03140	Serine protein kinase Sky1; putative [Source:UniProtKB/TrEMBL
CADAFUAG00001331	75.5648	0.463252	0.558838	0.828956	0.407129	0.999997	AFUA_4G02990	Afu4G02990	Vesicle-mediated transport protein (Imh1); putative [Source:UniProtKB/TrEMBL
CADAFUAG00001332	0.32847	1.14964	6.11021	0.18815	0.850759	NA	AFUA_4G02720	Afu4G02720	GPI anchored glycosyl hydrolase; putative [Source:UniProtKB/TrEMBL
CADAFUAG00001333	2.4912	4.09824	3.19531	1.28258	0.199639	0.999997	AFUA_4G03615	Afu4G03615	Conidiation protein Con-6; putative [Source:UniProtKB/TrEMBL
CADAFUAG00001334	505.327	0.00158698	0.340817	0.00465641	0.996285	0.999997	AFUA_4G04710	Afu4G04710	Protein tyrosine phosphatase (Pyp1); putative [Source:UniProtKB/TrEMBL
CADAFUAG00001335	2.3146	-1.04292	2.85756	-0.364967	0.715136	0.999997	AFUA_4G04080	Afu4G04080	Putative uncharacterized protein [Source:UniProtKB/TrEMBL
CADAFUAG00001336	55859.9	-0.352122	0.287836	-1.22334	0.2212	0.999997	AFUA_4G03460	Afu4G03460	HLH DNA binding domain protein; putative [Source:UniProtKB/TrEMBL
CADAFUAG00001337	1159.11	-0.158858	0.329835	-0.481627	0.630071	0.999997	AFUA_4G03990	Afu4G03990	Membrane-spanning ATPase; putative [Source:UniProtKB/TrEMBL
CADAFUAG00001338	427.884	-0.235318	0.351126	-0.67018	0.502743	0.999997	AFUA_4G04540	Afu4G04540	C4-dicarboxylate transporter/malic acid transport protein; putative [Source:UniProtKB/TrEMBL
CADAFUAG00001339	65.8511	0.530377	0.605835	0.875448	0.38133	0.999997	AFUA_4G03030	Afu4G03030	Putative uncharacterized protein [Source:UniProtKB/TrEMBL
CADAFUAG00001340	1576.93	-0.576235	0.320795	-1.79627	0.0724516	0.999997	AFUA_4G04150	Afu4G04150	Di-; tri-valent inorganic cation transporter; putative [Source:UniProtKB/TrEMBL
CADAFUAG00001341	4.41154	1.20141	2.06474	0.581872	0.560653	0.999997	AFUA_4G03670	Afu4G03670	C6 transcription factor; putative [Source:UniProtKB/TrEMBL
CADAFUAG00001342	15.4286	0.00808413	1.08644	0.00744097	0.994063	0.999997	AFUA_4G04420	Afu4G04420	Actin-like protein arp6 [Source:UniProtKB/Swiss-Prot
CADAFUAG00001343	777.71	-0.128435	0.323313	-0.397245	0.691187	0.999997	AFUA_4G03340	Afu4G03340	DUF1212 domain membrane protein [Source:UniProtKB/TrEMBL
CADAFUAG00001344	1352.25	0.19635	0.301119	0.652068	0.514357	0.999997	AFUA_4G03320	Afu4G03320	Membrane bound cation transporter; putative [Source:UniProtKB/TrEMBL
CADAFUAG00001345	34.5706	0.33006	0.793112	0.416159	0.677294	0.999997	AFUA_4G03520	Afu4G03520	Putative uncharacterized protein [Source:UniProtKB/TrEMBL
CADAFUAG00001346	519.709	0.336733	0.361733	0.930888	0.351912	0.999997	AFUA_4G03950	Afu4G03950	Cystathionine beta-lyase MetG [Source:UniProtKB/TrEMBL
CADAFUAG00001347	38.1645	-0.110953	0.749347	-0.148066	0.88229	0.999997	AFUA_4G04570	Afu4G04570	Putative uncharacterized protein [Source:UniProtKB/TrEMBL
CADAFUAG00001348	250.138	-0.473408	0.38247	-1.23777	0.215803	0.999997	AFUA_4G04750	Afu4G04750	NADH-ubiquinone oxidoreductase 21 kDa subunit; putative [Source:UniProtKB/TrEMBL
CADAFUAG00001349	90.7816	0.137594	0.525727	0.261722	0.793536	0.999997	AFUA_4G03321	Afu4G03321	UbiE/COQ5 methyltransferase; putative [Source:UniProtKB/TrEMBL
CADAFUAG00001350	0	NA	NA	NA	NA	NA	AFUA_4G02800	Afu4G02800	Haemolysin-III family protein [Source:UniProtKB/TrEMBL
CADAFUAG00001351	423.747	-0.433536	0.388849	-1.11492	0.264883	0.999997	AFUA_4G04230	Afu4G04230	Putative uncharacterized protein [Source:UniProtKB/TrEMBL
CADAFUAG00001352	24.5856	0.0829017	0.880526	0.0941502	0.92499	0.999997	AFUA_4G04745	Afu4G04745	Chromosome segregation in meiosis protein 3 [Source:UniProtKB/Swiss-Prot
CADAFUAG00001353	0.565902	1.97486	5.91222	0.33403	0.738357	NA	AFUA_4G02740	Afu4G02740	Putative uncharacterized protein [Source:UniProtKB/TrEMBL
CADAFUAG00001354	235.276	-0.108597	0.388346	-0.279641	0.779753	0.999997	AFUA_4G04100	Afu4G04100	Vacuolar protein sorting protein (Vps36); putative [Source:UniProtKB/TrEMBL
CADAFUAG00001355	17695.4	-0.476578	0.294346	-1.61911	0.105424	0.999997	AFUA_4G03830	Afu4G03830	Putative uncharacterized protein [Source:UniProtKB/TrEMBL
CADAFUAG00001356	599.428	-0.221814	0.325799	-0.680831	0.495978	0.999997	AFUA_4G02830	Afu4G02830	Aldehyde dehydrogenase; putative [Source:UniProtKB/TrEMBL
CADAFUAG00001357	143.383	0.133505	0.502079	0.265905	0.790312	0.999997	AFUA_4G04800	Afu4G04800	AAA family ATPase; putative [Source:UniProtKB/TrEMBL
CADAFUAG00001358	340.181	0.609794	0.370357	1.6465	0.0996607	0.999997	AFUA_4G04600	Afu4G04600	Cytochrome c heme lyase; putative [Source:UniProtKB/TrEMBL
CADAFUAG00001359	119.865	-0.465453	0.525465	-0.885793	0.375729	0.999997	AFUA_4G02805	Afu4G02805	Asp hemolysin-like protein [Source:UniProtKB/TrEMBL
CADAFUAG00001360	30.7656	0.441496	0.805781	0.547911	0.583753	0.999997	AFUA_4G03160	Afu4G03160	Pre-mRNA-splicing factor cwc26 [Source:UniProtKB/Swiss-Prot
CADAFUAG00001361	241.374	-0.357019	0.384701	-0.928044	0.353385	0.999997	AFUA_4G03840	Afu4G03840	DNA repair protein Rhp26/Rad26; putative [Source:UniProtKB/TrEMBL
CADAFUAG00001362	911.944	-0.766868	0.349774	-2.19247	0.0283458	0.999997	AFUA_4G02850	Afu4G02850	Putative uncharacterized protein [Source:UniProtKB/TrEMBL
CADAFUAG00001363	10026.7	-0.291646	0.309729	-0.941615	0.34639	0.999997	AFUA_4G03020	Afu4G03020	Chromatin remodeling complex subunit (Arp5); putative [Source:UniProtKB/TrEMBL
CADAFUAG00001364	11509.6	-0.404995	0.336553	-1.20336	0.228837	0.999997	AFUA_4G04640	Afu4G04640	Ubiquitin fusion degradation protein (Ufd1); putative [Source:UniProtKB/TrEMBL
CADAFUAG00001365	123.876	0.340255	0.473659	0.718355	0.472539	0.999997	AFUA_4G04060	Afu4G04060	Putative uncharacterized protein [Source:UniProtKB/TrEMBL
CADAFUAG00001366	117.606	1.14539	0.489054	2.34205	0.0191781	0.999997	AFUA_4G03290	Afu4G03290	Oxidoreductase; short-chain dehydrogenase/reductase family [Source:UniProtKB/TrEMBL
CADAFUAG00001367	420.43	0.253586	0.35541	0.713502	0.475535	0.999997	AFUA_4G03890	Afu4G03890	Putative uncharacterized protein [Source:UniProtKB/TrEMBL
CADAFUAG00001368	206.791	0.111565	0.408065	0.273399	0.784546	0.999997	AFUA_4G04620	Afu4G04620	Mitochondrial outer membrane protein (Sam50); putative [Source:UniProtKB/TrEMBL
CADAFUAG00001369	252.574	0.445705	0.385643	1.15575	0.247785	0.999997	AFUA_4G04160	Afu4G04160	Glutamyl-tRNA(Gln) amidotransferase subunit A; putative [Source:UniProtKB/TrEMBL
CADAFUAG00001370	10.7379	2.0174	1.45807	1.38361	0.166477	0.999997	AFUA_4G04040	Afu4G04040	Phosphopantetheinyl transferase PptB [Source:UniProtKB/TrEMBL
CADAFUAG00001371	15.2772	-0.335493	1.0855	-0.309068	0.75727	0.999997	AFUA_4G04390	Afu4G04390	Topoisomerase 1-associated factor 1 [Source:UniProtKB/Swiss-Prot
CADAFUAG00001372	9.76844	0.343997	1.35719	0.253463	0.79991	0.999997	AFUA_4G02950	Afu4G02950	Nucleotidase; putative [Source:UniProtKB/TrEMBL
CADAFUAG00001373	51.8861	-0.202123	0.650363	-0.310784	0.755965	0.999997	AFUA_4G03110	Afu4G03110	MFS monosaccharide transporter; putative [Source:UniProtKB/TrEMBL
CADAFUAG00001374	14494.1	0.385536	0.3015	1.27872	0.200994	0.999997	AFUA_4G03360	Afu4G03360	GPI anchored protein; putative [Source:UniProtKB/TrEMBL
CADAFUAG00001375	39.2563	-0.237543	0.750247	-0.316619	0.751533	0.999997	AFUA_4G03645	Afu4G03645	Mitochondrial zinc maintenance protein 1; mitochondrial [Source:UniProtKB/Swiss-Prot
CADAFUAG00001376	2747.56	0.157435	0.301526	0.522129	0.601581	0.999997	AFUA_4G02880	Afu4G02880	Putative uncharacterized protein [Source:UniProtKB/TrEMBL
CADAFUAG00001377	2849.8	0.161528	0.289374	0.558199	0.576708	0.999997	AFUA_4G03900	Afu4G03900	Peroxisomal multifunctional beta-oxidation protein (MFP); putative [Source:UniProtKB/TrEMBL
CADAFUAG00001378	0.394266	-2.81358	5.94816	-0.473017	0.636201	NA	AFUA_4G02700	Afu4G02700	Neutral protease 2 homolog AFUB_070680 [Source:UniProtKB/Swiss-Prot
CADAFUAG00001379	16.8088	-0.682143	1.03909	-0.656479	0.511516	0.999997	AFUA_4G03230	Afu4G03230	Extracellular guanyl-specific ribonuclease RntA [Source:UniProtKB/TrEMBL
CADAFUAG00001380	269.302	0.651198	0.386227	1.68605	0.0917863	0.999997	AFUA_4G03770	Afu4G03770	Chlorohydrolase family protein [Source:UniProtKB/TrEMBL
CADAFUAG00001381	1.63738	-0.873169	3.33286	-0.261988	0.793331	0.999997	AFUA_4G03260	Afu4G03260	Epoxide hydrolase; putative [Source:UniProtKB/TrEMBL
CADAFUAG00001382	607.171	0.182799	0.331932	0.550713	0.58183	0.999997	AFUA_4G03730	Afu4G03730	Dienelactone hydrolase [Source:UniProtKB/TrEMBL
CADAFUAG00001383	68.3708	-0.226213	0.571324	-0.395946	0.692145	0.999997	AFUA_4G03100	Afu4G03100	Ras-like GTP-binding protein; putative [Source:UniProtKB/TrEMBL
CADAFUAG00001384	291.592	-0.268799	0.370014	-0.726457	0.467558	0.999997	AFUA_4G03420	Afu4G03420	L-PSP endoribonuclease family protein; putative [Source:UniProtKB/TrEMBL
CADAFUAG00001385	2.01137	-0.368586	2.80996	-0.131171	0.89564	0.999997	AFUA_4G03210	Afu4G03210	Probable cutinase 3 [Source:UniProtKB/Swiss-Prot
CADAFUAG00001386	23.1763	-0.364454	0.90034	-0.404796	0.685627	0.999997	AFUA_4G03540	Afu4G03540	Integral membrane protein ; putative [Source:UniProtKB/TrEMBL
CADAFUAG00001387	33.8237	-0.175507	0.772959	-0.227059	0.820378	0.999997	AFUA_4G04260	Afu4G04260	Queuine tRNA-ribosyltransferase [Source:UniProtKB/TrEMBL
CADAFUAG00001388	2.79991	-1.369	2.39534	-0.571524	0.567645	0.999997	AFUA_4G02860	Afu4G02860	Glycosyl hydrolase family 88; putative [Source:UniProtKB/TrEMBL
CADAFUAG00001389	3.10313	-1.77513	2.50045	-0.709922	0.477752	0.999997
CADAFUAG00001390	1586.43	0.312406	0.303228	1.03027	0.302885	0.999997	AFUA_4G03585	Afu4G03585	Probable alpha-galactosidase D [Source:UniProtKB/Swiss-Prot
CADAFUAG00001391	20.6594	-0.187884	0.949204	-0.197939	0.843093	0.999997	AFUA_4G02980	Afu4G02980	Acetyltransferase; GNAT family; putative [Source:UniProtKB/TrEMBL
CADAFUAG00001392	273.625	0.0319649	0.380843	0.0839321	0.93311	0.999997	AFUA_4G04760	Afu4G04760	Inositol kinase kinase (UvsB); putative [Source:UniProtKB/TrEMBL
CADAFUAG00001393	44.8901	0.234499	0.696255	0.3368	0.736267	0.999997	AFUA_4G03760	Afu4G03760	Glycine dehydrogenase [Source:UniProtKB/TrEMBL
CADAFUAG00001394	67.93	0.169635	0.578818	0.293072	0.769467	0.999997	AFUA_4G03060	Afu4G03060	Putative uncharacterized protein [Source:UniProtKB/TrEMBL
CADAFUAG00001395	1193.64	0.155493	0.303661	0.512063	0.608607	0.999997	AFUA_4G03860	Afu4G03860	Eukaryotic translation initiation factor 3 subunit C [Source:UniProtKB/Swiss-Prot
CADAFUAG00001396	104.877	0.0646379	0.4963	0.130239	0.896377	0.999997	AFUA_4G03610	Afu4G03610	Phosphate:H+ symporter [Source:UniProtKB/TrEMBL
CADAFUAG00001397	93.0188	0.336741	0.548444	0.613993	0.53922	0.999997	AFUA_4G03910	Afu4G03910	RING finger protein (Zin); putative [Source:UniProtKB/TrEMBL
CADAFUAG00001398	30.028	-0.046195	0.859583	-0.0537412	0.957141	0.999997	AFUA_4G04450	Afu4G04450	Putative uncharacterized protein [Source:UniProtKB/TrEMBL
CADAFUAG00001399	31.3309	0.576404	0.841576	0.684911	0.4934	0.999997	AFUA_4G03310	Afu4G03310	C6 finger domain protein; putative [Source:UniProtKB/TrEMBL
CADAFUAG00001400	20.4236	-1.47298	1.04632	-1.40777	0.159199	0.999997	AFUA_4G03700	Afu4G03700	GMP synthase [Source:UniProtKB/TrEMBL
CADAFUAG00001401	3961.13	-0.016888	0.297822	-0.0567049	0.95478	0.999997	AFUA_4G02940	Afu4G02940
CADAFUAG00001402	21.2401	0.11785	0.941808	0.125132	0.900419	0.999997	AFUA_4G03780	Afu4G03780	Probable rhamnogalacturonate lyase A [Source:UniProtKB/Swiss-Prot
CADAFUAG00001403	29.3673	-0.434443	0.815024	-0.533044	0.594003	0.999997	AFUA_4G03930	Afu4G03930	Cysteine synthase B; putative [Source:UniProtKB/TrEMBL
CADAFUAG00001404	55.292	-0.105302	0.632004	-0.166616	0.867672	0.999997	AFUA_4G04320	Afu4G04320	Homeobox transcription factor; putative [Source:UniProtKB/TrEMBL
CADAFUAG00001405	388.316	-0.229026	0.354753	-0.645593	0.518543	0.999997	AFUA_4G03450	Afu4G03450	NmrA-like family protein [Source:UniProtKB/TrEMBL
CADAFUAG00001406	1495.96	-0.168465	0.300903	-0.559864	0.575572	0.999997	AFUA_4G04740	Afu4G04740	Ran exchange factor Prp20/Pim1; putative [Source:UniProtKB/TrEMBL
CADAFUAG00001407	59.8224	0.484383	0.629348	0.769659	0.441502	0.999997	AFUA_4G04690	Afu4G04690	Putative uncharacterized protein [Source:UniProtKB/TrEMBL
CADAFUAG00001408	1043.82	0.161025	0.316051	0.509489	0.610409	0.999997	AFUA_4G02900	Afu4G02900	Sensor histidine kinase/response regulator; putative [Source:UniProtKB/TrEMBL
CADAFUAG00001409	906.18	0.440306	0.330159	1.33361	0.18233	0.999997	AFUA_4G03490	Afu4G03490	Tripeptidyl-peptidase sed2 [Source:UniProtKB/Swiss-Prot
CADAFUAG00001410	789.527	0.358128	0.318889	1.12305	0.261416	0.999997	AFUA_4G04460	Afu4G04460	60S ribosomal protein L13 [Source:UniProtKB/TrEMBL
CADAFUAG00001411	147.728	0.32405	0.451642	0.717493	0.47307	0.999997	AFUA_4G04300	Afu4G04300	Alanine racemase family protein; putative [Source:UniProtKB/TrEMBL
CADAFUAG00001412	1164.55	0.0992375	0.305933	0.324377	0.745653	0.999997	AFUA_4G04120	Afu4G04120	Protein kinase activator Bem1; putative [Source:UniProtKB/TrEMBL
CADAFUAG00001413	9063	-0.0747209	0.296186	-0.252277	0.800827	0.999997	AFUA_4G03960	Afu4G03960	C6 transcription factor Ctf1A; putative [Source:UniProtKB/TrEMBL
CADAFUAG00001414	31.2037	1.10146	0.89724	1.22761	0.219594	0.999997	AFUA_4G03130	Afu4G03130	Phosphoric ester hydrolase; putative [Source:UniProtKB/TrEMBL
CADAFUAG00001415	191.119	-0.998407	0.463093	-2.15596	0.0310871	0.999997	AFUA_4G02820	Afu4G02820	Methylisocitrate lyase [Source:UniProtKB/TrEMBL
CADAFUAG00001416	116.985	-0.086995	0.487214	-0.178556	0.858286	0.999997	AFUA_4G04520	Afu4G04520	Succinyl-CoA synthetase beta subunit; putative [Source:UniProtKB/TrEMBL
CADAFUAG00001417	76.6487	0.819153	0.613505	1.3352	0.18181	0.999997	AFUA_4G03180	Afu4G03180	Nuclear envelope protein Brr6; putative [Source:UniProtKB/TrEMBL
CADAFUAG00001418	7.37375	-1.20863	1.53518	-0.78729	0.431112	0.999997
CADAFUAG00001419	1.66263	0.675995	3.22094	0.209875	0.833765	0.999997	AFUA_4G03080	Afu4G03080	C2H2 finger domain protein; putative [Source:UniProtKB/TrEMBL
CADAFUAG00001420	132.324	0.516308	0.475274	1.08634	0.27733	0.999997	AFUA_4G04550	Afu4G04550	Xanthine-guanine phosphoribosyl transferase Xpt1; putative [Source:UniProtKB/TrEMBL
CADAFUAG00001421	8.18205	-0.335412	1.48873	-0.225301	0.821745	0.999997	AFUA_4G02705	Afu4G02705
CADAFUAG00001422	117.606	-0.158736	0.532008	-0.29837	0.765421	0.999997	AFUA_4G04810	Afu4G04810	Rab GTPase SrgA; putative [Source:UniProtKB/TrEMBL
CADAFUAG00001423	84.5314	-0.0455601	0.530784	-0.0858355	0.931597	0.999997	AFUA_4G04090	Afu4G04090	Conserved serine-threonine rich protein [Source:UniProtKB/TrEMBL
CADAFUAG00001424	2117.96	-0.48356	0.341086	-1.4177	0.156277	0.999997	AFUA_4G03740	Afu4G03740	MFS transporter; putative [Source:UniProtKB/TrEMBL
CADAFUAG00001425	950.442	-0.347206	0.334731	-1.03727	0.299611	0.999997	AFUA_4G03620	Afu4G03620	Putative uncharacterized protein [Source:UniProtKB/TrEMBL
CADAFUAG00001426	225.055	0.334123	0.42041	0.794755	0.426756	0.999997	AFUA_4G03580	Afu4G03580	Phosphoglycerate mutase family protein [Source:UniProtKB/TrEMBL
CADAFUAG00001427	418.164	0.191774	0.351083	0.546235	0.584904	0.999997	AFUA_4G04180	Afu4G04180	Chitin synthase B [Source:UniProtKB/TrEMBL
CADAFUAG00001428	3.50237	-0.726943	2.23961	-0.324584	0.745496	0.999997	AFUA_4G02730	Afu4G02730	O-methylsterigmatocystin oxidoreductase; putative [Source:UniProtKB/TrEMBL
CADAFUAG00001429	2624.24	-0.559013	0.344628	-1.62208	0.104787	0.999997	AFUA_4G04660	Afu4G04660	Proteasome regulatory particle subunit Rpt6; putative [Source:UniProtKB/TrEMBL
CADAFUAG00001430	2023.67	-0.0306107	0.331754	-0.0922695	0.926484	0.999997	AFUA_4G04502	Afu4G04502	Flocculation suppression protein [Source:UniProtKB/TrEMBL
CADAFUAG00001431	2.93099	1.6774	2.64798	0.633465	0.52643	0.999997	AFUA_4G04020	Afu4G04020	FK506-binding protein 1B [Source:UniProtKB/Swiss-Prot
CADAFUAG00001432	3423.31	-0.115858	0.325194	-0.356275	0.721635	0.999997	AFUA_4G04280	Afu4G04280	AN1 zinc finger protein [Source:UniProtKB/TrEMBL
CADAFUAG00001433	76.5425	-0.0778546	0.56132	-0.138699	0.889688	0.999997	AFUA_4G04530	Afu4G04530	Short chain dehydrogenase/reductase (Ayr1); putative [Source:UniProtKB/TrEMBL
CADAFUAG00001434	89.7446	-0.622104	0.515119	-1.20769	0.227167	0.999997	AFUA_4G03530	Afu4G03530	Putative uncharacterized protein [Source:UniProtKB/TrEMBL
CADAFUAG00001435	830.737	0.0104953	0.315872	0.0332263	0.973494	0.999997	AFUA_4G03330	Afu4G03330	Plasma membrane stress response protein (Ist2); putative [Source:UniProtKB/TrEMBL
CADAFUAG00001436	16.6421	-0.575669	1.04615	-0.550273	0.582132	0.999997	AFUA_4G04380	Afu4G04380	Phenazine biosynthesis-like protein; putative [Source:UniProtKB/TrEMBL
CADAFUAG00001437	99.3624	-0.517569	0.534692	-0.967976	0.333056	0.999997	AFUA_4G03690	Afu4G03690	Aldehyde dehydrogenase family protein; putative [Source:UniProtKB/TrEMBL
CADAFUAG00001438	128.426	-0.0257937	0.499039	-0.0516866	0.958778	0.999997	AFUA_4G04410	Afu4G04410	3-hydroxybutyryl-CoA dehydrogenase; putative [Source:UniProtKB/TrEMBL
CADAFUAG00001439	2.53176	0.155656	2.61088	0.0596182	0.95246	0.999997	AFUA_4G04700	Afu4G04700	F-box domain protein [Source:UniProtKB/TrEMBL
CADAFUAG00001440	66.0605	-0.0812542	0.58396	-0.139143	0.889337	0.999997	AFUA_4G02970	Afu4G02970	Plasma membrane channel protein (Aqy1); putative [Source:UniProtKB/TrEMBL
CADAFUAG00001441	262.379	-0.229206	0.385897	-0.593958	0.55254	0.999997	AFUA_4G02920	Afu4G02920	Putative uncharacterized protein [Source:UniProtKB/TrEMBL
CADAFUAG00001442	520.407	-0.010631	0.354174	-0.0300164	0.976054	0.999997	AFUA_4G03350	Afu4G03350	Exo-beta-1;3-glucanase; putative [Source:UniProtKB/TrEMBL
CADAFUAG00001443	195.326	0.55205	0.411667	1.34101	0.179917	0.999997	AFUA_4G03640	Afu4G03640	Pre-mRNA-splicing factor slt11 [Source:UniProtKB/Swiss-Prot
CADAFUAG00001444	62.277	-0.180024	0.667308	-0.269777	0.787332	0.999997	AFUA_4G03710	Afu4G03710	Glutamine synthetase; putative [Source:UniProtKB/TrEMBL
CADAFUAG00001445	105.992	-0.405398	0.507247	-0.799212	0.424167	0.999997	AFUA_4G04140	Afu4G04140	Putative uncharacterized protein [Source:UniProtKB/TrEMBL
CADAFUAG00001446	553.908	0.181173	0.332859	0.544293	0.58624	0.999997	AFUA_4G04590	Afu4G04590	Ubiquinone biosynthesis protein; putative [Source:UniProtKB/TrEMBL
CADAFUAG00001447	31.4384	-0.189072	0.806677	-0.234384	0.814687	0.999997	AFUA_4G04480	Afu4G04480	Putative uncharacterized protein [Source:UniProtKB/TrEMBL
CADAFUAG00001448	0.788532	-3.81359	4.93379	-0.772954	0.43955	NA	AFUA_4G02780	Afu4G02780	Toxin biosynthesis peroxidase; putative [Source:UniProtKB/TrEMBL
CADAFUAG00001449	9.48052	-0.252497	1.37853	-0.183164	0.854669	0.999997	AFUA_4G04430	Afu4G04430	Putative uncharacterized protein [Source:UniProtKB/TrEMBL
CADAFUAG00001450	27.1343	-1.1304	0.837487	-1.34976	0.177094	0.999997	AFUA_4G04605	Afu4G04605	Putative uncharacterized protein [Source:UniProtKB/TrEMBL
CADAFUAG00001451	80.2185	-0.665984	0.536041	-1.24241	0.214084	0.999997	AFUA_4G03435	Afu4G03435	Formate/nitrite transporter family protein; putative [Source:UniProtKB/TrEMBL
CADAFUAG00001452	3157.97	-0.315495	0.317245	-0.994486	0.319986	0.999997	AFUA_4G03000	Afu4G03000	Lysophospholipase nte1 [Source:UniProtKB/Swiss-Prot
CADAFUAG00001453	15.7428	-1.00336	1.06461	-0.94246	0.345957	0.999997	AFUA_4G02870	Afu4G02870	2-ketogluconate transporter; putative [Source:UniProtKB/TrEMBL
CADAFUAG00001454	891.229	-0.109512	0.317386	-0.345045	0.730061	0.999997	AFUA_4G04612	Afu4G04612	Ubiquitin-conjugating enzyme Ubc6; putative [Source:UniProtKB/TrEMBL
CADAFUAG00001455	3.674	0.0687008	2.15045	0.0319471	0.974514	0.999997	AFUA_4G03250	Afu4G03250	Putative uncharacterized protein [Source:UniProtKB/TrEMBL
CADAFUAG00001456	508.703	-0.433646	0.339539	-1.27716	0.201546	0.999997	AFUA_4G03370	Afu4G03370	GABA permease (Uga4); putative [Source:UniProtKB/TrEMBL
CADAFUAG00001457	242.482	-0.0212393	0.3862	-0.0549956	0.956142	0.999997	AFUA_4G02810	Afu4G02810	Oxidoreductase; putative [Source:UniProtKB/TrEMBL
CADAFUAG00001458	20.2201	-0.699287	0.953271	-0.733567	0.463213	0.999997	AFUA_4G03040	Afu4G03040	Got1 family protein [Source:UniProtKB/TrEMBL
CADAFUAG00001459	258.303	-0.134234	0.401732	-0.334138	0.738275	0.999997	AFUA_4G04220	Afu4G04220	Putative uncharacterized protein [Source:UniProtKB/TrEMBL
CADAFUAG00001460	207.319	-0.536131	0.399029	-1.34359	0.179081	0.999997	AFUA_4G03322	Afu4G03322	WW domain protein [Source:UniProtKB/TrEMBL
CADAFUAG00001461	177.376	0.610663	0.424439	1.43875	0.150221	0.999997	AFUA_4G04310	Afu4G04310	AP-2 adaptor complex subunit alpha; putative [Source:UniProtKB/TrEMBL
CADAFUAG00001462	30.8769	0.355922	0.802284	0.443636	0.657306	0.999997	AFUA_4G02930	Afu4G02930	Dicer-like protein 2 Endoribonuclease dcl2 ATP-dependent helicase dcl2 [Source:UniProtKB/Swiss-Prot
CADAFUAG00001463	289.619	-0.0809113	0.3811	-0.21231	0.831866	0.999997	AFUA_4G03600	Afu4G03600	Acetyltransferase; GNAT family family [Source:UniProtKB/TrEMBL
CADAFUAG00001464	14.3022	-0.661351	1.11826	-0.591409	0.554246	0.999997	AFUA_4G04010	Afu4G04010	Triacylglycerol lipase (LipA); putative [Source:UniProtKB/TrEMBL
CADAFUAG00001465	1.51127	-2.9085	3.50833	-0.829027	0.407089	0.999997	AFUA_4G03150	Afu4G03150	MGMT family protein [Source:UniProtKB/TrEMBL
CADAFUAG00001466	179.86	0.504663	0.480243	1.05085	0.293328	0.999997	AFUA_4G04720	Afu4G04720	Nuclear pore protein (Nic96); putative [Source:UniProtKB/TrEMBL
CADAFUAG00001467	79.7136	0.315527	0.556613	0.566869	0.570803	0.999997	AFUA_4G03945	Afu4G03945	Putative uncharacterized protein [Source:UniProtKB/TrEMBL
CADAFUAG00001468	6378.12	0.838982	0.283831	2.95592	0.00311742	0.515621	AFUA_4G04070	Afu4G04070	Mucin family signaling protein Msb2; putative [Source:UniProtKB/TrEMBL
CADAFUAG00001469	174.081	-0.0557661	0.419894	-0.13281	0.894344	0.999997	AFUA_4G03980	Afu4G03980	Chromosome segregation protein (Pcs1); putative [Source:UniProtKB/TrEMBL
CADAFUAG00001470	49.6548	0.438978	0.699715	0.627368	0.530418	0.999997	AFUA_4G04360	Afu4G04360	TFIIH and nucleotide excision repair factor 3 complexes subunit (Tfb2); putative [Source:UniProtKB/TrEMBL
CADAFUAG00001471	1164.03	-0.546544	0.307914	-1.77499	0.0758999	0.999997	AFUA_4G03390	Afu4G03390	Aquaporin [Source:UniProtKB/TrEMBL
CADAFUAG00001472	6.97949	-1.05632	1.57437	-0.670947	0.502254	0.999997	AFUA_4G03560	Afu4G03560	Polyhydroxybutyrate depolymerase; putative [Source:UniProtKB/TrEMBL
CADAFUAG00001473	2020.73	-0.113341	0.294861	-0.384388	0.700691	0.999997	AFUA_4G03820	Afu4G03820	Putative uncharacterized protein [Source:UniProtKB/TrEMBL
CADAFUAG00001474	10.6792	-1.53829	1.30027	-1.18306	0.236787	0.999997	AFUA_4G03480	Afu4G03480	Putative uncharacterized protein [Source:UniProtKB/TrEMBL
CADAFUAG00001475	7.348	0.0689973	1.55831	0.0442769	0.964684	0.999997	AFUA_4G03750	Afu4G03750	Phthalate transporter; putative [Source:UniProtKB/TrEMBL
CADAFUAG00001476	2.01137	-0.368586	2.80996	-0.131171	0.89564	0.999997	AFUA_4G03270	Afu4G03270	Epoxide hydrolase; putative [Source:UniProtKB/TrEMBL
CADAFUAG00001477	339516	-0.206999	0.297385	-0.696062	0.48639	0.999997	AFUA_4G03410	Afu4G03410	Flavohemoprotein [Source:UniProtKB/TrEMBL
CADAFUAG00001478	342.996	0.598652	0.366109	1.63518	0.102012	0.999997	AFUA_4G03850	Afu4G03850	Protein kinase Yak1; putative [Source:UniProtKB/TrEMBL
CADAFUAG00001479	63.5792	-0.16498	0.609102	-0.270858	0.7865	0.999997	AFUA_4G04350	Afu4G04350	DEAD helicases superfamily protein (Aquarius); putative [Source:UniProtKB/TrEMBL
CADAFUAG00001480	4.69449	1.31089	2.02221	0.648249	0.516824	0.999997	AFUA_4G04580	Afu4G04580	Putative uncharacterized protein [Source:UniProtKB/TrEMBL
CADAFUAG00001481	21.8158	0.178262	0.968257	0.184106	0.85393	0.999997	AFUA_4G03510	Afu4G03510	Amino acid permease family protein; putative [Source:UniProtKB/TrEMBL
CADAFUAG00001482	41.5923	-0.463517	0.706382	-0.656184	0.511706	0.999997	AFUA_4G03722	Afu4G03722	Putative uncharacterized protein [Source:UniProtKB/TrEMBL
CADAFUAG00001483	2116.3	0.0562625	0.293244	0.191862	0.84785	0.999997	AFUA_4G03880	Afu4G03880	60S ribosomal protein L7 [Source:UniProtKB/TrEMBL
CADAFUAG00001484	7.51467	-0.209481	1.53092	-0.136833	0.891162	0.999997	AFUA_4G03220	Afu4G03220	Amino acid permease [Source:UniProtKB/TrEMBL
CADAFUAG00001485	19.2901	-0.349514	0.996002	-0.350917	0.725651	0.999997	AFUA_4G03920	Afu4G03920	MFS drug transporter; putative [Source:UniProtKB/TrEMBL
CADAFUAG00001486	84.3506	-0.112567	0.544086	-0.206892	0.836094	0.999997	AFUA_4G02960	Afu4G02960	UDP-sugar hydrolase; putative [Source:UniProtKB/TrEMBL
CADAFUAG00001487	20.1044	-0.94961	0.97271	-0.976252	0.32894	0.999997	AFUA_4G04355	Afu4G04355	PaaI_thioesterase family protein; putative [Source:UniProtKB/TrEMBL
CADAFUAG00001488	0.282951	1.04089	6.11615	0.170187	0.864863	NA	AFUA_4G02760	Afu4G02760	DUF829 domain protein (PaxU); putative [Source:UniProtKB/TrEMBL
CADAFUAG00001489	510.733	0.167487	0.337007	0.496985	0.6192	0.999997	AFUA_4G03470	Afu4G03470	Tannase; putative [Source:UniProtKB/TrEMBL
CADAFUAG00001490	573.447	-0.218647	0.328081	-0.666442	0.505129	0.999997	AFUA_4G03325	Afu4G03325	Putative uncharacterized protein [Source:UniProtKB/TrEMBL
CADAFUAG00001491	0.32847	1.14964	6.11021	0.18815	0.850759	NA	AFUA_6G00160	Afu6G00160	Ser/Thr protein phosphatase family protein [Source:UniProtKB/TrEMBL
CADAFUAG00001492	257.232	0.189707	0.4292	0.442002	0.658488	0.999997	AFUA_6G00510	Afu6G00510	NADP-dependent alcohol dehydrogenase [Source:UniProtKB/TrEMBL
CADAFUAG00001493	334.34	-1.02803	0.365041	-2.8162	0.00485949	0.659802	AFUA_6G00680	Afu6G00680	Putative uncharacterized protein [Source:UniProtKB/TrEMBL
CADAFUAG00001494	2.05689	-0.325668	2.82498	-0.115282	0.908222	0.999997	AFUA_6G00193	Afu6G00193	Putative uncharacterized protein [Source:UniProtKB/TrEMBL
CADAFUAG00001495	943.876	-0.799733	0.310214	-2.578	0.00993734	0.912862	AFUA_6G00690	Afu6G00690	Putative uncharacterized protein [Source:UniProtKB/TrEMBL
CADAFUAG00001496	632.975	-0.0723221	0.357277	-0.202426	0.839584	0.999997	AFUA_6G00620	Afu6G00620	Putative uncharacterized protein [Source:UniProtKB/TrEMBL
CADAFUAG00001497	2849.81	0.00664249	0.289294	0.022961	0.981681	0.999997	AFUA_6G00730	Afu6G00730	Putative uncharacterized protein [Source:UniProtKB/TrEMBL
CADAFUAG00001498	22502.7	-0.244445	0.281037	-0.869797	0.384411	0.999997	AFUA_6G00740	Afu6G00740	Putative uncharacterized protein [Source:UniProtKB/TrEMBL
CADAFUAG00001499	19.6597	-1.12318	0.960778	-1.16903	0.242392	0.999997	AFUA_6G00360	Afu6G00360	DUF453 domain protein [Source:UniProtKB/TrEMBL
CADAFUAG00001500	181.616	-2.01605	0.440097	-4.58093	4.62913e-06	0.00323932	AFUA_6G00430	Afu6G00430	IgE-binding protein [Source:UniProtKB/TrEMBL
CADAFUAG00001501	450.698	-0.668487	0.360472	-1.85448	0.0636709	0.999997	AFUA_6G00400	Afu6G00400	Putative uncharacterized protein [Source:UniProtKB/TrEMBL
CADAFUAG00001502	1672.84	-0.517745	0.306428	-1.68962	0.0911015	0.999997	AFUA_6G00640	Afu6G00640	Integral membrane protein [Source:UniProtKB/TrEMBL
CADAFUAG00001503	122.109	0.070036	0.482413	0.145179	0.88457	0.999997	AFUA_6G00540	Afu6G00540	Putative uncharacterized protein [Source:UniProtKB/TrEMBL
CADAFUAG00001504	397.947	-0.185776	0.352761	-0.526634	0.598448	0.999997	AFUA_6G00720	Afu6G00720	LysM domain protein; putative [Source:UniProtKB/TrEMBL
CADAFUAG00001505	0	NA	NA	NA	NA	NA	AFUA_6G00240	Afu6G00240	4-hydroxyphenylpyruvate dioxygenase; putative [Source:UniProtKB/TrEMBL
CADAFUAG00001506	1759.03	-0.288033	0.335939	-0.857397	0.391226	0.999997	AFUA_6G00660	Afu6G00660	FAD binding domain protein [Source:UniProtKB/TrEMBL
CADAFUAG00001507	16.2774	0.123502	1.06616	0.115838	0.907781	0.999997	AFUA_6G00490	Afu6G00490	DUF521 domain protein [Source:UniProtKB/TrEMBL
CADAFUAG00001508	29.3316	-0.432793	0.810056	-0.534275	0.593151	0.999997	AFUA_6G00130	Afu6G00130	MFS transporter; putative [Source:UniProtKB/TrEMBL
CADAFUAG00001509	26.3348	-0.526259	0.855697	-0.615007	0.53855	0.999997	AFUA_6G00440	Afu6G00440	Cation diffusion facilitator; putative [Source:UniProtKB/TrEMBL
CADAFUAG00001510	618.546	-0.681615	0.352379	-1.93433	0.053073	0.999997	AFUA_6G00370	Afu6G00370	Aminotransferase; putative [Source:UniProtKB/TrEMBL
CADAFUAG00001511	9.1625	-0.597882	1.37384	-0.43519	0.663424	0.999997	AFUA_6G00570	Afu6G00570	Putative uncharacterized protein [Source:UniProtKB/TrEMBL
CADAFUAG00001512	6.29183	-0.635201	1.66971	-0.380426	0.703629	0.999997	AFUA_6G00120	Afu6G00120	C6 transcription factor; putative [Source:UniProtKB/TrEMBL
CADAFUAG00001513	2.90575	0.42616	2.41525	0.176445	0.859944	0.999997	AFUA_6G00190	Afu6G00190	Putative uncharacterized protein [Source:UniProtKB/TrEMBL
CADAFUAG00001514	6.09992	-0.724365	1.65812	-0.436859	0.662214	0.999997	AFUA_6G00140	Afu6G00140	Putative uncharacterized protein [Source:UniProtKB/TrEMBL
CADAFUAG00001515	1.28864	0.18686	3.52071	0.0530746	0.957672	NA	AFUA_6G00480	Afu6G00480	Putative uncharacterized protein [Source:UniProtKB/TrEMBL
CADAFUAG00001516	3.1081	-0.310691	2.37599	-0.130763	0.895963	0.999997	AFUA_6G00260	Afu6G00260	Phosphatidylserine decarboxylase family protein [Source:UniProtKB/TrEMBL
CADAFUAG00001517	41.6131	-0.794489	0.694081	-1.14466	0.252349	0.999997	AFUA_6G00500	Afu6G00500	Chitosanase; putative [Source:UniProtKB/TrEMBL
CADAFUAG00001518	43.4095	-1.69514	0.690659	-2.45439	0.0141126	0.962377	AFUA_6G00412	Afu6G00412	Amino acid permease; putative [Source:UniProtKB/TrEMBL
CADAFUAG00001519	1.7487	-2.03396	3.21814	-0.632029	0.527368	0.999997	AFUA_6G00330	Afu6G00330	Putative uncharacterized protein [Source:UniProtKB/TrEMBL
CADAFUAG00001520	85.6511	-0.662222	0.525779	-1.25951	0.207847	0.999997	AFUA_6G00530	Afu6G00530	Putative uncharacterized protein [Source:UniProtKB/TrEMBL
CADAFUAG00001521	3.01706	-0.36855	2.32179	-0.158735	0.873878	0.999997
CADAFUAG00001522	89.674	-0.445441	0.557746	-0.798644	0.424497	0.999997	AFUA_6G00470	Afu6G00470	Plasma membrane zinc ion transporter; putative [Source:UniProtKB/TrEMBL
CADAFUAG00001523	5.53402	-0.996832	1.73946	-0.573071	0.566597	0.999997	AFUA_6G00560	Afu6G00560	Putative uncharacterized protein [Source:UniProtKB/TrEMBL
CADAFUAG00001524	292.188	-0.533394	0.384536	-1.38711	0.165408	0.999997	AFUA_6G00390	Afu6G00390	Aminotransferase; putative [Source:UniProtKB/TrEMBL
CADAFUAG00001525	44.8205	-0.172395	0.680775	-0.253233	0.800088	0.999997	AFUA_6G00710	Afu6G00710	MFS transporter; putative [Source:UniProtKB/TrEMBL
CADAFUAG00001526	1.7487	-2.03396	3.21814	-0.632029	0.527368	0.999997	AFUA_6G00320	Afu6G00320	Integral membrane protein [Source:UniProtKB/TrEMBL
CADAFUAG00001527	5.71113	-1.72046	1.72438	-0.997729	0.318411	0.999997	AFUA_6G00200	Afu6G00200	C6 transcription factor; putative [Source:UniProtKB/TrEMBL
CADAFUAG00001528	19.4875	-0.686065	0.978375	-0.701229	0.48316	0.999997	AFUA_6G00450	Afu6G00450	Probable feruloyl esterase B-1 [Source:UniProtKB/Swiss-Prot
CADAFUAG00001529	3.06258	-0.339732	2.32823	-0.145919	0.883986	0.999997	AFUA_6G00580	Afu6G00580	Ankyrin repeat protein [Source:UniProtKB/TrEMBL
CADAFUAG00001530	276.088	-0.844293	0.429515	-1.96569	0.0493346	0.999997	AFUA_6G00180	Afu6G00180	Putative uncharacterized protein [Source:UniProtKB/TrEMBL
CADAFUAG00001531	4.08854	-0.895407	2.0019	-0.447277	0.654675	0.999997	AFUA_6G00460	Afu6G00460	Putative uncharacterized protein [Source:UniProtKB/TrEMBL
CADAFUAG00001532	22.8138	-1.51015	0.900573	-1.67688	0.0935668	0.999997	AFUA_6G00555	Afu6G00555	Putative uncharacterized protein [Source:UniProtKB/TrEMBL
CADAFUAG00001533	996.784	-0.466855	0.319841	-1.45965	0.144386	0.999997	AFUA_6G00760	Afu6G00760	Glutathione S-transferase; putative [Source:UniProtKB/TrEMBL
CADAFUAG00001534	178.604	-0.50458	0.415205	-1.21526	0.224269	0.999997	AFUA_6G00550	Afu6G00550	Glycosyl transferase family 8 family; putative [Source:UniProtKB/TrEMBL
CADAFUAG00001535	106.491	-0.234855	0.493047	-0.476334	0.633837	0.999997	AFUA_6G00770	Afu6G00770	Probable arabinan endo-1;5-alpha-L-arabinosidase C [Source:UniProtKB/Swiss-Prot
CADAFUAG00001536	74.2334	-0.146442	0.574228	-0.255025	0.798704	0.999997	AFUA_6G00230	Afu6G00230	NmrA-like family protein [Source:UniProtKB/TrEMBL
CADAFUAG00001537	194.524	-0.993319	0.415236	-2.39218	0.0167488	0.998945	AFUA_6G00650	Afu6G00650	Putative uncharacterized protein [Source:UniProtKB/TrEMBL
CADAFUAG00001538	31.7932	-0.545939	0.781972	-0.698157	0.485079	0.999997	AFUA_6G00600	Afu6G00600	Putative uncharacterized protein [Source:UniProtKB/TrEMBL
CADAFUAG00001539	4.74548	-0.510955	1.87594	-0.272372	0.785336	0.999997	AFUA_6G00350	Afu6G00350	Putative uncharacterized protein [Source:UniProtKB/TrEMBL
CADAFUAG00001540	158.794	-0.0117202	0.431871	-0.0271381	0.97835	0.999997	AFUA_6G00290	Afu6G00290	Aminotransferase; putative [Source:UniProtKB/TrEMBL
CADAFUAG00001541	0	NA	NA	NA	NA	NA	AFUA_6G00150	Afu6G00150
CADAFUAG00001542	276.018	-0.414931	0.373248	-1.11168	0.266278	0.999997	AFUA_6G00630	Afu6G00630	MFS transporter; putative [Source:UniProtKB/TrEMBL
CADAFUAG00001543	26.7352	-0.92942	0.873481	-1.06404	0.28731	0.999997	AFUA_6G00310	Afu6G00310	Serine carboxypeptidase (CpdS); putative [Source:UniProtKB/TrEMBL
CADAFUAG00001544	0.394266	-2.81358	5.94816	-0.473017	0.636201	NA	AFUA_6G00250	Afu6G00250	GPI anchored protein; putative [Source:UniProtKB/TrEMBL
CADAFUAG00001545	0	NA	NA	NA	NA	NA	AFUA_6G00210	Afu6G00210	Monocarboxylate transporter; putative [Source:UniProtKB/TrEMBL
CADAFUAG00001546	1696.92	-0.0279305	0.358905	-0.0778213	0.93797	0.999997	AFUA_6G00280	Afu6G00280	NmrA-like family protein [Source:UniProtKB/TrEMBL
CADAFUAG00001547	0.394266	-2.81358	5.94816	-0.473017	0.636201	NA
CADAFUAG00001548	1336.87	0.132763	0.301255	0.440701	0.65943	0.999997	AFUA_6G00300	Afu6G00300	Serine palmitoyltransferase 1; putative [Source:UniProtKB/TrEMBL
CADAFUAG00001549	4.50309	-1.64623	1.97846	-0.83208	0.405364	0.999997	AFUA_6G00610	Afu6G00610	Putative uncharacterized protein [Source:UniProtKB/TrEMBL
CADAFUAG00001550	0	NA	NA	NA	NA	NA	AFUA_6G00270	Afu6G00270	Putative uncharacterized protein [Source:UniProtKB/TrEMBL
CADAFUAG00001551	26.734	-0.40378	0.840724	-0.480276	0.631031	0.999997	AFUA_6G00110	Afu6G00110	Dihydrodipicolinate synthetase family protein [Source:UniProtKB/TrEMBL
CADAFUAG00001552	0.65694	2.16827	5.5718	0.389151	0.697164	NA	AFUA_6G00590	Afu6G00590	Secreted peptide; putative [Source:UniProtKB/TrEMBL
CADAFUAG00001553	3772.77	0.152476	0.288232	0.529004	0.596802	0.999997	AFUA_6G00520	Afu6G00520	Putative uncharacterized protein [Source:UniProtKB/TrEMBL
CADAFUAG00001554	16.9289	0.721108	1.068	0.675197	0.49955	0.999997	AFUA_6G00220	Afu6G00220	Fungal specific transcription factor; putative [Source:UniProtKB/TrEMBL
CADAFUAG00001555	0	NA	NA	NA	NA	NA	AFUA_6G00196	Afu6G00196	Putative uncharacterized protein [Source:UniProtKB/TrEMBL
CADAFUAG00001556	10784.8	-0.203594	0.281817	-0.722434	0.470028	0.999997	AFUA_6G00750	Afu6G00750	Pyruvate decarboxylase; putative [Source:UniProtKB/TrEMBL
CADAFUAG00001557	7.04528	-1.35249	1.56123	-0.866301	0.386325	0.999997	AFUA_6G00340	Afu6G00340	Putative uncharacterized protein [Source:UniProtKB/TrEMBL
CADAFUAG00001558	64.7998	-0.816526	0.583359	-1.3997	0.161603	0.999997	AFUA_6G00670	Afu6G00670	Extracellular serine-rich protein [Source:UniProtKB/TrEMBL
CADAFUAG00001559	24.4852	-0.430981	0.874007	-0.493109	0.621935	0.999997	AFUA_6G06560	Afu6G06560	Putative uncharacterized protein [Source:UniProtKB/TrEMBL
CADAFUAG00001560	1120.4	-0.214182	0.334008	-0.64125	0.52136	0.999997	AFUA_6G13770	Afu6G13770	C6 finger domain protein; putative [Source:UniProtKB/TrEMBL
CADAFUAG00001561	17.7925	1.21774	1.08497	1.12237	0.261705	0.999997	AFUA_6G09820	Afu6G09820	Protein bfr2 [Source:UniProtKB/Swiss-Prot
CADAFUAG00001562	124.888	-0.0264081	0.501186	-0.0526913	0.957978	0.999997	AFUA_6G06510	Afu6G06510	Extracellular triacylglycerol lipase; putative [Source:UniProtKB/TrEMBL
CADAFUAG00001563	355.075	-0.334183	0.394405	-0.84731	0.396822	0.999997	AFUA_6G10580	Afu6G10580	GPI anchored CFEM domain protein [Source:UniProtKB/TrEMBL
CADAFUAG00001564	11.5884	-0.862655	1.22573	-0.70379	0.481564	0.999997	AFUA_6G12940	Afu6G12940	Metallo-beta-lactamase domain protein; putative [Source:UniProtKB/TrEMBL
CADAFUAG00001565	200.972	0.345164	0.408137	0.845707	0.397716	0.999997	AFUA_6G12610	Afu6G12610	Rhomboid family protein; putative [Source:UniProtKB/TrEMBL
CADAFUAG00001566	5.75117	-0.48617	1.7133	-0.283763	0.776592	0.999997	AFUA_6G11920	Afu6G11920	MFS alpha-glucoside transporter; putative [Source:UniProtKB/TrEMBL
CADAFUAG00001567	1290.78	0.359517	0.308973	1.16359	0.244592	0.999997	AFUA_6G14442	Afu6G14442	MFS monosaccharide transporter; putative [Source:UniProtKB/TrEMBL
CADAFUAG00001568	10.087	-0.580487	1.45696	-0.398424	0.690318	0.999997	AFUA_6G11330	Afu6G11330	Histidine acid phosphatase; putative [Source:UniProtKB/TrEMBL
CADAFUAG00001569	3.92623	2.16949	2.40583	0.90176	0.367184	0.999997	AFUA_6G11580	Afu6G11580	Carboxy-cis;cis-muconate cyclase; putative [Source:UniProtKB/TrEMBL
CADAFUAG00001570	40.4379	0.0176542	0.792609	0.0222735	0.98223	0.999997	AFUA_6G08790	Afu6G08790	C6 transcription factor (PrnA); putative [Source:UniProtKB/TrEMBL
CADAFUAG00001571	11.9103	1.34086	1.36936	0.979184	0.327489	0.999997	AFUA_6G07220	Afu6G07220	Sreptomyces cyclase/dehydrase family protein [Source:UniProtKB/TrEMBL
CADAFUAG00001572	514.218	-0.449431	0.354751	-1.26689	0.205194	0.999997	AFUA_6G07120	Afu6G07120	Nuclear movement protein NudC [Source:UniProtKB/TrEMBL
CADAFUAG00001573	37.4358	0.487049	0.755392	0.644763	0.519081	0.999997	AFUA_6G11930	Afu6G11930	Putative uncharacterized protein [Source:UniProtKB/TrEMBL
CADAFUAG00001574	15.0288	0.695248	1.12664	0.617096	0.537171	0.999997	AFUA_6G08710	Afu6G08710	Alkaline phosphatase; putative [Source:UniProtKB/TrEMBL
CADAFUAG00001575	296.544	-1.08572	0.402612	-2.69668	0.0070034	0.769868	AFUA_6G13945	Afu6G13945	Cytochrome P450 monooxygenase; putative [Source:UniProtKB/TrEMBL
CADAFUAG00001576	8.28789	0.318409	1.48722	0.214097	0.830472	0.999997	AFUA_6G09770	Afu6G09770	Geranylgeranyl diphosphate synthase; putative [Source:UniProtKB/TrEMBL
CADAFUAG00001577	229.515	-0.428315	0.409975	-1.04474	0.296145	0.999997	AFUA_6G10740	Afu6G10740	Putative uncharacterized protein [Source:UniProtKB/TrEMBL
CADAFUAG00001578	73.5143	-1.11885	0.559507	-1.99971	0.0455313	0.999997	AFUA_6G09370	Afu6G09370	RING finger protein [Source:UniProtKB/TrEMBL
CADAFUAG00001579	282.109	0.22835	0.375681	0.607828	0.543301	0.999997	AFUA_6G13280	Afu6G13280	Lipid transfer protein; putative [Source:UniProtKB/TrEMBL
CADAFUAG00001580	334.134	-0.314993	0.358605	-0.878385	0.379735	0.999997	AFUA_6G07540	Afu6G07540	T-complex protein 1; epsilon subunit; putative [Source:UniProtKB/TrEMBL
CADAFUAG00001581	962.723	0.058593	0.311163	0.188303	0.850639	0.999997	AFUA_6G09340	Afu6G09340	Putative uncharacterized protein [Source:UniProtKB/TrEMBL
CADAFUAG00001582	6938.59	0.231578	0.296641	0.780666	0.434999	0.999997	AFUA_6G08820	Afu6G08820	CCR4-NOT core complex subunit Not4; putative [Source:UniProtKB/TrEMBL
CADAFUAG00001583	2153.58	0.13607	0.303984	0.447624	0.654424	0.999997	AFUA_6G06870	Afu6G06870	Casein kinase I homolog; putative [Source:UniProtKB/TrEMBL
CADAFUAG00001584	31.7065	-0.324015	0.79374	-0.408213	0.683118	0.999997	AFUA_6G09660	Afu6G09660	Nonribosomal peptide synthetase 10 [Source:UniProtKB/Swiss-Prot
CADAFUAG00001585	1189.64	-0.206529	0.304857	-0.677462	0.498113	0.999997	AFUA_6G07530	Afu6G07530	BZIP transcription factor; putative [Source:UniProtKB/TrEMBL
CADAFUAG00001586	30.4272	0.0654005	0.825736	0.0792026	0.936871	0.999997	AFUA_6G10690	Afu6G10690	Pre-mRNA polyadenylation factor fip1 [Source:UniProtKB/Swiss-Prot
CADAFUAG00001587	1308.54	-0.247327	0.312937	-0.79034	0.429329	0.999997	AFUA_6G09390	Afu6G09390	Putative uncharacterized protein [Source:UniProtKB/TrEMBL
CADAFUAG00001588	17.8649	-0.401415	1.01435	-0.395735	0.692301	0.999997	AFUA_6G08590	Afu6G08590	Protein kinase; putative [Source:UniProtKB/TrEMBL
CADAFUAG00001589	4.57334	2.39651	2.36869	1.01174	0.311661	0.999997	AFUA_6G09970	Afu6G09970	Oxidoreductase; short chain dehydrogenase/reductase family [Source:UniProtKB/TrEMBL
CADAFUAG00001590	1079.84	-0.82467	0.370926	-2.22327	0.0261973	0.999997	AFUA_6G13390	Afu6G13390	FAD dependent oxidoreductase; putative [Source:UniProtKB/TrEMBL
CADAFUAG00001591	1.00569	-0.368647	3.89257	-0.0947054	0.924549	NA	AFUA_6G11690	Afu6G11690
CADAFUAG00001592	42.4604	-0.123516	0.695459	-0.177604	0.859034	0.999997	AFUA_6G07370	Afu6G07370	Putative uncharacterized protein [Source:UniProtKB/TrEMBL
CADAFUAG00001593	47.6698	0.18335	0.673306	0.272313	0.785381	0.999997	AFUA_6G12710	Afu6G12710	Ubiquitin C-terminal hydrolase Ubp8; putative [Source:UniProtKB/TrEMBL
CADAFUAG00001594	15.8283	-0.554908	1.06304	-0.522001	0.60167	0.999997	AFUA_6G11340	Afu6G11340	Peroxisomal AMP binding enzyme; putative [Source:UniProtKB/TrEMBL
CADAFUAG00001595	23.4274	0.570816	0.946831	0.60287	0.546595	0.999997	AFUA_6G13100	Afu6G13100	Magnesium dependent phosphatase; putative [Source:UniProtKB/TrEMBL
CADAFUAG00001596	169.512	-0.24779	0.471559	-0.52547	0.599256	0.999997	AFUA_6G11530	Afu6G11530	DUF636 domain protein [Source:UniProtKB/TrEMBL
CADAFUAG00001597	33.7827	0.361891	0.771672	0.46897	0.639091	0.999997	AFUA_6G13470	Afu6G13470	Putative uncharacterized protein [Source:UniProtKB/TrEMBL
CADAFUAG00001598	23.1752	0.300416	0.92232	0.325717	0.744638	0.999997	AFUA_6G11470	Afu6G11470	Serine/threonine-protein phosphatase [Source:UniProtKB/TrEMBL
CADAFUAG00001599	8.5456	0.0675101	1.43314	0.0471065	0.962428	0.999997	AFUA_6G11980	Afu6G11980	Exo-beta-1;3-glucanase; putative [Source:UniProtKB/TrEMBL
CADAFUAG00001600	495.733	0.700018	0.35247	1.98604	0.0470292	0.999997	AFUA_6G12360	Afu6G12360	Class I alpha-mannosidase 1A [Source:UniProtKB/TrEMBL
CADAFUAG00001601	13.3974	-0.656252	1.15731	-0.56705	0.57068	0.999997	AFUA_6G10930	Afu6G10930	Extracellular protein; putative [Source:UniProtKB/TrEMBL
CADAFUAG00001602	8.5966	-0.766439	1.42418	-0.53816	0.590467	0.999997	AFUA_6G10810	Afu6G10810	Homogentisate 1;2-dioxygenase; putative [Source:UniProtKB/TrEMBL
CADAFUAG00001603	65.8928	0.188797	0.5917	0.319075	0.74967	0.999997	AFUA_6G09060	Afu6G09060	60S ribosomal protein L6; putative [Source:UniProtKB/TrEMBL
CADAFUAG00001604	648.38	0.174673	0.34786	0.502136	0.615572	0.999997	AFUA_6G07390	Afu6G07390	Isocitrate dehydrogenase LysB [Source:UniProtKB/TrEMBL
CADAFUAG00001605	3547.97	0.0790316	0.296069	0.266936	0.789518	0.999997	AFUA_6G06810	Afu6G06810	Putative uncharacterized protein [Source:UniProtKB/TrEMBL
CADAFUAG00001606	33.3648	-0.497612	0.764292	-0.651075	0.514998	0.999997	AFUA_6G09870	Afu6G09870	C6 transcription factor; putative [Source:UniProtKB/TrEMBL
CADAFUAG00001607	5.04871	-0.812449	1.82298	-0.445671	0.655835	0.999997	AFUA_6G08490	Afu6G08490	Inorganic diphosphatase; putative [Source:UniProtKB/TrEMBL
CADAFUAG00001608	42480.7	0.349904	0.281913	1.24118	0.21454	0.999997	AFUA_6G12930	Afu6G12930	Mitochondrial aconitate hydratase; putative [Source:UniProtKB/TrEMBL
CADAFUAG00001609	0	NA	NA	NA	NA	NA	AFUA_6G12140	Afu6G12140	Putative uncharacterized protein [Source:UniProtKB/TrEMBL
CADAFUAG00001610	6.11968	1.05829	1.75698	0.602334	0.546952	0.999997	AFUA_6G09260	Afu6G09260	Sensor histidine kinase/response regulator; putative [Source:UniProtKB/TrEMBL
CADAFUAG00001611	136.577	0.905959	0.467	1.93995	0.0523852	0.999997	AFUA_6G08870	Afu6G08870	Nicotinamide mononucleotide adenylyl transferase [Source:UniProtKB/TrEMBL
CADAFUAG00001612	23.2212	-0.248701	0.928939	-0.267726	0.78891	0.999997	AFUA_6G08400	Afu6G08400	Putative uncharacterized protein [Source:UniProtKB/TrEMBL
CADAFUAG00001613	43.193	0.0894831	0.693903	0.128956	0.897392	0.999997	AFUA_6G13900	Afu6G13900	Putative uncharacterized protein [Source:UniProtKB/TrEMBL
CADAFUAG00001614	13.9485	-0.885523	1.12643	-0.786132	0.43179	0.999997	AFUA_6G10130	Afu6G10130	N;O-diacetyl muramidase; putative [Source:UniProtKB/TrEMBL
CADAFUAG00001615	21.5072	1.33617	1.00593	1.3283	0.18408	0.999997	AFUA_6G09790	Afu6G09790	LysM domain protein; putative [Source:UniProtKB/TrEMBL
CADAFUAG00001616	27.9914	0.251958	0.835346	0.301621	0.762941	0.999997	AFUA_6G12090	Afu6G12090	HET domain protein [Source:UniProtKB/TrEMBL
CADAFUAG00001617	2237.18	0.266617	0.292441	0.911695	0.36193	0.999997	AFUA_6G06900	Afu6G06900	Rho GTPase Rho1 [Source:UniProtKB/TrEMBL
CADAFUAG00001618	0	NA	NA	NA	NA	NA	AFUA_6G11630	Afu6G11630	FAD-dependent isoamyl alcohol oxidase; putative [Source:UniProtKB/TrEMBL
CADAFUAG00001619	88.8739	0.739048	0.539637	1.36953	0.170834	0.999997	AFUA_6G13850	Afu6G13850	GTPase activating protein (Evi5); putative [Source:UniProtKB/TrEMBL
CADAFUAG00001620	1097.54	0.538209	0.306611	1.75535	0.0792	0.999997	AFUA_6G07820	Afu6G07820	Integral membrane protein; putative [Source:UniProtKB/TrEMBL
CADAFUAG00001621	8.10581	0.280358	1.47981	0.189455	0.849736	0.999997	AFUA_6G08080	Afu6G08080	Glycosyl hydrolase; putative [Source:UniProtKB/TrEMBL
CADAFUAG00001622	9.34842	2.43932	1.62147	1.50439	0.132481	0.999997	AFUA_6G13020	Afu6G13020	AP-3 adaptor complex subunit sigma; putative [Source:UniProtKB/TrEMBL
CADAFUAG00001623	4779.23	0.0368522	0.292144	0.126144	0.899618	0.999997	AFUA_6G06860	Afu6G06860	Regulator of G protein signaling domain protein [Source:UniProtKB/TrEMBL
CADAFUAG00001624	91.6287	-0.492036	0.515695	-0.954122	0.340022	0.999997	AFUA_6G10220	Afu6G10220	Small oligopeptide transporter; OPT family [Source:UniProtKB/TrEMBL
CADAFUAG00001625	0.394266	-2.81358	5.94816	-0.473017	0.636201	NA	AFUA_6G10200	Afu6G10200	Putative uncharacterized protein [Source:UniProtKB/TrEMBL
CADAFUAG00001626	275.712	0.104689	0.376456	0.278091	0.780943	0.999997	AFUA_6G11160	Afu6G11160	Isopentenyl-diphosphate delta-isomerase [Source:UniProtKB/TrEMBL
CADAFUAG00001627	1101.3	-0.105859	0.333573	-0.317349	0.750979	0.999997	AFUA_6G12230	Afu6G12230	Putative uncharacterized protein [Source:UniProtKB/TrEMBL
CADAFUAG00001628	1618.24	0.000125702	0.300503	0.000418306	0.999666	0.999997	AFUA_6G13140	Afu6G13140	3;4-dihydroxy-2-butanone 4-phosphate synthase [Source:UniProtKB/TrEMBL
CADAFUAG00001629	14.6154	-0.119575	1.18286	-0.10109	0.919479	0.999997	AFUA_6G07650	Afu6G07650	Putative uncharacterized protein [Source:UniProtKB/TrEMBL
CADAFUAG00001630	318.327	0.364452	0.40867	0.8918	0.3725	0.999997	AFUA_6G14280	Afu6G14280	Flavin-binding monooxygenase-like protein [Source:UniProtKB/TrEMBL
CADAFUAG00001631	251.22	0.257201	0.389156	0.660919	0.508664	0.999997	AFUA_6G09950	Afu6G09950	Putative uncharacterized protein [Source:UniProtKB/TrEMBL
CADAFUAG00001632	56.5686	0.473149	0.624918	0.757138	0.448967	0.999997	AFUA_6G10980	Afu6G10980	UV-damaged DNA binding protein; putative [Source:UniProtKB/TrEMBL
CADAFUAG00001633	59.3777	0.421821	0.64598	0.652993	0.513761	0.999997	AFUA_6G06880	Afu6G06880	Histone chaperone rtt106 [Source:UniProtKB/Swiss-Prot
CADAFUAG00001634	186.665	-0.0970997	0.4125	-0.235393	0.813904	0.999997	AFUA_6G09630	Afu6G09630	C6 finger domain protein GliZ [Source:UniProtKB/TrEMBL
CADAFUAG00001635	893.332	-0.353169	0.31766	-1.11179	0.26623	0.999997	AFUA_6G12350	Afu6G12350	Autophagy-related protein 9 [Source:UniProtKB/Swiss-Prot
CADAFUAG00001636	32.5899	0.208878	0.797879	0.261791	0.793482	0.999997	AFUA_6G06328	Afu6G06328	Putative uncharacterized protein [Source:UniProtKB/TrEMBL
CADAFUAG00001637	5.83177	-0.0246037	1.72981	-0.0142233	0.988652	0.999997	AFUA_6G06700	Afu6G06700	Putative uncharacterized protein [Source:UniProtKB/TrEMBL
CADAFUAG00001638	14.2809	0.600799	1.16502	0.515697	0.606066	0.999997	AFUA_6G13010	Afu6G13010	GTP binding protein (EngB); putative [Source:UniProtKB/TrEMBL
CADAFUAG00001639	35.8351	-0.186489	0.752768	-0.247737	0.804338	0.999997	AFUA_6G07810	Afu6G07810	Chromatin remodeling complex subunit (Rsc9); putative [Source:UniProtKB/TrEMBL
CADAFUAG00001640	97.5735	0.12118	0.515709	0.234977	0.814226	0.999997	AFUA_6G09190	Afu6G09190	Metallopeptidase family M24; putative [Source:UniProtKB/TrEMBL
CADAFUAG00001641	3163.2	-0.540707	0.341411	-1.58374	0.113253	0.999997	AFUA_6G07880	Afu6G07880	DUF500 and SH3 domain protein [Source:UniProtKB/TrEMBL
CADAFUAG00001642	183.575	0.131397	0.424618	0.309448	0.756981	0.999997	AFUA_6G11570	Afu6G11570	Alpha/beta hydrolase; putative [Source:UniProtKB/TrEMBL
CADAFUAG00001643	471.506	0.181021	0.338714	0.534436	0.59304	0.999997	AFUA_6G12310	Afu6G12310	Putative uncharacterized protein [Source:UniProtKB/TrEMBL
CADAFUAG00001644	15.5904	0.19424	1.10545	0.175712	0.860521	0.999997	AFUA_6G13740	Afu6G13740	Putative uncharacterized protein [Source:UniProtKB/TrEMBL
CADAFUAG00001645	27.4354	0.213365	0.856419	0.249136	0.803255	0.999997	AFUA_6G11040	Afu6G11040	FAD synthetase; putative [Source:UniProtKB/TrEMBL
CADAFUAG00001646	101.194	-0.0627419	0.503805	-0.124536	0.900891	0.999997	AFUA_6G12420	Afu6G12420	SprT family metallopeptidase; putative [Source:UniProtKB/TrEMBL
CADAFUAG00001647	255.195	-0.546139	0.397209	-1.37494	0.169149	0.999997	AFUA_6G14360	Afu6G14360	Cytochrome P450 monooxygenase; putative [Source:UniProtKB/TrEMBL
CADAFUAG00001648	201.806	-0.546778	0.404345	-1.35226	0.176294	0.999997	AFUA_6G11190	Afu6G11190	Protein kinase (VPS15); putative [Source:UniProtKB/TrEMBL
CADAFUAG00001649	276.919	-0.100006	0.377971	-0.264588	0.791327	0.999997	AFUA_6G08310	Afu6G08310	Proteasome subunit beta type [Source:UniProtKB/TrEMBL
CADAFUAG00001650	101.037	-0.040944	0.502616	-0.0814618	0.935075	0.999997	AFUA_6G11660	Afu6G11660	Amidohydrolase; putative [Source:UniProtKB/TrEMBL
CADAFUAG00001651	2190.95	-0.240123	0.339565	-0.707149	0.479474	0.999997	AFUA_6G09450	Afu6G09450	LipA and NB-ARC domain protein [Source:UniProtKB/TrEMBL
CADAFUAG00001652	48.7187	-0.777051	0.650311	-1.19489	0.23213	0.999997	AFUA_6G14010	Afu6G14010	GPI anchored protein; putative [Source:UniProtKB/TrEMBL
CADAFUAG00001653	7.02886	3.07423	2.03875	1.5079	0.13158	0.999997	AFUA_6G09540	Afu6G09540	Endoglucanase; putative [Source:UniProtKB/TrEMBL
CADAFUAG00001654	0.677217	-1.40004	4.95396	-0.282611	0.777475	NA	AFUA_6G09785	Afu6G09785	Putative uncharacterized protein [Source:UniProtKB/TrEMBL
CADAFUAG00001655	1.7487	-2.03396	3.21814	-0.632029	0.527368	0.999997	AFUA_6G09560	Afu6G09560	Putative uncharacterized protein [Source:UniProtKB/TrEMBL
CADAFUAG00001656	20.8852	0.777668	1.03802	0.749187	0.453744	0.999997	AFUA_6G11100	Afu6G11100	Amino acid permease; putative [Source:UniProtKB/TrEMBL
CADAFUAG00001657	47.7465	-0.188651	0.666432	-0.283076	0.777119	0.999997	AFUA_6G06610	Afu6G06610	Endoplasmic reticulum DnaJ domain protein Erj5; putative [Source:UniProtKB/TrEMBL
CADAFUAG00001658	1.85454	0.898137	3.09438	0.290248	0.771626	0.999997	AFUA_6G11820	Afu6G11820	Glycosyl hydrolase family protein [Source:UniProtKB/TrEMBL
CADAFUAG00001659	423.758	0.443459	0.3498	1.26775	0.204888	0.999997	AFUA_6G08450	Afu6G08450	Nuclear polyadenylated RNA-binding protein Nab2; putative [Source:UniProtKB/TrEMBL
CADAFUAG00001660	88.1883	0.137771	0.57711	0.238726	0.811318	0.999997	AFUA_6G13650	Afu6G13650	Pro-apoptotic serine protease nma111 [Source:UniProtKB/Swiss-Prot
CADAFUAG00001661	53.745	-0.0268602	0.629745	-0.0426525	0.965979	0.999997	AFUA_6G10790	Afu6G10790	MFS amine transporter; putative [Source:UniProtKB/TrEMBL
CADAFUAG00001662	0	NA	NA	NA	NA	NA	AFUA_6G07010	Afu6G07010	C6 transcription factor RosA [Source:UniProtKB/TrEMBL
CADAFUAG00001663	6.03412	-0.368491	1.67425	-0.220093	0.825799	0.999997	AFUA_6G14640	Afu6G14640	MFS toxin transporter; putative [Source:UniProtKB/TrEMBL
CADAFUAG00001664	16.3844	-0.475883	1.08081	-0.440301	0.659719	0.999997	AFUA_6G10960	Afu6G10960	Putative uncharacterized protein [Source:UniProtKB/TrEMBL
CADAFUAG00001665	29.7857	0.10334	0.809587	0.127645	0.89843	0.999997	AFUA_6G14390	Afu6G14390	Extracelular cellulose binding protein (Cip2); putative [Source:UniProtKB/TrEMBL
CADAFUAG00001666	388.574	-0.487768	0.38537	-1.26571	0.205616	0.999997	AFUA_6G09380	Afu6G09380	Putative uncharacterized protein [Source:UniProtKB/TrEMBL
CADAFUAG00001667	271.543	-0.0494556	0.406375	-0.121699	0.903137	0.999997	AFUA_6G06500	Afu6G06500	Actin-related protein 2/3 complex subunit 1A; putative [Source:UniProtKB/TrEMBL
CADAFUAG00001668	90.491	0.737098	0.535739	1.37585	0.168867	0.999997	AFUA_6G12522	Afu6G12522	Stress response transcription factor SrrA/Skn7; putative [Source:UniProtKB/TrEMBL
CADAFUAG00001669	55.9911	0.842679	0.652464	1.29153	0.196519	0.999997	AFUA_6G07610	Afu6G07610	Putative uncharacterized protein [Source:UniProtKB/TrEMBL
CADAFUAG00001670	47.4164	0.405804	0.689967	0.58815	0.556432	0.999997	AFUA_6G06380	Afu6G06380	Methyltransferase; putative [Source:UniProtKB/TrEMBL
CADAFUAG00001671	33.2765	0.597977	0.814141	0.734489	0.462651	0.999997	AFUA_6G14250	Afu6G14250	Endosomal integral membrane protein (P24a); putative [Source:UniProtKB/TrEMBL
CADAFUAG00001672	2218.97	0.0815758	0.292296	0.279087	0.780178	0.999997	AFUA_6G10590	Afu6G10590	Ubiquitin-protein ligase (Asi3); putative [Source:UniProtKB/TrEMBL
CADAFUAG00001673	34.3227	0.398323	0.816778	0.487675	0.62578	0.999997	AFUA_6G08980	Afu6G08980	FF domain protein [Source:UniProtKB/TrEMBL
CADAFUAG00001674	0	NA	NA	NA	NA	NA	AFUA_6G07020	Afu6G07020	SAM and PH domain protein (Boi1); putative [Source:UniProtKB/TrEMBL
CADAFUAG00001675	1.22284	3.07468	4.01507	0.765784	0.443805	NA	AFUA_6G09356	Afu6G09356	Putative uncharacterized protein [Source:UniProtKB/TrEMBL
CADAFUAG00001676	30.5029	0.33207	0.806443	0.411771	0.680507	0.999997	AFUA_6G13230	Afu6G13230	Nitrilase family protein (Nit3); putative [Source:UniProtKB/TrEMBL
CADAFUAG00001677	1876.47	-0.0388277	0.296858	-0.130795	0.895937	0.999997	AFUA_6G12300	Afu6G12300	RNP domain protein [Source:UniProtKB/TrEMBL
CADAFUAG00001678	2.47144	-1.8102	2.56337	-0.70618	0.480076	0.999997	AFUA_6G11970	Afu6G11970	WSC domain protein; putative [Source:UniProtKB/TrEMBL
CADAFUAG00001679	687.375	0.000472829	0.32069	0.00147441	0.998824	0.999997	AFUA_6G08270	Afu6G08270	Putative uncharacterized protein [Source:UniProtKB/TrEMBL
CADAFUAG00001680	0.282951	1.04089	6.11615	0.170187	0.864863	NA	AFUA_6G09760	Afu6G09760	Cytochrome P450 monooxygenase; putative [Source:UniProtKB/TrEMBL
CADAFUAG00001681	1989.5	-0.350027	0.300959	-1.16304	0.244814	0.999997	AFUA_6G07760	Afu6G07760	Proteasome regulatory particle subunit (RpnG); putative [Source:UniProtKB/TrEMBL
CADAFUAG00001682	14.9938	0.484878	1.12092	0.432571	0.665327	0.999997	AFUA_6G08060	Afu6G08060	Putative uncharacterized protein [Source:UniProtKB/TrEMBL
CADAFUAG00001683	21.2198	0.240899	0.944707	0.254998	0.798725	0.999997	AFUA_6G11210	Afu6G11210	3-oxoacyl-(Acyl-carrier-protein) reductase [Source:UniProtKB/TrEMBL
CADAFUAG00001684	363.847	0.566653	0.370666	1.52874	0.126328	0.999997	AFUA_6G11620	Afu6G11620	Formyltetrahydrofolate deformylase; putative [Source:UniProtKB/TrEMBL
CADAFUAG00001685	254.74	-0.297771	0.382582	-0.778319	0.436381	0.999997	AFUA_6G06350	Afu6G06350	Proteasome subunit alpha type 3; putative [Source:UniProtKB/TrEMBL
CADAFUAG00001686	14.8479	-0.408167	1.10456	-0.36953	0.711733	0.999997	AFUA_6G09360	Afu6G09360	Proline-glycine rich protein; putative [Source:UniProtKB/TrEMBL
CADAFUAG00001687	69.6875	0.50656	0.577486	0.877181	0.380388	0.999997	AFUA_6G12240	Afu6G12240	Glycerophosphoryl diester phosphodiesterase family protein [Source:UniProtKB/TrEMBL
CADAFUAG00001688	1.83426	3.65965	3.49599	1.04681	0.295185	0.999997	AFUA_6G14540	Afu6G14540	Endo-1;3(4)-beta-glucanase; putative [Source:UniProtKB/TrEMBL
CADAFUAG00001689	38.4333	-0.292292	0.721725	-0.404992	0.685484	0.999997	AFUA_6G06930	Afu6G06930	Short chain dehydrogenase; putative [Source:UniProtKB/TrEMBL
CADAFUAG00001690	72.8152	0.315957	0.596497	0.529687	0.596329	0.999997	AFUA_6G07620	Afu6G07620	GDP-mannose pyrophosphorylase A [Source:UniProtKB/TrEMBL
CADAFUAG00001691	12049.9	-0.274522	0.304897	-0.900376	0.36792	0.999997	AFUA_6G10470	Afu6G10470	Zinc finger protein ZPR1 [Source:UniProtKB/TrEMBL
CADAFUAG00001692	32.716	0.30095	0.806685	0.37307	0.709096	0.999997	AFUA_6G08240	Afu6G08240	HEAT repeat protein (DRIM); putative [Source:UniProtKB/TrEMBL
CADAFUAG00001693	7.5459	-2.42377	1.59958	-1.51526	0.129707	0.999997	AFUA_6G07230	Afu6G07230	C6 transcription factor; putative [Source:UniProtKB/TrEMBL
CADAFUAG00001694	163.523	-0.374748	0.449529	-0.833645	0.404481	0.999997	AFUA_6G12680	Afu6G12680	HIT domain protein [Source:UniProtKB/TrEMBL
CADAFUAG00001695	94.7018	0.431694	0.520521	0.82935	0.406906	0.999997	AFUA_6G12760	Afu6G12760	GPI transamidase component (GAA1); putative [Source:UniProtKB/TrEMBL
CADAFUAG00001696	2746.35	0.0391564	0.295204	0.132642	0.894477	0.999997	AFUA_6G07430	Afu6G07430	Pyruvate kinase [Source:UniProtKB/TrEMBL
CADAFUAG00001697	7.88866	-0.104061	1.4839	-0.0701266	0.944093	0.999997	AFUA_6G11490	Afu6G11490	NUDIX domain protein [Source:UniProtKB/TrEMBL
CADAFUAG00001698	3.25449	-0.184284	2.26621	-0.081318	0.935189	0.999997	AFUA_6G14570	Afu6G14570	Putative uncharacterized protein [Source:UniProtKB/TrEMBL
CADAFUAG00001699	112.95	0.521444	0.48539	1.07428	0.282697	0.999997	AFUA_6G09710	Afu6G09710	MFS gliotoxin efflux transporter GliA [Source:UniProtKB/TrEMBL
CADAFUAG00001700	445.459	-0.330421	0.353444	-0.93486	0.349861	0.999997	AFUA_6G08650	Afu6G08650	Putative uncharacterized protein [Source:UniProtKB/TrEMBL
CADAFUAG00001701	0	NA	NA	NA	NA	NA	AFUA_6G14690	Afu6G14690	Telomere-associated RecQ helicase; putative [Source:UniProtKB/TrEMBL
CADAFUAG00001702	12.1434	0.514086	1.24195	0.413934	0.678922	0.999997	AFUA_6G12800	Afu6G12800	Uroporphyrinogen-III synthase (UroS); putative [Source:UniProtKB/TrEMBL
CADAFUAG00001703	332.826	0.0251699	0.37991	0.0662523	0.947177	0.999997	AFUA_6G09150	Afu6G09150	Putative uncharacterized protein [Source:UniProtKB/TrEMBL
CADAFUAG00001704	1719.39	0.459207	0.300482	1.52824	0.126454	0.999997	AFUA_6G13190	Afu6G13190	H+/nucleoside cotransporter [Source:UniProtKB/TrEMBL
CADAFUAG00001705	70.7824	0.62638	0.627142	0.998785	0.317899	0.999997	AFUA_6G06890	Afu6G06890	KOW motif domain protein [Source:UniProtKB/TrEMBL
CADAFUAG00001706	164.438	0.554753	0.455959	1.21667	0.223728	0.999997	AFUA_6G10330	Afu6G10330	GTP binding protein (SPG1); putative [Source:UniProtKB/TrEMBL
CADAFUAG00001707	1258.98	-0.111534	0.303287	-0.367751	0.713059	0.999997	AFUA_6G06640	Afu6G06640	FK506 suppressor Sfk1; putative [Source:UniProtKB/TrEMBL
CADAFUAG00001708	552.668	0.637576	0.337382	1.88978	0.058788	0.999997	AFUA_6G12600	Afu6G12600	WD repeat protein [Source:UniProtKB/TrEMBL
CADAFUAG00001709	164.929	-0.426659	0.449913	-0.948315	0.342969	0.999997	AFUA_6G10210	Afu6G10210	Guanine deaminase; putative [Source:UniProtKB/TrEMBL
CADAFUAG00001710	845.438	0.141106	0.315167	0.44772	0.654356	0.999997	AFUA_6G13030	Afu6G13030	Cell division control protein Cdc4; putative [Source:UniProtKB/TrEMBL
CADAFUAG00001711	974.497	-0.355171	0.323862	-1.09668	0.272783	0.999997	AFUA_6G06910	Afu6G06910	Putative uncharacterized protein [Source:UniProtKB/TrEMBL
CADAFUAG00001712	684.163	-0.206995	0.320404	-0.646045	0.51825	0.999997	AFUA_6G13300	Afu6G13300	GTP-binding nuclear protein Ran; putative [Source:UniProtKB/TrEMBL
CADAFUAG00001713	26.7231	0.156661	0.851823	0.183912	0.854082	0.999997	AFUA_6G10680	Afu6G10680	XAP5 domain protein [Source:UniProtKB/TrEMBL
CADAFUAG00001714	329.627	-1.12528	0.372088	-3.02425	0.00249254	0.446592	AFUA_6G13950	Afu6G13950	Integral membrane protein [Source:UniProtKB/TrEMBL
CADAFUAG00001715	196.632	0.273008	0.409807	0.666188	0.505291	0.999997	AFUA_6G12180	Afu6G12180	Putative uncharacterized protein [Source:UniProtKB/TrEMBL
CADAFUAG00001716	1245.9	-0.930514	0.302044	-3.08073	0.00206497	0.399681	AFUA_6G14370	Afu6G14370	AraC-like ligand binding domain protein; putative [Source:UniProtKB/TrEMBL
CADAFUAG00001717	10160.1	-0.0384469	0.294784	-0.130424	0.896231	0.999997	AFUA_6G08880	Afu6G08880	Ubiquitin-protein ligase Ufd4; putative [Source:UniProtKB/TrEMBL
CADAFUAG00001718	384.138	0.317237	0.35183	0.901676	0.367229	0.999997	AFUA_6G09080	Afu6G09080	VHS domain protein [Source:UniProtKB/TrEMBL
CADAFUAG00001719	4.54313	-0.0824282	1.94197	-0.0424457	0.966143	0.999997	AFUA_6G09030	Afu6G09030	Putative uncharacterized protein [Source:UniProtKB/TrEMBL
CADAFUAG00001720	53.7746	0.169188	0.6341	0.266816	0.789611	0.999997	AFUA_6G14170	Afu6G14170	CDF zinc transporter (Msc2); putaitve [Source:UniProtKB/TrEMBL
CADAFUAG00001721	3.32525	0.676558	2.33853	0.289309	0.772345	0.999997	AFUA_6G14560	Afu6G14560	Hexose transporter; putative [Source:UniProtKB/TrEMBL
CADAFUAG00001722	1.96585	-0.412469	2.86317	-0.144061	0.885453	0.999997	AFUA_6G11810	Afu6G11810	RTA1 domain protein; putative [Source:UniProtKB/TrEMBL
CADAFUAG00001723	4919.46	0.383658	0.287552	1.33422	0.182132	0.999997	AFUA_6G07780	Afu6G07780	Copper fist DNA binding domain protein [Source:UniProtKB/TrEMBL
CADAFUAG00001724	424.634	0.210316	0.344538	0.610429	0.541578	0.999997	AFUA_6G08070	Afu6G08070	Putative uncharacterized protein [Source:UniProtKB/TrEMBL
CADAFUAG00001725	16.7375	-0.125408	1.04902	-0.119548	0.904842	0.999997	AFUA_6G11670	Afu6G11670	Flavin-containing amine oxidasedehydrogenase; putative [Source:UniProtKB/TrEMBL
CADAFUAG00001726	324.919	0.326661	0.376524	0.86757	0.38563	0.999997	AFUA_6G13640	Afu6G13640	Putative uncharacterized protein [Source:UniProtKB/TrEMBL
CADAFUAG00001727	1489.32	-0.33702	0.332651	-1.01314	0.310995	0.999997	AFUA_6G10940	Afu6G10940	Putative uncharacterized protein [Source:UniProtKB/TrEMBL
CADAFUAG00001728	422.844	0.411999	0.35019	1.1765	0.239395	0.999997	AFUA_6G07380	Afu6G07380	Putative uncharacterized protein [Source:UniProtKB/TrEMBL
CADAFUAG00001729	997.016	-0.235546	0.308365	-0.763855	0.444954	0.999997	AFUA_6G13540	Afu6G13540	Carboxypeptidase Y homolog A [Source:UniProtKB/Swiss-Prot
CADAFUAG00001730	125.982	-0.129846	0.461979	-0.281064	0.778661	0.999997	AFUA_6G08830	Afu6G08830	2-oxoisovalerate dehydrogenase complex alpha subunit; putative [Source:UniProtKB/TrEMBL
CADAFUAG00001731	69.7396	0.145755	0.586606	0.248472	0.803769	0.999997	AFUA_6G12920	Afu6G12920	C2H2 finger domain protein; putative [Source:UniProtKB/TrEMBL
CADAFUAG00001732	123.406	0.377701	0.470464	0.802828	0.422074	0.999997	AFUA_6G09165	Afu6G09165	Ubiquitin-like protein ATG12 [Source:UniProtKB/Swiss-Prot
CADAFUAG00001733	17.1723	-0.488144	1.05691	-0.461858	0.644183	0.999997	AFUA_6G11060	Afu6G11060	DnaJ domain protein [Source:UniProtKB/TrEMBL
CADAFUAG00001734	10.4204	-0.0422735	1.31393	-0.0321733	0.974334	0.999997	AFUA_6G11110	Afu6G11110	C6 transcription factor; putative [Source:UniProtKB/TrEMBL
CADAFUAG00001735	5.07395	-0.351064	1.82844	-0.192002	0.847741	0.999997	AFUA_6G11590	Afu6G11590	4-carboxymuconolactone decarboxylase family protein [Source:UniProtKB/TrEMBL
CADAFUAG00001736	14.7876	-0.735415	1.11724	-0.658245	0.510381	0.999997	AFUA_6G14020	Afu6G14020	Putative uncharacterized protein [Source:UniProtKB/TrEMBL
CADAFUAG00001737	3011.54	0.498225	0.289376	1.72172	0.0851196	0.999997	AFUA_6G13440	Afu6G13440	Choline sulfatase; putative [Source:UniProtKB/TrEMBL
CADAFUAG00001738	3.95695	0.226496	2.07711	0.109044	0.913168	0.999997	AFUA_6G08340	Afu6G08340	MFS transporter; putative [Source:UniProtKB/TrEMBL
CADAFUAG00001739	121.19	0.956162	0.481648	1.98519	0.0471233	0.999997	AFUA_6G11720	Afu6G11720	Putative uncharacterized protein [Source:UniProtKB/TrEMBL
CADAFUAG00001740	54.7517	-0.475946	0.625758	-0.760592	0.446901	0.999997	AFUA_6G07750	Afu6G07750	MFS phospholipid transporter (Git1); putative [Source:UniProtKB/TrEMBL
CADAFUAG00001741	197.203	-0.156757	0.405612	-0.38647	0.699148	0.999997	AFUA_6G13290	Afu6G13290	SWI/SNF family DNA-dependent ATPase Ris1; putative [Source:UniProtKB/TrEMBL
CADAFUAG00001742	6.99976	-1.36891	1.55499	-0.880332	0.378679	0.999997	AFUA_6G14610	Afu6G14610	Alfa-L-rhamnosidase; putative [Source:UniProtKB/TrEMBL
CADAFUAG00001743	13.2203	-0.337175	1.16695	-0.288938	0.772629	0.999997	AFUA_6G06480	Afu6G06480	Putative uncharacterized protein [Source:UniProtKB/TrEMBL
CADAFUAG00001744	156.693	-0.184331	0.432099	-0.426594	0.669675	0.999997	AFUA_6G07640	Afu6G07640	Lysine--tRNA ligase [Source:UniProtKB/TrEMBL
CADAFUAG00001745	3.42613	0.750125	2.30376	0.325609	0.74472	0.999997	AFUA_6G11760	Afu6G11760	Putative uncharacterized protein [Source:UniProtKB/TrEMBL
CADAFUAG00001746	3.41133	-0.78373	2.18116	-0.359317	0.719358	0.999997	AFUA_6G10850	Afu6G10850	Putative uncharacterized protein [Source:UniProtKB/TrEMBL
CADAFUAG00001747	701.533	-0.290193	0.32902	-0.881991	0.377781	0.999997	AFUA_6G10360	Afu6G10360	Protein required for cell viability; putative [Source:UniProtKB/TrEMBL
CADAFUAG00001748	64.688	0.636688	0.651466	0.977315	0.328413	0.999997	AFUA_6G11120	Afu6G11120	ATP-dependent RNA helicase dbp10 [Source:UniProtKB/Swiss-Prot
CADAFUAG00001749	140.397	-0.457407	0.447608	-1.02189	0.306833	0.999997	AFUA_6G12410	Afu6G12410	1;3-beta-glucanosyltransferase; putative [Source:UniProtKB/TrEMBL
CADAFUAG00001750	1.59683	3.45262	3.71673	0.928941	0.35292	0.999997	AFUA_6G11440	Afu6G11440	Pyridoxamine phosphate oxidase family protein [Source:UniProtKB/TrEMBL
CADAFUAG00001751	64.9441	-0.0826905	0.58618	-0.141067	0.887817	0.999997	AFUA_6G11170	Afu6G11170	C2H2 finger domain protein (Ezf); putative [Source:UniProtKB/TrEMBL
CADAFUAG00001752	31.3759	1.10877	0.836749	1.32509	0.185142	0.999997	AFUA_6G08210	Afu6G08210	GINS DNA replication complex subunit Sld5; putative [Source:UniProtKB/TrEMBL
CADAFUAG00001753	30.2808	0.0536747	0.811853	0.0661138	0.947287	0.999997	AFUA_6G07630	Afu6G07630	Dynamin GTPase; putative [Source:UniProtKB/TrEMBL
CADAFUAG00001754	551.183	-0.187166	0.344702	-0.542979	0.587144	0.999997	AFUA_6G07980	Afu6G07980	Cell division control protein 2 kinase; putative [Source:UniProtKB/TrEMBL
CADAFUAG00001755	37949.7	0.0537922	0.295273	0.182178	0.855443	0.999997	AFUA_6G08390	Afu6G08390	Putative uncharacterized protein [Source:UniProtKB/TrEMBL
CADAFUAG00001756	0	NA	NA	NA	NA	NA	AFUA_6G09550	Afu6G09550	RTA1 domain protein; putative [Source:UniProtKB/TrEMBL
CADAFUAG00001757	3.02254	-2.88797	2.56177	-1.12733	0.259602	0.999997	AFUA_6G11840	Afu6G11840	Sodium bile acid symporter family protein [Source:UniProtKB/TrEMBL
CADAFUAG00001758	0	NA	NA	NA	NA	NA	AFUA_6G09530	Afu6G09530	Putative uncharacterized protein [Source:UniProtKB/TrEMBL
CADAFUAG00001759	20.27	-0.341865	1.00248	-0.341019	0.733089	0.999997	AFUA_6G07920	Afu6G07920	Acetyltransferase; GNAT family family [Source:UniProtKB/TrEMBL
CADAFUAG00001760	36.5228	-0.279646	0.736266	-0.379817	0.704082	0.999997	AFUA_6G08940	Afu6G08940	Putative uncharacterized protein [Source:UniProtKB/TrEMBL
CADAFUAG00001761	42.3518	0.879623	0.753105	1.168	0.242809	0.999997	AFUA_6G06490	Afu6G06490	U1 small nuclear ribonucleoprotein A; putative [Source:UniProtKB/TrEMBL
CADAFUAG00001762	226.649	-0.0487713	0.393448	-0.123959	0.901348	0.999997	AFUA_6G07280	Afu6G07280	ABC transporter (Adp1); putative [Source:UniProtKB/TrEMBL
CADAFUAG00001763	1663.35	-0.704765	0.380423	-1.85258	0.0639419	0.999997	AFUA_6G12160	Afu6G12160	C6 transcription factor; putative [Source:UniProtKB/TrEMBL
CADAFUAG00001764	14693.7	0.0909727	0.300235	0.303005	0.761886	0.999997	AFUA_6G09930	Afu6G09930	BZIP transcription factor AP-1/Yap1; putative [Source:UniProtKB/TrEMBL
CADAFUAG00001765	20.8058	-0.169127	0.944903	-0.178989	0.857947	0.999997	AFUA_6G08020	Afu6G08020	ABC transporter; putative [Source:UniProtKB/TrEMBL
CADAFUAG00001766	494.208	0.322815	0.336808	0.958456	0.337833	0.999997	AFUA_6G08570	Afu6G08570	DNA damage repair protein Mus42; putative [Source:UniProtKB/TrEMBL
CADAFUAG00001767	2.51695	-1.75863	2.54982	-0.689705	0.49038	0.999997	AFUA_6G14580	Afu6G14580	C6 finger domain protein; putative [Source:UniProtKB/TrEMBL
CADAFUAG00001768	442.285	-0.0969718	0.357764	-0.27105	0.786353	0.999997	AFUA_6G12580	Afu6G12580	Anthranilate synthase component I; putative [Source:UniProtKB/TrEMBL
CADAFUAG00001769	680.198	0.150333	0.350765	0.428587	0.668224	0.999997	AFUA_6G14330	Afu6G14330	5-oxo-L-prolinase; putative [Source:UniProtKB/TrEMBL
CADAFUAG00001770	2611.74	-0.36333	0.291272	-1.24739	0.212254	0.999997	AFUA_6G13670	Afu6G13670	Reticulon-like protein [Source:UniProtKB/TrEMBL
CADAFUAG00001771	14.8879	0.0993684	1.11351	0.0892392	0.928892	0.999997	AFUA_6G10620	Afu6G10620	Nuclear pore complex subunit; putative [Source:UniProtKB/TrEMBL
CADAFUAG00001772	4152.78	-0.0154073	0.286312	-0.0538128	0.957084	0.999997	AFUA_6G09320	Afu6G09320	LysM domain protein; putative [Source:UniProtKB/TrEMBL
CADAFUAG00001773	207.907	0.0947249	0.470665	0.201258	0.840497	0.999997	AFUA_6G08740	Afu6G08740	3-dehydroshikimate dehydratase; putative [Source:UniProtKB/TrEMBL
CADAFUAG00001774	202.427	-0.481089	0.402842	-1.19424	0.232385	0.999997	AFUA_6G12720	Afu6G12720	40S ribosomal protein S29; putative [Source:UniProtKB/TrEMBL
CADAFUAG00001775	40.5389	0.28249	0.732024	0.385903	0.699569	0.999997	AFUA_6G11240	Afu6G11240	Putative uncharacterized protein [Source:UniProtKB/TrEMBL
CADAFUAG00001776	2.62279	0.216562	2.51599	0.0860744	0.931407	0.999997	AFUA_6G09780	Afu6G09780	Class V chitinase; putative [Source:UniProtKB/TrEMBL
CADAFUAG00001777	75.9409	-0.094269	0.553262	-0.170388	0.864705	0.999997	AFUA_6G13310	Afu6G13310	26S proteasome non-ATPase regulatory subunit Nas2; putative [Source:UniProtKB/TrEMBL
CADAFUAG00001778	23.6956	0.346126	0.924013	0.37459	0.707966	0.999997	AFUA_6G11540	Afu6G11540	Putative uncharacterized protein [Source:UniProtKB/TrEMBL
CADAFUAG00001779	23.5892	0.712762	0.921096	0.773819	0.439038	0.999997	AFUA_6G12320	Afu6G12320	Putative uncharacterized protein [Source:UniProtKB/TrEMBL
CADAFUAG00001780	1867.3	-0.0196626	0.300223	-0.0654933	0.947781	0.999997	AFUA_6G10340	Afu6G10340	Putative uncharacterized protein [Source:UniProtKB/TrEMBL
CADAFUAG00001781	5.84221	-0.45447	1.74437	-0.260535	0.794451	0.999997	AFUA_6G12050	Afu6G12050	Nonribosomal peptide synthetase 11 [Source:UniProtKB/Swiss-Prot
CADAFUAG00001782	14.3022	-0.661351	1.11826	-0.591409	0.554246	0.999997	AFUA_6G10160	Afu6G10160	Putative uncharacterized protein [Source:UniProtKB/TrEMBL
CADAFUAG00001783	34.3699	-0.419689	0.77878	-0.538907	0.589951	0.999997	AFUA_6G11890	Afu6G11890	Dynamin GTPase; putative [Source:UniProtKB/TrEMBL
CADAFUAG00001784	3.03734	-1.09796	2.34476	-0.468258	0.6396	0.999997	AFUA_6G09680	Afu6G09680	O-methyltransferase GliM [Source:UniProtKB/TrEMBL
CADAFUAG00001785	834.63	-0.632149	0.349407	-1.80921	0.0704191	0.999997	AFUA_6G06830	Afu6G06830	Mediator of RNA polymerase II transcription subunit 18 [Source:UniProtKB/Swiss-Prot
CADAFUAG00001786	0	NA	NA	NA	NA	NA	AFUA_6G14720	Afu6G14720	Telomere-associated RecQ helicase; putative [Source:UniProtKB/TrEMBL
CADAFUAG00001787	10.8898	0.855952	1.36629	0.626479	0.531001	0.999997	AFUA_6G09130	Afu6G09130	Putative uncharacterized protein [Source:UniProtKB/TrEMBL
CADAFUAG00001788	177.277	0.222166	0.439002	0.50607	0.612807	0.999997	AFUA_6G06680	Afu6G06680	MFS transporter; putative [Source:UniProtKB/TrEMBL
CADAFUAG00001789	74.3122	0.135107	0.561161	0.240764	0.809738	0.999997	AFUA_6G07170	Afu6G07170	Putative uncharacterized protein [Source:UniProtKB/TrEMBL
CADAFUAG00001790	2803.7	-0.173635	0.335727	-0.517191	0.605023	0.999997	AFUA_6G10120	Afu6G10120	Zinc-binding oxidoreductase ToxD; putative [Source:UniProtKB/TrEMBL
CADAFUAG00001791	68.3506	-0.0479343	0.594985	-0.0805639	0.935789	0.999997	AFUA_6G10250	Afu6G10250	Tripeptidyl-peptidase sed1 [Source:UniProtKB/Swiss-Prot
CADAFUAG00001792	25.8018	1.31066	0.930933	1.4079	0.15916	0.999997	AFUA_6G08380	Afu6G08380	WD repeat protein [Source:UniProtKB/TrEMBL
CADAFUAG00001793	2769.08	-0.170672	0.343487	-0.496881	0.619273	0.999997	AFUA_6G13930	Afu6G13930	LovB-like polyketide synthase; putative [Source:UniProtKB/TrEMBL
CADAFUAG00001794	532.025	0.800765	0.343467	2.33142	0.0197313	0.999997	AFUA_6G07830	Afu6G07830	Stromal membrane-associated protein [Source:UniProtKB/TrEMBL
CADAFUAG00001795	8.737	2.33239	1.65305	1.41096	0.158256	0.999997	AFUA_6G07150	Afu6G07150	Actin binding protein; putative [Source:UniProtKB/TrEMBL
CADAFUAG00001796	16.3273	0.657182	1.1281	0.582556	0.560192	0.999997	AFUA_6G12450	Afu6G12450	Chaperone/heat shock protein Hsp12; putative [Source:UniProtKB/TrEMBL
CADAFUAG00001797	108.711	0.0718072	0.528378	0.135901	0.891899	0.999997	AFUA_6G06590	Afu6G06590	DnaJ chaperone (Caj1); putative [Source:UniProtKB/TrEMBL
CADAFUAG00001798	19.618	-0.176379	0.989235	-0.178298	0.858489	0.999997	AFUA_6G14260	Afu6G14260	U3 small nucleolar ribonucleoprotein protein Lcp5; putative [Source:UniProtKB/TrEMBL
CADAFUAG00001799	1.9911	1.0074	3.03487	0.33194	0.739934	0.999997	AFUA_6G11030	Afu6G11030	RNA binding protein MSSP-2; putative [Source:UniProtKB/TrEMBL
CADAFUAG00001800	61.9945	0.806728	0.630807	1.27888	0.200938	0.999997	AFUA_6G13160	Afu6G13160	Serine/threonine protein kinase; putative [Source:UniProtKB/TrEMBL
CADAFUAG00001801	42.6973	0.190819	0.696171	0.274098	0.784009	0.999997	AFUA_6G14150	Afu6G14150	C6 transcription factor; putative [Source:UniProtKB/TrEMBL
CADAFUAG00001802	27.8697	0.446666	0.854465	0.522744	0.601153	0.999997	AFUA_6G12700	Afu6G12700	DASH complex component Dam1; putative [Source:UniProtKB/TrEMBL
CADAFUAG00001803	3238.61	0.254483	0.294576	0.863897	0.387644	0.999997	AFUA_6G09315	Afu6G09315	Putative uncharacterized protein [Source:UniProtKB/TrEMBL
CADAFUAG00001804	41.5863	-0.228646	0.702854	-0.32531	0.744946	0.999997	AFUA_6G13070	Afu6G13070	UDP-galactose transporter; putative [Source:UniProtKB/TrEMBL
CADAFUAG00001805	45.6518	-0.959388	0.685161	-1.40024	0.161442	0.999997	AFUA_6G11680	Afu6G11680	Thiamine pyrophosphate enzyme; putative [Source:UniProtKB/TrEMBL
CADAFUAG00001806	376.343	0.99009	0.361231	2.74088	0.00612756	0.733452	AFUA_6G12990	Afu6G12990	Cytosolic large ribosomal subunit protein L7A [Source:UniProtKB/TrEMBL
CADAFUAG00001807	0.722736	-1.30454	4.8333	-0.269907	0.787232	NA	AFUA_6G12120	Afu6G12120	BNR/Asp-box repeat domain protein [Source:UniProtKB/TrEMBL
CADAFUAG00001808	0.894372	2.62777	4.52062	0.581285	0.561048	NA	AFUA_6G09890	Afu6G09890	Putative uncharacterized protein [Source:UniProtKB/TrEMBL
CADAFUAG00001809	3249.92	0.661267	0.29749	2.22282	0.0262277	0.999997	AFUA_6G10660	Afu6G10660	ATP citrate lyase subunit (Acl); putatibe [Source:UniProtKB/TrEMBL
CADAFUAG00001810	2.38536	0.00586734	2.67807	0.00219088	0.998252	0.999997	AFUA_6G10800	Afu6G10800	Carboxylesterase; putative [Source:UniProtKB/TrEMBL
CADAFUAG00001811	1163.91	-0.358502	0.325052	-1.10291	0.270068	0.999997	AFUA_6G06550	Afu6G06550	SNF2 family helicase/ATPase; putative [Source:UniProtKB/TrEMBL
CADAFUAG00001812	1.26836	3.12136	4.00219	0.779912	0.435443	NA	AFUA_6G09800	Afu6G09800	Ankyrin repeat protein [Source:UniProtKB/TrEMBL
CADAFUAG00001813	554.4	0.438791	0.339456	1.29263	0.196139	0.999997	AFUA_6G08660	Afu6G08660	M protein repeat protein [Source:UniProtKB/TrEMBL
CADAFUAG00001814	2.20825	3.92224	3.32867	1.17832	0.238669	0.999997	AFUA_6G10190	Afu6G10190	Putative uncharacterized protein [Source:UniProtKB/TrEMBL
CADAFUAG00001815	1107.17	0.148074	0.326308	0.453787	0.649982	0.999997	AFUA_6G13180	Afu6G13180	CECR1 family adenosine deaminase; putative [Source:UniProtKB/TrEMBL
CADAFUAG00001816	7.30299	-1.53936	1.54423	-0.996842	0.318841	0.999997	AFUA_6G10670	Afu6G10670	Putative uncharacterized protein [Source:UniProtKB/TrEMBL
CADAFUAG00001817	187.011	0.299026	0.422582	0.707617	0.479183	0.999997	AFUA_6G07460	Afu6G07460	Putative uncharacterized protein [Source:UniProtKB/TrEMBL
CADAFUAG00001818	357.672	-0.652207	0.376801	-1.7309	0.0834689	0.999997	AFUA_6G06920	Afu6G06920	Methionyl-tRNA formyltransferase family protein; putative [Source:UniProtKB/TrEMBL
CADAFUAG00001819	21133.4	0.0267531	0.288665	0.0926787	0.926159	0.999997	AFUA_6G13210	Afu6G13210	Oxidoreductase; short-chain dehydrogenase/reductase family [Source:UniProtKB/TrEMBL
CADAFUAG00001820	17.4454	-0.456096	1.01789	-0.44808	0.654095	0.999997	AFUA_6G11850	Afu6G11850	Putative uncharacterized protein [Source:UniProtKB/TrEMBL
CADAFUAG00001821	74.9325	0.526378	0.564456	0.932541	0.351057	0.999997	AFUA_6G13430	Afu6G13430	Multispanning membrane protein; putative [Source:UniProtKB/TrEMBL
CADAFUAG00001822	38.2288	0.944491	0.748803	1.26133	0.207189	0.999997	AFUA_6G11130	Afu6G11130	Possible replication factor-a protein [Source:UniProtKB/TrEMBL
CADAFUAG00001823	5.77145	-0.871214	1.70324	-0.511504	0.608998	0.999997	AFUA_6G11020	Afu6G11020	3-hydroxyisobutyrate dehydrogenase [Source:UniProtKB/TrEMBL
CADAFUAG00001824	197.308	-0.437976	0.412813	-1.06096	0.28871	0.999997	AFUA_6G14110	Afu6G14110	Putative uncharacterized protein [Source:UniProtKB/TrEMBL
CADAFUAG00001825	14.0851	-0.863901	1.12513	-0.767823	0.442592	0.999997	AFUA_6G13830	Afu6G13830	Oxidoreductase; short chain dehydrogenase/reductase family [Source:UniProtKB/TrEMBL
CADAFUAG00001826	51.3454	-0.36392	0.638322	-0.57012	0.568596	0.999997	AFUA_6G10970	Afu6G10970	Putative uncharacterized protein [Source:UniProtKB/TrEMBL
CADAFUAG00001827	50.3545	-0.266886	0.646556	-0.412781	0.679767	0.999997	AFUA_6G07950	Afu6G07950	Fungal specific transcription factor; putative [Source:UniProtKB/TrEMBL
CADAFUAG00001828	22.2517	-0.769116	0.918237	-0.837601	0.402255	0.999997	AFUA_6G10560	Afu6G10560	DNA polymerase delta subunit 4; putative [Source:UniProtKB/TrEMBL
CADAFUAG00001829	0	NA	NA	NA	NA	NA	AFUA_6G14670	Afu6G14670	Putative uncharacterized protein [Source:UniProtKB/TrEMBL
CADAFUAG00001830	12394.1	-0.398939	0.314932	-1.26675	0.205245	0.999997	AFUA_6G14130	Afu6G14130	Ubiquitin conjugating enzyme; putative [Source:UniProtKB/TrEMBL
CADAFUAG00001831	450.094	0.31725	0.348519	0.910281	0.362674	0.999997	AFUA_6G06630	Afu6G06630	Putative uncharacterized protein [Source:UniProtKB/TrEMBL
CADAFUAG00001832	863.738	0.924012	0.335999	2.75005	0.00595869	0.733452	AFUA_6G13460	Afu6G13460	Putative uncharacterized protein [Source:UniProtKB/TrEMBL
CADAFUAG00001833	239.625	0.017362	0.387939	0.0447544	0.964303	0.999997	AFUA_6G09090	Afu6G09090	Putative uncharacterized protein [Source:UniProtKB/TrEMBL
CADAFUAG00001834	3.93171	-0.412925	2.07673	-0.198834	0.842392	0.999997	AFUA_6G09040	Afu6G09040	Probable feruloyl esterase B-2 [Source:UniProtKB/Swiss-Prot
CADAFUAG00001835	8631.47	-0.103093	0.305299	-0.33768	0.735605	0.999997	AFUA_6G07770	Afu6G07770	Alanine aminotransferase; putative [Source:UniProtKB/TrEMBL
CADAFUAG00001836	867.253	-0.34139	0.313833	-1.08781	0.27668	0.999997	AFUA_6G09335	Afu6G09335	SRF-type transcription factor family protein [Source:UniProtKB/TrEMBL
CADAFUAG00001837	588.477	-0.156355	0.334823	-0.46698	0.640515	0.999997	AFUA_6G07410	Afu6G07410	Putative uncharacterized protein [Source:UniProtKB/TrEMBL
CADAFUAG00001838	7.82337	-1.30085	1.5478	-0.840453	0.400655	0.999997	AFUA_6G13560	Afu6G13560	Putative uncharacterized protein [Source:UniProtKB/TrEMBL
CADAFUAG00001839	52.1844	-0.327238	0.635868	-0.514632	0.60681	0.999997	AFUA_6G11790	Afu6G11790	Putative uncharacterized protein [Source:UniProtKB/TrEMBL
CADAFUAG00001840	21.2159	-0.691583	0.944316	-0.732364	0.463947	0.999997	AFUA_6G10860	Afu6G10860	Putative uncharacterized protein [Source:UniProtKB/TrEMBL
CADAFUAG00001841	1274.8	-0.208559	0.30214	-0.690271	0.490024	0.999997	AFUA_6G10450	Afu6G10450	Putative uncharacterized protein [Source:UniProtKB/TrEMBL
CADAFUAG00001842	10.2137	-0.566237	1.31378	-0.430998	0.66647	0.999997	AFUA_6G07560	Afu6G07560	Transcription factor Rap1; putative [Source:UniProtKB/TrEMBL
CADAFUAG00001843	223.555	-0.0670227	0.405785	-0.165168	0.868812	0.999997	AFUA_6G07800	Afu6G07800	C6 finger domain protein; putative [Source:UniProtKB/TrEMBL
CADAFUAG00001844	206.691	0.0972405	0.402061	0.241855	0.808892	0.999997	AFUA_6G08840	Afu6G08840	Probable beta-mannosidase A [Source:UniProtKB/Swiss-Prot
CADAFUAG00001845	685.799	-0.392011	0.328929	-1.19178	0.233348	0.999997	AFUA_6G09740	Afu6G09740	Thioredoxin reductase GliT [Source:UniProtKB/TrEMBL
CADAFUAG00001846	2.01137	-0.368586	2.80996	-0.131171	0.89564	0.999997	AFUA_6G07240	Afu6G07240	4-hydroxybenzoate polyprenyl transferase; putative [Source:UniProtKB/TrEMBL
CADAFUAG00001847	15.6512	-0.280845	1.07255	-0.261849	0.793438	0.999997	AFUA_6G08610	Afu6G08610	RNA methylase family protein; putative [Source:UniProtKB/TrEMBL
CADAFUAG00001848	1.46027	3.33846	3.81221	0.87573	0.381177	0.999997	AFUA_6G12110	Afu6G12110	Salicylate synthetase; putative [Source:UniProtKB/TrEMBL
CADAFUAG00001849	116.53	-0.0727362	0.533747	-0.136275	0.891604	0.999997	AFUA_6G11700	Afu6G11700	Putative uncharacterized protein [Source:UniProtKB/TrEMBL
CADAFUAG00001850	17799.2	0.128985	0.308304	0.418368	0.675678	0.999997	AFUA_6G06370	Afu6G06370	NAD(+)-isocitrate dehydrogenase subunit I [Source:UniProtKB/TrEMBL
CADAFUAG00001851	182.938	0.0387939	0.430376	0.0901394	0.928176	0.999997	AFUA_6G10380	Afu6G10380	Cullin binding protein CanA; putative [Source:UniProtKB/TrEMBL
CADAFUAG00001852	4.08854	-0.895407	2.0019	-0.447277	0.654675	0.999997	AFUA_6G13710	Afu6G13710	Putative uncharacterized protein [Source:UniProtKB/TrEMBL
CADAFUAG00001853	37.7654	0.0633771	0.729826	0.0868387	0.9308	0.999997	AFUA_6G09600	Afu6G09600	Zinc metallopeptidase; putative [Source:UniProtKB/TrEMBL
CADAFUAG00001854	120.049	-0.03275	0.472669	-0.0692874	0.944761	0.999997	AFUA_6G10480	Afu6G10480	Peptidyl-prolyl cis-trans isomerase-like 3 [Source:UniProtKB/Swiss-Prot
CADAFUAG00001855	1.61711	0.631642	3.21409	0.196523	0.844201	0.999997	AFUA_6G12380	Afu6G12380	Cell wall glucanase (Scw4); putative [Source:UniProtKB/TrEMBL
CADAFUAG00001856	206.849	-0.0987977	0.403378	-0.244926	0.806514	0.999997	AFUA_6G06780	Afu6G06780	Proteasome regulatory particle subunit Rpt4; putative [Source:UniProtKB/TrEMBL
CADAFUAG00001857	13.6799	0.304138	1.15771	0.262706	0.792777	0.999997	AFUA_6G08800	Afu6G08800	Cellular morphogenesis protein (Bud22); putative [Source:UniProtKB/TrEMBL
CADAFUAG00001858	16.3728	0.661871	1.11579	0.593184	0.553058	0.999997	AFUA_6G10770	Afu6G10770	Tetratricopeptide repeat protein 1 (TTC1); putative [Source:UniProtKB/TrEMBL
CADAFUAG00001859	141.37	-0.673367	0.44941	-1.49834	0.134046	0.999997	AFUA_6G13480	Afu6G13480	Putative uncharacterized protein [Source:UniProtKB/TrEMBL
CADAFUAG00001860	339.033	-0.582733	0.393587	-1.48057	0.138722	0.999997	AFUA_6G07990	Afu6G07990	Oxidoreductase; 2OG-Fe(II) oxygenase family family [Source:UniProtKB/TrEMBL
CADAFUAG00001861	3623.96	0.0825903	0.293088	0.281793	0.778102	0.999997	AFUA_6G07700	Afu6G07700	Chromosomal organization and DNA repair protein Mms21; putative [Source:UniProtKB/TrEMBL
CADAFUAG00001862	24.9546	-0.0896941	0.875217	-0.102482	0.918374	0.999997	AFUA_6G08170	Afu6G08170	DNA polymerase V; putative [Source:UniProtKB/TrEMBL
CADAFUAG00001863	18.1616	0.855468	1.07361	0.796814	0.425559	0.999997	AFUA_6G11180	Afu6G11180	Putative uncharacterized protein [Source:UniProtKB/TrEMBL
CADAFUAG00001864	73.5813	-0.231124	0.556863	-0.415047	0.678107	0.999997	AFUA_6G09580	Afu6G09580	C6 finger domain protein; putative [Source:UniProtKB/TrEMBL
CADAFUAG00001865	244.125	0.264519	0.386853	0.68377	0.49412	0.999997	AFUA_6G14310	Afu6G14310	5'-nucleotidase; putative [Source:UniProtKB/TrEMBL
CADAFUAG00001866	253.401	0.487276	0.385516	1.26396	0.206245	0.999997	AFUA_6G13660	Afu6G13660	Putative uncharacterized protein [Source:UniProtKB/TrEMBL
CADAFUAG00001867	308.754	0.0332644	0.367274	0.090571	0.927833	0.999997	AFUA_6G12980	Afu6G12980	Spindle pole body component; putative [Source:UniProtKB/TrEMBL
CADAFUAG00001868	637.513	-0.0757923	0.32395	-0.233963	0.815014	0.999997	AFUA_6G13410	Afu6G13410	Pre-mRNA-splicing factor rse1 [Source:UniProtKB/Swiss-Prot
CADAFUAG00001869	66.8035	-1.35337	0.576106	-2.34917	0.0188154	0.999997	AFUA_6G09670	Afu6G09670	Cytochrome P450 oxidoreductase GliC [Source:UniProtKB/TrEMBL
CADAFUAG00001870	3064.94	0.311976	0.29	1.07578	0.282026	0.999997	AFUA_6G08750	Afu6G08750	Delta-1-pyrroline-5-carboxylate dehydrogenase PrnC [Source:UniProtKB/TrEMBL
CADAFUAG00001871	80.0909	-0.259746	0.550914	-0.471482	0.637297	0.999997	AFUA_6G11450	Afu6G11450	C6 transcription factor; putative [Source:UniProtKB/TrEMBL
CADAFUAG00001872	80.9222	0.241603	0.541225	0.446401	0.655308	0.999997	AFUA_6G14340	Afu6G14340	Glucooligosaccharide oxidase; putative [Source:UniProtKB/TrEMBL
CADAFUAG00001873	875.511	-0.0310907	0.324487	-0.0958149	0.923668	0.999997	AFUA_6G07520	Afu6G07520	Cell wall integrity signaling protein Lsp1/Pil1; putative [Source:UniProtKB/TrEMBL
CADAFUAG00001874	58.3287	-0.115422	0.610354	-0.189106	0.85001	0.999997	AFUA_6G10400	Afu6G10400	Putative uncharacterized protein [Source:UniProtKB/TrEMBL
CADAFUAG00001875	806.787	-0.0600082	0.332122	-0.180681	0.856618	0.999997	AFUA_6G08230	Afu6G08230	Mitochondrial import protein Zim17; putative [Source:UniProtKB/TrEMBL
CADAFUAG00001876	3.14814	4.43423	3.01219	1.4721	0.140995	0.999997	AFUA_6G13920	Afu6G13920	Adenylate-forming enzyme; putative [Source:UniProtKB/TrEMBL
CADAFUAG00001877	803.375	0.333156	0.31776	1.04845	0.294431	0.999997	AFUA_6G08420	Afu6G08420	Ubiquitin-protein ligase E3 component (UBR1); putative [Source:UniProtKB/TrEMBL
CADAFUAG00001878	7150.06	-0.395831	0.299031	-1.32371	0.1856	0.999997	AFUA_6G06460	Afu6G06460	Fumarylacetoacetate hydrolase family protein [Source:UniProtKB/TrEMBL
CADAFUAG00001879	109.642	-0.647354	0.510933	-1.267	0.205154	0.999997	AFUA_6G13400	Afu6G13400	Arsenate reductase (Arc2); putative [Source:UniProtKB/TrEMBL
CADAFUAG00001880	5.50877	-1.41058	1.77103	-0.796478	0.425754	0.999997	AFUA_6G08160	Afu6G08160	MOSC domain protein [Source:UniProtKB/TrEMBL
CADAFUAG00001881	8.63167	-0.476984	1.42109	-0.335647	0.737137	0.999997	AFUA_6G06940	Afu6G06940	UDP-N-acetylglucosamine transferase subunit alg14 [Source:UniProtKB/Swiss-Prot
CADAFUAG00001882	601.47	-0.0319007	0.327147	-0.097512	0.92232	0.999997	AFUA_6G13450	Afu6G13450	Nitrilase [Source:UniProtKB/TrEMBL
CADAFUAG00001883	99.2723	0.909661	0.554986	1.63907	0.101198	0.999997	AFUA_6G08010	Afu6G08010	Putative uncharacterized protein [Source:UniProtKB/TrEMBL
CADAFUAG00001884	81.8626	0.101927	0.537604	0.189594	0.849627	0.999997	AFUA_6G08560	Afu6G08560	NRPS-like enzyme; putative [Source:UniProtKB/TrEMBL
CADAFUAG00001885	3059.26	-0.000566108	0.300954	-0.00188104	0.998499	0.999997	AFUA_6G09120	Afu6G09120	Putative uncharacterized protein [Source:UniProtKB/TrEMBL
CADAFUAG00001886	1200.39	0.171588	0.306192	0.560394	0.575211	0.999997	AFUA_6G07160	Afu6G07160	IZH family channel protein (Izh3); putative [Source:UniProtKB/TrEMBL
CADAFUAG00001887	63.6302	-0.278618	0.603514	-0.46166	0.644325	0.999997	AFUA_6G07140	Afu6G07140	Putative uncharacterized protein [Source:UniProtKB/TrEMBL
CADAFUAG00001888	159.664	0.33607	0.464272	0.723866	0.469148	0.999997	AFUA_6G11560	Afu6G11560	Integral membrane protein; putative [Source:UniProtKB/TrEMBL
CADAFUAG00001889	376.738	-0.0513332	0.364964	-0.140653	0.888144	0.999997	AFUA_6G11270	Afu6G11270	Synaptobrevin-like protein Sybl1; putative [Source:UniProtKB/TrEMBL
CADAFUAG00001890	2.82515	-0.544049	2.67007	-0.203759	0.838542	0.999997	AFUA_6G12070	Afu6G12070	FAD binding domain protein [Source:UniProtKB/TrEMBL
CADAFUAG00001891	3.86591	0.186507	2.10262	0.0887022	0.929319	0.999997	AFUA_6G08155	Afu6G08155	Pyroglutamyl peptidase type I; putative [Source:UniProtKB/TrEMBL
CADAFUAG00001892	10.6578	0.00858464	1.31755	0.0065156	0.994801	0.999997	AFUA_6G07260	Afu6G07260	Purine-cytosine permease; putative [Source:UniProtKB/TrEMBL
CADAFUAG00001893	0	NA	NA	NA	NA	NA	AFUA_6G14700	Afu6G14700	Putative uncharacterized protein [Source:UniProtKB/TrEMBL
CADAFUAG00001894	241.766	0.222235	0.387946	0.572851	0.566746	0.999997	AFUA_6G12690	Afu6G12690	CRAL/TRIO domain protein [Source:UniProtKB/TrEMBL
CADAFUAG00001895	33.6521	-0.259897	0.770802	-0.337178	0.735983	0.999997	AFUA_6G07550	Afu6G07550	Putative uncharacterized protein [Source:UniProtKB/TrEMBL
CADAFUAG00001896	3.23422	0.631701	2.31644	0.272704	0.785081	0.999997	AFUA_6G10310	Afu6G10310	Putative uncharacterized protein [Source:UniProtKB/TrEMBL
CADAFUAG00001897	38.6186	0.323606	0.742037	0.436105	0.662761	0.999997	AFUA_6G13150	Afu6G13150	Putative uncharacterized protein [Source:UniProtKB/TrEMBL
CADAFUAG00001898	684.569	0.0818888	0.326762	0.250607	0.802118	0.999997	AFUA_6G09000	Afu6G09000	PHD finger domain protein; putative [Source:UniProtKB/TrEMBL
CADAFUAG00001899	6298.86	-0.202284	0.326185	-0.620152	0.535158	0.999997	AFUA_6G14210	Afu6G14210	Ubiquitin-conjugating enzyme E2 2 [Source:UniProtKB/Swiss-Prot
CADAFUAG00001900	4.74001	1.32518	2.01136	0.658848	0.509994	0.999997	AFUA_6G09830	Afu6G09830	Putative uncharacterized protein [Source:UniProtKB/TrEMBL
CADAFUAG00001901	4316.46	0.494988	0.286958	1.72495	0.0845366	0.999997	AFUA_6G10650	Afu6G10650	ATP citrate lyase; subunit 1; putative [Source:UniProtKB/TrEMBL
CADAFUAG00001902	72.076	-0.443941	0.558583	-0.794762	0.426752	0.999997	AFUA_6G14140	Afu6G14140	RTA1 domain protein; putative [Source:UniProtKB/TrEMBL
CADAFUAG00001903	226.568	-0.0608115	0.392654	-0.154873	0.876921	0.999997	AFUA_6G12950	Afu6G12950	Trehalose-phosphate synthase/phosphatase complex subunit Tps1; putative [Source:UniProtKB/TrEMBL
CADAFUAG00001904	4.3057	-0.208338	1.96856	-0.105833	0.915715	0.999997	AFUA_6G06360	Afu6G06360	Mating alpha-pheromone PpgA [Source:UniProtKB/TrEMBL
CADAFUAG00001905	135.072	-0.0705788	0.456659	-0.154555	0.877172	0.999997	AFUA_6G08410	Afu6G08410	Putative uncharacterized protein [Source:UniProtKB/TrEMBL
CADAFUAG00001906	81.2237	-0.52005	0.535709	-0.970771	0.331662	0.999997	AFUA_6G10060	Afu6G10060	F-actin-capping protein subunit alpha [Source:UniProtKB/Swiss-Prot
CADAFUAG00001907	92.208	0.0812838	0.524824	0.154878	0.876917	0.999997	AFUA_6G13750	Afu6G13750	Ferric-chelate reductase; putative [Source:UniProtKB/TrEMBL
CADAFUAG00001908	12.7307	-0.800303	1.18786	-0.673735	0.50048	0.999997	AFUA_6G12060	Afu6G12060	MAK1-like monooxygenase; putative [Source:UniProtKB/TrEMBL
CADAFUAG00001909	27.6926	0.649591	0.862188	0.753422	0.451196	0.999997	AFUA_6G12460	Afu6G12460	Putative uncharacterized protein [Source:UniProtKB/TrEMBL
CADAFUAG00001910	14.7316	-0.580066	1.10349	-0.525664	0.599122	0.999997	AFUA_6G13940	Afu6G13940	Cytochrome P450 monooxygenase; putative [Source:UniProtKB/TrEMBL
CADAFUAG00001911	0	NA	NA	NA	NA	NA	AFUA_6G11640	Afu6G11640	Fungal specific transcription factor; putative [Source:UniProtKB/TrEMBL
CADAFUAG00001912	344.434	0.688034	0.380226	1.80954	0.0703674	0.999997	AFUA_6G14230	Afu6G14230	Putative uncharacterized protein [Source:UniProtKB/TrEMBL
CADAFUAG00001913	681.702	0.0241228	0.323929	0.0744693	0.940637	0.999997	AFUA_6G12790	Afu6G12790	NADH-ubiquinone oxidoreductase 39 kDa subunit; putative [Source:UniProtKB/TrEMBL
CADAFUAG00001914	540.556	0.204187	0.333611	0.612051	0.540504	0.999997	AFUA_6G11010	Afu6G11010	Cell morphogenesis protein (PAG1); putative [Source:UniProtKB/TrEMBL
CADAFUAG00001915	0	NA	NA	NA	NA	NA	AFUA_6G07030	Afu6G07030	NACHT and Ankyrin domain protein [Source:UniProtKB/TrEMBL
CADAFUAG00001916	3465.86	0.547299	0.288257	1.89865	0.057611	0.999997	AFUA_6G08860	Afu6G08860	Sugar isomerase; KpsF/GutQ [Source:UniProtKB/TrEMBL
CADAFUAG00001917	0.960167	-0.459253	4.26691	-0.107631	0.914288	NA	AFUA_6G12130	Afu6G12130	C6 transcription factor; putative [Source:UniProtKB/TrEMBL
CADAFUAG00001918	552.615	-0.230273	0.355358	-0.648001	0.516984	0.999997	AFUA_6G07720	Afu6G07720	Phosphoenolpyruvate carboxykinase AcuF [Source:UniProtKB/TrEMBL
CADAFUAG00001919	87.9987	-0.103827	0.521804	-0.198977	0.842281	0.999997	AFUA_6G08470	Afu6G08470	Glycerol kinase; putative [Source:UniProtKB/TrEMBL
CADAFUAG00001920	901.524	0.276709	0.312765	0.884717	0.376309	0.999997	AFUA_6G13200	Afu6G13200	Autophagy-related protein 2 [Source:UniProtKB/Swiss-Prot
CADAFUAG00001921	76.5155	0.126751	0.557661	0.22729	0.820198	0.999997	AFUA_6G12370	Afu6G12370	Putative uncharacterized protein [Source:UniProtKB/TrEMBL
CADAFUAG00001922	31.9824	0.919016	0.839878	1.09423	0.273856	0.999997	AFUA_6G10460	Afu6G10460	Ceramide synthase membrane component (LAG1); putative [Source:UniProtKB/TrEMBL
CADAFUAG00001923	385.753	-0.326459	0.349968	-0.932826	0.35091	0.999997	AFUA_6G09590	Afu6G09590	Zinc alcohol dehydrogenase; putative [Source:UniProtKB/TrEMBL
CADAFUAG00001924	18.2235	-0.476419	1.01665	-0.468615	0.639345	0.999997	AFUA_6G09810	Afu6G09810	Nucleotide binding protein; putative [Source:UniProtKB/TrEMBL
CADAFUAG00001925	141.9	-0.662853	0.443639	-1.49413	0.135143	0.999997	AFUA_6G07710	Afu6G07710	Mitochondrial dicarboxylate carrier protein; putative [Source:UniProtKB/TrEMBL
CADAFUAG00001926	928.464	-0.855013	0.393476	-2.17297	0.0297825	0.999997	AFUA_6G14000	Afu6G14000	Toxin biosynthesis protein Tri7-like ; putative [Source:UniProtKB/TrEMBL
CADAFUAG00001927	6940.64	0.520568	0.285101	1.82591	0.0678644	0.999997	AFUA_6G07900	Afu6G07900	Probable HECT-type ubiquitin ligase-interacting protein creD [Source:UniProtKB/Swiss-Prot
CADAFUAG00001928	24.5998	0.423242	0.965663	0.438292	0.661175	0.999997	AFUA_6G08260	Afu6G08260	Putative uncharacterized protein [Source:UniProtKB/TrEMBL
CADAFUAG00001929	36.0117	0.0330287	0.746458	0.0442472	0.964707	0.999997	AFUA_6G12860	Afu6G12860	Mitochondrial protein Fmp26; putative [Source:UniProtKB/TrEMBL
CADAFUAG00001930	19.4063	-0.687706	0.986768	-0.696928	0.485848	0.999997	AFUA_6G07400	Afu6G07400	Putative uncharacterized protein [Source:UniProtKB/TrEMBL
CADAFUAG00001931	46.3449	0.483992	0.696634	0.694758	0.487207	0.999997	AFUA_6G08640	Afu6G08640	Mitochondrial intermediate peptidase [Source:UniProtKB/Swiss-Prot
CADAFUAG00001932	70.3756	0.0935188	0.575914	0.162383	0.871004	0.999997	AFUA_6G11410	Afu6G11410	Meiotic recombination protein Mre11 [Source:UniProtKB/TrEMBL
CADAFUAG00001933	5.98313	1.02374	1.77055	0.578203	0.563127	0.999997	AFUA_6G07660	Afu6G07660	Putative uncharacterized protein [Source:UniProtKB/TrEMBL
CADAFUAG00001934	55.809	0.837246	0.664235	1.26047	0.207501	0.999997	AFUA_6G11460	Afu6G11460	Nonsense-mediated mRNA decay protein Upf3; putative [Source:UniProtKB/TrEMBL
CADAFUAG00001935	9.41473	-0.00626635	1.38127	-0.00453664	0.99638	0.999997	AFUA_6G13090	Afu6G13090	Putative uncharacterized protein [Source:UniProtKB/TrEMBL
CADAFUAG00001936	0	NA	NA	NA	NA	NA	AFUA_6G11650	Afu6G11650	Short-chain dehydrogenase/reductase; putative [Source:UniProtKB/TrEMBL
CADAFUAG00001937	4.56837	0.514364	1.96057	0.262354	0.793048	0.999997	AFUA_6G09900	Afu6G09900	NAD binding Rossmann fold oxidoreductase; putative [Source:UniProtKB/TrEMBL
CADAFUAG00001938	268.461	-0.0561874	0.388241	-0.144723	0.88493	0.999997	AFUA_6G06760	Afu6G06760	Eukaryotic translation initiation factor 3 subunit J [Source:UniProtKB/Swiss-Prot
CADAFUAG00001939	769.175	-0.530479	0.321875	-1.64809	0.0993343	0.999997	AFUA_6G08320	Afu6G08320	Putative uncharacterized protein [Source:UniProtKB/TrEMBL
CADAFUAG00001940	1318.34	-0.669438	0.315982	-2.1186	0.0341245	0.999997	AFUA_6G13790	Afu6G13790	Flavin-binding monooxygenase; putative [Source:UniProtKB/TrEMBL
CADAFUAG00001941	7.54539	-0.831551	1.50291	-0.553293	0.580063	0.999997	AFUA_6G11910	Afu6G11910	Probable beta-glucosidase J [Source:UniProtKB/Swiss-Prot
CADAFUAG00001942	20.2903	0.0160814	0.971139	0.0165593	0.986788	0.999997	AFUA_6G09690	Afu6G09690	Glutathione S-transferase GliG [Source:UniProtKB/TrEMBL
CADAFUAG00001943	54.0887	-0.327712	0.677277	-0.483868	0.62848	0.999997	AFUA_6G12870	Afu6G12870	Iron-sulfur clusters transporter atm1; mitochondrial [Source:UniProtKB/Swiss-Prot
CADAFUAG00001944	230.792	-0.382511	0.388924	-0.98351	0.325356	0.999997	AFUA_6G06620	Afu6G06620	COPII vesicles protein Yip3; putative [Source:UniProtKB/TrEMBL
CADAFUAG00001945	1086.57	0.00837815	0.311511	0.0268952	0.978543	0.999997	AFUA_6G08810	Afu6G08810	NADH-ubiquinone oxidoreductase 304 kDa subunit [Source:UniProtKB/TrEMBL
CADAFUAG00001946	0.282951	1.04089	6.11615	0.170187	0.864863	NA	AFUA_6G09570	Afu6G09570	Putative uncharacterized protein [Source:UniProtKB/TrEMBL
CADAFUAG00001947	78.9136	0.787065	0.562991	1.39801	0.162111	0.999997	AFUA_6G08370	Afu6G08370	Sphingomyelinase family protein; putative [Source:UniProtKB/TrEMBL
CADAFUAG00001948	255.854	-0.0562669	0.381397	-0.147528	0.882715	0.999997	AFUA_6G08480	Afu6G08480	Aquaglyceroporin; putative [Source:UniProtKB/TrEMBL
CADAFUAG00001949	56.41	0.917612	0.678891	1.35163	0.176493	0.999997	AFUA_6G11250	Afu6G11250	C2H2 finger domain protein; putative [Source:UniProtKB/TrEMBL
CADAFUAG00001950	419.472	0.102515	0.347248	0.295222	0.767824	0.999997	AFUA_6G13550	Afu6G13550	Ribosomal protein S13p/S18e [Source:UniProtKB/TrEMBL
CADAFUAG00001951	591.402	0.406235	0.338728	1.1993	0.230412	0.999997	AFUA_6G07890	Afu6G07890	Telomere silencing protein Zds1; putative [Source:UniProtKB/TrEMBL
CADAFUAG00001952	175.213	0.0312952	0.419586	0.074586	0.940544	0.999997	AFUA_6G06535	Afu6G06535	Putative uncharacterized protein [Source:UniProtKB/TrEMBL
CADAFUAG00001953	17.1674	-0.221116	1.04885	-0.210817	0.83303	0.999997	AFUA_6G13270	Afu6G13270	Exo-beta-1;3-glucanase; putative [Source:UniProtKB/TrEMBL
CADAFUAG00001954	26.0163	-0.195008	0.857505	-0.227414	0.820102	0.999997	AFUA_6G08000	Afu6G08000	General amidase GmdA; putative [Source:UniProtKB/TrEMBL
CADAFUAG00001955	10.7291	-0.862847	1.30664	-0.660353	0.509027	0.999997	AFUA_6G13840	Afu6G13840	Putative uncharacterized protein [Source:UniProtKB/TrEMBL
CADAFUAG00001956	226.695	-0.0272904	0.40176	-0.0679271	0.945844	0.999997	AFUA_6G06710	Afu6G06710	Geranylgeranyl transferase beta subunit; putative [Source:UniProtKB/TrEMBL
CADAFUAG00001957	1563.52	-0.332197	0.299695	-1.10845	0.267667	0.999997	AFUA_6G06800	Afu6G06800	Probable carboxypeptidase AFUA_6G06800 [Source:UniProtKB/Swiss-Prot
CADAFUAG00001958	21.4314	0.269082	1.05751	0.254448	0.79915	0.999997	AFUA_6G07060	Afu6G07060	Alpha/beta hydrolase family protein; putative [Source:UniProtKB/TrEMBL
CADAFUAG00001959	14.6505	0.0636856	1.13087	0.0563156	0.95509	0.999997	AFUA_6G09500	Afu6G09500	DnaJ domain protein [Source:UniProtKB/TrEMBL
CADAFUAG00001960	5189.32	-0.339769	0.291667	-1.16492	0.244051	0.999997	AFUA_6G06770	Afu6G06770	Enolase [Source:UniProtKB/Swiss-Prot
CADAFUAG00001961	289.569	0.710374	0.400528	1.7736	0.07613	0.999997	AFUA_6G13360	Afu6G13360	Putative uncharacterized protein [Source:UniProtKB/TrEMBL
CADAFUAG00001962	230.378	-0.0894372	0.401953	-0.222507	0.82392	0.999997	AFUA_6G12280	Afu6G12280	NADH-ubiquinone oxidoreductase 213 kDa subunit [Source:UniProtKB/TrEMBL
CADAFUAG00001963	32.1754	0.352046	0.799046	0.440583	0.659515	0.999997	AFUA_6G12470	Afu6G12470	Conserved oligomeric Golgi complex subunit 6 [Source:UniProtKB/Swiss-Prot
CADAFUAG00001964	1008.84	-0.218611	0.322447	-0.677973	0.497789	0.999997	AFUA_6G10890	Afu6G10890	Actin cytoskeleton organization protein App1; putative [Source:UniProtKB/TrEMBL
CADAFUAG00001965	761.643	-0.57048	0.331506	-1.72087	0.0852738	0.999997	AFUA_6G09110	Afu6G09110	MFS multidrug transporter; putative [Source:UniProtKB/TrEMBL
CADAFUAG00001966	69.439	0.587881	0.587371	1.00087	0.316891	0.999997	AFUA_6G12550	Afu6G12550	Mitochondrial carrier protein; putative [Source:UniProtKB/TrEMBL
CADAFUAG00001967	331.615	-0.259766	0.360286	-0.721	0.47091	0.999997	AFUA_6G11260	Afu6G11260	Ribosomal protein L26 [Source:UniProtKB/TrEMBL
CADAFUAG00001968	309.644	0.325445	0.366539	0.887885	0.374602	0.999997	AFUA_6G11220	Afu6G11220	TBC domain protein; putative [Source:UniProtKB/TrEMBL
CADAFUAG00001969	43.4353	-0.0139666	0.69718	-0.020033	0.984017	0.999997	AFUA_6G11360	Afu6G11360	ABC transporter; putative [Source:UniProtKB/TrEMBL
CADAFUAG00001970	1265.9	0.0592277	0.330692	0.179102	0.857858	0.999997	AFUA_6G10900	Afu6G10900	UV-endonuclease UVE-1 [Source:UniProtKB/TrEMBL
CADAFUAG00001971	96.3041	0.375084	0.514249	0.729381	0.465769	0.999997	AFUA_6G07680	Afu6G07680	Putative uncharacterized protein [Source:UniProtKB/TrEMBL
CADAFUAG00001972	212.082	-0.163746	0.417398	-0.392302	0.694835	0.999997	AFUA_6G07840	Afu6G07840	Methionine-R-sulfoxide reductase SelR; putative [Source:UniProtKB/TrEMBL
CADAFUAG00001973	7908.92	-0.0816313	0.304727	-0.267883	0.788789	0.999997	AFUA_6G14200	Afu6G14200	Acetyl-CoA-acetyltransferase; putative [Source:UniProtKB/TrEMBL
CADAFUAG00001974	102.85	0.048885	0.495237	0.0987102	0.921368	0.999997	AFUA_6G13250	Afu6G13250	60S ribosomal protein L31e [Source:UniProtKB/TrEMBL
CADAFUAG00001975	271.779	-0.50361	0.376154	-1.33884	0.180623	0.999997	AFUA_6G06850	Afu6G06850	DUF647 domain protein [Source:UniProtKB/TrEMBL
CADAFUAG00001976	275.136	-0.265799	0.3736	-0.711455	0.476802	0.999997	AFUA_6G10410	Afu6G10410	Vacuolar protein sorting protein (VPS11); putative [Source:UniProtKB/TrEMBL
CADAFUAG00001977	5100.71	0.0364124	0.303982	0.119785	0.904654	0.999997	AFUA_6G10990	Afu6G10990	NADPH--cytochrome P450 reductase [Source:UniProtKB/Swiss-Prot
CADAFUAG00001978	43859	-0.465196	0.317711	-1.46421	0.143137	0.999997	AFUA_6G06470	Afu6G06470	Heat shock protein Hsp30-like; putative [Source:UniProtKB/TrEMBL
CADAFUAG00001979	77.8228	0.48535	0.568982	0.853014	0.393651	0.999997	AFUA_6G06430	Afu6G06430	Pre-rRNA-processing protein pno1 [Source:UniProtKB/Swiss-Prot
CADAFUAG00001980	2.98634	1.72729	2.68165	0.644112	0.519503	0.999997	AFUA_6G10170	Afu6G10170	Spherulin 4 family protein [Source:UniProtKB/TrEMBL
CADAFUAG00001981	103.095	0.0257071	0.55565	0.046265	0.963099	0.999997	AFUA_6G10230	Afu6G10230	FAD dependent oxidoreductase superfamily [Source:UniProtKB/TrEMBL
CADAFUAG00001982	774.128	-0.0185029	0.32362	-0.0571749	0.954406	0.999997	AFUA_6G12650	Afu6G12650	Putative uncharacterized protein [Source:UniProtKB/TrEMBL
CADAFUAG00001983	13382.5	-0.320895	0.310461	-1.03361	0.301319	0.999997	AFUA_6G09160	Afu6G09160	Ubiquitin conjugating enzyme Ubc8; putative [Source:UniProtKB/TrEMBL
CADAFUAG00001984	947.447	0.0213212	0.329532	0.0647016	0.948412	0.999997	AFUA_6G08760	Afu6G08760	Proline oxidase PrnD [Source:UniProtKB/TrEMBL
CADAFUAG00001985	667.037	-0.297424	0.325155	-0.914715	0.360342	0.999997	AFUA_6G10000	Afu6G10000	Putative uncharacterized protein [Source:UniProtKB/TrEMBL
CADAFUAG00001986	1971.18	-0.102079	0.295503	-0.345443	0.729762	0.999997	AFUA_6G14060	Afu6G14060	Putative uncharacterized protein [Source:UniProtKB/TrEMBL
CADAFUAG00001987	87.7306	-0.053022	0.522549	-0.101468	0.919179	0.999997	AFUA_6G14420	Afu6G14420	ADAM family of metalloprotease ADM-A [Source:UniProtKB/TrEMBL
CADAFUAG00001988	18.2795	-0.602924	0.996249	-0.605194	0.54505	0.999997	AFUA_6G09910	Afu6G09910	Glutaminase; putative [Source:UniProtKB/TrEMBL
CADAFUAG00001989	331.225	0.141925	0.361124	0.393009	0.694313	0.999997	AFUA_6G12910	Afu6G12910	DsDNA-dependent ATPase Rad54; putative [Source:UniProtKB/TrEMBL
CADAFUAG00001990	15.1006	-0.81966	1.11287	-0.73653	0.461408	0.999997	AFUA_6G07040	Afu6G07040	Autophagy protein 5 [Source:UniProtKB/Swiss-Prot
CADAFUAG00001991	4.68516	-1.5376	1.96504	-0.782479	0.433933	0.999997	AFUA_6G10640	Afu6G10640	Putative uncharacterized protein [Source:UniProtKB/TrEMBL
CADAFUAG00001992	14.3735	-1.28642	1.1197	-1.1489	0.250597	0.999997	AFUA_6G13820	Afu6G13820	Putative uncharacterized protein [Source:UniProtKB/TrEMBL
CADAFUAG00001993	9.0967	-0.358675	1.38599	-0.258786	0.7958	0.999997	AFUA_6G13110	Afu6G13110	Transferase hexapeptide domain protein [Source:UniProtKB/TrEMBL
CADAFUAG00001994	521.054	-0.690815	0.376291	-1.83585	0.0663796	0.999997	AFUA_6G14350	Afu6G14350	C6 transcription factor; putative [Source:UniProtKB/TrEMBL
CADAFUAG00001995	3318.12	-0.24779	0.30394	-0.815258	0.414925	0.999997	AFUA_6G14320	Afu6G14320	Putative uncharacterized protein [Source:UniProtKB/TrEMBL
CADAFUAG00001996	256.435	-0.041665	0.380376	-0.109536	0.912777	0.999997	AFUA_6G13520	Afu6G13520	Tryptophan synthase [Source:UniProtKB/TrEMBL
CADAFUAG00001997	2.51148	1.42602	2.74289	0.519897	0.603135	0.999997	AFUA_6G10780	Afu6G10780	Carboxylesterase; putative [Source:UniProtKB/TrEMBL
CADAFUAG00001998	49669.8	-0.35615	0.318532	-1.1181	0.263524	0.999997	AFUA_6G12220	Afu6G12220	Isochorismatase family hydrolase; putative [Source:UniProtKB/TrEMBL
CADAFUAG00001999	2813.35	-0.160546	0.30594	-0.524763	0.599748	0.999997	AFUA_6G08440	Afu6G08440	Protoporphyrinogen oxidase; putative [Source:UniProtKB/TrEMBL
[truncated: 7,899 more rows]

## Sheet: DEGs
	baseMean	log2FoldChange	lfcSE	stat	pvalue	padj
CADAFUAG00009649	160.853	-3.45733	0.451749	-7.65321	1.96029e-14	5.94426e-11	AFUA_7G04920	Afu7G04920	Putative uncharacterized protein [Source:UniProtKB/TrEMBL
CADAFUAG00002071	143.915	-3.24224	0.502973	-6.44615	1.14731e-10	2.08741e-07	AFUA_6G13680	Afu6G13680	APSES transcription factor Xbp1; putative [Source:UniProtKB/TrEMBL
CADAFUAG00003042	126.874	-2.90092	0.483044	-6.0055	1.9074e-09	2.89194e-06	AFUA_8G06520	Afu8G06520	Peptidyl-arginine deiminase domain protein [Source:UniProtKB/TrEMBL
CADAFUAG00001500	181.616	-2.01605	0.440097	-4.58093	4.62913e-06	0.00323932	AFUA_6G00430	Afu6G00430	IgE-binding protein [Source:UniProtKB/TrEMBL
CADAFUAG00009559	174.64	-1.97876	0.429735	-4.6046	4.1325e-06	0.00313278	AFUA_7G04930	Afu7G04930	Alkaline serine protease (PR1)/allergen F18-like [Source:UniProtKB/TrEMBL
CADAFUAG00005596	2802.53	-1.90134	0.328161	-5.79393	6.87562e-09	8.93536e-06	AFUA_3G14940	Afu3G14940	Elastase inhibitor AFUEI [Source:UniProtKB/Swiss-Prot
CADAFUAG00004687	264.038	-1.8824	0.387791	-4.85417	1.20895e-06	0.00109978	AFUA_2G12070	Afu2G12070	C6 transcription factor; putative [Source:UniProtKB/TrEMBL
CADAFUAG00000850	571.407	-1.48013	0.332194	-4.45562	8.36528e-06	0.00543564	AFUA_8G01330	Afu8G01330	Putative uncharacterized protein [Source:UniProtKB/TrEMBL
CADAFUAG00007803	322.536	-1.39847	0.371469	-3.76469	0.000166755	0.0689533	AFUA_4G13920	Afu4G13920	Probable endopolygalacturonase A [Source:UniProtKB/Swiss-Prot
CADAFUAG00008843	828.36	-1.35281	0.352708	-3.83551	0.000125305	0.056995	AFUA_1G03352	Afu1G03352	Alpha-1;3-glucanase/mutanase; putative [Source:UniProtKB/TrEMBL
CADAFUAG00002638	4808.16	-1.21619	0.333388	-3.64798	0.000264312	0.0993543	AFUA_5G01030	Afu5G01030	Glyceraldehyde-3-phosphate dehydrogenase [Source:UniProtKB/TrEMBL
CADAFUAG00000467	1315.51	-1.2034	0.328619	-3.66198	0.000250275	0.0989893	AFUA_6G02535	Afu6G02535	Putative uncharacterized protein [Source:UniProtKB/TrEMBL
CADAFUAG00002438	2797.43	-1.17311	0.304788	-3.84893	0.000118637	0.0568022	AFUA_4G01350	Afu4G01350	Putative uncharacterized protein [Source:UniProtKB/TrEMBL
CADAFUAG00007567	1007.43	1.14555	0.314744	3.63962	0.000273041	0.0993543	AFUA_1G14430	Afu1G14430	Chitin binding protein; putative [Source:UniProtKB/TrEMBL
CADAFUAG00006264	1549.66	1.28798	0.302648	4.25569	2.08406e-05	0.0118492	AFUA_5G10380	Afu5G10380	Probable pectin lyase A [Source:UniProtKB/Swiss-Prot
CADAFUAG00002851	9456.24	1.37698	0.32325	4.25981	2.04602e-05	0.0118492	AFUA_5G01620	Afu5G01620	Extracellular proline-rich protein [Source:UniProtKB/TrEMBL
CADAFUAG00008542	1190.13	1.38546	0.34278	4.04183	5.30362e-05	0.0283806	AFUA_4G06570	Afu4G06570	Ras guanine-nucleotide exchange protein; putative [Source:UniProtKB/TrEMBL
CADAFUAG00007412	3026.89	1.46691	0.298748	4.91019	9.09902e-07	0.000919709	AFUA_1G13610	Afu1G13610	SH3 domain protein [Source:UniProtKB/TrEMBL
CADAFUAG00005480	64959	1.54932	0.284738	5.4412	5.29216e-08	6.01785e-05	AFUA_3G13110	Afu3G13110	Extracellular serine-threonine rich protein [Source:UniProtKB/TrEMBL
CADAFUAG00002235	824.619	1.56169	0.333409	4.68401	2.81312e-06	0.00232645	AFUA_6G12190	Afu6G12190	Putative uncharacterized protein [Source:UniProtKB/TrEMBL
CADAFUAG00004347	63.6392	2.63909	0.6939	3.80327	0.000142799	0.0618591	AFUA_2G14420	Afu2G14420	Cutinase; putative [Source:UniProtKB/TrEMBL
