# Supplementary material for: The Transcriptome Response to Azole Compounds in Aspergillus fumigatus Shows Differential Gene Expression across Pathways Essential for Azole Resistance and Cell Survival
Source: J Fungi (Basel). 2023 Jul 30;9(8):807. doi: 10.3390/jof9080807 (PMC10455693; doi:10.3390/jof9080807)
Supplement: Supplementary file 1 [file jof-09-00807-s001.zip › Table S4 ¿C List of DEGs found after Venn analysis.xlsx]

## Sheet: Venn output
Names	total	elements
Up 147 Up 162	63	Afu3G13010
		Afu2G01870
		Afu2G12780
		Afu8G01260
		Afu3G09400
		Afu3G11500
		Afu6G07330
		Afu8G02570
		Afu8G02040
		Afu2G04980
		Afu2G00240
		Afu3G00710
		Afu3G01500
		Afu2G01190
		Afu6G07480
		Afu1G17490
		Afu1G14480
		Afu7G04570
		Afu6G11290
		Afu3G01810
		Afu4G07090
		Afu8G01710
		Afu2G15950
		Afu7G04880
		Afu1G01440
		Afu1G17070
		Afu3G11870
		Afu6G09960
		Afu3G01196
		Afu6G14140
		Afu3G10370
		Afu4G12680
		Afu1G06480
		Afu3G01840
		Afu2G15130
		Afu2G00410
		Afu8G02590
		Afu2G09240
		Afu4G13940
		Afu4G03640
		Afu1G12410
		Afu2G04380
		Afu6G07720
		Afu3G01850
		Afu1G14330
		Afu1G13820
		Afu4G04700
		Afu2G16060
		Afu6G08760
		Afu2G15110
		Afu1G17470
		Afu1G14050
		Afu6G07470
		Afu1G12400
		Afu4G03630
		Afu8G05030
		Afu6G03060
		Afu2G15140
		Afu2G08660
		Afu8G02430
		Afu7G04560
		Afu3G01820
		Afu2G11180
Down 162 Up 147	5	Afu5G14740
		Afu5G00750
		Afu6G00430
		Afu7G01930
		Afu1G04430
Down 147 Down 162	62	Afu4G12740
		Afu3G03640
		Afu1G04130
		Afu2G17850
		Afu6G00720
		Afu5G14780
		Afu3G03660
		Afu5G01662
		Afu1G10820
		Afu4G00450
		Afu3G03400
		Afu4G14300
		Afu5G01330
		Afu6G00760
		Afu6G00750
		Afu3G15010
		Afu5G01610
		Afu6G11620
		Afu7G00440
		Afu6G12990
		Afu2G05150
		Afu1G16220
		Afu4G01360
		Afu4G02980
		Afu3G02050
		Afu5G00920
		Afu8G02490
		Afu7G00420
		Afu3G15340
		Afu5G00580
		Afu5G14610
		Afu4G11730
		Afu3G10730
		Afu1G17180
		Afu1G14410
		Afu5G12550
		Afu5G01640
		Afu6G03190
		Afu3G14945
		Afu4G01350
		Afu4G00440
		Afu1G10130
		Afu3G14940
		Afu4G00460
		Afu5G01630
		Afu1G03352
		Afu1G03660
		Afu8G02010
		Afu2G00580
		Afu5G10420
		Afu5G01030
		Afu2G00990
		Afu2G07680
		Afu6G00770
		Afu3G10090
		Afu4G03010
		Afu3G03390
		Afu6G10720
		Afu7G06150
		Afu3G03650
		Afu3G03445
		Afu4G13770
Up 147	537	Afu2G02250
		Afu6G12410
		Afu4G10050
		Afu2G14620
		Afu8G00420
		Afu3G14400
		Afu4G08980
		Afu3G01670
		Afu2G13650
		Afu7G00180
		Afu1G14710
		Afu1G04870
		Afu6G03430
		Afu4G08080
		Afu6G06520
		Afu2G01900
		Afu3G02430
		Afu5G08730
		Afu3G12920
		Afu3G01270
		Afu2G08740
		Afu1G11330
		Afu3G00870
		Afu4G11650
		Afu5G02960
		Afu6G03490
		Afu2G04470
		Afu6G14300
		Afu3G01080
		Afu2G01950
		Afu5G00500
		Afu2G00220
		Afu8G04870
		Afu2G15150
		Afu3G09220
		Afu8G07100
		Afu6G03440
		Afu3G10120
		Afu3G14700
		Afu4G14070
		Afu2G04210
		Afu7G00160
		Afu3G06710
		Afu1G14380
		Afu6G14620
		Afu2G13750
		Afu6G03320
		Afu5G01800
		Afu5G05580
		Afu2G14250
		Afu2G17800
		Afu3G13510
		Afu2G16530
		Afu2G13760
		Afu8G06470
		Afu8G02070
		Afu4G09140
		Afu5G03750
		Afu2G09010
		Afu4G12500
		Afu7G06340
		Afu3G10360
		Afu4G14030
		Afu3G11340
		Afu2G14960
		Afu3G00340
		Afu1G09880
		Afu6G02300
		Afu2G13175
		Afu3G03310
		Afu3G12330
		Afu6G11850
		Afu5G11270
		Afu8G01970
		Afu8G04826
		Afu3G09680
		Afu8G06880
		Afu5G13650
		Afu2G00320
		Afu1G12850
		Afu4G04140
		Afu3G11040
		Afu4G12010
		Afu4G07900
		Afu4G07070
		Afu6G02210
		Afu6G10290
		Afu8G02050
		Afu3G00440
		Afu3G07890
		Afu5G09540
		Afu7G00820
		Afu2G04480
		Afu2G01790
		Afu5G06850
		Afu1G03200
		Afu1G12820
		Afu6G04930
		Afu8G00620
		Afu2G14490
		Afu4G02890
		Afu3G10530
		Afu2G04270
		Afu6G08260
		Afu8G02090
		Afu6G14390
		Afu4G13980
		Afu5G00770
		Afu7G06790
		Afu3G12360
		Afu5G03980
		Afu1G01175
		Afu5G06820
		Afu3G11840
		Afu4G03770
		Afu7G00170
		Afu3G01490
		Afu4G03322
		Afu2G17810
		Afu5G07450
		Afu8G02500
		Afu7G05270
		Afu3G14910
		Afu7G00950
		Afu2G14460
		Afu1G12220
		Afu8G01570
		Afu4G03320
		Afu3G11970
		Afu8G01700
		Afu4G01270
		Afu4G03585
		Afu3G01960
		Afu2G13740
		Afu2G08800
		Afu4G06900
		Afu4G14090
		Afu2G13500
		Afu2G13590
		Afu4G01280
		Afu3G12320
		Afu6G03930
		Afu2G17470
		Afu3G13490
		Afu4G14175
		Afu1G11270
		Afu7G02050
		Afu7G01340
		Afu4G06890
		Afu3G12790
		Afu8G01820
		Afu7G06250
		Afu4G13540
		Afu4G02720
		Afu4G09540
		Afu2G02700
		Afu2G13890
		Afu1G10190
		Afu6G00310
		Afu6G09710
		Afu6G02330
		Afu2G17620
		Afu7G06510
		Afu4G01470
		Afu3G09970
		Afu2G05060
		Afu1G01640
		Afu8G01670
		Afu5G03000
		Afu3G03550
		Afu2G14640
		Afu5G11750
		Afu5G12860
		Afu5G05980
		Afu2G17475
		Afu2G04200
		Afu1G05360
		Afu3G14150
		Afu2G13930
		Afu7G05660
		Afu7G02390
		Afu1G04750
		Afu5G12410
		Afu2G17210
		Afu8G02350
		Afu6G04680
		Afu4G14470
		Afu6G03450
		Afu3G09150
		Afu2G00330
		Afu5G01740
		Afu7G06390
		Afu5G04260
		Afu1G05370
		Afu2G14470
		Afu2G16540
		Afu2G01180
		Afu1G02040
		Afu8G06830
		Afu6G02920
		Afu5G14200
		Afu8G05770
		Afu4G13890
		Afu6G03230
		Afu3G09140
		Afu2G13100
		Afu5G00650
		Afu4G09530
		Afu5G08030
		Afu8G07330
		Afu1G02120
		Afu5G13440
		Afu7G04870
		Afu3G01050
		Afu1G13310
		Afu2G08790
		Afu3G08620
		Afu5G03010
		Afu1G09890
		Afu1G16860
		Afu2G14440
		Afu2G13660
		Afu7G01090
		Afu7G03900
		Afu6G07750
		Afu7G00780
		Afu6G09910
		Afu6G03680
		Afu7G04550
		Afu3G10770
		Afu5G13750
		Afu1G17460
		Afu6G03460
		Afu4G08420
		Afu5G12230
		Afu1G12920
		Afu3G09100
		Afu5G08250
		Afu4G01230
		Afu3G12340
		Afu3G09990
		Afu2G00770
		Afu4G07080
		Afu2G15800
		Afu4G04605
		Afu8G02120
		Afu8G05720
		Afu1G16360
		Afu5G08270
		Afu6G08270
		Afu8G00840
		Afu2G10130
		Afu1G13450
		Afu6G13230
		Afu2G08090
		Afu2G04220
		Afu3G13760
		Afu4G08715
		Afu4G01242
		Afu6G00555
		Afu3G01250
		Afu8G01900
		Afu6G14030
		Afu4G13230
		Afu2G13680
		Afu6G08020
		Afu8G05450
		Afu2G14450
		Afu2G10330
		Afu4G07950
		Afu1G09140
		Afu5G02950
		Afu6G01910
		Afu1G08870
		Afu5G02770
		Afu5G02330
		Afu3G12500
		Afu5G06790
		Afu2G04180
		Afu6G11410
		Afu4G09110
		Afu2G17580
		Afu5G04050
		Afu8G05710
		Afu6G13350
		Afu6G12540
		Afu5G06930
		Afu8G01920
		Afu1G07750
		Afu3G01690
		Afu2G14630
		Afu1G14340
		Afu5G01920
		Afu2G09510
		Afu3G12960
		Afu1G17080
		Afu4G06620
		Afu4G10770
		Afu5G01300
		Afu2G06010
		Afu5G06970
		Afu5G05960
		Afu3G14670
		Afu1G06130
		Afu4G03360
		Afu2G02990
		Afu2G17400
		Afu1G16920
		Afu4G12980
		Afu5G02320
		Afu2G04190
		Afu1G06670
		Afu6G11890
		Afu3G09110
		Afu3G08550
		Afu6G13540
		Afu3G00170
		Afu2G13640
		Afu8G02640
		Afu3G07860
		Afu6G10300
		Afu1G10460
		Afu2G04870
		Afu4G14650
		Afu3G10680
		Afu2G03830
		Afu3G08710
		Afu8G00440
		Afu1G14980
		Afu2G12680
		Afu5G06980
		Afu4G13090
		Afu5G07320
		Afu1G16350
		Afu4G12530
		Afu4G03450
		Afu5G06800
		Afu2G01300
		Afu1G05720
		Afu4G04120
		Afu1G00420
		Afu4G01260
		Afu4G01290
		Afu1G06500
		Afu1G01630
		Afu7G01790
		Afu1G16870
		Afu6G02790
		Afu3G10540
		Afu1G09130
		Afu1G12420
		Afu1G04390
		Afu2G12740
		Afu8G02170
		Afu7G04700
		Afu2G04110
		Afu1G16590
		Afu3G10760
		Afu2G03510
		Afu6G14060
		Afu3G00540
		Afu4G00330
		Afu2G08750
		Afu6G02020
		Afu2G13830
		Afu3G10600
		Afu7G04900
		Afu4G01120
		Afu6G07610
		Afu5G01230
		Afu2G03450
		Afu2G03480
		Afu4G00280
		Afu2G01405
		Afu2G13170
		Afu3G07570
		Afu3G10820
		Afu5G07210
		Afu7G03660
		Afu3G00320
		Afu6G11170
		Afu4G00980
		Afu7G03880
		Afu4G14080
		Afu6G12710
		Afu5G10510
		Afu8G04120
		Afu2G16520
		Afu3G01280
		Afu2G13230
		Afu5G00540
		Afu1G14840
		Afu8G02060
		Afu5G08650
		Afu6G07970
		Afu4G13990
		Afu3G09980
		Afu4G12000
		Afu5G03710
		Afu6G10280
		Afu1G10880
		Afu5G06810
		Afu8G06810
		Afu1G01450
		Afu8G04390
		Afu2G03070
		Afu5G06110
		Afu1G01920
		Afu8G05660
		Afu1G12500
		Afu1G13240
		Afu6G03090
		Afu2G04590
		Afu3G13810
		Afu4G09560
		Afu6G14090
		Afu4G09710
		Afu4G03470
		Afu1G06680
		Afu3G04060
		Afu7G01970
		Afu6G01900
		Afu6G08155
		Afu3G14680
		Afu2G04262
		Afu5G14800
		Afu6G07590
		Afu4G09580
		Afu2G11420
		Afu5G12325
		Afu4G08720
		Afu5G08740
		Afu1G02190
		Afu5G02655
		Afu4G09330
		Afu3G00570
		Afu1G13440
		Afu3G08625
		Afu8G06070
		Afu2G17930
		Afu7G06620
		Afu6G12650
		Afu2G08290
		Afu6G07140
		Afu2G12470
		Afu5G05950
		Afu5G00710
		Afu1G02290
		Afu2G10540
		Afu4G09640
		Afu6G01905
		Afu2G12070
		Afu3G09130
		Afu3G06720
		Afu6G03480
		Afu2G17140
		Afu5G14410
		Afu1G01700
		Afu1G09900
		Afu4G04745
		Afu3G06280
		Afu4G13872
		Afu8G02100
		Afu2G01200
		Afu1G11350
		Afu4G14480
		Afu5G12840
		Afu4G03540
		Afu4G04318
		Afu6G07780
		Afu1G15430
		Afu6G11480
		Afu5G10570
		Afu3G08560
		Afu1G05260
		Afu7G01420
		Afu2G02010
		Afu1G12475
		Afu6G08130
		Afu2G01400
		Afu5G02650
		Afu7G01410
		Afu6G08750
		Afu3G10840
		Afu6G08840
		Afu3G13440
		Afu3G02090
		Afu2G10920
		Afu3G12150
		Afu2G14610
		Afu5G07730
		Afu1G16580
		Afu1G16556
		Afu5G08230
		Afu5G00730
		Afu1G13270
		Afu1G06140
		Afu3G03470
		Afu2G02620
		Afu6G07260
		Afu7G04540
		Afu4G03100
		Afu4G14640
		Afu2G14760
		Afu3G12910
		Afu2G15165
		Afu8G00410
		Afu5G01820
		Afu2G13050
		Afu4G09240
		Afu6G08860
		Afu7G06523
		Afu7G04170
		Afu7G01960
		Afu6G09580
		Afu3G03540
		Afu5G13730
		Afu2G16490
		Afu6G04690
		Afu6G00220
		Afu5G06660
		Afu1G12040
		Afu4G03340
		Afu5G01840
		Afu6G04300
		Afu2G13300
		Afu7G03800
		Afu3G00930
		Afu2G07630
		Afu7G05310
		Afu5G11880
		Afu3G02940
		Afu6G05190
		Afu8G00480
		Afu5G13070
		Afu3G07900
		Afu3G14730
Down 147	458	Afu1G15360
		Afu2G03060
		Afu4G13580
		Afu1G15470
		Afu6G03520
		Afu6G02530
		Afu8G05910
		Afu4G03880
		Afu1G10630
		Afu2G15930
		Afu3G14270
		Afu4G01560
		Afu1G05990
		Afu6G00290
		Afu1G03390
		Afu2G04080
		Afu6G10740
		Afu5G07000
		Afu2G05980
		Afu1G15550
		Afu3G04040
		Afu3G04030
		Afu1G07040
		Afu6G03690
		Afu3G08870
		Afu2G14420
		Afu4G14560
		Afu1G11160
		Afu3G00370
		Afu2G07970
		Afu1G16980
		Afu5G07130
		Afu6G02950
		Afu1G17170
		Afu6G05200
		Afu8G01660
		Afu6G03600
		Afu3G04260
		Afu5G06390
		Afu3G11010
		Afu4G08310
		Afu6G11120
		Afu1G05020
		Afu3G01100
		Afu5G03020
		Afu3G14110
		Afu4G07435
		Afu1G16810
		Afu2G12880
		Afu2G11020
		Afu7G04500
		Afu1G04530
		Afu8G02860
		Afu6G08720
		Afu1G02770
		Afu2G03680
		Afu1G10510
		Afu4G13960
		Afu6G11660
		Afu6G03660
		Afu1G14930
		Afu6G03350
		Afu2G17060
		Afu4G08580
		Afu1G03780
		Afu3G07155
		Afu7G04730
		Afu2G13430
		Afu7G05500
		Afu6G07700
		Afu7G05460
		Afu2G05380
		Afu1G15350
		Afu3G07160
		Afu2G15040
		Afu4G07190
		Afu8G00280
		Afu1G12070
		Afu8G01800
		Afu6G12240
		Afu7G05560
		Afu1G05080
		Afu8G05070
		Afu2G03670
		Afu2G00460
		Afu3G07410
		Afu6G08320
		Afu2G10855
		Afu1G06330
		Afu3G06760
		Afu1G06150
		Afu1G06640
		Afu3G00380
		Afu2G12280
		Afu4G06540
		Afu4G10630
		Afu5G03560
		Afu1G13930
		Afu1G06880
		Afu2G10070
		Afu2G15770
		Afu5G01190
		Afu7G00380
		Afu7G02400
		Afu4G03760
		Afu4G04180
		Afu3G03710
		Afu6G11100
		Afu3G06970
		Afu3G08270
		Afu3G14560
		Afu5G07310
		Afu3G13140
		Afu6G03560
		Afu1G09100
		Afu3G03670
		Afu2G09580
		Afu3G09650
		Afu1G05500
		Afu2G03590
		Afu4G10620
		Afu8G00830
		Afu7G06440
		Afu4G00720
		Afu5G14490
		Afu3G03440
		Afu2G11060
		Afu3G07120
		Afu2G08320
		Afu6G07820
		Afu2G17360
		Afu1G02570
		Afu5G06610
		Afu3G06530
		Afu3G07960
		Afu6G12320
		Afu1G13940
		Afu2G13630
		Afu3G01240
		Afu4G07990
		Afu6G01840
		Afu4G09360
		Afu1G06960
		Afu2G10090
		Afu4G03890
		Afu2G01480
		Afu6G11070
		Afu8G00650
		Afu7G04070
		Afu1G05300
		Afu3G07000
		Afu8G01770
		Afu4G12600
		Afu2G15290
		Afu6G08360
		Afu6G11700
		Afu2G07550
		Afu5G12620
		Afu3G14600
		Afu1G11710
		Afu1G06340
		Afu2G05990
		Afu4G09970
		Afu3G11290
		Afu3G14090
		Afu5G02920
		Afu2G09790
		Afu2G11450
		Afu3G02670
		Afu5G13120
		Afu4G06920
		Afu6G13250
		Afu3G11580
		Afu4G08240
		Afu7G02470
		Afu2G03040
		Afu6G00660
		Afu4G11900
		Afu3G01340
		Afu1G17350
		Afu1G13500
		Afu6G00730
		Afu2G10440
		Afu1G05630
		Afu7G02140
		Afu8G01870
		Afu8G05330
		Afu2G11460
		Afu3G09320
		Afu5G05820
		Afu7G02190
		Afu2G01040
		Afu7G04490
		Afu4G14590
		Afu6G02610
		Afu1G14580
		Afu2G01610
		Afu6G12630
		Afu3G05440
		Afu2G08130
		Afu6G08430
		Afu2G13460
		Afu3G10800
		Afu4G13170
		Afu2G11380
		Afu3G05600
		Afu5G10430
		Afu2G16310
		Afu5G02860
		Afu3G06540
		Afu2G05085
		Afu8G01290
		Afu4G00960
		Afu3G13620
		Afu1G10240
		Afu8G01420
		Afu6G07390
		Afu3G06120
		Afu5G05450
		Afu1G07530
		Afu2G05450
		Afu8G01750
		Afu8G06080
		Afu2G10280
		Afu3G11260
		Afu5G09910
		Afu1G09440
		Afu7G05230
		Afu1G04320
		Afu5G03210
		Afu1G02630
		Afu3G01350
		Afu5G01430
		Afu2G03780
		Afu6G02040
		Afu5G11190
		Afu7G02100
		Afu1G10980
		Afu2G15590
		Afu6G03990
		Afu4G07540
		Afu3G05570
		Afu3G11060
		Afu5G02470
		Afu5G07300
		Afu3G13840
		Afu4G10810
		Afu3G13220
		Afu3G02800
		Afu3G01610
		Afu3G01290
		Afu7G00700
		Afu6G04730
		Afu4G12650
		Afu2G10300
		Afu2G05910
		Afu3G13320
		Afu5G01250
		Afu1G16210
		Afu6G00510
		Afu5G01620
		Afu1G11960
		Afu4G09190
		Afu2G15340
		Afu2G00750
		Afu1G02580
		Afu6G09305
		Afu5G08480
		Afu6G14442
		Afu7G06270
		Afu1G01190
		Afu4G08060
		Afu8G06050
		Afu3G15250
		Afu7G05220
		Afu5G10690
		Afu3G03420
		Afu5G00940
		Afu6G01940
		Afu3G08460
		Afu6G13380
		Afu2G11850
		Afu5G09240
		Afu4G13780
		Afu5G09890
		Afu8G05380
		Afu5G01970
		Afu4G08260
		Afu6G13320
		Afu3G02080
		Afu4G06570
		Afu5G11130
		Afu1G15960
		Afu8G04400
		Afu6G14330
		Afu2G05920
		Afu1G12170
		Afu2G06080
		Afu6G12660
		Afu3G14020
		Afu6G03540
		Afu2G15280
		Afu1G15540
		Afu1G03110
		Afu1G00450
		Afu1G11130
		Afu2G11300
		Afu6G09520
		Afu2G05560
		Afu1G10270
		Afu2G10100
		Afu1G06940
		Afu2G13980
		Afu2G07380
		Afu8G01850
		Afu2G00570
		Afu7G05290
		Afu6G02760
		Afu5G09350
		Afu4G07710
		Afu5G07330
		Afu5G06360
		Afu3G11440
		Afu8G00680
		Afu5G05500
		Afu1G01760
		Afu2G00550
		Afu6G01930
		Afu4G10860
		Afu1G03690
		Afu5G04000
		Afu8G06760
		Afu5G13940
		Afu5G10070
		Afu2G01590
		Afu7G05400
		Afu6G06770
		Afu1G05150
		Afu4G10800
		Afu4G13570
		Afu7G05490
		Afu2G12550
		Afu4G02960
		Afu3G06820
		Afu6G02440
		Afu3G03430
		Afu4G00940
		Afu3G03680
		Afu3G08470
		Afu2G02580
		Afu2G08890
		Afu3G11690
		Afu8G00600
		Afu6G07080
		Afu8G01390
		Afu6G12230
		Afu5G00930
		Afu4G11820
		Afu1G16730
		Afu3G07710
		Afu3G12300
		Afu6G05280
		Afu3G03010
		Afu3G06960
		Afu1G12590
		Afu1G15730
		Afu5G03490
		Afu6G00650
		Afu8G02760
		Afu2G01720
		Afu4G06580
		Afu2G05120
		Afu4G09040
		Afu7G06060
		Afu4G01570
		Afu1G10230
		Afu6G12080
		Afu6G00740
		Afu5G01680
		Afu6G10580
		Afu1G01780
		Afu5G13450
		Afu1G14120
		Afu1G13900
		Afu2G10500
		Afu2G16380
		Afu1G15020
		Afu2G02750
		Afu6G03750
		Afu5G14830
		Afu3G15050
		Afu2G04130
		Afu6G04920
		Afu2G15180
		Afu6G10750
		Afu6G02230
		Afu2G01350
		Afu1G10620
		Afu8G04340
		Afu2G00940
		Afu5G12610
		Afu7G01040
		Afu2G11940
		Afu5G00590
		Afu5G04336
		Afu2G02150
		Afu2G03930
		Afu1G17150
		Afu4G00490
		Afu2G02490
		Afu6G14370
		Afu4G12710
		Afu2G04330
		Afu2G05290
		Afu4G08810
		Afu5G10380
		Afu6G08050
		Afu1G09450
		Afu5G03330
		Afu8G07130
		Afu2G09720
		Afu5G02700
		Afu5G10060
		Afu6G09310
		Afu3G14030
		Afu1G14090
		Afu1G15520
		Afu5G08600
		Afu3G12255
		Afu6G03980
		Afu8G05430
		Afu1G12890
		Afu4G09440
		Afu2G03380
		Afu8G01340
		Afu7G00805
		Afu1G03770
		Afu3G06840
		Afu1G16440
		Afu8G04290
		Afu1G04660
		Afu2G16370
		Afu4G07360
		Afu7G01460
		Afu4G14580
		Afu1G12690
		Afu4G09660
		Afu1G02610
		Afu8G04100
		Afu2G16440
		Afu5G06710
		Afu4G03000
		Afu4G07690
		Afu2G00970
		Afu2G09700
		Afu3G09290
		Afu1G02330
		Afu3G00130
Up 162	53	Afu4G04530
		Afu2G16780
		Afu2G12830
		Afu6G04830
		Afu5G07960
		Afu2G01290
		Afu2G13370
		Afu3G14130
		Afu3G11280
		Afu5G06090
		Afu3G01410
		Afu1G03800
		Afu2G12820
		Afu4G03800
		Afu2G09250
		Afu6G13280
		Afu3G12140
		Afu1G06100
		Afu4G12880
		Afu8G06640
		Afu5G03600
		Afu1G05670
		Afu5G06070
		Afu2G04570
		Afu8G04470
		Afu3G11880
		Afu2G04440
		Afu2G01120
		Afu4G05860
		Afu3G13000
		Afu2G12000
		Afu1G13510
		Afu3G14620
		Afu6G09090
		Afu8G00610
		Afu8G06700
		Afu6G10840
		Afu3G01790
		Afu2G00230
		Afu5G07640
		Afu2G11580
		Afu2G06070
		Afu4G11960
		Afu4G06760
		Afu3G07690
		Afu4G12260
		Afu6G11740
		Afu4G01440
		Afu5G07970
		Afu1G13880
		Afu5G01750
		Afu3G00690
		Afu4G01400
Down 162	76	Afu5G10960
		Afu6G00440
		Afu5G03030
		Afu2G17900
		Afu5G14860
		Afu7G05410
		Afu2G15430
		Afu7G06290
		Afu5G00330
		Afu2G00500
		Afu4G03530
		Afu4G09400
		Afu3G03590
		Afu8G04550
		Afu6G00560
		Afu5G07690
		Afu6G01870
		Afu1G09300
		Afu8G01370
		Afu6G00412
		Afu5G00380
		Afu2G00210
		Afu2G11090
		Afu6G13990
		Afu7G05300
		Afu7G05240
		Afu4G04460
		Afu8G01780
		Afu7G04920
		Afu1G10380
		Afu1G10390
		Afu4G08380
		Afu4G14350
		Afu8G06100
		Afu5G11250
		Afu4G03020
		Afu7G06130
		Afu5G00700
		Afu6G00690
		Afu4G03722
		Afu4G06670
		Afu3G14665
		Afu8G06870
		Afu3G03410
		Afu4G13050
		Afu4G13360
		Afu1G16670
		Afu8G01330
		Afu2G13030
		Afu5G01990
		Afu3G03060
		Afu2G15850
		Afu2G17530
		Afu2G11880
		Afu5G08800
		Afu7G04930
		Afu5G10980
		Afu7G06350
		Afu3G03970
		Afu3G00730
		Afu3G00810
		Afu1G15180
		Afu5G03780
		Afu3G14950
		Afu3G03500
		Afu5G11245
		Afu6G03140
		Afu4G09700
		Afu2G09810
		Afu5G01650
		Afu1G05550
		Afu2G11010
		Afu8G06090
		Afu5G00630
		Afu5G01000
		Afu5G00720

## Sheet: Descr of the 63 UP
Gene ID sour		ce_id Organ	ism Genomic Location (Gen	e) Product Description Gene Type Input	ID
Afu1g01440	Up	Afu1g01440-T	Aspergillus fumigatus Af293	Chr1_A_fumigatus_Af293:465,834..466,069(+)	Ortholog of Aspergillus fumigatus A1163 : AFUB_079340 protein coding gene Afua_1G01440
Afu1g06480	Up	Afu1g06480-T	Aspergillus fumigatus Af293	Chr1_A_fumigatus_Af293:1,860,381..1,862,201(+)	Predicted adhesin-like protein protein coding gene Afua_1G06480
Afu1g12400	Up	Afu1g12400-T	Aspergillus fumigatus Af293	Chr1_A_fumigatus_Af293:3,272,383..3,274,443(+)	Has domain(s) with predicted arylformamidase activity and role in tryptophan catabolic process to kynurenine protein coding gene Afua_1G12400
Afu1g12410	Up	Afu1g12410-T	Aspergillus fumigatus Af293	Chr1_A_fumigatus_Af293:3,275,093..3,276,966(+)	Has domain(s) with predicted FAD binding, oxidoreductase activity and role in metabolic process protein coding gene Afua_1G12410
Afu1g13820	Up	Afu1g13820-T	Aspergillus fumigatus Af293	Chr1_A_fumigatus_Af293:3,689,012..3,690,635(+)	Ortholog of Aspergillus glaucus : Aspgl1_0038114, Neosartorya fischeri NRRL 181 : NFIA_011700 and Aspergillus fumigatus A1163 : AFUB_013300 protein coding gene Afua_1G13820
Afu1g14050	Up	Afu1g14050-T	Aspergillus fumigatus Af293	Chr1_A_fumigatus_Af293:3,754,257..3,754,733(-)	Putative F-box protein protein coding gene Afua_1G14050
Afu1g14330	Up	Afu1g14330-T	Aspergillus fumigatus Af293	Chr1_A_fumigatus_Af293:3,832,067..3,836,990(+)	Azole transporter protein coding gene Afua_1G14330
Afu1g14480	Up	Afu1g14480-T	Aspergillus fumigatus Af293	Chr1_A_fumigatus_Af293:3,867,597..3,868,503(+)	Ortholog of Aspergillus fumigatus A1163 : AFUB_014010 protein coding gene Afua_1G14480
Afu1g17070	Up	Afu1g17070-T	Aspergillus fumigatus Af293	Chr1_A_fumigatus_Af293:4,660,827..4,663,781(+)	Ortholog(s) have fungal-type vacuole localization protein coding gene Afua_1G17070
Afu1g17470	Up	Afu1g17470-T	Aspergillus fumigatus Af293	Chr1_A_fumigatus_Af293:4,782,071..4,783,995(+)	Putative high-affinity nitrate transporter protein coding gene Afua_1G17470
Afu1g17490	Up	Afu1g17490-T	Aspergillus fumigatus Af293	Chr1_A_fumigatus_Af293:4,785,965..4,788,387(+)	Has domain(s) with predicted carbohydrate binding, carbon-oxygen lyase activity and role in amino sugar catabolic process, carbohydrate metabolic process protein coding gene	Afua_1	G17490
Afu2g00240	Up	Afu2g00240-T	Aspergillus fumigatus Af293	Chr2_A_fumigatus_Af293:49,434..50,495(+)	Has domain(s) with predicted catalytic activity, role in RNA metabolic process and intracellular localization protein coding gene Afua_2G00240
Afu2g00410	Up	Afu2g00410-T	Aspergillus fumigatus Af293	Chr2_A_fumigatus_Af293:83,465..87,164(-)	Has domain(s) with predicted carbon-nitrogen ligase activity, with glutamine as amido-N-donor activity protein coding gene Afua_2G00410
Afu2g01190	Up	Afu2g01190-T	Aspergillus fumigatus Af293	Chr2_A_fumigatus_Af293:278,074..280,148(-)	Has domain(s) with predicted DNA binding, copper ion binding, transcription factor activity, sequence-specific DNA binding activity, role in regulation of transcription, DNA-templated	and nu	cleus loc	alizati	on	protei	n coding gene Afua_2G01190
Afu2g01870	Up	Afu2g01870-T	Aspergillus fumigatus Af293	Chr2_A_fumigatus_Af293:465,553..469,561(-)	Putative class I chitin synthase protein coding gene Afua_2G01870
Afu2g04380	Up	Afu2g04380-T	Aspergillus fumigatus Af293	Chr2_A_fumigatus_Af293:1,203,723..1,205,164(+)	Ortholog of A. nidulans FGSC A4 : AN3975, AN9193/llmJ, AN2891 and A. fumigatus Af293 : Afu1g10150, Afu3g15150, Afu3g15280, Afu6g03300 protein coding gene Afua_2G04380
Afu2g04980	Up	Afu2g04980-T	Aspergillus fumigatus Af293	Chr2_A_fumigatus_Af293:1,369,359..1,370,879(-)	Putative tyrosine decarboxylase protein coding gene Afua_2G04980
Afu2g08660	Up	Afu2g08660-T	Aspergillus fumigatus Af293	Chr2_A_fumigatus_Af293:2,222,532..2,227,083(+)	Ortholog(s) have role in cation homeostasis protein coding gene Afua_2G08660
Afu2g09240	Up	Afu2g09240-T	Aspergillus fumigatus Af293	Chr2_A_fumigatus_Af293:2,367,194..2,369,329(-)	Ortholog(s) have role in SCF-dependent proteasomal ubiquitin-dependent protein catabolic process, cellular response to methylmercury and SCF ubiquitin ligase complex, cytosol localiza	tion	protein	coding	gene	Afua_2	G09240
Afu2g11180	Up	Afu2g11180-T	Aspergillus fumigatus Af293	Chr2_A_fumigatus_Af293:2,871,720..2,874,290(+)	Developmental regulator protein coding gene Afua_2G11180
Afu2g12780	Up	Afu2g12780-T	Aspergillus fumigatus Af293	Chr2_A_fumigatus_Af293:3,276,162..3,279,122(-)	Ortholog of A. nidulans FGSC A4 : AN5364, A. fumigatus Af293 : Afu4g01160, Neosartorya fischeri NRRL 181 : NFIA_044160, NFIA_087930 and Aspergillus wentii : Aspwe1_0097047 protein	coding	gene	Afua_2	G12780
Afu2g15110	Up	Afu2g15110-T	Aspergillus fumigatus Af293	Chr2_A_fumigatus_Af293:3,993,704..3,995,092(-)	Ortholog of A. nidulans FGSC A4 : AN7580, A. niger CBS 513.88 : An15g02960, A. oryzae RIB40 : AO090012000329, Aspergillus wentii : Aspwe1_0044605 and Aspergillus sydowii : Aspsy1_0046	14	protein	coding	gene	Afua_2	G15110
Afu2g15130	Up	Afu2g15130-T	Aspergillus fumigatus Af293	Chr2_A_fumigatus_Af293:3,996,596..4,002,662(-)	Ortholog(s) have ATP binding, drug binding, drug transmembrane transporter activity, fluconazole transporter activity, phospholipid-translocating ATPase activity protein coding	gene	Afua_2G	15130
Afu2g15140	Up	Afu2g15140-T	Aspergillus fumigatus Af293	Chr2_A_fumigatus_Af293:4,003,477..4,006,322(+)	Putative MSF drug transporter protein coding gene Afua_2G15140
Afu2g15950	Up	Afu2g15950-T	Aspergillus fumigatus Af293	Chr2_A_fumigatus_Af293:4,217,104..4,219,539(-)	Putative extracellular aspartic endopeptidase protein coding gene Afua_2G15950
Afu2g16060	Up	Afu2g16060-T	Aspergillus fumigatus Af293	Chr2_A_fumigatus_Af293:4,250,286..4,253,144(+)	Ortholog of A. nidulans FGSC A4 : AN2145, A. fumigatus Af293 : Afu4g14200, A. niger CBS 513.88 : An13g01980, An15g06410, An02g04730 and A. oryzae RIB40 : AO090026000400, AO09001200102	9	protein	coding	gene	Afua_2	G16060
Afu3g00710	Up	Afu3g00710-T	Aspergillus fumigatus Af293	Chr3_A_fumigatus_Af293:159,672..161,546(+)	Ortholog(s) have extracellular region localization protein coding gene Afua_3G00710
Afu3g01196	Up	Afu3g01196-T	Aspergillus fumigatus Af293	Chr3_A_fumigatus_Af293:292,379..293,333(-)	Ortholog of A. nidulans FGSC A4 : AN11281, Aspergillus wentii : Aspwe1_0041157, Aspergillus clavatus NRRL 1 : ACLA_063740, Aspergillus zonatus : Aspzo1_0069971 and Aspergillus sydowii	: Asps	y1_028128	2	protein	coding	gene Afua_3G01196
Afu3g01500	Up	Afu3g01500-T	Aspergillus fumigatus Af293	Chr3_A_fumigatus_Af293:380,977..382,195(+)	Ortholog of Aspergillus fumigatus A1163 : AFUB_046900 protein coding gene Afua_3G01500
Afu3g01810	Up	Afu3g01810-T	Aspergillus fumigatus Af293	Chr3_A_fumigatus_Af293:447,466..448,887(-)	Ortholog of A. nidulans FGSC A4 : AN7086, A. niger CBS 513.88 : An12g02960, An11g03400, Aspergillus wentii : Aspwe1_0122152 and Aspergillus clavatus NRRL 1 : ACLA_006850 protein	coding	gene	Afua_3	G01810
Afu3g01820	Up	Afu3g01820-T	Aspergillus fumigatus Af293	Chr3_A_fumigatus_Af293:449,749..450,915(-)	Ortholog of Aspergillus fumigatus A1163 : AFUB_046590 protein coding gene Afua_3G01820
Afu3g01840	Up	Afu3g01840-T	Aspergillus fumigatus Af293	Chr3_A_fumigatus_Af293:451,843..453,443(+)	Has domain(s) with predicted role in transmembrane transport and integral component of membrane localization protein coding gene Afua_3G01840
Afu3g01850	Up	Afu3g01850-T	Aspergillus fumigatus Af293	Chr3_A_fumigatus_Af293:453,676..454,857(+)	Has domain(s) with predicted protein-arginine deiminase activity and role in putrescine biosynthetic process protein coding gene Afua_3G01850
Afu3g09400	Up	Afu3g09400-T	Aspergillus fumigatus Af293	Chr3_A_fumigatus_Af293:2,380,210..2,381,644(-)	Has domain(s) with predicted role in transmembrane transport and integral component of membrane localization protein coding gene Afua_3G09400
Afu3g10370	Up	Afu3g10370-T	Aspergillus fumigatus Af293	Chr3_A_fumigatus_Af293:2,688,543..2,691,049(-)	protein of unknown function protein coding gene Afua_3G10370
Afu3g11500	Up	Afu3g11500-T	Aspergillus fumigatus Af293	Chr3_A_fumigatus_Af293:3,016,426..3,021,935(-)	Has domain(s) with predicted ADP binding activity protein coding gene Afua_3G11500
Afu3g11870	Up	Afu3g11870-T	Aspergillus fumigatus Af293	Chr3_A_fumigatus_Af293:3,124,561..3,126,959(-)	Ortholog of A. nidulans FGSC A4 : AN2861, A. niger CBS 513.88 : An02g07700, A. oryzae RIB40 : AO090003000750, Aspergillus wentii : Aspwe1_0105255 and Aspergillus sydowii : Aspsy1_0042	742	protein	coding	gene	Afua_3	G11870
Afu3g13010	Up	Afu3g13010-T	Aspergillus fumigatus Af293	Chr3_A_fumigatus_Af293:3,455,785..3,457,934(+)	Has domain(s) with predicted hydrolase activity protein coding gene Afua_3G13010
Afu4g03630	Up	Afu4g03630-T	Aspergillus fumigatus Af293	Chr4_A_fumigatus_Af293:1,024,118..1,026,182(-)	Putative sterol 24-C-methyltransferase with a predicted role in ergosterol biosynthesis protein coding gene Afua_4G03630
Afu4g03640	Up	Afu4g03640-T	Aspergillus fumigatus Af293	Chr4_A_fumigatus_Af293:1,026,475..1,028,065(+)	Ortholog(s) have Prp19 complex, spliceosomal complex localization protein coding gene Afua_4G03640
Afu4g04700	Up	Afu4g04700-T	Aspergillus fumigatus Af293	Chr4_A_fumigatus_Af293:1,322,796..1,323,632(-)	Ortholog of Aspergillus fumigatus A1163 : AFUB_098300 protein coding gene Afua_4G04700
Afu4g07090	Up	Afu4g07090-T	Aspergillus fumigatus Af293	Chr4_A_fumigatus_Af293:1,841,830..1,845,671(+)	Ortholog of A. nidulans FGSC A4 : AN4418, A. niger CBS 513.88 : An04g01500, A. oryzae RIB40 : AO090023000866, Aspergillus wentii : Aspwe1_0167180 and Aspergillus sydowii : Aspsy1_0163	356	protein	coding	gene	Afua_4	G07090
Afu4g12680	Up	Afu4g12680-T	Aspergillus fumigatus Af293	Chr4_A_fumigatus_Af293:3,323,678..3,328,344(-)	Ortholog(s) have ATPase activity, G-quadruplex DNA binding, adenylate kinase activity, double-stranded telomeric DNA binding, single-stranded telomeric DNA binding activity protein	coding	gene	Afua_4	G12680
Afu4g13940	Up	Afu4g13940-T	Aspergillus fumigatus Af293	Chr4_A_fumigatus_Af293:3,637,494..3,641,144(+)	Has domain(s) with predicted NAD+ ADP-ribosyltransferase activity, acid-amino acid ligase activity protein coding gene Afua_4G13940
Afu6g03060	Up	Afu6g03060-T	Aspergillus fumigatus Af293	Chr6_A_fumigatus_Af293:643,251..645,407(+)	Putative major facilitator superfamily (MFS) monosaccharide transporter protein coding gene Afua_6G03060
Afu6g07330	Up	Afu6g07330-T	Aspergillus fumigatus Af293	Chr6_A_fumigatus_Af293:1,651,312..1,652,833(-)	Putative type I methionine aminopeptidase protein coding gene Afua_6G07330
Afu6g07470	Up	Afu6g07470-T	Aspergillus fumigatus Af293	Chr6_A_fumigatus_Af293:1,693,740..1,695,855(-)	Ortholog(s) have role in fungal-type cell wall organization, protein oligomerization and Golgi apparatus, cell cortex of cell tip, cell division site, cellular bud, membrane raft, pla	sma mem	brane loc	alizati	on	protei	n coding gene Afua_6G07470
Afu6g07480	Up	Afu6g07480-T	Aspergillus fumigatus Af293	Chr6_A_fumigatus_Af293:1,696,301..1,697,694(-)	Ortholog(s) have cellulase activity and role in xyloglucan catabolic process protein coding gene Afua_6G07480
Afu6g07720	Up	Afu6g07720-T	Aspergillus fumigatus Af293	Chr6_A_fumigatus_Af293:1,754,652..1,758,472(-)	Putative phosphoenolpyruvate carboxykinase protein coding gene Afua_6G07720
Afu6g08760	Up	Afu6g08760-T	Aspergillus fumigatus Af293	Chr6_A_fumigatus_Af293:2,076,082..2,077,586(+)	Ortholog(s) have mitochondrion localization protein coding gene Afua_6G08760
Afu6g09960	Up	Afu6g09960-T	Aspergillus fumigatus Af293	Chr6_A_fumigatus_Af293:2,450,775..2,452,056(+)	Ortholog of A. nidulans FGSC A4 : AN9194/cetL, A. fumigatus Af293 : Afu6g07190, A. niger CBS 513.88 : An12g05250, A. oryzae RIB40 : AO090005000004 and Aspergillus wentii : Aspwe1_0033	326, As	pwe1_0054	891	protein	coding	gene Afua_6G09960
Afu6g11290	Up	Afu6g11290-T	Aspergillus fumigatus Af293	Chr6_A_fumigatus_Af293:2,791,686..2,794,522(-)	Ortholog of A. nidulans FGSC A4 : AN0572, A. niger CBS 513.88 : An08g07465, Aspergillus wentii : Aspwe1_0027109 and Aspergillus sydowii : Aspsy1_0086207 protein coding gene	Afua_6	G11290
Afu6g14140	Up	Afu6g14140-T	Aspergillus fumigatus Af293	Chr6_A_fumigatus_Af293:3,600,661..3,602,558(-)	Has domain(s) with predicted role in response to stress and integral component of membrane localization protein coding gene Afua_6G14140
Afu7g04560	Up	Afu7g04560-T	Aspergillus fumigatus Af293	Chr7_A_fumigatus_Af293:1,038,497..1,039,028(+)	Ortholog of Aspergillus fumigatus A1163 : AFUB_090100 protein coding gene Afua_7G04560
Afu7g04570	Up	Afu7g04570-T	Aspergillus fumigatus Af293	Chr7_A_fumigatus_Af293:1,039,096..1,042,413(+)	Putative Na/K ATPase alpha 1 subunit protein coding gene Afua_7G04570
Afu7g04880	Up	Afu7g04880-T	Aspergillus fumigatus Af293	Chr7_A_fumigatus_Af293:1,145,491..1,148,043(+)	Has domain(s) with predicted transferase activity, transferring hexosyl groups activity and role in lipid glycosylation, metabolic process protein coding gene Afua_7G04880
Afu8g01260	Up	Afu8g01260-T	Aspergillus fumigatus Af293	Chr8_A_fumigatus_Af293:293,028..295,184(-)	protein of unknown function protein coding gene Afua_8G01260
Afu8g01710	Up	Afu8g01710-T	Aspergillus fumigatus Af293	Chr8_A_fumigatus_Af293:449,689..450,192(+)	Antigenic thaumatin domain protein protein coding gene Afua_8G01710
Afu8g02040	Up	Afu8g02040-T	Aspergillus fumigatus Af293	Chr8_A_fumigatus_Af293:530,595..531,997(+)	Putative alpha-1,6-mannosyltransferase protein coding gene Afua_8G02040
Afu8g02430	Up	Afu8g02430-T	Aspergillus fumigatus Af293	Chr8_A_fumigatus_Af293:649,112..650,693(-)	Putative alcohol dehydrogenase protein coding gene Afua_8G02430
Afu8g02570	Up	Afu8g02570-T	Aspergillus fumigatus Af293	Chr8_A_fumigatus_Af293:685,192..687,620(-)	Putative Baeyer-Villiger monooxygenase (BVMO) protein coding gene Afua_8G02570
Afu8g02590	Up	Afu8g02590-T	Aspergillus fumigatus Af293	Chr8_A_fumigatus_Af293:687,754..688,996(+)	Ortholog(s) have steryl deacetylase activity, role in response to toxic substance, sterol deacetylation and endoplasmic reticulum lumen, integral component of membrane, lipid particle	locali	zation	protei	n coding	gene	Afua_8G02590
Afu8g05030	Up	Afu8g05030-T	Aspergillus fumigatus Af293	Chr8_A_fumigatus_Af293:1,173,733..1,174,416(-)	Ortholog of A. nidulans FGSC A4 : AN10816, A. oryzae RIB40 : AO090003001446, AO090009000107, Aspergillus versicolor : Aspve1_0130291 and Aspergillus clavatus NRRL 1 : ACLA_058430	protei	n coding	gene	Afua_8G	5030

## Sheet: Descr of the 62 DOWN
Gene ID sourc		e_id Organi	sm Genomic Locat	ion (Gene)	Product Description Gene Type Input ID
Afu1g03352	Down	Afu1g03352-T	Aspergillus fumigatus	Af293	Chr1_A_fumigatus_Af293:968,547..972,745(-)	Has domain(s) with predicted hydrolase activity protein coding gene Afua_1G03352
Afu1g03660	Down	Afu1g03660-T	Aspergillus fumigatus	Af293	Chr1_A_fumigatus_Af293:1,063,293..1,065,341(+)	Has domain(s) with predicted hydrolase activity protein coding gene Afua_1G03660
Afu1g04130	Down	Afu1g04130-T	Aspergillus fumigatus	Af293	Chr1_A_fumigatus_Af293:1,184,805..1,186,730(+)	FG-GAP repeat protein protein coding gene Afua_1G04130
Afu1g10130	Down	Afu1g10130-T	Aspergillus fumigatus	Af293	Chr1_A_fumigatus_Af293:2,610,281..2,611,841(-)	Putative adenosylhomocysteinase protein coding gene Afua_1G10130
Afu1g10820	Down	Afu1g10820-T	Aspergillus fumigatus	Af293	Chr1_A_fumigatus_Af293:2,822,605..2,823,301(-)	Ortholog(s) have adenylylsulfate kinase activity, role in methionine biosynthetic process, sulfate assimilation, phosphoadenylyl sulfate reduction by phosphoadenylyl-sulfate reductase (thioredoxin) a	nd cytos	ol, nuc	leus loca	lization protein coding gene Afua_1G10820
Afu1g14410	Down	Afu1g14410-T	Aspergillus fumigatus	Af293	Chr1_A_fumigatus_Af293:3,851,698..3,852,806(+)	60S ribosomal protein L17 protein coding gene Afua_1G14410
Afu1g16220	Down	Afu1g16220-T	Aspergillus fumigatus	Af293	Chr1_A_fumigatus_Af293:4,410,736..4,413,248(+)	Has domain(s) with predicted DNA binding, zinc ion binding activity, role in transcription, DNA-templated and nucleus localization protein coding gene Afua_1G16220
Afu1g17180	Down	Afu1g17180-T	Aspergillus fumigatus	Af293	Chr1_A_fumigatus_Af293:4,682,284..4,683,962(-)	Putative pyridine nucleotide-disulphide oxidoreductase protein coding gene Afua_1G17180
Afu2g00580	Down	Afu2g00580-T	Aspergillus fumigatus	Af293	Chr2_A_fumigatus_Af293:125,715..125,945(+)	Ortholog of A. fumigatus Af293 : Afu7g05490, Neosartorya fischeri NRRL 181 : NFIA_032770, Aspergillus wentii : Aspwe1_0035458 and Aspergillus clavatus NRRL 1 : ACLA_007180, ACLA_093940 protein	coding	gene	Afua_2G	580
Afu2g00990	Down	Afu2g00990-T	Aspergillus fumigatus	Af293	Chr2_A_fumigatus_Af293:227,006..228,365(+)	Ortholog(s) have phosphatidylglycerol phospholipase C activity, role in phosphatidylglycerol catabolic process and lipid particle, mitochondrion localization protein coding gene Afua_2G00990
Afu2g05150	Down	Afu2g05150-T	Aspergillus fumigatus	Af293	Chr2_A_fumigatus_Af293:1,423,862..1,430,848(-)	Putative glycophosphatidylinositol (GPI)-anchored cell wall protein protein coding gene Afua_2G05150
Afu2g07680	Down	Afu2g07680-T	Aspergillus fumigatus	Af293	Chr2_A_fumigatus_Af293:1,957,879..1,966,865(-)	L-ornithine N5-oxygenase protein coding gene Afua_2G07680
Afu2g17850	Down	Afu2g17850-T	Aspergillus fumigatus	Af293	Chr2_A_fumigatus_Af293:4,746,173..4,747,487(-)	Has domain(s) with predicted 3-beta-hydroxy-delta5-steroid dehydrogenase activity and role in oxidation-reduction process, steroid biosynthetic process protein coding gene Afua_2G17850
Afu3g02050	Down	Afu3g02050-T	Aspergillus fumigatus	Af293	Chr3_A_fumigatus_Af293:503,252..503,773(+)	Ortholog of A. nidulans FGSC A4 : AN1754, AN8607, A. niger CBS 513.88 : An11g06690, An18g01930, A. oryzae RIB40 : AO090001000144 and Aspergillus wentii : Aspwe1_0028029, Aspwe1_0705658 protein	coding	gene	Afua_3G	2050
Afu3g03390	Down	Afu3g03390-T	Aspergillus fumigatus	Af293	Chr3_A_fumigatus_Af293:902,202..903,482(-)	Siderophore biosynthesis lipase/esterase, putative protein coding gene Afua_3G03390
Afu3g03400	Down	Afu3g03400-T	Aspergillus fumigatus	Af293	Chr3_A_fumigatus_Af293:904,824..906,300(-)	Siderophore biosynthesis acetylase AceI, putative protein coding gene Afua_3G03400
Afu3g03445	Down	Afu3g03445-T	Aspergillus fumigatus	Af293	Chr3_A_fumigatus_Af293:922,147..922,930(-)	Has domain(s) with predicted oxidoreductase activity and role in metabolic process protein coding gene Afua_3G03445
Afu3g03640	Down	Afu3g03640-T	Aspergillus fumigatus	Af293	Chr3_A_fumigatus_Af293:981,572..983,958(-)	Putative siderophore iron transporter protein coding gene Afua_3G03640
Afu3g03650	Down	Afu3g03650-T	Aspergillus fumigatus	Af293	Chr3_A_fumigatus_Af293:984,524..985,347(-)	Putative acetyltransferase with a predicted role in iron metabolism protein coding gene Afua_3G03650
Afu3g03660	Down	Afu3g03660-T	Aspergillus fumigatus	Af293	Chr3_A_fumigatus_Af293:986,666..988,020(-)	Putative esterase with a predicted role in iron metabolism protein coding gene Afua_3G03660
Afu3g10090	Down	Afu3g10090-T	Aspergillus fumigatus	Af293	Chr3_A_fumigatus_Af293:2,597,537..2,599,246(-)	Has domain(s) with predicted dihydroneopterin aldolase activity and role in folic acid-containing compound metabolic process protein coding gene Afua_3G10090
Afu3g10730	Down	Afu3g10730-T	Aspergillus fumigatus	Af293	Chr3_A_fumigatus_Af293:2,780,135..2,781,257(-)	40S ribosomal protein S7e protein coding gene Afua_3G10730
Afu3g14940	Down	Afu3g14940-T	Aspergillus fumigatus	Af293	Chr3_A_fumigatus_Af293:3,946,319..3,946,689(-)	Putative elastase inhibitor protein coding gene Afua_3G14940
Afu3g15010	Down	Afu3g15010-T	Aspergillus fumigatus	Af293	Chr3_A_fumigatus_Af293:3,958,390..3,959,333(-)	Putative methoxylase protein coding gene Afua_3G15010
Afu3g15340	Down	Afu3g15340-T	Aspergillus fumigatus	Af293	Chr3_A_fumigatus_Af293:4,034,038..4,035,801(-)	Ortholog of A. nidulans FGSC A4 : AN10483, AN2809, AN2115, AN0033, AN12460, A. fumigatus Af293 : Afu2g00940, Afu2g16560, Afu7g00460, Afu7g06360 and A. niger CBS 513.88 : An14g02830, An16g00830	protein	coding	gene	Afua_3G15340
Afu4g00440	Down	Afu4g00440-T	Aspergillus fumigatus	Af293	Chr4_A_fumigatus_Af293:113,685..115,352(-)	Has domain(s) with predicted oxidoreductase activity and role in metabolic process protein coding gene Afua_4G00440
Afu4g00450	Down	Afu4g00450-T	Aspergillus fumigatus	Af293	Chr4_A_fumigatus_Af293:116,378..117,675(+)	Ortholog of Aspergillus fumigatus A1163 : AFUB_100990 protein coding gene Afua_4G00450
Afu4g00460	Down	Afu4g00460-T	Aspergillus fumigatus	Af293	Chr4_A_fumigatus_Af293:118,052..120,070(-)	Ortholog of A. nidulans FGSC A4 : AN8593, A. fumigatus Af293 : Afu3g02790, A. niger CBS 513.88 : An11g01410 and A. oryzae RIB40 : AO090009000455, AO090138000169 protein coding gene Afua_4G	460
Afu4g01350	Down	Afu4g01350-T	Aspergillus fumigatus	Af293	Chr4_A_fumigatus_Af293:353,357..356,355(-)	G-protein coupled receptor protein coding gene Afua_4G01350
Afu4g01360	Down	Afu4g01360-T	Aspergillus fumigatus	Af293	Chr4_A_fumigatus_Af293:358,246..360,264(+)	Has domain(s) with predicted role in transmembrane transport and integral component of membrane localization protein coding gene Afua_4G01360
Afu4g02980	Down	Afu4g02980-T	Aspergillus fumigatus	Af293	Chr4_A_fumigatus_Af293:832,561..833,184(-)	Ortholog(s) have cytosol, nucleus localization protein coding gene Afua_4G02980
Afu4g03010	Down	Afu4g03010-T	Aspergillus fumigatus	Af293	Chr4_A_fumigatus_Af293:843,920..844,639(-)	protein of unknown function protein coding gene Afua_4G03010
Afu4g11730	Down	Afu4g11730-T	Aspergillus fumigatus	Af293	Chr4_A_fumigatus_Af293:3,101,683..3,103,518(+)	Putative glycerol dehydrogenase protein coding gene Afua_4G11730
Afu4g12740	Down	Afu4g12740-T	Aspergillus fumigatus	Af293	Chr4_A_fumigatus_Af293:3,340,258..3,342,097(+)	Has domain(s) with predicted tRNA (adenine-N1-)-methyltransferase activity, role in tRNA methylation and tRNA (m1A) methyltransferase complex localization protein coding gene Afua_4G12740
Afu4g13770	Down	Afu4g13770-T	Aspergillus fumigatus	Af293	Chr4_A_fumigatus_Af293:3,603,799..3,604,964(+)	putative glycosyl hydrolase protein coding gene Afua_4G13770
Afu4g14300	Down	Afu4g14300-T	Aspergillus fumigatus	Af293	Chr4_A_fumigatus_Af293:3,737,559..3,740,042(-)	Has domain(s) with predicted GTP binding, GTPase activity protein coding gene Afua_4G14300
Afu5g00580	Down	Afu5g00580-T	Aspergillus fumigatus	Af293	Chr5_A_fumigatus_Af293:165,766..167,189(-)	Ortholog of Neosartorya fischeri NRRL 181 : NFIA_041910 and Aspergillus fumigatus A1163 : AFUB_049050 protein coding gene Afua_5G00580
Afu5g00920	Down	Afu5g00920-T	Aspergillus fumigatus	Af293	Chr5_A_fumigatus_Af293:241,535..242,761(+)	Ortholog(s) have intracellular localization protein coding gene Afua_5G00920
Afu5g01030	Down	Afu5g01030-T	Aspergillus fumigatus	Af293	Chr5_A_fumigatus_Af293:266,294..270,326(-)	Putative glyceraldehyde 3-phosphate dehydrogenase protein coding gene Afua_5G01030
Afu5g01330	Down	Afu5g01330-T	Aspergillus fumigatus	Af293	Chr5_A_fumigatus_Af293:337,231..340,082(+)	Has domain(s) with predicted acid phosphatase activity, hydrolase activity, metal ion binding activity protein coding gene Afua_5G01330
Afu5g01610	Down	Afu5g01610-T	Aspergillus fumigatus	Af293	Chr5_A_fumigatus_Af293:411,933..412,139(-)	Ortholog of Aspergillus fumigatus A1163 : AFUB_050150 protein coding gene Afua_5G01610
Afu5g01630	Down	Afu5g01630-T	Aspergillus fumigatus	Af293	Chr5_A_fumigatus_Af293:414,816..416,800(+)	Ortholog(s) have drug transmembrane transporter activity and role in cellular response to biotic stimulus, drug transmembrane transport, fluconazole transport, peptide transport, spermidine transport	protein	coding	gene	Afua_5G01630
Afu5g01640	Down	Afu5g01640-T	Aspergillus fumigatus	Af293	Chr5_A_fumigatus_Af293:417,463..418,617(+)	Ortholog of Neosartorya fischeri NRRL 181 : NFIA_040440, Aspergillus fumigatus A1163 : AFUB_050180 and Aspergillus clavatus NRRL 1 : ACLA_003640 protein coding gene Afua_5G01640
Afu5g01662	Down	Afu5g01662-T	Aspergillus fumigatus	Af293	Chr5_A_fumigatus_Af293:421,501..423,816(+)	Has domain(s) with predicted DNA binding, zinc ion binding activity, role in transcription, DNA-templated and nucleus localization protein coding gene Afua_5G01662
Afu5g10420	Down	Afu5g10420-T	Aspergillus fumigatus	Af293	Chr5_A_fumigatus_Af293:2,664,157..2,667,894(-)	Has domain(s) with predicted electron carrier activity, heme binding, metal ion binding, molybdenum ion binding, oxidoreductase activity and role in nitrate assimilation, oxidation-reduction process	protein	coding	gene	Afua_5G10420
Afu5g12550	Down	Afu5g12550-T	Aspergillus fumigatus	Af293	Chr5_A_fumigatus_Af293:3,254,110..3,255,089(+)	Ortholog(s) have endoplasmic reticulum localization protein coding gene Afua_5G12550
Afu5g14610	Down	Afu5g14610-T	Aspergillus fumigatus	Af293	Chr5_A_fumigatus_Af293:3,788,121..3,789,763(-)	Putative carboxypeptidase Y protein coding gene Afua_5G14610
Afu5g14780	Down	Afu5g14780-T	Aspergillus fumigatus	Af293	Chr5_A_fumigatus_Af293:3,818,808..3,821,303(+)	Putative trehalase phosphorylase with a predicted role in the glucose-1-phosphate pathway protein coding gene Afua_5G14780
Afu6g00720	Down	Afu6g00720-T	Aspergillus fumigatus	Af293	Chr6_A_fumigatus_Af293:181,629..181,926(-)	Has domain(s) with predicted role in cell wall macromolecule catabolic process protein coding gene Afua_6G00720
Afu6g00750	Down	Afu6g00750-T	Aspergillus fumigatus	Af293	Chr6_A_fumigatus_Af293:185,331..187,108(+)	Putative pyruvate decarboxylase protein coding gene Afua_6G00750
Afu6g00760	Down	Afu6g00760-T	Aspergillus fumigatus	Af293	Chr6_A_fumigatus_Af293:187,925..189,297(-)	Predicted glutathione S transferase protein coding gene Afua_6G00760
Afu6g00770	Down	Afu6g00770-T	Aspergillus fumigatus	Af293	Chr6_A_fumigatus_Af293:189,396..190,922(-)	Putative extracellular arabinanase protein coding gene Afua_6G00770
Afu6g03190	Down	Afu6g03190-T	Aspergillus fumigatus	Af293	Chr6_A_fumigatus_Af293:678,426..679,379(+)	Ortholog of A. nidulans FGSC A4 : AN2111, A. fumigatus Af293 : Afu2g05230, A. niger CBS 513.88 : An11g05190, A. oryzae RIB40 : AO090010000628, AO090003000332 and Aspergillus wentii : Aspwe1_0055162	protein	coding	gene	Afua_6G03190
Afu6g10720	Down	Afu6g10720-T	Aspergillus fumigatus	Af293	Chr6_A_fumigatus_Af293:2,647,926..2,649,944(-)	Putative alpha-ketoglutarate-dependent taurine dioxygenase protein coding gene Afua_6G10720
Afu6g11620	Down	Afu6g11620-T	Aspergillus fumigatus	Af293	Chr6_A_fumigatus_Af293:2,883,520..2,902,459(+)	Formyltetrahydrofolate deformylase protein coding gene Afua_6G11620
Afu6g12990	Down	Afu6g12990-T	Aspergillus fumigatus	Af293	Chr6_A_fumigatus_Af293:3,279,115..3,280,591(-)	Putative cytosolic large ribosomal subunit protein L7A protein coding gene Afua_6G12990
Afu7g00420	Down	Afu7g00420-T	Aspergillus fumigatus	Af293	Chr7_A_fumigatus_Af293:114,830..116,283(-)	Ortholog of A. nidulans FGSC A4 : AN3303, AN3346, AN3348, AN2044, AN8727 and A. fumigatus Af293 : Afu4g10080, Afu8g06100, Afu4g01242 protein coding gene Afua_7G00420
Afu7g00440	Down	Afu7g00440-T	Aspergillus fumigatus	Af293	Chr7_A_fumigatus_Af293:116,884..118,903(+)	Ortholog of A. nidulans FGSC A4 : AN8726, A. fumigatus Af293 : Afu8g06090, Afu8g06580 and A. niger CBS 513.88 : An02g08340, An02g09540, An03g00430 protein coding gene Afua_7G00440
Afu7g06150	Down	Afu7g06150-T	Aspergillus fumigatus	Af293	Chr7_A_fumigatus_Af293:1,511,096..1,511,900(+)	Putative secreted cellulase protein coding gene Afua_7G06150
Afu8g02010	Down	Afu8g02010-T	Aspergillus fumigatus	Af293	Chr8_A_fumigatus_Af293:520,732..523,488(+)	Has domain(s) with predicted substrate-specific transmembrane transporter activity, transmembrane transporter activity, role in transmembrane transport and integral component of membrane, membrane lo	calizati	on	protein	coding gene Afua_8G02010
Afu8g02490	Down	Afu8g02490-T	Aspergillus fumigatus	Af293	Chr8_A_fumigatus_Af293:663,968..665,922(+)	Ortholog of A. niger CBS 513.88 : An07g06230, Aspergillus brasiliensis : Aspbr1_0054487, Neosartorya fischeri NRRL 181 : NFIA_096210 and Aspergillus fumigatus A1163 : AFUB_084100 protein coding	gene	Afua_8	G02490

## Sheet: Core DEGs all isol. + Treatm,
												Name
CADAFUAG00002535	405.624	-1.35498	0.328812	-4.12083	3.77517e-05	0.0021633	Isa	181	CADAFUAG00002535	AFUA_5G01630	Afu5g01630	NA	MFS multidrug transporter; putative [Source:UniProtKB/TrEMBL
CADAFUAG00001684	365.965	-0.920684	0.296737	-3.1027	0.00191766	0.0545918	Isa	181	CADAFUAG00001684	AFUA_6G11620	Afu6g11620	NA	Formyltetrahydrofolate deformylase; putative [Source:UniProtKB/TrEMBL
CADAFUAG00004489	596.063	1.23288	0.276787	4.45424	8.419e-06	0.000612931	Isa	181	CADAFUAG00004489	AFUA_2G15140	Afu2g15140	NA	MFS drug transporter; putative [Source:UniProtKB/TrEMBL
CADAFUAG00001902	102.368	2.03741	0.610371	3.33799	0.000843866	0.0288278	Isa	181	CADAFUAG00001902	AFUA_6G14140	Afu6g14140	NA	RTA1 domain protein; putative [Source:UniProtKB/TrEMBL
CADAFUAG00004352	7697.81	1.27557	0.288607	4.41974	9.8819e-06	0.000702168	Isa	181	CADAFUAG00004352	AFUA_2G15130	Afu2g15130	abcA	ABC multidrug transporter; putative [Source:UniProtKB/TrEMBL
CADAFUAG00007085	15021.4	1.29439	0.253572	5.10462	3.31457e-07	3.27111e-05	Isa	181	CADAFUAG00007085	AFUA_1G14330	Afu1g14330	cdr1b/abcC	ABC transporter; putative [Source:UniProtKB/TrEMBL
CADAFUAG00003596	108.735	1.52641	0.489369	3.11914	0.00181381	0.0519686	Isa	181	CADAFUAG00003596	AFUA_2G00410	Afu2g00410	NA	Amidase family protein [Source:UniProtKB/TrEMBL
CADAFUAG00001006	569.798	1.56405	0.396155	3.94809	7.87777e-05	0.00404453	Isa	181	CADAFUAG00001006	AFUA_8G02430	Afu8g02430	NA	Zinc-binding alcohol dehydrogenase; putative [Source:UniProtKB/TrEMBL
CADAFUAG00007087	190.818	1.47126	0.441587	3.33174	0.000863041	0.0293698	Isa	181	CADAFUAG00007087	AFUA_1G12400	Afu1g12400	NA	Putative uncharacterized protein [Source:UniProtKB/TrEMBL
CADAFUAG00001984	901.66	0.901748	0.253401	3.55858	0.00037287	0.0145896	Isa	181	CADAFUAG00001984	AFUA_6G08760	Afu6g08760	NA	Proline oxidase PrnD [Source:UniProtKB/TrEMBL
CADAFUAG00008653	4949.82	2.37408	0.399851	5.93743	2.89526e-09	5.0423e-07	Isa	181	CADAFUAG00008653	AFUA_1G06480	Afu1g06480	NA	Putative uncharacterized protein [Source:UniProtKB/TrEMBL
CADAFUAG00004598	575.07	1.75555	0.364553	4.81562	1.46743e-06	0.00012413	Isa	181	CADAFUAG00004598	AFUA_2G15110	Afu2g15110	NA	C2H2 finger domain protein; putative [Source:UniProtKB/TrEMBL
