# Supplementary material for: The Transcriptome Response to Azole Compounds in Aspergillus fumigatus Shows Differential Gene Expression across Pathways Essential for Azole Resistance and Cell Survival
Source: J Fungi (Basel). 2023 Jul 30;9(8):807. doi: 10.3390/jof9080807 (PMC10455693; doi:10.3390/jof9080807)
Supplement: Supplementary file 1 [file jof-09-00807-s001.zip › Table S6 - Base expression R vs S.xlsx]

## Sheet: Base Expression V162(R) vs V147
	baseMean	log2FoldChange	lfcSE	stat	pvalue	padj
CADAFUAG00000396	1999.51	-12.7735	0.823491	-15.5114	2.90281e-54	6.0045e-52	AFUA_3G00130	Afu3G00130	Putative uncharacterized protein [Source:UniProtKB/TrEMBL
CADAFUAG00003275	4669.61	-12.7561	0.537871	-23.7159	2.47359e-124	3.00603e-121	AFUA_8G06490	Afu8G06490	Putative uncharacterized protein [Source:UniProtKB/TrEMBL
CADAFUAG00002338	541.987	-12.3431	1.02802	-12.0066	3.27992e-33	2.87274e-31	AFUA_6G14620	Afu6G14620	Probable alpha-N-arabinofuranosidase B [Source:UniProtKB/Swiss-Prot
CADAFUAG00000110	777.884	-11.9778	1.05104	-11.3961	4.37177e-30	3.32049e-28	AFUA_3G00150	Afu3G00150	Short-chain dehydrogenase/oxidoreductase; putative [Source:UniProtKB/TrEMBL
CADAFUAG00000105	7923.29	-11.5648	0.688262	-16.803	2.32118e-63	5.93855e-61	AFUA_3G00180	Afu3G00180	Short chain dehydrogenase (AtsC); putative [Source:UniProtKB/TrEMBL
CADAFUAG00000376	1330.19	-11.4316	0.845109	-13.5268	1.08629e-41	1.53056e-39	AFUA_3G02520	Afu3G02520	MFS multidrug transporter; putative [Source:UniProtKB/TrEMBL
CADAFUAG00009599	54.0727	-9.76171	1.04163	-9.37158	7.14576e-21	3.04698e-19	AFUA_7G06940	Afu7G06940	Fungal specific transcription factor; putative [Source:UniProtKB/TrEMBL
CADAFUAG00000009	103.325	-9.5835	1.03776	-9.23481	2.58742e-20	1.04055e-18	AFUA_3G00140	Afu3G00140	Putative uncharacterized protein [Source:UniProtKB/TrEMBL
CADAFUAG00000237	47.463	-9.57576	1.04046	-9.2034	3.4681e-20	1.38184e-18	AFUA_3G02480	Afu3G02480	C6 transcription factor; putative [Source:UniProtKB/TrEMBL
CADAFUAG00002030	52.3528	-9.55215	1.03841	-9.19881	3.61944e-20	1.42531e-18	AFUA_6G14630	Afu6G14630	Putative uncharacterized protein [Source:UniProtKB/TrEMBL
CADAFUAG00000201	67.9291	-9.5036	1.06472	-8.92588	4.42188e-19	1.5805e-17	AFUA_3G00170	Afu3G00170	Putative uncharacterized protein [Source:UniProtKB/TrEMBL
CADAFUAG00000055	55.781	-9.4501	1.04265	-9.06354	1.26278e-19	4.75844e-18	AFUA_3G00175	Afu3G00175	Putative uncharacterized protein [Source:UniProtKB/TrEMBL
CADAFUAG00002712	32.5301	-9.01352	1.05259	-8.56318	1.09797e-17	3.51254e-16	AFUA_5G01005	Afu5G01005	Putative uncharacterized protein [Source:UniProtKB/TrEMBL
CADAFUAG00003581	102.682	-8.9638	1.03372	-8.67143	4.26735e-18	1.43059e-16	AFUA_2G00850	Afu2G00850	Putative uncharacterized protein [Source:UniProtKB/TrEMBL
CADAFUAG00000029	779.727	-8.88325	0.668594	-13.2865	2.7738e-40	3.64418e-38	AFUA_3G03290	Afu3G03290	Putative uncharacterized protein [Source:UniProtKB/TrEMBL
CADAFUAG00009527	28.7283	-8.85158	1.05799	-8.36641	5.93978e-17	1.72894e-15	AFUA_7G06970	Afu7G06970
CADAFUAG00000138	21.3718	-8.40756	1.05955	-7.93506	2.10391e-15	5.11354e-14	AFUA_3G02500	Afu3G02500	Protein kinase; putative [Source:UniProtKB/TrEMBL
CADAFUAG00000998	28.8513	-8.05463	1.06523	-7.56137	3.98838e-14	8.61666e-13	AFUA_8G02280	Afu8G02280	C6 transcription factor; putative [Source:UniProtKB/TrEMBL
CADAFUAG00000197	34.0895	-7.96687	1.04701	-7.60919	2.7583e-14	6.03967e-13	AFUA_3G00410	Afu3G00410	Putative uncharacterized protein [Source:UniProtKB/TrEMBL
CADAFUAG00001992	16.2116	-7.77313	1.07329	-7.24234	4.40998e-13	8.52363e-12	AFUA_6G13820	Afu6G13820	Putative uncharacterized protein [Source:UniProtKB/TrEMBL
CADAFUAG00009572	13.3653	-7.74142	1.07802	-7.18114	6.91312e-13	1.30251e-11	AFUA_7G06981	Afu7G06981	Putative uncharacterized protein [Source:UniProtKB/TrEMBL
CADAFUAG00000125	24.4875	-7.49011	1.08985	-6.87258	6.30498e-12	1.06976e-10	AFUA_3G00110	Afu3G00110	Succinate-semialdehyde dehydrogenase; putative [Source:UniProtKB/TrEMBL
CADAFUAG00000215	9.67962	-7.27805	1.09215	-6.66395	2.66567e-11	4.1867e-10	AFUA_3G02450	Afu3G02450	Putative uncharacterized protein [Source:UniProtKB/TrEMBL
CADAFUAG00009629	8.91569	-7.04492	1.13157	-6.22577	4.79193e-10	6.47944e-09	AFUA_7G06950	Afu7G06950	Oxidoreductase; putative [Source:UniProtKB/TrEMBL
CADAFUAG00001663	8.22471	-6.83683	1.11123	-6.15251	7.62654e-10	1.00741e-08	AFUA_6G14640	Afu6G14640	MFS toxin transporter; putative [Source:UniProtKB/TrEMBL
CADAFUAG00001043	27.0974	-6.73065	0.875967	-7.68368	1.54577e-14	3.42323e-13	AFUA_7G00600	Afu7G00600	Hydrolase; CocE/NonD family; putative [Source:UniProtKB/TrEMBL
CADAFUAG00008439	29.1113	-6.5937	0.856553	-7.69795	1.38263e-14	3.07596e-13
CADAFUAG00000074	47.6348	-6.44573	0.63379	-10.1701	2.69544e-24	1.48758e-22	AFUA_3G01420	Afu3G01420	DUF341 family oxidoreductase; putative [Source:UniProtKB/TrEMBL
CADAFUAG00001173	55.4176	-6.38541	1.26447	-5.04988	4.4209e-07	3.82044e-06	AFUA_7G00170	Afu7G00170	Dimethylallyl tryptophan synthase GliD1 [Source:UniProtKB/TrEMBL
CADAFUAG00000020	7.65163	-6.36039	1.09211	-5.82394	5.74767e-09	6.73239e-08	AFUA_3G00100	Afu3G00100	Flavin-containing amine oxidase; putative [Source:UniProtKB/TrEMBL
CADAFUAG00000383	960.725	-6.32645	0.382031	-16.56	1.35545e-61	3.29442e-59	AFUA_3G03040	Afu3G03040	Putative uncharacterized protein [Source:UniProtKB/TrEMBL
CADAFUAG00009380	4.81326	-6.23089	1.19578	-5.21072	1.8811e-07	1.74671e-06	AFUA_7G06960	Afu7G06960	Monooxygenase; putative [Source:UniProtKB/TrEMBL
CADAFUAG00000224	4.14836	-5.96486	1.20312	-4.95783	7.12857e-07	5.95424e-06	AFUA_3G02460	Afu3G02460	Serine protein kinase; putative [Source:UniProtKB/TrEMBL
CADAFUAG00000148	227.155	-5.61368	0.342252	-16.4022	1.84406e-60	4.37267e-58	AFUA_3G01290	Afu3G01290	AMID-like mitochondrial oxidoreductase; putative [Source:UniProtKB/TrEMBL
CADAFUAG00001097	661.158	-5.37128	0.221453	-24.2547	5.89647e-130	9.55424e-127	AFUA_7G00805	Afu7G00805	Putative uncharacterized protein [Source:UniProtKB/TrEMBL
CADAFUAG00000570	358.963	-5.2427	0.305227	-17.1764	3.98886e-66	1.07721e-63	AFUA_6G03350	Afu6G03350	GNAT family N-acetyltransferase; putative [Source:UniProtKB/TrEMBL
CADAFUAG00001060	24.6437	-5.22901	0.620038	-8.43338	3.35834e-17	9.92393e-16	AFUA_7G00290	Afu7G00290	Cytochrome P450 monooxygenase; putative [Source:UniProtKB/TrEMBL
CADAFUAG00006704	497.932	-5.09526	0.689328	-7.39163	1.45042e-13	2.98118e-12	AFUA_5G10070	Afu5G10070	3-hydroxyacyl-CoA dehydrogenase; putative [Source:UniProtKB/TrEMBL
CADAFUAG00000788	4.68625	-5.07507	1.16471	-4.35738	1.31629e-05	8.59431e-05	AFUA_8G02290	Afu8G02290	Putative uncharacterized protein [Source:UniProtKB/TrEMBL
CADAFUAG00003165	108.728	-5.04096	0.294904	-17.0936	1.65689e-65	4.35359e-63	AFUA_8G06050	Afu8G06050	Salicylate hydroxylase; putative [Source:UniProtKB/TrEMBL
CADAFUAG00009632	2.00321	-5.02372	1.39044	-3.61304	0.000302633	0.00142341	AFUA_7G07000	Afu7G07000	Fumarylacetoacetate hydrolase family protein [Source:UniProtKB/TrEMBL
CADAFUAG00001085	26.3833	-5.01609	1.28756	-3.89582	9.78689e-05	0.000523079	AFUA_7G00160	Afu7G00160	Polyketide synthase; putative [Source:UniProtKB/TrEMBL
CADAFUAG00001228	1.94242	-4.97362	1.36973	-3.6311	0.000282213	0.00133865	AFUA_7G00610	Afu7G00610	Putative uncharacterized protein [Source:UniProtKB/TrEMBL
CADAFUAG00001129	158.872	-4.93549	0.312141	-15.8117	2.58199e-56	5.45697e-54	AFUA_7G01040	Afu7G01040	Cytidine deaminase; putative [Source:UniProtKB/TrEMBL
CADAFUAG00006726	392.351	-4.87546	0.612619	-7.95838	1.74304e-15	4.26848e-14	AFUA_5G10060	Afu5G10060	Cytochrome b5 reductase; putative [Source:UniProtKB/TrEMBL
CADAFUAG00008982	94.324	-4.82412	0.404034	-11.9399	7.33258e-33	6.25328e-31	AFUA_1G01550	Afu1G01550	High affinity zinc ion transporter; putative [Source:UniProtKB/TrEMBL
CADAFUAG00004153	285.321	-4.68674	0.606367	-7.72921	1.08217e-14	2.45242e-13	AFUA_2G12680	Afu2G12680	Putative uncharacterized protein [Source:UniProtKB/TrEMBL
CADAFUAG00002507	25.2176	-4.49443	0.520546	-8.63406	5.92132e-18	1.93829e-16	AFUA_4G00400	Afu4G00400	O-methyltransferase; putative [Source:UniProtKB/TrEMBL
CADAFUAG00007359	2.70938	-4.47911	1.19962	-3.73376	0.000188641	0.000939533	AFUA_1G17730	Afu1G17730	Zinc binding enoyl reductase; putative [Source:UniProtKB/TrEMBL
CADAFUAG00007056	99.4293	-4.35422	0.272746	-15.9644	2.26319e-57	4.8895e-55	AFUA_1G16440	Afu1G16440	ABC ATPase; putative [Source:UniProtKB/TrEMBL
CADAFUAG00000891	367.26	-4.20417	0.366	-11.4868	1.53693e-30	1.19536e-28	AFUA_8G00610	Afu8G00610	Cell surface protein Mas1; putative [Source:UniProtKB/TrEMBL
CADAFUAG00000061	18.064	-4.19037	0.751089	-5.57906	2.41824e-08	2.52797e-07	AFUA_3G02850	Afu3G02850	Putative uncharacterized protein [Source:UniProtKB/TrEMBL
CADAFUAG00001486	58.7783	-4.18747	0.31891	-13.1306	2.20022e-39	2.74238e-37	AFUA_4G02960	Afu4G02960	UDP-sugar hydrolase; putative [Source:UniProtKB/TrEMBL
CADAFUAG00007262	68.5008	-4.16206	0.338399	-12.2992	9.14224e-35	9.06948e-33	AFUA_1G17740	Afu1G17740	Polyketide synthase; putative [Source:UniProtKB/TrEMBL
CADAFUAG00000189	268.906	-3.98517	0.359144	-11.0963	1.30786e-28	9.01776e-27	AFUA_3G03010	Afu3G03010	Phosphate-repressible Na+/phosphate cotransporter Pho89; putative [Source:UniProtKB/TrEMBL
CADAFUAG00001372	22.6662	-3.97657	0.498389	-7.97884	1.47714e-15	3.69171e-14	AFUA_4G02950	Afu4G02950	Nucleotidase; putative [Source:UniProtKB/TrEMBL
CADAFUAG00009722	1.9874	-3.89727	1.49074	-2.61433	0.00894035	0.0265156	AFUA_7G00365	Afu7G00365
CADAFUAG00009881	1.64629	-3.89574	3.70668	-1.051	0.293256	0.440791			8s_rRNA [Source:RNAMMER
CADAFUAG00000295	2.13201	-3.8883	1.27619	-3.0468	0.0023129	0.00834671	AFUA_3G00120	Afu3G00120	Amino acid transporter (Mtr); putative [Source:UniProtKB/TrEMBL
CADAFUAG00007689	3.44425	-3.88654	1.21145	-3.20818	0.00133577	0.00515945
CADAFUAG00000985	1.74874	-3.86791	1.29064	-2.99688	0.00272756	0.0096567	AFUA_8G02300	Afu8G02300	FMN-dependent dehydrogenase family protein [Source:UniProtKB/TrEMBL
CADAFUAG00000785	30.5898	-3.86117	0.389372	-9.91641	3.53225e-23	1.79793e-21	AFUA_8G00930	Afu8G00930	Chitosanase; putative [Source:UniProtKB/TrEMBL
CADAFUAG00002454	241.308	-3.79656	0.372291	-10.1978	2.02757e-24	1.1264e-22	AFUA_4G00280	Afu4G00280	Putative uncharacterized protein [Source:UniProtKB/TrEMBL
CADAFUAG00003833	291.028	-3.7692	0.254199	-14.8277	9.69575e-50	1.77853e-47	AFUA_2G00940	Afu2G00940	Putative uncharacterized protein [Source:UniProtKB/TrEMBL
CADAFUAG00000113	14.9025	-3.76326	0.632423	-5.95054	2.67263e-09	3.31275e-08	AFUA_3G02685	Afu3G02685	Putative uncharacterized protein [Source:UniProtKB/TrEMBL
CADAFUAG00000882	35.1045	-3.74892	0.443261	-8.45758	2.72982e-17	8.14091e-16	AFUA_8G00820	Afu8G00820	Rhamnogalacturonase; putative [Source:UniProtKB/TrEMBL
CADAFUAG00000268	30.3241	-3.74845	0.481212	-7.7896	6.72211e-15	1.57109e-13	AFUA_3G00765	Afu3G00765	N-acetyltransferase; GNAT family; putative [Source:UniProtKB/TrEMBL
CADAFUAG00005812	306.626	-3.71521	0.365645	-10.1607	2.96974e-24	1.62201e-22	AFUA_3G14770	Afu3G14770	Reductase; putative [Source:UniProtKB/TrEMBL
CADAFUAG00002638	20806.4	-3.69188	0.374893	-9.84783	7.00424e-23	3.49206e-21	AFUA_5G01030	Afu5G01030	Glyceraldehyde-3-phosphate dehydrogenase [Source:UniProtKB/TrEMBL
CADAFUAG00000830	4.10839	-3.66017	1.30217	-2.81081	0.00494164	0.0159876	AFUA_8G02310	Afu8G02310	Aldehyde dehydrogenase ALDH [Source:UniProtKB/TrEMBL
CADAFUAG00001812	3.69597	-3.60918	1.05412	-3.42387	0.000617356	0.00263474	AFUA_6G09800	Afu6G09800	Ankyrin repeat protein [Source:UniProtKB/TrEMBL
CADAFUAG00003711	426.377	-3.59284	0.995514	-3.60903	0.00030734	0.00144276	AFUA_2G04890	Afu2G04890	TAM domain methyltransferase; putative [Source:UniProtKB/TrEMBL
CADAFUAG00007222	1.23716	-3.49933	1.44424	-2.42295	0.015395	0.0418749	AFUA_1G16900	Afu1G16900	Putative uncharacterized protein [Source:UniProtKB/TrEMBL
CADAFUAG00001121	59.2049	-3.49891	0.423915	-8.25379	1.53443e-16	4.25006e-15	AFUA_7G00640	Afu7G00640	Aromatic ring-opening dioxygenase family protein [Source:UniProtKB/TrEMBL
CADAFUAG00001101	2.01343	-3.48986	1.38199	-2.52524	0.011562	0.0328067	AFUA_7G00310	Afu7G00310	Putative uncharacterized protein [Source:UniProtKB/TrEMBL
CADAFUAG00005621	0.975695	-3.48766	1.55402	-2.24428	0.0248144	0.062434	AFUA_3G15060	Afu3G15060	Glyoxalase family protein; putative [Source:UniProtKB/TrEMBL
CADAFUAG00000242	47.1486	-3.48148	0.432057	-8.05792	7.76005e-16	2.00115e-14	AFUA_3G00760	Afu3G00760	GNAT family N-acetyltransferase; putative [Source:UniProtKB/TrEMBL
CADAFUAG00000015	421.172	-3.47306	0.200751	-17.3003	4.67578e-67	1.2988e-64	AFUA_3G00540	Afu3G00540	MFS peptide transporter; putative [Source:UniProtKB/TrEMBL
CADAFUAG00000811	2.40619	-3.45645	1.30953	-2.63945	0.00830415	0.0248486	AFUA_8G01320	Afu8G01320	Putative uncharacterized protein [Source:UniProtKB/TrEMBL
CADAFUAG00003807	52.4906	-3.45149	0.475968	-7.25152	4.12126e-13	8.04651e-12	AFUA_2G00460	Afu2G00460	Short-chain dehydrogenase/reductase family protein; putative [Source:UniProtKB/TrEMBL
CADAFUAG00004175	36.3024	-3.39475	0.570508	-5.9504	2.67487e-09	3.31275e-08	AFUA_2G12720	Afu2G12720	Putative uncharacterized protein [Source:UniProtKB/TrEMBL
CADAFUAG00009814	1.68719	-3.39281	1.45659	-2.32928	0.0198441	0.0519032	AFUA_1G14078	Afu1G14078
CADAFUAG00000823	0.866606	-3.37763	1.88233	-1.79439	0.0727514	0.149172	AFUA_8G02260	Afu8G02260	Neutral amino acid permease [Source:UniProtKB/TrEMBL
CADAFUAG00006861	7.44074	-3.36548	0.753904	-4.46407	8.04166e-06	5.47665e-05	AFUA_1G17370	Afu1G17370	Heat shock protein Awh11; putative [Source:UniProtKB/TrEMBL
CADAFUAG00000337	0.619772	-3.3256	2.6282	-1.26535	0.205745	0.336969	AFUA_3G02470	Afu3G02470	Amidase family protein [Source:UniProtKB/TrEMBL
CADAFUAG00003293	82.206	-3.319	0.263321	-12.6044	1.99742e-36	2.23205e-34	AFUA_2G00550	Afu2G00550	Putative uncharacterized protein [Source:UniProtKB/TrEMBL
CADAFUAG00001022	46.7435	-3.30857	0.386898	-8.55153	1.21467e-17	3.85915e-16	AFUA_8G00600	Afu8G00600	NAD dependent epimerase/dehydratase family protein [Source:UniProtKB/TrEMBL
CADAFUAG00004246	9.84624	-3.28861	0.806877	-4.07573	4.58695e-05	0.000264498	AFUA_2G12730	Afu2G12730	Putative uncharacterized protein [Source:UniProtKB/TrEMBL
CADAFUAG00001165	19.1282	-3.28094	0.859195	-3.81862	0.0001342	0.000696952	AFUA_7G00180	Afu7G00180	NAD dependent epimerase/dehydratase; putative [Source:UniProtKB/TrEMBL
CADAFUAG00001182	1526.52	-3.27647	0.398184	-8.22854	1.89504e-16	5.21916e-15	AFUA_7G00370	Afu7G00370	Putative uncharacterized protein [Source:UniProtKB/TrEMBL
CADAFUAG00003269	8.4335	-3.23823	0.824464	-3.92768	8.5768e-05	0.000464274	AFUA_8G06060	Afu8G06060	Putative uncharacterized protein [Source:UniProtKB/TrEMBL
CADAFUAG00008664	2.63047	-3.22087	1.26304	-2.55009	0.0107694	0.030885	AFUA_1G00100	Afu1G00100	MFS monocarboxylate transporter; putative [Source:UniProtKB/TrEMBL
CADAFUAG00005416	185.813	-3.2187	0.371765	-8.65789	4.80563e-18	1.59455e-16	AFUA_3G14760	Afu3G14760	Cytochrome P450 monooxygenase (Fum15); putative [Source:UniProtKB/TrEMBL
CADAFUAG00008728	9.37269	-3.20216	0.740243	-4.32582	1.51966e-05	9.82324e-05	AFUA_1G02380	Afu1G02380	Putative uncharacterized protein [Source:UniProtKB/TrEMBL
CADAFUAG00003558	1211.3	-3.19087	0.182678	-17.4671	2.55016e-68	7.51292e-66	AFUA_2G03200	Afu2G03200	Structure-specific endonuclease subunit slx4 [Source:UniProtKB/Swiss-Prot
CADAFUAG00008903	1.29169	-3.17957	1.45334	-2.18777	0.0286864	0.0705622	AFUA_1G03670	Afu1G03670	Putative uncharacterized protein [Source:UniProtKB/TrEMBL
CADAFUAG00001436	110.72	-3.17088	0.28779	-11.018	3.12771e-28	2.14138e-26	AFUA_4G04380	Afu4G04380	Phenazine biosynthesis-like protein; putative [Source:UniProtKB/TrEMBL
CADAFUAG00005533	40.3973	-3.16793	0.453642	-6.98331	2.88296e-12	5.05923e-11	AFUA_3G07460	Afu3G07460	NACHT and WD domain protein [Source:UniProtKB/TrEMBL
CADAFUAG00002576	295.421	-3.15914	0.13339	-23.6835	5.3333e-124	5.18504e-121	AFUA_5G02990	Afu5G02990	Aromatic amino acid aminotransferase; putative [Source:UniProtKB/TrEMBL
CADAFUAG00003179	2720.56	-3.1528	0.108625	-29.0247	3.21154e-185	7.80564e-182	AFUA_8G04860	Afu8G04860	GPI anchored glycoprotein; putative [Source:UniProtKB/TrEMBL
CADAFUAG00003597	131.556	-3.13887	0.238616	-13.1545	1.60375e-39	2.05154e-37	AFUA_2G01960	Afu2G01960	UbiA prenyltransferase family protein [Source:UniProtKB/TrEMBL
CADAFUAG00000373	6.1231	-3.12127	0.889173	-3.5103	0.000447594	0.00199978	AFUA_3G03190	Afu3G03190	MFS multidrug transporter; putative [Source:UniProtKB/TrEMBL
CADAFUAG00004838	1.12526	-3.11558	2.09671	-1.48594	0.137296	0.24801	AFUA_2G18070	Afu2G18070	Metalloproteinase; putative [Source:UniProtKB/TrEMBL
CADAFUAG00003792	59.0335	-3.11554	0.342335	-9.10087	8.96078e-20	3.44335e-18	AFUA_2G05290	Afu2G05290	Isoflavone reductase family protein [Source:UniProtKB/TrEMBL
CADAFUAG00001653	18.6593	-3.11537	0.556005	-5.60313	2.10518e-08	2.22221e-07	AFUA_6G09540	Afu6G09540	Endoglucanase; putative [Source:UniProtKB/TrEMBL
CADAFUAG00008149	677.451	-3.09872	0.137487	-22.5382	1.75206e-112	1.31027e-109	AFUA_4G13510	Afu4G13510	Isocitrate lyase [Source:UniProtKB/Swiss-Prot
CADAFUAG00003453	120.608	-3.08714	0.262952	-11.7403	7.91716e-32	6.36121e-30	AFUA_2G05920	Afu2G05920	Putative uncharacterized protein [Source:UniProtKB/TrEMBL
CADAFUAG00003286	17.7247	-3.06998	0.425201	-7.22007	5.19606e-13	9.92458e-12	AFUA_8G06480	Afu8G06480	Rhamnogalacturonan acetylesterase superfamily protein [Source:UniProtKB/TrEMBL
CADAFUAG00000126	22.0537	-3.0573	0.45373	-6.73813	1.60433e-11	2.59522e-10	AFUA_3G00530	Afu3G00530	ATP/GTP-binding protein; putative [Source:UniProtKB/TrEMBL
CADAFUAG00008857	1115.87	-3.03967	1.31747	-2.30721	0.0210432	0.0544392	AFUA_1G01040	Afu1G01040	Pfs domain protein [Source:UniProtKB/TrEMBL
CADAFUAG00008547	13.0721	-3.03915	0.537982	-5.64917	1.61228e-08	1.732e-07	AFUA_4G14730	Afu4G14730	GNAT family acetyltransferase; putative [Source:UniProtKB/TrEMBL
CADAFUAG00002664	85.9914	-3.00483	0.279395	-10.7548	5.62674e-27	3.55215e-25	AFUA_5G00940	Afu5G00940	Putative uncharacterized protein [Source:UniProtKB/TrEMBL
CADAFUAG00006683	441.805	-2.99168	0.325227	-9.19876	3.62118e-20	1.42531e-18	AFUA_5G10930	Afu5G10930	Putative uncharacterized protein [Source:UniProtKB/TrEMBL
CADAFUAG00000668	1.64055	-2.97619	1.28809	-2.31054	0.0208585	0.0540907	AFUA_6G03310	Afu6G03310	Putative uncharacterized protein [Source:UniProtKB/TrEMBL
CADAFUAG00000207	671.018	-2.94284	0.240133	-12.255	1.57902e-34	1.55063e-32	AFUA_3G01430	Afu3G01430	Benzodiazepine receptor family protein [Source:UniProtKB/TrEMBL
CADAFUAG00003481	5395.84	-2.93521	0.14552	-20.1705	1.77793e-90	9.60278e-88	AFUA_2G05910	Afu2G05910	Hexokinase Kxk; putative [Source:UniProtKB/TrEMBL
CADAFUAG00000040	14.6655	-2.92969	0.529897	-5.5288	3.22428e-08	3.30658e-07	AFUA_3G02530	Afu3G02530	PKS-like enzyme; putative [Source:UniProtKB/TrEMBL
CADAFUAG00003454	1173.31	-2.92819	0.153626	-19.0606	5.36617e-81	2.37136e-78	AFUA_2G01720	Afu2G01720	Putative uncharacterized protein [Source:UniProtKB/TrEMBL
CADAFUAG00009864	3.42804	-2.91355	1.09463	-2.66168	0.00777513	0.0235556			8s_rRNA [Source:RNAMMER
CADAFUAG00002481	43.0256	-2.88858	0.303883	-9.50555	1.98995e-21	8.99828e-20	AFUA_4G01130	Afu4G01130	Dienelactone hydrolase family protein [Source:UniProtKB/TrEMBL
CADAFUAG00006617	25.2401	-2.87781	0.409352	-7.03016	2.06292e-12	3.70715e-11	AFUA_5G14240	Afu5G14240	ThiJ/PfpI family protein [Source:UniProtKB/TrEMBL
CADAFUAG00005444	1372.43	-2.83303	0.357424	-7.92623	2.25902e-15	5.45293e-14	AFUA_3G13010	Afu3G13010	Zn-dependent hydrolase/oxidoreductase family protein; putative [Source:UniProtKB/TrEMBL
CADAFUAG00003208	46.6108	-2.82663	0.338107	-8.36014	6.26423e-17	1.81252e-15	AFUA_8G05690	Afu8G05690	Acetyltransferase; GNAT family family [Source:UniProtKB/TrEMBL
CADAFUAG00003209	110.727	-2.82631	0.330559	-8.55008	1.23004e-17	3.89525e-16	AFUA_8G06760	Afu8G06760	MFS transporter; putative [Source:UniProtKB/TrEMBL
CADAFUAG00005562	0.654993	-2.82041	2.56746	-1.09852	0.271978	0.416576	AFUA_3G06160	Afu3G06160	Mating locus protein; putative [Source:UniProtKB/TrEMBL
CADAFUAG00009860	4.77109	-2.80814	0.983042	-2.85658	0.00428227	0.0141847			8s_rRNA [Source:RNAMMER
CADAFUAG00001212	128.065	-2.78227	0.3851	-7.22478	5.01906e-13	9.62432e-12	AFUA_7G00720	Afu7G00720	Putative uncharacterized protein [Source:UniProtKB/TrEMBL
CADAFUAG00000987	7.09873	-2.77136	0.661424	-4.18999	2.78971e-05	0.000170255	AFUA_8G00670	Afu8G00670	Integral membrane protein [Source:UniProtKB/TrEMBL
CADAFUAG00000277	433.868	-2.76439	0.152022	-18.1841	6.89435e-74	2.39382e-71	AFUA_3G02253	Afu3G02253	YjgH family protein [Source:UniProtKB/TrEMBL
CADAFUAG00001096	6509.2	-2.75979	0.18899	-14.6029	2.69191e-48	4.59136e-46	AFUA_7G00950	Afu7G00950	MFS monosaccharide transporter; putative [Source:UniProtKB/TrEMBL
CADAFUAG00002639	1564.34	-2.75862	0.136426	-20.2206	6.4463e-91	3.68653e-88	AFUA_5G00790	Afu5G00790	ABC multidrug transporter; putative [Source:UniProtKB/TrEMBL
CADAFUAG00002368	131.995	-2.74496	0.515165	-5.32831	9.91304e-08	9.56097e-07	AFUA_6G12000	Afu6G12000	Putative uncharacterized protein [Source:UniProtKB/TrEMBL
CADAFUAG00002736	203.815	-2.71228	0.250372	-10.833	2.40179e-27	1.54637e-25	AFUA_5G00910	Afu5G00910	MBL2-like secreted peptide; putative [Source:UniProtKB/TrEMBL
CADAFUAG00001193	24.9114	-2.70838	0.356034	-7.60709	2.80343e-14	6.12472e-13	AFUA_7G00570	Afu7G00570	Conserved hypotheitcal protein [Source:UniProtKB/TrEMBL
CADAFUAG00001378	1.27876	-2.70584	1.35182	-2.00162	0.0453253	0.101791	AFUA_4G02700	Afu4G02700	Neutral protease 2 homolog AFUB_070680 [Source:UniProtKB/Swiss-Prot
CADAFUAG00003263	2.4823	-2.7032	1.56409	-1.72829	0.0839368	0.168012	AFUA_8G07010	Afu8G07010	Putative uncharacterized protein [Source:UniProtKB/TrEMBL
CADAFUAG00001546	1212.77	-2.68865	0.233535	-11.5129	1.13656e-30	8.91096e-29	AFUA_6G00280	Afu6G00280	NmrA-like family protein [Source:UniProtKB/TrEMBL
CADAFUAG00004579	90.5581	-2.68441	0.238598	-11.2508	2.29601e-29	1.64804e-27	AFUA_2G17360	Afu2G17360	MFS monocarboxylate transporter (Mct); putative [Source:UniProtKB/TrEMBL
CADAFUAG00004303	9.42982	-2.68409	0.657291	-4.08356	4.43505e-05	0.000256805	AFUA_2G10680	Afu2G10680	Putative uncharacterized protein [Source:UniProtKB/TrEMBL
CADAFUAG00000188	108.009	-2.6798	0.18716	-14.3183	1.68305e-46	2.72709e-44	AFUA_3G03760	Afu3G03760	Putative uncharacterized protein [Source:UniProtKB/TrEMBL
CADAFUAG00007385	1875.01	-2.65845	0.249141	-10.6705	1.39939e-26	8.6107e-25	AFUA_1G16564	Afu1G16564	DUF455 domain protein [Source:UniProtKB/TrEMBL
CADAFUAG00000854	40.4332	-2.65	0.412526	-6.42383	1.32886e-10	1.89154e-09	AFUA_8G01660	Afu8G01660	Putative uncharacterized protein [Source:UniProtKB/TrEMBL
CADAFUAG00001654	6.47958	-2.6463	0.691551	-3.82661	0.000129919	0.000677301	AFUA_6G09785	Afu6G09785	Putative uncharacterized protein [Source:UniProtKB/TrEMBL
CADAFUAG00001615	32.3442	-2.64103	0.323686	-8.15923	3.37175e-16	9.1056e-15	AFUA_6G09790	Afu6G09790	LysM domain protein; putative [Source:UniProtKB/TrEMBL
CADAFUAG00003740	40.3117	-2.63902	0.304359	-8.67075	4.29297e-18	1.43424e-16	AFUA_2G00910	Afu2G00910	Pfs; NB-ARC and TPR domain protein [Source:UniProtKB/TrEMBL
CADAFUAG00001052	2.67867	-2.63104	1.19655	-2.19885	0.0278883	0.0689371	AFUA_7G01170	Afu7G01170	Putative uncharacterized protein [Source:UniProtKB/TrEMBL
CADAFUAG00002853	1058.68	-2.6295	0.267409	-9.83326	8.09525e-23	3.97485e-21	AFUA_5G02880	Afu5G02880	C6 transcription factor; putative [Source:UniProtKB/TrEMBL
CADAFUAG00002628	173.624	-2.6148	0.193977	-13.4799	2.05327e-41	2.8517e-39	AFUA_5G00930	Afu5G00930	Amino acid permease; putative [Source:UniProtKB/TrEMBL
CADAFUAG00004193	48.7883	-2.61422	0.554461	-4.71488	2.41859e-06	1.83413e-05	AFUA_2G12710	Afu2G12710	MFS monocarboxylate transporter; putative [Source:UniProtKB/TrEMBL
CADAFUAG00001057	947.522	-2.61153	0.243065	-10.7442	6.31203e-27	3.95907e-25	AFUA_7G00280	Afu7G00280	Putative uncharacterized protein [Source:UniProtKB/TrEMBL
CADAFUAG00001536	125.932	-2.58993	0.477364	-5.42548	5.77992e-08	5.76924e-07	AFUA_6G00230	Afu6G00230	NmrA-like family protein [Source:UniProtKB/TrEMBL
CADAFUAG00001126	1.87783	-2.58209	1.27763	-2.021	0.0432799	0.0981038
CADAFUAG00004435	1221.33	-2.57473	0.174564	-14.7495	3.09925e-49	5.57979e-47	AFUA_2G10370	Afu2G10370	Iron-sulfur cluster assembly accessory protein Isa2; putative [Source:UniProtKB/TrEMBL
CADAFUAG00009848	1.39731	-2.5722	1.29972	-1.97904	0.0478113	0.106366			8s_rRNA [Source:RNAMMER
CADAFUAG00004138	2773.18	-2.56543	0.182195	-14.0806	4.99505e-45	7.96096e-43	AFUA_2G12630	Afu2G12630	Allergen Asp f 15 [Source:UniProtKB/Swiss-Prot
CADAFUAG00003163	2.74962	-2.56535	1.39326	-1.84126	0.065583	0.137236	AFUA_8G06710	Afu8G06710	Putative uncharacterized protein [Source:UniProtKB/TrEMBL
CADAFUAG00000936	1.23206	-2.56351	1.59207	-1.61018	0.107359	0.204472	AFUA_8G02270	Afu8G02270	Dihydrodipicolinate synthetase family protein [Source:UniProtKB/TrEMBL
CADAFUAG00000232	67.6634	-2.56198	0.406278	-6.30597	2.86396e-10	3.92714e-09	AFUA_3G00320	Afu3G00320	Endo-1;4-beta-xylanase xynf11a [Source:UniProtKB/Swiss-Prot
CADAFUAG00005763	122.095	-2.55903	0.258202	-9.91096	3.73051e-23	1.88896e-21	AFUA_3G15080	Afu3G15080	Putative uncharacterized protein [Source:UniProtKB/TrEMBL
CADAFUAG00001540	444.471	-2.55183	0.129381	-19.7234	1.35796e-86	6.60106e-84	AFUA_6G00290	Afu6G00290	Aminotransferase; putative [Source:UniProtKB/TrEMBL
CADAFUAG00005384	85.337	-2.54867	0.252808	-10.0815	6.6718e-24	3.56391e-22	AFUA_3G10820	Afu3G10820	Ferric-chelate reductase; putative [Source:UniProtKB/TrEMBL
CADAFUAG00006893	50.4231	-2.54588	0.282206	-9.02135	1.85786e-19	6.92034e-18	AFUA_1G11715	Afu1G11715	Putative uncharacterized protein [Source:UniProtKB/TrEMBL
CADAFUAG00001625	0.835705	-2.54321	1.92973	-1.31791	0.187534	0.31402	AFUA_6G10200	Afu6G10200	Putative uncharacterized protein [Source:UniProtKB/TrEMBL
CADAFUAG00001557	1.99954	-2.54236	1.2471	-2.03862	0.0414881	0.0951056	AFUA_6G00340	Afu6G00340	Putative uncharacterized protein [Source:UniProtKB/TrEMBL
CADAFUAG00003586	31.4972	-2.54006	0.419918	-6.04895	1.45796e-09	1.85042e-08	AFUA_2G00980	Afu2G00980	Putative uncharacterized protein [Source:UniProtKB/TrEMBL
CADAFUAG00003651	1518.58	-2.53994	0.230945	-10.998	3.90695e-28	2.65618e-26	AFUA_2G00570	Afu2G00570	GNAT family acetyltransferase; putative [Source:UniProtKB/TrEMBL
CADAFUAG00005102	3.19647	-2.52895	1.07733	-2.34742	0.018904	0.0498197	AFUA_3G13570	Afu3G13570	Putative uncharacterized protein [Source:UniProtKB/TrEMBL
CADAFUAG00007893	20.9366	-2.52616	0.352345	-7.16956	7.52405e-13	1.40671e-11	AFUA_4G09300	Afu4G09300	Putative uncharacterized protein [Source:UniProtKB/TrEMBL
CADAFUAG00004106	0.47317	-2.52498	2.38107	-1.06044	0.288944	0.435676	AFUA_2G09420	Afu2G09420	F-box domain protein [Source:UniProtKB/TrEMBL
CADAFUAG00000104	1738.31	-2.51846	0.142752	-17.6422	1.16768e-69	3.66199e-67	AFUA_3G03350	Afu3G03350	Nonribosomal peptide synthetase 3 [Source:UniProtKB/Swiss-Prot
CADAFUAG00004788	11.5477	-2.51299	0.737211	-3.40879	0.000652528	0.00276301	AFUA_2G12770	Afu2G12770	Alpha-L-arabinofuranosidase; putative [Source:UniProtKB/TrEMBL
CADAFUAG00002886	0.872636	-2.51175	2.0162	-1.24578	0.212844	0.346437	AFUA_5G01130	Afu5G01130	Putative uncharacterized protein [Source:UniProtKB/TrEMBL
CADAFUAG00005352	1.01425	-2.48632	1.44346	-1.72248	0.0849831	0.169617	AFUA_3G13590	Afu3G13590	Putative uncharacterized protein [Source:UniProtKB/TrEMBL
CADAFUAG00000466	18.2848	-2.48538	0.517613	-4.80161	1.57397e-06	1.23404e-05	AFUA_6G03345	Afu6G03345	Putative uncharacterized protein [Source:UniProtKB/TrEMBL
CADAFUAG00003864	0.748801	-2.48095	2.30341	-1.07707	0.281447	0.427937	AFUA_2G00130	Afu2G00130	Solid-state culture specific protein; putative [Source:UniProtKB/TrEMBL
CADAFUAG00006921	83.1616	-2.47524	0.38062	-6.50318	7.86387e-11	1.17254e-09	AFUA_1G16760	Afu1G16760	Acetyltransferase; GNAT family family [Source:UniProtKB/TrEMBL
CADAFUAG00006642	5.67504	-2.47299	0.758677	-3.2596	0.00111568	0.00443263	AFUA_5G10090	Afu5G10090	3-demethylubiquinone-9 3-methyltransferase; putative [Source:UniProtKB/TrEMBL
CADAFUAG00001248	218.522	-2.44437	0.193968	-12.6019	2.06097e-36	2.2769e-34	AFUA_7G00850	Afu7G00850	GNAT family acetyltransferase; putative [Source:UniProtKB/TrEMBL
CADAFUAG00008168	2513.62	-2.4417	0.173715	-14.0558	7.09827e-45	1.11306e-42	AFUA_4G13570	Afu4G13570	Thiol methyltransferase; putative [Source:UniProtKB/TrEMBL
CADAFUAG00003768	9.14394	-2.43862	0.63888	-3.81702	0.000135074	0.000701117	AFUA_2G00920	Afu2G00920	Extracellular glycosyl hydrolase/cellulase; putative [Source:UniProtKB/TrEMBL
CADAFUAG00003466	266.367	-2.43557	0.166356	-14.6407	1.54363e-48	2.67984e-46	AFUA_2G01270	Afu2G01270	Ferric-chelate reductase; putative [Source:UniProtKB/TrEMBL
CADAFUAG00004821	17.4666	-2.42548	0.421531	-5.75397	8.7174e-09	9.82046e-08	AFUA_2G17540	Afu2G17540	Conidial pigment biosynthesis oxidase Abr1/brown 1 [Source:UniProtKB/TrEMBL
CADAFUAG00000069	16.7626	-2.4239	0.503945	-4.80985	1.51045e-06	1.19e-05	AFUA_3G02680	Afu3G02680	C6 finger domain protein; putative [Source:UniProtKB/TrEMBL
CADAFUAG00005342	417.888	-2.41622	0.309045	-7.81835	5.35201e-15	1.25682e-13	AFUA_3G15055	Afu3G15055	Putative uncharacterized protein [Source:UniProtKB/TrEMBL
CADAFUAG00004320	65.7054	-2.41327	0.324277	-7.44201	9.91665e-14	2.06445e-12	AFUA_2G12650	Afu2G12650	DUF636 domain protein [Source:UniProtKB/TrEMBL
CADAFUAG00009740	0.546336	-2.37877	2.23118	-1.06615	0.286357	0.433234	AFUA_8G04476	Afu8G04476
CADAFUAG00007975	11.5384	-2.37078	0.466036	-5.08711	3.63563e-07	3.2045e-06	AFUA_4G10560	Afu4G10560	Putative uncharacterized protein [Source:UniProtKB/TrEMBL
CADAFUAG00009865	98.6323	-2.35906	0.507117	-4.6519	3.28886e-06	2.43335e-05			U2 spliceosomal RNA [Source:RFAM
CADAFUAG00004879	1169.67	-2.35898	0.216323	-10.9049	1.09205e-27	7.27187e-26	AFUA_2G17520	Afu2G17520	GNAT family N-acetyltransferase; putative [Source:UniProtKB/TrEMBL
CADAFUAG00001807	4.43614	-2.3531	0.924438	-2.54544	0.0109142	0.0312449	AFUA_6G12120	Afu6G12120	BNR/Asp-box repeat domain protein [Source:UniProtKB/TrEMBL
CADAFUAG00002445	11.4403	-2.34998	0.531631	-4.42032	9.85537e-06	6.58062e-05	AFUA_4G00380	Afu4G00380	Putative uncharacterized protein [Source:UniProtKB/TrEMBL
CADAFUAG00009197	1284.32	-2.34285	1.87827	-1.24735	0.21227	0.345624	AFUA_1G00910	Afu1G00910	Putative uncharacterized protein [Source:UniProtKB/TrEMBL
CADAFUAG00009871	3.09823	-2.33408	1.09646	-2.12875	0.0332753	0.0793989			8s_rRNA [Source:RNAMMER
CADAFUAG00005709	73.2219	-2.33349	0.251566	-9.27587	1.76168e-20	7.25723e-19	AFUA_3G05660	Afu3G05660	MFS monocarboxylate transporter; putative [Source:UniProtKB/TrEMBL
CADAFUAG00003936	0.58166	-2.32258	2.06432	-1.12511	0.260543	0.402574	AFUA_2G10205	Afu2G10205	Putative uncharacterized protein [Source:UniProtKB/TrEMBL
CADAFUAG00000996	120.407	-2.31931	0.221824	-10.4556	1.38059e-25	8.18423e-24	AFUA_8G00720	Afu8G00720	Amino acid transporter; putative [Source:UniProtKB/TrEMBL
CADAFUAG00000147	0.433784	-2.30291	3.00059	-0.767486	0.442792	0.592582	AFUA_3G02540	Afu3G02540	Putative uncharacterized protein [Source:UniProtKB/TrEMBL
CADAFUAG00001086	75.3824	-2.30151	0.442403	-5.2023	1.96842e-07	1.81566e-06	AFUA_7G00970	Afu7G00970	GPI anchored serine-threonine rich protein [Source:UniProtKB/TrEMBL
CADAFUAG00009825	1.13564	-2.29124	1.69281	-1.35351	0.175891	0.29953	AFUA_1G14235	Afu1G14235
CADAFUAG00002590	611.92	-2.28721	0.220703	-10.3633	3.64247e-25	2.10787e-23	AFUA_5G00580	Afu5G00580	Putative uncharacterized protein [Source:UniProtKB/TrEMBL
CADAFUAG00003554	74.0886	-2.285	0.30977	-7.37643	1.62588e-13	3.32774e-12	AFUA_2G04330	Afu2G04330	Salicylate hydroxylase; putative [Source:UniProtKB/TrEMBL
CADAFUAG00000042	45.7099	-2.28164	0.252567	-9.03379	1.6583e-19	6.20077e-18	AFUA_3G01610	Afu3G01610	Putative uncharacterized protein [Source:UniProtKB/TrEMBL
CADAFUAG00003110	883.221	-2.28115	0.225162	-10.1311	4.01958e-24	2.17102e-22	AFUA_8G04870	Afu8G04870	NAD binding Rossmann fold oxidoreductase; putative [Source:UniProtKB/TrEMBL
CADAFUAG00000416	147.326	-2.27726	0.17122	-13.3002	2.30871e-40	3.07469e-38	AFUA_6G05000	Afu6G05000	Glycosyl hydrolases family 32 superfamily [Source:UniProtKB/TrEMBL
CADAFUAG00000800	15.8109	-2.27638	0.553735	-4.11095	3.94038e-05	0.000231331	AFUA_8G00660	Afu8G00660	Solute transporter; putative [Source:UniProtKB/TrEMBL
CADAFUAG00001620	175.452	-2.26845	0.734211	-3.08964	0.00200397	0.00736304	AFUA_6G07820	Afu6G07820	Integral membrane protein; putative [Source:UniProtKB/TrEMBL
CADAFUAG00004562	223.671	-2.25176	0.173497	-12.9787	1.61623e-38	1.98899e-36	AFUA_2G10420	Afu2G10420	Branched-chain-amino-acid aminotransferase [Source:UniProtKB/TrEMBL
CADAFUAG00009546	82.0172	-2.24414	0.296755	-7.56227	3.96088e-14	8.57632e-13	AFUA_7G05570	Afu7G05570	Putative uncharacterized protein [Source:UniProtKB/TrEMBL
CADAFUAG00003509	17.3097	-2.24083	0.429391	-5.21862	1.80261e-07	1.67703e-06	AFUA_2G00560	Afu2G00560	Putative uncharacterized protein [Source:UniProtKB/TrEMBL
CADAFUAG00000959	1034.79	-2.23933	0.183529	-12.2015	3.05084e-34	2.93666e-32	AFUA_8G01860	Afu8G01860	NmrA-like family protein [Source:UniProtKB/TrEMBL
CADAFUAG00009159	12.7753	-2.23738	0.441203	-5.07109	3.95548e-07	3.45866e-06	AFUA_1G01980	Afu1G01980	IgE binding protein; putative [Source:UniProtKB/TrEMBL
CADAFUAG00000864	342.316	-2.23545	0.268238	-8.33382	7.82747e-17	2.23163e-15	AFUA_8G01870	Afu8G01870	Putative uncharacterized protein [Source:UniProtKB/TrEMBL
CADAFUAG00006147	634.589	-2.22163	0.138968	-15.9866	1.5833e-57	3.49836e-55	AFUA_5G08480	Afu5G08480	Serine/threonine protein kinase; putative [Source:UniProtKB/TrEMBL
CADAFUAG00000846	75.7093	-2.21839	0.268188	-8.27176	1.31993e-16	3.68745e-15	AFUA_8G00680	Afu8G00680	Glycosyl transferase; putative [Source:UniProtKB/TrEMBL
CADAFUAG00001516	2.44607	-2.21328	1.11465	-1.98563	0.0470747	0.105113	AFUA_6G00260	Afu6G00260	Phosphatidylserine decarboxylase family protein [Source:UniProtKB/TrEMBL
CADAFUAG00003050	36.3819	-2.20899	0.291432	-7.57976	3.46189e-14	7.52941e-13	AFUA_8G07300	Afu8G07300	Alpha/beta hydrolase; putative [Source:UniProtKB/TrEMBL
CADAFUAG00000794	61.6752	-2.20851	0.354363	-6.23233	4.59545e-10	6.2311e-09	AFUA_8G02315	Afu8G02315	Putative uncharacterized protein [Source:UniProtKB/TrEMBL
CADAFUAG00001185	0.729328	-2.20139	1.87699	-1.17283	0.240862	0.379708	AFUA_7G01118	Afu7G01118	Putative uncharacterized protein [Source:UniProtKB/TrEMBL
CADAFUAG00000096	47.7164	-2.19989	0.327279	-6.72175	1.79559e-11	2.88541e-10	AFUA_3G02800	Afu3G02800	Lipase/esterase; putative [Source:UniProtKB/TrEMBL
CADAFUAG00002469	10.1582	-2.19909	0.614337	-3.57962	0.000344097	0.00159757	AFUA_4G01270	Afu4G01270	Integral membrane protein [Source:UniProtKB/TrEMBL
CADAFUAG00001573	18.5385	-2.19868	0.515954	-4.26138	2.03166e-05	0.000127761	AFUA_6G11930	Afu6G11930	Putative uncharacterized protein [Source:UniProtKB/TrEMBL
CADAFUAG00000249	52.2229	-2.19713	0.224725	-9.77697	1.41373e-22	6.83797e-21	AFUA_3G01240	Afu3G01240	Putative uncharacterized protein [Source:UniProtKB/TrEMBL
CADAFUAG00000816	310.103	-2.19626	0.171181	-12.8301	1.11267e-37	1.3033e-35	AFUA_8G00650	Afu8G00650	LPS glycosyltransferase; putative [Source:UniProtKB/TrEMBL
CADAFUAG00000008	53.1419	-2.18763	0.240708	-9.08832	1.0058e-19	3.81969e-18	AFUA_3G02060	Afu3G02060	MFS multidrug transporter; putative [Source:UniProtKB/TrEMBL
CADAFUAG00006165	51.3221	-2.18669	0.282828	-7.73152	1.06271e-14	2.41395e-13	AFUA_5G14030	Afu5G14030	Endo-1;3(4)-beta-glucanase; putative [Source:UniProtKB/TrEMBL
CADAFUAG00001846	4.75082	-2.18015	0.758481	-2.87436	0.00404849	0.0134977	AFUA_6G07240	Afu6G07240	4-hydroxybenzoate polyprenyl transferase; putative [Source:UniProtKB/TrEMBL
CADAFUAG00004067	13.0053	-2.17247	0.774888	-2.8036	0.00505362	0.0163064	AFUA_2G12690	Afu2G12690	Putative uncharacterized protein [Source:UniProtKB/TrEMBL
CADAFUAG00002583	600.245	-2.17009	0.167694	-12.9408	2.64834e-38	3.2184e-36	AFUA_5G00920	Afu5G00920	Transesterase (LovD); putative [Source:UniProtKB/TrEMBL
CADAFUAG00002235	660.469	-2.16104	0.241394	-8.95235	3.47994e-19	1.26239e-17	AFUA_6G12190	Afu6G12190	Putative uncharacterized protein [Source:UniProtKB/TrEMBL
CADAFUAG00001011	32.9854	-2.16036	0.3657	-5.90746	3.47423e-09	4.22206e-08	AFUA_8G00170	Afu8G00170	Nonribosomal peptide synthetase 13 [Source:UniProtKB/Swiss-Prot
CADAFUAG00002667	404.013	-2.1588	0.297288	-7.26167	3.82346e-13	7.52225e-12	AFUA_5G00770	Afu5G00770	Integral membrane protein; putative [Source:UniProtKB/TrEMBL
CADAFUAG00006577	0.28081	-2.15677	3.77116	-0.571913	0.567381	0.703223
CADAFUAG00002846	103.943	-2.14671	0.31289	-6.86091	6.84252e-12	1.15491e-10	AFUA_5G00800	Afu5G00800	Putative uncharacterized protein [Source:UniProtKB/TrEMBL
CADAFUAG00000262	13.6264	-2.14636	0.428319	-5.01113	5.41127e-07	4.61882e-06	AFUA_3G02550	Afu3G02550	Putative uncharacterized protein [Source:UniProtKB/TrEMBL
CADAFUAG00003047	2.05987	-2.13756	1.14218	-1.87147	0.0612794	0.129936	AFUA_8G06970	Afu8G06970	Beta-glucosidase [Source:UniProtKB/TrEMBL
CADAFUAG00006749	1.07	-2.13024	1.65177	-1.28967	0.197166	0.326382	AFUA_5G14620	Afu5G14620	Putative uncharacterized protein [Source:UniProtKB/TrEMBL
CADAFUAG00009868	138.774	-2.12834	0.394936	-5.38907	7.08237e-08	6.96911e-07			U2 spliceosomal RNA [Source:RFAM
CADAFUAG00009764	0.275634	-2.12574	3.77304	-0.563401	0.573162	0.7084	AFUA_2G15835	Afu2G15835
CADAFUAG00002521	766.657	-2.11926	0.208779	-10.1507	3.28952e-24	1.78663e-22	AFUA_5G02870	Afu5G02870	Oxidoreductase; short-chain dehydrogenase/reductase family [Source:UniProtKB/TrEMBL
CADAFUAG00002474	1.98787	-2.10954	1.48284	-1.42264	0.154842	0.271679	AFUA_4G00100	Afu4G00100	Rhamnogalacturonase; putative [Source:UniProtKB/TrEMBL
CADAFUAG00002866	289.022	-2.10947	0.167863	-12.5666	3.22361e-36	3.48222e-34	AFUA_5G01610	Afu5G01610	Putative uncharacterized protein [Source:UniProtKB/TrEMBL
CADAFUAG00007791	0.765108	-2.10837	2.1654	-0.973667	0.330222	0.481096	AFUA_4G10900	Afu4G10900	Putative uncharacterized protein [Source:UniProtKB/TrEMBL
CADAFUAG00000713	113.88	-2.10714	0.530568	-3.97148	7.14266e-05	0.000394534	AFUA_6G04280	Afu6G04280	Integral membrane protein [Source:UniProtKB/TrEMBL
CADAFUAG00003668	222.114	-2.09838	0.275334	-7.62122	2.51293e-14	5.51483e-13	AFUA_2G01710	Afu2G01710	GPI anchored protein; putative [Source:UniProtKB/TrEMBL
CADAFUAG00007647	26.419	-2.09793	0.363786	-5.76693	8.07298e-09	9.14749e-08	AFUA_1G17050	Afu1G17050	Putative uncharacterized protein [Source:UniProtKB/TrEMBL
CADAFUAG00005217	236.527	-2.09105	0.337471	-6.19625	5.78236e-10	7.74327e-09	AFUA_3G13620	Afu3G13620	Cupin domain protein [Source:UniProtKB/TrEMBL
CADAFUAG00004213	11.7373	-2.08967	0.463751	-4.50602	6.60559e-06	4.56754e-05	AFUA_2G15920	Afu2G15920	Putative uncharacterized protein [Source:UniProtKB/TrEMBL
CADAFUAG00009290	388.898	-2.08778	0.152439	-13.6958	1.07537e-42	1.58405e-40	AFUA_1G02970	Afu1G02970	Salicylate hydroxylase; putative [Source:UniProtKB/TrEMBL
CADAFUAG00001041	4.19902	-2.08304	0.974193	-2.13822	0.0324988	0.0780516	AFUA_7G00810	Afu7G00810	Putative uncharacterized protein [Source:UniProtKB/TrEMBL
CADAFUAG00004592	14.7837	-2.08181	0.551566	-3.77436	0.000160418	0.000816108	AFUA_2G12740	Afu2G12740	Methyltransferase; putative [Source:UniProtKB/TrEMBL
CADAFUAG00007474	59.8868	-2.07871	0.220567	-9.4244	4.32552e-21	1.86074e-19	AFUA_1G11250	Afu1G11250	Amidohydrolase; putative [Source:UniProtKB/TrEMBL
CADAFUAG00002472	299.29	-2.06241	0.136088	-15.155	7.02124e-52	1.42209e-49	AFUA_4G00930	Afu4G00930	CorA family metal ion transporter; putative [Source:UniProtKB/TrEMBL
CADAFUAG00000166	10880.5	-2.05967	0.241048	-8.54464	1.28938e-17	4.05676e-16	AFUA_3G03320	Afu3G03320	MFS monocarboxylate transporter; putative [Source:UniProtKB/TrEMBL
CADAFUAG00000915	730.565	-2.05863	0.314071	-6.55468	5.57606e-11	8.41778e-10	AFUA_8G01850	Afu8G01850	Phosphate-repressible phosphate permease; putative [Source:UniProtKB/TrEMBL
CADAFUAG00006810	35.7715	-2.05614	0.347073	-5.92422	3.13775e-09	3.84196e-08	AFUA_5G14760	Afu5G14760	Putative uncharacterized protein [Source:UniProtKB/TrEMBL
CADAFUAG00000916	206.113	-2.05609	0.294356	-6.98503	2.84801e-12	5.00694e-11	AFUA_8G01750	Afu8G01750	Acyl-CoA oxidase; putative [Source:UniProtKB/TrEMBL
CADAFUAG00006288	14.4134	-2.0526	0.524152	-3.91604	9.00161e-05	0.00048484	AFUA_5G12750	Afu5G12750	Putative uncharacterized protein [Source:UniProtKB/TrEMBL
CADAFUAG00002851	7726.46	-2.05213	0.42756	-4.79963	1.5896e-06	1.24429e-05	AFUA_5G01620	Afu5G01620	Extracellular proline-rich protein [Source:UniProtKB/TrEMBL
CADAFUAG00000043	31.6977	-2.04558	0.382114	-5.35332	8.63572e-08	8.40918e-07	AFUA_3G02990	Afu3G02990	Putative uncharacterized protein [Source:UniProtKB/TrEMBL
CADAFUAG00002473	158.221	-2.04373	0.40713	-5.01985	5.17126e-07	4.43733e-06	AFUA_4G00860	Afu4G00860	Cell surface protein; putative [Source:UniProtKB/TrEMBL
CADAFUAG00002719	33.8012	-2.04347	0.432522	-4.72454	2.30636e-06	1.75725e-05	AFUA_5G03540	Afu5G03540	Thioredoxin reductase; putative [Source:UniProtKB/TrEMBL
CADAFUAG00004624	6.31763	-2.03989	0.7771	-2.625	0.008665	0.0258055	AFUA_2G14170	Afu2G14170	Putative uncharacterized protein [Source:UniProtKB/TrEMBL
CADAFUAG00003521	179.036	-2.03936	0.150626	-13.5392	9.1828e-42	1.31287e-39	AFUA_2G05370	Afu2G05370	Putative uncharacterized protein [Source:UniProtKB/TrEMBL
CADAFUAG00004922	122.389	-2.03862	0.187163	-10.8922	1.25567e-27	8.13839e-26	AFUA_3G07960	Afu3G07960	Alpha-ketoglutarate-dependent taurine dioxygenase [Source:UniProtKB/TrEMBL
CADAFUAG00001223	6.80828	-2.03667	0.951675	-2.14009	0.0323478	0.077766	AFUA_7G01020	Afu7G01020	Putative uncharacterized protein [Source:UniProtKB/TrEMBL
CADAFUAG00008522	379.603	-2.03615	0.197877	-10.2899	7.82213e-25	4.47334e-23	AFUA_4G13580	Afu4G13580	Gamma-glutamyltranspeptidase [Source:UniProtKB/TrEMBL
CADAFUAG00009770	0.822789	-2.03352	2.00779	-1.01281	0.311149	0.461057	AFUA_2G14625	Afu2G14625
CADAFUAG00009686	115.205	-2.0231	0.3639	-5.55949	2.70571e-08	2.81036e-07	AFUA_7G04570	Afu7G04570	Na/K ATPase alpha 1 subunit; putative [Source:UniProtKB/TrEMBL
CADAFUAG00000112	42.3949	-2.02077	1.12689	-1.79323	0.0729366	0.149345	AFUA_3G03530	Afu3G03530	Nitroreductase family protein [Source:UniProtKB/TrEMBL
CADAFUAG00008531	67.363	-2.01663	0.212363	-9.49613	2.17838e-21	9.75955e-20	AFUA_4G09180	Afu4G09180	SET domain protein [Source:UniProtKB/TrEMBL
CADAFUAG00001004	3.92149	-2.01433	0.85438	-2.35765	0.0183909	0.0487183	AFUA_8G01050	Afu8G01050	Lipase/esterase; putative [Source:UniProtKB/TrEMBL
CADAFUAG00009811	0.298443	-2.01362	3.77901	-0.532842	0.594143	0.726025	AFUA_5G09813	Afu5G09813
CADAFUAG00003173	9.60641	-2.01294	0.616213	-3.26663	0.00108835	0.00434	AFUA_8G07020	Afu8G07020	Salicylate hydroxylase; putative [Source:UniProtKB/TrEMBL
CADAFUAG00003812	1383.16	-2.00983	0.221042	-9.09254	9.67528e-20	3.68875e-18	AFUA_2G04310	Afu2G04310	Argininosuccinate synthase [Source:UniProtKB/TrEMBL
CADAFUAG00007177	78.0206	-2.00809	0.337492	-5.95004	2.68078e-09	3.31584e-08	AFUA_1G12475	Afu1G12475	Putative uncharacterized protein [Source:UniProtKB/TrEMBL
CADAFUAG00001278	0.237744	-1.99846	3.43365	-0.582022	0.560552	0.697604	AFUA_4G03190	Afu4G03190	Alpha;alpha-trehalose-phosphate synthase subunit; putative [Source:UniProtKB/TrEMBL
CADAFUAG00002691	560.175	-1.99762	0.806262	-2.47763	0.0132258	0.0369062	AFUA_5G01360	Afu5G01360	Cytochrome P450; putative [Source:UniProtKB/TrEMBL
CADAFUAG00007352	913.804	-1.99448	0.134443	-14.8352	8.68085e-50	1.62298e-47	AFUA_1G16560	Afu1G16560	MIF domain protein [Source:UniProtKB/TrEMBL
CADAFUAG00004453	21.3663	-1.98963	0.34866	-5.70651	1.15316e-08	1.2757e-07	AFUA_2G08120	Afu2G08120	MFS monosaccharide transporter (Hxt8); putative [Source:UniProtKB/TrEMBL
CADAFUAG00002005	3.24211	-1.98588	0.880303	-2.2559	0.0240766	0.0608139	AFUA_6G11800	Afu6G11800	RTA1 domain protein; putative [Source:UniProtKB/TrEMBL
CADAFUAG00009688	0.950699	-1.97523	1.63901	-1.20513	0.228152	0.36572	AFUA_3G02005	Afu3G02005
CADAFUAG00001264	1.67769	-1.97217	1.07163	-1.84035	0.0657175	0.137323	AFUA_7G00880	Afu7G00880	Putative uncharacterized protein [Source:UniProtKB/TrEMBL
CADAFUAG00006349	632.556	-1.97168	0.270736	-7.28265	3.27315e-13	6.4942e-12	AFUA_5G11700	Afu5G11700	DNA mismatch repair protein Mlh1; putative [Source:UniProtKB/TrEMBL
CADAFUAG00009634	3489.29	-1.97076	0.208529	-9.45076	3.36373e-21	1.47307e-19	AFUA_7G04700	Afu7G04700	Conserved hypothetical portein [Source:UniProtKB/TrEMBL
CADAFUAG00002451	6.85478	-1.97072	0.746837	-2.63876	0.00832109	0.0248763	AFUA_4G00470	Afu4G00470	MFS multidrug transporter; putative [Source:UniProtKB/TrEMBL
CADAFUAG00003826	90.1834	-1.96679	0.237401	-8.2847	1.18408e-16	3.33672e-15	AFUA_2G01970	Afu2G01970	Putative uncharacterized protein [Source:UniProtKB/TrEMBL
CADAFUAG00000974	3.23315	-1.96481	1.02447	-1.91788	0.055126	0.119123	AFUA_8G01210	Afu8G01210	Enoyl-CoA hydratase/isomerase family protein [Source:UniProtKB/TrEMBL
CADAFUAG00008482	2.24247	-1.96168	1.05346	-1.86212	0.0625862	0.132188	AFUA_4G09260	Afu4G09260	Putative uncharacterized protein [Source:UniProtKB/TrEMBL
CADAFUAG00009414	29.136	-1.96061	0.58117	-3.37356	0.000742037	0.00310417	AFUA_7G05120	Afu7G05120	Integral membrane protein (Pth11); putative [Source:UniProtKB/TrEMBL
CADAFUAG00005013	166.265	-1.96007	0.3744	-5.23522	1.64789e-07	1.53898e-06	AFUA_3G14910	Afu3G14910	FacC-like extracellular signaling protein; putative [Source:UniProtKB/TrEMBL
CADAFUAG00002917	23.2482	-1.95898	0.338544	-5.78647	7.18799e-09	8.26024e-08	AFUA_5G01350	Afu5G01350	MFS multidrug transporter; putative [Source:UniProtKB/TrEMBL
CADAFUAG00001658	2.07178	-1.95658	1.18769	-1.64739	0.0994776	0.192532	AFUA_6G11820	Afu6G11820	Glycosyl hydrolase family protein [Source:UniProtKB/TrEMBL
CADAFUAG00000795	45.6763	-1.95565	0.302933	-6.4557	1.07717e-10	1.55606e-09	AFUA_8G01250	Afu8G01250	GNAT family acetyltransferase; putative [Source:UniProtKB/TrEMBL
CADAFUAG00008727	20.3082	-1.95168	0.37764	-5.16809	2.36494e-07	2.15887e-06	AFUA_1G05600	Afu1G05600	Putative uncharacterized protein [Source:UniProtKB/TrEMBL
CADAFUAG00007191	4.81762	-1.9493	0.755451	-2.58031	0.00987127	0.0288021	AFUA_1G17520	Afu1G17520	D-lactate dehydrogenase (Cytochrome); putative [Source:UniProtKB/TrEMBL
CADAFUAG00000193	146.218	-1.93586	0.346764	-5.58265	2.36877e-08	2.48427e-07	AFUA_3G02900	Afu3G02900	Oxidoreductase; short chain dehydrogenase/reductase family [Source:UniProtKB/TrEMBL
CADAFUAG00004178	5.62193	-1.93576	0.694981	-2.78535	0.00534706	0.0171169	AFUA_2G07740	Afu2G07740	Putative uncharacterized protein [Source:UniProtKB/TrEMBL
CADAFUAG00004752	120.066	-1.9328	0.395914	-4.88186	1.05088e-06	8.52097e-06	AFUA_2G17300	Afu2G17300	Glutathione S-transferase [Source:UniProtKB/TrEMBL
CADAFUAG00009352	0.477989	-1.93228	3.78578	-0.510405	0.609768	0.73908	AFUA_7G06990	Afu7G06990	GDP-D-mannose dehydratase; putative [Source:UniProtKB/TrEMBL
CADAFUAG00001326	218	-1.92956	0.170263	-11.3329	9.02142e-30	6.64441e-28	AFUA_4G04318	Afu4G04318	Copper resistance protein Crd2; putative [Source:UniProtKB/TrEMBL
CADAFUAG00009006	6.04353	-1.92728	1.15449	-1.66938	0.0950423	0.185555	AFUA_1G01265	Afu1G01265	Putative uncharacterized protein [Source:UniProtKB/TrEMBL
CADAFUAG00005985	419.615	-1.91894	0.210966	-9.09596	9.37567e-20	3.58859e-18	AFUA_5G10490	Afu5G10490	Amidase; putative [Source:UniProtKB/TrEMBL
CADAFUAG00004457	733.52	-1.91874	0.240706	-7.97131	1.56996e-15	3.88375e-14	AFUA_2G13295	Afu2G13295	Aminotransferase family protein (LolT); putative [Source:UniProtKB/TrEMBL
CADAFUAG00009794	1.5527	-1.91633	1.34838	-1.4212	0.155257	0.272162	AFUA_5G06056	Afu5G06056
CADAFUAG00002489	20.1539	-1.91497	0.554119	-3.45588	0.000548497	0.00238697	AFUA_4G01090	Afu4G01090	Zn2+ dependent hydrolase; putative [Source:UniProtKB/TrEMBL
CADAFUAG00008689	10.9059	-1.91093	0.445453	-4.28985	1.78793e-05	0.000113609	AFUA_1G07190	Afu1G07190	Ankyrin repeat protein [Source:UniProtKB/TrEMBL
CADAFUAG00002133	28.4008	-1.91001	0.337667	-5.65649	1.545e-08	1.67266e-07	AFUA_6G11870	Afu6G11870	Putative uncharacterized protein [Source:UniProtKB/TrEMBL
CADAFUAG00000323	2837.92	-1.9063	0.109013	-17.4869	1.80198e-68	5.47464e-66	AFUA_3G03400	Afu3G03400	Siderophore biosynthesis acetylase AceI; putative [Source:UniProtKB/TrEMBL
CADAFUAG00002852	5.4465	-1.90624	0.772653	-2.46714	0.0136198	0.0378412	AFUA_5G04400	Afu5G04400	Putative uncharacterized protein [Source:UniProtKB/TrEMBL
CADAFUAG00001908	12.0172	-1.90373	0.63277	-3.00857	0.00262479	0.00933366	AFUA_6G12060	Afu6G12060	MAK1-like monooxygenase; putative [Source:UniProtKB/TrEMBL
CADAFUAG00009823	531.479	-1.89864	0.310704	-6.11077	9.91547e-10	1.28875e-08	AFUA_1G11805	Afu1G11805
CADAFUAG00006589	20.2792	-1.89773	0.507552	-3.73899	0.000184764	0.000922586	AFUA_5G12700	Afu5G12700	Putative uncharacterized protein [Source:UniProtKB/TrEMBL
CADAFUAG00000217	159.457	-1.89637	0.188322	-10.0698	7.5112e-24	3.99038e-22	AFUA_3G01190	Afu3G01190	Serine/threonine protein kinase; putative [Source:UniProtKB/TrEMBL
CADAFUAG00002126	3.85141	-1.89543	0.809113	-2.3426	0.0191501	0.0503317	AFUA_6G09745	Afu6G09745	Putative uncharacterized protein [Source:UniProtKB/TrEMBL
CADAFUAG00008571	1010.94	-1.89169	0.162603	-11.6338	2.77547e-31	2.21173e-29	AFUA_4G10090	Afu4G10090	GABA permease; putative [Source:UniProtKB/TrEMBL
CADAFUAG00006575	112.397	-1.89111	0.192044	-9.84731	7.04022e-23	3.49209e-21	AFUA_5G08150	Afu5G08150	ABC bile acid transporter; putative [Source:UniProtKB/TrEMBL
CADAFUAG00003258	0.992294	-1.88889	1.72426	-1.09548	0.273306	0.418043	AFUA_8G07350	Afu8G07350	Dioxygenase; putative [Source:UniProtKB/TrEMBL
CADAFUAG00009856	141.023	-1.88883	0.377549	-5.00287	5.6483e-07	4.79587e-06			U1 spliceosomal RNA [Source:RFAM
CADAFUAG00006665	5.75239	-1.88295	0.8654	-2.17582	0.0295689	0.0722284	AFUA_5G12710	Afu5G12710	TPR domain protein [Source:UniProtKB/TrEMBL
CADAFUAG00006764	148.949	-1.88245	0.337363	-5.5799	2.40652e-08	2.52114e-07	AFUA_5G07650	Afu5G07650	F-box domain and ankyrin repeat protein [Source:UniProtKB/TrEMBL
CADAFUAG00005382	0.521394	-1.88006	2.04553	-0.919106	0.35804	0.509159	AFUA_3G14360	Afu3G14360	Putative uncharacterized protein [Source:UniProtKB/TrEMBL
CADAFUAG00003775	6.62113	-1.87702	0.67216	-2.79252	0.0052299	0.0167806	AFUA_2G00270	Afu2G00270	Putative uncharacterized protein [Source:UniProtKB/TrEMBL
CADAFUAG00002392	10.1446	-1.87192	0.543245	-3.44582	0.000569336	0.00246772	AFUA_4G01040	Afu4G01040	Short chain dehydrogenase; putative [Source:UniProtKB/TrEMBL
CADAFUAG00004412	293.71	-1.87055	0.651834	-2.86968	0.00410893	0.0136585	AFUA_2G10130	Afu2G10130	Adhesin; putative [Source:UniProtKB/TrEMBL
CADAFUAG00002393	0.713158	-1.866	2.25426	-0.827767	0.407803	0.559822	AFUA_4G00160	Afu4G00160	Short-chain dehydrogenase; putative [Source:UniProtKB/TrEMBL
CADAFUAG00002415	28.375	-1.86509	0.464828	-4.01243	6.00973e-05	0.000338901	AFUA_4G01120	Afu4G01120	Putative uncharacterized protein [Source:UniProtKB/TrEMBL
CADAFUAG00006958	1.88329	-1.85829	1.05134	-1.76755	0.0771368	0.156462	AFUA_1G11020	Afu1G11020	L-arabinitol 4-dehydrogenase [Source:UniProtKB/TrEMBL
CADAFUAG00005306	589.19	-1.85627	0.26993	-6.87686	6.11882e-12	1.04181e-10	AFUA_3G06850	Afu3G06850	Putative uncharacterized protein [Source:UniProtKB/TrEMBL
CADAFUAG00003332	257.716	-1.85296	0.41948	-4.41728	9.99511e-06	6.66935e-05	AFUA_2G04380	Afu2G04380	LaeA-like methyltransferase; putative [Source:UniProtKB/TrEMBL
CADAFUAG00007396	268.261	-1.85284	0.320779	-5.77606	7.64694e-09	8.71554e-08	AFUA_1G16556	Afu1G16556	ADP-ribose 1''-phosphate phosphatase [Source:UniProtKB/Swiss-Prot
CADAFUAG00000964	664.28	-1.85059	0.212787	-8.69687	3.41149e-18	1.14763e-16	AFUA_8G00830	Afu8G00830	Putative uncharacterized protein [Source:UniProtKB/TrEMBL
CADAFUAG00005167	54.3008	-1.84926	0.393919	-4.69453	2.67222e-06	2.00612e-05	AFUA_3G14915	Afu3G14915
CADAFUAG00004649	198.502	-1.84271	0.257709	-7.15036	8.65531e-13	1.60586e-11	AFUA_2G16990	Afu2G16990	Putative uncharacterized protein [Source:UniProtKB/TrEMBL
CADAFUAG00004117	59.1015	-1.8388	0.340855	-5.39465	6.86564e-08	6.76955e-07	AFUA_2G08830	Afu2G08830	Nickel transport protein; putative [Source:UniProtKB/TrEMBL
CADAFUAG00004318	90.5241	-1.83755	0.433524	-4.23863	2.2489e-05	0.000140422	AFUA_2G12000	Afu2G12000	Putative uncharacterized protein [Source:UniProtKB/TrEMBL
CADAFUAG00004018	273.592	-1.83612	0.236512	-7.76334	8.27194e-15	1.91476e-13	AFUA_2G10070	Afu2G10070	Carbamoyl-phosphate synthase; large subunit [Source:UniProtKB/TrEMBL
CADAFUAG00001338	145.697	-1.83564	0.143214	-12.8175	1.30935e-37	1.51542e-35	AFUA_4G04540	Afu4G04540	C4-dicarboxylate transporter/malic acid transport protein; putative [Source:UniProtKB/TrEMBL
CADAFUAG00005699	7.63976	-1.83437	0.527488	-3.47756	0.000506008	0.00222095	AFUA_3G08570	Afu3G08570	Putative uncharacterized protein [Source:UniProtKB/TrEMBL
CADAFUAG00009746	0.701188	-1.83427	1.76105	-1.04158	0.297607	0.445677	AFUA_2G05999	Afu2G05999
CADAFUAG00003752	1.21001	-1.83121	1.39989	-1.30811	0.190835	0.31867	AFUA_2G00510	Afu2G00510	Cellulose-binding GDSL lipase/acylhydrolase; putative [Source:UniProtKB/TrEMBL
CADAFUAG00008554	78.4609	-1.83079	0.319751	-5.72566	1.03034e-08	1.14795e-07	AFUA_4G09255	Afu4G09255	Putative uncharacterized protein [Source:UniProtKB/TrEMBL
CADAFUAG00003090	36.7984	-1.82977	0.405033	-4.51758	6.25504e-06	4.34989e-05	AFUA_8G07170	Afu8G07170	Putative uncharacterized protein [Source:UniProtKB/TrEMBL
CADAFUAG00009878	9.38207	-1.81946	0.576692	-3.15499	0.00160501	0.00606448			8s_rRNA [Source:RNAMMER
CADAFUAG00004006	212.951	-1.81749	0.367614	-4.94401	7.65305e-07	6.3455e-06	AFUA_2G12830	Afu2G12830	UDP-glucosyl transferase family protein [Source:UniProtKB/TrEMBL
CADAFUAG00000313	206.344	-1.81595	0.250628	-7.24559	4.30563e-13	8.33851e-12	AFUA_3G01410	Afu3G01410	Polyketide synthase; putative [Source:UniProtKB/TrEMBL
CADAFUAG00000773	19.0201	-1.81562	0.380009	-4.77782	1.77209e-06	1.37277e-05	AFUA_8G00710	Afu8G00710	Secreted antimicrobial peptide; putative [Source:UniProtKB/TrEMBL
CADAFUAG00004037	97.5027	-1.81373	0.402702	-4.5039	6.67177e-06	4.61001e-05	AFUA_2G18030	Afu2G18030	Catalase [Source:UniProtKB/TrEMBL
CADAFUAG00006516	233.413	-1.81075	0.195608	-9.25703	2.102e-20	8.5505e-19	AFUA_5G10040	Afu5G10040	C6 transcription factor; putative [Source:UniProtKB/TrEMBL
CADAFUAG00002366	24.1002	-1.81049	0.518758	-3.49003	0.000482957	0.0021352	AFUA_6G13860	Afu6G13860	Putative uncharacterized protein [Source:UniProtKB/TrEMBL
CADAFUAG00000529	2557.03	-1.80639	0.186317	-9.69524	3.15881e-22	1.48357e-20	AFUA_6G04360	Afu6G04360	ABC drug exporter AtrF [Source:UniProtKB/TrEMBL
CADAFUAG00001035	18.9983	-1.79821	0.433247	-4.15053	3.31699e-05	0.00019943	AFUA_7G01050	Afu7G01050	Salicylate hydroxylase; putative [Source:UniProtKB/TrEMBL
CADAFUAG00002899	142.49	-1.79796	0.311048	-5.78033	7.45524e-09	8.52704e-08	AFUA_5G01600	Afu5G01600	PHP domain protein [Source:UniProtKB/TrEMBL
CADAFUAG00006734	148.321	-1.79415	0.422999	-4.2415	2.22033e-05	0.000138817	AFUA_5G09960	Afu5G09960	GPI anchored protein; putative [Source:UniProtKB/TrEMBL
CADAFUAG00006402	474.983	-1.79184	0.400017	-4.4794	7.48524e-06	5.11755e-05	AFUA_5G10050	Afu5G10050	Cytochrome P450 monooxygenase; putative [Source:UniProtKB/TrEMBL
CADAFUAG00005960	1653.27	-1.79119	0.211214	-8.48045	2.24327e-17	6.81533e-16	AFUA_5G06010	Afu5G06010	Eukaryotic translation initiation factor 6 [Source:UniProtKB/TrEMBL
CADAFUAG00006731	183.364	-1.7909	0.226296	-7.91396	2.49337e-15	5.97057e-14	AFUA_5G13840	Afu5G13840	NUDIX domain; putative [Source:UniProtKB/TrEMBL
CADAFUAG00002428	3.8365	-1.78702	0.742049	-2.40822	0.0160307	0.0433038	AFUA_4G01115	Afu4G01115	Putative uncharacterized protein [Source:UniProtKB/TrEMBL
CADAFUAG00001607	21.2388	-1.78297	0.458626	-3.88763	0.000101226	0.000540133	AFUA_6G08490	Afu6G08490	Inorganic diphosphatase; putative [Source:UniProtKB/TrEMBL
CADAFUAG00000117	15.1697	-1.78295	0.545687	-3.26734	0.00108562	0.00433088	AFUA_3G02770	Afu3G02770	FAD binding domain protein [Source:UniProtKB/TrEMBL
CADAFUAG00008279	462.982	-1.77851	0.347656	-5.11572	3.12541e-07	2.78693e-06	AFUA_4G10620	Afu4G10620	Probable 4-hydroxyphenylpyruvate dioxygenase 2 [Source:UniProtKB/Swiss-Prot
CADAFUAG00000263	1.15709	-1.77572	1.64216	-1.08133	0.279549	0.425771	AFUA_3G03180	Afu3G03180	NAD binding Rossmann fold oxidoreductase; putative [Source:UniProtKB/TrEMBL
CADAFUAG00004991	25881.7	-1.7751	0.19222	-9.2347	2.59014e-20	1.04055e-18	AFUA_3G06260	Afu3G06260	Translation initiation factor SUI1; putative [Source:UniProtKB/TrEMBL
CADAFUAG00000271	190.068	-1.77103	0.154696	-11.4484	2.3943e-30	1.84741e-28	AFUA_3G02250	Afu3G02250	3-beta hydroxysteroid dehydrogenase/isomerase family protein [Source:UniProtKB/TrEMBL
CADAFUAG00002146	35.9429	-1.77084	0.28246	-6.26935	3.62556e-10	4.95748e-09	AFUA_6G14490	Afu6G14490	Probable beta-glucosidase H [Source:UniProtKB/Swiss-Prot
CADAFUAG00001554	78.306	-1.75789	0.228201	-7.70326	1.32639e-14	2.97123e-13	AFUA_6G00220	Afu6G00220	Fungal specific transcription factor; putative [Source:UniProtKB/TrEMBL
CADAFUAG00000101	0.754583	-1.7576	2.06723	-0.850217	0.395205	0.547631	AFUA_3G03200	Afu3G03200	Cysteine hydrolase family protein [Source:UniProtKB/TrEMBL
CADAFUAG00009809	2.4243	-1.75616	1.22318	-1.43573	0.151078	0.26676	AFUA_5G12862	Afu5G12862
CADAFUAG00003429	5.76751	-1.75231	0.6859	-2.55476	0.010626	0.0305457	AFUA_2G00380	Afu2G00380	GNAT family acetyltransferase; putative [Source:UniProtKB/TrEMBL
CADAFUAG00005711	77.1685	-1.75216	0.26186	-6.69122	2.21313e-11	3.50996e-10	AFUA_3G07650	Afu3G07650	Pectin methylesterase; putative [Source:UniProtKB/TrEMBL
CADAFUAG00003430	131.454	-1.74993	0.167436	-10.4514	1.44426e-25	8.50974e-24	AFUA_2G06205	Afu2G06205	Protein yippee-like [Source:UniProtKB/TrEMBL
CADAFUAG00000399	3399.19	-1.74741	0.232652	-7.51082	5.87593e-14	1.25276e-12	AFUA_3G03330	Afu3G03330	Mitochondrial enoyl reductase; putative [Source:UniProtKB/TrEMBL
CADAFUAG00002357	2.78945	-1.74674	1.02263	-1.70808	0.0876211	0.173706	AFUA_6G07055	Afu6G07055	Putative uncharacterized protein [Source:UniProtKB/TrEMBL
CADAFUAG00005898	230.94	-1.74197	0.316682	-5.5007	3.78279e-08	3.84689e-07	AFUA_5G12720	Afu5G12720	ABC multidrug transporter; putative [Source:UniProtKB/TrEMBL
CADAFUAG00002996	459.126	-1.73728	0.184215	-9.43071	4.07327e-21	1.76001e-19	AFUA_8G05910	Afu8G05910	Probable pectate lyase E [Source:UniProtKB/Swiss-Prot
CADAFUAG00009891	0.50929	-1.73644	2.75533	-0.630211	0.528557	0.671063			8s_rRNA [Source:RNAMMER
CADAFUAG00005973	632.445	-1.7361	0.230584	-7.52911	5.10868e-14	1.09157e-12	AFUA_5G11600	Afu5G11600	Actin cytoskeleton organization protein (Cro1); putative [Source:UniProtKB/TrEMBL
CADAFUAG00007442	1011.27	-1.72841	0.326887	-5.28749	1.24009e-07	1.17506e-06	AFUA_1G11400	Afu1G11400	Alpha/beta fold family hydrolase; putative [Source:UniProtKB/TrEMBL
CADAFUAG00004019	1663.51	-1.72499	0.269242	-6.40682	1.48582e-10	2.09654e-09	AFUA_2G15950	Afu2G15950	Putative aspergillopepsin A-like aspartic endopeptidase AFUA_2G15950 [Source:UniProtKB/Swiss-Prot
CADAFUAG00002093	3.14881	-1.72113	1.12007	-1.53663	0.124385	0.229923	AFUA_6G06410	Afu6G06410	Putative uncharacterized protein [Source:UniProtKB/TrEMBL
CADAFUAG00002604	35.2024	-1.71604	0.26908	-6.37742	1.80094e-10	2.52288e-09	AFUA_5G01310	Afu5G01310	RTA1 domain protein; putative [Source:UniProtKB/TrEMBL
CADAFUAG00009726	5.25352	-1.71322	0.730078	-2.34663	0.0189441	0.0498846	AFUA_4G03245	Afu4G03245
CADAFUAG00004395	0.522568	-1.70834	3.79576	-0.450067	0.652662	0.772202	AFUA_2G09440	Afu2G09440	Acetyl xylan esterase [Source:UniProtKB/TrEMBL
CADAFUAG00006500	14.8111	-1.70736	0.537456	-3.17674	0.00148942	0.00567627	AFUA_5G06940	Afu5G06940	Dipeptidyl peptidase III [Source:UniProtKB/TrEMBL
CADAFUAG00008197	76.5748	-1.70379	0.194377	-8.76535	1.86195e-18	6.37391e-17	AFUA_4G13960	Afu4G13960	2-dehydropantoate 2-reductase [Source:UniProtKB/TrEMBL
CADAFUAG00007003	297.114	-1.70363	0.144056	-11.8261	2.86041e-32	2.37683e-30	AFUA_1G10930	Afu1G10930	Ammonium transporter (Mep2); putative [Source:UniProtKB/TrEMBL
CADAFUAG00006961	10.9434	-1.70245	0.56247	-3.02674	0.0024721	0.00885875	AFUA_1G15660	Afu1G15660	Putative uncharacterized protein [Source:UniProtKB/TrEMBL
CADAFUAG00001210	265.039	-1.69955	0.429226	-3.95956	7.50873e-05	0.000412429	AFUA_7G00680	Afu7G00680	Putative uncharacterized protein [Source:UniProtKB/TrEMBL
CADAFUAG00000659	246.186	-1.69869	0.164054	-10.3544	3.99508e-25	2.29823e-23	AFUA_6G02040	Afu6G02040	Putative uncharacterized protein [Source:UniProtKB/TrEMBL
CADAFUAG00005252	781.225	-1.69507	0.144167	-11.7577	6.44823e-32	5.26804e-30	AFUA_3G10790	Afu3G10790	Putative uncharacterized protein [Source:UniProtKB/TrEMBL
CADAFUAG00009152	91.7145	-1.69503	0.187947	-9.01866	1.90397e-19	7.06502e-18	AFUA_1G03690	Afu1G03690	4-carboxymuconolactone decarboxylase family protein [Source:UniProtKB/TrEMBL
CADAFUAG00006714	5.78816	-1.69322	0.618361	-2.73824	0.00617685	0.0193464	AFUA_5G11440	Afu5G11440	Putative uncharacterized protein [Source:UniProtKB/TrEMBL
CADAFUAG00001552	1.67808	-1.68817	1.4619	-1.15477	0.248184	0.387895	AFUA_6G00590	Afu6G00590	Secreted peptide; putative [Source:UniProtKB/TrEMBL
CADAFUAG00002627	1.49263	-1.68743	1.23709	-1.36403	0.172557	0.294781	AFUA_5G00400	Afu5G00400	Aminotransferase; classes I and II family; putative [Source:UniProtKB/TrEMBL
CADAFUAG00000567	290.898	-1.68352	0.216299	-7.78331	7.06523e-15	1.6472e-13	AFUA_6G04990	Afu6G04990	Amino acid transporter; putative [Source:UniProtKB/TrEMBL
CADAFUAG00004311	283.78	-1.68014	0.148538	-11.3112	1.15543e-29	8.44591e-28	AFUA_2G08110	Afu2G08110	Hexokinase family protein [Source:UniProtKB/TrEMBL
CADAFUAG00000817	4.6932	-1.6795	0.816525	-2.05689	0.0396966	0.0918008	AFUA_8G00490	Afu8G00490	PKS-like enzyme; putative [Source:UniProtKB/TrEMBL
CADAFUAG00006264	466.206	-1.67513	0.387505	-4.32286	1.54021e-05	9.93626e-05	AFUA_5G10380	Afu5G10380	Probable pectin lyase A [Source:UniProtKB/Swiss-Prot
CADAFUAG00008697	212.215	-1.67429	0.359098	-4.66249	3.1241e-06	2.32383e-05	AFUA_1G01190	Afu1G01190	Putative uncharacterized protein [Source:UniProtKB/TrEMBL
CADAFUAG00003463	478.299	-1.67407	0.184545	-9.07132	1.17579e-19	4.44788e-18	AFUA_2G05720	Afu2G05720	Putative uncharacterized protein [Source:UniProtKB/TrEMBL
CADAFUAG00002495	335.79	-1.67206	0.156468	-10.6863	1.17947e-26	7.3037e-25	AFUA_4G00770	Afu4G00770	Putative uncharacterized protein [Source:UniProtKB/TrEMBL
CADAFUAG00000075	1.88606	-1.66976	1.34255	-1.24372	0.213602	0.347322	AFUA_3G00400	Afu3G00400	Putative uncharacterized protein [Source:UniProtKB/TrEMBL
CADAFUAG00009150	0.293578	-1.66856	3.28313	-0.508223	0.611297	0.740267	AFUA_1G00510	Afu1G00510	D-lactate dehydrogenase (Cytochrome); putative [Source:UniProtKB/TrEMBL
CADAFUAG00002179	186.583	-1.66713	0.227015	-7.34368	2.07805e-13	4.20016e-12	AFUA_6G14460	Afu6G14460	Haloalkanoic acid dehalogenase; putative [Source:UniProtKB/TrEMBL
CADAFUAG00002953	208.292	-1.66707	0.24801	-6.7218	1.79496e-11	2.88541e-10	AFUA_8G05930	Afu8G05930	Putative uncharacterized protein [Source:UniProtKB/TrEMBL
CADAFUAG00003619	38.4247	-1.66593	0.390362	-4.26766	1.97532e-05	0.000124459	AFUA_2G00930	Afu2G00930	Xylosidase/glycosyl hydrolase; putative [Source:UniProtKB/TrEMBL
CADAFUAG00009329	14.7302	-1.66143	0.437712	-3.79572	0.000147218	0.000756076	AFUA_7G05140	Afu7G05140	Class III chitinase; putative [Source:UniProtKB/TrEMBL
CADAFUAG00003434	1425.45	-1.65575	0.242678	-6.82284	8.92565e-12	1.4808e-10	AFUA_2G05380	Afu2G05380	C6 transcription factor; putative [Source:UniProtKB/TrEMBL
CADAFUAG00009645	10.6223	-1.65329	0.683481	-2.41892	0.0155666	0.0422262	AFUA_7G04560	Afu7G04560	Putative uncharacterized protein [Source:UniProtKB/TrEMBL
CADAFUAG00008446	18.5362	-1.65295	0.435271	-3.79752	0.000146153	0.000752996	AFUA_4G06310	Afu4G06310	Putative uncharacterized protein [Source:UniProtKB/TrEMBL
CADAFUAG00008270	24.7725	-1.65247	0.357496	-4.62233	3.79447e-06	2.76951e-05	AFUA_4G10080	Afu4G10080	Putative uncharacterized protein [Source:UniProtKB/TrEMBL
CADAFUAG00009870	2.19272	-1.65136	1.19545	-1.38137	0.167165	0.287896			8s_rRNA [Source:RNAMMER
CADAFUAG00009467	171.703	-1.64647	0.295975	-5.56288	2.65362e-08	2.7592e-07	AFUA_7G04811	Afu7G04811	Putative uncharacterized protein [Source:UniProtKB/TrEMBL
CADAFUAG00000229	26.8293	-1.63782	0.297641	-5.50267	3.74076e-08	3.80814e-07	AFUA_3G00520	Afu3G00520	SIR2 family histone deacetylase; putative [Source:UniProtKB/TrEMBL
CADAFUAG00000560	428.558	-1.6366	0.21064	-7.76966	7.86955e-15	1.82596e-13	AFUA_6G02290	Afu6G02290	Putative uncharacterized protein [Source:UniProtKB/TrEMBL
CADAFUAG00005366	52.5225	-1.63195	0.321817	-5.07106	3.956e-07	3.45866e-06	AFUA_3G09190	Afu3G09190	Aldehyde reductase I (ARI); putative [Source:UniProtKB/TrEMBL
CADAFUAG00000214	104.604	-1.63133	0.183184	-8.90542	5.31823e-19	1.887e-17	AFUA_3G03380	Afu3G03380	Sugar O-acetyltransferase; putative [Source:UniProtKB/TrEMBL
CADAFUAG00007349	33.166	-1.63114	0.41132	-3.96563	7.3202e-05	0.000403064	AFUA_1G09710	Afu1G09710	Putative uncharacterized protein [Source:UniProtKB/TrEMBL
CADAFUAG00000218	4.43009	-1.63004	0.70324	-2.31789	0.0204551	0.053272	AFUA_3G03000	Afu3G03000	Phosphatidylethanolamine-binding protein; putative [Source:UniProtKB/TrEMBL
CADAFUAG00003095	0.399783	-1.62913	3.06021	-0.53236	0.594477	0.726342	AFUA_8G06974	Afu8G06974	Putative uncharacterized protein [Source:UniProtKB/TrEMBL
CADAFUAG00009708	0.332327	-1.62589	3.18714	-0.51014	0.609953	0.739121	AFUA_6G03355	Afu6G03355
CADAFUAG00001551	17.9353	-1.6254	0.404051	-4.02276	5.75194e-05	0.000325686	AFUA_6G00110	Afu6G00110	Dihydrodipicolinate synthetase family protein [Source:UniProtKB/TrEMBL
CADAFUAG00000444	247.502	-1.62296	0.173425	-9.35828	8.10474e-21	3.42584e-19	AFUA_6G05080	Afu6G05080	ABC transporter; putative [Source:UniProtKB/TrEMBL
CADAFUAG00006377	67.9129	-1.62267	0.231316	-7.01495	2.30025e-12	4.09456e-11	AFUA_5G14490	Afu5G14490	MFS transporter; putative [Source:UniProtKB/TrEMBL
CADAFUAG00001399	90.0161	-1.61995	0.251121	-6.45087	1.11211e-10	1.60414e-09	AFUA_4G03310	Afu4G03310	C6 finger domain protein; putative [Source:UniProtKB/TrEMBL
CADAFUAG00007567	872.566	-1.61461	0.3466	-4.65843	3.18624e-06	2.36452e-05	AFUA_1G14430	Afu1G14430	Chitin binding protein; putative [Source:UniProtKB/TrEMBL
CADAFUAG00002314	3.71717	-1.61123	1.15663	-1.39303	0.16361	0.283482	AFUA_6G12100	Afu6G12100	Nitrilase family protein [Source:UniProtKB/TrEMBL
CADAFUAG00008992	13.5519	-1.60988	0.426083	-3.77833	0.000157885	0.000804908	AFUA_1G03160	Afu1G03160	Putative uncharacterized protein [Source:UniProtKB/TrEMBL
CADAFUAG00002426	2520.7	-1.60793	0.315516	-5.09619	3.46551e-07	3.06288e-06	AFUA_4G01140	Afu4G01140	MFS multidrug transporter; putative [Source:UniProtKB/TrEMBL
CADAFUAG00009340	256.163	-1.60742	0.301362	-5.33386	9.61447e-08	9.30069e-07	AFUA_7G04360	Afu7G04360	Alcohol dehydrogenase [Source:UniProtKB/TrEMBL
CADAFUAG00009830	27.2532	-1.60556	0.452574	-3.54761	0.000388739	0.001771	AFUA_1G16565	Afu1G16565
CADAFUAG00009393	901.624	-1.60442	0.146502	-10.9515	6.53411e-28	4.381e-26	AFUA_7G05015	Afu7G05015	Glyoxalase family protein [Source:UniProtKB/TrEMBL
CADAFUAG00006581	234.193	-1.60421	0.227628	-7.04752	1.82135e-12	3.2791e-11	AFUA_5G13650	Afu5G13650	Putative uncharacterized protein [Source:UniProtKB/TrEMBL
CADAFUAG00002373	33.4347	-1.60054	0.35043	-4.56734	4.93945e-06	3.51804e-05	AFUA_4G00540	Afu4G00540	Dynamin GTPase; putative [Source:UniProtKB/TrEMBL
CADAFUAG00005004	9.47896	-1.59985	0.558776	-2.86314	0.00419466	0.013923	AFUA_3G15070	Afu3G15070	Putative uncharacterized protein [Source:UniProtKB/TrEMBL
CADAFUAG00009196	0.93557	-1.5979	2.11989	-0.753768	0.450989	0.59996	AFUA_1G03190	Afu1G03190	Putative uncharacterized protein [Source:UniProtKB/TrEMBL
CADAFUAG00001002	0.387999	-1.59552	2.55166	-0.625286	0.531783	0.673616	AFUA_8G00990	Afu8G00990	F-box domain protein [Source:UniProtKB/TrEMBL
CADAFUAG00005550	6.15204	-1.59277	0.662639	-2.40367	0.0162313	0.0438093	AFUA_3G07090	Afu3G07090	Putative uncharacterized protein [Source:UniProtKB/TrEMBL
CADAFUAG00009203	0.386861	-1.59149	2.52241	-0.630939	0.52808	0.67076	AFUA_1G02310	Afu1G02310	Putative uncharacterized protein [Source:UniProtKB/TrEMBL
CADAFUAG00009805	1.60613	-1.58936	1.33058	-1.19449	0.232287	0.370152	AFUA_5G12218	Afu5G12218
CADAFUAG00000874	72.4745	-1.58673	0.433635	-3.65914	0.000253065	0.00121496	AFUA_8G01770	Afu8G01770	Putative uncharacterized protein [Source:UniProtKB/TrEMBL
CADAFUAG00007988	155.854	-1.58526	0.185456	-8.5479	1.25346e-17	3.95655e-16	AFUA_4G10790	Afu4G10790	Phosphoribosyl diphosphate synthase isoform 4 [Source:UniProtKB/TrEMBL
CADAFUAG00008526	2348.7	-1.58365	0.284359	-5.56919	2.55928e-08	2.67254e-07	AFUA_4G09930	Afu4G09930	Putative uncharacterized protein [Source:UniProtKB/TrEMBL
CADAFUAG00007507	251.451	-1.58357	0.188977	-8.37973	5.30489e-17	1.55344e-15	AFUA_1G10030	Afu1G10030	Putative uncharacterized protein [Source:UniProtKB/TrEMBL
CADAFUAG00000408	22.7544	-1.58345	0.483546	-3.27467	0.00105785	0.00423403	AFUA_6G02580	Afu6G02580	Putative uncharacterized protein [Source:UniProtKB/TrEMBL
CADAFUAG00004252	186.262	-1.5742	0.271273	-5.803	6.51405e-09	7.53923e-08	AFUA_2G16985	Afu2G16985	Integral membrane protein [Source:UniProtKB/TrEMBL
CADAFUAG00002439	12.6775	-1.57173	0.453669	-3.4645	0.000531222	0.00231801	AFUA_4G00480	Afu4G00480	MFS multidrug transporter; putative [Source:UniProtKB/TrEMBL
CADAFUAG00003187	7.47945	-1.57072	0.76117	-2.06356	0.0390598	0.0905219	AFUA_8G06500	Afu8G06500	Putative uncharacterized protein [Source:UniProtKB/TrEMBL
CADAFUAG00009405	2.13846	-1.56952	1.02755	-1.52743	0.126654	0.233275	AFUA_7G04940	Afu7G04940	Putative uncharacterized protein [Source:UniProtKB/TrEMBL
CADAFUAG00009855	1.48239	-1.56858	1.16114	-1.35089	0.176729	0.300693			8s_rRNA [Source:RNAMMER
CADAFUAG00008326	111.93	-1.567	0.183731	-8.52879	1.47889e-17	4.62306e-16	AFUA_4G09200	Afu4G09200	Putative uncharacterized protein [Source:UniProtKB/TrEMBL
CADAFUAG00004560	2884.77	-1.56514	0.0843921	-18.546	8.77826e-77	3.28239e-74	AFUA_2G09510	Afu2G09510	Putative uncharacterized protein [Source:UniProtKB/TrEMBL
CADAFUAG00003844	1231.21	-1.5584	0.102975	-15.1339	9.68294e-52	1.92117e-49	AFUA_2G02440	Afu2G02440	Putative uncharacterized protein [Source:UniProtKB/TrEMBL
CADAFUAG00000028	27.2894	-1.55817	0.431387	-3.612	0.000303839	0.00142771	AFUA_3G03510	Afu3G03510	4-hydroxyphenylpyruvate dioxygenase; putative [Source:UniProtKB/TrEMBL
CADAFUAG00004347	125.05	-1.55719	0.515472	-3.0209	0.00252022	0.00900462	AFUA_2G14420	Afu2G14420	Cutinase; putative [Source:UniProtKB/TrEMBL
CADAFUAG00001917	11.1542	-1.54994	0.670199	-2.31265	0.020742	0.0538316	AFUA_6G12130	Afu6G12130	C6 transcription factor; putative [Source:UniProtKB/TrEMBL
CADAFUAG00009571	76.863	-1.54952	0.348209	-4.44997	8.58826e-06	5.79827e-05	AFUA_7G04550	Afu7G04550	Serine/threonine protein kinase; putative [Source:UniProtKB/TrEMBL
CADAFUAG00000954	0.179592	-1.54203	3.80861	-0.40488	0.685566	0.797257	AFUA_8G01610	Afu8G01610	Putative uncharacterized protein [Source:UniProtKB/TrEMBL
CADAFUAG00009709	0.179592	-1.54203	3.80861	-0.40488	0.685566	0.797257	AFUA_6G03855	Afu6G03855
CADAFUAG00000208	12.2878	-1.53619	0.65449	-2.34716	0.0189174	0.0498278	AFUA_3G03210	Afu3G03210	Putative uncharacterized protein [Source:UniProtKB/TrEMBL
CADAFUAG00005255	52.0132	-1.53607	0.372719	-4.12127	3.76789e-05	0.000222683	AFUA_3G09400	Afu3G09400	MFS transporter (Hol1); putative [Source:UniProtKB/TrEMBL
CADAFUAG00000479	19.6796	-1.53326	0.448934	-3.41532	0.000637061	0.00270719	AFUA_6G03870	Afu6G03870	Tetratricopeptide repeat protein [Source:UniProtKB/TrEMBL
CADAFUAG00009310	91.4288	-1.53247	0.375799	-4.07791	4.54432e-05	0.000262224	AFUA_7G05560	Afu7G05560	Putative uncharacterized protein [Source:UniProtKB/TrEMBL
CADAFUAG00008284	3.54388	-1.53082	1.0437	-1.46673	0.14245	0.254794	AFUA_4G08700	Afu4G08700	Putative uncharacterized protein [Source:UniProtKB/TrEMBL
CADAFUAG00000080	22627.6	-1.52574	0.244725	-6.23449	4.53239e-10	6.15417e-09	AFUA_3G00730	Afu3G00730	Putative uncharacterized protein [Source:UniProtKB/TrEMBL
CADAFUAG00002484	12.3612	-1.52529	0.473434	-3.22176	0.00127406	0.00495458	AFUA_4G01105	Afu4G01105	C6 and C2H2 transcription factor; putative [Source:UniProtKB/TrEMBL
CADAFUAG00002294	27.1059	-1.52365	0.313532	-4.85963	1.17606e-06	9.4571e-06	AFUA_6G11880	Afu6G11880	Putative uncharacterized protein [Source:UniProtKB/TrEMBL
CADAFUAG00000192	0.711918	-1.52076	2.10004	-0.724158	0.468969	0.616957	AFUA_3G03070	Afu3G03070	MYND domain protein; putative [Source:UniProtKB/TrEMBL
CADAFUAG00002490	24.8621	-1.51709	0.52151	-2.90902	0.00362558	0.0122644	AFUA_4G00240	Afu4G00240	Amino acid transporter; putative [Source:UniProtKB/TrEMBL
CADAFUAG00003206	68.3819	-1.51348	0.235514	-6.42629	1.30759e-10	1.86398e-09	AFUA_8G06960	Afu8G06960	Putative uncharacterized protein [Source:UniProtKB/TrEMBL
CADAFUAG00003184	24.3136	-1.51052	0.617873	-2.44471	0.0144968	0.0398806	AFUA_8G06510	Afu8G06510	Putative uncharacterized protein [Source:UniProtKB/TrEMBL
CADAFUAG00007746	540.268	-1.50796	0.199095	-7.57408	3.61672e-14	7.84861e-13	AFUA_4G12650	Afu4G12650	Histone acetyltransferase (Gcn5); putative [Source:UniProtKB/TrEMBL
CADAFUAG00002651	352.17	-1.50335	0.155653	-9.65836	4.53052e-22	2.09742e-20	AFUA_5G01830	Afu5G01830	Extracellular endoglucanase; putative [Source:UniProtKB/TrEMBL
CADAFUAG00008654	92.3151	-1.50176	0.312452	-4.80635	1.53709e-06	1.20903e-05	AFUA_1G06150	Afu1G06150	L-serine dehydratase; putative [Source:UniProtKB/TrEMBL
CADAFUAG00001099	20.1063	-1.50064	0.388493	-3.86273	0.000112128	0.000591809	AFUA_7G01010	Afu7G01010	Alcohol dehydrogenase; putative [Source:UniProtKB/TrEMBL
CADAFUAG00008198	12.6582	-1.49933	0.480853	-3.11807	0.0018204	0.00675494	AFUA_4G08850	Afu4G08850	Putative uncharacterized protein [Source:UniProtKB/TrEMBL
CADAFUAG00008016	123.009	-1.49832	0.252674	-5.92984	3.03233e-09	3.71757e-08	AFUA_4G13872	Afu4G13872	Putative uncharacterized protein [Source:UniProtKB/TrEMBL
CADAFUAG00004849	0.331027	-1.49553	3.16817	-0.472049	0.636892	0.760098	AFUA_2G18060	Afu2G18060	4-dimethylallyltryptophan N-methyltransferase [Source:UniProtKB/Swiss-Prot
CADAFUAG00005663	449.347	-1.49524	0.216547	-6.9049	5.02371e-12	8.65966e-11	AFUA_3G10690	Afu3G10690	Calcium-translocating P-type ATPase(PMCA-type);putative [Source:UniProtKB/TrEMBL
CADAFUAG00002422	122.852	-1.49522	0.172953	-8.64524	5.36932e-18	1.76353e-16	AFUA_4G01570	Afu4G01570	Amino acid transporter; putative [Source:UniProtKB/TrEMBL
CADAFUAG00004437	213.705	-1.4951	0.220146	-6.79138	1.11066e-11	1.82705e-10	AFUA_2G13460	Afu2G13460	Alpha-amylase; putative [Source:UniProtKB/TrEMBL
CADAFUAG00008826	52.4657	-1.49029	0.302391	-4.92836	8.29233e-07	6.82625e-06	AFUA_1G01250	Afu1G01250	Glucuronyl hydrolase; putative [Source:UniProtKB/TrEMBL
CADAFUAG00003131	349.109	-1.48952	1.40048	-1.06358	0.287519	0.434316	AFUA_8G06170	Afu8G06170	Putative uncharacterized protein [Source:UniProtKB/TrEMBL
CADAFUAG00008454	566.616	-1.48816	0.233713	-6.36747	1.92167e-10	2.67658e-09	AFUA_4G07760	Afu4G07760	Amino acid transporter; putative [Source:UniProtKB/TrEMBL
CADAFUAG00000988	646.777	-1.48272	0.175168	-8.4646	2.57028e-17	7.71242e-16	AFUA_8G01340	Afu8G01340	MFS sugar transporter; putative [Source:UniProtKB/TrEMBL
CADAFUAG00001332	4.30271	-1.48205	0.770115	-1.92445	0.0542978	0.117673	AFUA_4G02720	Afu4G02720	GPI anchored glycosyl hydrolase; putative [Source:UniProtKB/TrEMBL
CADAFUAG00006609	1.35276	-1.4811	1.87337	-0.790608	0.429173	0.579744	AFUA_5G10350	Afu5G10350	Putative uncharacterized protein [Source:UniProtKB/TrEMBL
CADAFUAG00005132	454.154	-1.47717	0.246227	-5.99923	1.98251e-09	2.49018e-08	AFUA_3G10770	Afu3G10770	RTA1 domain protein; putative [Source:UniProtKB/TrEMBL
CADAFUAG00004336	949.598	-1.47563	0.171574	-8.60056	7.93267e-18	2.56217e-16	AFUA_2G13630	Afu2G13630	Aromatic aminotransferase Aro8; putative [Source:UniProtKB/TrEMBL
CADAFUAG00009302	200.606	-1.47476	0.233163	-6.32504	2.53169e-10	3.48134e-09	AFUA_7G06580	Afu7G06580	FAD/FMN-containing isoamyl alcohol oxidase MreA-like; putative [Source:UniProtKB/TrEMBL
CADAFUAG00008581	1.14176	-1.47189	2.68355	-0.548484	0.58336	0.717237	AFUA_1G01170	Afu1G01170
CADAFUAG00000966	30.4176	-1.47158	0.396984	-3.70691	0.000209802	0.00102652	AFUA_8G01920	Afu8G01920	Putative uncharacterized protein [Source:UniProtKB/TrEMBL
CADAFUAG00003596	54.7858	-1.46895	0.465718	-3.15416	0.00160964	0.00607735	AFUA_2G00410	Afu2G00410	Amidase family protein [Source:UniProtKB/TrEMBL
CADAFUAG00004278	1113.36	-1.46464	0.157171	-9.31878	1.17688e-20	4.95308e-19	AFUA_2G13070	Afu2G13070	Arginyl-tRNA--protein transferase 1 [Source:UniProtKB/TrEMBL
CADAFUAG00005512	28.5468	-1.46331	0.478874	-3.05573	0.00224512	0.00813227	AFUA_3G14810	Afu3G14810	Pathogenesis associated protein Pep2; putative [Source:UniProtKB/TrEMBL
CADAFUAG00000833	22.1414	-1.46314	0.339549	-4.30907	1.63943e-05	0.00010527	AFUA_8G01760	Afu8G01760	Putative uncharacterized protein [Source:UniProtKB/TrEMBL
CADAFUAG00006535	84.8779	-1.46186	0.348184	-4.19852	2.68662e-05	0.000164687	AFUA_5G12970	Afu5G12970	Putative uncharacterized protein [Source:UniProtKB/TrEMBL
CADAFUAG00008772	159.641	-1.45953	0.245963	-5.93394	2.95747e-09	3.63037e-08	AFUA_1G01940	Afu1G01940	Putative uncharacterized protein [Source:UniProtKB/TrEMBL
CADAFUAG00008314	999.939	-1.45921	0.114963	-12.6929	6.4777e-37	7.32282e-35	AFUA_4G12340	Afu4G12340	Solute carrier family 25 member 38 homolog [Source:UniProtKB/Swiss-Prot
CADAFUAG00001078	28.8089	-1.4571	0.300042	-4.85634	1.19575e-06	9.60751e-06	AFUA_7G01660	Afu7G01660	Polyketide synthase; putative [Source:UniProtKB/TrEMBL
CADAFUAG00003129	191.294	-1.45596	1.36988	-1.06284	0.287856	0.434488	AFUA_8G06400	Afu8G06400	Pfs; NB-ARC and Ankyrin domain protein [Source:UniProtKB/TrEMBL
CADAFUAG00001196	20.5538	-1.45101	0.513129	-2.82777	0.00468736	0.0153178	AFUA_7G00120	Afu7G00120	Metallo-beta-lactamase domain protein [Source:UniProtKB/TrEMBL
CADAFUAG00007564	445.957	-1.45067	0.295503	-4.90915	9.14718e-07	7.46047e-06	AFUA_1G13230	Afu1G13230	Putative uncharacterized protein [Source:UniProtKB/TrEMBL
CADAFUAG00009057	1.32522	-1.44956	1.95537	-0.741319	0.4585	0.607217	AFUA_1G02750	Afu1G02750	Putative uncharacterized protein [Source:UniProtKB/TrEMBL
CADAFUAG00007703	103.957	-1.44907	0.20921	-6.92636	4.31801e-12	7.49637e-11	AFUA_1G17460	Afu1G17460	C6 transcription factor; putative [Source:UniProtKB/TrEMBL
CADAFUAG00000134	1028.49	-1.44737	0.121595	-11.9032	1.1385e-32	9.62477e-31	AFUA_3G04240	Afu3G04240	Lipase/serine esterase; putative [Source:UniProtKB/TrEMBL
CADAFUAG00004731	2080.66	-1.4471	0.203157	-7.12306	1.0556e-12	1.93999e-11	AFUA_2G10690	Afu2G10690	MFS phosphate transporter; putative [Source:UniProtKB/TrEMBL
CADAFUAG00001716	275.608	-1.44189	0.362072	-3.98233	6.82442e-05	0.000378477	AFUA_6G14370	Afu6G14370	AraC-like ligand binding domain protein; putative [Source:UniProtKB/TrEMBL
CADAFUAG00009759	66.0144	-1.44078	0.303158	-4.75258	2.00837e-06	1.54107e-05	AFUA_2G03512	Afu2G03512
CADAFUAG00000497	85.996	-1.44064	0.246384	-5.84714	5.00085e-09	5.91463e-08	AFUA_6G02900	Afu6G02900	Rad21/Rec8 N terminal domain protein [Source:UniProtKB/TrEMBL
CADAFUAG00001888	481.17	-1.43973	0.222404	-6.47348	9.57682e-11	1.39589e-09	AFUA_6G11560	Afu6G11560	Integral membrane protein; putative [Source:UniProtKB/TrEMBL
CADAFUAG00002462	16.519	-1.43833	0.537148	-2.67772	0.00741244	0.0226189	AFUA_4G01420	Afu4G01420	Spore wall assembly protein Dit1; putative [Source:UniProtKB/TrEMBL
CADAFUAG00003685	3.44769	-1.4373	0.901	-1.59523	0.110661	0.209549	AFUA_2G00640	Afu2G00640	Beta-N-hexosaminidase; putative [Source:UniProtKB/TrEMBL
CADAFUAG00005515	1203.25	-1.43453	0.252082	-5.69071	1.26511e-08	1.38663e-07	AFUA_3G13000	Afu3G13000	Mitochondrial chaperone BCS1; putative [Source:UniProtKB/TrEMBL
CADAFUAG00001839	26.2892	-1.43006	0.286444	-4.99247	5.96129e-07	5.03962e-06	AFUA_6G11790	Afu6G11790	Putative uncharacterized protein [Source:UniProtKB/TrEMBL
CADAFUAG00001553	1805.95	-1.43	0.1729	-8.27065	1.33226e-16	3.71125e-15	AFUA_6G00520	Afu6G00520	Putative uncharacterized protein [Source:UniProtKB/TrEMBL
CADAFUAG00000136	21.0571	-1.42833	0.3084	-4.63143	3.63157e-06	2.6626e-05	AFUA_3G03920	Afu3G03920	C6 transcription factor; putative [Source:UniProtKB/TrEMBL
CADAFUAG00000582	43.461	-1.42817	0.392493	-3.63872	0.000274001	0.00130516	AFUA_6G03490	Afu6G03490	Phenol 2-monooxygenase; putative [Source:UniProtKB/TrEMBL
CADAFUAG00003441	44.5541	-1.42678	0.427064	-3.34089	0.000835094	0.00342999	AFUA_2G00430	Afu2G00430	Exo-beta-1;3-glucanase; putative [Source:UniProtKB/TrEMBL
CADAFUAG00000980	0.427991	-1.42607	2.18809	-0.651742	0.514567	0.65824	AFUA_8G00595	Afu8G00595	Ham1 family pyrophosphatase; putative [Source:UniProtKB/TrEMBL
CADAFUAG00002437	9.22166	-1.4248	0.566995	-2.5129	0.0119743	0.0338382	AFUA_4G01210	Afu4G01210	Putative uncharacterized protein [Source:UniProtKB/TrEMBL
CADAFUAG00003614	25226.1	-1.42424	0.214943	-6.62613	3.44603e-11	5.3094e-10	AFUA_2G05060	Afu2G05060	Alternative oxidase [Source:UniProtKB/TrEMBL
CADAFUAG00002586	552.85	-1.42074	0.158157	-8.98309	2.63259e-19	9.65811e-18	AFUA_5G00900	Afu5G00900	G-protein signalling regulator; putative [Source:UniProtKB/TrEMBL
CADAFUAG00002403	87.1456	-1.41907	0.298829	-4.74876	2.04666e-06	1.56921e-05	AFUA_4G00840	Afu4G00840	Putative uncharacterized protein [Source:UniProtKB/TrEMBL
CADAFUAG00003358	144.264	-1.41816	0.203028	-6.98507	2.84714e-12	5.00694e-11	AFUA_2G00670	Afu2G00670	Protein kinase; putative [Source:UniProtKB/TrEMBL
CADAFUAG00002715	14.3873	-1.41723	0.491994	-2.88058	0.00396944	0.0132797	AFUA_5G02670	Afu5G02670	ThiJ/PfpI family protein [Source:UniProtKB/TrEMBL
CADAFUAG00004823	3.60626	-1.41507	0.83418	-1.69636	0.0898185	0.177337	AFUA_2G09400	Afu2G09400	Cyclohexanone monooxygenase; putative [Source:UniProtKB/TrEMBL
CADAFUAG00002566	591.66	-1.41299	0.186964	-7.55755	4.1072e-14	8.8537e-13	AFUA_5G01870	Afu5G01870	DNA replication factor C subunit Rfc3; putative [Source:UniProtKB/TrEMBL
CADAFUAG00009279	59.9411	-1.41236	0.305125	-4.62879	3.67809e-06	2.69468e-05	AFUA_1G01530	Afu1G01530	GrpB domain protein [Source:UniProtKB/TrEMBL
CADAFUAG00000571	336.707	-1.4107	0.196592	-7.17578	7.18982e-13	1.34941e-11	AFUA_6G04830	Afu6G04830	HATPase_c domain protein; putative [Source:UniProtKB/TrEMBL
CADAFUAG00005149	2287.29	-1.41046	0.222898	-6.32781	2.48673e-10	3.42922e-09	AFUA_3G15050	Afu3G15050	Flavin-binding monooxygenase; putative [Source:UniProtKB/TrEMBL
CADAFUAG00009417	6.91955	-1.40893	0.57583	-2.44678	0.0144139	0.0396748	AFUA_7G04540	Afu7G04540	Short chain dehydrogenase/reductase family [Source:UniProtKB/TrEMBL
CADAFUAG00001457	421.665	-1.40876	0.221097	-6.37167	1.86978e-10	2.61554e-09	AFUA_4G02810	Afu4G02810	Oxidoreductase; putative [Source:UniProtKB/TrEMBL
CADAFUAG00004214	146.894	-1.40792	0.289513	-4.86306	1.15582e-06	9.30979e-06	AFUA_2G13620	Afu2G13620	Thiamine pyrophosphate enzyme; putative [Source:UniProtKB/TrEMBL
CADAFUAG00008768	806.789	-1.40592	0.1947	-7.22098	5.1614e-13	9.87779e-12	AFUA_1G06040	Afu1G06040	O-acyltransferase [Source:UniProtKB/TrEMBL
CADAFUAG00008265	1365.59	-1.40493	0.104296	-13.4706	2.33013e-41	3.19063e-39	AFUA_4G06020	Afu4G06020	Cyclin dependent kinase inhibitor Pho81; putative [Source:UniProtKB/TrEMBL
CADAFUAG00001249	22.9675	-1.40127	0.354321	-3.9548	7.65996e-05	0.000419078	AFUA_7G00200	Afu7G00200	Putative uncharacterized protein [Source:UniProtKB/TrEMBL
CADAFUAG00002404	49.97	-1.40116	0.231758	-6.04578	1.48686e-09	1.88464e-08	AFUA_4G00990	Afu4G00990	MFS quinate transporter; putative [Source:UniProtKB/TrEMBL
CADAFUAG00000160	0.118892	-1.39648	3.7991	-0.367581	0.713186	0.817159	AFUA_3G02410	Afu3G02410
CADAFUAG00001505	2.03884	-1.39576	1.25556	-1.11167	0.266281	0.409877	AFUA_6G00240	Afu6G00240	4-hydroxyphenylpyruvate dioxygenase; putative [Source:UniProtKB/TrEMBL
CADAFUAG00004646	318.859	-1.39552	0.186643	-7.47698	7.60499e-14	1.6073e-12	AFUA_2G15360	Afu2G15360	Putative uncharacterized protein [Source:UniProtKB/TrEMBL
CADAFUAG00002466	0.660651	-1.3954	1.71328	-0.81446	0.415382	0.566785	AFUA_4G00730	Afu4G00730	HHE domain protein [Source:UniProtKB/TrEMBL
CADAFUAG00007181	1536.91	-1.39482	0.371081	-3.7588	0.000170733	0.000860478	AFUA_1G15550	Afu1G15550	Homeobox and C2H2 transcription factor; putative [Source:UniProtKB/TrEMBL
CADAFUAG00008997	308.544	-1.39272	0.393897	-3.53576	0.00040661	0.00183522	AFUA_1G01690	Afu1G01690	Cytochrome P450 alkane hydroxylase; putative [Source:UniProtKB/TrEMBL
CADAFUAG00004852	25.0591	-1.39163	0.448916	-3.09998	0.00193533	0.00714031	AFUA_2G08050	Afu2G08050	Short chain dehydrogenase/reductase family protein [Source:UniProtKB/TrEMBL
CADAFUAG00006471	21.8741	-1.38421	0.323394	-4.28024	1.86688e-05	0.000118163	AFUA_5G14260	Afu5G14260	Cytochrome b5; putative [Source:UniProtKB/TrEMBL
CADAFUAG00005133	4.38256	-1.38367	0.682336	-2.02784	0.0425762	0.0969225	AFUA_3G12220	Afu3G12220	ABC transporter; putative [Source:UniProtKB/TrEMBL
CADAFUAG00000690	596.212	-1.38312	0.269263	-5.13668	2.79628e-07	2.52184e-06	AFUA_6G03600	Afu6G03600	Integral membrane protein (Pth11); putative [Source:UniProtKB/TrEMBL
CADAFUAG00004012	36.1836	-1.38301	0.402732	-3.43407	0.000594585	0.00255778	AFUA_2G15330	Afu2G15330	Putative uncharacterized protein [Source:UniProtKB/TrEMBL
CADAFUAG00008208	838.013	-1.38058	0.100614	-13.7216	7.53729e-43	1.12735e-40	AFUA_4G08240	Afu4G08240	Zinc-containing alcohol dehydrogenase; putative [Source:UniProtKB/TrEMBL
CADAFUAG00000755	121.715	-1.37755	0.227277	-6.06112	1.3518e-09	1.71793e-08	AFUA_8G02110	Afu8G02110	Putative uncharacterized protein [Source:UniProtKB/TrEMBL
CADAFUAG00002657	243.355	-1.37526	0.601905	-2.28484	0.0223219	0.0570939	AFUA_5G00500	Afu5G00500	MFS alpha-glucoside transporter; putative [Source:UniProtKB/TrEMBL
CADAFUAG00000638	183.111	-1.36881	0.2041	-6.70655	1.99279e-11	3.17085e-10	AFUA_6G03910	Afu6G03910	Integral membrane protein; Mpv17/PMP22 family; putative [Source:UniProtKB/TrEMBL
CADAFUAG00002956	12.6801	-1.3686	0.42137	-3.24798	0.00116228	0.00458221	AFUA_8G05420	Afu8G05420	Putative uncharacterized protein [Source:UniProtKB/TrEMBL
CADAFUAG00000267	71.3292	-1.36598	0.27894	-4.89704	9.72895e-07	7.92168e-06	AFUA_3G03700	Afu3G03700	MFS sugar transporter; putative [Source:UniProtKB/TrEMBL
CADAFUAG00006979	1.02285	-1.36211	1.53084	-0.889776	0.373586	0.524632	AFUA_1G10160	Afu1G10160	Putative uncharacterized protein [Source:UniProtKB/TrEMBL
CADAFUAG00002501	0.958548	-1.36193	1.48332	-0.918165	0.358533	0.509524	AFUA_4G01460	Afu4G01460	Putative uncharacterized protein [Source:UniProtKB/TrEMBL
CADAFUAG00007581	42.8346	-1.36032	0.22992	-5.91648	3.28903e-09	4.01204e-08	AFUA_1G09310	Afu1G09310	DUF6 domain protein; putative [Source:UniProtKB/TrEMBL
CADAFUAG00001704	2175.8	-1.36009	0.12481	-10.8972	1.18851e-27	7.80724e-26	AFUA_6G13190	Afu6G13190	H+/nucleoside cotransporter [Source:UniProtKB/TrEMBL
CADAFUAG00007439	35.6862	-1.35908	0.299578	-4.53663	5.71599e-06	4.01523e-05	AFUA_1G17530	Afu1G17530	MFS transporter; putative [Source:UniProtKB/TrEMBL
CADAFUAG00008427	60.2224	-1.35897	0.50054	-2.71501	0.00662745	0.0205656	AFUA_4G10610	Afu4G10610	Stress responsive A/B barrel domain protein [Source:UniProtKB/TrEMBL
CADAFUAG00002615	224.724	-1.35674	0.22151	-6.12495	9.07134e-10	1.18857e-08	AFUA_5G01580	Afu5G01580	Oxidoreductase; short chain dehydrogenase/reductase family [Source:UniProtKB/TrEMBL
CADAFUAG00005283	780.949	-1.35621	0.248597	-5.45545	4.88501e-08	4.91128e-07	AFUA_3G12170	Afu3G12170	MFS sugar transporter; putative [Source:UniProtKB/TrEMBL
CADAFUAG00003060	1.08999	-1.35445	1.68279	-0.804888	0.420884	0.572125
CADAFUAG00002390	0.709064	-1.35257	2.51127	-0.538601	0.590162	0.722512	AFUA_4G01450	Afu4G01450	Phospho-2-dehydro-3-deoxyheptonate aldolase [Source:UniProtKB/TrEMBL
CADAFUAG00001381	0.934222	-1.35163	1.64012	-0.824107	0.409879	0.561562	AFUA_4G03260	Afu4G03260	Epoxide hydrolase; putative [Source:UniProtKB/TrEMBL
CADAFUAG00002371	62.3124	-1.35005	0.389018	-3.47039	0.000519702	0.00227695	AFUA_4G00760	Afu4G00760	Putative uncharacterized protein [Source:UniProtKB/TrEMBL
CADAFUAG00005187	58.4252	-1.34972	0.458098	-2.94635	0.0032155	0.0111289	AFUA_3G08070	Afu3G08070	GMC oxidoreductase; putative [Source:UniProtKB/TrEMBL
CADAFUAG00009582	18.2885	-1.34921	0.381478	-3.53679	0.000405022	0.00182975	AFUA_7G06750	Afu7G06750	Phosphoglycerate mutase family protein; putative [Source:UniProtKB/TrEMBL
CADAFUAG00005409	0.374246	-1.34863	2.55089	-0.528689	0.597021	0.728519	AFUA_3G11520	Afu3G11520	Putative uncharacterized protein [Source:UniProtKB/TrEMBL
CADAFUAG00003862	735.135	-1.34779	0.149847	-8.99443	2.3747e-19	8.74501e-18	AFUA_2G01740	Afu2G01740	Sulfate transporter; putative [Source:UniProtKB/TrEMBL
CADAFUAG00000865	43.2958	-1.34656	0.39399	-3.41776	0.000631377	0.00268632	AFUA_8G00920	Afu8G00920	UDP-glucose dehydrogenase Ugd1; putative [Source:UniProtKB/TrEMBL
CADAFUAG00007981	171.195	-1.34486	0.185205	-7.26144	3.82999e-13	7.52225e-12	AFUA_4G09940	Afu4G09940	Polysaccharide deacetylase family protein [Source:UniProtKB/TrEMBL
CADAFUAG00002001	184.209	-1.34301	0.239296	-5.61236	1.9959e-08	2.12067e-07	AFUA_6G12080	Afu6G12080	Nonribosomal peptide synthetase 12 [Source:UniProtKB/Swiss-Prot
CADAFUAG00001237	3227.47	-1.34285	0.227988	-5.89	3.86193e-09	4.66406e-08	AFUA_7G01790	Afu7G01790	MFS transporter; putative [Source:UniProtKB/TrEMBL
CADAFUAG00007529	595.801	-1.34245	0.0969927	-13.8407	1.44767e-43	2.23401e-41	AFUA_1G09540	Afu1G09540	Vacuolar transporter chaperon Vtc1; putative [Source:UniProtKB/TrEMBL
CADAFUAG00002114	0.812473	-1.34199	2.04643	-0.655773	0.51197	0.656472	AFUA_6G11500	Afu6G11500	Dipeptidase; putative [Source:UniProtKB/TrEMBL
CADAFUAG00000079	2597.69	-1.34061	0.26155	-5.12565	2.96516e-07	2.65689e-06	AFUA_3G03280	Afu3G03280	FAD binding monooxygenase; putative [Source:UniProtKB/TrEMBL
CADAFUAG00002479	2.35898	-1.33695	0.856684	-1.56061	0.118615	0.221211	AFUA_4G01110	Afu4G01110	1;3-beta glucanase; putative [Source:UniProtKB/TrEMBL
CADAFUAG00001555	0.232838	-1.33631	3.53012	-0.378544	0.705026	0.811636	AFUA_6G00196	Afu6G00196	Putative uncharacterized protein [Source:UniProtKB/TrEMBL
CADAFUAG00000128	1457.85	-1.33522	0.163592	-8.16188	3.2985e-16	8.93261e-15	AFUA_3G00740	Afu3G00740	2-dehydropantoate 2-reductase [Source:UniProtKB/TrEMBL
CADAFUAG00002143	4941.78	-1.33397	0.315482	-4.22837	2.35389e-05	0.00014604	AFUA_6G13980	Afu6G13980	UbiA-like prenyltransferase; putative [Source:UniProtKB/TrEMBL
CADAFUAG00002375	34.715	-1.33077	0.374309	-3.55528	0.000377574	0.00172742	AFUA_4G00980	Afu4G00980	Putative uncharacterized protein [Source:UniProtKB/TrEMBL
CADAFUAG00000198	306.465	-1.32749	0.20543	-6.46201	1.03323e-10	1.49926e-09	AFUA_3G00960	Afu3G00960	Putative uncharacterized protein [Source:UniProtKB/TrEMBL
CADAFUAG00005184	166.782	-1.32684	0.274933	-4.82606	1.39263e-06	1.10524e-05	AFUA_3G06860	Afu3G06860	Putative uncharacterized protein [Source:UniProtKB/TrEMBL
CADAFUAG00005708	60.8961	-1.32294	0.296008	-4.46928	7.84842e-06	5.35455e-05	AFUA_3G09230	Afu3G09230	Carboxylesterase; putative [Source:UniProtKB/TrEMBL
CADAFUAG00002253	1480.53	-1.32258	0.240174	-5.50677	3.65471e-08	3.72444e-07	AFUA_6G14090	Afu6G14090	Uncharacterized protein AFUA_6G14090 [Source:UniProtKB/Swiss-Prot
CADAFUAG00008107	894.919	-1.31987	0.217518	-6.06784	1.29646e-09	1.65626e-08	AFUA_4G09890	Afu4G09890	Putative uncharacterized protein [Source:UniProtKB/TrEMBL
CADAFUAG00000422	2890.92	-1.31976	0.274205	-4.81303	1.48659e-06	1.1731e-05	AFUA_6G03060	Afu6G03060	MFS monosaccharide transporter; putative [Source:UniProtKB/TrEMBL
CADAFUAG00003107	283.355	-1.31917	0.170278	-7.7471	9.4012e-15	2.16583e-13	AFUA_8G06880	Afu8G06880	Probable pectinesterase A [Source:UniProtKB/Swiss-Prot
CADAFUAG00007880	27.2186	-1.3189	0.306235	-4.30684	1.65606e-05	0.000106062	AFUA_4G08120	Afu4G08120	Protease inhibitor (Tfs1); putative [Source:UniProtKB/TrEMBL
CADAFUAG00006064	2.20099	-1.31726	1.03119	-1.27741	0.201456	0.331959	AFUA_5G06915	Afu5G06915	Putative uncharacterized protein [Source:UniProtKB/TrEMBL
CADAFUAG00003497	14269.2	-1.31516	0.0905339	-14.5267	8.20346e-48	1.37507e-45	AFUA_2G03120	Afu2G03120	Probable glycosidase crf2 [Source:UniProtKB/Swiss-Prot
CADAFUAG00005571	167.111	-1.31505	0.302975	-4.34045	1.42191e-05	9.24053e-05	AFUA_3G11290	Afu3G11290	Putative uncharacterized protein [Source:UniProtKB/TrEMBL
CADAFUAG00006446	7.33811	-1.31315	0.559355	-2.34762	0.0188939	0.0498066	AFUA_5G14345	Afu5G14345	Putative uncharacterized protein [Source:UniProtKB/TrEMBL
CADAFUAG00004047	423.958	-1.31293	0.250508	-5.24106	1.59654e-07	1.49246e-06	AFUA_2G12460	Afu2G12460	Putative uncharacterized protein [Source:UniProtKB/TrEMBL
CADAFUAG00001322	36.4457	-1.31129	0.282501	-4.6417	3.45553e-06	2.54505e-05	AFUA_4G03170	Afu4G03170	Putative uncharacterized protein [Source:UniProtKB/TrEMBL
CADAFUAG00006413	55.5418	-1.30968	0.293798	-4.45777	8.28168e-06	5.60686e-05	AFUA_5G12980	Afu5G12980	Putative uncharacterized protein [Source:UniProtKB/TrEMBL
CADAFUAG00007547	382.647	-1.30794	0.325082	-4.02341	5.73609e-05	0.000325168	AFUA_1G17470	Afu1G17470	High affinity nitrate transporter NrtB [Source:UniProtKB/TrEMBL
CADAFUAG00005304	5.23724	-1.3031	0.6029	-2.16139	0.0306655	0.0742613	AFUA_3G13650	Afu3G13650	Integral membrane protein [Source:UniProtKB/TrEMBL
CADAFUAG00006116	76.6694	-1.30139	0.19309	-6.73981	1.5859e-11	2.56969e-10	AFUA_5G13725	Afu5G13725	Integral membrane protein [Source:UniProtKB/TrEMBL
CADAFUAG00008275	307.836	-1.30096	0.155697	-8.35571	6.50417e-17	1.87636e-15	AFUA_4G13350	Afu4G13350	U1 small nuclear ribonucleoprotein C [Source:UniProtKB/Swiss-Prot
CADAFUAG00004102	147.112	-1.29777	0.194196	-6.6828	2.34422e-11	3.69976e-10	AFUA_2G14930	Afu2G14930	Alanine racemase [Source:UniProtKB/TrEMBL
CADAFUAG00002727	22.149	-1.29687	0.342389	-3.78771	0.000152041	0.000778378	AFUA_5G03110	Afu5G03110	Putative uncharacterized protein [Source:UniProtKB/TrEMBL
CADAFUAG00000506	62.6252	-1.2967	0.209392	-6.19267	5.91522e-10	7.88858e-09	AFUA_6G02800	Afu6G02800	Uncharacterized protein AFUA_6G02800 [Source:UniProtKB/Swiss-Prot
CADAFUAG00001137	566.193	-1.29632	0.225243	-5.75521	8.6536e-09	9.7599e-08	AFUA_7G00380	Afu7G00380	GNAT family acetyltransferase; putative [Source:UniProtKB/TrEMBL
CADAFUAG00004234	15.1048	-1.2957	0.4376	-2.96092	0.00306722	0.0107034	AFUA_2G07830	Afu2G07830	Putative uncharacterized protein [Source:UniProtKB/TrEMBL
CADAFUAG00003259	14106.6	-1.29407	0.249769	-5.18108	2.20608e-07	2.02335e-06	AFUA_8G06554	Afu8G06554	Carbonate dehydratase; putative [Source:UniProtKB/TrEMBL
CADAFUAG00002515	0.653069	-1.28921	1.9019	-0.677854	0.497865	0.644979	AFUA_5G00435	Afu5G00435	C6 finger domain protein; putative [Source:UniProtKB/TrEMBL
CADAFUAG00008677	86.4795	-1.2889	0.293628	-4.38958	1.13572e-05	7.47053e-05	AFUA_1G01180	Afu1G01180	Isoamyl alcohol oxidase; putative [Source:UniProtKB/TrEMBL
CADAFUAG00000115	72.9392	-1.28818	0.223422	-5.76568	8.13283e-09	9.20458e-08	AFUA_3G03270	Afu3G03270	Isochorismatase family hydrolase; putative [Source:UniProtKB/TrEMBL
CADAFUAG00004471	216.462	-1.2879	0.267161	-4.8207	1.43058e-06	1.13258e-05	AFUA_2G14780	Afu2G14780	Putative uncharacterized protein [Source:UniProtKB/TrEMBL
CADAFUAG00009621	1944.79	-1.28733	0.140491	-9.16308	5.0436e-20	1.96135e-18	AFUA_7G06570	Afu7G06570	Cation diffusion facilitator family metal ion transporter; putative [Source:UniProtKB/TrEMBL
CADAFUAG00007372	333.674	-1.28686	0.231135	-5.56758	2.58306e-08	2.69448e-07	AFUA_1G13120	Afu1G13120	Putative uncharacterized protein [Source:UniProtKB/TrEMBL
CADAFUAG00005889	3.53578	-1.28612	0.876173	-1.46789	0.142135	0.254575	AFUA_5G06905	Afu5G06905	Putative uncharacterized protein [Source:UniProtKB/TrEMBL
CADAFUAG00009368	34.2414	-1.28556	0.340878	-3.77131	0.000162392	0.000825286	AFUA_7G06690	Afu7G06690	Flavin-containing monooxygenase; putative [Source:UniProtKB/TrEMBL
CADAFUAG00000393	208.272	-1.28358	0.291972	-4.39623	1.10146e-05	7.27472e-05	AFUA_3G03670	Afu3G03670	ABC multidrug transporter; putative [Source:UniProtKB/TrEMBL
CADAFUAG00002370	0.619179	-1.28251	2.56927	-0.499172	0.617658	0.745114	AFUA_4G00510	Afu4G00510	Putative uncharacterized protein [Source:UniProtKB/TrEMBL
CADAFUAG00005301	304.936	-1.28227	0.252451	-5.07928	3.78859e-07	3.32424e-06	AFUA_3G07155	Afu3G07155	Putative uncharacterized protein [Source:UniProtKB/TrEMBL
CADAFUAG00008673	1072.51	-1.28112	0.108242	-11.8357	2.55315e-32	2.1398e-30	AFUA_1G04400	Afu1G04400	37S ribosomal protein Mrp10; mitochondrial [Source:UniProtKB/TrEMBL
CADAFUAG00007857	269.367	-1.27962	0.167823	-7.62482	2.44376e-14	5.37516e-13	AFUA_4G07190	Afu4G07190	Ornithine carbamoyltransferase [Source:UniProtKB/TrEMBL
CADAFUAG00003012	408.578	-1.27954	0.173074	-7.39304	1.43513e-13	2.956e-12	AFUA_8G05380	Afu8G05380	Putative uncharacterized protein [Source:UniProtKB/TrEMBL
CADAFUAG00004465	463.608	-1.2794	0.136365	-9.38218	6.46242e-21	2.76774e-19	AFUA_2G15290	Afu2G15290	DUF636 domain protein [Source:UniProtKB/TrEMBL
CADAFUAG00004496	103.601	-1.2785	0.290461	-4.40162	1.07444e-05	7.13016e-05	AFUA_2G15350	Afu2G15350	Putative uncharacterized protein [Source:UniProtKB/TrEMBL
CADAFUAG00007100	783.717	-1.27502	0.296324	-4.3028	1.68652e-05	0.0001078	AFUA_1G11740	Afu1G11740	Putative uncharacterized protein [Source:UniProtKB/TrEMBL
CADAFUAG00009606	37.2206	-1.27425	0.392698	-3.24486	0.00117508	0.00462327	AFUA_7G05130	Afu7G05130	O-methyltransferase [Source:UniProtKB/TrEMBL
CADAFUAG00006610	68.714	-1.27374	0.280306	-4.54411	5.51674e-06	3.88651e-05	AFUA_5G12830	Afu5G12830	DUF1264 domain protein [Source:UniProtKB/TrEMBL
CADAFUAG00007773	2664.56	-1.27098	0.220836	-5.7553	8.64904e-09	9.7599e-08	AFUA_4G09450	Afu4G09450	Putative uncharacterized protein [Source:UniProtKB/TrEMBL
CADAFUAG00009374	2.18128	-1.27079	1.0812	-1.17535	0.239853	0.378609	AFUA_7G06850	Afu7G06850	Phosphoserine phosphatase; putative [Source:UniProtKB/TrEMBL
CADAFUAG00002346	769.265	-1.26985	0.232717	-5.45664	4.85241e-08	4.88355e-07	AFUA_6G06970	Afu6G06970	Putative uncharacterized protein [Source:UniProtKB/TrEMBL
CADAFUAG00000368	8.06172	-1.26737	0.498478	-2.54249	0.0110066	0.031463	AFUA_3G01620	Afu3G01620	Ankyrin and HET domain protein [Source:UniProtKB/TrEMBL
CADAFUAG00007447	29.5947	-1.26717	0.315974	-4.01035	6.06281e-05	0.000341499	AFUA_1G13000	Afu1G13000	Putative uncharacterized protein [Source:UniProtKB/TrEMBL
CADAFUAG00001980	1.33873	-1.26682	1.27022	-0.997327	0.318606	0.469245	AFUA_6G10170	Afu6G10170	Spherulin 4 family protein [Source:UniProtKB/TrEMBL
CADAFUAG00007176	78.2604	-1.26679	0.251691	-5.03311	4.82581e-07	4.1519e-06	AFUA_1G16390	Afu1G16390	MFS hexose transporter; putative [Source:UniProtKB/TrEMBL
CADAFUAG00002270	6.91384	-1.26678	0.754864	-1.67815	0.0933174	0.182799	AFUA_6G07855	Afu6G07855	Conserved threonine rich protein [Source:UniProtKB/TrEMBL
CADAFUAG00000265	11.1417	-1.26406	0.458619	-2.75623	0.00584721	0.0184927	AFUA_3G01180	Afu3G01180	Sarcosine oxidase; putative [Source:UniProtKB/TrEMBL
CADAFUAG00002971	2.85383	-1.26403	1.02653	-1.23136	0.218187	0.352889	AFUA_8G07060	Afu8G07060	Hydrophobin; putative [Source:UniProtKB/TrEMBL
CADAFUAG00006461	55.8896	-1.26382	0.312308	-4.04671	5.19431e-05	0.000296704	AFUA_5G09770	Afu5G09770	Putative uncharacterized protein [Source:UniProtKB/TrEMBL
CADAFUAG00004805	157.881	-1.26346	0.217156	-5.81822	5.94775e-09	6.95001e-08	AFUA_2G08580	Afu2G08580	Pyridoxine [Source:UniProtKB/TrEMBL
CADAFUAG00002478	30.5834	-1.26215	0.315438	-4.00128	6.30008e-05	0.000353634	AFUA_4G00260	Afu4G00260	MFS transporter; putative [Source:UniProtKB/TrEMBL
CADAFUAG00002054	1125.69	-1.26193	0.204526	-6.17002	6.82829e-10	9.03192e-09	AFUA_6G06790	Afu6G06790	Mannosyl-oligosaccharide alpha-1;2-mannosidase [Source:UniProtKB/TrEMBL
CADAFUAG00001209	4557	-1.26067	0.223	-5.65324	1.57455e-08	1.69934e-07	AFUA_7G00360	Afu7G00360	UDP-galactose 4-epimerase; putative [Source:UniProtKB/TrEMBL
CADAFUAG00003387	49.4273	-1.25907	0.302105	-4.16767	3.07724e-05	0.000186166	AFUA_2G00480	Afu2G00480	Aryl-alcohol dehydrogenase (AAD); putative [Source:UniProtKB/TrEMBL
CADAFUAG00009431	10.0063	-1.25881	0.519043	-2.42524	0.0152982	0.0416374	AFUA_7G04990	Afu7G04990	DUTP diphosphatase Dut; putative [Source:UniProtKB/TrEMBL
CADAFUAG00007923	70.2987	-1.25855	0.231126	-5.44531	5.17157e-08	5.18865e-07	AFUA_4G08640	Afu4G08640	Putative uncharacterized protein [Source:UniProtKB/TrEMBL
CADAFUAG00004077	57.7601	-1.25595	0.279039	-4.50097	6.76435e-06	4.66735e-05	AFUA_2G12800	Afu2G12800	Putative uncharacterized protein [Source:UniProtKB/TrEMBL
CADAFUAG00006727	545.546	-1.25455	0.347555	-3.60964	0.000306623	0.00144009	AFUA_5G10250	Afu5G10250	Putative uncharacterized protein [Source:UniProtKB/TrEMBL
CADAFUAG00007018	42.3654	-1.25326	0.280749	-4.464	8.04429e-06	5.47665e-05	AFUA_1G16430	Afu1G16430	Putative uncharacterized protein [Source:UniProtKB/TrEMBL
CADAFUAG00001604	679.999	-1.25213	0.239836	-5.22076	1.78187e-07	1.66092e-06	AFUA_6G07390	Afu6G07390	Isocitrate dehydrogenase LysB [Source:UniProtKB/TrEMBL
CADAFUAG00000592	145.459	-1.25119	0.181368	-6.89866	5.24943e-12	9.01679e-11	AFUA_6G02760	Afu6G02760	UDP-glucose-4-epimerase; putative [Source:UniProtKB/TrEMBL
CADAFUAG00006733	50.3531	-1.2511	0.424604	-2.94652	0.00321375	0.0111268	AFUA_5G10450	Afu5G10450	Putative uncharacterized protein [Source:UniProtKB/TrEMBL
CADAFUAG00006249	152.274	-1.24998	0.170119	-7.34764	2.01741e-13	4.08609e-12	AFUA_5G09890	Afu5G09890	C6 finger domain protein; putative [Source:UniProtKB/TrEMBL
CADAFUAG00009181	302.473	-1.24969	0.200945	-6.21907	5.00119e-10	6.73429e-09	AFUA_1G06380	Afu1G06380	DNA-directed RNA polymerase subunit [Source:UniProtKB/TrEMBL
CADAFUAG00005725	17.3813	-1.24705	0.471861	-2.64284	0.00822148	0.0246619	AFUA_3G12230	Afu3G12230	Putative uncharacterized protein [Source:UniProtKB/TrEMBL
CADAFUAG00009876	227.545	-1.24621	0.268651	-4.63878	3.5048e-06	2.57938e-05			U1 spliceosomal RNA [Source:RFAM
CADAFUAG00009653	145.65	-1.2433	0.274701	-4.52602	6.01061e-06	4.1919e-05	AFUA_7G06550	Afu7G06550	Fungal specific transcription factor; putative [Source:UniProtKB/TrEMBL
CADAFUAG00001317	482.995	-1.24283	0.174102	-7.13848	9.43713e-13	1.74094e-11	AFUA_4G02710	Afu4G02710	Putative uncharacterized protein [Source:UniProtKB/TrEMBL
CADAFUAG00004816	417.343	-1.24164	0.146564	-8.47162	2.42002e-17	7.32942e-16	AFUA_2G15340	Afu2G15340	AflR-like C6 transcription factor; putative [Source:UniProtKB/TrEMBL
CADAFUAG00007377	1066.66	-1.24059	0.130968	-9.47249	2.73257e-21	1.21306e-19	AFUA_1G16570	Afu1G16570	MIND kinetochore complex component Mtw1; putative [Source:UniProtKB/TrEMBL
CADAFUAG00000832	8.47052	-1.2382	0.55612	-2.2265	0.0259804	0.0649309	AFUA_8G00620	Afu8G00620	Dimethylallyl tryptophan synthase; putative [Source:UniProtKB/TrEMBL
CADAFUAG00006114	46.0807	-1.23692	0.33751	-3.66483	0.000247501	0.00119185	AFUA_5G14530	Afu5G14530	C6 transcription factor; putative [Source:UniProtKB/TrEMBL
CADAFUAG00007781	260.702	-1.23662	0.125477	-9.85532	6.50065e-23	3.27458e-21	AFUA_4G11477	Afu4G11477	Sucrase/ferredoxin-like family protein; putative [Source:UniProtKB/TrEMBL
CADAFUAG00000969	15.4956	-1.23639	0.423623	-2.9186	0.00351608	0.0119606	AFUA_8G02030	Afu8G02030	Putative uncharacterized protein [Source:UniProtKB/TrEMBL
CADAFUAG00005005	1180.94	-1.23624	0.145087	-8.52065	1.58657e-17	4.9438e-16	AFUA_3G05390	Afu3G05390	Protein-L-isoaspartate O-methyltransferase [Source:UniProtKB/TrEMBL
CADAFUAG00009727	39.0723	-1.23378	0.369029	-3.34332	0.000827827	0.00340302	AFUA_6G00515	Afu6G00515
CADAFUAG00001014	21.3849	-1.23273	0.390477	-3.15699	0.00159406	0.0060277	AFUA_8G00690	Afu8G00690	Putative uncharacterized protein [Source:UniProtKB/TrEMBL
CADAFUAG00000804	85.6735	-1.23235	0.310773	-3.96542	7.3267e-05	0.000403114	AFUA_8G01290	Afu8G01290	Putative uncharacterized protein [Source:UniProtKB/TrEMBL
CADAFUAG00005208	10219.6	-1.23234	0.178552	-6.90185	5.13301e-12	8.83242e-11	AFUA_3G11690	Afu3G11690	Fructose-bisphosphate aldolase; class II [Source:UniProtKB/TrEMBL
CADAFUAG00007907	9.82717	-1.22494	0.503059	-2.43499	0.0148923	0.0407954	AFUA_4G09290	Afu4G09290	Putative uncharacterized protein [Source:UniProtKB/TrEMBL
CADAFUAG00009107	66.2256	-1.22344	0.716921	-1.70652	0.0879106	0.174208	AFUA_1G01175	Afu1G01175	Putative uncharacterized protein [Source:UniProtKB/TrEMBL
CADAFUAG00007574	44.311	-1.22184	0.381926	-3.19916	0.00137829	0.00531104	AFUA_1G17660	Afu1G17660	Histidinol dehydrogenase [Source:UniProtKB/TrEMBL
CADAFUAG00009177	17.7708	-1.21966	0.503393	-2.42287	0.0153983	0.0418749	AFUA_1G01540	Afu1G01540	Endonuclease/exonuclease/phosphatase family protein [Source:UniProtKB/TrEMBL
CADAFUAG00003540	10.8665	-1.21792	0.456309	-2.66906	0.00760639	0.0231236	AFUA_2G00150	Afu2G00150	Catecholamine-O-methyltransferase; putative [Source:UniProtKB/TrEMBL
CADAFUAG00007873	5.76926	-1.21613	0.558205	-2.17865	0.0293574	0.0718742	AFUA_4G07000	Afu4G07000	Tyrosine phosphatase family protein [Source:UniProtKB/TrEMBL
CADAFUAG00003325	900.187	-1.21559	0.152699	-7.96068	1.71103e-15	4.20067e-14	AFUA_2G02890	Afu2G02890	tRNA splicing 2' phosphotransferase 1 [Source:UniProtKB/TrEMBL
CADAFUAG00001940	1832.67	-1.21438	0.146274	-8.30215	1.02245e-16	2.89804e-15	AFUA_6G13790	Afu6G13790	Flavin-binding monooxygenase; putative [Source:UniProtKB/TrEMBL
CADAFUAG00000057	1597.75	-1.21341	0.101435	-11.9625	5.5881e-33	4.80775e-31	AFUA_3G03410	Afu3G03410	Enoyl-CoA hydratase/isomerase family protein [Source:UniProtKB/TrEMBL
CADAFUAG00004839	961.554	-1.21259	0.117973	-10.2785	8.80624e-25	4.97758e-23	AFUA_2G12640	Afu2G12640	Integral membrane protein [Source:UniProtKB/TrEMBL
CADAFUAG00001506	809.213	-1.20981	0.306681	-3.94486	7.98465e-05	0.000435616	AFUA_6G00660	Afu6G00660	FAD binding domain protein [Source:UniProtKB/TrEMBL
CADAFUAG00007828	992.027	-1.20877	0.332109	-3.63968	0.000272981	0.00130094	AFUA_4G05900	Afu4G05900	Putative uncharacterized protein [Source:UniProtKB/TrEMBL
CADAFUAG00005061	36.2402	-1.20751	0.264459	-4.56596	4.97222e-06	3.53621e-05	AFUA_3G07370	Afu3G07370	Molybdopterin synthase catalytic subunit [Source:UniProtKB/Swiss-Prot
CADAFUAG00001333	1.18026	-1.20645	1.3834	-0.872086	0.383162	0.53505	AFUA_4G03615	Afu4G03615	Conidiation protein Con-6; putative [Source:UniProtKB/TrEMBL
CADAFUAG00009636	4.00286	-1.2047	0.67519	-1.78423	0.0743858	0.151737	AFUA_7G06740	Afu7G06740	Endoglucanase; putative [Source:UniProtKB/TrEMBL
CADAFUAG00001294	712.511	-1.20291	0.38213	-3.14792	0.00164439	0.00618445	AFUA_4G03120	Afu4G03120	Mitochondrial cytochrome b2; putative [Source:UniProtKB/TrEMBL
CADAFUAG00000722	291.152	-1.20164	0.239472	-5.01787	5.22483e-07	4.47935e-06	AFUA_6G04800	Afu6G04800	Lysine decarboxylase-like protein [Source:UniProtKB/TrEMBL
CADAFUAG00005090	378.901	-1.20033	0.163874	-7.32471	2.39411e-13	4.79907e-12	AFUA_3G07790	Afu3G07790	Argininosuccinate lyase [Source:UniProtKB/TrEMBL
CADAFUAG00007192	41.4961	-1.20026	0.274607	-4.37082	1.23781e-05	8.12013e-05	AFUA_1G17010	Afu1G17010	Glutathione S-transferase; putative [Source:UniProtKB/TrEMBL
CADAFUAG00004069	195.229	-1.1996	0.133181	-9.00725	2.11291e-19	7.81054e-18	AFUA_2G15740	Afu2G15740	Short chain dehydrogenase/oxidoreductase; putative [Source:UniProtKB/TrEMBL
CADAFUAG00009853	92.5112	-1.19571	0.408984	-2.9236	0.00346006	0.0118068			U4 spliceosomal RNA [Source:RFAM
CADAFUAG00001070	128.311	-1.19476	0.17057	-7.00449	2.47885e-12	4.38969e-11	AFUA_7G00690	Afu7G00690	Aminotransferase; putative [Source:UniProtKB/TrEMBL
CADAFUAG00000145	58.8182	-1.19451	0.201264	-5.93502	2.93811e-09	3.61117e-08	AFUA_3G01970	Afu3G01970	Putative uncharacterized protein [Source:UniProtKB/TrEMBL
CADAFUAG00007959	81.8839	-1.19273	0.180694	-6.60083	4.08873e-11	6.24029e-10	AFUA_4G10630	Afu4G10630	Sister chromatid cohesion protein Ctf8; putative [Source:UniProtKB/TrEMBL
CADAFUAG00008561	1049.01	-1.1917	0.178162	-6.68886	2.24914e-11	3.56125e-10	AFUA_4G10460	Afu4G10460	Homocitrate synthase [Source:UniProtKB/TrEMBL
CADAFUAG00009642	9.00815	-1.1903	0.750801	-1.58538	0.112881	0.212391	AFUA_7G08630	Afu7G08630	Putative uncharacterized protein [Source:UniProtKB/TrEMBL
CADAFUAG00003135	1.55351	-1.18705	1.6571	-0.716342	0.47378	0.621521	AFUA_8G06690	Afu8G06690	Cytochrome P450 alkane hydroxylase [Source:UniProtKB/TrEMBL
CADAFUAG00001012	2.52302	-1.18696	0.858562	-1.3825	0.166818	0.287503	AFUA_8G01540	Afu8G01540	Putative uncharacterized protein [Source:UniProtKB/TrEMBL
CADAFUAG00002589	3088.09	-1.18694	0.120683	-9.83516	7.94377e-23	3.92027e-21	AFUA_5G04230	Afu5G04230	Citrate synthase [Source:UniProtKB/TrEMBL
CADAFUAG00001939	659.664	-1.18399	0.167417	-7.07209	1.52618e-12	2.77337e-11	AFUA_6G08320	Afu6G08320	Putative uncharacterized protein [Source:UniProtKB/TrEMBL
CADAFUAG00001833	256.569	-1.18387	0.289116	-4.09479	4.22556e-05	0.000245993	AFUA_6G09090	Afu6G09090	Putative uncharacterized protein [Source:UniProtKB/TrEMBL
CADAFUAG00001215	1.96299	-1.18228	1.26237	-0.93656	0.348985	0.50027	AFUA_7G00560	Afu7G00560	Putative uncharacterized protein [Source:UniProtKB/TrEMBL
CADAFUAG00003662	266.536	-1.18185	0.201005	-5.87971	4.10975e-09	4.93881e-08	AFUA_2G03780	Afu2G03780	Putative uncharacterized protein [Source:UniProtKB/TrEMBL
CADAFUAG00008207	56.8382	-1.1805	0.36928	-3.19677	0.00138977	0.0053489	AFUA_4G08620	Afu4G08620	Putative uncharacterized protein [Source:UniProtKB/TrEMBL
CADAFUAG00005811	510.065	-1.18007	0.146118	-8.07613	6.68554e-16	1.74723e-14	AFUA_3G05470	Afu3G05470	Putative uncharacterized protein [Source:UniProtKB/TrEMBL
CADAFUAG00002924	2623.79	-1.17889	0.0984172	-11.9785	4.60428e-33	3.99668e-31	AFUA_5G04155	Afu5G04155	Putative uncharacterized protein [Source:UniProtKB/TrEMBL
CADAFUAG00003975	217.574	-1.17797	0.133268	-8.83912	9.64734e-19	3.3497e-17	AFUA_2G12610	Afu2G12610	NADPH:adrenodoxin oxidoreductase; mitochondrial [Source:UniProtKB/TrEMBL
CADAFUAG00002456	28.5543	-1.17628	0.551841	-2.13156	0.0330427	0.0789485	AFUA_4G01150	Afu4G01150	N;N-dimethylglycine oxidase [Source:UniProtKB/TrEMBL
CADAFUAG00000003	6.56529	-1.1751	0.571549	-2.05599	0.0397835	0.0918822	AFUA_3G03160	Afu3G03160	Glycerol dehydrogenase (GCY1); putative [Source:UniProtKB/TrEMBL
CADAFUAG00003009	82.247	-1.17493	0.389496	-3.01653	0.00255683	0.00912536	AFUA_8G04470	Afu8G04470	MFS transporter; putative [Source:UniProtKB/TrEMBL
CADAFUAG00006800	32.0155	-1.17487	0.275721	-4.26108	2.03438e-05	0.000127849	AFUA_5G07230	Afu5G07230	Carboxyphosphonoenolpyruvate phosphonomutase-like protein [Source:UniProtKB/TrEMBL
CADAFUAG00004473	199.368	-1.17358	0.208922	-5.61731	1.93952e-08	2.06528e-07	AFUA_2G14430	Afu2G14430	Cytochrome p450; putative [Source:UniProtKB/TrEMBL
CADAFUAG00003890	276.735	-1.17294	0.340973	-3.43998	0.000581753	0.00251258	AFUA_2G01405	Afu2G01405	Cyanovirin-N family protein [Source:UniProtKB/TrEMBL
CADAFUAG00006611	91.567	-1.16877	0.433748	-2.69458	0.00704774	0.0216251	AFUA_5G14250	Afu5G14250	DNA repair family protein [Source:UniProtKB/TrEMBL
CADAFUAG00005618	19889.4	-1.16873	0.096388	-12.1253	7.76142e-34	7.32588e-32	AFUA_3G05760	Afu3G05760	C6 transcription factor (Fcr1); putative [Source:UniProtKB/TrEMBL
CADAFUAG00002935	841.116	-1.16668	0.181495	-6.42818	1.29137e-10	1.84628e-09	AFUA_5G00610	Afu5G00610	Oxidase; putative [Source:UniProtKB/TrEMBL
CADAFUAG00007156	75.9981	-1.16378	0.229543	-5.06998	3.97862e-07	3.47218e-06	AFUA_1G17490	Afu1G17490	Glucokinase regulator family protein; putative [Source:UniProtKB/TrEMBL
CADAFUAG00007718	198.839	-1.16252	0.174893	-6.64705	2.9902e-11	4.64389e-10	AFUA_4G06160	Afu4G06160	Branched-chain-amino-acid aminotransferase [Source:UniProtKB/TrEMBL
CADAFUAG00005899	32.4238	-1.16198	0.422987	-2.74707	0.00601294	0.0189301	AFUA_5G13670	Afu5G13670	Putative uncharacterized protein [Source:UniProtKB/TrEMBL
CADAFUAG00001049	4.04291	-1.16177	0.724212	-1.60419	0.108672	0.206511	AFUA_7G00830	Afu7G00830	Alpha/beta hydrolase; putative [Source:UniProtKB/TrEMBL
CADAFUAG00007457	277.124	-1.16093	0.209563	-5.53976	3.02879e-08	3.12117e-07	AFUA_1G12200	Afu1G12200	Putative uncharacterized protein [Source:UniProtKB/TrEMBL
CADAFUAG00003211	452.321	-1.16074	0.189164	-6.13614	8.45523e-10	1.10934e-08	AFUA_8G03960	Afu8G03960	Putative uncharacterized protein [Source:UniProtKB/TrEMBL
CADAFUAG00006641	94.2081	-1.16018	0.325257	-3.56697	0.000361133	0.00166632	AFUA_5G07640	Afu5G07640	RNA 3'-terminal phosphate cyclase; putative [Source:UniProtKB/TrEMBL
CADAFUAG00009147	43.3316	-1.15978	0.283557	-4.09009	4.31199e-05	0.000250425	AFUA_1G01440	Afu1G01440	Putative uncharacterized protein [Source:UniProtKB/TrEMBL
CADAFUAG00006517	1926.65	-1.15895	0.187078	-6.19502	5.82767e-10	7.79321e-09	AFUA_5G06090	Afu5G06090	Integral membrane protein (Ytp1); putative [Source:UniProtKB/TrEMBL
CADAFUAG00000351	2.41971	-1.15794	1.02337	-1.1315	0.257844	0.39923	AFUA_3G01710	Afu3G01710	TPR domain protein [Source:UniProtKB/TrEMBL
CADAFUAG00000388	10807.6	-1.15656	0.143157	-8.07895	6.5328e-16	1.71654e-14	AFUA_3G00720	Afu3G00720	DUF500 and UBA/TS-N domain protein [Source:UniProtKB/TrEMBL
CADAFUAG00000139	270.328	-1.15451	0.293808	-3.92946	8.5136e-05	0.00046111	AFUA_3G00380	Afu3G00380	Probable beta-galactosidase E [Source:UniProtKB/Swiss-Prot
CADAFUAG00006172	68.1503	-1.15408	0.244801	-4.71436	2.42466e-06	1.83653e-05	AFUA_5G11980	Afu5G11980	MFS efflux transporter; putative [Source:UniProtKB/TrEMBL
CADAFUAG00002577	7.89092	-1.15335	0.563416	-2.04707	0.0406509	0.0935846	AFUA_5G00490	Afu5G00490	Putative uncharacterized protein [Source:UniProtKB/TrEMBL
CADAFUAG00002686	47.2432	-1.15219	0.205394	-5.60967	2.02718e-08	2.14921e-07	AFUA_5G02890	Afu5G02890	Putative uncharacterized protein [Source:UniProtKB/TrEMBL
CADAFUAG00000821	41.0887	-1.15033	0.318196	-3.61517	0.000300148	0.00141309	AFUA_8G01030	Afu8G01030	Putative uncharacterized protein [Source:UniProtKB/TrEMBL
CADAFUAG00008183	532.555	-1.15022	0.32782	-3.50868	0.000450328	0.00200922	AFUA_4G13890	Afu4G13890
CADAFUAG00005969	76.4305	-1.15005	0.292672	-3.92948	8.5128e-05	0.00046111	AFUA_5G09780	Afu5G09780	MFS multidrug transporter; putative [Source:UniProtKB/TrEMBL
CADAFUAG00009880	1.07946e+06	-1.14953	1.04568	-1.09931	0.271632	0.416203			28s_rRNA [Source:RNAMMER
CADAFUAG00008230	223.816	-1.14823	0.224696	-5.11014	3.21927e-07	2.86609e-06	AFUA_4G12050	Afu4G12050	Thermoresistant gluconokinase family protein [Source:UniProtKB/TrEMBL
CADAFUAG00000630	294.041	-1.14748	0.329132	-3.48639	0.000489594	0.00215866	AFUA_6G03890	Afu6G03890	Catalase A [Source:UniProtKB/Swiss-Prot
CADAFUAG00006399	25.4896	-1.14713	0.497388	-2.30631	0.0210933	0.0545542	AFUA_5G09090	Afu5G09090	DEAD box helicase involved in nonsense mediated decay; putative [Source:UniProtKB/TrEMBL
CADAFUAG00000052	15.2103	-1.14646	0.448147	-2.55822	0.0105208	0.0303421	AFUA_3G01930	Afu3G01930	Putative uncharacterized protein [Source:UniProtKB/TrEMBL
CADAFUAG00000449	118.716	-1.14619	0.338138	-3.3897	0.000699703	0.00293972	AFUA_6G03390	Afu6G03390	Glutathione S-transferase family protein; putative [Source:UniProtKB/TrEMBL
CADAFUAG00002779	2490.16	-1.14454	0.112545	-10.1697	2.70831e-24	1.48758e-22	AFUA_5G01880	Afu5G01880	Putative uncharacterized protein [Source:UniProtKB/TrEMBL
CADAFUAG00004818	345.964	-1.14403	0.159125	-7.18949	6.50357e-13	1.23011e-11	AFUA_2G12080	Afu2G12080	Mitochondrial phosphate transporter Pic2; putative [Source:UniProtKB/TrEMBL
CADAFUAG00000950	972.72	-1.14366	0.200552	-5.70256	1.18022e-08	1.29797e-07	AFUA_8G00940	Afu8G00940	MFS multidrug transporter; putative [Source:UniProtKB/TrEMBL
CADAFUAG00004410	43.0378	-1.14318	0.282014	-4.05365	5.04256e-05	0.000289226	AFUA_2G14330	Afu2G14330	Putative uncharacterized protein [Source:UniProtKB/TrEMBL
CADAFUAG00000955	4.46772	-1.14317	0.737601	-1.54984	0.12118	0.22526	AFUA_8G00380	Afu8G00380	DltD N-terminal domain protein [Source:UniProtKB/TrEMBL
CADAFUAG00000990	10.1902	-1.143	0.633792	-1.80344	0.0713196	0.146725	AFUA_8G00390	Afu8G00390	O-methyltransferase; putative [Source:UniProtKB/TrEMBL
CADAFUAG00000360	111.513	-1.14096	0.237779	-4.79841	1.59934e-06	1.2509e-05	AFUA_3G00220	Afu3G00220	MFS sugar transporter; putative [Source:UniProtKB/TrEMBL
CADAFUAG00001388	8.69861	-1.1386	0.535624	-2.12575	0.0335241	0.0799022	AFUA_4G02860	Afu4G02860	Glycosyl hydrolase family 88; putative [Source:UniProtKB/TrEMBL
CADAFUAG00002487	9.41009	-1.13857	0.570423	-1.99601	0.045933	0.102965	AFUA_4G00910	Afu4G00910	Short chain oxidoreductase (CsgA); putative [Source:UniProtKB/TrEMBL
CADAFUAG00009018	1165.92	-1.13832	0.195744	-5.81535	6.05073e-09	7.04493e-08	AFUA_1G03660	Afu1G03660	Acid phosphatase; putative [Source:UniProtKB/TrEMBL
CADAFUAG00002224	251.343	-1.13807	0.21952	-5.18434	2.16781e-07	1.99013e-06	AFUA_6G09400	Afu6G09400	Putative uncharacterized protein [Source:UniProtKB/TrEMBL
CADAFUAG00002467	451.249	-1.13616	0.144766	-7.84823	4.21939e-15	9.93241e-14	AFUA_4G00940	Afu4G00940	Oxidoreductase; short chain dehydrogenase/reductase family; putative [Source:UniProtKB/TrEMBL
CADAFUAG00004072	134.681	-1.13568	0.158389	-7.17016	7.49104e-13	1.40324e-11	AFUA_2G13660	Afu2G13660	Putative uncharacterized protein [Source:UniProtKB/TrEMBL
CADAFUAG00006960	183.046	-1.13452	0.234396	-4.84018	1.29723e-06	1.03459e-05	AFUA_1G15910	Afu1G15910	C6 transcription factor RosA-like; putative [Source:UniProtKB/TrEMBL
CADAFUAG00009528	3.47851	-1.13363	0.927491	-1.22225	0.221613	0.357182	AFUA_7G06830	Afu7G06830	MFS tranporter; putative [Source:UniProtKB/TrEMBL
CADAFUAG00000752	27.1322	-1.13334	0.39084	-2.89976	0.00373447	0.0126021	AFUA_6G03590	Afu6G03590	Citrate synthase [Source:UniProtKB/TrEMBL
CADAFUAG00002053	194.41	-1.13328	0.173223	-6.54232	6.05734e-11	9.10193e-10	AFUA_6G10420	Afu6G10420	Putative uncharacterized protein [Source:UniProtKB/TrEMBL
CADAFUAG00001611	225.111	-1.13311	0.133121	-8.51186	1.71172e-17	5.29978e-16	AFUA_6G08870	Afu6G08870	Nicotinamide mononucleotide adenylyl transferase [Source:UniProtKB/TrEMBL
CADAFUAG00000867	8.62179	-1.13257	0.549313	-2.0618	0.0392267	0.0908654	AFUA_8G02420	Afu8G02420	Putative uncharacterized protein [Source:UniProtKB/TrEMBL
CADAFUAG00002538	20183.4	-1.13079	0.257505	-4.39132	1.12665e-05	7.4159e-05	AFUA_5G03010	Afu5G03010	Putative uncharacterized protein [Source:UniProtKB/TrEMBL
CADAFUAG00004815	24.8854	-1.13068	0.478448	-2.36322	0.0181169	0.0481237	AFUA_2G17400	Afu2G17400	C-3 sterol dehydrogenase/C-4 decarboxylase family protein [Source:UniProtKB/TrEMBL
CADAFUAG00000348	189.101	-1.13053	0.22867	-4.94394	7.65612e-07	6.3455e-06	AFUA_3G00750	Afu3G00750	Short-chain dehydrogenase/reductase; putative [Source:UniProtKB/TrEMBL
CADAFUAG00003498	1401.96	-1.12884	0.129771	-8.69868	3.35766e-18	1.13344e-16	AFUA_2G01320	Afu2G01320	Potassium/sodium P-type ATPase; putative [Source:UniProtKB/TrEMBL
CADAFUAG00008368	2.63247	-1.12768	0.8536	-1.32109	0.186472	0.31262	AFUA_4G08150	Afu4G08150	Putative uncharacterized protein [Source:UniProtKB/TrEMBL
CADAFUAG00009851	0.973834	-1.12218	1.44023	-0.77917	0.43588	0.586036			8s_rRNA [Source:RNAMMER
CADAFUAG00007441	348.97	-1.12174	0.190987	-5.87337	4.27014e-09	5.10631e-08	AFUA_1G13370	Afu1G13370	Aflatoxin B1-aldehyde reductase GliO-like; putative [Source:UniProtKB/TrEMBL
CADAFUAG00008679	1.24988	-1.1211	1.39723	-0.802379	0.422334	0.573362	AFUA_1G03470	Afu1G03470	Putative uncharacterized protein [Source:UniProtKB/TrEMBL
CADAFUAG00000758	46.8957	-1.12072	0.29627	-3.78279	0.000155083	0.000791868	AFUA_8G00410	Afu8G00410	Methionine aminopeptidase 2-1 [Source:UniProtKB/Swiss-Prot
CADAFUAG00009897	8.37771	-1.12023	0.524573	-2.13552	0.0327188	0.0785218			8s_rRNA [Source:RNAMMER
CADAFUAG00001896	1.57992	-1.11903	1.42515	-0.785204	0.432334	0.583042	AFUA_6G10310	Afu6G10310	Putative uncharacterized protein [Source:UniProtKB/TrEMBL
CADAFUAG00003403	1536.33	-1.11816	0.163795	-6.82659	8.69543e-12	1.44508e-10	AFUA_2G05820	Afu2G05820	Riboflavin kinase [Source:UniProtKB/Swiss-Prot
CADAFUAG00008810	1.65061	-1.11811	1.13758	-0.98288	0.325667	0.476182	AFUA_1G01200	Afu1G01200	Alpha-galactosidase [Source:UniProtKB/TrEMBL
CADAFUAG00004524	42.0835	-1.11573	0.473637	-2.35567	0.0184893	0.0489123	AFUA_2G12820	Afu2G12820	Polyketide synthase; putative [Source:UniProtKB/TrEMBL
CADAFUAG00005944	1133.61	-1.11448	0.272052	-4.09655	4.19353e-05	0.000244275	AFUA_5G07170	Afu5G07170	Nucleoside-diphosphate-sugar epimerase; putative [Source:UniProtKB/TrEMBL
CADAFUAG00008687	439.032	-1.11437	0.14764	-7.54786	4.42456e-14	9.4748e-13	AFUA_1G02110	Afu1G02110	Phospho-2-dehydro-3-deoxyheptonate aldolase [Source:UniProtKB/TrEMBL
CADAFUAG00004098	342.189	-1.11364	0.226838	-4.9094	9.13548e-07	7.46047e-06	AFUA_2G14760	Afu2G14760	BCS1-like ATPase; putative [Source:UniProtKB/TrEMBL
CADAFUAG00008827	0.565127	-1.11328	1.77164	-0.628386	0.529751	0.672092	AFUA_1G01310	Afu1G01310	Carboxylesterase; putative [Source:UniProtKB/TrEMBL
CADAFUAG00003625	30.8652	-1.11219	0.303143	-3.66885	0.000243648	0.00117776	AFUA_2G00340	Afu2G00340	Diaminopropionate ammonia-lyase; putative [Source:UniProtKB/TrEMBL
CADAFUAG00006153	11.7692	-1.11065	0.639207	-1.73754	0.0822925	0.165128	AFUA_5G13680	Afu5G13680	Putative uncharacterized protein [Source:UniProtKB/TrEMBL
CADAFUAG00003086	17.7332	-1.109	0.370703	-2.99162	0.00277501	0.00979972	AFUA_8G06630	Afu8G06630	Intermediate filament associated protein; putative [Source:UniProtKB/TrEMBL
CADAFUAG00003262	9.71491	-1.10858	0.521795	-2.12454	0.0336249	0.0801033	AFUA_8G07120	Afu8G07120	Beta-1;6-glucanase Neg1; putative [Source:UniProtKB/TrEMBL
CADAFUAG00000732	51.6213	-1.10813	0.242461	-4.57034	4.86932e-06	3.48255e-05	AFUA_6G03740	Afu6G03740	C-5 cytosine methyltransferase DmtA [Source:UniProtKB/TrEMBL
CADAFUAG00008872	7530.75	-1.10602	1.20817	-0.915446	0.359957	0.510573	AFUA_1G01020	Afu1G01020	Pfs; NACHT and Ankyrin domain protein [Source:UniProtKB/TrEMBL
CADAFUAG00001714	408.061	-1.10533	0.344939	-3.20441	0.00135339	0.00522128	AFUA_6G13950	Afu6G13950	Integral membrane protein [Source:UniProtKB/TrEMBL
CADAFUAG00003704	458.653	-1.103	0.220012	-5.01336	5.34872e-07	4.57749e-06	AFUA_2G05050	Afu2G05050	Putative uncharacterized protein [Source:UniProtKB/TrEMBL
CADAFUAG00002766	251.423	-1.1018	0.151705	-7.26275	3.7931e-13	7.48002e-12	AFUA_5G02970	Afu5G02970	LCCL domain protein [Source:UniProtKB/TrEMBL
CADAFUAG00005984	16.6397	-1.09897	0.380145	-2.89092	0.0038412	0.0129263	AFUA_5G06670	Afu5G06670	Integral membrane protein [Source:UniProtKB/TrEMBL
CADAFUAG00003099	3392.59	-1.09893	0.169743	-6.47408	9.53902e-11	1.39247e-09	AFUA_8G06550	Afu8G06550	Carbonic anhydrase [Source:UniProtKB/TrEMBL
CADAFUAG00006793	1819.7	-1.09892	0.100805	-10.9014	1.13497e-27	7.50626e-26	AFUA_5G11590	Afu5G11590	Glycerophosphocholine phosphodiesterase Gde1; putative [Source:UniProtKB/TrEMBL
CADAFUAG00002187	1629.98	-1.09786	0.237266	-4.62714	3.70746e-06	2.71211e-05	AFUA_6G13970	Afu6G13970	FAD-dependent monooxygenase (PaxM); putative [Source:UniProtKB/TrEMBL
CADAFUAG00001845	575.755	-1.09751	0.233638	-4.69749	2.63379e-06	1.98187e-05	AFUA_6G09740	Afu6G09740	Thioredoxin reductase GliT [Source:UniProtKB/TrEMBL
CADAFUAG00009338	77.5511	-1.0974	0.323545	-3.39179	0.000694373	0.00292484	AFUA_7G04970	Afu7G04970	Metalloreductase; putative [Source:UniProtKB/TrEMBL
CADAFUAG00009243	245.088	-1.09704	0.247598	-4.43073	9.39153e-06	6.29252e-05	AFUA_1G06230	Afu1G06230	Ribosome biogenesis protein Ssf2; putative [Source:UniProtKB/TrEMBL
CADAFUAG00007614	219.147	-1.09445	0.152725	-7.16614	7.71437e-13	1.43952e-11	AFUA_1G09700	Afu1G09700	Ankyrin repeat protein [Source:UniProtKB/TrEMBL
CADAFUAG00005244	3448.12	-1.09209	0.141319	-7.72778	1.09438e-14	2.46858e-13	AFUA_3G07980	Afu3G07980	Putative uncharacterized protein [Source:UniProtKB/TrEMBL
CADAFUAG00003169	1.24654	-1.09173	1.44946	-0.753196	0.451332	0.600335	AFUA_8G06800	Afu8G06800	Putative uncharacterized protein [Source:UniProtKB/TrEMBL
CADAFUAG00007404	362.566	-1.08907	0.236598	-4.60303	4.16397e-06	3.02331e-05	AFUA_1G11960	Afu1G11960	Alternative NADH-dehydrogenase [Source:UniProtKB/TrEMBL
CADAFUAG00002716	1383.11	-1.08874	0.190804	-5.70608	1.15605e-08	1.27572e-07	AFUA_5G01640	Afu5G01640	Ankyrin repeat protein [Source:UniProtKB/TrEMBL
CADAFUAG00000672	5.55593	-1.08622	0.56928	-1.90805	0.0563847	0.12125	AFUA_6G03720	Afu6G03720	MFS allantoate transporter; putative [Source:UniProtKB/TrEMBL
CADAFUAG00004994	1037.16	-1.08408	0.15357	-7.05922	1.67444e-12	3.03711e-11	AFUA_3G14020	Afu3G14020	Putative uncharacterized protein [Source:UniProtKB/TrEMBL
CADAFUAG00002435	71.5264	-1.08365	0.269684	-4.01821	5.86409e-05	0.00033165	AFUA_4G01440	Afu4G01440	Glutathione S-transferase family protein [Source:UniProtKB/TrEMBL
CADAFUAG00006163	1598.24	-1.08282	0.144466	-7.49529	6.615e-14	1.40417e-12	AFUA_5G07310	Afu5G07310	DUF500 domain protein [Source:UniProtKB/TrEMBL
CADAFUAG00006071	24.0058	-1.07951	0.32556	-3.31585	0.00091366	0.00370263	AFUA_5G14140	Afu5G14140	Putative uncharacterized protein [Source:UniProtKB/TrEMBL
CADAFUAG00005219	5.8227	-1.0776	0.728324	-1.47956	0.138992	0.250237	AFUA_3G13190	Afu3G13190	Putative uncharacterized protein [Source:UniProtKB/TrEMBL
CADAFUAG00009712	2.11973	-1.07699	1.16227	-0.926627	0.35412	0.505248	AFUA_8G02495	Afu8G02495
CADAFUAG00009884	1.60606e+06	-1.07435	1.09847	-0.978045	0.328052	0.478655			28s_rRNA [Source:RNAMMER
CADAFUAG00009801	0.846662	-1.07383	1.79467	-0.598347	0.549609	0.688883	AFUA_5G09943	Afu5G09943
CADAFUAG00006188	1377.86	-1.07185	0.159804	-6.70726	1.98312e-11	3.16064e-10	AFUA_5G05500	Afu5G05500	D-3-phosphoglycerate dehydrogenase [Source:UniProtKB/TrEMBL
CADAFUAG00003573	1848.48	-1.07175	0.186478	-5.74732	9.06665e-09	1.02007e-07	AFUA_2G04090	Afu2G04090	Putative uncharacterized protein [Source:UniProtKB/TrEMBL
CADAFUAG00001628	1224.68	-1.07116	0.182004	-5.88536	3.97191e-09	4.78499e-08	AFUA_6G13140	Afu6G13140	3;4-dihydroxy-2-butanone 4-phosphate synthase [Source:UniProtKB/TrEMBL
CADAFUAG00003475	9349.59	-1.07093	0.12823	-8.3517	6.72881e-17	1.92972e-15	AFUA_2G03030	Afu2G03030	Pre-mRNA splicing factor (Prp8); putative [Source:UniProtKB/TrEMBL
CADAFUAG00007312	477.746	-1.07086	0.123581	-8.6653	4.50312e-18	1.49929e-16	AFUA_1G13360	Afu1G13360	C4-dicarboxylate transporter/malic acid transport protein; putative [Source:UniProtKB/TrEMBL
CADAFUAG00000906	25.0895	-1.06746	0.342312	-3.11838	0.00181848	0.00675037	AFUA_8G00910	Afu8G00910	Putative uncharacterized protein [Source:UniProtKB/TrEMBL
CADAFUAG00004329	921.753	-1.06708	0.202822	-5.26117	1.43145e-07	1.3459e-06	AFUA_2G13930	Afu2G13930	Putative uncharacterized protein [Source:UniProtKB/TrEMBL
CADAFUAG00005675	70.1038	-1.06665	0.210488	-5.06751	4.03046e-07	3.51112e-06	AFUA_3G10830	Afu3G10830	Glutathione S-transferase GstA [Source:UniProtKB/TrEMBL
CADAFUAG00005560	162.843	-1.06465	0.176492	-6.03227	1.61673e-09	2.04393e-08	AFUA_3G07110	Afu3G07110	Class III chitinase; putative [Source:UniProtKB/TrEMBL
CADAFUAG00001408	605.003	-1.06461	0.0883454	-12.0505	1.92789e-33	1.73546e-31	AFUA_4G02900	Afu4G02900	Sensor histidine kinase/response regulator; putative [Source:UniProtKB/TrEMBL
CADAFUAG00001816	4.35428	-1.06327	0.778345	-1.36607	0.171918	0.294074	AFUA_6G10670	Afu6G10670	Putative uncharacterized protein [Source:UniProtKB/TrEMBL
CADAFUAG00000276	3.13988	-1.06281	0.885472	-1.20027	0.230033	0.367887	AFUA_3G02130	Afu3G02130	Oxidoreductase; zinc-binding; putative [Source:UniProtKB/TrEMBL
CADAFUAG00009250	59.4304	-1.06023	0.226415	-4.68271	2.83109e-06	2.12048e-05	AFUA_1G01330	Afu1G01330	Oxidoreductase; short-chain dehydrogenase/reductase family [Source:UniProtKB/TrEMBL
CADAFUAG00003767	1028.1	-1.05801	0.220177	-4.80527	1.54547e-06	1.21463e-05	AFUA_2G01920	Afu2G01920	Glutaminyl-tRNA synthetase [Source:UniProtKB/TrEMBL
CADAFUAG00004413	50.2277	-1.05668	0.263324	-4.01283	5.99941e-05	0.000338516	AFUA_2G16610	Afu2G16610	N;N-dimethylglycine oxidase [Source:UniProtKB/TrEMBL
CADAFUAG00006737	9071.51	-1.05623	0.161501	-6.54011	6.14753e-11	9.2232e-10	AFUA_5G09240	Afu5G09240	Superoxide dismutase [Source:UniProtKB/Swiss-Prot
CADAFUAG00000292	14.0875	-1.05384	0.427167	-2.46705	0.0136231	0.0378412	AFUA_3G03460	Afu3G03460	HAD superfamily hydrolase; putative [Source:UniProtKB/TrEMBL
CADAFUAG00007648	2094.05	-1.05303	0.255146	-4.12716	3.67271e-05	0.000217588	AFUA_1G13410	Afu1G13410	Putative uncharacterized protein [Source:UniProtKB/TrEMBL
CADAFUAG00000942	4.22422	-1.05297	0.689847	-1.52639	0.126914	0.233596	AFUA_8G00400	Afu8G00400	Putative uncharacterized protein [Source:UniProtKB/TrEMBL
CADAFUAG00000086	56.991	-1.04997	0.24775	-4.23801	2.25512e-05	0.000140721	AFUA_3G03680	Afu3G03680
CADAFUAG00005771	130.381	-1.04994	0.163011	-6.44093	1.18743e-10	1.7052e-09	AFUA_3G08030	Afu3G08030	tRNA (guanine(37)-N1)-methyltransferase [Source:UniProtKB/Swiss-Prot
CADAFUAG00008125	2.3776	-1.04962	0.991503	-1.05861	0.289777	0.436507	AFUA_4G09490	Afu4G09490	Putative uncharacterized protein [Source:UniProtKB/TrEMBL
CADAFUAG00003470	74.3589	-1.04871	0.222632	-4.71051	2.47093e-06	1.86799e-05	AFUA_2G01860	Afu2G01860	Integral membrane protein [Source:UniProtKB/TrEMBL
CADAFUAG00005251	19.2086	-1.04782	0.407608	-2.57066	0.0101505	0.0294665	AFUA_3G14510	Afu3G14510	Rhamnogalacturonan acetylesterase RgaE [Source:UniProtKB/TrEMBL
CADAFUAG00006538	5353.15	-1.04743	0.0984686	-10.6372	2.0014e-26	1.20855e-24	AFUA_5G05480	Afu5G05480	Rheb small monomeric GTPase RhbA [Source:UniProtKB/TrEMBL
CADAFUAG00002219	104.725	-1.04729	0.265758	-3.94076	8.12243e-05	0.000442141	AFUA_6G08460	Afu6G08460	Cytochrome P450 alkane hydroxylase; putative [Source:UniProtKB/TrEMBL
CADAFUAG00009858	160.686	-1.04725	0.31569	-3.31734	0.000908782	0.00368593			RNase MRP [Source:RFAM
CADAFUAG00004362	338.017	-1.04703	0.831536	-1.25915	0.207975	0.340177	AFUA_2G15860	Afu2G15860	TAM domain methyltransferase; putative [Source:UniProtKB/TrEMBL
CADAFUAG00009129	22.1914	-1.04698	0.347761	-3.01063	0.00260708	0.00928766	AFUA_1G02000	Afu1G02000	DNA mismatch repair protein Msh4; putative [Source:UniProtKB/TrEMBL
CADAFUAG00002855	59.0583	-1.04593	0.263269	-3.97284	7.10217e-05	0.000392537	AFUA_5G01050	Afu5G01050	Putative uncharacterized protein [Source:UniProtKB/TrEMBL
CADAFUAG00002065	386.002	-1.04585	0.179054	-5.84097	5.18989e-09	6.10849e-08	AFUA_6G13780	Afu6G13780	MFS multidrug transporter; putative [Source:UniProtKB/TrEMBL
CADAFUAG00005642	7.03369	-1.04563	0.622092	-1.68084	0.0927946	0.182045	AFUA_3G14210	Afu3G14210	Putative uncharacterized protein [Source:UniProtKB/TrEMBL
CADAFUAG00001421	5.94731	-1.04492	0.586735	-1.78091	0.0749274	0.15265	AFUA_4G02705	Afu4G02705
CADAFUAG00003010	115.017	-1.04394	0.179181	-5.82621	5.67003e-09	6.64946e-08	AFUA_8G05760	Afu8G05760	Dehydrogenase; putative [Source:UniProtKB/TrEMBL
CADAFUAG00002636	1956.74	-1.04339	0.155387	-6.71479	1.8834e-11	3.01654e-10	AFUA_5G00890	Afu5G00890	Integral membrane protein [Source:UniProtKB/TrEMBL
CADAFUAG00009418	25.1555	-1.04333	0.269244	-3.87501	0.000106619	0.000565185	AFUA_7G05160	Afu7G05160	Fumarylacetoacetate hydrolase family protein [Source:UniProtKB/TrEMBL
CADAFUAG00004985	288.839	-1.04206	0.15039	-6.92905	4.23675e-12	7.36846e-11	AFUA_3G11355	Afu3G11355	Putative uncharacterized protein [Source:UniProtKB/TrEMBL
CADAFUAG00000924	12.4088	-1.04007	0.479565	-2.16878	0.0300998	0.0731757	AFUA_8G00530	Afu8G00530	Alpha/beta hydrolase; putative [Source:UniProtKB/TrEMBL
CADAFUAG00003805	124.795	-1.03905	0.409112	-2.53976	0.0110928	0.0316538	AFUA_2G04180	Afu2G04180	Putative uncharacterized protein [Source:UniProtKB/TrEMBL
CADAFUAG00000531	631.304	-1.03893	0.1191	-8.72319	2.70478e-18	9.19435e-17	AFUA_6G04980	Afu6G04980	Cytochrome c mitochondrial import factor (Cyc2); putative [Source:UniProtKB/TrEMBL
CADAFUAG00006078	836.165	-1.03844	0.103896	-9.99499	1.60303e-23	8.37884e-22	AFUA_5G08500	Afu5G08500	Spermine/spermidine synthase family protein [Source:UniProtKB/TrEMBL
CADAFUAG00000397	456.215	-1.03825	0.121641	-8.53538	1.39698e-17	4.3811e-16	AFUA_3G02070	Afu3G02070	C2H2 transcription factor; putative [Source:UniProtKB/TrEMBL
CADAFUAG00004207	0.625827	-1.03585	1.90387	-0.544073	0.586391	0.719824	AFUA_2G18020	Afu2G18020	Fumigaclavine B O-acetyltransferase [Source:UniProtKB/Swiss-Prot
CADAFUAG00003822	204.677	-1.03498	0.173284	-5.97275	2.33289e-09	2.91147e-08	AFUA_2G00860	Afu2G00860	Putative uncharacterized protein [Source:UniProtKB/TrEMBL
CADAFUAG00006059	990.717	-1.03478	0.150728	-6.86523	6.63829e-12	1.12239e-10	AFUA_5G07210	Afu5G07210	Homoserine O-acetyltransferase; putative [Source:UniProtKB/TrEMBL
CADAFUAG00004137	105.12	-1.03318	0.192745	-5.36033	8.30716e-08	8.10052e-07	AFUA_2G17060	Afu2G17060	60S ribosome subunit biogenesis protein NIP7 [Source:UniProtKB/TrEMBL
CADAFUAG00001112	46.319	-1.03086	0.599721	-1.71889	0.0856338	0.170623	AFUA_7G01180	Afu7G01180	Extracellular lipase; putative [Source:UniProtKB/TrEMBL
CADAFUAG00007094	379.009	-1.02978	0.122666	-8.39499	4.65932e-17	1.37266e-15	AFUA_1G09757	Afu1G09757	Cytochrome c oxidase assembly protein Cox19; putative [Source:UniProtKB/TrEMBL
CADAFUAG00006637	757.599	-1.02734	0.132938	-7.72795	1.0929e-14	2.46858e-13	AFUA_5G14820	Afu5G14820	Replication factor C subunit [Source:UniProtKB/TrEMBL
CADAFUAG00005955	130.9	-1.02723	0.323013	-3.18015	0.00147197	0.00562297	AFUA_5G09870	Afu5G09870	Putative uncharacterized protein [Source:UniProtKB/TrEMBL
CADAFUAG00000569	49.9734	-1.02668	0.242473	-4.23421	2.29356e-05	0.000142936	AFUA_6G02210	Afu6G02210	Cytochrome P450 monooxygenase; putative [Source:UniProtKB/TrEMBL
CADAFUAG00005740	25.1512	-1.02369	0.487563	-2.0996	0.0357638	0.0841878	AFUA_3G13640	Afu3G13640	Extracellular serine-rich protein; putative [Source:UniProtKB/TrEMBL
CADAFUAG00001575	312.388	-1.02261	0.316715	-3.22881	0.00124306	0.00484566	AFUA_6G13945	Afu6G13945	Cytochrome P450 monooxygenase; putative [Source:UniProtKB/TrEMBL
CADAFUAG00008786	151.164	-1.02227	0.171439	-5.96289	2.47816e-09	3.08485e-08	AFUA_1G01860	Afu1G01860	Integral membrane protein; putative [Source:UniProtKB/TrEMBL
CADAFUAG00002227	1019.11	-1.02188	0.313698	-3.25752	0.0011239	0.00445619	AFUA_6G10840	Afu6G10840	Putative uncharacterized protein [Source:UniProtKB/TrEMBL
CADAFUAG00004285	34.6597	-1.02179	0.317473	-3.21851	0.00128859	0.00500505	AFUA_2G12810	Afu2G12810	Putative uncharacterized protein [Source:UniProtKB/TrEMBL
CADAFUAG00001688	3.63398	-1.02005	1.00115	-1.01888	0.308259	0.458031	AFUA_6G14540	Afu6G14540	Endo-1;3(4)-beta-glucanase; putative [Source:UniProtKB/TrEMBL
CADAFUAG00005434	900.241	-1.01946	0.221435	-4.60389	4.1468e-06	3.01535e-05	AFUA_3G12630	Afu3G12630	Cytochrome b561; putative [Source:UniProtKB/TrEMBL
CADAFUAG00004710	10.4907	-1.01862	0.567555	-1.79474	0.0726946	0.149132	AFUA_2G16570	Afu2G16570	Short chain dehydrogenase/reductase; putative [Source:UniProtKB/TrEMBL
CADAFUAG00005951	9205.15	-1.01742	0.24585	-4.13839	3.49755e-05	0.000208993	AFUA_5G13710	Afu5G13710	Carboxylesterase; putative [Source:UniProtKB/TrEMBL
CADAFUAG00000880	828.544	-1.01696	0.119776	-8.49052	2.05716e-17	6.2892e-16	AFUA_8G01390	Afu8G01390	Glycosyl hydrolase; putative [Source:UniProtKB/TrEMBL
CADAFUAG00008559	531.736	-1.01672	0.150266	-6.76616	1.32243e-11	2.16807e-10	AFUA_4G11980	Afu4G11980	Anthranilate phosphoribosyltransferase; putative [Source:UniProtKB/TrEMBL
CADAFUAG00008500	48443.9	-1.01553	0.187477	-5.41684	6.06618e-08	6.02405e-07	AFUA_4G14380	Afu4G14380	Glutathione S-transferase; putative [Source:UniProtKB/TrEMBL
CADAFUAG00008793	178.739	-1.0154	0.139085	-7.30054	2.86611e-13	5.72163e-12	AFUA_1G03780	Afu1G03780	C6 finger domain protein; putative [Source:UniProtKB/TrEMBL
CADAFUAG00001519	3.18935	-1.01369	1.01508	-0.998626	0.317976	0.46853	AFUA_6G00330	Afu6G00330	Putative uncharacterized protein [Source:UniProtKB/TrEMBL
CADAFUAG00005142	3.19557	-1.0124	0.784324	-1.29079	0.196778	0.325907	AFUA_3G06940	Afu3G06940	C2H2 zinc finger domain protein; putative [Source:UniProtKB/TrEMBL
CADAFUAG00007699	2.52573	-1.00839	0.987119	-1.02155	0.306994	0.456608	AFUA_1G11600	Afu1G11600	Inositol monophosphatase QutG; putative [Source:UniProtKB/TrEMBL
CADAFUAG00000615	19.2617	-1.00762	0.359472	-2.80304	0.0050623	0.0163236	AFUA_6G03920	Afu6G03920	Iron-sulfur cluster-binding protein; putative [Source:UniProtKB/TrEMBL
CADAFUAG00008123	243.567	-1.00664	0.254854	-3.94986	7.81972e-05	0.000427338	AFUA_4G10930	Afu4G10930	N-acetyltransferase family protein; putative [Source:UniProtKB/TrEMBL
CADAFUAG00001255	1.67119	-1.00661	1.43046	-0.703697	0.481621	0.628584	AFUA_7G00630	Afu7G00630	Putative uncharacterized protein [Source:UniProtKB/TrEMBL
CADAFUAG00006024	26.7332	-1.00629	0.296786	-3.39062	0.000697354	0.00293112	AFUA_5G14750	Afu5G14750	DUF1115 domain protein [Source:UniProtKB/TrEMBL
CADAFUAG00004590	100.168	-1.00615	0.26725	-3.76481	0.000166674	0.000843524	AFUA_2G17880	Afu2G17880	C6 finger domain protein; putative [Source:UniProtKB/TrEMBL
CADAFUAG00008328	175.364	-1.00593	0.165948	-6.06172	1.34672e-09	1.71371e-08	AFUA_4G07605	Afu4G07605	Ribosomal protein L34 [Source:UniProtKB/TrEMBL
CADAFUAG00004738	183.558	-1.00555	0.244544	-4.11195	3.92331e-05	0.000230468	AFUA_2G16630	Afu2G16630	Acyl-CoA dehydrogenase [Source:UniProtKB/TrEMBL
CADAFUAG00001023	112.317	-1.00327	0.218251	-4.59685	4.28921e-06	3.10497e-05	AFUA_8G00342	Afu8G00342	Putative uncharacterized protein [Source:UniProtKB/TrEMBL
CADAFUAG00008499	267.832	-1.0029	0.289257	-3.46715	0.000526002	0.00229833	AFUA_4G13900	Afu4G13900	MFS transporter; putative [Source:UniProtKB/TrEMBL
CADAFUAG00009387	6.61792	-1.0027	0.517869	-1.9362	0.0528437	0.115241	AFUA_7G04000	Afu7G04000	Putative uncharacterized protein [Source:UniProtKB/TrEMBL
CADAFUAG00008421	50.5173	-1.00226	0.217173	-4.61502	3.93063e-06	2.86674e-05	AFUA_4G09170	Afu4G09170	Anion exchange family protein [Source:UniProtKB/TrEMBL
CADAFUAG00005819	6.7977	-1.00207	0.644788	-1.5541	0.120161	0.223622	AFUA_3G12910	Afu3G12910	O-methyltransferase GliM-like; putative [Source:UniProtKB/TrEMBL
CADAFUAG00006277	203.918	-1.00136	0.263269	-3.80355	0.000142635	0.000736821	AFUA_5G08490	Afu5G08490	Putative uncharacterized protein [Source:UniProtKB/TrEMBL
CADAFUAG00008675	33.1292	-1.00119	0.272233	-3.67771	0.000235338	0.00114056	AFUA_1G01830	Afu1G01830	Thiamin pyrophosphokinase; putative [Source:UniProtKB/TrEMBL
CADAFUAG00002190	1.38954	-1.00091	1.16721	-0.857522	0.391156	0.54326	AFUA_6G11960	Afu6G11960	Putative uncharacterized protein [Source:UniProtKB/TrEMBL
CADAFUAG00008039	110.209	-0.998994	0.258837	-3.85954	0.0001136	0.000599251
CADAFUAG00004682	694	-0.998893	0.280259	-3.56418	0.000364994	0.00168174	AFUA_2G12470	Afu2G12470	Acetylornithine aminotransferase [Source:UniProtKB/TrEMBL
CADAFUAG00003840	324.137	-0.997645	0.23983	-4.1598	3.18524e-05	0.000191983	AFUA_2G00780	Afu2G00780	MFS multidrug transporter; putative [Source:UniProtKB/TrEMBL
CADAFUAG00009294	2801.67	-0.996407	0.180809	-5.51084	3.57134e-08	3.64329e-07	AFUA_1G03800	Afu1G03800	C6 transcription factor; putative [Source:UniProtKB/TrEMBL
CADAFUAG00001930	80.2853	-0.995212	0.290278	-3.42848	0.000606981	0.00259502	AFUA_6G07400	Afu6G07400	Putative uncharacterized protein [Source:UniProtKB/TrEMBL
CADAFUAG00002737	1028.36	-0.994661	0.240941	-4.12823	3.65567e-05	0.00021671	AFUA_5G00870	Afu5G00870	Putative uncharacterized protein [Source:UniProtKB/TrEMBL
CADAFUAG00001634	66.5373	-0.994462	0.243867	-4.07788	4.54483e-05	0.000262224	AFUA_6G09630	Afu6G09630	C6 finger domain protein GliZ [Source:UniProtKB/TrEMBL
CADAFUAG00003089	2038.69	-0.99354	0.136572	-7.27484	3.46823e-13	6.86723e-12	AFUA_8G04100	Afu8G04100	N-acetylglucosamine-6-phosphate deacetylase [Source:UniProtKB/TrEMBL
CADAFUAG00000963	12.7902	-0.992976	0.511464	-1.94144	0.0522053	0.114157	AFUA_8G01280	Afu8G01280	Epsilon-lactone hydrolase; putative [Source:UniProtKB/TrEMBL
CADAFUAG00000646	290.819	-0.992433	0.162489	-6.10768	1.01089e-09	1.30864e-08	AFUA_6G03750	Afu6G03750	Amidophosphoribosyltransferase [Source:UniProtKB/TrEMBL
CADAFUAG00009766	0.584181	-0.992096	2.09406	-0.473767	0.635666	0.759301	AFUA_2G17485	Afu2G17485
CADAFUAG00004001	36.5881	-0.990382	0.26459	-3.74309	0.000181774	0.000909482	AFUA_2G10230	Afu2G10230	Inositol oxygenase; putative [Source:UniProtKB/TrEMBL
CADAFUAG00003735	913.718	-0.987531	0.296904	-3.32609	0.000880735	0.00358414	AFUA_2G00760	Afu2G00760	Probable pectate lyase A [Source:UniProtKB/Swiss-Prot
CADAFUAG00001869	40.9649	-0.987125	0.259954	-3.7973	0.000146279	0.000753176	AFUA_6G09670	Afu6G09670	Cytochrome P450 oxidoreductase GliC [Source:UniProtKB/TrEMBL
CADAFUAG00007570	103.332	-0.987044	0.195396	-5.0515	4.38358e-07	3.79156e-06	AFUA_1G11980	Afu1G11980	Glutamine amidotransferase; putative [Source:UniProtKB/TrEMBL
CADAFUAG00000946	1.91251	-0.986421	1.25769	-0.784313	0.432856	0.583342	AFUA_8G02410	Afu8G02410	UbiA prenyltransferase family protein [Source:UniProtKB/TrEMBL
CADAFUAG00008698	1103.04	-0.986018	0.143424	-6.87486	6.20522e-12	1.05467e-10	AFUA_1G00450	Afu1G00450	N-acetylglucosamine-6-phosphate deacetylase [Source:UniProtKB/TrEMBL
CADAFUAG00008515	128.951	-0.985974	0.217498	-4.53325	5.80819e-06	4.07411e-05	AFUA_4G11490	Afu4G11490	Putative uncharacterized protein [Source:UniProtKB/TrEMBL
CADAFUAG00005542	1069.33	-0.984746	0.304131	-3.2379	0.00120414	0.00471094	AFUA_3G09240	Afu3G09240	CAIB/BAIF family enzyme [Source:UniProtKB/TrEMBL
CADAFUAG00005637	1398.11	-0.984226	0.309124	-3.18392	0.00145296	0.00555575	AFUA_3G07690	Afu3G07690	Cytochrome c oxidase copper chaperone Cox17; putative [Source:UniProtKB/TrEMBL
CADAFUAG00003109	750.897	-0.983797	0.198702	-4.95112	7.37861e-07	6.14694e-06	AFUA_8G06080	Afu8G06080	Flavohemoprotein; putative [Source:UniProtKB/TrEMBL
CADAFUAG00006360	973.036	-0.983378	0.135707	-7.24631	4.28294e-13	8.31113e-12	AFUA_5G06210	Afu5G06210	Sucrose transporter; putative [Source:UniProtKB/TrEMBL
CADAFUAG00007170	671.38	-0.982918	0.214359	-4.58539	4.53135e-06	3.26808e-05	AFUA_1G16450	Afu1G16450	Putative uncharacterized protein [Source:UniProtKB/TrEMBL
CADAFUAG00001444	8.14712	-0.982882	0.653381	-1.5043	0.132504	0.241553	AFUA_4G03710	Afu4G03710	Glutamine synthetase; putative [Source:UniProtKB/TrEMBL
CADAFUAG00002217	186.55	-0.982016	0.204055	-4.81252	1.49042e-06	1.17517e-05	AFUA_6G12250	Afu6G12250	Succinyl-CoA:3-ketoacid-coenzyme A transferase [Source:UniProtKB/TrEMBL
CADAFUAG00002694	180.58	-0.980962	0.156749	-6.25817	3.89516e-10	5.30375e-09	AFUA_5G03900	Afu5G03900	2Fe-2S iron-sulfur cluster binding domain protein [Source:UniProtKB/TrEMBL
CADAFUAG00006191	152.527	-0.979501	0.339683	-2.88358	0.00393189	0.0131904	AFUA_5G07630	Afu5G07630	UbiE/COQ5 methyltransferase; putative [Source:UniProtKB/TrEMBL
CADAFUAG00009790	0.924378	-0.979397	1.65942	-0.590203	0.555054	0.693247	AFUA_5G12212	Afu5G12212
CADAFUAG00002172	326.675	-0.979389	0.111632	-8.77334	1.73441e-18	5.95827e-17	AFUA_6G07100	Afu6G07100	Diphthamide biosynthesis protein 2 [Source:UniProtKB/Swiss-Prot
CADAFUAG00005624	341.756	-0.978942	0.18287	-5.3532	8.64099e-08	8.40918e-07	AFUA_3G12255	Afu3G12255	Putative uncharacterized protein [Source:UniProtKB/TrEMBL
CADAFUAG00001055	4500.37	-0.978634	0.29845	-3.27905	0.00104156	0.00417223	AFUA_7G01780	Afu7G01780	Putative uncharacterized protein [Source:UniProtKB/TrEMBL
CADAFUAG00007670	1389.74	-0.978282	0.13622	-7.18165	6.8874e-13	1.30018e-11	AFUA_1G13100	Afu1G13100	Nucleoporin (Nup184); putative [Source:UniProtKB/TrEMBL
CADAFUAG00001498	14072.2	-0.978048	0.131576	-7.43335	1.05883e-13	2.19957e-12	AFUA_6G00740	Afu6G00740	Putative uncharacterized protein [Source:UniProtKB/TrEMBL
CADAFUAG00000828	2120.61	-0.977769	0.144829	-6.7512	1.46623e-11	2.39978e-10	AFUA_8G02850	Afu8G02850	Actin binding protein; putative [Source:UniProtKB/TrEMBL
CADAFUAG00001323	8.19156	-0.976388	0.547044	-1.78484	0.0742867	0.151599	AFUA_4G04415	Afu4G04415	IBR domain protein [Source:UniProtKB/TrEMBL
CADAFUAG00008722	0.559861	-0.97613	1.79574	-0.54358	0.586731	0.720045	AFUA_1G02240	Afu1G02240	Putative uncharacterized protein [Source:UniProtKB/TrEMBL
CADAFUAG00002046	2.79205	-0.975794	1.02324	-0.953632	0.34027	0.491293	AFUA_6G12145	Afu6G12145	Putative uncharacterized protein [Source:UniProtKB/TrEMBL
CADAFUAG00009061	825.169	-0.975052	0.160581	-6.07201	1.26321e-09	1.61591e-08	AFUA_1G04440	Afu1G04440	Proline utilization protein PrnX-like; putative [Source:UniProtKB/TrEMBL
CADAFUAG00006434	89.0836	-0.974836	0.300177	-3.24754	0.00116409	0.00458746	AFUA_5G09150	Afu5G09150	Oxidoreductase; short-chain dehydrogenase/reductase family [Source:UniProtKB/TrEMBL
CADAFUAG00003140	86.7516	-0.97382	0.256928	-3.79024	0.0001505	0.000771303	AFUA_8G05700	Afu8G05700	Putative uncharacterized protein [Source:UniProtKB/TrEMBL
CADAFUAG00001284	33.6661	-0.973758	0.274475	-3.54771	0.000388591	0.001771	AFUA_4G04370	Afu4G04370	Putative uncharacterized protein [Source:UniProtKB/TrEMBL
CADAFUAG00004976	33.2704	-0.973226	0.247184	-3.93724	8.24226e-05	0.000447911	AFUA_3G12210	Afu3G12210	Carboxypeptidase Y; putative [Source:UniProtKB/TrEMBL
CADAFUAG00001459	360.588	-0.971102	0.218054	-4.45349	8.44876e-06	5.70805e-05	AFUA_4G04220	Afu4G04220	Putative uncharacterized protein [Source:UniProtKB/TrEMBL
CADAFUAG00006878	6.45938	-0.970796	0.732878	-1.32464	0.185292	0.311046	AFUA_1G12860	Afu1G12860	DUF718 domain protein [Source:UniProtKB/TrEMBL
CADAFUAG00006258	67.8551	-0.970101	0.498917	-1.94442	0.0518453	0.113548	AFUA_5G06850	Afu5G06850	Putative uncharacterized protein [Source:UniProtKB/TrEMBL
CADAFUAG00003531	30545	-0.970045	0.112118	-8.652	5.06029e-18	1.67334e-16	AFUA_2G04080	Afu2G04080	GPR/FUN34 family protein [Source:UniProtKB/TrEMBL
CADAFUAG00003831	104.487	-0.96933	0.215655	-4.49483	6.96271e-06	4.79741e-05	AFUA_2G05010	Afu2G05010	Vacuolar fusion protein mon1 [Source:UniProtKB/Swiss-Prot
CADAFUAG00003895	1138.63	-0.968992	0.105973	-9.14373	6.03329e-20	2.33688e-18	AFUA_2G02080	Afu2G02080	C2H2 finger domain protein; putative [Source:UniProtKB/TrEMBL
CADAFUAG00004531	331.838	-0.967313	0.147685	-6.54984	5.75988e-11	8.66835e-10	AFUA_2G13810	Afu2G13810	Malate/L-lactate dehydrogenase; putative [Source:UniProtKB/TrEMBL
CADAFUAG00004660	109.288	-0.966878	0.156644	-6.17245	6.72387e-10	8.92971e-09	AFUA_2G16620	Afu2G16620	Protein kinase; putative [Source:UniProtKB/TrEMBL
CADAFUAG00008831	1051.45	-0.965915	0.178619	-5.40768	6.3848e-08	6.33398e-07	AFUA_1G03150	Afu1G03150	C-14 sterol reductase [Source:UniProtKB/TrEMBL
CADAFUAG00007535	3.28462	-0.964808	0.915701	-1.05363	0.292054	0.439391	AFUA_1G16740	Afu1G16740	Putative uncharacterized protein [Source:UniProtKB/TrEMBL
CADAFUAG00003389	9.58018	-0.963373	0.635757	-1.51532	0.129692	0.237541	AFUA_2G00900	Afu2G00900	PTH11-like integral membrane protein; putative [Source:UniProtKB/TrEMBL
CADAFUAG00008816	65.9599	-0.963299	0.180093	-5.34891	8.84873e-08	8.60274e-07	AFUA_1G02900	Afu1G02900	Pyridoxal kinase; putative [Source:UniProtKB/TrEMBL
CADAFUAG00001313	27.5546	-0.962501	0.295912	-3.25266	0.00114332	0.0045221	AFUA_4G02680	Afu4G02680	Putative uncharacterized protein [Source:UniProtKB/TrEMBL
CADAFUAG00003517	14.7101	-0.962204	0.53041	-1.81408	0.069666	0.143921	AFUA_2G01340	Afu2G01340	Putative uncharacterized protein [Source:UniProtKB/TrEMBL
CADAFUAG00001924	79.9013	-0.962129	0.17368	-5.53966	3.03063e-08	3.12117e-07	AFUA_6G09810	Afu6G09810	Nucleotide binding protein; putative [Source:UniProtKB/TrEMBL
CADAFUAG00008151	23.8486	-0.961821	0.295668	-3.25305	0.00114174	0.00451771	AFUA_4G14030	Afu4G14030	Putative uncharacterized protein [Source:UniProtKB/TrEMBL
CADAFUAG00001285	62.438	-0.961443	0.208851	-4.60349	4.15479e-06	3.0189e-05	AFUA_4G04210	Afu4G04210	Leucine aminopeptidase 1 [Source:UniProtKB/Swiss-Prot
CADAFUAG00001661	163.504	-0.96039	0.142438	-6.7425	1.55687e-11	2.53533e-10	AFUA_6G10790	Afu6G10790	MFS amine transporter; putative [Source:UniProtKB/TrEMBL
CADAFUAG00008751	148.275	-0.959766	0.478221	-2.00695	0.044755	0.100902	AFUA_1G06100	Afu1G06100	Glutaredoxin Grx1; putative [Source:UniProtKB/TrEMBL
CADAFUAG00002225	206.554	-0.959633	0.138915	-6.90804	4.914e-12	8.48559e-11	AFUA_6G09200	Afu6G09200	Putative uncharacterized protein [Source:UniProtKB/TrEMBL
CADAFUAG00002060	1.62259	-0.958388	1.17265	-0.817281	0.413768	0.565774	AFUA_6G08500	Afu6G08500	Phosphoglycerate mutase family protein [Source:UniProtKB/TrEMBL
CADAFUAG00006428	59.0782	-0.957816	0.32076	-2.98609	0.00282573	0.00993194	AFUA_5G13940	Afu5G13940	FAD dependent oxidoreductase superfamily [Source:UniProtKB/TrEMBL
CADAFUAG00002377	4.91322	-0.956581	0.66852	-1.43089	0.152461	0.268714	AFUA_4G00430	Afu4G00430	Isoamyl alcohol oxidase; putative [Source:UniProtKB/TrEMBL
CADAFUAG00000441	70.5082	-0.95606	0.211227	-4.52622	6.00484e-06	4.19089e-05	AFUA_6G02810	Afu6G02810	Ctr copper transporter; putative [Source:UniProtKB/TrEMBL
CADAFUAG00004515	3.58189	-0.955181	0.872132	-1.09523	0.273418	0.418148	AFUA_2G09880	Afu2G09880	Putative uncharacterized protein [Source:UniProtKB/TrEMBL
CADAFUAG00000979	46.1643	-0.954944	0.214784	-4.44606	8.74589e-06	5.8965e-05	AFUA_8G01222	Afu8G01222	NRPS-like enzyme; putative [Source:UniProtKB/TrEMBL
CADAFUAG00005015	239.978	-0.952955	0.195536	-4.87354	1.09614e-06	8.86576e-06	AFUA_3G08390	Afu3G08390	tRNA dihydrouridine synthase (Smm1); putative [Source:UniProtKB/TrEMBL
CADAFUAG00005643	806.594	-0.950502	0.234178	-4.05888	4.93082e-05	0.000283151	AFUA_3G11350	Afu3G11350	ATPase get3 [Source:UniProtKB/Swiss-Prot
CADAFUAG00001259	16.5581	-0.94753	0.38861	-2.43826	0.0147583	0.0405197	AFUA_7G01200	Afu7G01200	Aspergillopepsin; putaitve [Source:UniProtKB/TrEMBL
CADAFUAG00003178	1058.5	-0.947452	0.0992428	-9.54681	1.33754e-21	6.10496e-20	AFUA_8G03905	Afu8G03905	Putative uncharacterized protein [Source:UniProtKB/TrEMBL
CADAFUAG00007533	12.6136	-0.9464	0.476517	-1.98608	0.0470246	0.105049	AFUA_1G10250	Afu1G10250	Putative uncharacterized protein [Source:UniProtKB/TrEMBL
CADAFUAG00007628	5220.6	-0.946315	0.181667	-5.20907	1.89785e-07	1.75851e-06	AFUA_1G12170	Afu1G12170	Elongation factor Tu [Source:UniProtKB/TrEMBL
CADAFUAG00006432	7.65135	-0.945497	0.530796	-1.78128	0.0748664	0.152589	AFUA_5G14582	Afu5G14582	Pfs; NACHT and Ankyrin domain protein [Source:UniProtKB/TrEMBL
CADAFUAG00001390	1244.92	-0.944188	0.282409	-3.34333	0.000827783	0.00340302	AFUA_4G03585	Afu4G03585	Probable alpha-galactosidase D [Source:UniProtKB/Swiss-Prot
CADAFUAG00006594	28.5504	-0.94405	0.313915	-3.00734	0.00263543	0.00936806	AFUA_5G09030	Afu5G09030	F-box domain and ankyrin repeat protein [Source:UniProtKB/TrEMBL
CADAFUAG00002446	5.3231	-0.942301	0.599838	-1.57093	0.1162	0.217374	AFUA_4G00850	Afu4G00850	Putative uncharacterized protein [Source:UniProtKB/TrEMBL
CADAFUAG00003442	8.00254	-0.941747	0.640243	-1.47092	0.141312	0.25357	AFUA_2G00390	Afu2G00390	Putative uncharacterized protein [Source:UniProtKB/TrEMBL
CADAFUAG00000087	98.7029	-0.941539	0.213731	-4.40526	1.05657e-05	7.02114e-05	AFUA_3G01790	Afu3G01790	Isoflavone reductase family protein [Source:UniProtKB/TrEMBL
CADAFUAG00001115	1.19825	-0.941013	1.17121	-0.803457	0.42171	0.572767	AFUA_7G00890	Afu7G00890	Putative uncharacterized protein [Source:UniProtKB/TrEMBL
CADAFUAG00004308	48057.8	-0.940733	0.116682	-8.06234	7.48493e-16	1.94049e-14	AFUA_2G10750	Afu2G10750	ATP-dependent RNA helicase dbp2 [Source:UniProtKB/Swiss-Prot
CADAFUAG00009493	11.7774	-0.940448	0.50344	-1.86804	0.0617562	0.130719	AFUA_7G06710	Afu7G06710	Putative uncharacterized protein [Source:UniProtKB/TrEMBL
CADAFUAG00004997	2638.29	-0.939834	0.156259	-6.0146	1.80335e-09	2.27395e-08	AFUA_3G08600	Afu3G08600	Translational initiation factor 2 beta [Source:UniProtKB/TrEMBL
CADAFUAG00002430	63.0464	-0.939218	0.360945	-2.60211	0.00926533	0.0273555	AFUA_4G00720	Afu4G00720	Protein phosphatase 2C; putative [Source:UniProtKB/TrEMBL
CADAFUAG00008204	1034.13	-0.939093	0.185468	-5.06337	4.11918e-07	3.57559e-06	AFUA_4G07210	Afu4G07210	Mitochondrial acetolactate synthase small subunit; putative [Source:UniProtKB/TrEMBL
CADAFUAG00006509	507.745	-0.938048	0.178898	-5.24348	1.57576e-07	1.47445e-06	AFUA_5G11030	Afu5G11030	Acyltransferase; putative [Source:UniProtKB/TrEMBL
CADAFUAG00002483	158.712	-0.937486	0.193678	-4.84043	1.29556e-06	1.0341e-05	AFUA_4G00290	Afu4G00290	Succinyl-CoA synthetase beta subunit; putative [Source:UniProtKB/TrEMBL
CADAFUAG00004966	777.867	-0.93671	0.126861	-7.38377	1.53873e-13	3.15601e-12	AFUA_3G05480	Afu3G05480	Cystathionine gamma-synthase; putative [Source:UniProtKB/TrEMBL
CADAFUAG00000433	41.5053	-0.936528	0.320524	-2.92187	0.00347937	0.011844	AFUA_6G01850	Afu6G01850	Putative uncharacterized protein [Source:UniProtKB/TrEMBL
CADAFUAG00001311	2597.71	-0.936272	0.264592	-3.53855	0.000402335	0.00182015	AFUA_4G02840	Afu4G02840	NmrA-like family protein; putative [Source:UniProtKB/TrEMBL
CADAFUAG00001497	2039.17	-0.936224	0.321618	-2.91098	0.00360302	0.0122051	AFUA_6G00730	Afu6G00730	Putative uncharacterized protein [Source:UniProtKB/TrEMBL
CADAFUAG00000814	571.2	-0.936051	0.332993	-2.81103	0.00493836	0.0159823	AFUA_8G00470	Afu8G00470	Putative uncharacterized protein [Source:UniProtKB/TrEMBL
CADAFUAG00004034	12.1387	-0.93549	0.567376	-1.6488	0.0991888	0.192171	AFUA_2G08180	Afu2G08180	Flotillin domain protein [Source:UniProtKB/TrEMBL
CADAFUAG00000923	9.90991	-0.93424	0.518043	-1.8034	0.071325	0.146725	AFUA_8G01350	Afu8G01350	Putative uncharacterized protein [Source:UniProtKB/TrEMBL
CADAFUAG00009895	10.4044	-0.934134	0.626023	-1.49217	0.135654	0.245775			Small nucleolar RNA Z13/snr52 [Source:RFAM
CADAFUAG00007645	32.0762	-0.933582	0.285521	-3.26975	0.00107642	0.00429948	AFUA_1G14630	Afu1G14630	tRNAHis guanylyltransferase Thg1; putative [Source:UniProtKB/TrEMBL
CADAFUAG00008294	90.6466	-0.933434	0.240376	-3.88322	0.000103084	0.000548239	AFUA_4G13950	Afu4G13950	GNAT family acetyltransferase; putative [Source:UniProtKB/TrEMBL
CADAFUAG00002461	212.687	-0.932458	0.334996	-2.78349	0.0053778	0.017204	AFUA_4G01400	Afu4G01400	ThiJ/PfpI family protein [Source:UniProtKB/TrEMBL
CADAFUAG00009239	33.7759	-0.932164	0.470637	-1.98064	0.0476313	0.106006	AFUA_1G03210	Afu1G03210	MYB family conidiophore development protein FlbD; putative [Source:UniProtKB/TrEMBL
CADAFUAG00007169	177.231	-0.931507	0.161238	-5.77724	7.5938e-09	8.66513e-08	AFUA_1G16630	Afu1G16630	Short chain dehydrogenase family protein [Source:UniProtKB/TrEMBL
CADAFUAG00008898	212.58	-0.931139	0.141785	-6.56728	5.12427e-11	7.77194e-10	AFUA_1G03770	Afu1G03770	Putative uncharacterized protein [Source:UniProtKB/TrEMBL
CADAFUAG00009742	2.0152	-0.931098	1.00209	-0.929155	0.352809	0.503894	AFUA_8G05995	Afu8G05995
CADAFUAG00000175	2315.98	-0.928876	0.112925	-8.22564	1.94154e-16	5.33211e-15	AFUA_3G00850	Afu3G00850	Putative uncharacterized protein [Source:UniProtKB/TrEMBL
CADAFUAG00003747	18.7088	-0.927848	0.440135	-2.1081	0.0350227	0.0827841	AFUA_2G04320	Afu2G04320	NADH-dependent flavin oxidoreductase; putative [Source:UniProtKB/TrEMBL
CADAFUAG00000585	122.5	-0.927633	0.321874	-2.88197	0.00395193	0.0132439	AFUA_6G05160	Afu6G05160	C2H2 transcription factor (Azf1); putative [Source:UniProtKB/TrEMBL
CADAFUAG00003568	1.91414	-0.927519	0.971559	-0.954671	0.339744	0.490859	AFUA_2G05300	Afu2G05300	Putative uncharacterized protein [Source:UniProtKB/TrEMBL
CADAFUAG00007806	3181.67	-0.927068	0.176298	-5.25854	1.45207e-07	1.36396e-06	AFUA_4G09190	Afu4G09190	S-adenosyl-methionine-sterol-C-methyltransferas [Source:UniProtKB/TrEMBL
CADAFUAG00002760	1516.61	-0.926122	0.297892	-3.10892	0.00187776	0.0069492	AFUA_5G00860	Afu5G00860	Ankyrin repeat protein [Source:UniProtKB/TrEMBL
CADAFUAG00006552	57.5911	-0.926088	0.275586	-3.36043	0.000778213	0.00322635	AFUA_5G06930	Afu5G06930	Putative uncharacterized protein [Source:UniProtKB/TrEMBL
CADAFUAG00000089	126.45	-0.925888	0.188732	-4.90584	9.30266e-07	7.58093e-06	AFUA_3G01940	Afu3G01940	MFS multidrug transporter; putative [Source:UniProtKB/TrEMBL
CADAFUAG00006606	420.652	-0.925267	0.161499	-5.72924	1.0088e-08	1.1273e-07	AFUA_5G10640	Afu5G10640	Tyrosyl-tRNA synthetase [Source:UniProtKB/TrEMBL
CADAFUAG00008511	1367.76	-0.925139	0.272752	-3.39187	0.000694182	0.00292484	AFUA_4G06170	Afu4G06170	Putative uncharacterized protein [Source:UniProtKB/TrEMBL
CADAFUAG00000930	800.527	-0.924891	0.230077	-4.01992	5.82177e-05	0.000329448	AFUA_8G02860	Afu8G02860	AMP deaminase Amd1; putative [Source:UniProtKB/TrEMBL
CADAFUAG00008119	36.3975	-0.924429	0.319211	-2.89598	0.00377974	0.0127441	AFUA_4G13980	Afu4G13980	Putative uncharacterized protein [Source:UniProtKB/TrEMBL
CADAFUAG00006115	0.720427	-0.924343	2.31122	-0.399937	0.689203	0.799765	AFUA_5G10340	Afu5G10340	MFS transporter; putative [Source:UniProtKB/TrEMBL
CADAFUAG00009483	87.7355	-0.924288	0.186587	-4.95367	7.28282e-07	6.07756e-06	AFUA_7G04500	Afu7G04500	ATP phosphoribosyltransferase His1; putative [Source:UniProtKB/TrEMBL
CADAFUAG00006095	1.74562	-0.92415	1.22587	-0.753875	0.450925	0.59996	AFUA_5G14600	Afu5G14600	Integral membrane protein [Source:UniProtKB/TrEMBL
CADAFUAG00005872	1242.14	-0.924086	0.310468	-2.97643	0.00291628	0.010228	AFUA_3G05440	Afu3G05440	DNA repair protein Rad18; putative [Source:UniProtKB/TrEMBL
CADAFUAG00002833	46.4595	-0.923395	0.250009	-3.69345	0.000221231	0.00107702	AFUA_5G02390	Afu5G02390	Auxin Efflux Carrier superfamily [Source:UniProtKB/TrEMBL
CADAFUAG00001904	8.42393	-0.92337	0.490227	-1.88356	0.0596252	0.126899	AFUA_6G06360	Afu6G06360	Mating alpha-pheromone PpgA [Source:UniProtKB/TrEMBL
CADAFUAG00008904	134.191	-0.922712	0.195578	-4.71788	2.38319e-06	1.8087e-05	AFUA_1G00610	Afu1G00610	Putative uncharacterized protein [Source:UniProtKB/TrEMBL
CADAFUAG00004307	21.9378	-0.922653	0.311834	-2.9588	0.00308839	0.0107618	AFUA_2G14410	Afu2G14410	Dioxygenase; putative [Source:UniProtKB/TrEMBL
CADAFUAG00008319	19.7269	-0.922512	0.321131	-2.8727	0.0040698	0.0135621	AFUA_4G09340	Afu4G09340	Putative uncharacterized protein [Source:UniProtKB/TrEMBL
CADAFUAG00007631	85.4377	-0.921724	0.332651	-2.77084	0.00559112	0.0178044	AFUA_1G16930	Afu1G16930	Phosphatidylserine decarboxylase; putative [Source:UniProtKB/TrEMBL
CADAFUAG00002218	12.5662	-0.920277	0.457083	-2.01337	0.0440758	0.0995829	AFUA_6G11750	Afu6G11750	C6 transcription factor; putative [Source:UniProtKB/TrEMBL
CADAFUAG00004920	19.0039	-0.91908	0.349561	-2.62924	0.00855753	0.0255203	AFUA_3G09040	Afu3G09040	Putative uncharacterized protein [Source:UniProtKB/TrEMBL
CADAFUAG00001373	103.107	-0.91854	0.275173	-3.33804	0.000843707	0.00345515	AFUA_4G03110	Afu4G03110	MFS monosaccharide transporter; putative [Source:UniProtKB/TrEMBL
CADAFUAG00001292	178.219	-0.917667	0.196918	-4.66016	3.15964e-06	2.34847e-05	AFUA_4G04560	Afu4G04560	GTP binding protein; putative [Source:UniProtKB/TrEMBL
CADAFUAG00001722	1.73549	-0.917329	1.25506	-0.730905	0.464837	0.612932	AFUA_6G11810	Afu6G11810	RTA1 domain protein; putative [Source:UniProtKB/TrEMBL
CADAFUAG00006870	633.533	-0.914631	0.249757	-3.66209	0.000250167	0.00120402	AFUA_1G15490	Afu1G15490	MFS multidrug transporter; putative [Source:UniProtKB/TrEMBL
CADAFUAG00005689	955.826	-0.914266	0.182516	-5.00922	5.46504e-07	4.65246e-06	AFUA_3G07120	Afu3G07120	MFS transporter; putative [Source:UniProtKB/TrEMBL
CADAFUAG00006525	2129.57	-0.914111	0.115328	-7.92615	2.26037e-15	5.45293e-14	AFUA_5G14830	Afu5G14830	Glyoxalase family protein [Source:UniProtKB/TrEMBL
CADAFUAG00008102	4350.58	-0.912806	0.237527	-3.84295	0.000121565	0.000636301	AFUA_4G11650	Afu4G11650	Alpha-ketoglutarate dehydrogenase complex subunit Kgd1; putative [Source:UniProtKB/TrEMBL
CADAFUAG00001180	279.459	-0.912624	0.180409	-5.05864	4.22268e-07	3.66217e-06	AFUA_7G00480	Afu7G00480	ABC multidrug transporter; putative [Source:UniProtKB/TrEMBL
CADAFUAG00008071	24.9888	-0.910965	0.329865	-2.76163	0.00575138	0.0182252	AFUA_4G10650	Afu4G10650	Putative uncharacterized protein [Source:UniProtKB/TrEMBL
CADAFUAG00000908	14.307	-0.910671	0.394384	-2.3091	0.0209382	0.0542128	AFUA_8G01150	Afu8G01150	C6 transcription factor; putative [Source:UniProtKB/TrEMBL
CADAFUAG00009105	226.229	-0.910463	0.242613	-3.75274	0.000174913	0.000880177	AFUA_1G03420	Afu1G03420	Adenylate kinase 2 [Source:UniProtKB/TrEMBL
CADAFUAG00008008	3313.84	-0.909117	0.148933	-6.10421	1.03313e-09	1.33566e-08	AFUA_4G11800	Afu4G11800	Alkaline protease 1 [Source:UniProtKB/Swiss-Prot
CADAFUAG00006141	350.661	-0.90826	0.203562	-4.46183	8.12625e-06	5.52471e-05	AFUA_5G05820	Afu5G05820	Homoserine kinase [Source:UniProtKB/TrEMBL
CADAFUAG00000762	23.0561	-0.90817	0.469612	-1.93387	0.0531286	0.115785	AFUA_8G00480	Afu8G00480	Phytanoyl-CoA dioxygenase family protein [Source:UniProtKB/TrEMBL
CADAFUAG00007196	66.0381	-0.907312	0.290098	-3.12761	0.00176237	0.00655963	AFUA_1G11790	Afu1G11790	Nucleoside hydrolase; putative [Source:UniProtKB/TrEMBL
CADAFUAG00003446	1864.97	-0.906961	0.194252	-4.66898	3.02693e-06	2.255e-05	AFUA_2G01040	Afu2G01040	Formaldehyde dehydrogenase [Source:UniProtKB/TrEMBL
CADAFUAG00001267	28862.3	-0.906581	0.137315	-6.6022	4.05111e-11	6.20234e-10	AFUA_4G03010	Afu4G03010	Putative uncharacterized protein [Source:UniProtKB/TrEMBL
CADAFUAG00009841	1.8117	-0.906421	1.00872	-0.898582	0.368875	0.519891	AFUA_4G08895	Afu4G08895
CADAFUAG00007686	874.268	-0.906213	0.125692	-7.2098	5.60337e-13	1.06398e-11	AFUA_1G16980	Afu1G16980	Putative uncharacterized protein [Source:UniProtKB/TrEMBL
CADAFUAG00008616	2438.02	-0.905394	0.199629	-4.53538	5.74986e-06	4.03611e-05	AFUA_1G05400	Afu1G05400	Putative uncharacterized protein [Source:UniProtKB/TrEMBL
CADAFUAG00005774	82.0453	-0.904972	0.254604	-3.55443	0.000378796	0.0017322	AFUA_3G08560	Afu3G08560	Cation transport protein ChaC; putative [Source:UniProtKB/TrEMBL
CADAFUAG00007020	205.025	-0.90457	0.273693	-3.30505	0.000949605	0.00383073	AFUA_1G17180	Afu1G17180	Pyridine nucleotide-disulphide oxidoreductase AMID-like; putative [Source:UniProtKB/TrEMBL
CADAFUAG00005145	2926.81	-0.904398	0.192911	-4.68815	2.75683e-06	2.06805e-05	AFUA_3G13080	Afu3G13080	Putative uncharacterized protein [Source:UniProtKB/TrEMBL
CADAFUAG00005694	216.307	-0.904338	0.163803	-5.5209	3.37263e-08	3.45144e-07	AFUA_3G09870	Afu3G09870	Putative uncharacterized protein [Source:UniProtKB/TrEMBL
CADAFUAG00004013	422.166	-0.902701	0.126007	-7.1639	7.84114e-13	1.46037e-11	AFUA_2G12190	Afu2G12190	Mitochondrial import inner membrane translocase subunit tim13 [Source:UniProtKB/Swiss-Prot
CADAFUAG00006768	314.603	-0.902242	0.248092	-3.63672	0.000276131	0.00131402	AFUA_5G13060	Afu5G13060	DUF1275 domain protein [Source:UniProtKB/TrEMBL
CADAFUAG00003744	3509.11	-0.900337	0.144486	-6.2313	4.62583e-10	6.26356e-09	AFUA_2G01410	Afu2G01410	Aldo-keto reductase; putative [Source:UniProtKB/TrEMBL
CADAFUAG00002535	546.999	-0.899548	0.16313	-5.5143	3.50179e-08	3.57609e-07	AFUA_5G01630	Afu5G01630	MFS multidrug transporter; putative [Source:UniProtKB/TrEMBL
CADAFUAG00006850	80.7158	-0.898516	0.253373	-3.54623	0.000390791	0.00177702	AFUA_1G17420	Afu1G17420	Putative uncharacterized protein [Source:UniProtKB/TrEMBL
CADAFUAG00000750	142.059	-0.897787	0.208602	-4.30383	1.67869e-05	0.00010737	AFUA_6G03900	Afu6G03900	F-box domain protein [Source:UniProtKB/TrEMBL
CADAFUAG00003368	7.90274	-0.897243	0.571099	-1.57108	0.116164	0.217349	AFUA_2G06160	Afu2G06160	Alpha-1;3-glucanase/mutanase; putative [Source:UniProtKB/TrEMBL
CADAFUAG00005241	224.727	-0.895533	0.133227	-6.72184	1.79449e-11	2.88541e-10	AFUA_3G08670	Afu3G08670	Integral membrane protein [Source:UniProtKB/TrEMBL
CADAFUAG00002358	94.9651	-0.895367	0.246591	-3.63098	0.000282343	0.00133865	AFUA_6G10710	Afu6G10710	Putative uncharacterized protein [Source:UniProtKB/TrEMBL
CADAFUAG00008776	665.44	-0.89516	0.239264	-3.74131	0.000183064	0.000914626	AFUA_1G01610	Afu1G01610	Putative uncharacterized protein [Source:UniProtKB/TrEMBL
CADAFUAG00003097	10.5753	-0.894447	0.594778	-1.50383	0.132624	0.241695	AFUA_8G04710	Afu8G04710	Xylosidase; putative [Source:UniProtKB/TrEMBL
CADAFUAG00002745	1544.6	-0.893673	0.132462	-6.74662	1.51328e-11	2.46847e-10	AFUA_5G02700	Afu5G02700	MFS multidrug transporter; putative [Source:UniProtKB/TrEMBL
CADAFUAG00008744	158.666	-0.893659	0.187215	-4.77345	1.81099e-06	1.39845e-05	AFUA_1G06470	Afu1G06470	Neutral/alkaline nonlysosomal ceramidase; putative [Source:UniProtKB/TrEMBL
CADAFUAG00002513	488.533	-0.893275	0.25499	-3.50318	0.000459743	0.00204186	AFUA_4G00490	Afu4G00490	Putative uncharacterized protein [Source:UniProtKB/TrEMBL
CADAFUAG00003989	15.2068	-0.892836	0.607657	-1.46931	0.141749	0.254024	AFUA_2G13390	Afu2G13390	MFS transporter; putative [Source:UniProtKB/TrEMBL
CADAFUAG00007303	129.242	-0.892745	0.284266	-3.14053	0.00168641	0.00632292	AFUA_1G15540	Afu1G15540	Putative uncharacterized protein [Source:UniProtKB/TrEMBL
CADAFUAG00000169	0.361601	-0.892638	2.6367	-0.338544	0.734953	0.833164	AFUA_3G02120	Afu3G02120	Short-chain dehydrogenase/reductase family protein; putative [Source:UniProtKB/TrEMBL
CADAFUAG00000799	243867	-0.89168	0.110924	-8.03869	9.08019e-16	2.32923e-14	AFUA_8G01690	Afu8G01690	Putative uncharacterized protein [Source:UniProtKB/TrEMBL
CADAFUAG00007136	10.6424	-0.891576	0.458223	-1.94573	0.0516876	0.113305	AFUA_1G14190	Afu1G14190	DUF614 domain protein [Source:UniProtKB/TrEMBL
CADAFUAG00001678	2.1517	-0.890871	1.07518	-0.828582	0.407341	0.559504	AFUA_6G11970	Afu6G11970	WSC domain protein; putative [Source:UniProtKB/TrEMBL
CADAFUAG00006854	3474.51	-0.890335	0.264547	-3.3655	0.00076404	0.00318525	AFUA_1G13800	Afu1G13800	MFS multidrug transporter; putative [Source:UniProtKB/TrEMBL
CADAFUAG00002180	1309.99	-0.889781	0.219119	-4.06072	4.89209e-05	0.000281093	AFUA_6G12440	Afu6G12440	Putative uncharacterized protein [Source:UniProtKB/TrEMBL
CADAFUAG00002417	43.9207	-0.889691	0.286687	-3.10336	0.00191339	0.00707299	AFUA_4G01280	Afu4G01280	Putative uncharacterized protein [Source:UniProtKB/TrEMBL
CADAFUAG00008128	0.402079	-0.888783	2.56995	-0.345837	0.729465	0.828841	AFUA_4G06430	Afu4G06430	Putative uncharacterized protein [Source:UniProtKB/TrEMBL
CADAFUAG00000143	156.679	-0.888604	0.208141	-4.26924	1.96136e-05	0.00012374	AFUA_3G00800	Afu3G00800	Oxidoreductase; 2OG-Fe(II) oxygenase family; putative [Source:UniProtKB/TrEMBL
CADAFUAG00003870	209.206	-0.887447	0.18015	-4.92614	8.38683e-07	6.89237e-06	AFUA_2G02360	Afu2G02360	UDP-glucose:glycoprotein glucosyltransferase; putative [Source:UniProtKB/TrEMBL
CADAFUAG00008176	2842.83	-0.887259	0.177005	-5.01261	5.36965e-07	4.58733e-06	AFUA_4G11580	Afu4G11580	Superoxide dismutase [Source:UniProtKB/TrEMBL
CADAFUAG00005948	172.656	-0.886936	0.245076	-3.61902	0.000295721	0.00139495	AFUA_5G10620	Afu5G10620	Histone-like transcription factor; putative [Source:UniProtKB/TrEMBL
CADAFUAG00001834	12.1877	-0.886463	0.454215	-1.95164	0.0509814	0.111984	AFUA_6G09040	Afu6G09040	Probable feruloyl esterase B-2 [Source:UniProtKB/Swiss-Prot
CADAFUAG00004167	4150.73	-0.885719	0.248666	-3.56188	0.000368209	0.00169174	AFUA_2G09480	Afu2G09480	Putative uncharacterized protein [Source:UniProtKB/TrEMBL
CADAFUAG00001727	480.707	-0.885231	0.193413	-4.57688	4.71951e-06	3.39121e-05	AFUA_6G10940	Afu6G10940	Putative uncharacterized protein [Source:UniProtKB/TrEMBL
CADAFUAG00005275	392.76	-0.884376	0.205268	-4.30839	1.64445e-05	0.000105449	AFUA_3G10090	Afu3G10090	Dihydroneopterin aldolase domain protein [Source:UniProtKB/TrEMBL
CADAFUAG00001009	3.65942	-0.883486	0.769979	-1.14742	0.25121	0.391702	AFUA_8G02020	Afu8G02020	Glycosyltransferase; putative [Source:UniProtKB/TrEMBL
CADAFUAG00002427	5.43277	-0.883434	0.741597	-1.19126	0.233552	0.371619	AFUA_4G01080	Afu4G01080	MFS multidrug transporter; putative [Source:UniProtKB/TrEMBL
CADAFUAG00003491	126.105	-0.883172	0.221528	-3.98673	6.69902e-05	0.00037344	AFUA_2G04980	Afu2G04980	Tyrosine decarboxylase; putative [Source:UniProtKB/TrEMBL
CADAFUAG00000011	31.9187	-0.882198	0.262162	-3.36509	0.000765193	0.00318732	AFUA_3G01960	Afu3G01960	Putative uncharacterized protein [Source:UniProtKB/TrEMBL
CADAFUAG00009782	0.536573	-0.881895	2.96408	-0.297527	0.766064	0.856744	AFUA_5G12868	Afu5G12868
CADAFUAG00008030	313.911	-0.881244	0.149213	-5.90594	3.50643e-09	4.23999e-08	AFUA_4G09210	Afu4G09210	Phosphate transporter [Source:UniProtKB/TrEMBL
CADAFUAG00001118	11.7794	-0.880467	0.888647	-0.990795	0.321786	0.471855	AFUA_7G00670	Afu7G00670	Chitin binding domain protein Peritrophin-A; putative [Source:UniProtKB/TrEMBL
CADAFUAG00001686	4.60265	-0.880371	0.614273	-1.43319	0.151803	0.267749	AFUA_6G09360	Afu6G09360	Proline-glycine rich protein; putative [Source:UniProtKB/TrEMBL
CADAFUAG00009175	60836.7	-0.879938	0.176778	-4.97763	6.43669e-07	5.42266e-06	AFUA_1G03040	Afu1G03040	Putative uncharacterized protein [Source:UniProtKB/TrEMBL
CADAFUAG00007641	235.683	-0.879881	0.25444	-3.45811	0.000543975	0.00237047	AFUA_1G12850	Afu1G12850	Nitrate transporter CrnA [Source:UniProtKB/TrEMBL
CADAFUAG00003569	160.691	-0.879808	0.256177	-3.43438	0.000593911	0.00255713	AFUA_2G01100	Afu2G01100	Pirin domain protein; putative [Source:UniProtKB/TrEMBL
CADAFUAG00001063	129.089	-0.878406	0.327882	-2.67903	0.00738352	0.0225448	AFUA_7G01690	Afu7G01690	Acetamidase; putative [Source:UniProtKB/TrEMBL
CADAFUAG00006209	378.964	-0.87832	0.241243	-3.6408	0.000271788	0.00129589	AFUA_5G07960	Afu5G07960	C2H2 finger and ankyrin domain protein; putative [Source:UniProtKB/TrEMBL
CADAFUAG00007041	46.9506	-0.877369	0.278163	-3.15415	0.00160967	0.00607735	AFUA_1G17360	Afu1G17360	BZIP transcription factor (BACH2); putative [Source:UniProtKB/TrEMBL
CADAFUAG00002909	598.983	-0.876461	0.361297	-2.42588	0.0152715	0.041588	AFUA_5G00670	Afu5G00670	Beta-galactosidase; putative [Source:UniProtKB/TrEMBL
CADAFUAG00004489	284.46	-0.876094	0.226405	-3.86958	0.000109023	0.000577298	AFUA_2G15140	Afu2G15140	MFS drug transporter; putative [Source:UniProtKB/TrEMBL
CADAFUAG00005673	677.691	-0.875294	0.0911619	-9.60154	7.87621e-22	3.62903e-20	AFUA_3G06600	Afu3G06600	Siroheme synthase; putative [Source:UniProtKB/TrEMBL
CADAFUAG00005963	0.557311	-0.874589	2.00665	-0.435845	0.662949	0.780289	AFUA_5G14630	Afu5G14630	Putative uncharacterized protein [Source:UniProtKB/TrEMBL
CADAFUAG00002564	130.431	-0.873852	0.208593	-4.18926	2.79866e-05	0.000170694	AFUA_5G04040	Afu5G04040	Long chronological lifespan protein 2 [Source:UniProtKB/Swiss-Prot
CADAFUAG00008555	10.5181	-0.87337	0.479029	-1.82321	0.0682716	0.141582	AFUA_4G13220	Afu4G13220	Putative uncharacterized protein [Source:UniProtKB/TrEMBL
CADAFUAG00004074	147.234	-0.873336	0.181006	-4.82491	1.40065e-06	1.10982e-05	AFUA_2G17490	Afu2G17490	Flavin-binding monooxygenase; putative [Source:UniProtKB/TrEMBL
CADAFUAG00000109	214.812	-0.873046	0.19117	-4.56685	4.95101e-06	3.5237e-05	AFUA_3G00230	Afu3G00230	Beta-glucosidase; putative [Source:UniProtKB/TrEMBL
CADAFUAG00000245	327.101	-0.872559	0.120949	-7.2143	5.4214e-13	1.03145e-11	AFUA_3G04030	Afu3G04030	Succinyl-CoA:3-ketoacid-coenzyme A transferase [Source:UniProtKB/TrEMBL
CADAFUAG00000438	403.042	-0.872139	0.103897	-8.39424	4.68925e-17	1.37731e-15	AFUA_6G04970	Afu6G04970	Phosphoserine aminotransferase [Source:UniProtKB/TrEMBL
CADAFUAG00003217	71.7436	-0.871777	0.209083	-4.16952	3.05235e-05	0.000184884	AFUA_8G04240	Afu8G04240	Origin recognition complex subunit 3; putative [Source:UniProtKB/TrEMBL
CADAFUAG00000487	561.01	-0.871187	0.21504	-4.05128	5.09372e-05	0.000291988	AFUA_6G03660	Afu6G03660	Onanonoxo-7-onima-8-eninoihtemlysoneda [Source:UniProtKB/TrEMBL
CADAFUAG00001465	44.133	-0.870344	0.253444	-3.43407	0.000594587	0.00255778	AFUA_4G03150	Afu4G03150	MGMT family protein [Source:UniProtKB/TrEMBL
CADAFUAG00000787	15.5742	-0.870072	0.510438	-1.70456	0.0882769	0.174824	AFUA_8G00140	Afu8G00140	MFS transporter; putative [Source:UniProtKB/TrEMBL
CADAFUAG00003892	9739.13	-0.869869	0.0938737	-9.26638	1.92567e-20	7.86611e-19	AFUA_2G01170	Afu2G01170	1;3-beta-glucanosyltransferase gel1 [Source:UniProtKB/Swiss-Prot
CADAFUAG00006801	76.8265	-0.86891	0.178593	-4.8653	1.14283e-06	9.22804e-06	AFUA_5G07980	Afu5G07980	Putative uncharacterized protein [Source:UniProtKB/TrEMBL
CADAFUAG00001808	1.98868	-0.868269	0.993302	-0.874124	0.382051	0.53374	AFUA_6G09890	Afu6G09890	Putative uncharacterized protein [Source:UniProtKB/TrEMBL
CADAFUAG00009198	681.827	-0.868165	0.110469	-7.85893	3.87415e-15	9.14187e-14	AFUA_1G02620	Afu1G02620	Putative uncharacterized protein [Source:UniProtKB/TrEMBL
CADAFUAG00006366	477.902	-0.86793	0.226597	-3.83028	0.000127996	0.000668302	AFUA_5G05650	Afu5G05650	Putative uncharacterized protein [Source:UniProtKB/TrEMBL
CADAFUAG00002763	100.762	-0.867888	0.17454	-4.97243	6.6119e-07	5.55582e-06	AFUA_5G04350	Afu5G04350	Putative uncharacterized protein [Source:UniProtKB/TrEMBL
CADAFUAG00006667	112.264	-0.86745	0.251143	-3.454	0.000552333	0.00240151	AFUA_5G10220	Afu5G10220	Alcohol dehydrogenase; zinc-containing; putative [Source:UniProtKB/TrEMBL
CADAFUAG00000857	2044.85	-0.866449	0.216592	-4.00036	6.32449e-05	0.000354799	AFUA_8G00840	Afu8G00840	Amino acid permease; putative [Source:UniProtKB/TrEMBL
CADAFUAG00003951	273.46	-0.866424	0.326434	-2.65421	0.00794942	0.0240088	AFUA_2G15810	Afu2G15810	Putative uncharacterized protein [Source:UniProtKB/TrEMBL
CADAFUAG00008024	12.1043	-0.865953	0.536649	-1.61363	0.106607	0.203502	AFUA_4G13610	Afu4G13610	Putative uncharacterized protein [Source:UniProtKB/TrEMBL
CADAFUAG00009445	907.958	-0.865756	0.134987	-6.41363	1.42096e-10	2.01672e-09	AFUA_7G05390	Afu7G05390	Mitochondrial carrier protein; putative [Source:UniProtKB/TrEMBL
CADAFUAG00007601	670.549	-0.865698	0.25101	-3.44886	0.000562954	0.00244223	AFUA_1G11800	Afu1G11800	HLH transcription factor; putative [Source:UniProtKB/TrEMBL
CADAFUAG00002600	284.2	-0.865491	0.170313	-5.08178	3.73912e-07	3.28778e-06	AFUA_5G02930	Afu5G02930	Lysophospholipase; putative [Source:UniProtKB/TrEMBL
CADAFUAG00006645	950.188	-0.865196	0.139014	-6.22381	4.8524e-10	6.55209e-09	AFUA_5G10510	Afu5G10510	ABC transporter; putative [Source:UniProtKB/TrEMBL
CADAFUAG00000489	626.662	-0.865113	0.14885	-5.81198	6.17383e-09	7.17109e-08	AFUA_6G04820	Afu6G04820	Para-aminobenzoate synthase PabaA [Source:UniProtKB/TrEMBL
CADAFUAG00000320	117.283	-0.865076	0.232888	-3.71456	0.000203556	0.00099969	AFUA_3G01840	Afu3G01840	MFS transporter; putative [Source:UniProtKB/TrEMBL
CADAFUAG00009218	247.079	-0.864568	0.147456	-5.86323	4.53951e-09	5.41089e-08	AFUA_1G04420	Afu1G04420	Putative uncharacterized protein [Source:UniProtKB/TrEMBL
CADAFUAG00004195	203.568	-0.864126	0.148434	-5.82163	5.82756e-09	6.81776e-08	AFUA_2G13470	Afu2G13470	Pyrimidine 5'-nucleotidase; putative [Source:UniProtKB/TrEMBL
CADAFUAG00004017	69.2921	-0.863571	0.194648	-4.43657	9.14035e-06	6.13691e-05	AFUA_2G12780	Afu2G12780	von Willebrand domain protein [Source:UniProtKB/TrEMBL
CADAFUAG00009296	384.957	-0.863536	0.109125	-7.91325	2.50764e-15	5.98999e-14	AFUA_1G03030	Afu1G03030	Putative uncharacterized protein [Source:UniProtKB/TrEMBL
CADAFUAG00009282	151.602	-0.863514	0.169797	-5.08556	3.66535e-07	3.22776e-06	AFUA_1G01450	Afu1G01450	Toxin biosynthesis protein; putative [Source:UniProtKB/TrEMBL
CADAFUAG00004419	441.386	-0.863484	0.134809	-6.40522	1.50151e-10	2.11255e-09	AFUA_2G12370	Afu2G12370	Required for respiratory growth protein 9; mitochondrial [Source:UniProtKB/Swiss-Prot
CADAFUAG00007285	546.368	-0.862404	0.132656	-6.50106	7.97581e-11	1.18383e-09	AFUA_1G10980	Afu1G10980	Sphingosine kinase (SphK); putative [Source:UniProtKB/TrEMBL
CADAFUAG00006109	609.217	-0.861996	0.158529	-5.43747	5.40413e-08	5.41638e-07	AFUA_5G08965	Afu5G08965	Cytochrome c oxidase assembly protein (Pet191); putative [Source:UniProtKB/TrEMBL
CADAFUAG00002116	21.3992	-0.86186	0.396046	-2.17616	0.0295431	0.0722016	AFUA_6G09292	Afu6G09292	Putative uncharacterized protein [Source:UniProtKB/TrEMBL
CADAFUAG00001541	0.503642	-0.861569	2.09155	-0.411928	0.680392	0.793929	AFUA_6G00150	Afu6G00150
CADAFUAG00008320	156.542	-0.861561	0.208877	-4.12472	3.71185e-05	0.00021975	AFUA_4G14410	Afu4G14410	Putative uncharacterized protein [Source:UniProtKB/TrEMBL
CADAFUAG00006125	19.6241	-0.860846	0.331882	-2.59383	0.00949127	0.027869	AFUA_5G12450	Afu5G12450	Putative uncharacterized protein [Source:UniProtKB/TrEMBL
CADAFUAG00008837	3002.72	-0.859473	0.137285	-6.26051	3.83722e-10	5.23218e-09	AFUA_1G03600	Afu1G03600	Probable glucan 1;3-beta-glucosidase A [Source:UniProtKB/Swiss-Prot
CADAFUAG00009071	51.6698	-0.858517	0.340905	-2.51835	0.0117907	0.0333806	AFUA_1G03270	Afu1G03270	Putative uncharacterized protein [Source:UniProtKB/TrEMBL
CADAFUAG00002690	18.5097	-0.857204	0.362414	-2.36526	0.0180173	0.0479246	AFUA_5G02300	Afu5G02300	Peroxidase; putative [Source:UniProtKB/TrEMBL
CADAFUAG00003439	11.3992	-0.85562	0.498363	-1.71686	0.0860043	0.171024	AFUA_2G02410	Afu2G02410	Putative uncharacterized protein [Source:UniProtKB/TrEMBL
CADAFUAG00001453	32.4451	-0.854513	0.285083	-2.99742	0.00272274	0.00964315	AFUA_4G02870	Afu4G02870	2-ketogluconate transporter; putative [Source:UniProtKB/TrEMBL
CADAFUAG00004429	378.311	-0.85384	0.145008	-5.88821	3.90405e-09	4.70908e-08	AFUA_2G11570	Afu2G11570	F-box domain protein [Source:UniProtKB/TrEMBL
CADAFUAG00006256	902.609	-0.853655	0.285486	-2.99018	0.00278813	0.00983535	AFUA_5G06070	Afu5G06070	ABC multidrug transporter Mdr1 [Source:UniProtKB/TrEMBL
CADAFUAG00000601	507.835	-0.853431	0.157379	-5.42276	5.86856e-08	5.8517e-07	AFUA_6G05270	Afu6G05270	Putative uncharacterized protein [Source:UniProtKB/TrEMBL
CADAFUAG00000062	9.1758	-0.853279	0.524654	-1.62636	0.103872	0.199456	AFUA_3G03480	Afu3G03480	Cytochrome P450 monooxygenase; putative [Source:UniProtKB/TrEMBL
CADAFUAG00001759	77.878	-0.852096	0.434762	-1.95991	0.0500059	0.110354	AFUA_6G07920	Afu6G07920	Acetyltransferase; GNAT family family [Source:UniProtKB/TrEMBL
CADAFUAG00008600	30.2995	-0.85205	0.26535	-3.21104	0.00132255	0.00511855	AFUA_1G06650	Afu1G06650	Actin filament organization protein App1-like; putative [Source:UniProtKB/TrEMBL
CADAFUAG00008257	63.9273	-0.851043	0.32809	-2.59393	0.00948845	0.027869	AFUA_4G09920	Afu4G09920	Putative uncharacterized protein [Source:UniProtKB/TrEMBL
CADAFUAG00000982	4.68108	-0.850734	0.704413	-1.20772	0.227155	0.364362	AFUA_8G00150	Afu8G00150	Putative uncharacterized protein [Source:UniProtKB/TrEMBL
CADAFUAG00007117	28.1368	-0.850475	0.346823	-2.45219	0.0141991	0.0391837	AFUA_1G10020	Afu1G10020	Ribonuclease H1; putative [Source:UniProtKB/TrEMBL
CADAFUAG00006106	9.15401	-0.850405	0.553105	-1.53751	0.124168	0.229637	AFUA_5G07550	Afu5G07550	Putative uncharacterized protein [Source:UniProtKB/TrEMBL
CADAFUAG00003886	14.2492	-0.848541	0.412028	-2.05942	0.0394536	0.0913632	AFUA_2G05270	Afu2G05270	Putative uncharacterized protein [Source:UniProtKB/TrEMBL
CADAFUAG00000726	0.37598	-0.848484	2.56192	-0.331191	0.7405	0.836429	AFUA_6G03270	Afu6G03270	Putative uncharacterized protein [Source:UniProtKB/TrEMBL
CADAFUAG00006795	173.648	-0.848427	0.197607	-4.2935	1.75877e-05	0.00011205	AFUA_5G07160	Afu5G07160	DUF636 domain protein [Source:UniProtKB/TrEMBL
CADAFUAG00009025	0.379284	-0.848403	2.55643	-0.33187	0.739987	0.836141	AFUA_1G03230	Afu1G03230	ABC multidrug transporter; putative [Source:UniProtKB/TrEMBL
CADAFUAG00000299	0.284829	-0.847887	3.32019	-0.255373	0.798435	0.878794	AFUA_3G02110	Afu3G02110	MFS multidrug transporter; putative [Source:UniProtKB/TrEMBL
CADAFUAG00002141	307.712	-0.847456	0.177004	-4.78777	1.68645e-06	1.31166e-05	AFUA_6G12640	Afu6G12640	Putative uncharacterized protein [Source:UniProtKB/TrEMBL
CADAFUAG00004326	293.515	-0.846913	0.201424	-4.20463	2.61509e-05	0.000160606	AFUA_2G08520	Afu2G08520	50S ribosomal protein L14 [Source:UniProtKB/TrEMBL
CADAFUAG00007782	28.3068	-0.846342	0.288507	-2.93352	0.0033514	0.0115173	AFUA_4G08210	Afu4G08210	GNAT family acetyltransferase Nat4; putative [Source:UniProtKB/TrEMBL
CADAFUAG00001383	192.616	-0.846124	0.224642	-3.76655	0.000165519	0.000838548	AFUA_4G03100	Afu4G03100	Ras-like GTP-binding protein; putative [Source:UniProtKB/TrEMBL
CADAFUAG00008006	17.2038	-0.845839	0.467154	-1.81062	0.0701996	0.144839	AFUA_4G11060	Afu4G11060	MFS transporter; putative [Source:UniProtKB/TrEMBL
CADAFUAG00001427	463.872	-0.845728	0.126786	-6.67049	2.54952e-11	4.01074e-10	AFUA_4G04180	Afu4G04180	Chitin synthase B [Source:UniProtKB/TrEMBL
CADAFUAG00000345	0.294609	-0.844523	2.70984	-0.311651	0.755306	0.848323	AFUA_3G01220	Afu3G01220	Probable aspartic-type endopeptidase AFUA_3G01220 [Source:UniProtKB/Swiss-Prot
CADAFUAG00009376	125.087	-0.843626	0.235899	-3.57622	0.000348602	0.00161386	AFUA_7G04590	Afu7G04590	Telomerase reverse transcriptase; putative [Source:UniProtKB/TrEMBL
CADAFUAG00003273	628.744	-0.842472	0.259021	-3.25252	0.00114387	0.00452246	AFUA_8G05770	Afu8G05770	Putative uncharacterized protein [Source:UniProtKB/TrEMBL
CADAFUAG00000210	255.802	-0.842188	0.16433	-5.12499	2.97547e-07	2.66367e-06	AFUA_3G02910	Afu3G02910	Dihydroxy-acetone synthase; putative [Source:UniProtKB/TrEMBL
CADAFUAG00009812	0.335087	-0.842116	2.62332	-0.321012	0.748202	0.842095	AFUA_5G13625	Afu5G13625
CADAFUAG00008546	45.0276	-0.841982	0.288831	-2.91514	0.00355525	0.0120685	AFUA_4G07950	Afu4G07950	Putative uncharacterized protein [Source:UniProtKB/TrEMBL
CADAFUAG00007644	213.657	-0.839919	0.361202	-2.32534	0.0200537	0.0523388	AFUA_1G14480	Afu1G14480	Putative uncharacterized protein [Source:UniProtKB/TrEMBL
CADAFUAG00006653	166.675	-0.839396	0.165179	-5.08172	3.74027e-07	3.28778e-06	AFUA_5G12930	Afu5G12930	C6 finger domain protein; putative [Source:UniProtKB/TrEMBL
CADAFUAG00002893	1198.04	-0.83887	0.30034	-2.79307	0.00522106	0.0167743	AFUA_5G03140	Afu5G03140	GTP cyclohydrolase I; putative [Source:UniProtKB/TrEMBL
CADAFUAG00006549	95.7624	-0.837116	0.246427	-3.39702	0.000681244	0.00287834	AFUA_5G14270	Afu5G14270	AMP-binding enzyme; putative [Source:UniProtKB/TrEMBL
CADAFUAG00003492	966.522	-0.837039	0.130135	-6.43209	1.25858e-10	1.8047e-09	AFUA_2G00220	Afu2G00220	Aminopeptidase; putative [Source:UniProtKB/TrEMBL
CADAFUAG00004635	149.89	-0.836901	0.167316	-5.00193	5.67581e-07	4.81503e-06	AFUA_2G11350	Afu2G11350	Peroxisomal 3-ketoacyl-coA thiolase (Kat1); putative [Source:UniProtKB/TrEMBL
CADAFUAG00002222	124.753	-0.836763	0.162678	-5.14369	2.69396e-07	2.43634e-06	AFUA_6G12780	Afu6G12780	Putative uncharacterized protein [Source:UniProtKB/TrEMBL
CADAFUAG00005991	163.082	-0.836557	0.185027	-4.52127	6.14694e-06	4.28391e-05	AFUA_5G08350	Afu5G08350	37S ribosomal protein S16 [Source:UniProtKB/TrEMBL
CADAFUAG00005653	102.735	-0.836505	0.268177	-3.11923	0.00181327	0.00673617	AFUA_3G12930	Afu3G12930	7-dimethylallyltryptophan synthase [Source:UniProtKB/Swiss-Prot
CADAFUAG00002726	8.42516	-0.836433	0.581961	-1.43727	0.150642	0.266329	AFUA_5G01040	Afu5G01040	Oxidoreductase; short-chain dehydrogenase/reductase family; putative [Source:UniProtKB/TrEMBL
CADAFUAG00005913	86.7986	-0.835953	0.185068	-4.51701	6.2719e-06	4.35539e-05	AFUA_5G11120	Afu5G11120	DNA-directed RNA polymerases i; ii; and iii 145 kDa polypeptide [Source:UniProtKB/TrEMBL
CADAFUAG00002792	100.519	-0.835267	0.204121	-4.09203	4.27616e-05	0.000248641	AFUA_5G02270	Afu5G02270	C6 transcription factor; putative [Source:UniProtKB/TrEMBL
CADAFUAG00006869	363.466	-0.835109	0.131543	-6.34854	2.17368e-10	3.01893e-09	AFUA_1G09750	Afu1G09750	Aldehyde reductase (AKR1); putative [Source:UniProtKB/TrEMBL
CADAFUAG00004323	2.13307	-0.835023	0.930161	-0.897719	0.369335	0.520313	AFUA_2G15270	Afu2G15270	Putative uncharacterized protein [Source:UniProtKB/TrEMBL
CADAFUAG00004556	1218.2	-0.834283	0.189662	-4.39879	1.08854e-05	7.20901e-05	AFUA_2G09230	Afu2G09230	ATP-dependent RNA helicase (Hrh1); putative [Source:UniProtKB/TrEMBL
CADAFUAG00003425	601.636	-0.833309	0.113953	-7.31277	2.61688e-13	5.23483e-12	AFUA_2G06230	Afu2G06230	Imidazole glycerol phosphate synthase subunit hisF [Source:UniProtKB/TrEMBL
CADAFUAG00007375	386.792	-0.833141	0.182342	-4.56912	4.89776e-06	3.49347e-05	AFUA_1G09850	Afu1G09850	37S ribosomal protein S11; putative [Source:UniProtKB/TrEMBL
CADAFUAG00007697	1326.78	-0.83303	0.294327	-2.83029	0.0046506	0.0152335	AFUA_1G11380	Afu1G11380	Integral membrane protein; putative [Source:UniProtKB/TrEMBL
CADAFUAG00000858	115.007	-0.832977	0.426209	-1.95439	0.0506554	0.111472	AFUA_8G02490	Afu8G02490	Putative uncharacterized protein [Source:UniProtKB/TrEMBL
CADAFUAG00006491	0.170558	-0.832767	3.81205	-0.218457	0.827073	0.89931	AFUA_5G13160	Afu5G13160	MFS transporter; putative [Source:UniProtKB/TrEMBL
CADAFUAG00001629	35.7966	-0.830857	0.31064	-2.67466	0.00748048	0.0227907	AFUA_6G07650	Afu6G07650	Putative uncharacterized protein [Source:UniProtKB/TrEMBL
CADAFUAG00005567	45.2988	-0.829972	0.283306	-2.9296	0.00339403	0.0116074	AFUA_3G13600	Afu3G13600	C6 transcription factor; putative [Source:UniProtKB/TrEMBL
CADAFUAG00007594	12.555	-0.82885	0.492681	-1.68233	0.0925058	0.181685	AFUA_1G11040	Afu1G11040	Putative uncharacterized protein [Source:UniProtKB/TrEMBL
CADAFUAG00008759	25.3232	-0.828089	0.350796	-2.3606	0.0182454	0.0483987	AFUA_1G03360	Afu1G03360	Putative uncharacterized protein [Source:UniProtKB/TrEMBL
CADAFUAG00008943	1048.9	-0.827863	0.228478	-3.62337	0.000290785	0.00137567	AFUA_1G00470	Afu1G00470	Betaine aldehyde dehydrogenase; putative [Source:UniProtKB/TrEMBL
CADAFUAG00002394	9.66841	-0.827378	0.49683	-1.66531	0.0958503	0.18697	AFUA_4G00870	Afu4G00870	Antigenic cell wall galactomannoprotein; putative [Source:UniProtKB/TrEMBL
CADAFUAG00003414	15.896	-0.826363	0.408804	-2.02142	0.0432368	0.098067	AFUA_2G00600	Afu2G00600	Putative uncharacterized protein [Source:UniProtKB/TrEMBL
CADAFUAG00000729	258.971	-0.82615	0.259546	-3.18305	0.00145731	0.00556918	AFUA_6G04050	Afu6G04050	Cell division cycle protein 123 [Source:UniProtKB/Swiss-Prot
CADAFUAG00003144	204.485	-0.825585	0.196893	-4.19308	2.75198e-05	0.000168058	AFUA_8G07110	Afu8G07110	Alanyl-tRNA synthetase; putative [Source:UniProtKB/TrEMBL
CADAFUAG00004880	385.157	-0.825391	0.291419	-2.83232	0.00462113	0.0151472	AFUA_2G13175	Afu2G13175	Putative uncharacterized protein [Source:UniProtKB/TrEMBL
CADAFUAG00008818	1962.29	-0.825105	0.0932015	-8.85292	8.52598e-19	2.97095e-17	AFUA_1G03680	Afu1G03680	Putative uncharacterized protein [Source:UniProtKB/TrEMBL
CADAFUAG00009565	685.899	-0.823771	0.238744	-3.45043	0.000559689	0.00242915	AFUA_7G03850	Afu7G03850	Oxidoreductase; 2-nitropropane dioxygenase family; putative [Source:UniProtKB/TrEMBL
CADAFUAG00002954	321.048	-0.822924	0.277354	-2.96705	0.00300669	0.010511	AFUA_8G04340	Afu8G04340	Cystathionine gamma-lyase [Source:UniProtKB/TrEMBL
CADAFUAG00009692	1.22027	-0.822452	1.9934	-0.412588	0.679908	0.793759	AFUA_3G00495	Afu3G00495
CADAFUAG00003343	368.771	-0.820866	0.126553	-6.48634	8.79493e-11	1.28772e-09	AFUA_2G02350	Afu2G02350	MYB DNA-binding domain protein [Source:UniProtKB/TrEMBL
CADAFUAG00002540	147.906	-0.819049	0.27768	-2.94961	0.00318174	0.0110396	AFUA_5G01380	Afu5G01380	Putative uncharacterized protein [Source:UniProtKB/TrEMBL
CADAFUAG00008644	124.267	-0.81851	1.45078	-0.564186	0.572627	0.70783	AFUA_1G01060	Afu1G01060
CADAFUAG00000082	0.338488	-0.818489	3.16006	-0.259011	0.795627	0.877193	AFUA_3G01720	Afu3G01720	Putative uncharacterized protein [Source:UniProtKB/TrEMBL
CADAFUAG00004904	1.18045	-0.818489	1.7548	-0.46643	0.640908	0.763031	AFUA_2G17970	Afu2G17970	Festuclavine dehydrogenase [Source:UniProtKB/Swiss-Prot
CADAFUAG00000203	0.651545	-0.818489	2.32778	-0.351617	0.725125	0.825972	AFUA_3G03815	Afu3G03815	Integral membrane protein [Source:UniProtKB/TrEMBL
CADAFUAG00009869	0.524529	-0.818487	2.36796	-0.345651	0.729605	0.828841			8s_rRNA [Source:RNAMMER
CADAFUAG00009822	0.26502	-0.818485	3.81693	-0.214435	0.830208	0.899696	AFUA_1G14074	Afu1G14074
CADAFUAG00009753	0.110998	-0.818482	3.81693	-0.214435	0.830208	0.899696	AFUA_2G01865	Afu2G01865
CADAFUAG00009817	0.117713	-0.818482	3.81693	-0.214435	0.830208	0.899696	AFUA_1G14082	Afu1G14082
CADAFUAG00002450	0.171697	-0.818479	3.81693	-0.214434	0.830209	0.899696	AFUA_4G00140	Afu4G00140	RTA1 domain protein; putative [Source:UniProtKB/TrEMBL
CADAFUAG00009696	0.172997	-0.818479	3.81693	-0.214434	0.830209	0.899696	AFUA_3G02795	Afu3G02795
CADAFUAG00009756	0.172997	-0.818479	3.81693	-0.214434	0.830209	0.899696	AFUA_2G00655	Afu2G00655
CADAFUAG00009786	0.216302	-0.818479	3.81693	-0.214434	0.830209	0.899696	AFUA_5G10525	Afu5G10525
CADAFUAG00009757	0.25048	-0.818475	3.81693	-0.214433	0.83021	0.899696	AFUA_2G03518	Afu2G03518
CADAFUAG00009707	0.0581523	-0.818475	3.81693	-0.214433	0.83021	0.899696	AFUA_6G03945	Afu6G03945
CADAFUAG00000179	0.118852	-0.818472	3.81693	-0.214432	0.83021	0.899696	AFUA_3G02860	Afu3G02860	Putative uncharacterized protein [Source:UniProtKB/TrEMBL
CADAFUAG00000270	0.118852	-0.818472	3.81693	-0.214432	0.83021	0.899696	AFUA_3G02180	Afu3G02180	AM-toxin synthetase [Source:UniProtKB/TrEMBL
CADAFUAG00009758	0.118852	-0.818472	3.81693	-0.214432	0.83021	0.899696	AFUA_2G03516	Afu2G03516
CADAFUAG00009815	0.15933	-0.818472	3.81693	-0.214432	0.83021	0.899696	AFUA_1G08822	Afu1G08822
CADAFUAG00005356	583.375	-0.818469	0.187308	-4.36964	1.2445e-05	8.15847e-05	AFUA_3G12900	Afu3G12900	MFS transporter; putative [Source:UniProtKB/TrEMBL
CADAFUAG00000927	10.2285	-0.818157	0.48026	-1.70357	0.088461	0.175049	AFUA_8G00250	Afu8G00250	Dimethylallyl tryptophan synthase; putative [Source:UniProtKB/TrEMBL
CADAFUAG00002506	38.8011	-0.818016	0.374437	-2.18465	0.0289142	0.0709859	AFUA_4G00710	Afu4G00710	C6 transcription factor; putative [Source:UniProtKB/TrEMBL
CADAFUAG00000618	274.934	-0.816077	0.264419	-3.0863	0.00202663	0.00743786	AFUA_6G02000	Afu6G02000	NCS1 allantoate transporter [Source:UniProtKB/TrEMBL
CADAFUAG00005462	901.856	-0.814839	0.122706	-6.64056	3.12487e-11	4.84529e-10	AFUA_3G12400	Afu3G12400	G protein complex alpha subunit GanA [Source:UniProtKB/TrEMBL
CADAFUAG00000535	245.109	-0.81447	0.16982	-4.79609	1.61795e-06	1.26343e-05	AFUA_6G05250	Afu6G05250	Putative uncharacterized protein [Source:UniProtKB/TrEMBL
CADAFUAG00003977	1026.37	-0.814275	0.387764	-2.09992	0.0357355	0.0841416	AFUA_2G13300	Afu2G13300	Putative uncharacterized protein [Source:UniProtKB/TrEMBL
CADAFUAG00007867	47.965	-0.813732	0.307276	-2.64822	0.00809179	0.0243555	AFUA_4G12260	Afu4G12260	MFS transporter (Mch2); putative [Source:UniProtKB/TrEMBL
CADAFUAG00004166	42.3101	-0.813522	0.292484	-2.78143	0.00541201	0.0172978	AFUA_2G15400	Afu2G15400	Putative uncharacterized protein [Source:UniProtKB/TrEMBL
CADAFUAG00007168	329.622	-0.813011	0.178553	-4.55334	5.28015e-06	3.73879e-05	AFUA_1G15000	Afu1G15000	2-isopropylmalate synthase [Source:UniProtKB/TrEMBL
CADAFUAG00005778	263.269	-0.81233	0.251202	-3.23377	0.00122168	0.00477376	AFUA_3G13220	Afu3G13220	Putative uncharacterized protein [Source:UniProtKB/TrEMBL
CADAFUAG00003841	481.21	-0.812206	0.150551	-5.39489	6.85639e-08	6.7673e-07	AFUA_2G03410	Afu2G03410	Putative uncharacterized protein [Source:UniProtKB/TrEMBL
CADAFUAG00005460	118.9	-0.811972	0.16882	-4.80968	1.51173e-06	1.19005e-05	AFUA_3G12360	Afu3G12360	Putative uncharacterized protein [Source:UniProtKB/TrEMBL
CADAFUAG00005209	34.1168	-0.811356	0.409007	-1.98372	0.0472865	0.105489	AFUA_3G06400	Afu3G06400	Putative uncharacterized protein [Source:UniProtKB/TrEMBL
CADAFUAG00001142	3.65869	-0.810156	0.795948	-1.01785	0.308749	0.458618	AFUA_7G00990	Afu7G00990	Protein alcS [Source:UniProtKB/Swiss-Prot
CADAFUAG00009359	1453.14	-0.809232	0.254166	-3.18387	0.00145323	0.00555575	AFUA_7G06600	Afu7G06600	NADPH-dependent FMN reductase Lot6; putative [Source:UniProtKB/TrEMBL
CADAFUAG00006220	1136.51	-0.808843	0.125285	-6.45601	1.075e-10	1.55523e-09	AFUA_5G09750	Afu5G09750	Nucleoside transporter; putative [Source:UniProtKB/TrEMBL
CADAFUAG00004319	5.58888	-0.807863	0.697242	-1.15866	0.246597	0.385782	AFUA_2G17250	Afu2G17250	Esterase; putative [Source:UniProtKB/TrEMBL
CADAFUAG00001044	10.6978	-0.807586	0.455214	-1.77408	0.0760497	0.154612	AFUA_7G01070	Afu7G01070	Endo-1;4-beta-mannosidase [Source:UniProtKB/TrEMBL
CADAFUAG00005626	186.353	-0.807477	0.329213	-2.45275	0.0141769	0.0391334	AFUA_3G08440	Afu3G08440	Putative uncharacterized protein [Source:UniProtKB/TrEMBL
CADAFUAG00000583	382.34	-0.80624	0.199845	-4.03433	5.47577e-05	0.000311683	AFUA_6G02340	Afu6G02340	Putative uncharacterized protein [Source:UniProtKB/TrEMBL
CADAFUAG00008700	8.12464	-0.80552	0.564283	-1.42751	0.153433	0.269889	AFUA_1G01420	Afu1G01420	F-box domain protein [Source:UniProtKB/TrEMBL
CADAFUAG00002812	627.293	-0.805475	0.169806	-4.7435	2.10053e-06	1.60545e-05	AFUA_5G03770	Afu5G03770	Lipase; putative [Source:UniProtKB/TrEMBL
CADAFUAG00004364	155.714	-0.805415	0.239464	-3.36341	0.000769858	0.00320264	AFUA_2G14850	Afu2G14850	Enoyl-CoA hydratase/isomerase family protein [Source:UniProtKB/TrEMBL
CADAFUAG00000789	0.998196	-0.805305	1.55837	-0.516761	0.605323	0.735251	AFUA_8G00110	Afu8G00110	Oxidoreductase; 2OG-Fe(II) oxygenase family; putative [Source:UniProtKB/TrEMBL
CADAFUAG00000829	95.3212	-0.805003	0.158956	-5.06433	4.09847e-07	3.5608e-06	AFUA_8G01400	Afu8G01400	Mitochondrial carrier protein (Pet8); putative [Source:UniProtKB/TrEMBL
CADAFUAG00001396	50.5245	-0.804196	0.224606	-3.58047	0.000342978	0.00159313	AFUA_4G03610	Afu4G03610	Phosphate:H+ symporter [Source:UniProtKB/TrEMBL
CADAFUAG00008110	95.4732	-0.803885	0.193715	-4.14982	3.3273e-05	0.000199926	AFUA_4G08750	Afu4G08750	Putative uncharacterized protein [Source:UniProtKB/TrEMBL
CADAFUAG00003528	651.698	-0.803576	0.211232	-3.80423	0.000142247	0.000735208	AFUA_2G02270	Afu2G02270	40S ribosomal protein S14; putative [Source:UniProtKB/TrEMBL
CADAFUAG00001487	87.559	-0.803188	0.172756	-4.64925	3.33139e-06	2.46108e-05	AFUA_4G04355	Afu4G04355	PaaI_thioesterase family protein; putative [Source:UniProtKB/TrEMBL
CADAFUAG00007167	273.953	-0.803026	0.11795	-6.80817	9.88498e-12	1.63438e-10	AFUA_1G13910	Afu1G13910	TFIIH complex helicase Rad3; putative [Source:UniProtKB/TrEMBL
CADAFUAG00000972	10.2069	-0.802548	0.493086	-1.6276	0.103609	0.199148	AFUA_8G00890	Afu8G00890	MFS glucose transporter; putative [Source:UniProtKB/TrEMBL
CADAFUAG00004833	73.144	-0.801474	0.278313	-2.87976	0.00397981	0.0133027	AFUA_2G09070	Afu2G09070	DUF221 domain protein; putative [Source:UniProtKB/TrEMBL
CADAFUAG00000549	130.186	-0.80147	0.29847	-2.68526	0.00724733	0.0221637	AFUA_6G01840	Afu6G01840	C6 transcription factor; putative [Source:UniProtKB/TrEMBL
CADAFUAG00003370	17.3716	-0.800912	0.368845	-2.1714	0.0299007	0.0728756	AFUA_2G00870	Afu2G00870	Putative uncharacterized protein [Source:UniProtKB/TrEMBL
CADAFUAG00003825	1011.8	-0.800669	0.177664	-4.50663	6.5864e-06	4.55751e-05	AFUA_2G05440	Afu2G05440	Putative uncharacterized protein [Source:UniProtKB/TrEMBL
CADAFUAG00003019	7.64334	-0.799551	0.528805	-1.512	0.130535	0.238893	AFUA_8G05510	Afu8G05510	Integral membrane protein [Source:UniProtKB/TrEMBL
CADAFUAG00002305	39.0485	-0.799354	0.233248	-3.42706	0.000610154	0.00260629	AFUA_6G08780	Afu6G08780	Proline utilization protein PrnX; putative [Source:UniProtKB/TrEMBL
CADAFUAG00005130	181.485	-0.799065	0.153454	-5.20718	1.9173e-07	1.77355e-06	AFUA_3G06210	Afu3G06210	Phosphoribosylaminoimidazole-succinocarboxamide synthase [Source:UniProtKB/TrEMBL
CADAFUAG00009255	53.5528	-0.799042	1.4195	-0.562903	0.573501	0.70855	AFUA_1G00980	Afu1G00980	FAD-dependent oxidase; putative [Source:UniProtKB/TrEMBL
CADAFUAG00009554	114.693	-0.798577	0.282333	-2.82849	0.00467681	0.0153091	AFUA_7G03660	Afu7G03660	ABC-type ATPase Hef3-like; putative [Source:UniProtKB/TrEMBL
CADAFUAG00003655	68.3935	-0.798209	0.246286	-3.24098	0.00119119	0.00467341	AFUA_2G04160	Afu2G04160	Putative uncharacterized protein [Source:UniProtKB/TrEMBL
CADAFUAG00005059	21.8738	-0.797999	0.313585	-2.54476	0.0109354	0.0312935	AFUA_3G13500	Afu3G13500	Putative uncharacterized protein [Source:UniProtKB/TrEMBL
CADAFUAG00007762	104	-0.797562	0.317195	-2.51442	0.0119227	0.0337348	AFUA_4G09370	Afu4G09370	Putative uncharacterized protein [Source:UniProtKB/TrEMBL
CADAFUAG00008579	3814.37	-0.796897	0.116554	-6.83715	8.07853e-12	1.34948e-10	AFUA_1G03730	Afu1G03730	MFS transporter; putative [Source:UniProtKB/TrEMBL
CADAFUAG00007292	975.766	-0.795759	0.188905	-4.21248	2.52581e-05	0.000155911	AFUA_1G13730	Afu1G13730	5'-3' exoribonuclease 2 [Source:UniProtKB/Swiss-Prot
CADAFUAG00002353	149.457	-0.795706	0.135713	-5.86316	4.54154e-09	5.41089e-08	AFUA_6G06330	Afu6G06330	AdoMet-dependent tRNA methyltransferase (MTase) complex subunit Trm112; putative [Source:UniProtKB/TrEMBL
CADAFUAG00000363	54.9455	-0.79566	0.267824	-2.97083	0.00296996	0.010405	AFUA_3G01750	Afu3G01750	G protein coupled receptor family protein [Source:UniProtKB/TrEMBL
CADAFUAG00001790	859.962	-0.795199	0.216757	-3.66862	0.000243863	0.00117776	AFUA_6G10120	Afu6G10120	Zinc-binding oxidoreductase ToxD; putative [Source:UniProtKB/TrEMBL
CADAFUAG00000142	148.22	-0.794946	0.215737	-3.68479	0.000228888	0.00111096	AFUA_3G03710	Afu3G03710	D-aminopeptidase; putative [Source:UniProtKB/TrEMBL
CADAFUAG00000023	1.85622	-0.794601	1.2894	-0.616255	0.537726	0.679159	AFUA_3G02930	Afu3G02930	Extracellular soluble lytic transglycosylase; putative [Source:UniProtKB/TrEMBL
CADAFUAG00001308	15776.3	-0.794318	0.174796	-4.54425	5.51325e-06	3.88651e-05	AFUA_4G03595	Afu4G03595	Putative uncharacterized protein [Source:UniProtKB/TrEMBL
CADAFUAG00008508	263.328	-0.794313	0.1924	-4.12845	3.65221e-05	0.000216685	AFUA_4G09150	Afu4G09150	ABC multidrug transporter; putative [Source:UniProtKB/TrEMBL
CADAFUAG00001566	3.96233	-0.792885	0.796713	-0.995195	0.319641	0.469698	AFUA_6G11920	Afu6G11920	MFS alpha-glucoside transporter; putative [Source:UniProtKB/TrEMBL
CADAFUAG00002100	52.0953	-0.792532	0.320106	-2.47584	0.0132923	0.0370599	AFUA_6G07050	Afu6G07050	Na+/H+ antiporter; putative [Source:UniProtKB/TrEMBL
CADAFUAG00000871	908.54	-0.792183	0.37148	-2.13251	0.0329652	0.0788991	AFUA_8G01300	Afu8G01300	Putative uncharacterized protein [Source:UniProtKB/TrEMBL
CADAFUAG00000766	25.7023	-0.79128	0.624711	-1.26663	0.205286	0.336433	AFUA_8G01630	Afu8G01630	Pyridine nucleotide-disulphide oxidoreductase family protein [Source:UniProtKB/TrEMBL
CADAFUAG00009591	18.6656	-0.791007	0.451413	-1.75229	0.0797237	0.160904	AFUA_7G04850	Afu7G04850	Aldo-keto reductase; putative [Source:UniProtKB/TrEMBL
CADAFUAG00001127	62.0046	-0.790712	0.229126	-3.451	0.000558522	0.00242517	AFUA_7G00530	Afu7G00530	NACHT and Ankyrin domain protein [Source:UniProtKB/TrEMBL
CADAFUAG00002140	17.1709	-0.790507	0.385798	-2.04902	0.0404602	0.0932224	AFUA_6G09420	Afu6G09420	Putative uncharacterized protein [Source:UniProtKB/TrEMBL
CADAFUAG00002725	9.3641	-0.790246	0.576365	-1.37109	0.170348	0.292086	AFUA_5G02630	Afu5G02630	Putative uncharacterized protein [Source:UniProtKB/TrEMBL
CADAFUAG00004332	75.8631	-0.789762	0.202333	-3.90327	9.48999e-05	0.000508329	AFUA_2G09860	Afu2G09860	Purine-cytosine permease [Source:UniProtKB/TrEMBL
CADAFUAG00007183	45.76	-0.789274	0.237473	-3.32364	0.00088851	0.00361124	AFUA_1G10990	Afu1G10990	Ribosomal RNA processing protein; putative [Source:UniProtKB/TrEMBL
CADAFUAG00009849	7212.34	-0.787932	0.22439	-3.51144	0.00044568	0.00199306			Small nucleolar RNA U3 [Source:RFAM
CADAFUAG00002753	63355.9	-0.787858	0.212562	-3.70648	0.000210161	0.00102776	AFUA_5G01650	Afu5G01650	BZIP transcription factor JlbA/IDI-4 [Source:UniProtKB/TrEMBL
CADAFUAG00002672	1653.05	-0.787789	0.118386	-6.65441	2.84439e-11	4.4387e-10	AFUA_5G03060	Afu5G03060	Putative uncharacterized protein [Source:UniProtKB/TrEMBL
CADAFUAG00005666	148.97	-0.787306	0.142161	-5.53811	3.05753e-08	3.14553e-07	AFUA_3G13070	Afu3G13070	Putative uncharacterized protein [Source:UniProtKB/TrEMBL
CADAFUAG00005200	2795.45	-0.78714	0.186553	-4.21938	2.44974e-05	0.0001516	AFUA_3G06670	Afu3G06670	Pyridoxamine phosphate oxidase; putative [Source:UniProtKB/TrEMBL
CADAFUAG00002042	174.831	-0.785856	0.183938	-4.27238	1.93393e-05	0.000122168	AFUA_6G08550	Afu6G08550	C6 transcription factor; putative [Source:UniProtKB/TrEMBL
CADAFUAG00008769	303.678	-0.78575	0.167789	-4.68295	2.82772e-06	2.11959e-05	AFUA_1G03490	Afu1G03490	Epimerase/dehydratase family protein; putative [Source:UniProtKB/TrEMBL
CADAFUAG00002384	641.949	-0.785479	0.30747	-2.55465	0.0106294	0.0305464	AFUA_4G00460	Afu4G00460	Chlorohydrolase family protein; putative [Source:UniProtKB/TrEMBL
CADAFUAG00005657	56.1457	-0.785309	0.333358	-2.35575	0.0184853	0.0489123	AFUA_3G09170	Afu3G09170	MFS transporter; putative [Source:UniProtKB/TrEMBL
CADAFUAG00007933	256.726	-0.784876	0.162039	-4.84376	1.27406e-06	1.01946e-05	AFUA_4G13560	Afu4G13560	OTU-like cysteine protease; putative [Source:UniProtKB/TrEMBL
CADAFUAG00008823	261.648	-0.784873	0.257559	-3.04735	0.00230869	0.00833459	AFUA_1G06000	Afu1G06000	Ser/Thr protein phosphatase family protein [Source:UniProtKB/TrEMBL
CADAFUAG00007897	46.7587	-0.784615	0.241292	-3.25172	0.00114708	0.00453331	AFUA_4G07630	Afu4G07630	Ribosome biogenesis protein ytm1 [Source:UniProtKB/Swiss-Prot
CADAFUAG00000296	1268.15	-0.783703	0.152624	-5.13488	2.82325e-07	2.54324e-06	AFUA_3G02000	Afu3G02000	C6 transcription factor Ctf1B-like; putative [Source:UniProtKB/TrEMBL
CADAFUAG00003094	660.207	-0.78334	0.189296	-4.13818	3.50075e-05	0.000209056	AFUA_8G03870	Afu8G03870	Putative uncharacterized protein [Source:UniProtKB/TrEMBL
CADAFUAG00008315	604.44	-0.782978	0.175466	-4.46228	8.10936e-06	5.51709e-05	AFUA_4G07510	Afu4G07510	Proteasome subunit beta type [Source:UniProtKB/TrEMBL
CADAFUAG00004443	600.966	-0.782064	0.143035	-5.46765	4.56032e-08	4.60867e-07	AFUA_2G13840	Afu2G13840	Putative uncharacterized protein [Source:UniProtKB/TrEMBL
CADAFUAG00004828	4448.19	-0.781487	0.167285	-4.67159	2.98879e-06	2.23001e-05	AFUA_2G14680	Afu2G14680	Putative uncharacterized protein [Source:UniProtKB/TrEMBL
CADAFUAG00009017	224.548	-0.781459	0.306837	-2.54682	0.0108709	0.0311393	AFUA_1G05050	Afu1G05050	Cytosine deaminase; putative [Source:UniProtKB/TrEMBL
CADAFUAG00002728	37.0642	-0.780609	0.302911	-2.57702	0.00996554	0.0290336	AFUA_5G03150	Afu5G03150	Putative uncharacterized protein [Source:UniProtKB/TrEMBL
CADAFUAG00005468	2809.57	-0.78038	0.188396	-4.14223	3.43938e-05	0.000205935	AFUA_3G07300	Afu3G07300	ABC multidrug transporter; putative [Source:UniProtKB/TrEMBL
CADAFUAG00006510	8.90974	-0.780232	0.540278	-1.44413	0.148703	0.263667	AFUA_5G10440	Afu5G10440	Putative uncharacterized protein [Source:UniProtKB/TrEMBL
CADAFUAG00003966	592.311	-0.779928	0.110548	-7.05511	1.72464e-12	3.11654e-11	AFUA_2G13980	Afu2G13980	ATP-dependent RNA helicase dbp9 [Source:UniProtKB/Swiss-Prot
CADAFUAG00004411	360.396	-0.777969	0.304898	-2.55157	0.0107238	0.0307906	AFUA_2G09240	Afu2G09240	F-box protein (Pof7); putative [Source:UniProtKB/TrEMBL
CADAFUAG00005399	144.917	-0.776959	0.14037	-5.53508	3.11084e-08	3.19699e-07	AFUA_3G13940	Afu3G13940	DUF1212 domain membrane protein Prm10; putative [Source:UniProtKB/TrEMBL
CADAFUAG00001525	40.9998	-0.776836	0.246643	-3.14964	0.00163474	0.0061553	AFUA_6G00710	Afu6G00710	MFS transporter; putative [Source:UniProtKB/TrEMBL
CADAFUAG00007040	639.398	-0.775009	0.126891	-6.1077	1.0108e-09	1.30864e-08	AFUA_1G13090	Afu1G13090	Anthranilate synthase multifunctional protein TrpC; putative [Source:UniProtKB/TrEMBL
CADAFUAG00006873	1637.68	-0.774973	0.100199	-7.7343	1.03973e-14	2.36728e-13	AFUA_1G12650	Afu1G12650	3-ketoacyl-CoA ketothiolase (Kat1); putative [Source:UniProtKB/TrEMBL
CADAFUAG00005755	110.434	-0.774764	0.190218	-4.07302	4.64068e-05	0.000267437	AFUA_3G06800	Afu3G06800	Putative uncharacterized protein [Source:UniProtKB/TrEMBL
CADAFUAG00001021	4.96102	-0.774281	0.623001	-1.24282	0.213932	0.347524	AFUA_8G01430	Afu8G01430	Oxidoreductase; zinc-binding dehydrogenase family; putative [Source:UniProtKB/TrEMBL
CADAFUAG00000315	142.59	-0.774171	0.228898	-3.38216	0.000719171	0.0030163	AFUA_3G00250	Afu3G00250	Salicylate hydroxylase; putative [Source:UniProtKB/TrEMBL
CADAFUAG00002231	123.924	-0.773852	0.262993	-2.94248	0.00325594	0.0112369	AFUA_6G14030	Afu6G14030	Acyltransferase; putative [Source:UniProtKB/TrEMBL
CADAFUAG00000219	6317.46	-0.773831	0.197783	-3.91253	9.13347e-05	0.000490854	AFUA_3G03370	Afu3G03370	Cell surface protein; putative [Source:UniProtKB/TrEMBL
CADAFUAG00000931	9.55889	-0.773562	0.637542	-1.21335	0.224996	0.361675	AFUA_8G00220	Afu8G00220	Cytochrome P450; putative [Source:UniProtKB/TrEMBL
CADAFUAG00004927	48.0125	-0.773238	0.291561	-2.65206	0.00800027	0.0241249	AFUA_3G07625	Afu3G07625	Putative uncharacterized protein [Source:UniProtKB/TrEMBL
CADAFUAG00003644	3788.24	-0.773027	0.230168	-3.35854	0.000783563	0.00324619	AFUA_2G01590	Afu2G01590	Non-classical export protein Nce102; putative [Source:UniProtKB/TrEMBL
CADAFUAG00001274	87.2514	-0.773011	0.186724	-4.13987	3.4751e-05	0.000207907	AFUA_4G04470	Afu4G04470	Putative uncharacterized protein [Source:UniProtKB/TrEMBL
CADAFUAG00003462	18.3657	-0.772954	0.36254	-2.13205	0.0330026	0.0789107	AFUA_2G03620	Afu2G03620	Oxidoreductase; short-chain dehydrogenase/reductase family [Source:UniProtKB/TrEMBL
CADAFUAG00006780	94.6868	-0.772157	0.180019	-4.28931	1.79232e-05	0.000113814	AFUA_5G06170	Afu5G06170	Putative uncharacterized protein [Source:UniProtKB/TrEMBL
CADAFUAG00001581	325.583	-0.772037	0.388189	-1.98882	0.0467212	0.104443	AFUA_6G09340	Afu6G09340	Putative uncharacterized protein [Source:UniProtKB/TrEMBL
CADAFUAG00003241	671.278	-0.771987	0.132127	-5.84276	5.13426e-09	6.05767e-08	AFUA_8G05070	Afu8G05070	Neutral amino acid permease [Source:UniProtKB/TrEMBL
CADAFUAG00000992	5.97442	-0.77154	0.829758	-0.929837	0.352455	0.503611	AFUA_8G00230	Afu8G00230	Phytanoyl-CoA dioxygenase family protein [Source:UniProtKB/TrEMBL
CADAFUAG00003855	179.939	-0.771127	0.270166	-2.85427	0.00431357	0.0142738	AFUA_2G00890	Afu2G00890	Putative uncharacterized protein [Source:UniProtKB/TrEMBL
CADAFUAG00002033	7.66327	-0.770785	0.549246	-1.40335	0.160512	0.27896	AFUA_6G11280	Afu6G11280	Putative uncharacterized protein [Source:UniProtKB/TrEMBL
CADAFUAG00004422	102.648	-0.770451	0.19334	-3.98496	6.74909e-05	0.00037537	AFUA_2G17090	Afu2G17090	Putative uncharacterized protein [Source:UniProtKB/TrEMBL
CADAFUAG00001742	6.86392	-0.769649	0.659791	-1.1665	0.243411	0.382424	AFUA_6G14610	Afu6G14610	Alfa-L-rhamnosidase; putative [Source:UniProtKB/TrEMBL
CADAFUAG00008410	40.276	-0.768694	0.272801	-2.81778	0.00483565	0.0157074	AFUA_4G12240	Afu4G12240	Nitrilase; putitive [Source:UniProtKB/TrEMBL
CADAFUAG00008106	31.2765	-0.768663	0.417498	-1.84112	0.065604	0.13725	AFUA_4G12510	Afu4G12510	Putative uncharacterized protein [Source:UniProtKB/TrEMBL
CADAFUAG00005961	22.2165	-0.768586	0.301289	-2.55099	0.0107417	0.030833	AFUA_5G14640	Afu5G14640	Haloacid dehalogenase; type II [Source:UniProtKB/TrEMBL
CADAFUAG00004399	1596.84	-0.768355	0.33544	-2.29059	0.021987	0.0563411	AFUA_2G11300	Afu2G11300	Methylenetetrahydrofolate reductase [Source:UniProtKB/TrEMBL
CADAFUAG00005644	277.697	-0.767805	0.284165	-2.70197	0.00689307	0.0212609	AFUA_3G07410	Afu3G07410	Isoamyl alcohol oxidase [Source:UniProtKB/TrEMBL
CADAFUAG00002134	89.14	-0.767779	0.268707	-2.85731	0.00427253	0.0141573	AFUA_6G07790	Afu6G07790	Putative uncharacterized protein [Source:UniProtKB/TrEMBL
CADAFUAG00004768	256.745	-0.766315	0.129733	-5.90688	3.48656e-09	4.22956e-08	AFUA_2G11240	Afu2G11240	UDP-N-acetyl-glucosamine-1-P transferase Alg7; putative [Source:UniProtKB/TrEMBL
CADAFUAG00004773	1071.02	-0.765642	0.189136	-4.0481	5.16352e-05	0.000295292	AFUA_2G11100	Afu2G11100	AMFR protein; putative [Source:UniProtKB/TrEMBL
CADAFUAG00005068	2616.05	-0.765628	0.211455	-3.62076	0.000293734	0.00138693	AFUA_3G10760	Afu3G10760	Phosphoketolase; putative [Source:UniProtKB/TrEMBL
CADAFUAG00007521	27.0711	-0.765562	0.283269	-2.7026	0.00687999	0.0212408	AFUA_1G14980	Afu1G14980	Putative uncharacterized protein [Source:UniProtKB/TrEMBL
CADAFUAG00004537	191.587	-0.765524	0.158661	-4.82491	1.40069e-06	1.10982e-05	AFUA_2G07570	Afu2G07570	Glutamate 5-kinase; putative [Source:UniProtKB/TrEMBL
CADAFUAG00005330	2176.91	-0.764515	0.219917	-3.47637	0.000508248	0.00222877	AFUA_3G14560	Afu3G14560	MFS multidrug transporter; putative [Source:UniProtKB/TrEMBL
CADAFUAG00008636	94.7381	-0.7631	0.16474	-4.63215	3.61888e-06	2.6553e-05	AFUA_1G06840	Afu1G06840	Vacuolar membrane PQ loop repeat protein [Source:UniProtKB/TrEMBL
CADAFUAG00002083	104.586	-0.762992	0.205692	-3.70939	0.000207761	0.00101807	AFUA_6G10520	Afu6G10520	3-oxoacyl-acyl carrier protein reductase [Source:UniProtKB/TrEMBL
CADAFUAG00007450	190.262	-0.762723	0.243477	-3.13263	0.00173247	0.0064632	AFUA_1G17390	Afu1G17390	Putative uncharacterized protein [Source:UniProtKB/TrEMBL
CADAFUAG00001254	92.5369	-0.762277	0.373944	-2.03848	0.0415023	0.0951056	AFUA_7G01030	Afu7G01030	Calcium transporting ATPase (Pmc1); putative [Source:UniProtKB/TrEMBL
CADAFUAG00000235	18.3193	-0.761267	0.509774	-1.49334	0.135348	0.245448	AFUA_3G02260	Afu3G02260	Putative uncharacterized protein [Source:UniProtKB/TrEMBL
CADAFUAG00002919	3.40877	-0.757557	0.82461	-0.918686	0.35826	0.509309	AFUA_5G00480	Afu5G00480	Exoinulinase InuD [Source:UniProtKB/TrEMBL
CADAFUAG00001848	0.794592	-0.757427	2.31952	-0.326544	0.744013	0.839616	AFUA_6G12110	Afu6G12110	Salicylate synthetase; putative [Source:UniProtKB/TrEMBL
CADAFUAG00000541	18.2861	-0.756478	0.404602	-1.86968	0.0615278	0.130314	AFUA_6G04450	Afu6G04450	Alpha-1;2-mannosyltransferase (Mnn2); putative [Source:UniProtKB/TrEMBL
CADAFUAG00006231	10.1054	-0.755491	0.466242	-1.62038	0.10515	0.201242	AFUA_5G14540	Afu5G14540	MFS monosaccharide transporter; putative [Source:UniProtKB/TrEMBL
CADAFUAG00000628	64.201	-0.754897	0.222588	-3.39146	0.000695217	0.00292484	AFUA_6G02050	Afu6G02050	Putative uncharacterized protein [Source:UniProtKB/TrEMBL
CADAFUAG00001778	51.4518	-0.753888	0.240201	-3.13857	0.00169774	0.00635558	AFUA_6G11540	Afu6G11540	Putative uncharacterized protein [Source:UniProtKB/TrEMBL
CADAFUAG00007294	176.814	-0.753224	0.137822	-5.46519	4.62422e-08	4.66839e-07	AFUA_1G12590	Afu1G12590	RNA-binding La domain protein [Source:UniProtKB/TrEMBL
CADAFUAG00003130	8.0751	-0.752489	0.550668	-1.3665	0.171782	0.294026	AFUA_8G07150	Afu8G07150	Arsenic resistance protein ArsH; putative [Source:UniProtKB/TrEMBL
CADAFUAG00002570	1668.59	-0.752309	0.109939	-6.84296	7.75759e-12	1.29809e-10	AFUA_5G01662	Afu5G01662	Pathway-specific regulatory protein [Source:UniProtKB/TrEMBL
CADAFUAG00008044	149.559	-0.751469	0.156516	-4.80124	1.57683e-06	1.23529e-05	AFUA_4G11970	Afu4G11970	Metallothionein-I gene transcription activator [Source:UniProtKB/TrEMBL
CADAFUAG00008800	11.6179	-0.751087	0.506216	-1.48373	0.137881	0.248836	AFUA_1G07330	Afu1G07330	Dihydroxy-acid dehydratase; putative [Source:UniProtKB/TrEMBL
CADAFUAG00000077	21.4191	-0.750958	0.356083	-2.10894	0.0349498	0.0826317	AFUA_3G00770	Afu3G00770	Putative uncharacterized protein [Source:UniProtKB/TrEMBL
CADAFUAG00004753	68.0956	-0.749934	0.260283	-2.88122	0.00396135	0.0132618	AFUA_2G16980	Afu2G16980	Putative uncharacterized protein [Source:UniProtKB/TrEMBL
CADAFUAG00006294	2349.62	-0.749724	0.161349	-4.64658	3.37479e-06	2.48936e-05	AFUA_5G09190	Afu5G09190	ABC bile acid transporter; putative [Source:UniProtKB/TrEMBL
CADAFUAG00006174	483.462	-0.749506	0.149508	-5.01314	5.35491e-07	4.57875e-06	AFUA_5G08120	Afu5G08120	Arginine biosynthesis bifunctional protein ArgJ; mitochondrial Glutamate N-acetyltransferase Amino-acid acetyltransferase Arginine biosynthesis bifunctional protein ArgJ alpha chain Arginine biosynthesis bifunctional protein ArgJ beta chain [Source:UniProtKB/Swiss-Prot
CADAFUAG00007927	2.16404	-0.749449	1.04942	-0.714152	0.475133	0.622791	AFUA_4G14790	Afu4G14790	Cytochrome P450 monooxygenase; putative [Source:UniProtKB/TrEMBL
CADAFUAG00008553	408.137	-0.749324	0.131502	-5.69818	1.21092e-08	1.32873e-07	AFUA_4G06490	Afu4G06490	DNA mismatch repair protein (Mlh3); putative [Source:UniProtKB/TrEMBL
CADAFUAG00006181	8.01342	-0.748407	0.761626	-0.982643	0.325783	0.47628	AFUA_5G14170	Afu5G14170	Putative uncharacterized protein [Source:UniProtKB/TrEMBL
CADAFUAG00003298	59.6073	-0.748157	0.212163	-3.52633	0.000421364	0.00189653	AFUA_2G03740	Afu2G03740	Exosome complex endonuclease 1/ribosomal RNA processing protein; putative [Source:UniProtKB/TrEMBL
CADAFUAG00008834	406.867	-0.747771	0.22265	-3.3585	0.000783666	0.00324619	AFUA_1G02200	Afu1G02200	F-box domain protein [Source:UniProtKB/TrEMBL
CADAFUAG00006696	408.989	-0.747131	0.136877	-5.45842	4.8038e-08	4.84466e-07	AFUA_5G11080	Afu5G11080	MFS multidrug transporter; putative [Source:UniProtKB/TrEMBL
CADAFUAG00005697	115.932	-0.746986	0.24109	-3.09836	0.00194592	0.00717144	AFUA_3G08040	Afu3G08040	Polymerase (RNA) II (DNA directed) polypeptide D [Source:UniProtKB/TrEMBL
CADAFUAG00007435	1074.45	-0.746967	0.217581	-3.43305	0.000596839	0.00256293	AFUA_1G10410	Afu1G10410	DNA repair protein RAD51; putative [Source:UniProtKB/TrEMBL
CADAFUAG00008864	315.815	-0.746959	0.270357	-2.76286	0.00572976	0.0181685	AFUA_1G05460	Afu1G05460	Putative uncharacterized protein [Source:UniProtKB/TrEMBL
CADAFUAG00009108	13011.4	-0.745478	0.277476	-2.68664	0.00721743	0.0220862	AFUA_1G06580	Afu1G06580	High expression lethality protein Hel10; putative [Source:UniProtKB/TrEMBL
CADAFUAG00005247	294.964	-0.745115	0.149086	-4.99788	5.79653e-07	4.90887e-06	AFUA_3G11210	Afu3G11210	YagE family protein [Source:UniProtKB/TrEMBL
CADAFUAG00008944	168.532	-0.744899	0.205045	-3.63286	0.000280296	0.00133058	AFUA_1G04380	Afu1G04380	F-box domain protein [Source:UniProtKB/TrEMBL
CADAFUAG00003111	299.211	-0.744697	1.3771	-0.540772	0.588665	0.72121	AFUA_8G06140	Afu8G06140	Sensor histidine kinase/response regulator; putative [Source:UniProtKB/TrEMBL
CADAFUAG00000231	10.3356	-0.74453	0.521345	-1.4281	0.153264	0.26969	AFUA_3G01780	Afu3G01780	Alcohol dehydrogenase; putative [Source:UniProtKB/TrEMBL
CADAFUAG00003832	28.2814	-0.744316	0.340334	-2.18702	0.0287412	0.0706682	AFUA_2G05180	Afu2G05180	NF-X1 finger and helicase domain protein; putative [Source:UniProtKB/TrEMBL
CADAFUAG00003008	1617.6	-0.744042	0.170361	-4.36743	1.25715e-05	8.23032e-05	AFUA_8G04800	Afu8G04800	Valyl-tRNA synthetase [Source:UniProtKB/TrEMBL
CADAFUAG00006425	34.4247	-0.742862	0.243042	-3.05652	0.00223926	0.00811709	AFUA_5G09690	Afu5G09690	Putative uncharacterized protein [Source:UniProtKB/TrEMBL
CADAFUAG00008361	195.763	-0.742155	0.215444	-3.44478	0.000571532	0.00247519	AFUA_4G05870	Afu4G05870	Oxidoreductase; short-chain dehydrogenase/reductase family [Source:UniProtKB/TrEMBL
CADAFUAG00003289	3691.5	-0.741661	0.155309	-4.77539	1.79356e-06	1.38719e-05	AFUA_8G04080	Afu8G04080	Betaine aldehyde dehydrogenase (BadH); putative [Source:UniProtKB/TrEMBL
CADAFUAG00002420	3939.46	-0.740783	0.201753	-3.67173	0.000240915	0.00116584	AFUA_4G00590	Afu4G00590	Monooxygenase; putative [Source:UniProtKB/TrEMBL
CADAFUAG00003291	52.9337	-0.740329	0.401072	-1.84588	0.0649099	0.136173	AFUA_2G05170	Afu2G05170	Putative uncharacterized protein [Source:UniProtKB/TrEMBL
CADAFUAG00008223	22.4495	-0.739974	0.333096	-2.22151	0.0263167	0.0656112	AFUA_4G07960	Afu4G07960	Putative uncharacterized protein [Source:UniProtKB/TrEMBL
CADAFUAG00004923	24920.1	-0.739838	0.178903	-4.13542	3.54303e-05	0.000211451	AFUA_3G12740	Afu3G12740	Copper resistance-associated P-type ATPase; putative [Source:UniProtKB/TrEMBL
CADAFUAG00007891	11109.5	-0.739214	0.269181	-2.74616	0.00602973	0.0189528	AFUA_4G11280	Afu4G11280	GPI mannosyltransferase 2 [Source:UniProtKB/Swiss-Prot
CADAFUAG00006744	501.795	-0.739081	0.115305	-6.40976	1.45747e-10	2.06252e-09	AFUA_5G09670	Afu5G09670	RNase III domain protein [Source:UniProtKB/TrEMBL
CADAFUAG00004848	893.184	-0.738979	0.229986	-3.21315	0.00131289	0.00508929	AFUA_2G14250	Afu2G14250	CBF/NF-Y family transcription factor; putative [Source:UniProtKB/TrEMBL
CADAFUAG00009859	810776	-0.737805	0.885958	-0.832776	0.404971	0.557307			18s_rRNA [Source:RNAMMER
CADAFUAG00008960	11.7752	-0.737073	0.468204	-1.57426	0.115428	0.216222	AFUA_1G06560	Afu1G06560	Alpha-glucosidase; putative [Source:UniProtKB/TrEMBL
CADAFUAG00003256	32.3925	-0.736362	0.469267	-1.56918	0.116607	0.217884	AFUA_8G06840	Afu8G06840	Oxidoreductase; short chain dehydrogenase/reductase family [Source:UniProtKB/TrEMBL
CADAFUAG00004161	1867.67	-0.73574	0.169173	-4.34903	1.36739e-05	8.8981e-05	AFUA_2G09250	Afu2G09250	Mitochondrial carrier protein; putative [Source:UniProtKB/TrEMBL
CADAFUAG00000158	21.7209	-0.734293	0.379806	-1.93334	0.0531944	0.115876	AFUA_3G01640	Afu3G01640	C6 finger domain protein; putative [Source:UniProtKB/TrEMBL
CADAFUAG00006385	386.439	-0.733921	0.107407	-6.83307	8.31183e-12	1.38606e-10	AFUA_5G12820	Afu5G12820	Mitochondrial inner membrane protease subunit 1; putative [Source:UniProtKB/TrEMBL
CADAFUAG00003467	1076.06	-0.73365	0.244461	-3.00109	0.00269011	0.00954498	AFUA_2G00590	Afu2G00590	Glutathione S-transferase; putative [Source:UniProtKB/TrEMBL
CADAFUAG00006608	151.043	-0.733613	0.156918	-4.67514	2.93759e-06	2.19349e-05	AFUA_5G10460	Afu5G10460	Putative uncharacterized protein [Source:UniProtKB/TrEMBL
CADAFUAG00000291	7.54122	-0.733468	0.521295	-1.40701	0.159425	0.277814	AFUA_3G02030	Afu3G02030
CADAFUAG00009357	484.328	-0.731922	0.152665	-4.7943	1.63244e-06	1.2727e-05	AFUA_7G04070	Afu7G04070	Phospho-2-dehydro-3-deoxyheptonate aldolase [Source:UniProtKB/TrEMBL
CADAFUAG00008134	6.39083	-0.73169	0.624632	-1.17139	0.241441	0.380066	AFUA_4G13970	Afu4G13970	Putative uncharacterized protein [Source:UniProtKB/TrEMBL
CADAFUAG00001362	211.96	-0.731647	0.368562	-1.98514	0.0471292	0.105186	AFUA_4G02850	Afu4G02850	Putative uncharacterized protein [Source:UniProtKB/TrEMBL
CADAFUAG00007676	7.48566	-0.731151	0.68645	-1.06512	0.286822	0.433774	AFUA_1G17670	Afu1G17670	Salicylate hydroxylase; putative [Source:UniProtKB/TrEMBL
CADAFUAG00005531	466.364	-0.731057	0.303147	-2.41156	0.0158844	0.0429864	AFUA_3G06820	Afu3G06820	Oxidoreductase; FAD-binding [Source:UniProtKB/TrEMBL
CADAFUAG00007059	559.703	-0.730809	0.156173	-4.67949	2.87595e-06	2.1523e-05	AFUA_1G12065	Afu1G12065	37S ribosomal protein Mrp17 [Source:UniProtKB/TrEMBL
CADAFUAG00007519	1762.97	-0.73052	0.0947934	-7.70644	1.29372e-14	2.90473e-13	AFUA_1G10360	Afu1G10360	Mitochondrial outer membrane protein iml2 [Source:UniProtKB/Swiss-Prot
CADAFUAG00001244	71.2834	-0.730441	0.250445	-2.91657	0.00353901	0.012026	AFUA_7G00960	Afu7G00960	Extracellular cysteine-rich protein; putative [Source:UniProtKB/TrEMBL
CADAFUAG00007207	24.5139	-0.730421	0.36598	-1.99579	0.0459566	0.102971	AFUA_1G16640	Afu1G16640	Putative uncharacterized protein [Source:UniProtKB/TrEMBL
CADAFUAG00007630	742.174	-0.729784	0.133175	-5.4799	4.2557e-08	4.31878e-07	AFUA_1G13710	Afu1G13710	Isoleucyl-tRNA synthetase ;cytoplasmic [Source:UniProtKB/TrEMBL
CADAFUAG00000194	211.401	-0.729354	0.176187	-4.13966	3.47828e-05	0.000207969	AFUA_3G01110	Afu3G01110	GMP synthase [Source:UniProtKB/Swiss-Prot
CADAFUAG00005136	700.541	-0.727432	0.147346	-4.93691	7.93702e-07	6.5504e-06	AFUA_3G05460	Afu3G05460	60S ribosomal protein L20; putative [Source:UniProtKB/TrEMBL
CADAFUAG00007406	646.313	-0.7274	0.329796	-2.20561	0.0274116	0.0678796	AFUA_1G17270	Afu1G17270	FRE family ferric-chelate reductase; putative [Source:UniProtKB/TrEMBL
CADAFUAG00001455	18.3371	-0.726217	0.375525	-1.93387	0.0531288	0.115785	AFUA_4G03250	Afu4G03250	Putative uncharacterized protein [Source:UniProtKB/TrEMBL
CADAFUAG00005455	84.4899	-0.725967	0.238331	-3.04605	0.00231869	0.00836449	AFUA_3G06425	Afu3G06425	Putative uncharacterized protein [Source:UniProtKB/TrEMBL
CADAFUAG00007795	3.53609	-0.725828	0.819554	-0.885638	0.375813	0.526809	AFUA_4G14751	Afu4G14751	Putative uncharacterized protein [Source:UniProtKB/TrEMBL
CADAFUAG00000793	0.231116	-0.725503	3.50463	-0.207013	0.836	0.90343	AFUA_8G01200	Afu8G01200	Putative uncharacterized protein [Source:UniProtKB/TrEMBL
CADAFUAG00008631	12915.2	-0.725499	0.118165	-6.13969	8.26835e-10	1.08628e-08	AFUA_1G07220	Afu1G07220	6-phosphofructo-2-kinase 1 [Source:UniProtKB/TrEMBL
CADAFUAG00005121	31.1127	-0.725164	0.302131	-2.40017	0.0163876	0.0441489	AFUA_3G06570	Afu3G06570	Putative uncharacterized protein [Source:UniProtKB/TrEMBL
CADAFUAG00003816	49.0572	-0.72488	0.283289	-2.5588	0.0105033	0.0303096	AFUA_2G06010	Afu2G06010	Alkaline lipase; putative [Source:UniProtKB/TrEMBL
CADAFUAG00005294	556.604	-0.723582	0.0968877	-7.46826	8.12636e-14	1.71376e-12	AFUA_3G11710	Afu3G11710	Saccharopine dehydrogenase [Source:UniProtKB/TrEMBL
CADAFUAG00000050	3.17049	-0.723412	0.899994	-0.803797	0.421514	0.572581	AFUA_3G03880	Afu3G03880	Spherulin; putative [Source:UniProtKB/TrEMBL
CADAFUAG00004383	622.361	-0.723339	0.0971623	-7.44465	9.72017e-14	2.03225e-12	AFUA_2G15915	Afu2G15915	Glycosyltransferase family protein [Source:UniProtKB/TrEMBL
CADAFUAG00003182	58.3854	-0.722793	0.235302	-3.07177	0.00212791	0.00777728	AFUA_8G04980	Afu8G04980	Putative uncharacterized protein [Source:UniProtKB/TrEMBL
CADAFUAG00005250	1.01274	-0.722338	1.81692	-0.397562	0.690953	0.801126	AFUA_3G15280	Afu3G15280	Methyltransferase; putative [Source:UniProtKB/TrEMBL
CADAFUAG00005123	636.443	-0.722087	0.129723	-5.5664	2.60057e-08	2.70983e-07	AFUA_3G13900	Afu3G13900	Glutamate-cysteine ligase Gcs1; putative [Source:UniProtKB/TrEMBL
CADAFUAG00008889	0.602541	-0.722066	2.08147	-0.346902	0.728665	0.828548	AFUA_1G00810	Afu1G00810	Allergen Asp F7-like; putative [Source:UniProtKB/TrEMBL
CADAFUAG00005821	13904.1	-0.721197	0.188435	-3.8273	0.000129555	0.000676076	AFUA_3G05350	Afu3G05350	Histone H2B [Source:UniProtKB/Swiss-Prot
CADAFUAG00006156	14.1886	-0.721038	0.39214	-1.83873	0.0659554	0.137689	AFUA_5G07200	Afu5G07200	Putative uncharacterized protein [Source:UniProtKB/TrEMBL
CADAFUAG00000572	6109.16	-0.720133	0.135261	-5.32402	1.015e-07	9.77012e-07	AFUA_6G02130	Afu6G02130	Rab geranylgeranyl transferase escort protein; putative [Source:UniProtKB/TrEMBL
CADAFUAG00001106	3.52078	-0.719872	0.752975	-0.956036	0.339054	0.490299	AFUA_7G00840	Afu7G00840	Short chain dehydrogenase/reductase; putative [Source:UniProtKB/TrEMBL
CADAFUAG00008137	530.626	-0.719194	0.135846	-5.2942	1.19536e-07	1.13823e-06	AFUA_4G13860	Afu4G13860	Extracellular salicylate hydroxylase/monooxygenase; putative [Source:UniProtKB/TrEMBL
CADAFUAG00003373	108.267	-0.718226	0.475517	-1.51041	0.130939	0.239479	AFUA_2G00240	Afu2G00240	Putative uncharacterized protein [Source:UniProtKB/TrEMBL
CADAFUAG00009627	87.9295	-0.717399	0.254004	-2.82437	0.00473744	0.0154503	AFUA_7G04350	Afu7G04350	Mandelate racemase/muconate lactonizing enzyme family protein [Source:UniProtKB/TrEMBL
CADAFUAG00008245	195.742	-0.717317	0.124931	-5.74173	9.37141e-09	1.05085e-07	AFUA_4G09330	Afu4G09330	Putative uncharacterized protein [Source:UniProtKB/TrEMBL
CADAFUAG00008578	547.661	-0.716553	0.156617	-4.57518	4.75811e-06	3.4139e-05	AFUA_1G02090	Afu1G02090	Quinone oxidoreductase; putative [Source:UniProtKB/TrEMBL
CADAFUAG00001584	43.2494	-0.716232	0.304294	-2.35375	0.0185852	0.0491127	AFUA_6G09660	Afu6G09660	Nonribosomal peptide synthetase 10 [Source:UniProtKB/Swiss-Prot
CADAFUAG00001312	3.0865	-0.716023	0.975115	-0.734296	0.462768	0.61095
CADAFUAG00003872	377.965	-0.715583	0.179274	-3.99157	6.56375e-05	0.000366873	AFUA_2G01070	Afu2G01070	Glycosylphosphatidylinositol anchor biosynthesis protein 11 [Source:UniProtKB/Swiss-Prot
CADAFUAG00007814	1194.29	-0.714716	0.285014	-2.50765	0.0121537	0.0342686	AFUA_4G09550	Afu4G09550	Putative uncharacterized protein [Source:UniProtKB/TrEMBL
CADAFUAG00009049	9.82693	-0.714627	0.625339	-1.14278	0.253128	0.393998	AFUA_1G01270	Afu1G01270	Cytochrome P450 monooxygenase; putative [Source:UniProtKB/TrEMBL
CADAFUAG00008189	19670.2	-0.71435	0.150709	-4.73991	2.13808e-06	1.63287e-05	AFUA_4G09040	Afu4G09040	High affinity methionine permease [Source:UniProtKB/TrEMBL
CADAFUAG00003460	0.449064	-0.713856	2.18866	-0.326161	0.744302	0.839731	AFUA_2G02330	Afu2G02330	Putative uncharacterized protein [Source:UniProtKB/TrEMBL
CADAFUAG00007064	1.80258	-0.713476	1.24265	-0.574157	0.565862	0.702056	AFUA_1G11030	Afu1G11030	Xylitol dehydrogenase [Source:UniProtKB/TrEMBL
CADAFUAG00007226	2099.41	-0.71315	0.142354	-5.00969	5.45172e-07	4.64926e-06	AFUA_1G12800	Afu1G12800	Isocitrate dehydrogenase; NAD-dependent [Source:UniProtKB/TrEMBL
CADAFUAG00001567	223.495	-0.712734	0.237419	-3.00201	0.00268201	0.00951971	AFUA_6G14442	Afu6G14442	MFS monosaccharide transporter; putative [Source:UniProtKB/TrEMBL
CADAFUAG00005727	309.552	-0.71245	0.111884	-6.36775	1.91817e-10	2.67553e-09	AFUA_3G06950	Afu3G06950	Mitochondrial carrier protein (Rim2); putative [Source:UniProtKB/TrEMBL
CADAFUAG00002108	243.669	-0.712383	0.127556	-5.58487	2.33877e-08	2.45811e-07	AFUA_6G07360	Afu6G07360	40S ribosomal protein S8 [Source:UniProtKB/TrEMBL
CADAFUAG00006599	16.2463	-0.712179	0.409348	-1.73979	0.0818962	0.164469	AFUA_5G09130	Afu5G09130	Polysaccharide deacetylase family protein [Source:UniProtKB/TrEMBL
CADAFUAG00004558	415.329	-0.711103	0.180673	-3.93585	8.29032e-05	0.000450271	AFUA_2G17100	Afu2G17100	Putative uncharacterized protein [Source:UniProtKB/TrEMBL
CADAFUAG00008991	42.7518	-0.708788	0.312756	-2.26627	0.023435	0.0594715	AFUA_1G01890	Afu1G01890	Enoyl-CoA hydratase/isomerase family protein [Source:UniProtKB/TrEMBL
CADAFUAG00001366	62.7168	-0.708308	0.328783	-2.15433	0.0312139	0.0754317	AFUA_4G03290	Afu4G03290	Oxidoreductase; short-chain dehydrogenase/reductase family [Source:UniProtKB/TrEMBL
CADAFUAG00008333	33.7201	-0.708138	0.24333	-2.9102	0.00361199	0.0122312	AFUA_4G09840	Afu4G09840	Kynureninase 2 [Source:UniProtKB/Swiss-Prot
CADAFUAG00004346	2405.29	-0.707546	0.150253	-4.70902	2.48905e-06	1.88011e-05	AFUA_2G09990	Afu2G09990	Putative uncharacterized protein [Source:UniProtKB/TrEMBL
CADAFUAG00002128	418.393	-0.706012	0.121821	-5.79547	6.81292e-09	7.83848e-08	AFUA_6G07210	Afu6G07210	Fe superoxide dismutase; putative [Source:UniProtKB/TrEMBL
CADAFUAG00005511	14.1958	-0.705858	0.58259	-1.21159	0.22567	0.36242	AFUA_3G14820	Afu3G14820	4-hydroxyphenylpyruvate dioxygenase; putative [Source:UniProtKB/TrEMBL
CADAFUAG00000587	489.608	-0.705308	0.154865	-4.55435	5.25468e-06	3.72347e-05	AFUA_6G02950	Afu6G02950	Aromatic ring-opening dioxygenase LigB subunit; putative [Source:UniProtKB/TrEMBL
CADAFUAG00002979	623.569	-0.705063	0.180311	-3.91026	9.2197e-05	0.000494941	AFUA_8G05130	Afu8G05130	Putative uncharacterized protein [Source:UniProtKB/TrEMBL
CADAFUAG00001076	311.362	-0.704558	0.206956	-3.40438	0.000663139	0.00280428	AFUA_7G02440	Afu7G02440	Conserved glycine-rich protein [Source:UniProtKB/TrEMBL
CADAFUAG00003026	117.319	-0.7038	0.222532	-3.16269	0.00156317	0.00593176	AFUA_8G07030	Afu8G07030	Mannan endo-1;4-beta-mannosidase F [Source:UniProtKB/Swiss-Prot
CADAFUAG00009647	726.738	-0.703778	0.19175	-3.6703	0.000242269	0.00117181	AFUA_7G04800	Afu7G04800	Putative uncharacterized protein [Source:UniProtKB/TrEMBL
CADAFUAG00008336	75.7717	-0.703713	0.17658	-3.98523	6.74141e-05	0.00037516	AFUA_4G07570	Afu4G07570	60S ribosome biogenesis protein Mak11; putative [Source:UniProtKB/TrEMBL
CADAFUAG00006671	11320.2	-0.703181	0.0866872	-8.11171	4.99132e-16	1.32222e-14	AFUA_5G07010	Afu5G07010	HPP family protein [Source:UniProtKB/TrEMBL
CADAFUAG00008629	2845.3	-0.702757	0.157308	-4.46739	7.9178e-06	5.3981e-05	AFUA_1G02330	Afu1G02330	Putative uncharacterized protein [Source:UniProtKB/TrEMBL
CADAFUAG00002816	2.53478	-0.702587	0.883552	-0.795184	0.426507	0.577385	AFUA_5G02640	Afu5G02640	O-methyltransferase; putative [Source:UniProtKB/TrEMBL
CADAFUAG00002264	705.103	-0.702491	0.0910486	-7.71556	1.20452e-14	2.71073e-13	AFUA_6G11140	Afu6G11140	MATE efflux family protein subfamily; putative [Source:UniProtKB/TrEMBL
CADAFUAG00007539	13.4127	-0.702193	0.442114	-1.58826	0.112227	0.211531	AFUA_1G15100	Afu1G15100	EBP domain protein; putative [Source:UniProtKB/TrEMBL
CADAFUAG00002124	30.1455	-0.702132	0.344005	-2.04105	0.0412456	0.0947071	AFUA_6G09210	Afu6G09210	SIR2 family histone deacetylase; putative [Source:UniProtKB/TrEMBL
CADAFUAG00002994	18.4731	-0.701203	0.328927	-2.13179	0.0330241	0.0789235	AFUA_8G07070	Afu8G07070	Maltase MalT [Source:UniProtKB/TrEMBL
CADAFUAG00002834	49.0249	-0.701201	0.251891	-2.78375	0.0053734	0.0171956	AFUA_5G01060	Afu5G01060	Putative uncharacterized protein [Source:UniProtKB/TrEMBL
CADAFUAG00002247	23.0741	-0.700803	0.323009	-2.16961	0.0300366	0.0730784	AFUA_6G07250	Afu6G07250	Putative uncharacterized protein [Source:UniProtKB/TrEMBL
CADAFUAG00002119	75.2517	-0.700508	0.216686	-3.23282	0.00122575	0.00478584	AFUA_6G09350	Afu6G09350	C6 finger domain protein; putative [Source:UniProtKB/TrEMBL
CADAFUAG00005398	1610.27	-0.699752	0.250189	-2.79689	0.00515974	0.0165938	AFUA_3G11280	Afu3G11280	Class V chitinase; putative [Source:UniProtKB/TrEMBL
CADAFUAG00000695	62.1487	-0.699659	0.262297	-2.66744	0.00764324	0.0232211	AFUA_6G04610	Afu6G04610	DNA-directed RNA polymerase I and III 14 kDa polypeptide [Source:UniProtKB/TrEMBL
CADAFUAG00002706	184.778	-0.699381	0.168144	-4.15941	3.19076e-05	0.000192197	AFUA_5G03510	Afu5G03510	PQ loop repeat protein [Source:UniProtKB/TrEMBL
CADAFUAG00008438	7.31604	-0.699074	0.553132	-1.26385	0.206285	0.337797	AFUA_4G09310	Afu4G09310	Putative uncharacterized protein [Source:UniProtKB/TrEMBL
CADAFUAG00001155	17.0599	-0.698603	0.479643	-1.45651	0.145253	0.258446	AFUA_7G02150	Afu7G02150	Streptococcal hemagglutinin protein; putative [Source:UniProtKB/TrEMBL
CADAFUAG00008272	216.171	-0.697882	0.151662	-4.60156	4.19334e-06	3.04009e-05	AFUA_4G08610	Afu4G08610	Calcium homeostasis protein Regucalcin; putative [Source:UniProtKB/TrEMBL
CADAFUAG00004091	299.072	-0.697192	0.162223	-4.29773	1.72554e-05	0.000110005	AFUA_2G08630	Afu2G08630	DUF788 domain protein [Source:UniProtKB/TrEMBL
CADAFUAG00006320	783.14	-0.696467	0.124666	-5.58666	2.31475e-08	2.43814e-07	AFUA_5G13850	Afu5G13850	Small oligopeptide transporter; OPT family [Source:UniProtKB/TrEMBL
CADAFUAG00004938	2396.64	-0.696466	0.207855	-3.35073	0.000805986	0.00332307	AFUA_3G11010	Afu3G11010	Eukaryotic translation initiation factor eIF-2C4; putative [Source:UniProtKB/TrEMBL
CADAFUAG00002245	3813.86	-0.695738	0.112758	-6.17019	6.82059e-10	9.03192e-09	AFUA_6G08050	Afu6G08050	6-phosphogluconate dehydrogenase; decarboxylating [Source:UniProtKB/TrEMBL
CADAFUAG00006766	154.073	-0.695729	0.33031	-2.10629	0.0351791	0.0830932	AFUA_5G06990	Afu5G06990	O-methyltransferase; putative [Source:UniProtKB/TrEMBL
CADAFUAG00002533	176.963	-0.695569	0.187257	-3.71451	0.000203599	0.00099969	AFUA_5G02655	Afu5G02655	Putative uncharacterized protein [Source:UniProtKB/TrEMBL
CADAFUAG00004174	1105.05	-0.695555	0.20956	-3.31911	0.000903036	0.00366415	AFUA_2G13940	Afu2G13940	Putative uncharacterized protein [Source:UniProtKB/TrEMBL
CADAFUAG00006883	222.421	-0.695276	0.253942	-2.73794	0.0061826	0.019352	AFUA_1G10480	Afu1G10480	DNA polymerase POL4; putative [Source:UniProtKB/TrEMBL
CADAFUAG00007403	448.885	-0.694861	0.178896	-3.88416	0.000102686	0.000546421	AFUA_1G12270	Afu1G12270	Putative uncharacterized protein [Source:UniProtKB/TrEMBL
CADAFUAG00000839	17.4414	-0.693887	0.326133	-2.12762	0.0333689	0.0795909	AFUA_8G01820	Afu8G01820	Putative uncharacterized protein [Source:UniProtKB/TrEMBL
CADAFUAG00003659	1690.21	-0.69376	0.194854	-3.56041	0.000370281	0.00169844	AFUA_2G04540	Afu2G04540	Putative uncharacterized protein [Source:UniProtKB/TrEMBL
CADAFUAG00000070	10.0561	-0.693487	0.524652	-1.3218	0.186233	0.312381	AFUA_3G03780	Afu3G03780	Putative uncharacterized protein [Source:UniProtKB/TrEMBL
CADAFUAG00009140	205.558	-0.693427	0.142515	-4.86564	1.14086e-06	9.21982e-06	AFUA_1G01380	Afu1G01380	Alpha-1;6-mannosyltransferase subunit (Hoc1); putative [Source:UniProtKB/TrEMBL
CADAFUAG00001219	111.949	-0.693389	0.269295	-2.57483	0.0100288	0.0292004	AFUA_7G01140	Afu7G01140	Putative uncharacterized protein [Source:UniProtKB/TrEMBL
CADAFUAG00006422	30.6028	-0.693339	0.296461	-2.33872	0.0193499	0.0507198	AFUA_5G09040	Afu5G09040	Putative uncharacterized protein [Source:UniProtKB/TrEMBL
CADAFUAG00006234	17.1772	-0.692857	0.395724	-1.75086	0.0799703	0.161268	AFUA_5G12760	Afu5G12760	CCCH zinc finger DNA binding protein [Source:UniProtKB/TrEMBL
CADAFUAG00001154	26.8188	-0.692289	0.288206	-2.40206	0.0163031	0.0439784	AFUA_7G02200	Afu7G02200	Meiotic recombination protein (Dmc1); putative [Source:UniProtKB/TrEMBL
CADAFUAG00009003	86.1186	-0.691812	0.349297	-1.98058	0.0476384	0.106006	AFUA_1G04220	Afu1G04220	Putative uncharacterized protein [Source:UniProtKB/TrEMBL
CADAFUAG00009154	86.9798	-0.690707	0.173744	-3.97543	7.02528e-05	0.000388951	AFUA_1G02610	Afu1G02610	rRNA processing protein; putative [Source:UniProtKB/TrEMBL
CADAFUAG00004025	116.983	-0.690689	0.182098	-3.79294	0.000148873	0.000764173	AFUA_2G09750	Afu2G09750	Putative uncharacterized protein [Source:UniProtKB/TrEMBL
CADAFUAG00009244	3500.47	-0.690534	0.139764	-4.9407	7.78413e-07	6.44049e-06	AFUA_1G04540	Afu1G04540	NADH-cytochrome b5 reductase 2 [Source:UniProtKB/Swiss-Prot
CADAFUAG00000818	10.9064	-0.689974	0.434643	-1.58745	0.112411	0.211794	AFUA_8G01410	Afu8G01410	Class V chitinase ChiB1 [Source:UniProtKB/TrEMBL
CADAFUAG00005178	184.251	-0.689841	0.150929	-4.57062	4.86276e-06	3.48128e-05	AFUA_3G08800	Afu3G08800	Putative uncharacterized protein [Source:UniProtKB/TrEMBL
CADAFUAG00003083	4863.3	-0.689772	0.140141	-4.92197	8.56759e-07	7.03289e-06	AFUA_8G04070	Afu8G04070	Glucosamine-6-phosphate deaminase; putative [Source:UniProtKB/TrEMBL
CADAFUAG00005417	180.606	-0.689205	0.213301	-3.23114	0.00123296	0.00480819	AFUA_3G10390	Afu3G10390	Putative uncharacterized protein [Source:UniProtKB/TrEMBL
CADAFUAG00001036	34.4133	-0.687796	0.234647	-2.93119	0.00337664	0.0115672	AFUA_7G01210	Afu7G01210	Putative uncharacterized protein [Source:UniProtKB/TrEMBL
CADAFUAG00009771	65.0763	-0.687603	0.297315	-2.31271	0.0207387	0.0538316	AFUA_3G08625	Afu3G08625
CADAFUAG00005050	39.7168	-0.686311	0.237833	-2.88569	0.0039056	0.0131068	AFUA_3G06580	Afu3G06580	Ribosomal assembly complex component Ipi3; putative [Source:UniProtKB/TrEMBL
CADAFUAG00002499	20.4975	-0.685407	0.336916	-2.03436	0.0419156	0.0958156	AFUA_4G01300	Afu4G01300	UPF0075 family protein [Source:UniProtKB/TrEMBL
CADAFUAG00001956	174.608	-0.685318	0.206744	-3.31481	0.000917063	0.00371487	AFUA_6G06710	Afu6G06710	Geranylgeranyl transferase beta subunit; putative [Source:UniProtKB/TrEMBL
CADAFUAG00009435	91.7708	-0.684477	0.29056	-2.35572	0.018487	0.0489123	AFUA_7G04280	Afu7G04280	Small nuclear ribonucleoprotein (LSM5); putative [Source:UniProtKB/TrEMBL
CADAFUAG00008064	21.694	-0.683717	0.317772	-2.15159	0.0314293	0.075839	AFUA_4G08840	Afu4G08840	RING finger protein; putative [Source:UniProtKB/TrEMBL
CADAFUAG00009741	0.562004	-0.683366	2.33341	-0.292861	0.769628	0.859208	AFUA_8G06045	Afu8G06045
CADAFUAG00004258	464.684	-0.682888	0.112582	-6.0657	1.31381e-09	1.67623e-08	AFUA_2G15500	Afu2G15500	Small nuclear ribonucleoprotein SmF; putative [Source:UniProtKB/TrEMBL
CADAFUAG00000975	37.2835	-0.682331	0.234218	-2.91322	0.00357717	0.0121302	AFUA_8G02630	Afu8G02630	Probable exopolygalacturonase B [Source:UniProtKB/Swiss-Prot
CADAFUAG00001469	519.347	-0.682177	0.161275	-4.22989	2.33809e-05	0.000145338	AFUA_4G03980	Afu4G03980	Chromosome segregation protein (Pcs1); putative [Source:UniProtKB/TrEMBL
CADAFUAG00000280	3591.81	-0.682109	0.215305	-3.16811	0.00153432	0.00583139	AFUA_3G02780	Afu3G02780	MFS multidrug transporter; putative [Source:UniProtKB/TrEMBL
CADAFUAG00001510	481.306	-0.681835	0.179351	-3.80168	0.000143719	0.000742027	AFUA_6G00370	Afu6G00370	Aminotransferase; putative [Source:UniProtKB/TrEMBL
CADAFUAG00007374	67.3137	-0.681804	0.21733	-3.13718	0.0017058	0.00637838	AFUA_1G10800	Afu1G10800	Thioesterase family protein [Source:UniProtKB/TrEMBL
CADAFUAG00002273	673.385	-0.68053	0.217166	-3.13369	0.00172623	0.00644487	AFUA_6G12590	Afu6G12590	Putative uncharacterized protein [Source:UniProtKB/TrEMBL
CADAFUAG00002101	5845.8	-0.680421	0.138244	-4.92187	8.57228e-07	7.03289e-06	AFUA_6G09100	Afu6G09100	Putative uncharacterized protein [Source:UniProtKB/TrEMBL
CADAFUAG00008217	59.9604	-0.680039	0.271351	-2.50612	0.0122064	0.0343874	AFUA_4G08450	Afu4G08450	Putative uncharacterized protein [Source:UniProtKB/TrEMBL
CADAFUAG00004296	92.728	-0.679817	0.994085	-0.683862	0.494062	0.641206	AFUA_2G08820	Afu2G08820	Putative uncharacterized protein [Source:UniProtKB/TrEMBL
CADAFUAG00005003	859.361	-0.679345	0.559056	-1.21517	0.224303	0.3608	AFUA_3G14620	Afu3G14620	Probable arabinan endo-1;5-alpha-L-arabinosidase A [Source:UniProtKB/Swiss-Prot
CADAFUAG00004777	334.701	-0.678958	0.175553	-3.86754	0.00010994	0.000581668	AFUA_2G16340	Afu2G16340	Putative uncharacterized protein [Source:UniProtKB/TrEMBL
CADAFUAG00007044	112.08	-0.678924	0.320173	-2.1205	0.0339643	0.0807535	AFUA_1G16370	Afu1G16370	Molybdenum cofactor biosynthesis protein (MoaC); putative [Source:UniProtKB/TrEMBL
CADAFUAG00008471	9.19609	-0.677479	0.502099	-1.34929	0.177243	0.301356	AFUA_4G08295	Afu4G08295	Histone h1,3,; putative [Source:UniProtKB/TrEMBL
CADAFUAG00007774	128.36	-0.677357	0.235299	-2.8787	0.00399316	0.0133316	AFUA_4G08760	Afu4G08760	Phospho-2-dehydro-3-deoxyheptonate aldolase; class II [Source:UniProtKB/TrEMBL
CADAFUAG00002037	238.931	-0.676923	0.202104	-3.34938	0.000809916	0.00333786	AFUA_6G08690	Afu6G08690	DUF455 domain protein [Source:UniProtKB/TrEMBL
CADAFUAG00003309	76.5156	-0.675636	0.202824	-3.33114	0.000864914	0.00352714	AFUA_2G02210	Afu2G02210	Putative uncharacterized protein [Source:UniProtKB/TrEMBL
CADAFUAG00002926	1.645	-0.674806	1.18402	-0.569928	0.568727	0.704368	AFUA_5G01720	Afu5G01720	Putative uncharacterized protein [Source:UniProtKB/TrEMBL
CADAFUAG00001357	652.311	-0.674797	0.134023	-5.03495	4.77971e-07	4.11589e-06	AFUA_4G04800	Afu4G04800	AAA family ATPase; putative [Source:UniProtKB/TrEMBL
CADAFUAG00001202	158.113	-0.67333	0.136287	-4.94054	7.79059e-07	6.44049e-06	AFUA_7G02030	Afu7G02030	Cytochrome c oxidase assembly protein (Pet117); putative [Source:UniProtKB/TrEMBL
CADAFUAG00000557	377.915	-0.67314	0.191697	-3.51148	0.000445618	0.00199306	AFUA_6G02930	Afu6G02930	Putative uncharacterized protein [Source:UniProtKB/TrEMBL
CADAFUAG00000616	638.693	-0.672947	0.147539	-4.56115	5.08742e-06	3.61549e-05	AFUA_6G02910	Afu6G02910	Acetylglutamate kinase; putative [Source:UniProtKB/TrEMBL
CADAFUAG00006032	1550.87	-0.672218	0.118838	-5.65659	1.54409e-08	1.67266e-07	AFUA_5G13715	Afu5G13715	Integral membrane protein PTH11-like; putative [Source:UniProtKB/TrEMBL
CADAFUAG00002413	41.7767	-0.672182	0.385721	-1.74266	0.0813923	0.163863	AFUA_4G00235	Afu4G00235	Putative uncharacterized protein [Source:UniProtKB/TrEMBL
CADAFUAG00007512	2.56902	-0.672136	0.952252	-0.705839	0.480288	0.627274	AFUA_1G17610	Afu1G17610	Putative uncharacterized protein [Source:UniProtKB/TrEMBL
CADAFUAG00002463	1008.36	-0.671583	0.286817	-2.3415	0.0192064	0.0504421	AFUA_4G00450	Afu4G00450	Putative uncharacterized protein [Source:UniProtKB/TrEMBL
CADAFUAG00006072	264.442	-0.671143	0.146914	-4.56827	4.91757e-06	3.50503e-05	AFUA_5G05890	Afu5G05890	Mitochondrial NADH kinase POS5; putative [Source:UniProtKB/TrEMBL
CADAFUAG00000480	160.498	-0.670479	0.170822	-3.92502	8.67226e-05	0.0004691	AFUA_6G05170	Afu6G05170	Mitochondrial folate carrier protein Flx1; putative [Source:UniProtKB/TrEMBL
CADAFUAG00007575	1134.89	-0.670444	0.166481	-4.02716	5.64541e-05	0.000320588	AFUA_1G15930	Afu1G15930	Choline kinase; putative [Source:UniProtKB/TrEMBL
CADAFUAG00004460	226.344	-0.670416	0.216198	-3.10094	0.00192905	0.00712548	AFUA_2G07840	Afu2G07840	Competence/damage-inducible protein CinA; putative [Source:UniProtKB/TrEMBL
CADAFUAG00005364	35.5235	-0.670276	0.253883	-2.6401	0.00828819	0.0248237	AFUA_3G10870	Afu3G10870	Putative uncharacterized protein [Source:UniProtKB/TrEMBL
CADAFUAG00000354	9.90646	-0.66947	0.459606	-1.45662	0.145222	0.258438	AFUA_3G03295	Afu3G03295	Putative uncharacterized protein [Source:UniProtKB/TrEMBL
CADAFUAG00007380	237.587	-0.669451	0.152101	-4.40136	1.07577e-05	7.13412e-05	AFUA_1G13880	Afu1G13880	snoRNP assembly factor Naf1; putative [Source:UniProtKB/TrEMBL
CADAFUAG00007702	30.858	-0.669124	0.504673	-1.32586	0.184887	0.310552	AFUA_1G17650	Afu1G17650	Short chain dehydrogenase; putative [Source:UniProtKB/TrEMBL
CADAFUAG00008755	130.255	-0.669038	0.274666	-2.43582	0.014858	0.0407358	AFUA_1G01700	Afu1G01700	Conserved serine-rich protein [Source:UniProtKB/TrEMBL
CADAFUAG00000687	3704.16	-0.667468	0.167959	-3.97399	7.06787e-05	0.000391067	AFUA_6G03810	Afu6G03810	ATP synthase D chain; mitochondrial; putative [Source:UniProtKB/TrEMBL
CADAFUAG00006334	512.768	-0.667376	0.275018	-2.42666	0.0152385	0.0415521	AFUA_5G07330	Afu5G07330	Carboxypeptidase S1; putative [Source:UniProtKB/TrEMBL
CADAFUAG00008486	249.04	-0.666436	0.140817	-4.73263	2.21629e-06	1.69127e-05	AFUA_4G06850	Afu4G06850	Coenzyme A synthetase; putative [Source:UniProtKB/TrEMBL
CADAFUAG00007443	139.969	-0.665643	0.15965	-4.16939	3.05414e-05	0.000184884	AFUA_1G16750	Afu1G16750	Mitochondrial cation transporter; putative [Source:UniProtKB/TrEMBL
CADAFUAG00007841	863.16	-0.665434	0.0948614	-7.01481	2.30261e-12	4.09456e-11	AFUA_4G08740	Afu4G08740	MFS multidrug transporter; putative [Source:UniProtKB/TrEMBL
CADAFUAG00006566	1656.77	-0.665378	0.127713	-5.20993	1.88915e-07	1.75251e-06	AFUA_5G06580	Afu5G06580	MFS multidrug transporter; putative [Source:UniProtKB/TrEMBL
CADAFUAG00005800	649.127	-0.665192	0.217889	-3.0529	0.00226645	0.00820342	AFUA_3G06597	Afu3G06597	Putative uncharacterized protein [Source:UniProtKB/TrEMBL
CADAFUAG00007035	178.648	-0.664793	0.238035	-2.79283	0.00522491	0.0167758	AFUA_1G12970	Afu1G12970	Putative uncharacterized protein [Source:UniProtKB/TrEMBL
CADAFUAG00005926	1320.55	-0.664671	0.211786	-3.1384	0.00169871	0.00635678	AFUA_5G06390	Afu5G06390	Adenosine kinase; putative [Source:UniProtKB/TrEMBL
CADAFUAG00004843	810.552	-0.664622	0.128466	-5.17352	2.29721e-07	2.10098e-06	AFUA_2G15930	Afu2G15930	Alcohol dehydrogenase; zinc-containing [Source:UniProtKB/TrEMBL
CADAFUAG00004088	1551.62	-0.663769	0.129343	-5.13185	2.86914e-07	2.58036e-06	AFUA_2G17170	Afu2G17170	Na+/H+ antiporter Nha1 [Source:UniProtKB/TrEMBL
CADAFUAG00002040	136.012	-0.663629	0.225795	-2.93908	0.00329191	0.0113416	AFUA_6G10880	Afu6G10880	Acyl-CoA dehydrogenase family protein [Source:UniProtKB/TrEMBL
CADAFUAG00001375	179.783	-0.66357	0.124873	-5.31398	1.07259e-07	1.02635e-06	AFUA_4G03645	Afu4G03645	Mitochondrial zinc maintenance protein 1; mitochondrial [Source:UniProtKB/Swiss-Prot
CADAFUAG00009850	28.7558	-0.662623	0.43847	-1.51122	0.130733	0.239177			Small nucleolar RNA snR36 [Source:RFAM
CADAFUAG00002113	5.13472	-0.662056	0.7286	-0.908669	0.363525	0.514213	AFUA_6G14590	Afu6G14590	MFS alpha-glucoside transporter; putative [Source:UniProtKB/TrEMBL
CADAFUAG00001113	70.0904	-0.661731	0.199792	-3.3121	0.000925992	0.00374324	AFUA_7G01540	Afu7G01540	Probable endo-beta-1;4-glucanase celB [Source:UniProtKB/Swiss-Prot
CADAFUAG00006342	6768.06	-0.661724	0.150502	-4.39679	1.09865e-05	7.26111e-05	AFUA_5G08090	Afu5G08090	Pyridoxine biosynthesis protein [Source:UniProtKB/TrEMBL
CADAFUAG00008893	427.321	-0.661466	0.142708	-4.63511	3.56752e-06	2.61959e-05	AFUA_1G04460	Afu1G04460	Lysine--tRNA ligase [Source:UniProtKB/TrEMBL
CADAFUAG00008839	5099.07	-0.660857	0.116903	-5.65301	1.57663e-08	1.69934e-07	AFUA_1G00480	Afu1G00480	Glucosamine-6-phosphate deaminase; putative [Source:UniProtKB/TrEMBL
CADAFUAG00006729	120.764	-0.660111	0.184302	-3.58168	0.000341398	0.00158731	AFUA_5G12360	Afu5G12360	Mitochondrial oxaloacetate transporter (Oac); putative [Source:UniProtKB/TrEMBL
CADAFUAG00006298	144.801	-0.660107	0.184487	-3.57806	0.000346155	0.00160483	AFUA_5G07950	Afu5G07950	Serine/threonine protein kinase; putative [Source:UniProtKB/TrEMBL
CADAFUAG00005975	6.6498	-0.659512	0.641125	-1.02868	0.30363	0.453023	AFUA_5G08460	Afu5G08460	SET domain protein [Source:UniProtKB/TrEMBL
CADAFUAG00009256	745.918	-0.659436	0.0926412	-7.11817	1.09366e-12	2.00614e-11	AFUA_1G07700	Afu1G07700	MFS monosaccharide transporter; putative [Source:UniProtKB/TrEMBL
CADAFUAG00005891	6.38735	-0.659156	0.679011	-0.970759	0.331668	0.482417
CADAFUAG00004832	7.11335	-0.658268	0.55699	-1.18183	0.237272	0.375572	AFUA_2G13280	Afu2G13280	Putative uncharacterized protein [Source:UniProtKB/TrEMBL
CADAFUAG00008701	471.125	-0.657173	0.199803	-3.28911	0.00100506	0.00403935	AFUA_1G07730	Afu1G07730	Extracellular metalloprotease AFUA_1G07730 [Source:UniProtKB/Swiss-Prot
CADAFUAG00008239	3.93739	-0.65571	0.712222	-0.920654	0.357231	0.508462	AFUA_4G06050	Afu4G06050	MFS multidrug transporter; putative [Source:UniProtKB/TrEMBL
CADAFUAG00005561	59.8766	-0.655196	0.232645	-2.81629	0.00485811	0.0157593	AFUA_3G12260	Afu3G12260	Putative uncharacterized protein [Source:UniProtKB/TrEMBL
CADAFUAG00005780	311.68	-0.654523	0.296044	-2.2109	0.0270426	0.0671883	AFUA_3G14030	Afu3G14030	Extracellular phytase; putative [Source:UniProtKB/TrEMBL
CADAFUAG00007524	1354.35	-0.654506	0.135541	-4.82886	1.3732e-06	1.09071e-05	AFUA_1G12180	Afu1G12180	Protein sey1 [Source:UniProtKB/Swiss-Prot
CADAFUAG00003351	444.081	-0.654207	0.187593	-3.48738	0.00048778	0.00215261	AFUA_2G00470	Afu2G00470	C6 transcription factor; putative [Source:UniProtKB/TrEMBL
CADAFUAG00004894	1327.88	-0.652728	0.115513	-5.65069	1.59808e-08	1.72055e-07	AFUA_2G11250	Afu2G11250	Aryl-alcohol dehydrogenase Aad14; putative [Source:UniProtKB/TrEMBL
CADAFUAG00001564	48.5175	-0.652002	0.277511	-2.34946	0.0188006	0.0496143	AFUA_6G12940	Afu6G12940	Metallo-beta-lactamase domain protein; putative [Source:UniProtKB/TrEMBL
CADAFUAG00009103	106.299	-0.651901	0.207937	-3.13509	0.001718	0.00641907	AFUA_1G06220	Afu1G06220	ATP-dependent rRNA helicase rrp3 [Source:UniProtKB/Swiss-Prot
CADAFUAG00000637	1.19136	-0.651681	1.56974	-0.415152	0.67803	0.792535	AFUA_6G03550	Afu6G03550	Putative uncharacterized protein [Source:UniProtKB/TrEMBL
CADAFUAG00005228	147.605	-0.650476	0.188412	-3.45242	0.000555585	0.00241457	AFUA_3G07260	Afu3G07260	Esterase/lipase; putative [Source:UniProtKB/TrEMBL
CADAFUAG00002121	21.994	-0.650399	0.347284	-1.87282	0.0610937	0.129571	AFUA_6G14400	Afu6G14400	Probable pectate lyase C [Source:UniProtKB/Swiss-Prot
CADAFUAG00000617	763.3	-0.650103	0.122967	-5.28683	1.24454e-07	1.17813e-06	AFUA_6G05020	Afu6G05020	Acetamidase [Source:UniProtKB/TrEMBL
CADAFUAG00004957	101.387	-0.649879	0.246424	-2.63724	0.00835843	0.0249649	AFUA_3G08180	Afu3G08180	Ctr copper transporter family protein [Source:UniProtKB/TrEMBL
CADAFUAG00008887	75.3737	-0.649707	0.292303	-2.22272	0.0262347	0.0654489	AFUA_1G04150	Afu1G04150	Tartrate dehydrogenase; putative [Source:UniProtKB/TrEMBL
CADAFUAG00004186	23981.1	-0.648473	0.126682	-5.11893	3.07282e-07	2.74577e-06	AFUA_2G16500	Afu2G16500	Putative uncharacterized protein [Source:UniProtKB/TrEMBL
CADAFUAG00003802	1694.89	-0.648143	0.222174	-2.91727	0.00353107	0.0120042	AFUA_2G05980	Afu2G05980	Putative uncharacterized protein [Source:UniProtKB/TrEMBL
CADAFUAG00006760	504.616	-0.647526	0.0963974	-6.71726	1.85177e-11	2.97078e-10	AFUA_5G09350	Afu5G09350	Putative uncharacterized protein [Source:UniProtKB/TrEMBL
CADAFUAG00009111	6040.69	-0.647515	0.09319	-6.94833	3.69635e-12	6.45168e-11	AFUA_1G05040	Afu1G05040	Protein mitochondrial targeting protein (Mas1); putative [Source:UniProtKB/TrEMBL
CADAFUAG00000842	40.5196	-0.646724	0.248288	-2.60474	0.00919448	0.0272195	AFUA_8G01360	Afu8G01360	Putative uncharacterized protein [Source:UniProtKB/TrEMBL
CADAFUAG00000255	48.9609	-0.646627	0.362078	-1.78588	0.0741194	0.151401	AFUA_3G03310	Afu3G03310	RTA1 domain protein [Source:UniProtKB/TrEMBL
CADAFUAG00005739	143.266	-0.645409	0.206223	-3.12966	0.00175007	0.00651886	AFUA_3G08130	Afu3G08130	Putative uncharacterized protein [Source:UniProtKB/TrEMBL
CADAFUAG00000084	10.9733	-0.645125	0.479403	-1.34569	0.178404	0.302643	AFUA_3G01120	Afu3G01120	MFS multidrug transporter; putative [Source:UniProtKB/TrEMBL
CADAFUAG00003087	174.445	-0.64387	0.162661	-3.95834	7.54715e-05	0.000413837	AFUA_8G05020	Afu8G05020	Beta-hexosaminidase [Source:UniProtKB/TrEMBL
CADAFUAG00004387	5336.29	-0.643674	0.155883	-4.12923	3.63987e-05	0.000216281	AFUA_2G13310	Afu2G13310	RING finger domain protein; putative [Source:UniProtKB/TrEMBL
CADAFUAG00005237	62.102	-0.642656	0.204375	-3.1445	0.00166373	0.00624991	AFUA_3G13020	Afu3G13020	Putative uncharacterized protein [Source:UniProtKB/TrEMBL
CADAFUAG00004934	141.497	-0.642631	0.336931	-1.90731	0.0564809	0.121323	AFUA_3G08550	Afu3G08550	Short-chain dehydrogenase/reductase family protein; putative [Source:UniProtKB/TrEMBL
CADAFUAG00000058	2.55082	-0.642507	1.03257	-0.622238	0.533786	0.675265	AFUA_3G03220	Afu3G03220	Putative uncharacterized protein [Source:UniProtKB/TrEMBL
CADAFUAG00000813	128.81	-0.642431	0.170752	-3.76237	0.000168308	0.000850906	AFUA_8G00700	Afu8G00700	Class III chitinase ChiA2 [Source:UniProtKB/TrEMBL
CADAFUAG00009169	173.988	-0.641796	0.294945	-2.17599	0.0295563	0.0722158	AFUA_1G01430	Afu1G01430	AMP-binding enzyme; putative [Source:UniProtKB/TrEMBL
CADAFUAG00004947	853.374	-0.641604	0.151545	-4.23376	2.2982e-05	0.000143133	AFUA_3G14610	Afu3G14610	Cytochrome P450 monooxygenase; putative [Source:UniProtKB/TrEMBL
CADAFUAG00002320	45.904	-0.641511	0.242428	-2.64619	0.00814042	0.0244489	AFUA_6G11480	Afu6G11480	Phenol 2-monooxygenase; putative [Source:UniProtKB/TrEMBL
CADAFUAG00006847	39.2685	-0.64139	0.260346	-2.46361	0.0137547	0.0381522	AFUA_1G17060	Afu1G17060	HLH DNA binding domain protein; putative [Source:UniProtKB/TrEMBL
CADAFUAG00002075	21.0272	-0.640169	0.419385	-1.52645	0.126899	0.233596	AFUA_6G12010	Afu6G12010	Glycosyl hydrolase family protein [Source:UniProtKB/TrEMBL
CADAFUAG00001458	54.2979	-0.639584	0.219345	-2.91588	0.00354686	0.0120442	AFUA_4G03040	Afu4G03040	Got1 family protein [Source:UniProtKB/TrEMBL
CADAFUAG00000183	105.087	-0.639554	0.226641	-2.82188	0.00477429	0.0155444	AFUA_3G02050	Afu3G02050	Putative uncharacterized protein [Source:UniProtKB/TrEMBL
CADAFUAG00001150	578.648	-0.639128	0.128814	-4.96163	6.99044e-07	5.86377e-06	AFUA_7G01900	Afu7G01900	TOM core complex subunit Tom6; putative [Source:UniProtKB/TrEMBL
CADAFUAG00009403	43.468	-0.639102	0.361372	-1.76854	0.0769704	0.156223	AFUA_7G04030	Afu7G04030	Putative uncharacterized protein [Source:UniProtKB/TrEMBL
CADAFUAG00001162	8.06859	-0.638984	0.468125	-1.36498	0.172258	0.294412	AFUA_7G01060	Afu7G01060	Cysteine-rich secreted protein [Source:UniProtKB/TrEMBL
CADAFUAG00001568	42.4158	-0.638689	0.217761	-2.93298	0.0033573	0.0115238	AFUA_6G11330	Afu6G11330	Histidine acid phosphatase; putative [Source:UniProtKB/TrEMBL
CADAFUAG00006689	2.72592	-0.638619	1.00145	-0.637696	0.523671	0.667252	AFUA_5G09590	Afu5G09590	Putative uncharacterized protein [Source:UniProtKB/TrEMBL
CADAFUAG00006427	16560.1	-0.638147	0.193025	-3.30604	0.000946257	0.00381881	AFUA_5G11320	Afu5G11320	Thioredoxin [Source:UniProtKB/TrEMBL
CADAFUAG00008363	242.509	-0.637804	0.19643	-3.24698	0.00116635	0.00459265	AFUA_4G10660	Afu4G10660	Chromatin modification-related protein eaf3 [Source:UniProtKB/Swiss-Prot
CADAFUAG00007698	25.1131	-0.637668	0.269289	-2.36797	0.0178859	0.0476403	AFUA_1G14970	Afu1G14970	ADP-ribosylation factor family protein [Source:UniProtKB/TrEMBL
CADAFUAG00007287	410.581	-0.636118	0.25325	-2.51181	0.0120112	0.0339161	AFUA_1G16300	Afu1G16300	Putative uncharacterized protein [Source:UniProtKB/TrEMBL
CADAFUAG00000661	103.94	-0.636019	0.15933	-3.99183	6.55645e-05	0.000366754	AFUA_6G02515	Afu6G02515	Putative uncharacterized protein [Source:UniProtKB/TrEMBL
CADAFUAG00001379	15.8051	-0.635992	0.443239	-1.43487	0.151323	0.267144	AFUA_4G03230	Afu4G03230	Extracellular guanyl-specific ribonuclease RntA [Source:UniProtKB/TrEMBL
CADAFUAG00003633	70.2216	-0.635702	0.193415	-3.28673	0.00101356	0.00407184	AFUA_2G05750	Afu2G05750	Agmatinase; putative [Source:UniProtKB/TrEMBL
CADAFUAG00000527	2528.89	-0.635481	0.190786	-3.33087	0.000865765	0.00352912	AFUA_6G03620	Afu6G03620	FAD/FMN-containing isoamyl alcohol oxidase MreA [Source:UniProtKB/TrEMBL
CADAFUAG00000059	9.43904	-0.635449	0.474325	-1.33969	0.180346	0.305085	AFUA_3G03810	Afu3G03810	Putative uncharacterized protein [Source:UniProtKB/TrEMBL
CADAFUAG00006759	55.6006	-0.635375	0.300618	-2.11357	0.0345524	0.0818514	AFUA_5G08590	Afu5G08590	Endo-1;4-beta-xylanase; putative [Source:UniProtKB/TrEMBL
CADAFUAG00002135	846.916	-0.635319	0.198657	-3.19807	0.00138352	0.00532908	AFUA_6G12560	Afu6G12560	AAA family ATPase; putative [Source:UniProtKB/TrEMBL
CADAFUAG00006998	6913.41	-0.635149	0.133104	-4.77184	1.82549e-06	1.40629e-05	AFUA_1G10370	Afu1G10370	MFS multidrug transporter; putative [Source:UniProtKB/TrEMBL
CADAFUAG00008027	28.1468	-0.63435	0.295324	-2.14798	0.0317152	0.0764721	AFUA_4G06610	Afu4G06610	Putative uncharacterized protein [Source:UniProtKB/TrEMBL
CADAFUAG00005967	500.671	-0.634241	0.195747	-3.24011	0.00119484	0.00468188	AFUA_5G07760	Afu5G07760	Tetracycline-efflux transporter; putative [Source:UniProtKB/TrEMBL
CADAFUAG00004397	1567.02	-0.633772	0.147639	-4.29273	1.76494e-05	0.000112369	AFUA_2G08070	Afu2G08070	CorA family metal ion transporter; putative [Source:UniProtKB/TrEMBL
CADAFUAG00002856	21.3297	-0.633739	0.317666	-1.99499	0.0460443	0.103143	AFUA_5G03940	Afu5G03940	Alpha-1;3-glucanase; putative [Source:UniProtKB/TrEMBL
CADAFUAG00007348	17.3522	-0.633497	0.354774	-1.78563	0.0741585	0.151401	AFUA_1G16890	Afu1G16890	Transesterase (LovD); putative [Source:UniProtKB/TrEMBL
CADAFUAG00008469	359.181	-0.633312	0.185668	-3.41099	0.000647279	0.00274677	AFUA_4G07640	Afu4G07640	40S ribosomal protein S13 [Source:UniProtKB/TrEMBL
CADAFUAG00003557	1859.79	-0.632694	0.170383	-3.71336	0.000204528	0.00100374	AFUA_2G04100	Afu2G04100	Putative uncharacterized protein [Source:UniProtKB/TrEMBL
CADAFUAG00007987	188673	-0.632099	0.168377	-3.75407	0.000173986	0.000875969	AFUA_4G09360	Afu4G09360	ATP synthase subunit ATP9; putative [Source:UniProtKB/TrEMBL
CADAFUAG00006331	418.343	-0.632092	0.232213	-2.72204	0.00648809	0.0201847	AFUA_5G08580	Afu5G08580	Alpha-1;6-mannosyltransferase subunit (Och1); putative [Source:UniProtKB/TrEMBL
CADAFUAG00008606	42.0519	-0.631876	0.24154	-2.61603	0.00889594	0.0264316	AFUA_1G01960	Afu1G01960	Putative uncharacterized protein [Source:UniProtKB/TrEMBL
CADAFUAG00005900	1777.67	-0.631703	0.111484	-5.66629	1.45921e-08	1.58508e-07	AFUA_5G13500	Afu5G13500	RING finger domain protein; putative [Source:UniProtKB/TrEMBL
CADAFUAG00009510	73.2852	-0.631594	0.178116	-3.54596	0.000391184	0.00177798	AFUA_7G05270	Afu7G05270	COMPASS complex subunit Sdc1; putative [Source:UniProtKB/TrEMBL
CADAFUAG00004472	3.35122	-0.631462	1.04422	-0.604721	0.545365	0.685638	AFUA_2G12760	Afu2G12760	Putative uncharacterized protein [Source:UniProtKB/TrEMBL
CADAFUAG00008332	106484	-0.631204	0.223404	-2.82539	0.00472234	0.0154062	AFUA_4G10350	Afu4G10350	Polyubiquitin UbiD/Ubi4; putative [Source:UniProtKB/TrEMBL
CADAFUAG00003112	112.062	-0.630885	0.234304	-2.69259	0.00708987	0.0217369	AFUA_8G04230	Afu8G04230	Putative uncharacterized protein [Source:UniProtKB/TrEMBL
CADAFUAG00000848	305.818	-0.629605	0.244218	-2.57804	0.00993624	0.0289651	AFUA_8G00540	Afu8G00540	Nonribosomal peptide synthetase 14 [Source:UniProtKB/Swiss-Prot
CADAFUAG00000700	54.498	-0.629402	0.310818	-2.02499	0.0428684	0.0973982	AFUA_6G04550	Afu6G04550	Putative uncharacterized protein [Source:UniProtKB/TrEMBL
CADAFUAG00008746	48.2644	-0.628855	0.228935	-2.74687	0.00601666	0.0189301	AFUA_1G02390	Afu1G02390	Alpha/beta hydrolase; putative [Source:UniProtKB/TrEMBL
CADAFUAG00009384	7996.21	-0.628373	0.218238	-2.8793	0.00398562	0.0133155	AFUA_7G04290	Afu7G04290	Amino acid permease (Gap1); putative [Source:UniProtKB/TrEMBL
CADAFUAG00005648	323.624	-0.628091	0.200369	-3.13467	0.00172049	0.00642591	AFUA_3G09780	Afu3G09780	Putative uncharacterized protein [Source:UniProtKB/TrEMBL
CADAFUAG00009695	2.69106	-0.627241	1.07444	-0.583786	0.559364	0.696729	AFUA_3G03635	Afu3G03635
CADAFUAG00004888	30.4601	-0.627013	0.263358	-2.38084	0.0172733	0.0461848	AFUA_2G17290	Afu2G17290	Putative uncharacterized protein [Source:UniProtKB/TrEMBL
CADAFUAG00002102	0.747077	-0.627003	1.74311	-0.359703	0.71907	0.821576	AFUA_6G10180	Afu6G10180	Spherulin 4 family protein; putative [Source:UniProtKB/TrEMBL
CADAFUAG00000108	48.0132	-0.626909	0.384211	-1.63168	0.102748	0.197721	AFUA_3G03500	Afu3G03500	MFS multidrug transporter; putative [Source:UniProtKB/TrEMBL
CADAFUAG00005143	40.4088	-0.626303	0.519552	-1.20547	0.228023	0.365574	AFUA_3G14750	Afu3G14750	Fungal specific transcription factor; putative [Source:UniProtKB/TrEMBL
CADAFUAG00009234	9009.99	-0.6261	0.160348	-3.90463	9.43703e-05	0.000505829	AFUA_1G07470	Afu1G07470	Autophagy-related protein 8 [Source:UniProtKB/Swiss-Prot
CADAFUAG00000316	557.743	-0.624349	0.453609	-1.3764	0.168697	0.289868	AFUA_3G00710	Afu3G00710	Allergen Asp F4-like; putative [Source:UniProtKB/TrEMBL
CADAFUAG00003582	337.878	-0.624143	0.0956566	-6.52483	6.8078e-11	1.01667e-09	AFUA_2G02010	Afu2G02010	Transmembrane protein UsgS [Source:UniProtKB/TrEMBL
CADAFUAG00002560	263.304	-0.624079	0.15924	-3.91912	8.88744e-05	0.000479488	AFUA_5G03070	Afu5G03070	WD repeat protein [Source:UniProtKB/TrEMBL
CADAFUAG00005494	1571.57	-0.623735	0.221807	-2.81206	0.00492248	0.0159415	AFUA_3G14530	Afu3G14530	Lipase/esterase family protein; putative [Source:UniProtKB/TrEMBL
CADAFUAG00004219	4907.2	-0.62212	0.286761	-2.16947	0.0300467	0.0730833	AFUA_2G11060	Afu2G11060	Acyl CoA binding protein family [Source:UniProtKB/TrEMBL
CADAFUAG00008434	313.876	-0.621828	0.173723	-3.57941	0.000344365	0.00159805	AFUA_4G08790	Afu4G08790	Dienelactone hydrolase family protein [Source:UniProtKB/TrEMBL
CADAFUAG00005328	1146.54	-0.621738	0.0948309	-6.55628	5.51655e-11	8.34089e-10	AFUA_3G11990	Afu3G11990	C6 transcription factor (Mut3); putative [Source:UniProtKB/TrEMBL
CADAFUAG00000899	1.28384	-0.621238	1.2077	-0.514398	0.606973	0.736612	AFUA_8G00880	Afu8G00880	Putative uncharacterized protein [Source:UniProtKB/TrEMBL
CADAFUAG00000958	6.46018	-0.620925	0.649699	-0.955712	0.339218	0.49039	AFUA_8G02160	Afu8G02160	Aldehyde dehydrogenase family protein [Source:UniProtKB/TrEMBL
CADAFUAG00003683	6.86156	-0.620853	0.581971	-1.06681	0.286057	0.432915	AFUA_2G01680	Afu2G01680	Monooxygenase; putative [Source:UniProtKB/TrEMBL
CADAFUAG00008190	52.5795	-0.620528	0.242673	-2.55706	0.0105562	0.0304172	AFUA_4G14530	Afu4G14530	Glutathione S-transferase Ure2-like; putative [Source:UniProtKB/TrEMBL
CADAFUAG00004481	0.181064	-0.620342	3.79337	-0.163533	0.870099	0.923471	AFUA_2G12660	Afu2G12660	Polyprenyl synthetase family protein [Source:UniProtKB/TrEMBL
CADAFUAG00008247	58.1218	-0.620196	0.236715	-2.62001	0.00879264	0.0261653	AFUA_4G10880	Afu4G10880	Putative uncharacterized protein [Source:UniProtKB/TrEMBL
CADAFUAG00003637	16614.3	-0.620046	0.207198	-2.99253	0.00276679	0.0097804	AFUA_2G01010	Afu2G01010	Myo-inositol-phosphate synthase; putative [Source:UniProtKB/TrEMBL
CADAFUAG00001707	1064.06	-0.619793	0.15711	-3.94497	7.9811e-05	0.000435616	AFUA_6G06640	Afu6G06640	FK506 suppressor Sfk1; putative [Source:UniProtKB/TrEMBL
CADAFUAG00002352	330.778	-0.619788	0.114961	-5.39131	6.99442e-08	6.88954e-07	AFUA_6G10100	Afu6G10100	MFS monocarboxylate transporter; putative [Source:UniProtKB/TrEMBL
CADAFUAG00006537	156.574	-0.619754	0.319087	-1.94227	0.0521039	0.114052	AFUA_5G12960	Afu5G12960	BZIP transcription factor (Atf21); putative [Source:UniProtKB/TrEMBL
CADAFUAG00007523	1058.55	-0.61788	0.105307	-5.86741	4.42665e-09	5.28697e-08	AFUA_1G08760	Afu1G08760	Delta-aminolevulinic acid dehydratase [Source:UniProtKB/TrEMBL
CADAFUAG00007638	4921.3	-0.617704	0.139599	-4.42484	9.65118e-06	6.45759e-05	AFUA_1G12560	Afu1G12560	Endoglucanase; putative [Source:UniProtKB/TrEMBL
CADAFUAG00006198	101.921	-0.617658	0.289604	-2.13277	0.032944	0.078887	AFUA_5G06790	Afu5G06790	Putative uncharacterized protein [Source:UniProtKB/TrEMBL
CADAFUAG00002581	61760.4	-0.617472	0.106492	-5.79828	6.6998e-09	7.72663e-08	AFUA_5G01970	Afu5G01970	Glyceraldehyde-3-phosphate dehydrogenase [Source:UniProtKB/TrEMBL
CADAFUAG00007002	162.364	-0.617465	0.238069	-2.59364	0.0094965	0.0278759	AFUA_1G15420	Afu1G15420	LysM domain protein [Source:UniProtKB/TrEMBL
CADAFUAG00007079	39591.8	-0.617225	0.19209	-3.2132	0.00131264	0.00508929	AFUA_1G13750	Afu1G13750	C2H2 transcription factor (Rpn4); putative [Source:UniProtKB/TrEMBL
CADAFUAG00004388	226.577	-0.617131	0.130737	-4.72038	2.354e-06	1.79074e-05	AFUA_2G08860	Afu2G08860	Exosome complex endonuclease 2/ribosomal RNA processing protein; putative [Source:UniProtKB/TrEMBL
CADAFUAG00006603	243.374	-0.617114	0.122491	-5.03806	4.70278e-07	4.05683e-06	AFUA_5G08600	Afu5G08600	Homoserine O-acetyltransferase [Source:UniProtKB/TrEMBL
CADAFUAG00006344	524.422	-0.616995	0.244348	-2.52506	0.0115677	0.0328067	AFUA_5G14000	Afu5G14000	Oxidoreductase; short chain dehydrogenase/reductase family [Source:UniProtKB/TrEMBL
CADAFUAG00000565	60.1938	-0.616878	0.273224	-2.25777	0.0239598	0.0606146	AFUA_6G02705	Afu6G02705	Putative uncharacterized protein [Source:UniProtKB/TrEMBL
CADAFUAG00009081	106.794	-0.616364	0.20508	-3.00548	0.0026516	0.00941866	AFUA_1G05150	Afu1G05150	C2H2 transcription factor (TFIIIA); putative [Source:UniProtKB/TrEMBL
CADAFUAG00006033	963.357	-0.615967	0.150758	-4.08581	4.3924e-05	0.000254943	AFUA_5G08650	Afu5G08650	Putative uncharacterized protein [Source:UniProtKB/TrEMBL
CADAFUAG00006487	937.887	-0.615357	0.130116	-4.72929	2.25303e-06	1.71796e-05	AFUA_5G09320	Afu5G09320	Signal transduction protein Syg1; putative [Source:UniProtKB/TrEMBL
CADAFUAG00005442	552.111	-0.61532	0.0985608	-6.24305	4.29114e-10	5.83476e-09	AFUA_3G08980	Afu3G08980	Threonine synthase Thr4; putative [Source:UniProtKB/TrEMBL
CADAFUAG00008206	28.6386	-0.615298	0.379322	-1.6221	0.104782	0.200647	AFUA_4G14520	Afu4G14520	Toxin biosynthesis protein; putative [Source:UniProtKB/TrEMBL
CADAFUAG00001687	245.258	-0.615062	0.143629	-4.28229	1.8498e-05	0.000117235	AFUA_6G12240	Afu6G12240	Glycerophosphoryl diester phosphodiesterase family protein [Source:UniProtKB/TrEMBL
CADAFUAG00002194	103.219	-0.614946	0.280824	-2.18979	0.0285393	0.0702961	AFUA_6G06530	Afu6G06530	Putative uncharacterized protein [Source:UniProtKB/TrEMBL
CADAFUAG00003849	14.667	-0.614535	0.442477	-1.38885	0.164878	0.284954	AFUA_2G04690	Afu2G04690	Nucleoside transporter; putative [Source:UniProtKB/TrEMBL
CADAFUAG00005324	171.163	-0.614271	0.136243	-4.50865	6.52417e-06	4.52088e-05	AFUA_3G09750	Afu3G09750	rRNA processing protein Utp6; putative [Source:UniProtKB/TrEMBL
CADAFUAG00002496	12.4889	-0.613768	0.444418	-1.38106	0.16726	0.28801	AFUA_4G00330	Afu4G00330	Putative uncharacterized protein [Source:UniProtKB/TrEMBL
CADAFUAG00001145	167.808	-0.613387	0.208382	-2.94357	0.00324456	0.0112095	AFUA_7G02320	Afu7G02320	Putative uncharacterized protein [Source:UniProtKB/TrEMBL
CADAFUAG00005034	124.012	-0.613358	0.271161	-2.26197	0.0236995	0.0600642	AFUA_3G11650	Afu3G11650	Putative uncharacterized protein [Source:UniProtKB/TrEMBL
CADAFUAG00001960	11935.5	-0.613236	0.171466	-3.57643	0.00034832	0.00161332	AFUA_6G06770	Afu6G06770	Enolase [Source:UniProtKB/Swiss-Prot
CADAFUAG00002052	491.628	-0.612889	0.216898	-2.82571	0.00471763	0.015396	AFUA_6G06670	Afu6G06670	Putative uncharacterized protein [Source:UniProtKB/TrEMBL
CADAFUAG00005714	145.318	-0.612735	0.222674	-2.75172	0.00592838	0.0187068	AFUA_3G08370	Afu3G08370	Putative uncharacterized protein [Source:UniProtKB/TrEMBL
CADAFUAG00001401	1195.66	-0.61203	0.114651	-5.3382	9.38763e-08	9.10844e-07	AFUA_4G02940	Afu4G02940
CADAFUAG00007973	66.7553	-0.611972	0.256565	-2.38525	0.0170675	0.045736	AFUA_4G08290	Afu4G08290	Putative uncharacterized protein [Source:UniProtKB/TrEMBL
CADAFUAG00004650	6.92943	-0.611685	0.557371	-1.09745	0.272446	0.417056	AFUA_2G17260	Afu2G17260	Phosphoesterase; putative [Source:UniProtKB/TrEMBL
CADAFUAG00008076	97.6653	-0.611536	0.235641	-2.5952	0.0094535	0.0277832	AFUA_4G06085	Afu4G06085	Putative uncharacterized protein [Source:UniProtKB/TrEMBL
CADAFUAG00000725	2.8353	-0.611522	1.19854	-0.510223	0.609895	0.739121	AFUA_6G03300	Afu6G03300	Putative uncharacterized protein [Source:UniProtKB/TrEMBL
CADAFUAG00004553	2043.56	-0.61123	0.146272	-4.17873	2.93142e-05	0.000178455	AFUA_2G09310	Afu2G09310	Mitochondrial ATP synthase epsilon chain domain-containing protein [Source:UniProtKB/TrEMBL
CADAFUAG00003884	54.72	-0.610985	0.226511	-2.69737	0.00698892	0.021502	AFUA_2G04950	Afu2G04950	Putative uncharacterized protein [Source:UniProtKB/TrEMBL
CADAFUAG00001025	1359.78	-0.610823	0.24747	-2.46827	0.0135767	0.0377446	AFUA_7G00700	Afu7G00700	Aldo-keto reductase (AKR13); puatative [Source:UniProtKB/TrEMBL
CADAFUAG00001346	1013.16	-0.610472	0.141967	-4.30009	1.70732e-05	0.000108914	AFUA_4G03950	Afu4G03950	Cystathionine beta-lyase MetG [Source:UniProtKB/TrEMBL
CADAFUAG00006990	83.6681	-0.610262	0.241608	-2.52584	0.0115423	0.0327729	AFUA_1G16635	Afu1G16635	DSBA family oxidoreductase; putative [Source:UniProtKB/TrEMBL
CADAFUAG00009793	0.572706	-0.610177	2.27829	-0.267822	0.788836	0.872766	AFUA_5G12356	Afu5G12356
CADAFUAG00003078	40.4005	-0.609836	0.26552	-2.29676	0.0216326	0.0556057	AFUA_8G05740	Afu8G05740	RTA1 domain protein; putative [Source:UniProtKB/TrEMBL
CADAFUAG00002035	71.1041	-0.609767	0.182938	-3.33318	0.000858587	0.00350378	AFUA_6G09410	Afu6G09410	Putative uncharacterized protein [Source:UniProtKB/TrEMBL
CADAFUAG00002398	267.261	-0.609311	0.30285	-2.01193	0.0442277	0.0998996	AFUA_4G01515	Afu4G01515
CADAFUAG00003219	1734.32	-0.609165	0.146194	-4.16682	3.08876e-05	0.000186631	AFUA_8G06440	Afu8G06440	Fructosyl amino acid oxidase; putative [Source:UniProtKB/TrEMBL
CADAFUAG00005836	181.202	-0.609065	0.375316	-1.62281	0.104631	0.200495	AFUA_3G11490	Afu3G11490	GABA permease; putative [Source:UniProtKB/TrEMBL
CADAFUAG00008048	84.9696	-0.608894	0.3087	-1.97245	0.0485585	0.107659	AFUA_4G07980	Afu4G07980	Putative uncharacterized protein [Source:UniProtKB/TrEMBL
CADAFUAG00006208	184.361	-0.60889	0.17857	-3.40982	0.000650063	0.00275498	AFUA_5G09180	Afu5G09180	Putative uncharacterized protein [Source:UniProtKB/TrEMBL
CADAFUAG00001120	105.066	-0.608559	0.177442	-3.42963	0.000604409	0.00258743	AFUA_7G02400	Afu7G02400	Alcohol dehydrogenase; zinc-containing [Source:UniProtKB/TrEMBL
CADAFUAG00003877	89.4944	-0.607614	0.213008	-2.85254	0.00433717	0.014335	AFUA_2G05560	Afu2G05560	RNA exonuclease 4 [Source:UniProtKB/Swiss-Prot
CADAFUAG00000505	144.36	-0.607294	0.20709	-2.93251	0.0033623	0.0115343	AFUA_6G04640	Afu6G04640	Hydrolase; alpha/beta fold family; putative [Source:UniProtKB/TrEMBL
CADAFUAG00001013	1891.4	-0.606544	0.130309	-4.65466	3.24518e-06	2.40391e-05	AFUA_8G00460	Afu8G00460	Methionine aminopeptidase [Source:UniProtKB/TrEMBL
CADAFUAG00004244	29.0361	-0.606367	0.291873	-2.0775	0.037755	0.0879172	AFUA_2G17890	Afu2G17890	RTA1 domain protein; putative [Source:UniProtKB/TrEMBL
CADAFUAG00001492	724.752	-0.605206	0.33049	-1.83124	0.067065	0.139599	AFUA_6G00510	Afu6G00510	NADP-dependent alcohol dehydrogenase [Source:UniProtKB/TrEMBL
CADAFUAG00001235	346.429	-0.604513	0.344101	-1.75679	0.0789534	0.159581	AFUA_7G00450	Afu7G00450	GPI anchored protein; putative [Source:UniProtKB/TrEMBL
CADAFUAG00003691	155.134	-0.60438	0.252027	-2.39808	0.0164814	0.0443281	AFUA_2G05085	Afu2G05085	Acetyltransferase; GNAT family; putative [Source:UniProtKB/TrEMBL
CADAFUAG00007953	47.3953	-0.604121	0.262173	-2.30428	0.0212067	0.0547892	AFUA_4G13450	Afu4G13450	RNA methyltransferase; TrmH family family [Source:UniProtKB/TrEMBL
CADAFUAG00002735	3028.64	-0.603634	0.228438	-2.64244	0.00823107	0.0246831	AFUA_5G01910	Afu5G01910	Aldo-keto reductase (AKR); putative [Source:UniProtKB/TrEMBL
CADAFUAG00002163	131.468	-0.603114	0.205712	-2.93184	0.00336965	0.0115514	AFUA_6G08540	Afu6G08540	C6 finger domain protein; putative [Source:UniProtKB/TrEMBL
CADAFUAG00004353	122.912	-0.602209	0.178458	-3.37452	0.000739438	0.00309596	AFUA_2G09460	Afu2G09460	Potassium transporter [Source:UniProtKB/TrEMBL
CADAFUAG00003783	13.9156	-0.601697	0.387818	-1.55149	0.120783	0.224609	AFUA_2G05700	Afu2G05700	Putative uncharacterized protein [Source:UniProtKB/TrEMBL
CADAFUAG00000384	50.669	-0.600951	0.341688	-1.75877	0.0786166	0.159051	AFUA_3G01500	Afu3G01500	Integral membrane protein [Source:UniProtKB/TrEMBL
CADAFUAG00008502	53.878	-0.600244	0.274043	-2.19032	0.0285008	0.0702549	AFUA_4G06370	Afu4G06370	Putative uncharacterized protein [Source:UniProtKB/TrEMBL
CADAFUAG00007253	3050.8	-0.599098	0.24961	-2.40014	0.016389	0.0441489	AFUA_1G12620	Afu1G12620	MFS toxin efflux pump (AflT); putative [Source:UniProtKB/TrEMBL
CADAFUAG00006458	216.375	-0.598761	0.179162	-3.342	0.000831759	0.00341774	AFUA_5G13610	Afu5G13610	Putative uncharacterized protein [Source:UniProtKB/TrEMBL
CADAFUAG00004779	367.804	-0.598564	0.104733	-5.71513	1.09619e-08	1.21658e-07	AFUA_2G09760	Afu2G09760	Putative uncharacterized protein [Source:UniProtKB/TrEMBL
CADAFUAG00003419	3.31935	-0.598444	0.885095	-0.676135	0.498955	0.645745	AFUA_2G00260	Afu2G00260	Phenylacetaldoxime dehydratase family protein; putative [Source:UniProtKB/TrEMBL
CADAFUAG00004916	114.913	-0.597591	0.15943	-3.74829	0.000178047	0.000893636	AFUA_2G15600	Afu2G15600	Putative uncharacterized protein [Source:UniProtKB/TrEMBL
CADAFUAG00009441	2569.5	-0.597453	0.164754	-3.62632	0.000287484	0.00136138	AFUA_7G04710	Afu7G04710	NF-X1 finger transcription factor; putative [Source:UniProtKB/TrEMBL
CADAFUAG00004331	138.416	-0.597222	0.177244	-3.36949	0.000753069	0.00314356	AFUA_2G09000	Afu2G09000	Putative uncharacterized protein [Source:UniProtKB/TrEMBL
CADAFUAG00000850	73.4543	-0.596868	0.3054	-1.95438	0.0506566	0.111472	AFUA_8G01330	Afu8G01330	Putative uncharacterized protein [Source:UniProtKB/TrEMBL
CADAFUAG00000636	122.577	-0.596849	0.190639	-3.13079	0.00174338	0.00649641	AFUA_6G04330	Afu6G04330	DEAH-box RNA helicase (Dhr1); putative [Source:UniProtKB/TrEMBL
CADAFUAG00006531	267.837	-0.596764	0.164169	-3.63505	0.000277924	0.00131997	AFUA_5G08110	Afu5G08110	Origin recognition complex subunit 2; putative [Source:UniProtKB/TrEMBL
CADAFUAG00006588	2522.75	-0.595838	0.131466	-4.53227	5.83536e-06	4.08728e-05	AFUA_5G09220	Afu5G09220	Beige/BEACH domain protein [Source:UniProtKB/TrEMBL
CADAFUAG00008985	11.9561	-0.59577	0.404726	-1.47203	0.141012	0.253217	AFUA_1G02860	Afu1G02860	C2H2 transcription factor; putative [Source:UniProtKB/TrEMBL
CADAFUAG00004061	104.307	-0.595643	0.249931	-2.38323	0.0171616	0.0459249	AFUA_2G09930	Afu2G09930	Putative uncharacterized protein [Source:UniProtKB/TrEMBL
CADAFUAG00007802	583.672	-0.595372	0.240545	-2.47509	0.0133202	0.037127	AFUA_4G12590	Afu4G12590	Putative uncharacterized protein [Source:UniProtKB/TrEMBL
CADAFUAG00001958	65.9156	-0.595241	0.211084	-2.81993	0.00480347	0.015629	AFUA_6G07060	Afu6G07060	Alpha/beta hydrolase family protein; putative [Source:UniProtKB/TrEMBL
CADAFUAG00002226	86.6968	-0.594995	0.203525	-2.92345	0.00346179	0.0118068	AFUA_6G08770	Afu6G08770	Ankyrin repeat protein [Source:UniProtKB/TrEMBL
CADAFUAG00000067	69.6324	-0.594907	0.294531	-2.01985	0.0433994	0.0983058	AFUA_3G00560	Afu3G00560	Putative uncharacterized protein [Source:UniProtKB/TrEMBL
CADAFUAG00006707	102.766	-0.594893	0.255747	-2.3261	0.0200134	0.0522618	AFUA_5G06490	Afu5G06490	Putative uncharacterized protein [Source:UniProtKB/TrEMBL
CADAFUAG00005760	10.2322	-0.594702	0.670399	-0.887087	0.375032	0.526051	AFUA_3G13580	Afu3G13580	Dynamin GTPase; putative [Source:UniProtKB/TrEMBL
CADAFUAG00003647	291.51	-0.593933	0.181559	-3.27129	0.00107059	0.00427797	AFUA_2G05930	Afu2G05930	Small nucleolar ribonucleoprotein complex subunit; putative [Source:UniProtKB/TrEMBL
CADAFUAG00003835	223.645	-0.593647	0.19362	-3.06603	0.00216918	0.00790138	AFUA_2G02710	Afu2G02710	60S ribosomal protein L24b [Source:UniProtKB/TrEMBL
CADAFUAG00002670	14.7574	-0.593553	0.385397	-1.54011	0.123534	0.228893	AFUA_5G01100	Afu5G01100	Putative uncharacterized protein [Source:UniProtKB/TrEMBL
CADAFUAG00005873	73.2887	-0.592708	0.199924	-2.96466	0.00303019	0.0105838	AFUA_3G11340	Afu3G11340	Transthyretin domain protein [Source:UniProtKB/TrEMBL
CADAFUAG00009113	607.88	-0.592698	0.131766	-4.49809	6.85658e-06	4.72763e-05	AFUA_1G05820	Afu1G05820	Putative uncharacterized protein [Source:UniProtKB/TrEMBL
CADAFUAG00002646	150.521	-0.592439	0.210628	-2.81273	0.00491229	0.0159191	AFUA_5G04336	Afu5G04336	Putative uncharacterized protein [Source:UniProtKB/TrEMBL
CADAFUAG00004867	162.687	-0.592424	0.12757	-4.64392	3.41868e-06	2.51982e-05	AFUA_2G09900	Afu2G09900	Putative uncharacterized protein [Source:UniProtKB/TrEMBL
CADAFUAG00001539	1.20947	-0.59242	1.35459	-0.437343	0.661863	0.779585	AFUA_6G00350	Afu6G00350	Putative uncharacterized protein [Source:UniProtKB/TrEMBL
CADAFUAG00000038	722.783	-0.592195	0.16142	-3.66867	0.000243817	0.00117776	AFUA_3G04150	Afu3G04150	Mitochondrial enoyl reductase; putative [Source:UniProtKB/TrEMBL
CADAFUAG00008387	535.776	-0.591551	0.12377	-4.77945	1.75776e-06	1.36276e-05	AFUA_4G10420	Afu4G10420	DNA binding protein SART-1; putative [Source:UniProtKB/TrEMBL
CADAFUAG00007210	234.004	-0.590657	0.314221	-1.87975	0.0601421	0.127832	AFUA_1G14450	Afu1G14450	Exo-beta-1;3-glucanase Exg0 [Source:UniProtKB/TrEMBL
CADAFUAG00008761	758.931	-0.590509	0.140417	-4.2054	2.60618e-05	0.000160184	AFUA_1G07210	Afu1G07210	Putative uncharacterized protein [Source:UniProtKB/TrEMBL
CADAFUAG00004133	26.7714	-0.589812	0.294586	-2.00217	0.0452661	0.101743	AFUA_2G14497	Afu2G14497	2-dehydropantoate 2-reductase [Source:UniProtKB/TrEMBL
CADAFUAG00006631	35.53	-0.589723	0.241535	-2.44156	0.0146241	0.0401859	AFUA_5G09060	Afu5G09060	RNA binding protein; putative [Source:UniProtKB/TrEMBL
CADAFUAG00004171	583.668	-0.589552	0.211003	-2.79405	0.00520529	0.0167292	AFUA_2G16780	Afu2G16780	DDT domain protein [Source:UniProtKB/TrEMBL
CADAFUAG00004935	321.772	-0.589404	0.100737	-5.85089	4.88957e-09	5.79007e-08	AFUA_3G08265	Afu3G08265	Putative uncharacterized protein [Source:UniProtKB/TrEMBL
CADAFUAG00004394	144.248	-0.588831	0.142963	-4.11876	3.80924e-05	0.000224854	AFUA_2G08230	Afu2G08230	MFS transporter; putative [Source:UniProtKB/TrEMBL
CADAFUAG00004684	483.758	-0.588653	0.180099	-3.2685	0.0010812	0.00431504	AFUA_2G13960	Afu2G13960	Tafazzin [Source:UniProtKB/TrEMBL
CADAFUAG00001612	133.496	-0.587242	0.257752	-2.27832	0.0227072	0.0578966	AFUA_6G08400	Afu6G08400	Putative uncharacterized protein [Source:UniProtKB/TrEMBL
CADAFUAG00002703	55.6115	-0.586202	0.248798	-2.35614	0.0184662	0.0488912	AFUA_5G00620	Afu5G00620	Integral membrane protein; putative [Source:UniProtKB/TrEMBL
CADAFUAG00007834	1181.76	-0.585878	0.0735962	-7.96071	1.71059e-15	4.20067e-14	AFUA_4G10410	Afu4G10410	Aspartate aminotransferase; putative [Source:UniProtKB/TrEMBL
CADAFUAG00002795	101.629	-0.585242	0.170451	-3.43348	0.00059588	0.00256107	AFUA_5G01160	Afu5G01160	MFS monosaccharide transporter; putative [Source:UniProtKB/TrEMBL
CADAFUAG00003482	184.907	-0.584588	0.181593	-3.21922	0.00128539	0.00499465	AFUA_2G02340	Afu2G02340	Exosome complex exonuclease Rrp40; putative [Source:UniProtKB/TrEMBL
CADAFUAG00000900	460.853	-0.583999	0.139901	-4.17437	2.98806e-05	0.000181449	AFUA_8G00590	Afu8G00590	Fatty acid desaturase; putative [Source:UniProtKB/TrEMBL
CADAFUAG00006166	240.746	-0.583706	0.195321	-2.98844	0.00280407	0.00987365	AFUA_5G12220	Afu5G12220	Putative uncharacterized protein [Source:UniProtKB/TrEMBL
CADAFUAG00002780	11.552	-0.583687	0.501681	-1.16346	0.244642	0.383677	AFUA_5G01170	Afu5G01170	Protein sym1 [Source:UniProtKB/Swiss-Prot
CADAFUAG00000318	13259.8	-0.583513	0.127325	-4.58285	4.58675e-06	3.29825e-05	AFUA_3G03440	Afu3G03440	MFS siderophore iron transporter; putative [Source:UniProtKB/TrEMBL
CADAFUAG00009272	577.875	-0.582972	0.129325	-4.50782	6.54967e-06	4.53532e-05	AFUA_1G05620	Afu1G05620	Phenylalanyl-tRNA synthetase; beta subunit [Source:UniProtKB/TrEMBL
CADAFUAG00001558	171.32	-0.582734	0.262114	-2.22321	0.0262014	0.0653825	AFUA_6G00670	Afu6G00670	Extracellular serine-rich protein [Source:UniProtKB/TrEMBL
CADAFUAG00000185	381.314	-0.582667	0.166264	-3.50446	0.000457535	0.00203298	AFUA_3G04300	Afu3G04300	Actin cytoskeleton organization and biogenesis protein; putative [Source:UniProtKB/TrEMBL
CADAFUAG00007357	43.632	-0.582663	0.22801	-2.55543	0.0106057	0.0305104	AFUA_1G14695	Afu1G14695	DNA repair protein Dds20/Mei5; putative [Source:UniProtKB/TrEMBL
CADAFUAG00002879	49.1878	-0.582657	0.268333	-2.1714	0.0299013	0.0728756	AFUA_5G03360	Afu5G03360	NADH pyrophosphatase; putative [Source:UniProtKB/TrEMBL
CADAFUAG00008004	1455.55	-0.581892	0.102988	-5.65008	1.60373e-08	1.72472e-07	AFUA_4G06780	Afu4G06780	Mitochondrial carrier protein; putative [Source:UniProtKB/TrEMBL
CADAFUAG00007566	85.2667	-0.581773	0.182569	-3.18659	0.0014396	0.005517	AFUA_1G16810	Afu1G16810	Aminotransferase; class III [Source:UniProtKB/TrEMBL
CADAFUAG00003072	8.9129	-0.581676	0.554463	-1.04908	0.294141	0.441779	AFUA_8G06680	Afu8G06680	Acyl-CoA thioesterase; putative [Source:UniProtKB/TrEMBL
CADAFUAG00006513	4457.63	-0.58031	0.165542	-3.50553	0.000455707	0.00202764	AFUA_5G05610	Afu5G05610	Cell cycle control protein Cwf14/Bud31; putative [Source:UniProtKB/TrEMBL
CADAFUAG00006480	158.582	-0.580294	0.166305	-3.48933	0.000484236	0.00213891	AFUA_5G05660	Afu5G05660	Putative uncharacterized protein [Source:UniProtKB/TrEMBL
CADAFUAG00006348	952.838	-0.579923	0.203036	-2.85627	0.00428657	0.014191	AFUA_5G09910	Afu5G09910	Nitroreductase family protein; putative [Source:UniProtKB/TrEMBL
CADAFUAG00005617	240.608	-0.579818	0.16406	-3.53418	0.000409042	0.00184534	AFUA_3G08120	Afu3G08120	PWI domain mRNA processing protein; putative [Source:UniProtKB/TrEMBL
CADAFUAG00008352	3417.62	-0.579764	0.230101	-2.51961	0.0117486	0.0332808	AFUA_4G05860	Afu4G05860	NADH-ubiquinone oxidoreductase subunit B; putative [Source:UniProtKB/TrEMBL
CADAFUAG00000537	10603.5	-0.579383	0.158253	-3.66111	0.000251127	0.00120745	AFUA_6G04920	Afu6G04920	NAD-dependent formate dehydrogenase AciA/Fdh [Source:UniProtKB/TrEMBL
CADAFUAG00004870	101.602	-0.579057	0.187035	-3.09599	0.00196159	0.00722371	AFUA_2G08320	Afu2G08320	U3 small nucleolar ribonucleoprotein subunit (Imp3); putative [Source:UniProtKB/TrEMBL
CADAFUAG00001840	61.234	-0.578657	0.293111	-1.97419	0.0483599	0.107268	AFUA_6G10860	Afu6G10860	Putative uncharacterized protein [Source:UniProtKB/TrEMBL
CADAFUAG00003043	52.7332	-0.578598	0.232346	-2.49024	0.0127657	0.0358176	AFUA_8G05430	Afu8G05430	Ribosome biogenesis protein Noc4; putative [Source:UniProtKB/TrEMBL
CADAFUAG00006583	170.413	-0.577638	0.245273	-2.35508	0.0185186	0.0489631	AFUA_5G09570	Afu5G09570	WW domain protein [Source:UniProtKB/TrEMBL
CADAFUAG00008286	270.292	-0.577441	0.151139	-3.82059	0.000133132	0.000691773	AFUA_4G05970	Afu4G05970	Para-hydroxybenzoate-polyprenyltransferase Coq2; putative [Source:UniProtKB/TrEMBL
CADAFUAG00000748	35.62	-0.576646	0.28049	-2.05585	0.0397966	0.0918822	AFUA_6G03020	Afu6G03020	Flavin-binding monooxygenase; putative [Source:UniProtKB/TrEMBL
CADAFUAG00002701	193.262	-0.576302	0.172539	-3.34013	0.000837405	0.00343803	AFUA_5G02200	Afu5G02200	Mitochondrial import inner membrane translocase subunit (TIM22); putative [Source:UniProtKB/TrEMBL
CADAFUAG00007633	501.461	-0.576218	0.140557	-4.09954	4.13972e-05	0.00024172	AFUA_1G10310	Afu1G10310	RNase L inhibitor of the ABC superfamily; putative [Source:UniProtKB/TrEMBL
CADAFUAG00006621	130.621	-0.576091	0.201112	-2.86453	0.00417624	0.0138666	AFUA_5G07270	Afu5G07270	Putative uncharacterized protein [Source:UniProtKB/TrEMBL
CADAFUAG00000076	0.884009	-0.575743	2.15172	-0.267573	0.789028	0.872766	AFUA_3G00600	Afu3G00600	Putative uncharacterized protein [Source:UniProtKB/TrEMBL
CADAFUAG00007298	371.11	-0.574799	0.126377	-4.5483	5.40807e-06	3.82102e-05	AFUA_1G10320	Afu1G10320	Formin binding protein (FNB3); putative [Source:UniProtKB/TrEMBL
CADAFUAG00001146	23.1421	-0.574699	0.357172	-1.60903	0.10761	0.204814	AFUA_7G01560	Afu7G01560	FAD dependent oxidoreductase; putative [Source:UniProtKB/TrEMBL
CADAFUAG00005502	1643.12	-0.5743	0.149158	-3.85028	0.000117982	0.00061966	AFUA_3G07160	Afu3G07160	Class V chitinase; putative [Source:UniProtKB/TrEMBL
CADAFUAG00006136	254.974	-0.574183	0.143496	-4.00138	6.2974e-05	0.000353634	AFUA_5G13530	Afu5G13530	Exosome complex subunit Csl4; putative [Source:UniProtKB/TrEMBL
CADAFUAG00008475	21.1263	-0.574176	0.29933	-1.9182	0.055085	0.119061	AFUA_4G10450	Afu4G10450	Putative uncharacterized protein [Source:UniProtKB/TrEMBL
CADAFUAG00002271	211.926	-0.573993	0.178774	-3.21071	0.00132406	0.00512235	AFUA_6G07130	Afu6G07130	C6 transcription factor; putative [Source:UniProtKB/TrEMBL
CADAFUAG00007864	13.3398	-0.573701	0.392572	-1.46139	0.143908	0.256523	AFUA_4G12150	Afu4G12150	HIT domain protein [Source:UniProtKB/TrEMBL
CADAFUAG00002158	937.867	-0.573555	0.138905	-4.12911	3.64175e-05	0.000216281	AFUA_6G11380	Afu6G11380	Mitochondrial import receptor subunit (Tom20); putative [Source:UniProtKB/TrEMBL
CADAFUAG00003736	81.4127	-0.572731	0.27204	-2.10532	0.0352636	0.0832523	AFUA_2G01290	Afu2G01290	Polyketide synthase; putative [Source:UniProtKB/TrEMBL
CADAFUAG00002175	27.0294	-0.57266	0.374709	-1.52828	0.126443	0.232994	AFUA_6G08280	Afu6G08280	Ankyrin repeat protein [Source:UniProtKB/TrEMBL
CADAFUAG00002567	56.1745	-0.571886	0.260932	-2.19171	0.0284006	0.0700434	AFUA_5G01520	Afu5G01520	MFS transporter; putative [Source:UniProtKB/TrEMBL
CADAFUAG00000544	98.3354	-0.571588	0.191233	-2.98896	0.00279926	0.00986388	AFUA_6G02820	Afu6G02820	Metalloreductase; putative [Source:UniProtKB/TrEMBL
CADAFUAG00009207	38.392	-0.570143	0.315584	-1.80663	0.0708204	0.145848	AFUA_1G04730	Afu1G04730	Probable xyloglucan-specific endo-beta-1;4-glucanase A [Source:UniProtKB/Swiss-Prot
CADAFUAG00006514	1786.28	-0.569506	0.152062	-3.74521	0.000180243	0.000903258	AFUA_5G07890	Afu5G07890	Single-stranded DNA-binding protein [Source:UniProtKB/TrEMBL
CADAFUAG00007267	16341.8	-0.568915	0.161886	-3.51429	0.00044093	0.00197636	AFUA_1G09940	Afu1G09940	Putative uncharacterized protein [Source:UniProtKB/TrEMBL
CADAFUAG00007996	150.288	-0.568912	0.159703	-3.56232	0.000367598	0.00169054	AFUA_4G11750	Afu4G11750	Putative uncharacterized protein [Source:UniProtKB/TrEMBL
CADAFUAG00004582	93.9384	-0.568807	0.255713	-2.2244	0.0261217	0.0652172	AFUA_2G13050	Afu2G13050	Arylesterase/monoxygenase [Source:UniProtKB/TrEMBL
CADAFUAG00004761	14587.6	-0.568674	0.238526	-2.38412	0.0171202	0.0458394	AFUA_2G16430	Afu2G16430	Putative uncharacterized protein [Source:UniProtKB/TrEMBL
CADAFUAG00001741	218.024	-0.568452	0.15194	-3.74129	0.000183076	0.000914626	AFUA_6G13290	Afu6G13290	SWI/SNF family DNA-dependent ATPase Ris1; putative [Source:UniProtKB/TrEMBL
CADAFUAG00000994	3.15273	-0.568416	1.01172	-0.561832	0.574231	0.709361	AFUA_8G01470	Afu8G01470	Flavin containing amine oxidase; putative [Source:UniProtKB/TrEMBL
CADAFUAG00001420	283.4	-0.568155	0.130663	-4.34825	1.37227e-05	8.92388e-05	AFUA_4G04550	Afu4G04550	Xanthine-guanine phosphoribosyl transferase Xpt1; putative [Source:UniProtKB/TrEMBL
CADAFUAG00008082	544.534	-0.568005	0.107754	-5.27133	1.35442e-07	1.27718e-06	AFUA_4G07390	Afu4G07390	Endosomal cargo receptor (Erp5); putative [Source:UniProtKB/TrEMBL
CADAFUAG00007139	35.2016	-0.567534	0.277393	-2.04596	0.0407603	0.0937921	AFUA_1G09160	Afu1G09160	Putative uncharacterized protein [Source:UniProtKB/TrEMBL
CADAFUAG00009685	102.854	-0.567322	0.293825	-1.93081	0.0535062	0.116399	AFUA_7G06420	Afu7G06420	NADH-dependent flavin oxidoreductase; putative [Source:UniProtKB/TrEMBL
CADAFUAG00004268	690.729	-0.567292	0.170022	-3.33658	0.000848153	0.00347043	AFUA_2G15680	Afu2G15680	Transcription initiation factor IIA subunit 2 [Source:UniProtKB/TrEMBL
CADAFUAG00004706	1.78613	-0.566686	0.940269	-0.602685	0.546718	0.68654	AFUA_2G17380	Afu2G17380	Putative uncharacterized protein [Source:UniProtKB/TrEMBL
CADAFUAG00007849	203.6	-0.566598	0.15645	-3.62159	0.000292796	0.00138452	AFUA_4G09070	Afu4G09070	ATP binding L-PSP endoribonuclease family protein; putative [Source:UniProtKB/TrEMBL
CADAFUAG00001133	417.29	-0.566505	0.134844	-4.2012	2.65507e-05	0.000162958	AFUA_7G00460	Afu7G00460	Putative uncharacterized protein [Source:UniProtKB/TrEMBL
CADAFUAG00002363	265.308	-0.565532	0.155054	-3.64731	0.000264997	0.00126849	AFUA_6G09730	Afu6G09730	Cytochrome P450 oxidoreductase GliF [Source:UniProtKB/TrEMBL
CADAFUAG00003724	186.92	-0.56528	0.232121	-2.43528	0.0148801	0.040785	AFUA_2G04930	Afu2G04930	Putative uncharacterized protein [Source:UniProtKB/TrEMBL
CADAFUAG00000727	13.5415	-0.565266	0.409633	-1.37993	0.167607	0.28837	AFUA_6G01790	Afu6G01790	Putative uncharacterized protein [Source:UniProtKB/TrEMBL
CADAFUAG00007202	635.009	-0.564921	0.125043	-4.51782	6.24807e-06	4.34816e-05	AFUA_1G13510	Afu1G13510	C6 transcription factor FacB/Cat8 [Source:UniProtKB/TrEMBL
CADAFUAG00004869	1336.68	-0.564833	0.271068	-2.08373	0.0371845	0.0868383	AFUA_2G11180	Afu2G11180	Developmental regulator FlbA [Source:UniProtKB/TrEMBL
CADAFUAG00001242	220.528	-0.564605	0.184764	-3.05581	0.00224451	0.00813227	AFUA_7G00470	Afu7G00470	Putative uncharacterized protein [Source:UniProtKB/TrEMBL
CADAFUAG00008986	12.879	-0.564497	0.540475	-1.04445	0.296279	0.444441	AFUA_1G03280	Afu1G03280	MFS alpha-glucoside transporter; putative [Source:UniProtKB/TrEMBL
CADAFUAG00003813	64.0051	-0.564072	0.321829	-1.7527	0.0796527	0.160794	AFUA_2G01480	Afu2G01480	Nucleolar protein 16 [Source:UniProtKB/Swiss-Prot
CADAFUAG00003004	1891.18	-0.564015	0.0985894	-5.72085	1.05995e-08	1.1777e-07	AFUA_8G05480	Afu8G05480	CCCH zinc finger protein [Source:UniProtKB/TrEMBL
CADAFUAG00007803	34.1007	-0.563633	0.271207	-2.07824	0.0376872	0.0878013	AFUA_4G13920	Afu4G13920	Probable endopolygalacturonase A [Source:UniProtKB/Swiss-Prot
CADAFUAG00009102	184.79	-0.563199	0.134452	-4.18885	2.80371e-05	0.000170894	AFUA_1G02950	Afu1G02950	RNA binding protein [Source:UniProtKB/TrEMBL
CADAFUAG00004434	2.61694	-0.563062	0.896626	-0.627979	0.530018	0.672167	AFUA_2G14661	Afu2G14661	Hydrophobin; putative [Source:UniProtKB/TrEMBL
CADAFUAG00007785	26.7671	-0.562569	0.272581	-2.06386	0.039031	0.0904766	AFUA_4G07010	Afu4G07010	Hydrolase; TatD family protein; putative [Source:UniProtKB/TrEMBL
CADAFUAG00000714	19.9754	-0.562329	0.392753	-1.43176	0.152211	0.26842	AFUA_6G03030	Afu6G03030	Phenol monooxygenase; putative [Source:UniProtKB/TrEMBL
CADAFUAG00000414	100.737	-0.562007	0.160328	-3.50536	0.000455995	0.00202799	AFUA_6G02400	Afu6G02400	MFS drug efflux pump; putative [Source:UniProtKB/TrEMBL
CADAFUAG00008752	127.177	-0.561998	0.158515	-3.54539	0.00039204	0.00178103	AFUA_1G04920	Afu1G04920	Calmodulin-binding protein Sha1; putative [Source:UniProtKB/TrEMBL
CADAFUAG00007353	59.2607	-0.56071	0.21066	-2.66169	0.00777502	0.0235556	AFUA_1G11670	Afu1G11670	Small nuclear ribonucleoprotein Lsm8; putative [Source:UniProtKB/TrEMBL
CADAFUAG00000375	3491.59	-0.560659	0.307136	-1.82544	0.0679348	0.141064	AFUA_3G04070	Afu3G04070	BZIP transcription factor HacA [Source:UniProtKB/TrEMBL
CADAFUAG00001970	676.004	-0.5605	0.171982	-3.25905	0.00111785	0.00443942	AFUA_6G10900	Afu6G10900	UV-endonuclease UVE-1 [Source:UniProtKB/TrEMBL
CADAFUAG00008621	46361.6	-0.560115	0.203688	-2.74986	0.00596204	0.0187947	AFUA_1G05390	Afu1G05390	Mitochondrial ADP;ATP carrier protein (Ant); putative [Source:UniProtKB/TrEMBL
CADAFUAG00003376	419.318	-0.560009	0.256257	-2.18535	0.0288635	0.0708792	AFUA_2G03280	Afu2G03280	BZIP transcription factor; putative [Source:UniProtKB/TrEMBL
CADAFUAG00002015	7788.99	-0.559779	0.288662	-1.93922	0.0524742	0.114641	AFUA_6G13510	Afu6G13510	Putative uncharacterized protein [Source:UniProtKB/TrEMBL
CADAFUAG00004569	202.061	-0.559639	0.140148	-3.99319	6.51912e-05	0.000364876	AFUA_2G13720	Afu2G13720	DNA-directed RNA polymerase I and III subunit Rpc40; putative [Source:UniProtKB/TrEMBL
CADAFUAG00008220	142.36	-0.559561	0.194578	-2.87576	0.00403052	0.0134471	AFUA_4G06480	Afu4G06480	DDENN domain protein [Source:UniProtKB/TrEMBL
CADAFUAG00009550	1220.03	-0.559196	0.164022	-3.40927	0.000651375	0.00275933	AFUA_7G06590	Afu7G06590	Putative uncharacterized protein [Source:UniProtKB/TrEMBL
CADAFUAG00004591	2811.3	-0.558469	0.28174	-1.98221	0.0474554	0.105696	AFUA_2G15960	Afu2G15960	Cytosolic Fe-S cluster assembly factor nbp35 [Source:UniProtKB/Swiss-Prot
CADAFUAG00004229	993.392	-0.558259	0.135839	-4.1097	3.9617e-05	0.000232302	AFUA_2G14950	Afu2G14950	Exonuclease; putative [Source:UniProtKB/TrEMBL
CADAFUAG00007491	665.4	-0.558098	0.162589	-3.43257	0.000597881	0.00256627	AFUA_1G12740	Afu1G12740	Putative uncharacterized protein [Source:UniProtKB/TrEMBL
CADAFUAG00000230	138.645	-0.558053	0.180022	-3.09991	0.0019358	0.00714031	AFUA_3G00450	Afu3G00450	NmrA-like family protein [Source:UniProtKB/TrEMBL
CADAFUAG00002465	935.477	-0.557869	0.324631	-1.71847	0.0857109	0.170657	AFUA_4G01290	Afu4G01290
CADAFUAG00006613	95675.8	-0.557462	0.135196	-4.12334	3.7341e-05	0.000220821	AFUA_5G09230	Afu5G09230	Transaldolase [Source:UniProtKB/TrEMBL
CADAFUAG00006379	555.887	-0.556912	0.162065	-3.43636	0.000589586	0.00254189	AFUA_5G07300	Afu5G07300	Electron transfer flavoprotein; beta subunit; putative [Source:UniProtKB/TrEMBL
CADAFUAG00005225	342.334	-0.55623	0.20313	-2.7383	0.00617578	0.0193464	AFUA_3G08480	Afu3G08480	Sucrose transporter; putative [Source:UniProtKB/TrEMBL
CADAFUAG00004914	583.142	-0.555561	0.196918	-2.82128	0.00478327	0.0155684	AFUA_2G17480	Afu2G17480	Amino acid transporter; putative [Source:UniProtKB/TrEMBL
CADAFUAG00004286	8855.09	-0.555321	0.185427	-2.99482	0.00274607	0.00971518	AFUA_2G13000	Afu2G13000	Putative uncharacterized protein [Source:UniProtKB/TrEMBL
CADAFUAG00004000	257.402	-0.555277	0.162189	-3.42364	0.000617874	0.00263579	AFUA_2G16300	Afu2G16300	Dihydroxy acid dehydratase; putative [Source:UniProtKB/TrEMBL
CADAFUAG00008431	862.203	-0.55497	0.217178	-2.55537	0.0106074	0.0305104	AFUA_4G05880	Afu4G05880	U3 small nucleolar ribonucleoprotein protein Mpp10 [Source:UniProtKB/TrEMBL
CADAFUAG00005205	2914.11	-0.554787	0.130556	-4.24941	2.14332e-05	0.000134262	AFUA_3G08470	Afu3G08470	Glucose-6-phosphate 1-dehydrogenase [Source:UniProtKB/TrEMBL
CADAFUAG00006765	14749.4	-0.554575	0.215123	-2.57794	0.00993906	0.0289651	AFUA_5G10270	Afu5G10270	Heat shock protein Hsp20/Hsp26; putative [Source:UniProtKB/TrEMBL
CADAFUAG00001089	777.799	-0.554319	0.109271	-5.0729	3.91798e-07	3.43468e-06	AFUA_7G02100	Afu7G02100	Putative uncharacterized protein [Source:UniProtKB/TrEMBL
CADAFUAG00008209	552.812	-0.55407	0.106086	-5.22283	1.76214e-07	1.6441e-06	AFUA_4G13690	Afu4G13690	snoRNP protein (Gar1); putative [Source:UniProtKB/TrEMBL
CADAFUAG00008311	292.149	-0.553629	0.153834	-3.59887	0.000319601	0.00149598	AFUA_4G11900	Afu4G11900	Mitochondrial import inner membrane translocase subunit tim54 [Source:UniProtKB/Swiss-Prot
CADAFUAG00009355	0.920975	-0.553471	1.72215	-0.321383	0.74792	0.841973	AFUA_7G06730	Afu7G06730	FAD monooxygenase; putative [Source:UniProtKB/TrEMBL
CADAFUAG00002336	7823.24	-0.553172	0.0850647	-6.50296	7.87561e-11	1.17254e-09	AFUA_6G08360	Afu6G08360	Thiamine thiazole synthase [Source:UniProtKB/Swiss-Prot
CADAFUAG00003156	50.2946	-0.55316	0.401546	-1.37758	0.168334	0.289398	AFUA_8G07160	Afu8G07160	Putative uncharacterized protein [Source:UniProtKB/TrEMBL
CADAFUAG00000031	229.485	-0.553079	0.164803	-3.356	0.000790791	0.00326457	AFUA_3G00870	Afu3G00870	GNAT family N-acetyltransferase; putative [Source:UniProtKB/TrEMBL
CADAFUAG00002073	2981.43	-0.552653	0.118808	-4.65164	3.29309e-06	2.43463e-05	AFUA_6G12970	Afu6G12970	Nuclear distribution protein nudF [Source:UniProtKB/Swiss-Prot
CADAFUAG00000673	141.513	-0.552536	0.155889	-3.54443	0.000393467	0.00178668	AFUA_6G03510	Afu6G03510	Flavin containing polyamine oxidase; putative [Source:UniProtKB/TrEMBL
CADAFUAG00002963	112.433	-0.552237	0.238113	-2.31922	0.0203832	0.0531133	AFUA_8G06700	Afu8G06700	Annexin [Source:UniProtKB/TrEMBL
CADAFUAG00007228	534.209	-0.552094	0.149395	-3.69554	0.000219421	0.00106874	AFUA_1G10355	Afu1G10355	26 proteasome complex subunit Sem1; putative [Source:UniProtKB/TrEMBL
CADAFUAG00003847	26.0499	-0.551497	0.296523	-1.85988	0.0629024	0.132664	AFUA_2G05260	Afu2G05260	Salicylate hydroxylase; putative [Source:UniProtKB/TrEMBL
CADAFUAG00000679	59.2651	-0.551214	0.259613	-2.12322	0.0337358	0.0802702	AFUA_6G04690	Afu6G04690	Putative uncharacterized protein [Source:UniProtKB/TrEMBL
CADAFUAG00004260	287.928	-0.550655	0.112167	-4.90925	9.1425e-07	7.46047e-06	AFUA_2G07560	Afu2G07560	Mitochondrial inner membrane protease atp23 [Source:UniProtKB/Swiss-Prot
CADAFUAG00008539	738.167	-0.550202	0.107541	-5.11621	3.11735e-07	2.783e-06	AFUA_4G12330	Afu4G12330	Alkaline dihydroceramidase Ydc1; putative [Source:UniProtKB/TrEMBL
CADAFUAG00004357	22.5184	-0.549769	0.346093	-1.5885	0.112173	0.211511	AFUA_2G16190	Afu2G16190	Putative uncharacterized protein [Source:UniProtKB/TrEMBL
CADAFUAG00002554	62.4852	-0.549672	0.214809	-2.55889	0.0105007	0.0303096	AFUA_5G00530	Afu5G00530	Inulinase; putative [Source:UniProtKB/TrEMBL
CADAFUAG00008973	629.876	-0.549657	0.124971	-4.39827	1.09116e-05	7.2214e-05	AFUA_1G07430	Afu1G07430	Histone H2A,Z-specific chaperone chz1 [Source:UniProtKB/Swiss-Prot
CADAFUAG00003979	669.583	-0.549317	0.169603	-3.23883	0.00120021	0.00469745	AFUA_2G12260	Afu2G12260	Cytochrome c oxidase assembly protein Cox11; putative [Source:UniProtKB/TrEMBL
CADAFUAG00000068	5.48725	-0.549223	0.681192	-0.806267	0.420089	0.571283	AFUA_3G00580	Afu3G00580	Putative uncharacterized protein [Source:UniProtKB/TrEMBL
CADAFUAG00002809	444.264	-0.549012	0.322523	-1.70224	0.0887104	0.175507	AFUA_5G03600	Afu5G03600	Cytosolic Fe-S cluster assembly factor cfd1 [Source:UniProtKB/Swiss-Prot
CADAFUAG00003878	10923.6	-0.548892	0.281511	-1.94981	0.0511991	0.112361	AFUA_2G05450	Afu2G05450	NADH-ubiquinone oxidoreductase 64 kDa subunit; putative [Source:UniProtKB/TrEMBL
CADAFUAG00009590	663.435	-0.548269	0.134779	-4.06792	4.74339e-05	0.000272871	AFUA_7G04460	Afu7G04460	Rab geranylgeranyltransferase; beta subunit [Source:UniProtKB/TrEMBL
CADAFUAG00008767	1007.49	-0.548178	0.160762	-3.40988	0.000649925	0.00275498	AFUA_1G01770	Afu1G01770	Short chain oxidoreductase/dehydrogenase; putative [Source:UniProtKB/TrEMBL
CADAFUAG00003384	1739.23	-0.548066	0.17443	-3.14205	0.00167771	0.00629758	AFUA_2G04150	Afu2G04150	C6 transcription factor; putative [Source:UniProtKB/TrEMBL
CADAFUAG00002546	67.6645	-0.547882	0.21296	-2.5727	0.0100909	0.0293459	AFUA_5G02380	Afu5G02380	Putative uncharacterized protein [Source:UniProtKB/TrEMBL
CADAFUAG00007874	12891.9	-0.54763	0.160318	-3.41589	0.000635741	0.00270371	AFUA_4G12470	Afu4G12470	BZIP transcription factor CpcA [Source:UniProtKB/TrEMBL
CADAFUAG00001937	21.1556	-0.546874	0.343673	-1.59126	0.11155	0.210637	AFUA_6G09900	Afu6G09900	NAD binding Rossmann fold oxidoreductase; putative [Source:UniProtKB/TrEMBL
CADAFUAG00001973	3910.9	-0.546261	0.163813	-3.33465	0.000854065	0.00349021	AFUA_6G14200	Afu6G14200	Acetyl-CoA-acetyltransferase; putative [Source:UniProtKB/TrEMBL
CADAFUAG00008157	5097.12	-0.546234	0.22483	-2.42954	0.0151179	0.0413087	AFUA_4G12500	Afu4G12500	Putative uncharacterized protein [Source:UniProtKB/TrEMBL
CADAFUAG00003483	287.47	-0.545109	0.191772	-2.84249	0.00447632	0.0147122	AFUA_2G06200	Afu2G06200	Putative uncharacterized protein [Source:UniProtKB/TrEMBL
CADAFUAG00004540	20.3147	-0.544933	0.381424	-1.42868	0.153096	0.26954	AFUA_2G08240	Afu2G08240	C6 transcription factor; putative [Source:UniProtKB/TrEMBL
CADAFUAG00008140	120.312	-0.544697	0.165915	-3.283	0.00102709	0.00411599	AFUA_4G13140	Afu4G13140	Putative uncharacterized protein [Source:UniProtKB/TrEMBL
CADAFUAG00000260	25.6136	-0.544684	0.292953	-1.85929	0.062986	0.132773	AFUA_3G02216	Afu3G02216	Putative uncharacterized protein [Source:UniProtKB/TrEMBL
CADAFUAG00001878	3668.29	-0.544304	0.268657	-2.02602	0.042763	0.0972268	AFUA_6G06460	Afu6G06460	Fumarylacetoacetate hydrolase family protein [Source:UniProtKB/TrEMBL
CADAFUAG00006352	38.1839	-0.544238	0.289376	-1.88073	0.0600088	0.127604	AFUA_5G13830	Afu5G13830	Probable alpha-galactosidase A [Source:UniProtKB/Swiss-Prot
CADAFUAG00005495	42.4414	-0.544114	0.255199	-2.13211	0.0329975	0.0789107	AFUA_3G07660	Afu3G07660	Putative uncharacterized protein [Source:UniProtKB/TrEMBL
CADAFUAG00008771	2.19222	-0.543981	1.48218	-0.367014	0.713608	0.817547	AFUA_1G01710	Afu1G01710	Putative uncharacterized protein [Source:UniProtKB/TrEMBL
CADAFUAG00003372	99.7055	-0.543952	0.265549	-2.04841	0.0405202	0.0933058	AFUA_2G05000	Afu2G05000	Proline iminopeptidase [Source:UniProtKB/TrEMBL
CADAFUAG00008853	1746.58	-0.543894	0.0796216	-6.83099	8.43328e-12	1.40391e-10	AFUA_1G07530	Afu1G07530	Adenylate kinase [Source:UniProtKB/Swiss-Prot
CADAFUAG00002200	13.5811	-0.543563	0.433445	-1.25405	0.209822	0.342436	AFUA_6G11600	Afu6G11600	Endoglucanase; putative [Source:UniProtKB/TrEMBL
CADAFUAG00003664	73.3914	-0.543321	0.192751	-2.81877	0.00482085	0.015675	AFUA_2G01800	Afu2G01800	Hypothetical pathogenicity factor [Source:UniProtKB/TrEMBL
CADAFUAG00003763	2005.87	-0.54297	0.15833	-3.42935	0.00060504	0.00258899	AFUA_2G06310	Afu2G06310	ATP-dependent RNA helicase dbp3 [Source:UniProtKB/Swiss-Prot
CADAFUAG00003964	68.1762	-0.542962	0.260063	-2.08781	0.036815	0.086189	AFUA_2G10390	Afu2G10390	Putative uncharacterized protein [Source:UniProtKB/TrEMBL
CADAFUAG00009122	192.894	-0.542499	0.158844	-3.4153	0.000637117	0.00270719	AFUA_1G07640	Afu1G07640	YdiU domain protein [Source:UniProtKB/TrEMBL
CADAFUAG00008231	123.734	-0.542253	0.258663	-2.09637	0.0360497	0.0846967	AFUA_4G09240	Afu4G09240	Putative uncharacterized protein [Source:UniProtKB/TrEMBL
CADAFUAG00005413	47.0474	-0.542172	0.331905	-1.63352	0.102361	0.197177	AFUA_3G10040	Afu3G10040	Cyclin-like protein (Clg1); putative [Source:UniProtKB/TrEMBL
CADAFUAG00006035	405.806	-0.542087	0.125253	-4.32795	1.50501e-05	9.74812e-05	AFUA_5G11290	Afu5G11290	D-amino acid oxidase [Source:UniProtKB/TrEMBL
CADAFUAG00005712	225.595	-0.542086	0.131231	-4.13077	3.61549e-05	0.000215293	AFUA_3G08170	Afu3G08170	F-box and JmjC domain protein; putative [Source:UniProtKB/TrEMBL
CADAFUAG00002992	146.731	-0.541704	0.208409	-2.59923	0.00934326	0.0275341	AFUA_8G06810	Afu8G06810	Putative uncharacterized protein [Source:UniProtKB/TrEMBL
CADAFUAG00003116	83.0913	-0.541272	0.247415	-2.18771	0.0286909	0.0705622	AFUA_8G06590	Afu8G06590	Putative uncharacterized protein [Source:UniProtKB/TrEMBL
CADAFUAG00000558	53.3401	-0.541229	0.298366	-1.81398	0.0696811	0.143922	AFUA_6G03480	Afu6G03480	Nonribosomal peptide synthase; putative [Source:UniProtKB/TrEMBL
CADAFUAG00009200	29.6009	-0.541014	0.354383	-1.52664	0.126851	0.233569	AFUA_1G03180	Afu1G03180	DUF636 domain protein [Source:UniProtKB/TrEMBL
CADAFUAG00006043	66.4762	-0.540916	0.293878	-1.84061	0.0656781	0.137307	AFUA_5G13470	Afu5G13470	60S acidic ribosomal protein P0; putative [Source:UniProtKB/TrEMBL
CADAFUAG00009737	1.88576	-0.54078	1.54146	-0.350823	0.725721	0.826456	AFUA_8G07175	Afu8G07175
CADAFUAG00002482	526.205	-0.540721	0.143738	-3.76185	0.000168662	0.000852041	AFUA_4G01500	Afu4G01500	Lignostilbene dioxygenase; putative [Source:UniProtKB/TrEMBL
CADAFUAG00004188	229.658	-0.540681	0.144243	-3.74839	0.00017797	0.000893636	AFUA_2G15280	Afu2G15280	Putative uncharacterized protein [Source:UniProtKB/TrEMBL
CADAFUAG00000515	124.217	-0.540407	0.201968	-2.67571	0.00745715	0.0227339	AFUA_6G04420	Afu6G04420	Maintenance of mitochondrial morphology protein 1 [Source:UniProtKB/Swiss-Prot
CADAFUAG00007504	1148.96	-0.540382	0.147154	-3.67223	0.000240439	0.00116412	AFUA_1G14150	Afu1G14150	Putative uncharacterized protein [Source:UniProtKB/TrEMBL
CADAFUAG00002440	3589.74	-0.540362	0.163721	-3.30051	0.000965104	0.0038868	AFUA_4G01510	Afu4G01510	C6 transcription factor; putative [Source:UniProtKB/TrEMBL
CADAFUAG00003484	123.701	-0.540242	0.206	-2.62253	0.00872796	0.0259808	AFUA_2G00490	Afu2G00490	Glycosyl hydrolase; family 31 [Source:UniProtKB/TrEMBL
CADAFUAG00003264	66.2053	-0.539768	0.253143	-2.13227	0.032985	0.0789075	AFUA_8G05520	Afu8G05520	Aldehyde dehydrogenase family protein [Source:UniProtKB/TrEMBL
CADAFUAG00008945	277.79	-0.539744	0.112391	-4.80238	1.56793e-06	1.2303e-05	AFUA_1G03620	Afu1G03620	Vanillin dehydrogenase; putative [Source:UniProtKB/TrEMBL
CADAFUAG00004647	171.969	-0.539183	0.191242	-2.81938	0.00481168	0.0156504	AFUA_2G14350	Afu2G14350	AT DNA binding protein; putative [Source:UniProtKB/TrEMBL
CADAFUAG00005457	127.244	-0.539083	0.184499	-2.92188	0.00347929	0.011844	AFUA_3G12280	Afu3G12280	Recombination hotspot-binding protein (Translin); putative [Source:UniProtKB/TrEMBL
CADAFUAG00009867	6.27285	-0.539029	0.780385	-0.690721	0.489741	0.636702			U6 spliceosomal RNA [Source:RFAM
CADAFUAG00005305	1452.94	-0.539003	0.183154	-2.9429	0.00325157	0.0112298	AFUA_3G14590	Afu3G14590	Amine oxidase [Source:UniProtKB/TrEMBL
CADAFUAG00000471	304.662	-0.538947	0.144375	-3.73296	0.00018924	0.000942035	AFUA_6G02660	Afu6G02660	Putative uncharacterized protein [Source:UniProtKB/TrEMBL
CADAFUAG00007062	26.2437	-0.538599	0.351706	-1.53139	0.125672	0.231882	AFUA_1G13840	Afu1G13840	Integral membrane protein; Mpv17/PMP22 family; putative [Source:UniProtKB/TrEMBL
CADAFUAG00005137	10779.8	-0.538122	0.126708	-4.24694	2.16714e-05	0.000135579	AFUA_3G08010	Afu3G08010	C2H2 transcription factor (Ace1); putative [Source:UniProtKB/TrEMBL
CADAFUAG00003464	74.7618	-0.537927	0.227543	-2.36407	0.0180755	0.0480399	AFUA_2G02870	Afu2G02870	rRNA-processing protein efg1 [Source:UniProtKB/Swiss-Prot
CADAFUAG00006083	208.17	-0.537712	0.18811	-2.8585	0.00425644	0.0141184	AFUA_5G13580	Afu5G13580	3-ketosteroid-delta-1-dehydrogenase; putative [Source:UniProtKB/TrEMBL
CADAFUAG00000379	6.09738	-0.537644	0.814013	-0.660485	0.508943	0.653971	AFUA_3G01130	Afu3G01130	Cell wall protein; putative [Source:UniProtKB/TrEMBL
CADAFUAG00004384	4868.12	-0.537264	0.2451	-2.19202	0.0283778	0.0700048	AFUA_2G13690	Afu2G13690	Ubiquitin conjugating enzyme; putative [Source:UniProtKB/TrEMBL
CADAFUAG00000588	21.4278	-0.537244	0.37598	-1.42892	0.153028	0.269519	AFUA_6G03630	Afu6G03630	Very-long-chain acyl-CoA synthetase family protein (CefD1); putative [Source:UniProtKB/TrEMBL
CADAFUAG00008618	430.413	-0.537191	0.168579	-3.18657	0.00143969	0.005517	AFUA_1G04470	Afu1G04470	Mitochondrial import inner membrane translocase subunit tim10 [Source:UniProtKB/Swiss-Prot
CADAFUAG00001144	254.671	-0.536913	0.151216	-3.55063	0.000384307	0.00175492	AFUA_7G02490	Afu7G02490	Mitochondrial molecular chaperone (Atp12); putative [Source:UniProtKB/TrEMBL
CADAFUAG00000660	22.9884	-0.536417	0.400032	-1.34094	0.179941	0.304665	AFUA_6G04630	Afu6G04630	60S ribosomal subunit assembly/export protein loc1 [Source:UniProtKB/Swiss-Prot
CADAFUAG00001563	70.4969	-0.536186	0.227302	-2.35891	0.0183287	0.0485801	AFUA_6G10580	Afu6G10580	GPI anchored CFEM domain protein [Source:UniProtKB/TrEMBL
CADAFUAG00007197	712.617	-0.535979	0.20698	-2.58952	0.00961088	0.0281522	AFUA_1G12690	Afu1G12690	ABC multidrug transporter Mdr4 [Source:UniProtKB/TrEMBL
CADAFUAG00004954	726.049	-0.535897	0.154529	-3.46794	0.000524469	0.0022937	AFUA_3G06560	Afu3G06560	Lipoyl synthase; mitochondrial [Source:UniProtKB/Swiss-Prot
CADAFUAG00001425	333.531	-0.535266	0.253028	-2.11545	0.034392	0.0815816	AFUA_4G03620	Afu4G03620	Putative uncharacterized protein [Source:UniProtKB/TrEMBL
CADAFUAG00002502	14.0121	-0.535132	0.467381	-1.14496	0.252226	0.392719	AFUA_4G01322	Afu4G01322	C6 transcription factor; putative [Source:UniProtKB/TrEMBL
CADAFUAG00007516	59.2081	-0.535087	0.233668	-2.28994	0.0220245	0.0564074	AFUA_1G13210	Afu1G13210	Uridine permease Fui1; putative [Source:UniProtKB/TrEMBL
CADAFUAG00006740	514.428	-0.535013	0.113724	-4.7045	2.54483e-06	1.9179e-05	AFUA_5G13490	Afu5G13490	Mitochondrial ribosomal protein L43; putative [Source:UniProtKB/TrEMBL
CADAFUAG00008568	64.0453	-0.534573	0.363636	-1.47008	0.14154	0.253744	AFUA_4G08260	Afu4G08260	Putative uncharacterized protein [Source:UniProtKB/TrEMBL
CADAFUAG00008001	127.69	-0.53433	0.198183	-2.69615	0.0070147	0.0215608	AFUA_4G08560	Afu4G08560	F-box domain protein [Source:UniProtKB/TrEMBL
CADAFUAG00009245	117.387	-0.533967	0.163187	-3.27212	0.00106743	0.00426883	AFUA_1G06510	Afu1G06510	Putative uncharacterized protein [Source:UniProtKB/TrEMBL
CADAFUAG00007431	180.664	-0.533613	0.153983	-3.46541	0.000529421	0.00231223	AFUA_1G12140	Afu1G12140	Putative uncharacterized protein [Source:UniProtKB/TrEMBL
CADAFUAG00000340	7.63342	-0.532616	0.52175	-1.02083	0.307337	0.4568	AFUA_3G03820	Afu3G03820	MFS nicotinic acid transporter Tna1; putative [Source:UniProtKB/TrEMBL
CADAFUAG00005323	105.585	-0.532361	0.209259	-2.54402	0.0109583	0.0313344	AFUA_3G06980	Afu3G06980	Putative uncharacterized protein [Source:UniProtKB/TrEMBL
CADAFUAG00005097	523.233	-0.531947	0.106914	-4.97544	6.50992e-07	5.47487e-06	AFUA_3G13470	Afu3G13470	Sulfate transporter; putative [Source:UniProtKB/TrEMBL
CADAFUAG00002385	3.26009	-0.531933	0.866537	-0.613861	0.539307	0.680044	AFUA_4G01430	Afu4G01430	Putative uncharacterized protein [Source:UniProtKB/TrEMBL
CADAFUAG00008091	175.353	-0.531924	0.146081	-3.64129	0.000271276	0.00129472	AFUA_4G07250	Afu4G07250	37S ribosomal protein S25; mitochondrial [Source:UniProtKB/Swiss-Prot
CADAFUAG00005894	205.311	-0.531797	0.163978	-3.2431	0.00118236	0.00464627	AFUA_5G08240	Afu5G08240	MutT/nudix family protein [Source:UniProtKB/TrEMBL
CADAFUAG00003037	1273.66	-0.531793	1.00606	-0.528588	0.597091	0.728519	AFUA_8G06340	Afu8G06340	Putative uncharacterized protein [Source:UniProtKB/TrEMBL
CADAFUAG00006784	108.288	-0.5307	0.285107	-1.86141	0.0626864	0.132314	AFUA_5G10210	Afu5G10210	Putative uncharacterized protein [Source:UniProtKB/TrEMBL
CADAFUAG00003444	43.0803	-0.530589	0.21615	-2.45473	0.014099	0.0389405	AFUA_2G04535	Afu2G04535	Putative uncharacterized protein [Source:UniProtKB/TrEMBL
CADAFUAG00008922	758.629	-0.530335	0.104559	-5.07214	3.93376e-07	3.44541e-06	AFUA_1G05595	Afu1G05595	Capsule-associated protein CAP1; putative [Source:UniProtKB/TrEMBL
CADAFUAG00000411	180.228	-0.529573	0.17106	-3.09583	0.00196264	0.00722484	AFUA_6G03260	Afu6G03260	Aspartic endopeptidase (AP1); putative [Source:UniProtKB/TrEMBL
CADAFUAG00004107	448.268	-0.528699	0.115069	-4.59462	4.33535e-06	3.1337e-05	AFUA_2G10360	Afu2G10360	Kynureninase 1 [Source:UniProtKB/Swiss-Prot
CADAFUAG00003485	8.18823	-0.528538	0.712463	-0.741847	0.45818	0.607119	AFUA_2G00620	Afu2G00620	GDSL-like lipase/acylhydrolase domain protein [Source:UniProtKB/TrEMBL
CADAFUAG00003611	995.959	-0.528463	0.113443	-4.65839	3.18685e-06	2.36452e-05	AFUA_2G01630	Afu2G01630	MSF1 domain protein [Source:UniProtKB/TrEMBL
CADAFUAG00004442	389.367	-0.527783	0.13901	-3.79673	0.000146616	0.000753779	AFUA_2G14070	Afu2G14070	Putative uncharacterized protein [Source:UniProtKB/TrEMBL
CADAFUAG00001652	22.8207	-0.526415	0.512834	-1.02648	0.304664	0.454146	AFUA_6G14010	Afu6G14010	GPI anchored protein; putative [Source:UniProtKB/TrEMBL
CADAFUAG00005818	7482.69	-0.526313	0.151204	-3.48082	0.000499884	0.00219904	AFUA_3G14240	Afu3G14240	tRNA splicing protein (Spl1); putative. KLOPT NIET!! Is Nfs1 , wat sulfur afsplitst in de mito's!
CADAFUAG00000685	1.9779	-0.526216	1.03685	-0.507513	0.611795	0.740522	AFUA_6G03880	Afu6G03880	Putative uncharacterized protein [Source:UniProtKB/TrEMBL
CADAFUAG00006478	98.2519	-0.526009	0.273505	-1.92322	0.054453	0.117957	AFUA_5G13640	Afu5G13640	Thioredoxin; putative [Source:UniProtKB/TrEMBL
CADAFUAG00002258	310.436	-0.525502	0.191482	-2.7444	0.00606218	0.019024	AFUA_6G10530	Afu6G10530	Transcriptional elongation regulator Elc1/Elongin C; putative [Source:UniProtKB/TrEMBL
CADAFUAG00002085	398.597	-0.525248	0.150632	-3.48695	0.000488565	0.00215509	AFUA_6G13810	Afu6G13810	Putative uncharacterized protein [Source:UniProtKB/TrEMBL
CADAFUAG00007229	1118.7	-0.52507	0.195908	-2.68019	0.00735812	0.0224743	AFUA_1G12070	Afu1G12070	Glycine cleavage system H protein [Source:UniProtKB/TrEMBL
CADAFUAG00004764	1068.07	-0.524993	0.172859	-3.03711	0.00238861	0.00858485	AFUA_2G10450	Afu2G10450	Prephenate dehydrogenase [Source:UniProtKB/TrEMBL
CADAFUAG00000439	240.595	-0.52454	0.117294	-4.47202	7.74855e-06	5.29013e-05	AFUA_6G02730	Afu6G02730	MFS transporter; putative [Source:UniProtKB/TrEMBL
CADAFUAG00003733	950.005	-0.524118	0.149419	-3.5077	0.000451994	0.00201388	AFUA_2G05950	Afu2G05950	SnRNP and snoRNP protein (Snu13); putative [Source:UniProtKB/TrEMBL
CADAFUAG00003976	627.682	-0.523805	0.256494	-2.04217	0.0411343	0.0944961	AFUA_2G09640	Afu2G09640	RING finger domain protein; putative [Source:UniProtKB/TrEMBL
CADAFUAG00004495	36.7587	-0.523661	0.305613	-1.71348	0.0866248	0.172116	AFUA_2G13350	Afu2G13350	Mediator of RNA polymerase II transcription subunit 21 [Source:UniProtKB/Swiss-Prot
CADAFUAG00002711	65.505	-0.522826	0.215896	-2.42166	0.0154498	0.0419796	AFUA_5G02940	Afu5G02940	Choline transport protein Ctr; putative [Source:UniProtKB/TrEMBL
CADAFUAG00002396	0.688424	-0.522304	1.99466	-0.261851	0.793436	0.87554	AFUA_4G00650	Afu4G00650	Putative uncharacterized protein [Source:UniProtKB/TrEMBL
CADAFUAG00006261	141.339	-0.522187	0.138114	-3.78085	0.000156292	0.000797204	AFUA_5G12630	Afu5G12630	Putative uncharacterized protein [Source:UniProtKB/TrEMBL
CADAFUAG00008356	1.19317	-0.522095	1.28564	-0.406099	0.68467	0.79674	AFUA_4G14770	Afu4G14770	Protostadienol synthase A [Source:UniProtKB/Swiss-Prot
CADAFUAG00000341	10.6806	-0.52154	0.487125	-1.07065	0.284327	0.431047	AFUA_3G03300	Afu3G03300	FAD-binding oxidoreductase; putative [Source:UniProtKB/TrEMBL
CADAFUAG00003827	105.557	-0.521324	0.174509	-2.98738	0.00281379	0.00990097	AFUA_2G02140	Afu2G02140	CUE domain protein; putative [Source:UniProtKB/TrEMBL
CADAFUAG00003045	132.647	-0.521095	0.180388	-2.88875	0.00386775	0.0129934	AFUA_8G04790	Afu8G04790	Ribosome biogenesis protein; putative [Source:UniProtKB/TrEMBL
CADAFUAG00003236	98.5747	-0.520848	0.314927	-1.65387	0.0981542	0.19046	AFUA_8G04290	Afu8G04290	C2H2 finger domain protein; putative [Source:UniProtKB/TrEMBL
CADAFUAG00003771	93.652	-0.520674	0.214945	-2.42236	0.0154203	0.041911	AFUA_2G04590	Afu2G04590	Alcohol dehydrogenase; putative [Source:UniProtKB/TrEMBL
CADAFUAG00009112	101.893	-0.520549	0.179888	-2.89374	0.0038068	0.0128239	AFUA_1G02100	Afu1G02100	Putative uncharacterized protein [Source:UniProtKB/TrEMBL
CADAFUAG00009347	478.516	-0.520499	0.17712	-2.93868	0.00329609	0.0113513	AFUA_7G05735	Afu7G05735	Protein transport protein BOS1 [Source:UniProtKB/TrEMBL
CADAFUAG00001897	201.605	-0.520216	0.154929	-3.35777	0.000785747	0.00325204	AFUA_6G13150	Afu6G13150	Putative uncharacterized protein [Source:UniProtKB/TrEMBL
CADAFUAG00000613	3808.47	-0.520051	0.137382	-3.78544	0.000153434	0.000785098	AFUA_6G01940	Afu6G01940	Dienelactone hydrolase family protein [Source:UniProtKB/TrEMBL
CADAFUAG00002263	205.589	-0.519745	0.613581	-0.84707	0.396956	0.549276	AFUA_6G09960	Afu6G09960	Putative uncharacterized protein [Source:UniProtKB/TrEMBL
CADAFUAG00001191	20.5609	-0.51934	0.31014	-1.67453	0.0940262	0.183854	AFUA_7G00300	Afu7G00300	Squalene-hopene-cyclase; putative [Source:UniProtKB/TrEMBL
CADAFUAG00003059	577.993	-0.518506	0.139865	-3.7072	0.000209567	0.00102589	AFUA_8G03910	Afu8G03910	Putative uncharacterized protein [Source:UniProtKB/TrEMBL
CADAFUAG00004685	148.154	-0.518495	0.202583	-2.55942	0.0104847	0.0302828	AFUA_2G17050	Afu2G17050	Nuclear export protein Noc3 [Source:UniProtKB/TrEMBL
CADAFUAG00003707	16.1938	-0.518491	0.356555	-1.45417	0.1459	0.259454	AFUA_2G05280	Afu2G05280	F-box domain protein [Source:UniProtKB/TrEMBL
CADAFUAG00002137	686.234	-0.518378	0.252224	-2.05523	0.0398572	0.0919971	AFUA_6G07330	Afu6G07330	Methionine aminopeptidase [Source:UniProtKB/TrEMBL
CADAFUAG00009300	378.267	-0.518059	0.228544	-2.26678	0.0234037	0.0594074	AFUA_1G02320	Afu1G02320	Putative uncharacterized protein [Source:UniProtKB/TrEMBL
CADAFUAG00007401	2245.07	-0.517214	0.164632	-3.14163	0.00168009	0.00630406	AFUA_1G08870	Afu1G08870	Putative uncharacterized protein [Source:UniProtKB/TrEMBL
CADAFUAG00006837	98.2314	-0.517199	0.335948	-1.53952	0.123677	0.22907	AFUA_1G16920	Afu1G16920	Probable exo-1;4-beta-xylosidase xlnD [Source:UniProtKB/Swiss-Prot
CADAFUAG00000431	144.945	-0.516393	0.27279	-1.89301	0.0583568	0.124472	AFUA_6G04410	Afu6G04410	DUF1183 domain protein [Source:UniProtKB/TrEMBL
CADAFUAG00007732	538.091	-0.515783	0.104027	-4.95819	7.1153e-07	5.95424e-06	AFUA_4G06000	Afu4G06000	50S ribosomal protein L3 [Source:UniProtKB/TrEMBL
CADAFUAG00006433	188.182	-0.515616	0.287016	-1.79647	0.0724197	0.148631	AFUA_5G10200	Afu5G10200	Putative uncharacterized protein [Source:UniProtKB/TrEMBL
CADAFUAG00003522	608.972	-0.515068	0.263451	-1.95508	0.0505739	0.111412	AFUA_2G01950	Afu2G01950	Monooxygenase; putative [Source:UniProtKB/TrEMBL
CADAFUAG00001683	158.643	-0.514556	0.135537	-3.79643	0.000146793	0.000754294	AFUA_6G11210	Afu6G11210	3-oxoacyl-(Acyl-carrier-protein) reductase [Source:UniProtKB/TrEMBL
CADAFUAG00002007	91788.2	-0.514437	0.161913	-3.17724	0.00148682	0.00566857	AFUA_6G14120	Afu6G14120	Putative uncharacterized protein [Source:UniProtKB/TrEMBL
CADAFUAG00005089	378.051	-0.514322	0.155827	-3.3006	0.00096477	0.0038868	AFUA_3G12750	Afu3G12750	Crossover junction endonuclease mus81 [Source:UniProtKB/Swiss-Prot
CADAFUAG00006105	124.886	-0.514167	0.162598	-3.1622	0.00156584	0.00593888	AFUA_5G12120	Afu5G12120	Autophagy protein 16 [Source:UniProtKB/Swiss-Prot
CADAFUAG00000402	62.515	-0.514135	0.199584	-2.57603	0.00999417	0.0291082	AFUA_6G02360	Afu6G02360	Putative uncharacterized protein [Source:UniProtKB/TrEMBL
CADAFUAG00002154	11099	-0.514107	0.16618	-3.09368	0.0019769	0.0072718	AFUA_6G12730	Afu6G12730	Integral membrane protein [Source:UniProtKB/TrEMBL
CADAFUAG00007741	153.775	-0.513864	0.18775	-2.73696	0.00620107	0.0193848	AFUA_4G11820	Afu4G11820	ATP binding protein; putative [Source:UniProtKB/TrEMBL
CADAFUAG00007940	390.196	-0.513634	0.13252	-3.8759	0.000106229	0.000563735	AFUA_4G13180	Afu4G13180	TPR repeat protein [Source:UniProtKB/TrEMBL
CADAFUAG00001111	5.14448	-0.513131	0.599126	-0.856465	0.391741	0.543916	AFUA_7G00870	Afu7G00870	RNA exonuclease; putative [Source:UniProtKB/TrEMBL
[truncated: 7,899 more rows]

## Sheet: Base Expression V181(R) vs V147
	baseMean	log2FoldChange	lfcSE	stat	pvalue	padj
CADAFUAG00001803	2373.07	-12.7573	1.00241	-12.7266	4.20545e-37	4.75412e-35	AFUA_6G09315	Afu6G09315	Putative uncharacterized protein [Source:UniProtKB/TrEMBL
CADAFUAG00003275	4669.61	-12.6325	0.487573	-25.909	5.27925e-148	1.71083e-144	AFUA_8G06490	Afu8G06490	Putative uncharacterized protein [Source:UniProtKB/TrEMBL
CADAFUAG00000376	1330.19	-12.5805	1.02257	-12.3028	8.74766e-35	8.59038e-33	AFUA_3G02520	Afu3G02520	MFS multidrug transporter; putative [Source:UniProtKB/TrEMBL
CADAFUAG00002034	5668.12	-12.5407	0.858435	-14.6089	2.46613e-48	4.52373e-46	AFUA_6G09310	Afu6G09310	Class V chitinase; putative [Source:UniProtKB/TrEMBL
CADAFUAG00002338	541.987	-12.5258	1.02466	-12.2243	2.30507e-34	2.19705e-32	AFUA_6G14620	Afu6G14620	Probable alpha-N-arabinofuranosidase B [Source:UniProtKB/Swiss-Prot
CADAFUAG00001772	2079.6	-12.3444	0.843135	-14.6411	1.53565e-48	2.87107e-46	AFUA_6G09320	Afu6G09320	LysM domain protein; putative [Source:UniProtKB/TrEMBL
CADAFUAG00002117	3256.9	-11.9918	0.730828	-16.4085	1.66205e-60	5.21242e-58	AFUA_6G09305	Afu6G09305	Putative uncharacterized protein [Source:UniProtKB/TrEMBL
CADAFUAG00001651	750.7	-11.8942	1.01484	-11.7203	1.00267e-31	8.26095e-30	AFUA_6G09450	Afu6G09450	LipA and NB-ARC domain protein [Source:UniProtKB/TrEMBL
CADAFUAG00002237	574.719	-11.4489	1.0319	-11.095	1.32699e-28	9.28131e-27	AFUA_6G09300	Afu6G09300	C2H2 finger domain protein; putative [Source:UniProtKB/TrEMBL
CADAFUAG00001836	637.923	-11.2693	0.979973	-11.4996	1.32519e-30	1.01445e-28	AFUA_6G09335	Afu6G09335	SRF-type transcription factor family protein [Source:UniProtKB/TrEMBL
CADAFUAG00001587	859.929	-11.1739	0.907002	-12.3196	7.10896e-35	7.05238e-33	AFUA_6G09390	Afu6G09390	Putative uncharacterized protein [Source:UniProtKB/TrEMBL
CADAFUAG00000188	108.009	-10.7367	1.03136	-10.4103	2.22543e-25	1.2293e-23	AFUA_3G03760	Afu3G03760	Putative uncharacterized protein [Source:UniProtKB/TrEMBL
CADAFUAG00002002	486.53	-10.3994	0.8355	-12.447	1.45241e-35	1.51832e-33	AFUA_6G09440	Afu6G09440	Tetrahydrofolylpolyglutamate synthase; putative [Source:UniProtKB/TrEMBL
CADAFUAG00009599	54.0727	-9.94419	1.04163	-9.54677	1.33809e-21	5.60729e-20	AFUA_7G06940	Afu7G06940	Fungal specific transcription factor; putative [Source:UniProtKB/TrEMBL
CADAFUAG00001666	184.24	-9.89809	1.00894	-9.81041	1.01556e-22	4.70157e-21	AFUA_6G09380	Afu6G09380	Putative uncharacterized protein [Source:UniProtKB/TrEMBL
CADAFUAG00000237	47.463	-9.75825	1.04046	-9.37878	6.67385e-21	2.65915e-19	AFUA_3G02480	Afu3G02480	C6 transcription factor; putative [Source:UniProtKB/TrEMBL
CADAFUAG00002119	75.2517	-9.63051	1.03972	-9.26261	1.99496e-20	7.66599e-19	AFUA_6G09350	Afu6G09350	C6 finger domain protein; putative [Source:UniProtKB/TrEMBL
CADAFUAG00002035	71.1041	-9.55507	1.03326	-9.24751	2.29782e-20	8.72632e-19	AFUA_6G09410	Afu6G09410	Putative uncharacterized protein [Source:UniProtKB/TrEMBL
CADAFUAG00002118	106.461	-9.3168	1.0308	-9.03839	1.58992e-19	5.46192e-18	AFUA_6G09395	Afu6G09395	Putative uncharacterized protein [Source:UniProtKB/TrEMBL
CADAFUAG00002712	32.5301	-9.196	1.05259	-8.73654	2.4035e-18	7.63623e-17	AFUA_5G01005	Afu5G01005	Putative uncharacterized protein [Source:UniProtKB/TrEMBL
CADAFUAG00002030	52.3528	-9.01328	1.03841	-8.67988	3.96199e-18	1.23457e-16	AFUA_6G14630	Afu6G14630	Putative uncharacterized protein [Source:UniProtKB/TrEMBL
CADAFUAG00002224	251.343	-8.93238	0.732785	-12.1896	3.52994e-34	3.33185e-32	AFUA_6G09400	Afu6G09400	Putative uncharacterized protein [Source:UniProtKB/TrEMBL
CADAFUAG00000138	21.3718	-8.59005	1.05955	-8.10729	5.17617e-16	1.37119e-14	AFUA_3G02500	Afu3G02500	Protein kinase; putative [Source:UniProtKB/TrEMBL
CADAFUAG00002013	38.0716	-8.414	1.065	-7.90045	2.77889e-15	6.83959e-14	AFUA_6G09353	Afu6G09353	Putative uncharacterized protein [Source:UniProtKB/TrEMBL
CADAFUAG00009527	28.7283	-8.31271	1.05799	-7.85709	3.93172e-15	9.5085e-14	AFUA_7G06970	Afu7G06970
CADAFUAG00001578	32.8494	-8.29673	1.04366	-7.94966	1.87018e-15	4.66203e-14	AFUA_6G09370	Afu6G09370	RING finger protein [Source:UniProtKB/TrEMBL
CADAFUAG00001992	16.2116	-7.95561	1.07329	-7.41236	1.24067e-13	2.53994e-12	AFUA_6G13820	Afu6G13820	Putative uncharacterized protein [Source:UniProtKB/TrEMBL
CADAFUAG00009572	13.3653	-7.9239	1.07802	-7.35042	1.97588e-13	3.9203e-12	AFUA_7G06981	Afu7G06981	Putative uncharacterized protein [Source:UniProtKB/TrEMBL
CADAFUAG00002463	1008.36	-7.80733	0.377339	-20.6905	4.21883e-95	3.15504e-92	AFUA_4G00450	Afu4G00450	Putative uncharacterized protein [Source:UniProtKB/TrEMBL
CADAFUAG00000262	13.6264	-7.6555	1.07425	-7.12636	1.03058e-12	1.8976e-11	AFUA_3G02550	Afu3G02550	Putative uncharacterized protein [Source:UniProtKB/TrEMBL
CADAFUAG00002140	17.1709	-7.63771	1.07787	-7.08593	1.3811e-12	2.51915e-11	AFUA_6G09420	Afu6G09420	Putative uncharacterized protein [Source:UniProtKB/TrEMBL
CADAFUAG00000215	9.67962	-7.46053	1.09215	-6.83103	8.43051e-12	1.41313e-10	AFUA_3G02450	Afu3G02450	Putative uncharacterized protein [Source:UniProtKB/TrEMBL
CADAFUAG00009629	8.91569	-7.2274	1.13157	-6.38704	1.69132e-10	2.44688e-09	AFUA_7G06950	Afu7G06950	Oxidoreductase; putative [Source:UniProtKB/TrEMBL
CADAFUAG00001663	8.22471	-7.01931	1.11123	-6.31673	2.67157e-10	3.72641e-09	AFUA_6G14640	Afu6G14640	MFS toxin transporter; putative [Source:UniProtKB/TrEMBL
CADAFUAG00002322	11.3032	-6.89292	1.0781	-6.39356	1.62065e-10	2.35461e-09	AFUA_6G09430	Afu6G09430	Putative uncharacterized protein [Source:UniProtKB/TrEMBL
CADAFUAG00001097	661.158	-6.84491	0.258406	-26.489	1.29634e-154	6.30149e-151	AFUA_7G00805	Afu7G00805	Putative uncharacterized protein [Source:UniProtKB/TrEMBL
CADAFUAG00009437	23.8913	-6.71645	1.06412	-6.31173	2.75925e-10	3.83221e-09	AFUA_7G08250	Afu7G08250	C6 finger domain protein; putative [Source:UniProtKB/TrEMBL
CADAFUAG00009380	4.81326	-6.41338	1.19578	-5.36332	8.17044e-08	7.82591e-07	AFUA_7G06960	Afu7G06960	Monooxygenase; putative [Source:UniProtKB/TrEMBL
CADAFUAG00001581	325.583	-6.38237	0.460309	-13.8654	1.02643e-43	1.58396e-41	AFUA_6G09340	Afu6G09340	Putative uncharacterized protein [Source:UniProtKB/TrEMBL
CADAFUAG00001173	55.4176	-6.3772	1.25423	-5.08456	3.68478e-07	3.1507e-06	AFUA_7G00170	Afu7G00170	Dimethylallyl tryptophan synthase GliD1 [Source:UniProtKB/TrEMBL
CADAFUAG00002851	7726.46	-6.14812	0.429604	-14.3111	1.86466e-46	3.12555e-44	AFUA_5G01620	Afu5G01620	Extracellular proline-rich protein [Source:UniProtKB/TrEMBL
CADAFUAG00000224	4.14836	-6.14734	1.20312	-5.1095	3.23009e-07	2.79634e-06	AFUA_3G02460	Afu3G02460	Serine protein kinase; putative [Source:UniProtKB/TrEMBL
CADAFUAG00007631	85.4377	-6.00032	0.53094	-11.3013	1.29274e-29	9.30965e-28	AFUA_1G16930	Afu1G16930	Phosphatidylserine decarboxylase; putative [Source:UniProtKB/TrEMBL
CADAFUAG00003293	82.206	-5.84682	0.426134	-13.7206	7.64154e-43	1.14294e-40	AFUA_2G00550	Afu2G00550	Putative uncharacterized protein [Source:UniProtKB/TrEMBL
CADAFUAG00001686	4.60265	-5.75255	1.14383	-5.02921	4.92501e-07	4.12411e-06	AFUA_6G09360	Afu6G09360	Proline-glycine rich protein; putative [Source:UniProtKB/TrEMBL
CADAFUAG00001043	27.0974	-5.56006	0.586459	-9.48073	2.52517e-21	1.0315e-19	AFUA_7G00600	Afu7G00600	Hydrolase; CocE/NonD family; putative [Source:UniProtKB/TrEMBL
CADAFUAG00009632	2.00321	-5.2062	1.39044	-3.74428	0.000180914	0.000858645	AFUA_7G07000	Afu7G07000	Fumarylacetoacetate hydrolase family protein [Source:UniProtKB/TrEMBL
CADAFUAG00001228	1.94242	-5.1561	1.36973	-3.76433	0.000166997	0.000800172	AFUA_7G00610	Afu7G00610	Putative uncharacterized protein [Source:UniProtKB/TrEMBL
CADAFUAG00008439	29.1113	-5.15346	0.548867	-9.38927	6.04183e-21	2.42722e-19
CADAFUAG00000074	47.6348	-4.89656	0.398849	-12.2767	1.20783e-34	1.17425e-32	AFUA_3G01420	Afu3G01420	DUF341 family oxidoreductase; putative [Source:UniProtKB/TrEMBL
CADAFUAG00001182	1526.52	-4.86471	0.403101	-12.0682	1.55485e-33	1.38681e-31	AFUA_7G00370	Afu7G00370	Putative uncharacterized protein [Source:UniProtKB/TrEMBL
CADAFUAG00003711	426.377	-4.75852	0.998666	-4.76488	1.88966e-06	1.41535e-05	AFUA_2G04890	Afu2G04890	TAM domain methyltransferase; putative [Source:UniProtKB/TrEMBL
CADAFUAG00003165	108.728	-4.63531	0.258966	-17.8993	1.19494e-71	5.80862e-69	AFUA_8G06050	Afu8G06050	Salicylate hydroxylase; putative [Source:UniProtKB/TrEMBL
CADAFUAG00001186	270.6	-4.63028	0.323025	-14.3341	1.33901e-46	2.28384e-44	AFUA_7G00130	Afu7G00130	C6 transcription factor; putative [Source:UniProtKB/TrEMBL
CADAFUAG00002554	62.4852	-4.5171	0.364109	-12.4059	2.42694e-35	2.48365e-33	AFUA_5G00530	Afu5G00530	Inulinase; putative [Source:UniProtKB/TrEMBL
CADAFUAG00002964	822.111	-4.46264	0.28967	-15.406	1.49273e-53	3.5396e-51	AFUA_8G05970	Afu8G05970	Toxin biosynthesis protein (Tri7); putative [Source:UniProtKB/TrEMBL
CADAFUAG00001060	24.6437	-4.32199	0.475469	-9.08995	9.90819e-20	3.55452e-18	AFUA_7G00290	Afu7G00290	Cytochrome P450 monooxygenase; putative [Source:UniProtKB/TrEMBL
CADAFUAG00006704	497.932	-4.30797	0.685194	-6.28722	3.23209e-10	4.45708e-09	AFUA_5G10070	Afu5G10070	3-hydroxyacyl-CoA dehydrogenase; putative [Source:UniProtKB/TrEMBL
CADAFUAG00001165	19.1282	-4.28225	0.9252	-4.62846	3.68396e-06	2.60476e-05	AFUA_7G00180	Afu7G00180	NAD dependent epimerase/dehydratase; putative [Source:UniProtKB/TrEMBL
CADAFUAG00009642	9.00815	-4.20429	1.00737	-4.17351	2.9994e-05	0.000174195	AFUA_7G08630	Afu7G08630	Putative uncharacterized protein [Source:UniProtKB/TrEMBL
CADAFUAG00000170	22.2223	-4.19392	0.60352	-6.9491	3.67634e-12	6.42831e-11	AFUA_3G03490	Afu3G03490	O-methyltransferase; putative [Source:UniProtKB/TrEMBL
CADAFUAG00001129	158.872	-4.12808	0.276833	-14.9118	2.76203e-50	5.48009e-48	AFUA_7G01040	Afu7G01040	Cytidine deaminase; putative [Source:UniProtKB/TrEMBL
CADAFUAG00002866	289.022	-4.07984	0.19297	-21.1424	3.24264e-99	2.62708e-96	AFUA_5G01610	Afu5G01610	Putative uncharacterized protein [Source:UniProtKB/TrEMBL
CADAFUAG00009881	1.64629	-4.07822	3.70668	-1.10024	0.27123	0.40674			8s_rRNA [Source:RNAMMER
CADAFUAG00003286	17.7247	-4.06638	0.505174	-8.04946	8.31605e-16	2.16752e-14	AFUA_8G06480	Afu8G06480	Rhamnogalacturonan acetylesterase superfamily protein [Source:UniProtKB/TrEMBL
CADAFUAG00003651	1518.58	-4.05501	0.233751	-17.3475	2.05934e-67	7.70034e-65	AFUA_2G00570	Afu2G00570	GNAT family acetyltransferase; putative [Source:UniProtKB/TrEMBL
CADAFUAG00002512	4.06593	-4.01278	1.21509	-3.30247	0.000958372	0.00374188	AFUA_4G00810	Afu4G00810	Putative uncharacterized protein [Source:UniProtKB/TrEMBL
CADAFUAG00004362	338.017	-4.00684	0.837842	-4.78233	1.73272e-06	1.314e-05	AFUA_2G15860	Afu2G15860	TAM domain methyltransferase; putative [Source:UniProtKB/TrEMBL
CADAFUAG00007056	99.4293	-3.97877	0.248032	-16.0414	6.56828e-58	1.82448e-55	AFUA_1G16440	Afu1G16440	ABC ATPase; putative [Source:UniProtKB/TrEMBL
CADAFUAG00009825	1.13564	-3.92912	1.71687	-2.28853	0.0221065	0.0551217	AFUA_1G14235	Afu1G14235
CADAFUAG00001372	22.6662	-3.88341	0.470932	-8.24623	1.6347e-16	4.59321e-15	AFUA_4G02950	Afu4G02950	Nucleotidase; putative [Source:UniProtKB/TrEMBL
CADAFUAG00001486	58.7783	-3.87926	0.288789	-13.4328	3.88337e-41	5.39345e-39	AFUA_4G02960	Afu4G02960	UDP-sugar hydrolase; putative [Source:UniProtKB/TrEMBL
CADAFUAG00003833	291.028	-3.84706	0.253057	-15.2023	3.41293e-52	7.37345e-50	AFUA_2G00940	Afu2G00940	Putative uncharacterized protein [Source:UniProtKB/TrEMBL
CADAFUAG00000189	268.906	-3.77289	0.355184	-10.6224	2.34533e-26	1.39033e-24	AFUA_3G03010	Afu3G03010	Phosphate-repressible Na+/phosphate cotransporter Pho89; putative [Source:UniProtKB/TrEMBL
CADAFUAG00009636	4.00286	-3.76353	0.979325	-3.84298	0.00012155	0.000609444	AFUA_7G06740	Afu7G06740	Endoglucanase; putative [Source:UniProtKB/TrEMBL
CADAFUAG00000713	113.88	-3.74384	0.544391	-6.87712	6.10754e-12	1.03989e-10	AFUA_6G04280	Afu6G04280	Integral membrane protein [Source:UniProtKB/TrEMBL
CADAFUAG00009712	2.11973	-3.74008	1.41697	-2.63949	0.00830319	0.0241038	AFUA_8G02495	Afu8G02495
CADAFUAG00004153	285.321	-3.66885	0.593796	-6.17864	6.46572e-10	8.564e-09	AFUA_2G12680	Afu2G12680	Putative uncharacterized protein [Source:UniProtKB/TrEMBL
CADAFUAG00001085	26.3833	-3.65745	1.21288	-3.01551	0.00256545	0.00873601	AFUA_7G00160	Afu7G00160	Polyketide synthase; putative [Source:UniProtKB/TrEMBL
CADAFUAG00003209	110.727	-3.63031	0.342065	-10.6129	2.59429e-26	1.52859e-24	AFUA_8G06760	Afu8G06760	MFS transporter; putative [Source:UniProtKB/TrEMBL
CADAFUAG00000570	358.963	-3.62832	0.279371	-12.9874	1.44154e-38	1.84403e-36	AFUA_6G03350	Afu6G03350	GNAT family N-acetyltransferase; putative [Source:UniProtKB/TrEMBL
CADAFUAG00002638	20806.4	-3.61104	0.374867	-9.63285	5.80927e-22	2.53263e-20	AFUA_5G01030	Afu5G01030	Glyceraldehyde-3-phosphate dehydrogenase [Source:UniProtKB/TrEMBL
CADAFUAG00001378	1.27876	-3.56475	1.39003	-2.5645	0.0103324	0.0290995	AFUA_4G02700	Afu4G02700	Neutral protease 2 homolog AFUB_070680 [Source:UniProtKB/Swiss-Prot
CADAFUAG00000874	72.4745	-3.55163	0.464522	-7.64579	2.07673e-14	4.63074e-13	AFUA_8G01770	Afu8G01770	Putative uncharacterized protein [Source:UniProtKB/TrEMBL
CADAFUAG00000337	0.619772	-3.50808	2.6282	-1.33479	0.181946	0.297942	AFUA_3G02470	Afu3G02470	Amidase family protein [Source:UniProtKB/TrEMBL
CADAFUAG00003360	531.526	-3.45285	0.292571	-11.8017	3.8234e-32	3.26063e-30	AFUA_2G00580	Afu2G00580	Putative uncharacterized protein [Source:UniProtKB/TrEMBL
CADAFUAG00002899	142.49	-3.446	0.327796	-10.5126	7.55663e-26	4.27125e-24	AFUA_5G01600	Afu5G01600	PHP domain protein [Source:UniProtKB/TrEMBL
CADAFUAG00003481	5395.84	-3.39264	0.145802	-23.2688	9.17286e-120	1.48631e-116	AFUA_2G05910	Afu2G05910	Hexokinase Kxk; putative [Source:UniProtKB/TrEMBL
CADAFUAG00000249	52.2229	-3.37513	0.266998	-12.641	1.25442e-36	1.38585e-34	AFUA_3G01240	Afu3G01240	Putative uncharacterized protein [Source:UniProtKB/TrEMBL
CADAFUAG00003269	8.4335	-3.33954	0.816342	-4.09086	4.29781e-05	0.000241801	AFUA_8G06060	Afu8G06060	Putative uncharacterized protein [Source:UniProtKB/TrEMBL
CADAFUAG00002451	6.85478	-3.29764	0.877313	-3.75879	0.000170735	0.000815268	AFUA_4G00470	Afu4G00470	MFS multidrug transporter; putative [Source:UniProtKB/TrEMBL
CADAFUAG00001980	1.33873	-3.27605	1.47375	-2.22294	0.0262196	0.0632837	AFUA_6G10170	Afu6G10170	Spherulin 4 family protein [Source:UniProtKB/TrEMBL
CADAFUAG00006726	392.351	-3.26654	0.604881	-5.40031	6.65258e-08	6.44187e-07	AFUA_5G10060	Afu5G10060	Cytochrome b5 reductase; putative [Source:UniProtKB/TrEMBL
CADAFUAG00007262	68.5008	-3.2501	0.293532	-11.0724	1.70825e-28	1.18626e-26	AFUA_1G17740	Afu1G17740	Polyketide synthase; putative [Source:UniProtKB/TrEMBL
CADAFUAG00003509	17.3097	-3.23178	0.485887	-6.65131	2.905e-11	4.59974e-10	AFUA_2G00560	Afu2G00560	Putative uncharacterized protein [Source:UniProtKB/TrEMBL
CADAFUAG00004138	2773.18	-3.21545	0.182767	-17.5932	2.7782e-69	1.08039e-66	AFUA_2G12630	Afu2G12630	Allergen Asp f 15 [Source:UniProtKB/Swiss-Prot
CADAFUAG00002853	1058.68	-3.21294	0.268314	-11.9746	4.82962e-33	4.19228e-31	AFUA_5G02880	Afu5G02880	C6 transcription factor; putative [Source:UniProtKB/TrEMBL
CADAFUAG00002691	560.175	-3.21114	0.807418	-3.97705	6.97748e-05	0.000372311	AFUA_5G01360	Afu5G01360	Cytochrome P450; putative [Source:UniProtKB/TrEMBL
CADAFUAG00008982	94.324	-3.14088	0.345581	-9.08869	1.00238e-19	3.58277e-18	AFUA_1G01550	Afu1G01550	High affinity zinc ion transporter; putative [Source:UniProtKB/TrEMBL
CADAFUAG00003184	24.3136	-3.121	0.658118	-4.74231	2.1129e-06	1.57074e-05	AFUA_8G06510	Afu8G06510	Putative uncharacterized protein [Source:UniProtKB/TrEMBL
CADAFUAG00001212	128.065	-3.11058	0.38712	-8.0352	9.34298e-16	2.4222e-14	AFUA_7G00720	Afu7G00720	Putative uncharacterized protein [Source:UniProtKB/TrEMBL
CADAFUAG00001436	110.72	-3.08779	0.282618	-10.9257	8.69004e-28	5.67011e-26	AFUA_4G04380	Afu4G04380	Phenazine biosynthesis-like protein; putative [Source:UniProtKB/TrEMBL
CADAFUAG00003558	1211.3	-3.07096	0.181881	-16.8845	5.85201e-64	1.96184e-61	AFUA_2G03200	Afu2G03200	Structure-specific endonuclease subunit slx4 [Source:UniProtKB/Swiss-Prot
CADAFUAG00001021	4.96102	-3.04692	0.846056	-3.60132	0.000316604	0.00141519	AFUA_8G01430	Afu8G01430	Oxidoreductase; zinc-binding dehydrogenase family; putative [Source:UniProtKB/TrEMBL
CADAFUAG00002392	10.1446	-3.02951	0.616122	-4.91706	8.78534e-07	7.00091e-06	AFUA_4G01040	Afu4G01040	Short chain dehydrogenase; putative [Source:UniProtKB/TrEMBL
CADAFUAG00005562	0.654993	-3.00289	2.56746	-1.16959	0.242164	0.372107	AFUA_3G06160	Afu3G06160	Mating locus protein; putative [Source:UniProtKB/TrEMBL
CADAFUAG00007359	2.70938	-2.98729	0.962434	-3.10389	0.00190992	0.00680904	AFUA_1G17730	Afu1G17730	Zinc binding enoyl reductase; putative [Source:UniProtKB/TrEMBL
CADAFUAG00002507	25.2176	-2.93688	0.372362	-7.88714	3.09179e-15	7.59051e-14	AFUA_4G00400	Afu4G00400	O-methyltransferase; putative [Source:UniProtKB/TrEMBL
CADAFUAG00002479	2.35898	-2.93272	1.04576	-2.80439	0.00504122	0.015749	AFUA_4G01110	Afu4G01110	1;3-beta glucanase; putative [Source:UniProtKB/TrEMBL
CADAFUAG00000898	29.4771	-2.91948	0.537653	-5.43006	5.63366e-08	5.56045e-07	AFUA_8G01780	Afu8G01780	Nitrilase; putative [Source:UniProtKB/TrEMBL
CADAFUAG00003187	7.47945	-2.88574	0.8395	-3.43745	0.000587218	0.00243731	AFUA_8G06500	Afu8G06500	Putative uncharacterized protein [Source:UniProtKB/TrEMBL
CADAFUAG00000854	40.4332	-2.86433	0.413512	-6.92684	4.30359e-12	7.43153e-11	AFUA_8G01660	Afu8G01660	Putative uncharacterized protein [Source:UniProtKB/TrEMBL
CADAFUAG00001808	1.98868	-2.85834	1.28754	-2.22001	0.0264181	0.0636997	AFUA_6G09890	Afu6G09890	Putative uncharacterized protein [Source:UniProtKB/TrEMBL
CADAFUAG00000069	16.7626	-2.84798	0.517128	-5.50729	3.64391e-08	3.70179e-07	AFUA_3G02680	Afu3G02680	C6 finger domain protein; putative [Source:UniProtKB/TrEMBL
CADAFUAG00005540	488.385	-2.82207	0.266661	-10.583	3.57363e-26	2.08041e-24	AFUA_3G08860	Afu3G08860	Transcriptional regulator; putative [Source:UniProtKB/TrEMBL
CADAFUAG00002515	0.653069	-2.80292	1.94128	-1.44385	0.148781	0.253629	AFUA_5G00435	Afu5G00435	C6 finger domain protein; putative [Source:UniProtKB/TrEMBL
CADAFUAG00001326	218	-2.80252	0.178088	-15.7367	8.4695e-56	2.16685e-53	AFUA_4G04318	Afu4G04318	Copper resistance protein Crd2; putative [Source:UniProtKB/TrEMBL
CADAFUAG00000832	8.47052	-2.78413	0.65048	-4.28012	1.86793e-05	0.000113927	AFUA_8G00620	Afu8G00620	Dimethylallyl tryptophan synthase; putative [Source:UniProtKB/TrEMBL
CADAFUAG00003454	1173.31	-2.78142	0.152671	-18.2184	3.68776e-74	1.9918e-71	AFUA_2G01720	Afu2G01720	Putative uncharacterized protein [Source:UniProtKB/TrEMBL
CADAFUAG00000040	14.6655	-2.73581	0.50431	-5.42485	5.80025e-08	5.71328e-07	AFUA_3G02530	Afu3G02530	PKS-like enzyme; putative [Source:UniProtKB/TrEMBL
CADAFUAG00003597	131.556	-2.73197	0.227923	-11.9864	4.18821e-33	3.66827e-31	AFUA_2G01960	Afu2G01960	UbiA prenyltransferase family protein [Source:UniProtKB/TrEMBL
CADAFUAG00009855	1.48239	-2.72942	1.3336	-2.04666	0.0406915	0.0902585			8s_rRNA [Source:RNAMMER
CADAFUAG00008827	0.565127	-2.72495	1.78287	-1.52841	0.126412	0.223857	AFUA_1G01310	Afu1G01310	Carboxylesterase; putative [Source:UniProtKB/TrEMBL
CADAFUAG00001022	46.7435	-2.72342	0.361306	-7.5377	4.78348e-14	1.02434e-12	AFUA_8G00600	Afu8G00600	NAD dependent epimerase/dehydratase family protein [Source:UniProtKB/TrEMBL
CADAFUAG00001193	24.9114	-2.72334	0.346536	-7.85876	3.87945e-15	9.4055e-14	AFUA_7G00570	Afu7G00570	Conserved hypotheitcal protein [Source:UniProtKB/TrEMBL
CADAFUAG00002917	23.2482	-2.71823	0.366643	-7.41385	1.22684e-13	2.52163e-12	AFUA_5G01350	Afu5G01350	MFS multidrug transporter; putative [Source:UniProtKB/TrEMBL
CADAFUAG00000268	30.3241	-2.68696	0.41935	-6.40743	1.47998e-10	2.16692e-09	AFUA_3G00765	Afu3G00765	N-acetyltransferase; GNAT family; putative [Source:UniProtKB/TrEMBL
CADAFUAG00002576	295.421	-2.67866	0.123537	-21.683	2.96827e-104	2.62341e-101	AFUA_5G02990	Afu5G02990	Aromatic amino acid aminotransferase; putative [Source:UniProtKB/TrEMBL
CADAFUAG00001057	947.522	-2.66372	0.242837	-10.9692	5.37722e-28	3.58064e-26	AFUA_7G00280	Afu7G00280	Putative uncharacterized protein [Source:UniProtKB/TrEMBL
CADAFUAG00004207	0.625827	-2.64799	1.93842	-1.36606	0.171921	0.284787	AFUA_2G18020	Afu2G18020	Fumigaclavine B O-acetyltransferase [Source:UniProtKB/Swiss-Prot
CADAFUAG00001264	1.67769	-2.64527	1.11966	-2.36257	0.0181488	0.0466903	AFUA_7G00880	Afu7G00880	Putative uncharacterized protein [Source:UniProtKB/TrEMBL
CADAFUAG00008547	13.0721	-2.64185	0.4937	-5.35112	8.74094e-08	8.33949e-07	AFUA_4G14730	Afu4G14730	GNAT family acetyltransferase; putative [Source:UniProtKB/TrEMBL
CADAFUAG00007893	20.9366	-2.63251	0.347145	-7.58331	3.36852e-14	7.34278e-13	AFUA_4G09300	Afu4G09300	Putative uncharacterized protein [Source:UniProtKB/TrEMBL
CADAFUAG00006734	148.321	-2.63007	0.428258	-6.14132	8.18383e-10	1.0694e-08	AFUA_5G09960	Afu5G09960	GPI anchored protein; putative [Source:UniProtKB/TrEMBL
CADAFUAG00008064	21.694	-2.62743	0.399503	-6.57674	4.80887e-11	7.45644e-10	AFUA_4G08840	Afu4G08840	RING finger protein; putative [Source:UniProtKB/TrEMBL
CADAFUAG00006921	83.1616	-2.61283	0.379791	-6.87967	5.99914e-12	1.02322e-10	AFUA_1G16760	Afu1G16760	Acetyltransferase; GNAT family family [Source:UniProtKB/TrEMBL
CADAFUAG00008232	1.18314	-2.61119	1.49646	-1.74491	0.0810008	0.156777	AFUA_4G06590	Afu4G06590	Putative uncharacterized protein [Source:UniProtKB/TrEMBL
CADAFUAG00006617	25.2401	-2.60358	0.387298	-6.72241	1.78742e-11	2.9119e-10	AFUA_5G14240	Afu5G14240	ThiJ/PfpI family protein [Source:UniProtKB/TrEMBL
CADAFUAG00001105	23.9021	-2.60084	0.486081	-5.35063	8.76472e-08	8.35398e-07	AFUA_7G00270	Afu7G00270	FAD binding monooxygenase; putative [Source:UniProtKB/TrEMBL
CADAFUAG00008775	4.73215	-2.59701	1.43749	-1.80663	0.07082	0.140941	AFUA_1G00230	Afu1G00230	Putative uncharacterized protein [Source:UniProtKB/TrEMBL
CADAFUAG00000933	2.70769	-2.59611	1.39652	-1.85898	0.0630297	0.128384	AFUA_8G02320	Afu8G02320	Capsule polysaccharide synthase Cps1; putative [Source:UniProtKB/TrEMBL
CADAFUAG00000960	11.3531	-2.54286	0.947853	-2.68276	0.00730174	0.021603	AFUA_8G01790	Afu8G01790	Integral membrane protein; putative [Source:UniProtKB/TrEMBL
CADAFUAG00000277	433.868	-2.51758	0.148814	-16.9177	3.33405e-64	1.15763e-61	AFUA_3G02253	Afu3G02253	YjgH family protein [Source:UniProtKB/TrEMBL
CADAFUAG00002583	600.245	-2.50825	0.168378	-14.8965	3.4741e-50	6.75504e-48	AFUA_5G00920	Afu5G00920	Transesterase (LovD); putative [Source:UniProtKB/TrEMBL
CADAFUAG00004412	293.71	-2.5069	0.653275	-3.83744	0.000124323	0.000621597	AFUA_2G10130	Afu2G10130	Adhesin; putative [Source:UniProtKB/TrEMBL
CADAFUAG00001812	3.69597	-2.46878	0.831627	-2.96861	0.00299147	0.00999076	AFUA_6G09800	Afu6G09800	Ankyrin repeat protein [Source:UniProtKB/TrEMBL
CADAFUAG00008149	677.451	-2.46754	0.131913	-18.7059	4.43588e-78	2.69535e-75	AFUA_4G13510	Afu4G13510	Isocitrate lyase [Source:UniProtKB/Swiss-Prot
CADAFUAG00000567	290.898	-2.43237	0.219875	-11.0625	1.90691e-28	1.30556e-26	AFUA_6G04990	Afu6G04990	Amino acid transporter; putative [Source:UniProtKB/TrEMBL
CADAFUAG00004579	90.5581	-2.41795	0.229086	-10.5548	4.82804e-26	2.77741e-24	AFUA_2G17360	Afu2G17360	MFS monocarboxylate transporter (Mct); putative [Source:UniProtKB/TrEMBL
CADAFUAG00009790	0.924378	-2.41264	1.75198	-1.37709	0.168483	0.28019	AFUA_5G12212	Afu5G12212
CADAFUAG00003453	120.608	-2.40003	0.248058	-9.67528	3.84024e-22	1.7365e-20	AFUA_2G05920	Afu2G05920	Putative uncharacterized protein [Source:UniProtKB/TrEMBL
CADAFUAG00004592	14.7837	-2.39707	0.558177	-4.29445	1.75123e-05	0.000107552	AFUA_2G12740	Afu2G12740	Methyltransferase; putative [Source:UniProtKB/TrEMBL
CADAFUAG00000858	115.007	-2.3958	0.435402	-5.50249	3.74462e-08	3.78653e-07	AFUA_8G02490	Afu8G02490	Putative uncharacterized protein [Source:UniProtKB/TrEMBL
CADAFUAG00000785	30.5898	-2.38838	0.276774	-8.62933	6.17141e-18	1.8927e-16	AFUA_8G00930	Afu8G00930	Chitosanase; putative [Source:UniProtKB/TrEMBL
CADAFUAG00000882	35.1045	-2.38716	0.373089	-6.39836	1.57052e-10	2.29258e-09	AFUA_8G00820	Afu8G00820	Rhamnogalacturonase; putative [Source:UniProtKB/TrEMBL
CADAFUAG00007474	59.8868	-2.37831	0.223655	-10.6339	2.07368e-26	1.23683e-24	AFUA_1G11250	Afu1G11250	Amidohydrolase; putative [Source:UniProtKB/TrEMBL
CADAFUAG00006866	971.925	-2.36392	0.230469	-10.257	1.10042e-24	5.87819e-23	AFUA_1G15180	Afu1G15180	Putative uncharacterized protein [Source:UniProtKB/TrEMBL
CADAFUAG00000803	0.52065	-2.3438	2.09173	-1.12051	0.262496	0.396209	AFUA_8G01000	Afu8G01000	Ankyrin repeat protein [Source:UniProtKB/TrEMBL
CADAFUAG00000042	45.7099	-2.34131	0.248166	-9.43444	3.93081e-21	1.59897e-19	AFUA_3G01610	Afu3G01610	Putative uncharacterized protein [Source:UniProtKB/TrEMBL
CADAFUAG00006577	0.28081	-2.33925	3.77116	-0.620301	0.535059	0.667246
CADAFUAG00001655	1.40229	-2.31553	1.37309	-1.68637	0.0917252	0.173257	AFUA_6G09560	Afu6G09560	Putative uncharacterized protein [Source:UniProtKB/TrEMBL
CADAFUAG00004303	9.42982	-2.3149	0.607334	-3.81158	0.000138079	0.000679012	AFUA_2G10680	Afu2G10680	Putative uncharacterized protein [Source:UniProtKB/TrEMBL
CADAFUAG00009764	0.275634	-2.30822	3.77304	-0.611766	0.540693	0.672115	AFUA_2G15835	Afu2G15835
CADAFUAG00002371	62.3124	-2.30579	0.401534	-5.74246	9.33095e-09	1.04151e-07	AFUA_4G00760	Afu4G00760	Putative uncharacterized protein [Source:UniProtKB/TrEMBL
CADAFUAG00004175	36.3024	-2.30418	0.534434	-4.31144	1.62197e-05	0.000100824	AFUA_2G12720	Afu2G12720	Putative uncharacterized protein [Source:UniProtKB/TrEMBL
CADAFUAG00001248	218.522	-2.30202	0.190658	-12.0741	1.447e-33	1.30257e-31	AFUA_7G00850	Afu7G00850	GNAT family acetyltransferase; putative [Source:UniProtKB/TrEMBL
CADAFUAG00009147	43.3316	-2.29363	0.308063	-7.44532	9.67073e-14	2.01325e-12	AFUA_1G01440	Afu1G01440	Putative uncharacterized protein [Source:UniProtKB/TrEMBL
CADAFUAG00000417	2.79014	-2.28983	1.0169	-2.25177	0.0243366	0.059642	AFUA_6G02980	Afu6G02980	Probable exopolygalacturonase X [Source:UniProtKB/Swiss-Prot
CADAFUAG00002428	3.8365	-2.28941	0.77913	-2.93841	0.003299	0.010898	AFUA_4G01115	Afu4G01115	Putative uncharacterized protein [Source:UniProtKB/TrEMBL
CADAFUAG00002390	0.709064	-2.28341	2.53479	-0.900828	0.36768	0.509955	AFUA_4G01450	Afu4G01450	Phospho-2-dehydro-3-deoxyheptonate aldolase [Source:UniProtKB/TrEMBL
CADAFUAG00004901	286.873	-2.27147	0.155719	-14.5869	3.40108e-48	6.12321e-46	AFUA_2G12040	Afu2G12040	Putative uncharacterized protein [Source:UniProtKB/TrEMBL
CADAFUAG00009848	1.39731	-2.25928	1.23276	-1.83271	0.066846	0.13484			8s_rRNA [Source:RNAMMER
CADAFUAG00004435	1221.33	-2.25822	0.173592	-13.0088	1.09015e-38	1.41312e-36	AFUA_2G10370	Afu2G10370	Iron-sulfur cluster assembly accessory protein Isa2; putative [Source:UniProtKB/TrEMBL
CADAFUAG00003792	59.0335	-2.25657	0.316195	-7.13663	9.56454e-13	1.77117e-11	AFUA_2G05290	Afu2G05290	Isoflavone reductase family protein [Source:UniProtKB/TrEMBL
CADAFUAG00001011	32.9854	-2.22111	0.362115	-6.13373	8.58411e-10	1.11421e-08	AFUA_8G00170	Afu8G00170	Nonribosomal peptide synthetase 13 [Source:UniProtKB/Swiss-Prot
CADAFUAG00007003	297.114	-2.21908	0.146763	-15.1202	1.19209e-51	2.46585e-49	AFUA_1G10930	Afu1G10930	Ammonium transporter (Mep2); putative [Source:UniProtKB/TrEMBL
CADAFUAG00002639	1564.34	-2.2132	0.134913	-16.4047	1.77133e-60	5.38154e-58	AFUA_5G00790	Afu5G00790	ABC multidrug transporter; putative [Source:UniProtKB/TrEMBL
CADAFUAG00000126	22.0537	-2.21217	0.391444	-5.65131	1.59225e-08	1.70578e-07	AFUA_3G00530	Afu3G00530	ATP/GTP-binding protein; putative [Source:UniProtKB/TrEMBL
CADAFUAG00002357	2.78945	-2.20635	1.05765	-2.08609	0.0369701	0.0836063	AFUA_6G07055	Afu6G07055	Putative uncharacterized protein [Source:UniProtKB/TrEMBL
CADAFUAG00008606	42.0519	-2.19686	0.277824	-7.90738	2.62854e-15	6.50246e-14	AFUA_1G01960	Afu1G01960	Putative uncharacterized protein [Source:UniProtKB/TrEMBL
CADAFUAG00009811	0.298443	-2.1961	3.77901	-0.58113	0.561153	0.690223	AFUA_5G09813	Afu5G09813
CADAFUAG00005699	7.63976	-2.19292	0.543255	-4.03663	5.42246e-05	0.000295666	AFUA_3G08570	Afu3G08570	Putative uncharacterized protein [Source:UniProtKB/TrEMBL
CADAFUAG00005167	54.3008	-2.18273	0.396653	-5.50287	3.73659e-08	3.78408e-07	AFUA_3G14915	Afu3G14915
CADAFUAG00001278	0.237744	-2.18094	3.43365	-0.635167	0.525319	0.65811	AFUA_4G03190	Afu4G03190	Alpha;alpha-trehalose-phosphate synthase subunit; putative [Source:UniProtKB/TrEMBL
CADAFUAG00004922	122.389	-2.17845	0.18667	-11.6701	1.81278e-31	1.45652e-29	AFUA_3G07960	Afu3G07960	Alpha-ketoglutarate-dependent taurine dioxygenase [Source:UniProtKB/TrEMBL
CADAFUAG00002370	0.619179	-2.17152	2.58627	-0.839634	0.401114	0.542368	AFUA_4G00510	Afu4G00510	Putative uncharacterized protein [Source:UniProtKB/TrEMBL
CADAFUAG00001249	22.9675	-2.16276	0.375673	-5.75702	8.56102e-09	9.622e-08	AFUA_7G00200	Afu7G00200	Putative uncharacterized protein [Source:UniProtKB/TrEMBL
CADAFUAG00002628	173.624	-2.16229	0.18527	-11.6711	1.79162e-31	1.45151e-29	AFUA_5G00930	Afu5G00930	Amino acid permease; putative [Source:UniProtKB/TrEMBL
CADAFUAG00000396	1999.51	-2.16188	0.121962	-17.7259	2.64859e-70	1.17043e-67	AFUA_3G00130	Afu3G00130	Putative uncharacterized protein [Source:UniProtKB/TrEMBL
CADAFUAG00000207	671.018	-2.15631	0.237326	-9.08586	1.02878e-19	3.6503e-18	AFUA_3G01430	Afu3G01430	Benzodiazepine receptor family protein [Source:UniProtKB/TrEMBL
CADAFUAG00006692	193.736	-2.15606	0.483603	-4.45833	8.2602e-06	5.47414e-05	AFUA_5G10420	Afu5G10420	Nitrate reductase; putative [Source:UniProtKB/TrEMBL
CADAFUAG00003434	1425.45	-2.15193	0.243009	-8.85537	8.34065e-19	2.73023e-17	AFUA_2G05380	Afu2G05380	C6 transcription factor; putative [Source:UniProtKB/TrEMBL
CADAFUAG00007404	362.566	-2.15144	0.239923	-8.96722	3.04105e-19	1.0125e-17	AFUA_1G11960	Afu1G11960	Alternative NADH-dehydrogenase [Source:UniProtKB/TrEMBL
CADAFUAG00008903	1.29169	-2.14152	1.34287	-1.59473	0.110773	0.201372	AFUA_1G03670	Afu1G03670	Putative uncharacterized protein [Source:UniProtKB/TrEMBL
CADAFUAG00000659	246.186	-2.13806	0.166213	-12.8634	7.23517e-38	8.68399e-36	AFUA_6G02040	Afu6G02040	Putative uncharacterized protein [Source:UniProtKB/TrEMBL
CADAFUAG00007233	7.53347	-2.13337	0.966338	-2.20768	0.0272665	0.0653563	AFUA_1G17560	Afu1G17560	GPI anchored protein; putative [Source:UniProtKB/TrEMBL
CADAFUAG00002501	0.958548	-2.12926	1.52742	-1.39402	0.163312	0.273132	AFUA_4G01460	Afu4G01460	Putative uncharacterized protein [Source:UniProtKB/TrEMBL
CADAFUAG00001041	4.19902	-2.11606	0.961434	-2.20094	0.0277404	0.066345	AFUA_7G00810	Afu7G00810	Putative uncharacterized protein [Source:UniProtKB/TrEMBL
CADAFUAG00009352	0.477989	-2.11476	3.78578	-0.558607	0.57643	0.70332	AFUA_7G06990	Afu7G06990	GDP-D-mannose dehydratase; putative [Source:UniProtKB/TrEMBL
CADAFUAG00000811	2.40619	-2.11453	1.06706	-1.98164	0.0475192	0.102522	AFUA_8G01320	Afu8G01320	Putative uncharacterized protein [Source:UniProtKB/TrEMBL
CADAFUAG00003104	1.0399	-2.11196	1.66295	-1.27001	0.204082	0.326652	AFUA_8G06405	Afu8G06405	Isoflavone reductase family protein [Source:UniProtKB/TrEMBL
CADAFUAG00001846	4.75082	-2.10922	0.732409	-2.87983	0.00397888	0.0128003	AFUA_6G07240	Afu6G07240	4-hydroxybenzoate polyprenyl transferase; putative [Source:UniProtKB/TrEMBL
CADAFUAG00000008	53.1419	-2.09689	0.232749	-9.00923	2.07511e-19	7.05394e-18	AFUA_3G02060	Afu3G02060	MFS multidrug transporter; putative [Source:UniProtKB/TrEMBL
CADAFUAG00000351	2.41971	-2.0931	1.07977	-1.93847	0.0525654	0.111265	AFUA_3G01710	Afu3G01710	TPR domain protein [Source:UniProtKB/TrEMBL
CADAFUAG00009405	2.13846	-2.08948	1.07608	-1.94175	0.0521676	0.110616	AFUA_7G04940	Afu7G04940	Putative uncharacterized protein [Source:UniProtKB/TrEMBL
CADAFUAG00000891	367.26	-2.07606	0.352223	-5.89418	3.7655e-09	4.44274e-08	AFUA_8G00610	Afu8G00610	Cell surface protein Mas1; putative [Source:UniProtKB/TrEMBL
CADAFUAG00004731	2080.66	-2.07015	0.20351	-10.1722	2.63836e-24	1.36437e-22	AFUA_2G10690	Afu2G10690	MFS phosphate transporter; putative [Source:UniProtKB/TrEMBL
CADAFUAG00002190	1.38954	-2.06678	1.27681	-1.6187	0.105512	0.193472	AFUA_6G11960	Afu6G11960	Putative uncharacterized protein [Source:UniProtKB/TrEMBL
CADAFUAG00000416	147.326	-2.0652	0.165243	-12.498	7.65673e-36	8.09117e-34	AFUA_6G05000	Afu6G05000	Glycosyl hydrolases family 32 superfamily [Source:UniProtKB/TrEMBL
CADAFUAG00005382	0.521394	-2.06254	2.04553	-1.00832	0.313302	0.453263	AFUA_3G14360	Afu3G14360	Putative uncharacterized protein [Source:UniProtKB/TrEMBL
CADAFUAG00003414	15.896	-2.06007	0.454669	-4.53091	5.87292e-06	3.97885e-05	AFUA_2G00600	Afu2G00600	Putative uncharacterized protein [Source:UniProtKB/TrEMBL
CADAFUAG00005763	122.095	-2.05311	0.249406	-8.232	1.84115e-16	5.12885e-15	AFUA_3G15080	Afu3G15080	Putative uncharacterized protein [Source:UniProtKB/TrEMBL
CADAFUAG00000444	247.502	-2.05268	0.17537	-11.7049	1.20341e-31	9.83158e-30	AFUA_6G05080	Afu6G05080	ABC transporter; putative [Source:UniProtKB/TrEMBL
CADAFUAG00009688	0.950699	-2.05125	1.61854	-1.26734	0.205032	0.327687	AFUA_3G02005	Afu3G02005
CADAFUAG00002393	0.713158	-2.04849	2.25426	-0.908716	0.3635	0.505744	AFUA_4G00160	Afu4G00160	Short-chain dehydrogenase; putative [Source:UniProtKB/TrEMBL
CADAFUAG00006958	1.88329	-2.04555	1.05136	-1.94562	0.0517009	0.10977	AFUA_1G11020	Afu1G11020	L-arabinitol 4-dehydrogenase [Source:UniProtKB/TrEMBL
CADAFUAG00001196	20.5538	-2.03888	0.52541	-3.88054	0.000104225	0.000531623	AFUA_7G00120	Afu7G00120	Metallo-beta-lactamase domain protein [Source:UniProtKB/TrEMBL
CADAFUAG00002886	0.872636	-2.03006	1.99769	-1.0162	0.309532	0.448944	AFUA_5G01130	Afu5G01130	Putative uncharacterized protein [Source:UniProtKB/TrEMBL
CADAFUAG00009864	3.42804	-2.02733	0.934301	-2.16989	0.0300151	0.0707755			8s_rRNA [Source:RNAMMER
CADAFUAG00002495	335.79	-2.02099	0.157786	-12.8084	1.47106e-37	1.72309e-35	AFUA_4G00770	Afu4G00770	Putative uncharacterized protein [Source:UniProtKB/TrEMBL
CADAFUAG00003050	36.3819	-2.01995	0.278541	-7.25189	4.11009e-13	7.95982e-12	AFUA_8G07300	Afu8G07300	Alpha/beta hydrolase; putative [Source:UniProtKB/TrEMBL
CADAFUAG00001620	175.452	-2.01411	0.733022	-2.74769	0.00600173	0.0183314	AFUA_6G07820	Afu6G07820	Integral membrane protein; putative [Source:UniProtKB/TrEMBL
CADAFUAG00005102	3.19647	-2.01356	0.993269	-2.02721	0.0426411	0.0938762	AFUA_3G13570	Afu3G13570	Putative uncharacterized protein [Source:UniProtKB/TrEMBL
CADAFUAG00008727	20.3082	-2.01185	0.371872	-5.41006	6.30022e-08	6.1435e-07	AFUA_1G05600	Afu1G05600	Putative uncharacterized protein [Source:UniProtKB/TrEMBL
CADAFUAG00000508	194.183	-2.01006	0.465662	-4.31657	1.58469e-05	9.86956e-05	AFUA_6G03190	Afu6G03190	Putative uncharacterized protein [Source:UniProtKB/TrEMBL
CADAFUAG00000108	48.0132	-2.008	0.40411	-4.96894	6.73212e-07	5.49997e-06	AFUA_3G03500	Afu3G03500	MFS multidrug transporter; putative [Source:UniProtKB/TrEMBL
CADAFUAG00005474	2.06631	-1.99987	1.14348	-1.74893	0.0803024	0.155766	AFUA_3G13560	Afu3G13560	Toxin biosynthesis protein; putative [Source:UniProtKB/TrEMBL
CADAFUAG00001236	21.5178	-1.99392	0.40433	-4.93143	8.16308e-07	6.55338e-06	AFUA_7G00260	Afu7G00260	Squalene-hopene-cyclase; putative [Source:UniProtKB/TrEMBL
CADAFUAG00003133	3219.64	-1.97904	0.13069	-15.143	8.43242e-52	1.78217e-49	AFUA_8G05975	Afu8G05975	Phosphotransferase enzyme family protein [Source:UniProtKB/TrEMBL
CADAFUAG00000242	47.1486	-1.97865	0.380547	-5.19949	1.99838e-07	1.79558e-06	AFUA_3G00760	Afu3G00760	GNAT family N-acetyltransferase; putative [Source:UniProtKB/TrEMBL
CADAFUAG00008689	10.9059	-1.97393	0.436435	-4.52285	6.10112e-06	4.12388e-05	AFUA_1G07190	Afu1G07190	Ankyrin repeat protein [Source:UniProtKB/TrEMBL
CADAFUAG00002398	267.261	-1.97307	0.306966	-6.42766	1.2958e-10	1.91455e-09	AFUA_4G01515	Afu4G01515
CADAFUAG00006764	148.949	-1.96583	0.336869	-5.8356	5.35974e-09	6.21806e-08	AFUA_5G07650	Afu5G07650	F-box domain and ankyrin repeat protein [Source:UniProtKB/TrEMBL
CADAFUAG00006637	757.599	-1.96316	0.135134	-14.5274	8.11968e-48	1.43527e-45	AFUA_5G14820	Afu5G14820	Replication factor C subunit [Source:UniProtKB/TrEMBL
CADAFUAG00001839	26.2892	-1.96208	0.299105	-6.55983	5.38703e-11	8.28682e-10	AFUA_6G11790	Afu6G11790	Putative uncharacterized protein [Source:UniProtKB/TrEMBL
CADAFUAG00000964	664.28	-1.96111	0.212669	-9.22142	2.93204e-20	1.10486e-18	AFUA_8G00830	Afu8G00830	Putative uncharacterized protein [Source:UniProtKB/TrEMBL
CADAFUAG00002550	21.9152	-1.96087	0.422868	-4.63707	3.53386e-06	2.51142e-05	AFUA_5G02820	Afu5G02820	Putative uncharacterized protein [Source:UniProtKB/TrEMBL
CADAFUAG00002384	641.949	-1.95735	0.308954	-6.33539	2.36742e-10	3.33084e-09	AFUA_4G00460	Afu4G00460	Chlorohydrolase family protein; putative [Source:UniProtKB/TrEMBL
CADAFUAG00004815	24.8854	-1.95028	0.497177	-3.9227	8.75619e-05	0.000453903	AFUA_2G17400	Afu2G17400	C-3 sterol dehydrogenase/C-4 decarboxylase family protein [Source:UniProtKB/TrEMBL
CADAFUAG00009152	91.7145	-1.9496	0.189325	-10.2976	7.22148e-25	3.9004e-23	AFUA_1G03690	Afu1G03690	4-carboxymuconolactone decarboxylase family protein [Source:UniProtKB/TrEMBL
CADAFUAG00001128	15.4979	-1.94925	0.441272	-4.41734	9.99209e-06	6.48053e-05	AFUA_7G00740	Afu7G00740	Protein kinase; putative [Source:UniProtKB/TrEMBL
CADAFUAG00009290	388.898	-1.94105	0.150584	-12.8901	5.11625e-38	6.21752e-36	AFUA_1G02970	Afu1G02970	Salicylate hydroxylase; putative [Source:UniProtKB/TrEMBL
CADAFUAG00007385	1875.01	-1.93732	0.248333	-7.8013	6.12724e-15	1.44937e-13	AFUA_1G16564	Afu1G16564	DUF455 domain protein [Source:UniProtKB/TrEMBL
CADAFUAG00006642	5.67504	-1.93641	0.693485	-2.79229	0.00523371	0.0162979	AFUA_5G10090	Afu5G10090	3-demethylubiquinone-9 3-methyltransferase; putative [Source:UniProtKB/TrEMBL
CADAFUAG00000055	55.781	-1.93141	0.245014	-7.88284	3.20013e-15	7.81701e-14	AFUA_3G00175	Afu3G00175	Putative uncharacterized protein [Source:UniProtKB/TrEMBL
CADAFUAG00008454	566.616	-1.9072	0.234314	-8.13952	3.96843e-16	1.05992e-14	AFUA_4G07760	Afu4G07760	Amino acid transporter; putative [Source:UniProtKB/TrEMBL
CADAFUAG00003755	728.952	-1.90181	0.146126	-13.0148	1.0079e-38	1.32417e-36	AFUA_2G03900	Afu2G03900	Acetamidase/formamidase family protein [Source:UniProtKB/TrEMBL
CADAFUAG00004018	273.592	-1.89789	0.236037	-8.04063	8.9379e-16	2.32338e-14	AFUA_2G10070	Afu2G10070	Carbamoyl-phosphate synthase; large subunit [Source:UniProtKB/TrEMBL
CADAFUAG00003179	2720.56	-1.89711	0.106229	-17.8587	2.47387e-71	1.14529e-68	AFUA_8G04860	Afu8G04860	GPI anchored glycoprotein; putative [Source:UniProtKB/TrEMBL
CADAFUAG00003521	179.036	-1.89238	0.146586	-12.9097	3.96925e-38	5.01157e-36	AFUA_2G05370	Afu2G05370	Putative uncharacterized protein [Source:UniProtKB/TrEMBL
CADAFUAG00003586	31.4972	-1.8911	0.394818	-4.78981	1.66941e-06	1.27294e-05	AFUA_2G00980	Afu2G00980	Putative uncharacterized protein [Source:UniProtKB/TrEMBL
CADAFUAG00005711	77.1685	-1.8861	0.261375	-7.21608	5.35057e-13	1.02398e-11	AFUA_3G07650	Afu3G07650	Pectin methylesterase; putative [Source:UniProtKB/TrEMBL
CADAFUAG00002373	33.4347	-1.8726	0.352986	-5.30501	1.12664e-07	1.05016e-06	AFUA_4G00540	Afu4G00540	Dynamin GTPase; putative [Source:UniProtKB/TrEMBL
CADAFUAG00008722	0.559861	-1.87054	1.83321	-1.02036	0.307556	0.446944	AFUA_1G02240	Afu1G02240	Putative uncharacterized protein [Source:UniProtKB/TrEMBL
CADAFUAG00006760	504.616	-1.86718	0.102004	-18.305	7.55386e-75	4.31992e-72	AFUA_5G09350	Afu5G09350	Putative uncharacterized protein [Source:UniProtKB/TrEMBL
CADAFUAG00003892	9739.13	-1.85219	0.0941739	-19.6678	4.07407e-86	2.64054e-83	AFUA_2G01170	Afu2G01170	1;3-beta-glucanosyltransferase gel1 [Source:UniProtKB/Swiss-Prot
CADAFUAG00006731	183.364	-1.85211	0.225453	-8.21504	2.12095e-16	5.87459e-15	AFUA_5G13840	Afu5G13840	NUDIX domain; putative [Source:UniProtKB/TrEMBL
CADAFUAG00005591	0.313172	-1.84097	3.21653	-0.572347	0.567087	0.695324	AFUA_3G15380	Afu3G15380	MFS multidrug transporter; putative [Source:UniProtKB/TrEMBL
CADAFUAG00009740	0.546336	-1.83991	2.23118	-0.824634	0.40958	0.550828	AFUA_8G04476	Afu8G04476
CADAFUAG00006683	441.805	-1.83659	0.321001	-5.72145	1.0562e-08	1.16819e-07	AFUA_5G10930	Afu5G10930	Putative uncharacterized protein [Source:UniProtKB/TrEMBL
CADAFUAG00000136	21.0571	-1.83183	0.3176	-5.76772	8.03494e-09	9.08322e-08	AFUA_3G03920	Afu3G03920	C6 transcription factor; putative [Source:UniProtKB/TrEMBL
CADAFUAG00002664	85.9914	-1.8293	0.251362	-7.27754	3.39956e-13	6.61011e-12	AFUA_5G00940	Afu5G00940	Putative uncharacterized protein [Source:UniProtKB/TrEMBL
CADAFUAG00004322	5.54729	-1.81619	0.838253	-2.16664	0.0302626	0.0712209	AFUA_2G17930	Afu2G17930	Integral membrane protein [Source:UniProtKB/TrEMBL
CADAFUAG00004213	11.7373	-1.8135	0.433523	-4.18317	2.87471e-05	0.000167553	AFUA_2G15920	Afu2G15920	Putative uncharacterized protein [Source:UniProtKB/TrEMBL
CADAFUAG00003812	1383.16	-1.81118	0.220637	-8.20885	2.23312e-16	6.13288e-15	AFUA_2G04310	Afu2G04310	Argininosuccinate synthase [Source:UniProtKB/TrEMBL
CADAFUAG00003752	1.21001	-1.81115	1.36437	-1.32746	0.184355	0.301025	AFUA_2G00510	Afu2G00510	Cellulose-binding GDSL lipase/acylhydrolase; putative [Source:UniProtKB/TrEMBL
CADAFUAG00002422	122.852	-1.80208	0.174739	-10.313	6.15662e-25	3.34383e-23	AFUA_4G01570	Afu4G01570	Amino acid transporter; putative [Source:UniProtKB/TrEMBL
CADAFUAG00000036	1.94957	-1.79882	1.43913	-1.24993	0.211325	0.33529	AFUA_3G00610	Afu3G00610	Glucoamylase [Source:UniProtKB/TrEMBL
CADAFUAG00001035	18.9983	-1.79158	0.426321	-4.20243	2.64064e-05	0.000155669	AFUA_7G01050	Afu7G01050	Salicylate hydroxylase; putative [Source:UniProtKB/TrEMBL
CADAFUAG00000865	43.2958	-1.7905	0.399314	-4.48394	7.32778e-06	4.91315e-05	AFUA_8G00920	Afu8G00920	UDP-glucose dehydrogenase Ugd1; putative [Source:UniProtKB/TrEMBL
CADAFUAG00004562	223.671	-1.78907	0.167667	-10.6704	1.40008e-26	8.45438e-25	AFUA_2G10420	Afu2G10420	Branched-chain-amino-acid aminotransferase [Source:UniProtKB/TrEMBL
CADAFUAG00001292	178.219	-1.78712	0.202291	-8.83437	1.00662e-18	3.26211e-17	AFUA_4G04560	Afu4G04560	GTP binding protein; putative [Source:UniProtKB/TrEMBL
CADAFUAG00000029	779.727	-1.77779	0.545271	-3.26037	0.00111267	0.00427548	AFUA_3G03290	Afu3G03290	Putative uncharacterized protein [Source:UniProtKB/TrEMBL
CADAFUAG00001518	170.981	-1.77724	0.22312	-7.96538	1.64717e-15	4.13792e-14	AFUA_6G00412	Afu6G00412	Amino acid permease; putative [Source:UniProtKB/TrEMBL
CADAFUAG00008654	92.3151	-1.77604	0.313547	-5.66435	1.47585e-08	1.58895e-07	AFUA_1G06150	Afu1G06150	L-serine dehydratase; putative [Source:UniProtKB/TrEMBL
CADAFUAG00009722	1.9874	-1.76721	1.2358	-1.43001	0.152714	0.259334	AFUA_7G00365	Afu7G00365
CADAFUAG00002954	321.048	-1.76642	0.279816	-6.31278	2.7406e-10	3.81175e-09	AFUA_8G04340	Afu8G04340	Cystathionine gamma-lyase [Source:UniProtKB/TrEMBL
CADAFUAG00000147	0.433784	-1.76405	3.00059	-0.587901	0.556599	0.686011	AFUA_3G02540	Afu3G02540	Putative uncharacterized protein [Source:UniProtKB/TrEMBL
CADAFUAG00009279	59.9411	-1.76336	0.308613	-5.71381	1.10474e-08	1.21223e-07	AFUA_1G01530	Afu1G01530	GrpB domain protein [Source:UniProtKB/TrEMBL
CADAFUAG00000906	25.0895	-1.76316	0.357954	-4.92568	8.40673e-07	6.72677e-06	AFUA_8G00910	Afu8G00910	Putative uncharacterized protein [Source:UniProtKB/TrEMBL
CADAFUAG00001163	452.959	-1.75606	0.219105	-8.01467	1.10437e-15	2.84794e-14	AFUA_7G00150	Afu7G00150	FAD-dependent monooxygenase; putative [Source:UniProtKB/TrEMBL
CADAFUAG00001940	1832.67	-1.75505	0.146683	-11.9649	5.42488e-33	4.66731e-31	AFUA_6G13790	Afu6G13790	Flavin-binding monooxygenase; putative [Source:UniProtKB/TrEMBL
CADAFUAG00005264	1058.15	-1.75197	0.116407	-15.0504	3.43157e-51	6.95036e-49	AFUA_3G08200	Afu3G08200	Alpha-mannosidase [Source:UniProtKB/TrEMBL
CADAFUAG00000299	0.284829	-1.75171	3.32019	-0.527594	0.597781	0.721583	AFUA_3G02110	Afu3G02110	MFS multidrug transporter; putative [Source:UniProtKB/TrEMBL
CADAFUAG00000023	1.85622	-1.74785	1.36697	-1.27863	0.201026	0.322771	AFUA_3G02930	Afu3G02930	Extracellular soluble lytic transglycosylase; putative [Source:UniProtKB/TrEMBL
CADAFUAG00002430	63.0464	-1.74771	0.368538	-4.74228	2.11328e-06	1.57074e-05	AFUA_4G00720	Afu4G00720	Protein phosphatase 2C; putative [Source:UniProtKB/TrEMBL
CADAFUAG00001654	6.47958	-1.74764	0.580473	-3.01072	0.00260633	0.00885659	AFUA_6G09785	Afu6G09785	Putative uncharacterized protein [Source:UniProtKB/TrEMBL
CADAFUAG00000585	122.5	-1.74473	0.327537	-5.32683	9.994e-08	9.43318e-07	AFUA_6G05160	Afu6G05160	C2H2 transcription factor (Azf1); putative [Source:UniProtKB/TrEMBL
CADAFUAG00002439	12.6775	-1.74152	0.45287	-3.84551	0.000120303	0.000603809	AFUA_4G00480	Afu4G00480	MFS multidrug transporter; putative [Source:UniProtKB/TrEMBL
CADAFUAG00000113	14.9025	-1.74021	0.481302	-3.61564	0.000299609	0.0013479	AFUA_3G02685	Afu3G02685	Putative uncharacterized protein [Source:UniProtKB/TrEMBL
CADAFUAG00003411	2.81648	-1.73681	0.936912	-1.85376	0.0637739	0.129628	AFUA_2G00700	Afu2G00700	Putative uncharacterized protein [Source:UniProtKB/TrEMBL
CADAFUAG00004311	283.78	-1.73579	0.147763	-11.7471	7.30446e-32	6.17512e-30	AFUA_2G08110	Afu2G08110	Hexokinase family protein [Source:UniProtKB/TrEMBL
CADAFUAG00009858	160.686	-1.72988	0.318824	-5.4258	5.76947e-08	5.68872e-07			RNase MRP [Source:RFAM
CADAFUAG00000954	0.179592	-1.72451	3.80861	-0.452793	0.650698	0.765777	AFUA_8G01610	Afu8G01610	Putative uncharacterized protein [Source:UniProtKB/TrEMBL
CADAFUAG00009709	0.179592	-1.72451	3.80861	-0.452793	0.650698	0.765777	AFUA_6G03855	Afu6G03855
CADAFUAG00007647	26.419	-1.72028	0.343746	-5.00451	5.60033e-07	4.61802e-06	AFUA_1G17050	Afu1G17050	Putative uncharacterized protein [Source:UniProtKB/TrEMBL
CADAFUAG00001332	4.30271	-1.71745	0.774352	-2.21792	0.0265603	0.0639632	AFUA_4G02720	Afu4G02720	GPI anchored glycosyl hydrolase; putative [Source:UniProtKB/TrEMBL
CADAFUAG00004399	1596.84	-1.70682	0.335847	-5.08213	3.73226e-07	3.18569e-06	AFUA_2G11300	Afu2G11300	Methylenetetrahydrofolate reductase [Source:UniProtKB/TrEMBL
CADAFUAG00008561	1049.01	-1.70573	0.178693	-9.54558	1.35351e-21	5.64755e-20	AFUA_4G10460	Afu4G10460	Homocitrate synthase [Source:UniProtKB/TrEMBL
CADAFUAG00004246	9.84624	-1.69913	0.686037	-2.47673	0.013259	0.0358865	AFUA_2G12730	Afu2G12730	Putative uncharacterized protein [Source:UniProtKB/TrEMBL
CADAFUAG00001399	90.0161	-1.68931	0.249723	-6.76476	1.33529e-11	2.20028e-10	AFUA_4G03310	Afu4G03310	C6 finger domain protein; putative [Source:UniProtKB/TrEMBL
CADAFUAG00007959	81.8839	-1.68921	0.186586	-9.05326	1.38767e-19	4.85285e-18	AFUA_4G10630	Afu4G10630	Sister chromatid cohesion protein Ctf8; putative [Source:UniProtKB/TrEMBL
CADAFUAG00003485	8.18823	-1.68912	0.75772	-2.22921	0.0257997	0.0625341	AFUA_2G00620	Afu2G00620	GDSL-like lipase/acylhydrolase domain protein [Source:UniProtKB/TrEMBL
CADAFUAG00008198	12.6582	-1.68824	0.481167	-3.50864	0.000450409	0.00193584	AFUA_4G08850	Afu4G08850	Putative uncharacterized protein [Source:UniProtKB/TrEMBL
CADAFUAG00002469	10.1582	-1.68703	0.576437	-2.92664	0.0034264	0.0112691	AFUA_4G01270	Afu4G01270	Integral membrane protein [Source:UniProtKB/TrEMBL
CADAFUAG00005596	30146.9	-1.67438	0.543318	-3.08177	0.00205776	0.00723268	AFUA_3G14940	Afu3G14940	Elastase inhibitor AFUEI [Source:UniProtKB/Swiss-Prot
CADAFUAG00009742	2.0152	-1.67352	1.08017	-1.54931	0.121307	0.216712	AFUA_8G05995	Afu8G05995
CADAFUAG00008106	31.2765	-1.66226	0.431696	-3.85054	0.000117857	0.00059399	AFUA_4G12510	Afu4G12510	Putative uncharacterized protein [Source:UniProtKB/TrEMBL
CADAFUAG00000930	800.527	-1.66165	0.230937	-7.19526	6.23423e-13	1.17688e-11	AFUA_8G02860	Afu8G02860	AMP deaminase Amd1; putative [Source:UniProtKB/TrEMBL
CADAFUAG00002602	106.106	-1.66156	0.442944	-3.75117	0.000176013	0.000838822	AFUA_5G01590	Afu5G01590	Geranylgeranyl pyrophosphate synthase; putative [Source:UniProtKB/TrEMBL
CADAFUAG00004453	21.3663	-1.65924	0.326257	-5.08569	3.66292e-07	3.13476e-06	AFUA_2G08120	Afu2G08120	MFS monosaccharide transporter (Hxt8); putative [Source:UniProtKB/TrEMBL
CADAFUAG00006165	51.3221	-1.65463	0.265783	-6.2255	4.8002e-10	6.45471e-09	AFUA_5G14030	Afu5G14030	Endo-1;3(4)-beta-glucanase; putative [Source:UniProtKB/TrEMBL
CADAFUAG00002521	766.657	-1.6528	0.207413	-7.96865	1.60416e-15	4.05081e-14	AFUA_5G02870	Afu5G02870	Oxidoreductase; short-chain dehydrogenase/reductase family [Source:UniProtKB/TrEMBL
CADAFUAG00004777	334.701	-1.65024	0.179427	-9.19728	3.67109e-20	1.36745e-18	AFUA_2G16340	Afu2G16340	Putative uncharacterized protein [Source:UniProtKB/TrEMBL
CADAFUAG00002719	33.8012	-1.64681	0.419824	-3.92263	8.75871e-05	0.000453903	AFUA_5G03540	Afu5G03540	Thioredoxin reductase; putative [Source:UniProtKB/TrEMBL
CADAFUAG00001294	712.511	-1.6428	0.382494	-4.29496	1.74722e-05	0.000107441	AFUA_4G03120	Afu4G03120	Mitochondrial cytochrome b2; putative [Source:UniProtKB/TrEMBL
CADAFUAG00002038	174.771	-1.64212	0.260062	-6.31433	2.7133e-10	3.77918e-09	AFUA_6G14410	Afu6G14410	Amidase family protein [Source:UniProtKB/TrEMBL
CADAFUAG00009310	91.4288	-1.63885	0.375464	-4.36487	1.27198e-05	8.07194e-05	AFUA_7G05560	Afu7G05560	Putative uncharacterized protein [Source:UniProtKB/TrEMBL
CADAFUAG00000793	0.231116	-1.62933	3.50463	-0.464907	0.641998	0.758569	AFUA_8G01200	Afu8G01200	Putative uncharacterized protein [Source:UniProtKB/TrEMBL
CADAFUAG00000962	1.22914	-1.62924	1.35547	-1.20197	0.229376	0.356347	AFUA_8G00210	Afu8G00210	Dimethylallyl tryptophan synthase FtmPT1 [Source:UniProtKB/TrEMBL
CADAFUAG00005090	378.901	-1.62012	0.165022	-9.81762	9.45465e-23	4.44049e-21	AFUA_3G07790	Afu3G07790	Argininosuccinate lyase [Source:UniProtKB/TrEMBL
CADAFUAG00002472	299.29	-1.61748	0.130931	-12.3537	4.65351e-35	4.66406e-33	AFUA_4G00930	Afu4G00930	CorA family metal ion transporter; putative [Source:UniProtKB/TrEMBL
CADAFUAG00008229	5.60931	-1.6129	0.774843	-2.08159	0.03738	0.084337	AFUA_4G12420	Afu4G12420	Putative uncharacterized protein [Source:UniProtKB/TrEMBL
CADAFUAG00008772	159.641	-1.61159	0.245857	-6.55499	5.56455e-11	8.54638e-10	AFUA_1G01940	Afu1G01940	Putative uncharacterized protein [Source:UniProtKB/TrEMBL
CADAFUAG00001180	279.459	-1.60816	0.183383	-8.76941	1.79599e-18	5.76256e-17	AFUA_7G00480	Afu7G00480	ABC multidrug transporter; putative [Source:UniProtKB/TrEMBL
CADAFUAG00008725	1.86446	-1.60245	1.1811	-1.35675	0.174862	0.288529	AFUA_1G01300	Afu1G01300	GPI anchored protein; putative [Source:UniProtKB/TrEMBL
CADAFUAG00002538	20183.4	-1.60222	0.257521	-6.2217	4.91807e-10	6.58588e-09	AFUA_5G03010	Afu5G03010	Putative uncharacterized protein [Source:UniProtKB/TrEMBL
CADAFUAG00002766	251.423	-1.60128	0.15404	-10.3952	2.60672e-25	1.42374e-23	AFUA_5G02970	Afu5G02970	LCCL domain protein [Source:UniProtKB/TrEMBL
CADAFUAG00003430	131.454	-1.59911	0.162924	-9.81503	9.70112e-23	4.53434e-21	AFUA_2G06205	Afu2G06205	Protein yippee-like [Source:UniProtKB/TrEMBL
CADAFUAG00001009	3.65942	-1.59886	0.815466	-1.96066	0.0499182	0.106731	AFUA_8G02020	Afu8G02020	Glycosyltransferase; putative [Source:UniProtKB/TrEMBL
CADAFUAG00003826	90.1834	-1.5971	0.229328	-6.96425	3.30155e-12	5.79381e-11	AFUA_2G01970	Afu2G01970	Putative uncharacterized protein [Source:UniProtKB/TrEMBL
CADAFUAG00000969	15.4956	-1.59633	0.430771	-3.70576	0.000210755	0.000986973	AFUA_8G02030	Afu8G02030	Putative uncharacterized protein [Source:UniProtKB/TrEMBL
CADAFUAG00009562	2.31059	-1.59526	1.08952	-1.46419	0.143143	0.246489	AFUA_7G05110	Afu7G05110	Putative uncharacterized protein [Source:UniProtKB/TrEMBL
CADAFUAG00009842	0.286946	-1.58953	2.70649	-0.587305	0.556999	0.68633	AFUA_4G13203	Afu4G13203
CADAFUAG00004682	694	-1.58908	0.280887	-5.65738	1.53703e-08	1.65299e-07	AFUA_2G12470	Afu2G12470	Acetylornithine aminotransferase [Source:UniProtKB/TrEMBL
CADAFUAG00002506	38.8011	-1.58809	0.385083	-4.12404	3.72289e-05	0.000212157	AFUA_4G00710	Afu4G00710	C6 transcription factor; putative [Source:UniProtKB/TrEMBL
CADAFUAG00007857	269.367	-1.58583	0.168637	-9.40382	5.26179e-21	2.12262e-19	AFUA_4G07190	Afu4G07190	Ornithine carbamoyltransferase [Source:UniProtKB/TrEMBL
CADAFUAG00009393	901.624	-1.58531	0.146099	-10.8509	1.97376e-27	1.25417e-25	AFUA_7G05015	Afu7G05015	Glyoxalase family protein [Source:UniProtKB/TrEMBL
CADAFUAG00006147	634.589	-1.58345	0.135791	-11.6609	2.01821e-31	1.60828e-29	AFUA_5G08480	Afu5G08480	Serine/threonine protein kinase; putative [Source:UniProtKB/TrEMBL
CADAFUAG00000160	0.118892	-1.57896	3.7991	-0.415614	0.677693	0.78669	AFUA_3G02410	Afu3G02410
CADAFUAG00008330	182.303	-1.57463	0.288552	-5.457	4.84244e-08	4.8335e-07	AFUA_4G13600	Afu4G13600	C2H2 finger domain protein; putative [Source:UniProtKB/TrEMBL
CADAFUAG00001338	145.697	-1.57081	0.136422	-11.5144	1.11662e-30	8.61571e-29	AFUA_4G04540	Afu4G04540	C4-dicarboxylate transporter/malic acid transport protein; putative [Source:UniProtKB/TrEMBL
CADAFUAG00000134	1028.49	-1.56675	0.121513	-12.8937	4.8852e-38	6.01189e-36	AFUA_3G04240	Afu3G04240	Lipase/serine esterase; putative [Source:UniProtKB/TrEMBL
CADAFUAG00008571	1010.94	-1.56276	0.161667	-9.66656	4.1819e-22	1.85646e-20	AFUA_4G10090	Afu4G10090	GABA permease; putative [Source:UniProtKB/TrEMBL
CADAFUAG00006606	420.652	-1.56079	0.163279	-9.55904	1.18854e-21	5.00217e-20	AFUA_5G10640	Afu5G10640	Tyrosyl-tRNA synthetase [Source:UniProtKB/TrEMBL
CADAFUAG00002114	0.812473	-1.55985	2.04458	-0.762922	0.44551	0.584865	AFUA_6G11500	Afu6G11500	Dipeptidase; putative [Source:UniProtKB/TrEMBL
CADAFUAG00004650	6.92943	-1.55879	0.602577	-2.58687	0.0096852	0.0275481	AFUA_2G17260	Afu2G17260	Phosphoesterase; putative [Source:UniProtKB/TrEMBL
CADAFUAG00004384	4868.12	-1.55446	0.245287	-6.33733	2.33788e-10	3.29404e-09	AFUA_2G13690	Afu2G13690	Ubiquitin conjugating enzyme; putative [Source:UniProtKB/TrEMBL
CADAFUAG00001615	32.3442	-1.54982	0.27571	-5.62118	1.89658e-08	2.00637e-07	AFUA_6G09790	Afu6G09790	LysM domain protein; putative [Source:UniProtKB/TrEMBL
CADAFUAG00009387	6.61792	-1.54557	0.541628	-2.85356	0.00432329	0.0137491	AFUA_7G04000	Afu7G04000	Putative uncharacterized protein [Source:UniProtKB/TrEMBL
CADAFUAG00008328	175.364	-1.54152	0.169116	-9.11515	7.85582e-20	2.84979e-18	AFUA_4G07605	Afu4G07605	Ribosomal protein L34 [Source:UniProtKB/TrEMBL
CADAFUAG00002604	35.2024	-1.54124	0.257262	-5.99094	2.08631e-09	2.58055e-08	AFUA_5G01310	Afu5G01310	RTA1 domain protein; putative [Source:UniProtKB/TrEMBL
CADAFUAG00000218	4.43009	-1.53993	0.677462	-2.27309	0.0230207	0.0569485	AFUA_3G03000	Afu3G03000	Phosphatidylethanolamine-binding protein; putative [Source:UniProtKB/TrEMBL
CADAFUAG00008107	894.919	-1.53454	0.217599	-7.05212	1.76209e-12	3.17242e-11	AFUA_4G09890	Afu4G09890	Putative uncharacterized protein [Source:UniProtKB/TrEMBL
CADAFUAG00001493	724.158	-1.53356	0.228051	-6.72465	1.7602e-11	2.87608e-10	AFUA_6G00680	Afu6G00680	Putative uncharacterized protein [Source:UniProtKB/TrEMBL
CADAFUAG00003109	750.897	-1.53026	0.199365	-7.67569	1.64526e-14	3.72849e-13	AFUA_8G06080	Afu8G06080	Flavohemoprotein; putative [Source:UniProtKB/TrEMBL
CADAFUAG00002484	12.3612	-1.52967	0.46437	-3.29408	0.00098745	0.00384769	AFUA_4G01105	Afu4G01105	C6 and C2H2 transcription factor; putative [Source:UniProtKB/TrEMBL
CADAFUAG00000538	3.38261	-1.52844	0.97534	-1.56708	0.117095	0.210452	AFUA_6G03370	Afu6G03370	Short-chain dehydrogenase/reductase; putative [Source:UniProtKB/TrEMBL
CADAFUAG00007975	11.5384	-1.52587	0.39312	-3.88143	0.000103843	0.000530232	AFUA_4G10560	Afu4G10560	Putative uncharacterized protein [Source:UniProtKB/TrEMBL
CADAFUAG00004481	0.181064	-1.52417	3.79337	-0.401797	0.687833	0.794572	AFUA_2G12660	Afu2G12660	Polyprenyl synthetase family protein [Source:UniProtKB/TrEMBL
CADAFUAG00006064	2.20099	-1.52254	1.03353	-1.47314	0.140713	0.243138	AFUA_5G06915	Afu5G06915	Putative uncharacterized protein [Source:UniProtKB/TrEMBL
CADAFUAG00000833	22.1414	-1.52074	0.33503	-4.53911	5.64922e-06	3.84068e-05	AFUA_8G01760	Afu8G01760	Putative uncharacterized protein [Source:UniProtKB/TrEMBL
CADAFUAG00001115	1.19825	-1.52037	1.23817	-1.22792	0.219478	0.344632	AFUA_7G00890	Afu7G00890	Putative uncharacterized protein [Source:UniProtKB/TrEMBL
CADAFUAG00008697	212.215	-1.51358	0.357859	-4.22954	2.34175e-05	0.000139586	AFUA_1G01190	Afu1G01190	Putative uncharacterized protein [Source:UniProtKB/TrEMBL
CADAFUAG00005013	166.265	-1.51305	0.371203	-4.07606	4.58044e-05	0.000255485	AFUA_3G14910	Afu3G14910	FacC-like extracellular signaling protein; putative [Source:UniProtKB/TrEMBL
CADAFUAG00009018	1165.92	-1.51094	0.195992	-7.70919	1.26616e-14	2.88281e-13	AFUA_1G03660	Afu1G03660	Acid phosphatase; putative [Source:UniProtKB/TrEMBL
CADAFUAG00009830	27.2532	-1.49936	0.446011	-3.36171	0.000774623	0.00311746	AFUA_1G16565	Afu1G16565
CADAFUAG00004437	213.705	-1.49867	0.219206	-6.8368	8.09835e-12	1.36215e-10	AFUA_2G13460	Afu2G13460	Alpha-amylase; putative [Source:UniProtKB/TrEMBL
CADAFUAG00002876	15.178	-1.49713	0.405084	-3.69586	0.000219145	0.00102086	AFUA_5G00520	Afu5G00520	C6 transcription factor; putative [Source:UniProtKB/TrEMBL
CADAFUAG00008687	439.032	-1.49487	0.148517	-10.0653	7.86286e-24	3.90014e-22	AFUA_1G02110	Afu1G02110	Phospho-2-dehydro-3-deoxyheptonate aldolase [Source:UniProtKB/TrEMBL
CADAFUAG00002743	4.61816	-1.49336	0.81209	-1.83891	0.0659286	0.133422	AFUA_5G01260	Afu5G01260	Ankyrin repeat protein [Source:UniProtKB/TrEMBL
CADAFUAG00005709	73.2219	-1.48779	0.23165	-6.42259	1.33974e-10	1.9705e-09	AFUA_3G05660	Afu3G05660	MFS monocarboxylate transporter; putative [Source:UniProtKB/TrEMBL
CADAFUAG00000077	21.4191	-1.48676	0.373291	-3.98284	6.80979e-05	0.000364564	AFUA_3G00770	Afu3G00770	Putative uncharacterized protein [Source:UniProtKB/TrEMBL
CADAFUAG00007988	155.854	-1.48528	0.182699	-8.12963	4.30613e-16	1.14697e-14	AFUA_4G10790	Afu4G10790	Phosphoribosyl diphosphate synthase isoform 4 [Source:UniProtKB/TrEMBL
CADAFUAG00009586	129457	-1.4823	0.360795	-4.10843	3.98366e-05	0.000225826	AFUA_7G05490	Afu7G05490	Putative uncharacterized protein [Source:UniProtKB/TrEMBL
CADAFUAG00003668	222.114	-1.48189	0.271148	-5.46524	4.62288e-08	4.62859e-07	AFUA_2G01710	Afu2G01710	GPI anchored protein; putative [Source:UniProtKB/TrEMBL
CADAFUAG00007614	219.147	-1.47806	0.154332	-9.57716	9.97529e-22	4.23492e-20	AFUA_1G09700	Afu1G09700	Ankyrin repeat protein [Source:UniProtKB/TrEMBL
CADAFUAG00005306	589.19	-1.47727	0.268478	-5.50239	3.7468e-08	3.78653e-07	AFUA_3G06850	Afu3G06850	Putative uncharacterized protein [Source:UniProtKB/TrEMBL
CADAFUAG00007533	12.6136	-1.47643	0.490839	-3.00798	0.00262991	0.00892736	AFUA_1G10250	Afu1G10250	Putative uncharacterized protein [Source:UniProtKB/TrEMBL
CADAFUAG00001333	1.18026	-1.47445	1.38947	-1.06116	0.288619	0.425855	AFUA_4G03615	Afu4G03615	Conidiation protein Con-6; putative [Source:UniProtKB/TrEMBL
CADAFUAG00002615	224.724	-1.47288	0.221139	-6.66044	2.73001e-11	4.33679e-10	AFUA_5G01580	Afu5G01580	Oxidoreductase; short chain dehydrogenase/reductase family [Source:UniProtKB/TrEMBL
CADAFUAG00002100	52.0953	-1.46625	0.327572	-4.47612	7.60134e-06	5.08605e-05	AFUA_6G07050	Afu6G07050	Na+/H+ antiporter; putative [Source:UniProtKB/TrEMBL
CADAFUAG00004117	59.1015	-1.45979	0.332552	-4.38967	1.13523e-05	7.28976e-05	AFUA_2G08830	Afu2G08830	Nickel transport protein; putative [Source:UniProtKB/TrEMBL
CADAFUAG00009467	171.703	-1.45735	0.293967	-4.95754	7.13909e-07	5.80805e-06	AFUA_7G04811	Afu7G04811	Putative uncharacterized protein [Source:UniProtKB/TrEMBL
CADAFUAG00009741	0.562004	-1.45658	2.35696	-0.61799	0.536582	0.668715	AFUA_8G06045	Afu8G06045
CADAFUAG00006115	0.720427	-1.45485	2.32233	-0.62646	0.531013	0.663306	AFUA_5G10340	Afu5G10340	MFS transporter; putative [Source:UniProtKB/TrEMBL
CADAFUAG00006334	512.768	-1.45001	0.27607	-5.25231	1.50203e-07	1.37115e-06	AFUA_5G07330	Afu5G07330	Carboxypeptidase S1; putative [Source:UniProtKB/TrEMBL
CADAFUAG00001137	566.193	-1.44515	0.225195	-6.41735	1.38669e-10	2.03339e-09	AFUA_7G00380	Afu7G00380	GNAT family acetyltransferase; putative [Source:UniProtKB/TrEMBL
CADAFUAG00008559	531.736	-1.4449	0.151127	-9.56086	1.16785e-21	4.93644e-20	AFUA_4G11980	Afu4G11980	Anthranilate phosphoribosyltransferase; putative [Source:UniProtKB/TrEMBL
CADAFUAG00003483	287.47	-1.44352	0.194992	-7.40296	1.33181e-13	2.70875e-12	AFUA_2G06200	Afu2G06200	Putative uncharacterized protein [Source:UniProtKB/TrEMBL
CADAFUAG00000565	60.1938	-1.44146	0.282561	-5.10139	3.37161e-07	2.91108e-06	AFUA_6G02705	Afu6G02705	Putative uncharacterized protein [Source:UniProtKB/TrEMBL
CADAFUAG00003813	64.0051	-1.43994	0.329975	-4.36378	1.27834e-05	8.10168e-05	AFUA_2G01480	Afu2G01480	Nucleolar protein 16 [Source:UniProtKB/Swiss-Prot
CADAFUAG00007873	5.76926	-1.43933	0.560532	-2.56779	0.0102349	0.0288584	AFUA_4G07000	Afu4G07000	Tyrosine phosphatase family protein [Source:UniProtKB/TrEMBL
CADAFUAG00009860	4.77109	-1.43853	0.872165	-1.64938	0.0990695	0.184054			8s_rRNA [Source:RNAMMER
CADAFUAG00002005	3.24211	-1.43506	0.79801	-1.7983	0.07213	0.143053	AFUA_6G11800	Afu6G11800	RTA1 domain protein; putative [Source:UniProtKB/TrEMBL
CADAFUAG00007718	198.839	-1.43445	0.175651	-8.16649	3.17494e-16	8.59797e-15	AFUA_4G06160	Afu4G06160	Branched-chain-amino-acid aminotransferase [Source:UniProtKB/TrEMBL
CADAFUAG00000925	14.7893	-1.43421	0.531173	-2.70007	0.00693248	0.0206678	AFUA_8G01795	Afu8G01795	Putative uncharacterized protein [Source:UniProtKB/TrEMBL
CADAFUAG00004320	65.7054	-1.43187	0.304819	-4.69743	2.63449e-06	1.92575e-05	AFUA_2G12650	Afu2G12650	DUF636 domain protein [Source:UniProtKB/TrEMBL
CADAFUAG00004838	1.12526	-1.43107	2.02193	-0.707772	0.479087	0.615607	AFUA_2G18070	Afu2G18070	Metalloproteinase; putative [Source:UniProtKB/TrEMBL
CADAFUAG00004426	14.3765	-1.42751	0.62361	-2.2891	0.0220733	0.0550812	AFUA_2G17690	Afu2G17690	Putative uncharacterized protein [Source:UniProtKB/TrEMBL
CADAFUAG00007377	1066.66	-1.42713	0.131023	-10.8923	1.2547e-27	8.07829e-26	AFUA_1G16570	Afu1G16570	MIND kinetochore complex component Mtw1; putative [Source:UniProtKB/TrEMBL
CADAFUAG00005133	4.38256	-1.42517	0.668812	-2.1309	0.0330976	0.0765039	AFUA_3G12220	Afu3G12220	ABC transporter; putative [Source:UniProtKB/TrEMBL
CADAFUAG00000271	190.068	-1.42111	0.149424	-9.51058	1.89596e-21	7.77745e-20	AFUA_3G02250	Afu3G02250	3-beta hydroxysteroid dehydrogenase/isomerase family protein [Source:UniProtKB/TrEMBL
CADAFUAG00002218	12.5662	-1.41766	0.470034	-3.01608	0.00256063	0.00872398	AFUA_6G11750	Afu6G11750	C6 transcription factor; putative [Source:UniProtKB/TrEMBL
CADAFUAG00003568	1.91414	-1.41743	1.01145	-1.40139	0.161098	0.270192	AFUA_2G05300	Afu2G05300	Putative uncharacterized protein [Source:UniProtKB/TrEMBL
CADAFUAG00000988	646.777	-1.41198	0.1746	-8.08694	6.11843e-16	1.6164e-14	AFUA_8G01340	Afu8G01340	MFS sugar transporter; putative [Source:UniProtKB/TrEMBL
CADAFUAG00002768	45.6093	-1.41187	0.225866	-6.25091	4.08058e-10	5.5407e-09	AFUA_5G00990	Afu5G00990	Putative uncharacterized protein [Source:UniProtKB/TrEMBL
CADAFUAG00002686	47.2432	-1.41012	0.207062	-6.81016	9.74917e-12	1.6202e-10	AFUA_5G02890	Afu5G02890	Putative uncharacterized protein [Source:UniProtKB/TrEMBL
CADAFUAG00002591	647.48	-1.40937	0.244433	-5.76588	8.12329e-09	9.16179e-08	AFUA_5G02860	Afu5G02860	Integral membrane protein; putative [Source:UniProtKB/TrEMBL
CADAFUAG00009746	0.701188	-1.40622	1.71214	-0.821321	0.411464	0.552726	AFUA_2G05999	Afu2G05999
CADAFUAG00004106	0.47317	-1.40121	2.33709	-0.599556	0.548802	0.678811	AFUA_2G09420	Afu2G09420	F-box domain protein [Source:UniProtKB/TrEMBL
CADAFUAG00008279	462.982	-1.39594	0.346591	-4.02761	5.63465e-05	0.000305011	AFUA_4G10620	Afu4G10620	Probable 4-hydroxyphenylpyruvate dioxygenase 2 [Source:UniProtKB/Swiss-Prot
CADAFUAG00000823	0.866606	-1.39545	1.77077	-0.788046	0.43067	0.570976	AFUA_8G02260	Afu8G02260	Neutral amino acid permease [Source:UniProtKB/TrEMBL
CADAFUAG00001604	679.999	-1.39474	0.239796	-5.81638	6.01343e-09	6.90231e-08	AFUA_6G07390	Afu6G07390	Isocitrate dehydrogenase LysB [Source:UniProtKB/TrEMBL
CADAFUAG00007414	10.1672	-1.39087	0.477088	-2.91533	0.00355313	0.0116347	AFUA_1G16420	Afu1G16420	GPI anchored protein; putative [Source:UniProtKB/TrEMBL
CADAFUAG00001052	2.67867	-1.38948	1.03835	-1.33816	0.180845	0.296638	AFUA_7G01170	Afu7G01170	Putative uncharacterized protein [Source:UniProtKB/TrEMBL
CADAFUAG00008265	1365.59	-1.38918	0.103966	-13.3618	1.01107e-40	1.38445e-38	AFUA_4G06020	Afu4G06020	Cyclin dependent kinase inhibitor Pho81; putative [Source:UniProtKB/TrEMBL
CADAFUAG00009686	115.205	-1.38787	0.353513	-3.92593	8.63936e-05	0.000448914	AFUA_7G04570	Afu7G04570	Na/K ATPase alpha 1 subunit; putative [Source:UniProtKB/TrEMBL
CADAFUAG00005896	2.4326	-1.38691	1.07562	-1.2894	0.197259	0.317895	AFUA_5G14190	Afu5G14190	Beta-glucanase; putative [Source:UniProtKB/TrEMBL
CADAFUAG00000900	460.853	-1.37705	0.142393	-9.67077	4.01343e-22	1.78984e-20	AFUA_8G00590	Afu8G00590	Fatty acid desaturase; putative [Source:UniProtKB/TrEMBL
CADAFUAG00009483	87.7355	-1.37387	0.190553	-7.20991	5.59879e-13	1.06728e-11	AFUA_7G04500	Afu7G04500	ATP phosphoribosyltransferase His1; putative [Source:UniProtKB/TrEMBL
CADAFUAG00005621	0.975695	-1.3691	1.39124	-0.984089	0.325072	0.464825	AFUA_3G15060	Afu3G15060	Glyoxalase family protein; putative [Source:UniProtKB/TrEMBL
CADAFUAG00002812	627.293	-1.36423	0.170703	-7.99178	1.32999e-15	3.39374e-14	AFUA_5G03770	Afu5G03770	Lipase; putative [Source:UniProtKB/TrEMBL
CADAFUAG00004483	113.411	-1.3639	0.208192	-6.55114	5.71004e-11	8.74221e-10	AFUA_2G14180	Afu2G14180	HEAT repeat protein [Source:UniProtKB/TrEMBL
CADAFUAG00001500	2457.57	-1.36102	0.53171	-2.5597	0.0104761	0.0294191	AFUA_6G00430	Afu6G00430	IgE-binding protein [Source:UniProtKB/TrEMBL
CADAFUAG00001311	2597.71	-1.35831	0.264682	-5.13186	2.86886e-07	2.51044e-06	AFUA_4G02840	Afu4G02840	NmrA-like family protein; putative [Source:UniProtKB/TrEMBL
CADAFUAG00009621	1944.79	-1.35682	0.140402	-9.66381	4.2958e-22	1.89835e-20	AFUA_7G06570	Afu7G06570	Cation diffusion facilitator family metal ion transporter; putative [Source:UniProtKB/TrEMBL
CADAFUAG00000929	6.65327	-1.35464	0.899718	-1.50563	0.132162	0.231753	AFUA_8G01450	Afu8G01450	GABA permease; putative [Source:UniProtKB/TrEMBL
CADAFUAG00001086	75.3824	-1.34384	0.427296	-3.14498	0.00166098	0.00602991	AFUA_7G00970	Afu7G00970	GPI anchored serine-threonine rich protein [Source:UniProtKB/TrEMBL
CADAFUAG00009880	1.07946e+06	-1.34382	1.04568	-1.28511	0.198752	0.319754			28s_rRNA [Source:RNAMMER
CADAFUAG00007352	913.804	-1.33125	0.132349	-10.0586	8.4159e-24	4.15327e-22	AFUA_1G16560	Afu1G16560	MIF domain protein [Source:UniProtKB/TrEMBL
CADAFUAG00004163	111.244	-1.33065	0.260384	-5.11034	3.21577e-07	2.78892e-06	AFUA_2G12550	Afu2G12550	MFS multidrug transporter; putative [Source:UniProtKB/TrEMBL
CADAFUAG00004252	186.262	-1.32483	0.268792	-4.92882	8.27288e-07	6.63058e-06	AFUA_2G16985	Afu2G16985	Integral membrane protein [Source:UniProtKB/TrEMBL
CADAFUAG00005782	818.882	-1.32352	0.141347	-9.36368	7.70097e-21	3.05587e-19	AFUA_3G09290	Afu3G09290	Phosphoglycerate mutase; 2;3-bisphosphoglycerate-independent [Source:UniProtKB/TrEMBL
CADAFUAG00000229	26.8293	-1.31875	0.279754	-4.71396	2.42947e-06	1.78393e-05	AFUA_3G00520	Afu3G00520	SIR2 family histone deacetylase; putative [Source:UniProtKB/TrEMBL
CADAFUAG00009884	1.60606e+06	-1.31836	1.09847	-1.20018	0.230069	0.357361			28s_rRNA [Source:RNAMMER
CADAFUAG00002454	241.308	-1.31729	0.355256	-3.70802	0.000208888	0.000978704	AFUA_4G00280	Afu4G00280	Putative uncharacterized protein [Source:UniProtKB/TrEMBL
CADAFUAG00009859	810776	-1.31624	0.885958	-1.48566	0.137368	0.238993			18s_rRNA [Source:RNAMMER
CADAFUAG00000851	53.3401	-1.31601	0.403942	-3.25792	0.00112233	0.00430236	AFUA_8G02000	Afu8G02000	Sorbitol/xylitol dehydrogenase; putative [Source:UniProtKB/TrEMBL
CADAFUAG00006377	67.9129	-1.3157	0.222821	-5.90475	3.53182e-09	4.20273e-08	AFUA_5G14490	Afu5G14490	MFS transporter; putative [Source:UniProtKB/TrEMBL
CADAFUAG00005755	110.434	-1.31483	0.194333	-6.76585	1.32526e-11	2.18747e-10	AFUA_3G06800	Afu3G06800	Putative uncharacterized protein [Source:UniProtKB/TrEMBL
CADAFUAG00001277	166.164	-1.31458	0.341723	-3.84692	0.00011961	0.000601385	AFUA_4G04330	Afu4G04330	THO complex subunit Tho1; putative [Source:UniProtKB/TrEMBL
CADAFUAG00005304	5.23724	-1.31355	0.588474	-2.23214	0.0256059	0.0621966	AFUA_3G13650	Afu3G13650	Integral membrane protein [Source:UniProtKB/TrEMBL
CADAFUAG00005225	342.334	-1.3131	0.205394	-6.39308	1.62579e-10	2.35557e-09	AFUA_3G08480	Afu3G08480	Sucrose transporter; putative [Source:UniProtKB/TrEMBL
CADAFUAG00007581	42.8346	-1.31213	0.223598	-5.86826	4.404e-09	5.17723e-08	AFUA_1G09310	Afu1G09310	DUF6 domain protein; putative [Source:UniProtKB/TrEMBL
CADAFUAG00008944	168.532	-1.31146	0.20788	-6.30871	2.81365e-10	3.90218e-09	AFUA_1G04380	Afu1G04380	F-box domain protein [Source:UniProtKB/TrEMBL
CADAFUAG00007979	1255.21	-1.31113	0.18878	-6.94528	3.7771e-12	6.58082e-11	AFUA_4G13990	Afu4G13990	Putative uncharacterized protein [Source:UniProtKB/TrEMBL
CADAFUAG00008368	2.63247	-1.31073	0.853116	-1.5364	0.124441	0.220971	AFUA_4G08150	Afu4G08150	Putative uncharacterized protein [Source:UniProtKB/TrEMBL
CADAFUAG00000709	306.039	-1.30976	0.17632	-7.4283	1.10006e-13	2.27065e-12	AFUA_6G02460	Afu6G02460	Glucosamine 6-phosphate acetyltransferase; putative [Source:UniProtKB/TrEMBL
CADAFUAG00000870	40.1872	-1.30858	0.370407	-3.53281	0.000411164	0.00178852	AFUA_8G01570	Afu8G01570	ADP-ribosylglycohydrolase family protein [Source:UniProtKB/TrEMBL
CADAFUAG00002956	12.6801	-1.30745	0.408587	-3.19993	0.00137459	0.00512612	AFUA_8G05420	Afu8G05420	Putative uncharacterized protein [Source:UniProtKB/TrEMBL
CADAFUAG00006277	203.918	-1.30495	0.263934	-4.94421	7.64528e-07	6.17851e-06	AFUA_5G08490	Afu5G08490	Putative uncharacterized protein [Source:UniProtKB/TrEMBL
CADAFUAG00002434	25.7153	-1.303	0.402317	-3.23874	0.0012006	0.00455946	AFUA_4G00500	Afu4G00500	Putative uncharacterized protein [Source:UniProtKB/TrEMBL
CADAFUAG00005637	1398.11	-1.29929	0.309199	-4.20212	2.64431e-05	0.000155711	AFUA_3G07690	Afu3G07690	Cytochrome c oxidase copper chaperone Cox17; putative [Source:UniProtKB/TrEMBL
CADAFUAG00006116	76.6694	-1.29841	0.190002	-6.83368	8.27624e-12	1.38967e-10	AFUA_5G13725	Afu5G13725	Integral membrane protein [Source:UniProtKB/TrEMBL
CADAFUAG00001551	17.9353	-1.29793	0.383112	-3.38786	0.000704395	0.00285935	AFUA_6G00110	Afu6G00110	Dihydrodipicolinate synthetase family protein [Source:UniProtKB/TrEMBL
CADAFUAG00008889	0.602541	-1.29635	2.1002	-0.61725	0.53707	0.669066	AFUA_1G00810	Afu1G00810	Allergen Asp F7-like; putative [Source:UniProtKB/TrEMBL
CADAFUAG00003336	625.839	-1.29633	0.389493	-3.32824	0.000873968	0.00344974	AFUA_2G06120	Afu2G06120	Putative uncharacterized protein [Source:UniProtKB/TrEMBL
CADAFUAG00002637	239.138	-1.28771	0.296037	-4.34981	1.36258e-05	8.59638e-05	AFUA_5G02330	Afu5G02330	Ribonuclease mitogillin Aspf1 [Source:UniProtKB/Swiss-Prot
CADAFUAG00008197	76.5748	-1.28703	0.182783	-7.04129	1.90472e-12	3.41655e-11	AFUA_4G13960	Afu4G13960	2-dehydropantoate 2-reductase [Source:UniProtKB/TrEMBL
CADAFUAG00009546	82.0172	-1.28486	0.281347	-4.56681	4.95211e-06	3.40966e-05	AFUA_7G05570	Afu7G05570	Putative uncharacterized protein [Source:UniProtKB/TrEMBL
CADAFUAG00005960	1653.27	-1.28409	0.210656	-6.09568	1.0897e-09	1.39212e-08	AFUA_5G06010	Afu5G06010	Eukaryotic translation initiation factor 6 [Source:UniProtKB/TrEMBL
CADAFUAG00000198	306.465	-1.28118	0.204499	-6.26494	3.7296e-10	5.09258e-09	AFUA_3G00960	Afu3G00960	Putative uncharacterized protein [Source:UniProtKB/TrEMBL
CADAFUAG00003844	1231.21	-1.2783	0.101964	-12.5368	4.69634e-36	5.07309e-34	AFUA_2G02440	Afu2G02440	Putative uncharacterized protein [Source:UniProtKB/TrEMBL
CADAFUAG00008207	56.8382	-1.27812	0.368588	-3.4676	0.000525128	0.00221296	AFUA_4G08620	Afu4G08620	Putative uncharacterized protein [Source:UniProtKB/TrEMBL
CADAFUAG00003466	266.367	-1.27699	0.155677	-8.20283	2.34789e-16	6.4299e-15	AFUA_2G01270	Afu2G01270	Ferric-chelate reductase; putative [Source:UniProtKB/TrEMBL
CADAFUAG00009414	29.136	-1.27611	0.563877	-2.26311	0.023629	0.0582458	AFUA_7G05120	Afu7G05120	Integral membrane protein (Pth11); putative [Source:UniProtKB/TrEMBL
CADAFUAG00003358	144.264	-1.27505	0.19968	-6.38546	1.70888e-10	2.4686e-09	AFUA_2G00670	Afu2G00670	Protein kinase; putative [Source:UniProtKB/TrEMBL
CADAFUAG00009801	0.846662	-1.2747	1.80298	-0.706993	0.479571	0.615822	AFUA_5G09943	Afu5G09943
CADAFUAG00007191	4.81762	-1.2724	0.683676	-1.86111	0.0627286	0.128012	AFUA_1G17520	Afu1G17520	D-lactate dehydrogenase (Cytochrome); putative [Source:UniProtKB/TrEMBL
CADAFUAG00000987	7.09873	-1.27227	0.505267	-2.51801	0.0118018	0.032522	AFUA_8G00670	Afu8G00670	Integral membrane protein [Source:UniProtKB/TrEMBL
CADAFUAG00001960	11935.5	-1.27128	0.171525	-7.41164	1.24742e-13	2.54778e-12	AFUA_6G06770	Afu6G06770	Enolase [Source:UniProtKB/Swiss-Prot
CADAFUAG00001198	5.11743	-1.26842	0.683345	-1.85619	0.0634266	0.12903	AFUA_7G01130	Afu7G01130	Putative uncharacterized protein [Source:UniProtKB/TrEMBL
CADAFUAG00004537	191.587	-1.26708	0.161176	-7.86148	3.79634e-15	9.22701e-14	AFUA_2G07570	Afu2G07570	Glutamate 5-kinase; putative [Source:UniProtKB/TrEMBL
CADAFUAG00005986	0.96671	-1.26275	1.71572	-0.735986	0.461739	0.598965	AFUA_5G13820	Afu5G13820	Putative uncharacterized protein [Source:UniProtKB/TrEMBL
CADAFUAG00004159	25.5646	-1.26133	0.372648	-3.38478	0.000712349	0.00288922	AFUA_2G09120	Afu2G09120	SNF2 family helicase; putative [Source:UniProtKB/TrEMBL
CADAFUAG00003236	98.5747	-1.25862	0.320713	-3.92446	8.69255e-05	0.000450955	AFUA_8G04290	Afu8G04290	C2H2 finger domain protein; putative [Source:UniProtKB/TrEMBL
CADAFUAG00000912	133.798	-1.25582	0.333642	-3.76399	0.000167227	0.000800875	AFUA_8G01940	Afu8G01940	C6 finger domain protein; putative [Source:UniProtKB/TrEMBL
CADAFUAG00004137	105.12	-1.25485	0.193152	-6.49667	8.2115e-11	1.23579e-09	AFUA_2G17060	Afu2G17060	60S ribosome subunit biogenesis protein NIP7 [Source:UniProtKB/TrEMBL
CADAFUAG00001675	5.99631	-1.25246	0.762897	-1.64172	0.100648	0.186437	AFUA_6G09356	Afu6G09356	Putative uncharacterized protein [Source:UniProtKB/TrEMBL
CADAFUAG00006575	112.397	-1.2524	0.180506	-6.93823	3.97043e-12	6.90529e-11	AFUA_5G08150	Afu5G08150	ABC bile acid transporter; putative [Source:UniProtKB/TrEMBL
CADAFUAG00005529	249.004	-1.25236	0.167958	-7.45643	8.89012e-14	1.86271e-12	AFUA_3G08220	Afu3G08220	NUDIX domain protein [Source:UniProtKB/TrEMBL
CADAFUAG00008665	109.385	-1.25202	0.203581	-6.14996	7.75015e-10	1.01683e-08	AFUA_1G02770	Afu1G02770	Putative uncharacterized protein [Source:UniProtKB/TrEMBL
CADAFUAG00004706	1.78613	-1.25193	1.00126	-1.25034	0.211174	0.335189	AFUA_2G17380	Afu2G17380	Putative uncharacterized protein [Source:UniProtKB/TrEMBL
CADAFUAG00000828	2120.61	-1.25034	0.144929	-8.62726	6.28416e-18	1.92122e-16	AFUA_8G02850	Afu8G02850	Actin binding protein; putative [Source:UniProtKB/TrEMBL
CADAFUAG00005208	10219.6	-1.24695	0.178532	-6.98444	2.85986e-12	5.04602e-11	AFUA_3G11690	Afu3G11690	Fructose-bisphosphate aldolase; class II [Source:UniProtKB/TrEMBL
CADAFUAG00002785	6.66301	-1.24064	0.57151	-2.17081	0.0299452	0.0706277	AFUA_5G03650	Afu5G03650	Adenylate kinase family protein [Source:UniProtKB/TrEMBL
CADAFUAG00002456	28.5543	-1.23973	0.550286	-2.25288	0.0242669	0.0594864	AFUA_4G01150	Afu4G01150	N;N-dimethylglycine oxidase [Source:UniProtKB/TrEMBL
CADAFUAG00000096	47.7164	-1.23929	0.303468	-4.08377	4.431e-05	0.000247854	AFUA_3G02800	Afu3G02800	Lipase/esterase; putative [Source:UniProtKB/TrEMBL
CADAFUAG00000751	161.991	-1.23875	0.206479	-5.99942	1.98022e-09	2.45558e-08	AFUA_6G03980	Afu6G03980	Hexokinase; putative [Source:UniProtKB/TrEMBL
CADAFUAG00009280	1061.15	-1.23587	0.216018	-5.72115	1.05807e-08	1.16892e-07	AFUA_1G06210	Afu1G06210	N-acetylglucosamine-phosphate mutase [Source:UniProtKB/TrEMBL
CADAFUAG00008741	1023.49	-1.23474	0.152984	-8.07104	6.9704e-16	1.83152e-14	AFUA_1G06950	Afu1G06950	Lipoyltransferase and lipoate-protein ligase; putative [Source:UniProtKB/TrEMBL
CADAFUAG00009374	2.18128	-1.23441	1.05439	-1.17073	0.241706	0.37152	AFUA_7G06850	Afu7G06850	Phosphoserine phosphatase; putative [Source:UniProtKB/TrEMBL
CADAFUAG00004217	370.839	-1.23352	0.182252	-6.76823	1.30369e-11	2.15757e-10	AFUA_2G15040	Afu2G15040	Ubiquitin conjugating enzyme; putative [Source:UniProtKB/TrEMBL
CADAFUAG00003110	883.221	-1.23117	0.223111	-5.51816	3.4256e-08	3.49095e-07	AFUA_8G04870	Afu8G04870	NAD binding Rossmann fold oxidoreductase; putative [Source:UniProtKB/TrEMBL
CADAFUAG00008119	36.3975	-1.2274	0.321812	-3.81403	0.000136719	0.000674712	AFUA_4G13980	Afu4G13980	Putative uncharacterized protein [Source:UniProtKB/TrEMBL
CADAFUAG00007210	234.004	-1.22636	0.315736	-3.88414	0.000102693	0.000525733	AFUA_1G14450	Afu1G14450	Exo-beta-1;3-glucanase Exg0 [Source:UniProtKB/TrEMBL
CADAFUAG00000846	75.7093	-1.22568	0.248431	-4.93369	8.06918e-07	6.49947e-06	AFUA_8G00680	Afu8G00680	Glycosyl transferase; putative [Source:UniProtKB/TrEMBL
CADAFUAG00006970	90.7904	-1.22499	0.372777	-3.28612	0.00101578	0.00394229	AFUA_1G16610	Afu1G16610	SWR1-complex protein 5 [Source:UniProtKB/Swiss-Prot
CADAFUAG00000699	172.053	-1.22302	0.205407	-5.95415	2.61425e-09	3.18094e-08	AFUA_6G02140	Afu6G02140	Peptidyl-prolyl cis-trans isomerase-like 1 [Source:UniProtKB/Swiss-Prot
CADAFUAG00005872	1242.14	-1.22216	0.310549	-3.9355	8.30247e-05	0.000433029	AFUA_3G05440	Afu3G05440	DNA repair protein Rad18; putative [Source:UniProtKB/TrEMBL
CADAFUAG00000850	73.4543	-1.22018	0.310274	-3.9326	8.40318e-05	0.000437578	AFUA_8G01330	Afu8G01330	Putative uncharacterized protein [Source:UniProtKB/TrEMBL
CADAFUAG00006318	179.817	-1.21981	0.307363	-3.96862	7.229e-05	0.000384466	AFUA_5G05590	Afu5G05590	Aspartokinase [Source:UniProtKB/TrEMBL
CADAFUAG00006328	15.6189	-1.21947	0.530919	-2.2969	0.0216245	0.0540862	AFUA_5G14570	Afu5G14570	Putative uncharacterized protein [Source:UniProtKB/TrEMBL
CADAFUAG00007911	183.013	-1.21435	0.352848	-3.44157	0.000578354	0.00240289	AFUA_4G08400	Afu4G08400	Putative uncharacterized protein [Source:UniProtKB/TrEMBL
CADAFUAG00002459	0.886809	-1.21222	1.40314	-0.863936	0.387623	0.529354	AFUA_4G00110	Afu4G00110	TfdA family taurine dioxygenase; putative [Source:UniProtKB/TrEMBL
CADAFUAG00005788	0.883762	-1.20857	1.85408	-0.651843	0.514502	0.648514	AFUA_3G15210	Afu3G15210	Endo-1;4-beta-xylanase; putative [Source:UniProtKB/TrEMBL
CADAFUAG00002502	14.0121	-1.19401	0.483759	-2.46818	0.01358	0.0366592	AFUA_4G01322	Afu4G01322	C6 transcription factor; putative [Source:UniProtKB/TrEMBL
CADAFUAG00007207	24.5139	-1.19193	0.373459	-3.19161	0.00141484	0.00526007	AFUA_1G16640	Afu1G16640	Putative uncharacterized protein [Source:UniProtKB/TrEMBL
CADAFUAG00003679	99.3323	-1.19177	0.242289	-4.9188	8.70777e-07	6.95048e-06	AFUA_2G02580	Afu2G02580	HAD superfamily hydrolase; putative [Source:UniProtKB/TrEMBL
CADAFUAG00005646	0.729099	-1.19047	1.68114	-0.708132	0.478863	0.615564	AFUA_3G11890	Afu3G11890	Thermolabile L-asparaginase; putative [Source:UniProtKB/TrEMBL
CADAFUAG00002779	2490.16	-1.18862	0.11245	-10.5702	4.09836e-26	2.37168e-24	AFUA_5G01880	Afu5G01880	Putative uncharacterized protein [Source:UniProtKB/TrEMBL
CADAFUAG00004069	195.229	-1.18776	0.131367	-9.04151	1.5452e-19	5.34606e-18	AFUA_2G15740	Afu2G15740	Short chain dehydrogenase/oxidoreductase; putative [Source:UniProtKB/TrEMBL
CADAFUAG00008746	48.2644	-1.18482	0.23648	-5.01023	5.43637e-07	4.49808e-06	AFUA_1G02390	Afu1G02390	Alpha/beta hydrolase; putative [Source:UniProtKB/TrEMBL
CADAFUAG00002286	80.4276	-1.18272	0.191139	-6.18774	6.10342e-10	8.1062e-09	AFUA_6G08430	Afu6G08430	RNA binding protein Pym; putative [Source:UniProtKB/TrEMBL
CADAFUAG00001215	1.96299	-1.1815	1.23828	-0.954143	0.340012	0.481163	AFUA_7G00560	Afu7G00560	Putative uncharacterized protein [Source:UniProtKB/TrEMBL
CADAFUAG00009849	7212.34	-1.17847	0.224421	-5.25115	1.51149e-07	1.37849e-06			Small nucleolar RNA U3 [Source:RFAM
CADAFUAG00006133	978.296	-1.17821	0.279284	-4.21868	2.45742e-05	0.000145766	AFUA_5G10960	Afu5G10960	Putative uncharacterized protein [Source:UniProtKB/TrEMBL
CADAFUAG00002461	212.687	-1.17817	0.335241	-3.51438	0.00044078	0.00190118	AFUA_4G01400	Afu4G01400	ThiJ/PfpI family protein [Source:UniProtKB/TrEMBL
CADAFUAG00001075	217.67	-1.17725	0.266014	-4.42553	9.62061e-06	6.26048e-05	AFUA_7G00210	Afu7G00210	C6 transcription factor; putative [Source:UniProtKB/TrEMBL
CADAFUAG00007294	176.814	-1.17719	0.140106	-8.40215	4.38393e-17	1.28763e-15	AFUA_1G12590	Afu1G12590	RNA-binding La domain protein [Source:UniProtKB/TrEMBL
CADAFUAG00006861	7.44074	-1.17341	0.527392	-2.22494	0.0260854	0.0629912	AFUA_1G17370	Afu1G17370	Heat shock protein Awh11; putative [Source:UniProtKB/TrEMBL
CADAFUAG00003757	0.990758	-1.17304	1.59107	-0.737262	0.460963	0.598489	AFUA_2G00200	Afu2G00200	Catalase; putative [Source:UniProtKB/TrEMBL
CADAFUAG00007167	273.953	-1.17093	0.11931	-9.81424	9.77696e-23	4.54792e-21	AFUA_1G13910	Afu1G13910	TFIIH complex helicase Rad3; putative [Source:UniProtKB/TrEMBL
CADAFUAG00009357	484.328	-1.17058	0.153536	-7.62411	2.45721e-14	5.44169e-13	AFUA_7G04070	Afu7G04070	Phospho-2-dehydro-3-deoxyheptonate aldolase [Source:UniProtKB/TrEMBL
CADAFUAG00004752	120.066	-1.16841	0.390003	-2.99589	0.00273644	0.00924382	AFUA_2G17300	Afu2G17300	Glutathione S-transferase [Source:UniProtKB/TrEMBL
CADAFUAG00001271	172.46	-1.16826	0.156745	-7.45323	9.10802e-14	1.90018e-12	AFUA_4G02790	Afu4G02790	Carbon-nitrogen family hydrolase; putative [Source:UniProtKB/TrEMBL
CADAFUAG00000088	1070.3	-1.16784	0.271992	-4.29366	1.75751e-05	0.000107733	AFUA_3G00200	Afu3G00200	Hexose transporter protein [Source:UniProtKB/TrEMBL
CADAFUAG00002179	186.583	-1.16602	0.222647	-5.23708	1.63138e-07	1.48365e-06	AFUA_6G14460	Afu6G14460	Haloalkanoic acid dehalogenase; putative [Source:UniProtKB/TrEMBL
CADAFUAG00001111	5.14448	-1.16545	0.631405	-1.84581	0.0649204	0.131738	AFUA_7G00870	Afu7G00870	RNA exonuclease; putative [Source:UniProtKB/TrEMBL
CADAFUAG00002404	49.97	-1.16458	0.222424	-5.23584	1.64233e-07	1.49222e-06	AFUA_4G00990	Afu4G00990	MFS quinate transporter; putative [Source:UniProtKB/TrEMBL
CADAFUAG00007507	251.451	-1.15741	0.185587	-6.23648	4.4752e-10	6.04277e-09	AFUA_1G10030	Afu1G10030	Putative uncharacterized protein [Source:UniProtKB/TrEMBL
CADAFUAG00009365	815.39	-1.15626	0.21907	-5.27803	1.30578e-07	1.19988e-06	AFUA_7G05220	Afu7G05220	Mitochondrial carrier protein; putative [Source:UniProtKB/TrEMBL
CADAFUAG00007930	659.625	-1.15036	0.411552	-2.79517	0.00518727	0.016174	AFUA_4G10110	Afu4G10110	Homeobox transcription factor; putative [Source:UniProtKB/TrEMBL
CADAFUAG00004098	342.189	-1.15002	0.226475	-5.07793	3.81576e-07	3.25411e-06	AFUA_2G14760	Afu2G14760	BCS1-like ATPase; putative [Source:UniProtKB/TrEMBL
CADAFUAG00001540	444.471	-1.14977	0.119277	-9.63951	5.44484e-22	2.38445e-20	AFUA_6G00290	Afu6G00290	Aminotransferase; putative [Source:UniProtKB/TrEMBL
CADAFUAG00002162	1.66925	-1.14882	1.10795	-1.03689	0.299788	0.438342	AFUA_6G14500	Afu6G14500	MFS sugar transporter; putative [Source:UniProtKB/TrEMBL
CADAFUAG00003325	900.187	-1.14861	0.152272	-7.54314	4.58797e-14	9.84641e-13	AFUA_2G02890	Afu2G02890	tRNA splicing 2' phosphotransferase 1 [Source:UniProtKB/TrEMBL
CADAFUAG00004690	27.5035	-1.14499	0.313362	-3.65388	0.000258305	0.00118288	AFUA_2G15980	Afu2G15980	3' exoribonuclease family protein [Source:UniProtKB/TrEMBL
CADAFUAG00009891	0.50929	-1.14131	2.74486	-0.415799	0.677557	0.786656			8s_rRNA [Source:RNAMMER
CADAFUAG00001978	22743.5	-1.1405	0.125454	-9.09093	9.81987e-20	3.54903e-18	AFUA_6G06470	Afu6G06470	Heat shock protein Hsp30-like; putative [Source:UniProtKB/TrEMBL
CADAFUAG00008910	71.4387	-1.13944	0.467194	-2.43891	0.0147317	0.0391958	AFUA_1G06880	Afu1G06880	Mitochondrial export translocase Oxa2; putative [Source:UniProtKB/TrEMBL
CADAFUAG00008818	1962.29	-1.13768	0.0934077	-12.1797	3.98611e-34	3.72624e-32	AFUA_1G03680	Afu1G03680	Putative uncharacterized protein [Source:UniProtKB/TrEMBL
CADAFUAG00005926	1320.55	-1.13452	0.212078	-5.34954	8.81763e-08	8.39618e-07	AFUA_5G06390	Afu5G06390	Adenosine kinase; putative [Source:UniProtKB/TrEMBL
CADAFUAG00007117	28.1368	-1.13049	0.349271	-3.2367	0.00120919	0.00458673	AFUA_1G10020	Afu1G10020	Ribonuclease H1; putative [Source:UniProtKB/TrEMBL
CADAFUAG00006364	6.452	-1.12869	0.57465	-1.96414	0.0495136	0.106099	AFUA_5G06290	Afu5G06290	MFS transporter; putative [Source:UniProtKB/TrEMBL
CADAFUAG00002445	11.4403	-1.12773	0.443824	-2.54095	0.0110553	0.0307876	AFUA_4G00380	Afu4G00380	Putative uncharacterized protein [Source:UniProtKB/TrEMBL
CADAFUAG00000497	85.996	-1.1271	0.240372	-4.68898	2.74572e-06	2.00405e-05	AFUA_6G02900	Afu6G02900	Rad21/Rec8 N terminal domain protein [Source:UniProtKB/TrEMBL
CADAFUAG00005283	780.949	-1.12672	0.248078	-4.54181	5.57741e-06	3.79717e-05	AFUA_3G12170	Afu3G12170	MFS sugar transporter; putative [Source:UniProtKB/TrEMBL
CADAFUAG00004367	1.98946	-1.12638	1.0342	-1.08913	0.276098	0.412387	AFUA_2G13900	Afu2G13900
[truncated: 9,348 more rows]
