# Supplementary material for: The Transcriptome Response to Azole Compounds in Aspergillus fumigatus Shows Differential Gene Expression across Pathways Essential for Azole Resistance and Cell Survival
Source: J Fungi (Basel). 2023 Jul 30;9(8):807. doi: 10.3390/jof9080807 (PMC10455693; doi:10.3390/jof9080807)
Supplement: Supplementary file 1 [file jof-09-00807-s001.zip › Table S7 GO analysis results.xls]

## Sheet: GO147(S)ICZdown
GO ID	GO name	GO namespace	Exact p-value	Adjusted p-value	# genes / category	# genes / input
GO:0005575	cellular_component	CC	3.6846e-29	7.30289e-26	653 / 5435	654 / 1594
GO:0003735	structural constituent of ribosome	MF	1.25269e-26	1.24141e-23	73 / 129	73 / 1594
GO:0005730	nucleolus	CC	3.27748e-25	2.16532e-22	84 / 169	84 / 1594
GO:0005829	cytosol	CC	7.79441e-19	3.86213e-16	329 / 1347	329 / 1594
GO:0006412	translation	BP	9.79445e-19	3.88252e-16	53 / 97	53 / 1594
GO:0030686	90S preribosome	CC	8.34251e-16	2.75581e-13	28 / 37	28 / 1594
GO:0005840	ribosome	CC	1.55808e-14	4.41159e-12	37 / 64	37 / 1594
GO:0032040	small-subunit processome	CC	2.91562e-14	6.76223e-12	25 / 33	25 / 1594
GO:0002182	cytoplasmic translational elongation	BP	3.07064e-14	6.76223e-12	1 / 205	1 / 1594
GO:0008150	biological_process	BP	1.23276e-12	2.44334e-10	584 / 4516	584 / 1594
GO:0000447	endonucleolytic cleavage in ITS1 to separate SSU-rRNA from 5.8S rRNA and LSU-rRNA from tricistronic rRNA transcript (SSU-rRNA, 5.8S rRNA, LSU-rRNA)	BP	1.31257e-11	2.36501e-09	18 / 22	18 / 1594
GO:0005739	mitochondrion	CC	2.19543e-09	3.49055e-07	104 / 376	104 / 1594
GO:0022625	cytosolic large ribosomal subunit	CC	2.40124e-09	3.49055e-07	14 / 17	14 / 1594
GO:0022627	cytosolic small ribosomal subunit	CC	2.46558e-09	3.49055e-07	17 / 24	17 / 1594
GO:0003674	molecular_function	MF	3.324e-08	4.39211e-06	618 / 4551	618 / 1594
GO:0030687	preribosome, large subunit precursor	CC	3.72797e-08	4.61802e-06	17 / 27	17 / 1594
GO:0006526	arginine biosynthetic process	BP	5.96291e-08	6.95205e-06	9 / 9	9 / 1594
GO:0000472	endonucleolytic cleavage to generate mature 5'-end of SSU-rRNA from (SSU-rRNA, 5.8S rRNA, LSU-rRNA)	BP	6.57038e-08	7.23472e-06	12 / 15	12 / 1594
GO:0006096	glycolytic process	BP	8.83264e-08	9.21383e-06	10 / 11	10 / 1594
GO:0005634	nucleus	CC	1.31878e-07	1.30691e-05	298 / 1445	299 / 1594
GO:0000480	endonucleolytic cleavage in 5'-ETS of tricistronic rRNA transcript (SSU-rRNA, 5.8S rRNA, LSU-rRNA)	BP	3.36105e-07	3.17219e-05	11 / 14	11 / 1594
GO:0002181	cytoplasmic translation	BP	5.13824e-07	4.54784e-05	14 / 22	14 / 1594
GO:0005622	intracellular	CC	5.27751e-07	4.54784e-05	64 / 221	64 / 1594
GO:0006414	translational elongation	BP	2.41849e-06	0.000199727	9 / 11	9 / 1594
GO:0006730	one-carbon metabolic process	BP	2.93766e-06	0.000232898	8 / 9	8 / 1594
GO:0000027	ribosomal large subunit assembly	BP	4.39184e-06	0.000334794	13 / 22	13 / 1594
GO:0044416	induction by symbiont of host defense response	BP	8.31071e-06	0.000610068	9 / 12	9 / 1594
GO:0003723	RNA binding	MF	8.72743e-06	0.000617777	39 / 123	39 / 1594
GO:0009986	cell surface	CC	1.00675e-05	0.000688059	27 / 72	27 / 1594
GO:0030515	snoRNA binding	MF	1.26403e-05	0.000835103	8 / 10	8 / 1594
GO:0000463	maturation of LSU-rRNA from tricistronic rRNA transcript (SSU-rRNA, 5.8S rRNA, LSU-rRNA)	BP	1.58433e-05	0.00101295	11 / 18	11 / 1594
GO:0032153	cell division site	CC	2.24957e-05	0.00139333	4 / 120	4 / 1594
GO:0051287	NAD binding	MF	6.44439e-05	0.00365984	16 / 37	16 / 1594
GO:0009514	glyoxysome	CC	6.44439e-05	0.00365984	16 / 37	16 / 1594
GO:0000028	ribosomal small subunit assembly	BP	6.46289e-05	0.00365984	7 / 9	7 / 1594
GO:0000056	ribosomal small subunit export from nucleus	BP	9.28759e-05	0.00511334	6 / 7	6 / 1594
GO:0042254	ribosome biogenesis	BP	0.000103074	0.00552143	8 / 12	8 / 1594
GO:0000462	maturation of SSU-rRNA from tricistronic rRNA transcript (SSU-rRNA, 5.8S rRNA, LSU-rRNA)	BP	0.000110727	0.00577531	11 / 21	11 / 1594
GO:0009086	methionine biosynthetic process	BP	0.000120072	0.00610213	9 / 15	9 / 1594
GO:0006364	rRNA processing	BP	0.0001585	0.00785367	14 / 32	14 / 1594
GO:0006189	'de novo' IMP biosynthetic process	BP	0.000321563	0.0155448	6 / 8	6 / 1594
GO:0006407	rRNA export from nucleus	BP	0.000441501	0.0208346	7 / 11	7 / 1594
GO:0030688	preribosome, small subunit precursor	CC	0.000507873	0.0228774	5 / 6	5 / 1594
GO:0042274	ribosomal small subunit biogenesis	BP	0.000507873	0.0228774	5 / 6	5 / 1594
GO:0030170	pyridoxal phosphate binding	MF	0.000535505	0.023586	22 / 67	22 / 1594
GO:0009113	purine nucleobase biosynthetic process	BP	0.000618585	0.0260859	4 / 4	4 / 1594
GO:0006097	glyoxylate cycle	BP	0.000618585	0.0260859	4 / 4	4 / 1594
GO:0000166	nucleotide binding	MF	0.00072524	0.0299464	88 / 398	88 / 1594
GO:0031307	integral component of mitochondrial outer membrane	CC	0.000835432	0.0331165	6 / 9	6 / 1594
GO:0003746	translation elongation factor activity	MF	0.000835432	0.0331165	6 / 9	6 / 1594
GO:0008080	N-acetyltransferase activity	MF	0.000918727	0.0357043	13 / 33	13 / 1594

## Sheet: GO147(S)ICZup
GO ID	GO name	GO namespace	Exact p-value	Adjusted p-value	# genes / category	# genes / input
GO:0002182	cytoplasmic translational elongation	BP	2.06567e-13	3.20592e-10	1 / 205	1 / 1499
GO:0005829	cytosol	CC	3.3701e-10	2.6152e-07	127 / 1347	127 / 1499
GO:0005634	nucleus	CC	5.03329e-06	0.00260389	159 / 1445	159 / 1499
GO:0005730	nucleolus	CC	9.86962e-06	0.00382941	7 / 169	7 / 1499
GO:0005575	cellular_component	CC	4.04241e-05	0.0125477	881 / 5435	881 / 1499
GO:0003723	RNA binding	MF	5.39093e-05	0.0139445	4 / 123	4 / 1499
GO:0005739	mitochondrion	CC	0.00011284	0.0250181	31 / 376	31 / 1499

## Sheet: GO147ISAdown
GO ID	GO name	GO namespace	Exact p-value	Adjusted p-value	# genes / category	# genes / input
GO:0003735	structural constituent of ribosome	MF	2.9453e-34	3.43717e-31	64 / 129	64 / 879
GO:0006412	translation	BP	6.38145e-27	3.72358e-24	49 / 97	49 / 879
GO:0022627	cytosolic small ribosomal subunit	CC	1.60164e-16	6.23039e-14	19 / 24	19 / 879
GO:0005840	ribosome	CC	7.78422e-15	2.27105e-12	29 / 64	29 / 879
GO:0005730	nucleolus	CC	2.88858e-09	6.74194e-07	40 / 169	40 / 879
GO:0009986	cell surface	CC	3.47294e-09	6.75487e-07	24 / 72	24 / 879
GO:0022625	cytosolic large ribosomal subunit	CC	1.51737e-08	2.52968e-06	11 / 17	11 / 879
GO:0003674	molecular_function	MF	3.37708e-08	4.92631e-06	318 / 4551	318 / 879
GO:0002181	cytoplasmic translation	BP	4.88435e-08	6.33337e-06	12 / 22	12 / 879
GO:0030686	90S preribosome	CC	1.62111e-07	1.89183e-05	15 / 37	15 / 879
GO:0032040	small-subunit processome	CC	2.13836e-07	2.2686e-05	14 / 33	14 / 879
GO:0006189	'de novo' IMP biosynthetic process	BP	2.6985e-07	2.62429e-05	7 / 8	7 / 879
GO:0000462	maturation of SSU-rRNA from tricistronic rRNA transcript (SSU-rRNA, 5.8S rRNA, LSU-rRNA)	BP	3.11978e-07	2.8006e-05	11 / 21	11 / 879
GO:0006407	rRNA export from nucleus	BP	4.08818e-07	3.1806e-05	8 / 11	8 / 879
GO:0006096	glycolytic process	BP	4.08818e-07	3.1806e-05	8 / 11	8 / 879
GO:0055114	oxidation-reduction process	BP	2.57581e-06	0.000187873	85 / 592	85 / 879
GO:0005575	cellular_component	CC	6.36495e-06	0.000436935	408 / 5435	409 / 879
GO:0009086	methionine biosynthetic process	BP	1.16107e-05	0.00075276	8 / 15	8 / 879
GO:0000028	ribosomal small subunit assembly	BP	2.82049e-05	0.00164576	6 / 9	6 / 879
GO:0006730	one-carbon metabolic process	BP	2.82049e-05	0.00164576	6 / 9	6 / 879
GO:0005576	extracellular region	CC	3.26927e-05	0.00181678	39 / 225	39 / 879
GO:0010106	cellular response to iron ion starvation	BP	3.74497e-05	0.00198654	8 / 17	8 / 879
GO:0008150	biological_process	BP	8.96626e-05	0.0045494	337 / 4516	337 / 879
GO:0005739	mitochondrion	CC	0.000112187	0.0054551	55 / 376	55 / 879
GO:0031177	phosphopantetheine binding	MF	0.000157329	0.00734412	11 / 36	11 / 879
GO:0005622	intracellular	CC	0.000231551	0.0103931	36 / 221	36 / 879
GO:0019344	cysteine biosynthetic process	BP	0.000263226	0.0105926	4 / 5	4 / 879
GO:0046084	adenine biosynthetic process	BP	0.000263226	0.0105926	4 / 5	4 / 879
GO:0015934	large ribosomal subunit	CC	0.000263226	0.0105926	4 / 5	4 / 879
GO:0030446	hyphal cell wall	CC	0.000409471	0.0159284	9 / 28	9 / 879
GO:0005829	cytosol	CC	0.000592047	0.0219995	151 / 1347	151 / 879
GO:0006002	fructose 6-phosphate metabolic process	BP	0.000653217	0.0219995	3 / 3	3 / 879
GO:0019379	sulfate assimilation, phosphoadenylyl sulfate reduction by phosphoadenylyl-sulfate reductase (thioredoxin)	BP	0.000653217	0.0219995	3 / 3	3 / 879
GO:0070181	small ribosomal subunit rRNA binding	MF	0.000653217	0.0219995	3 / 3	3 / 879
GO:0019184	nonribosomal peptide biosynthetic process	BP	0.000688833	0.0219995	6 / 14	6 / 879
GO:0042602	riboflavin reductase (NADPH) activity	MF	0.000735202	0.0219995	4 / 6	4 / 879
GO:0046938	phytochelatin biosynthetic process	BP	0.000735202	0.0219995	4 / 6	4 / 879
GO:0006071	glycerol metabolic process	BP	0.000735202	0.0219995	4 / 6	4 / 879
GO:0005315	inorganic phosphate transmembrane transporter activity	MF	0.000735202	0.0219995	4 / 6	4 / 879
GO:0016491	oxidoreductase activity	MF	0.000793819	0.0231597	46 / 321	46 / 879
GO:0000166	nucleotide binding	MF	0.000992346	0.0276753	54 / 398	54 / 879
GO:0003723	RNA binding	MF	0.000996025	0.0276753	22 / 123	22 / 879

## Sheet: GO147ISAup
GO ID	GO name	GO namespace	Exact p-value	Adjusted p-value	# genes / category	# genes / input
GO:0002182	cytoplasmic translational elongation	BP	2.26216e-06	0.00268292	3 / 205	3 / 994
GO:0044550	secondary metabolite biosynthetic process	BP	6.84667e-05	0.0406007	10 / 25	10 / 994

## Sheet: GO162(R)ICZdown
GO ID	GO name	GO namespace	Exact p-value	Adjusted p-value	# genes / category	# genes / input
GO:0003735	structural constituent of ribosome	MF	6.15666e-08	2.81359e-05	20 / 129	20 / 379
GO:0006412	translation	BP	5.535e-07	0.000126475	16 / 97	16 / 379
GO:0055114	oxidation-reduction process	BP	2.78381e-05	0.00424068	43 / 592	43 / 379
GO:0010181	FMN binding	MF	7.55758e-05	0.00863454	7 / 29	7 / 379
GO:0022627	cytosolic small ribosomal subunit	CC	0.000203172	0.0185699	6 / 24	6 / 379
GO:0016491	oxidoreductase activity	MF	0.000488855	0.0340782	25 / 321	25 / 379
GO:0006407	rRNA export from nucleus	BP	0.000521986	0.0340782	4 / 11	4 / 379

## Sheet: GO162(R)ICZup
GO ID	GO name	GO namespace	Exact p-value	Adjusted p-value	# genes / category	# genes / input
GO:0005524	ATP binding	MF	1.4099e-12	1.34223e-09	65 / 529	65 / 486
GO:0004386	helicase activity	MF	5.77597e-07	0.000274936	11 / 36	11 / 486
GO:0016887	ATPase activity	MF	7.63774e-05	0.0242371	10 / 48	10 / 486
GO:0006863	purine nucleobase transport	BP	0.000110932	0.0264019	3 / 3	3 / 486

## Sheet: GO162(R)ISAdown
GO ID	GO name	GO namespace	Exact p-value	Adjusted p-value	# genes / category	# genes / input
GO:0010106	cellular response to iron ion starvation	BP	6.81264e-06	0.00520069	9 / 17	9 / 951
GO:0005622	intracellular	CC	1.077e-05	0.00520069	42 / 221	42 / 951
GO:0005730	nucleolus	CC	1.42355e-05	0.00520069	2 / 169	2 / 951
GO:0030446	hyphal cell wall	CC	2.33152e-05	0.00551605	11 / 28	11 / 951
GO:0009986	cell surface	CC	2.51645e-05	0.00551605	19 / 72	19 / 951
GO:0055114	oxidation-reduction process	BP	6.11498e-05	0.01117	85 / 592	85 / 951
GO:0009086	methionine biosynthetic process	BP	0.000210363	0.030499	7 / 15	7 / 951
GO:0055085	transmembrane transport	BP	0.00022262	0.030499	60 / 399	60 / 951
GO:0005978	glycogen biosynthetic process	BP	0.000362112	0.0440972	4 / 5	4 / 951
GO:0009277	fungal-type cell wall	CC	0.000420327	0.0444081	11 / 37	11 / 951
GO:0003333	amino acid transmembrane transport	BP	0.000445702	0.0444081	13 / 49	13 / 951

## Sheet: GO162(R)ISAup
GO ID	GO name	GO namespace	Exact p-value	Adjusted p-value	# genes / category	# genes / input
GO:0002182	cytoplasmic translational elongation	BP	4.99033e-06	0.0043174	2 / 205	2 / 838
GO:0005730	nucleolus	CC	8.0026e-06	0.0043174	32 / 169	32 / 838
GO:0042797	tRNA transcription from RNA polymerase III promoter	BP	0.000177126	0.0477798	5 / 8	5 / 838
GO:0001056	RNA polymerase III activity	MF	0.000177126	0.0477798	5 / 8	5 / 838

## Sheet: GO181(Rpan)ISAdown
GO ID	GO name	GO namespace	Exact p-value	Adjusted p-value	# genes / category	# genes / input
GO:0070301	cellular response to hydrogen peroxide	BP	2.47308e-06	0.000309135	4 / 18	4 / 56
GO:0016597	amino acid binding	MF	0.00030028	0.0187675	2 / 5	2 / 56
GO:0097308	cellular response to farnesol	BP	0.000626094	0.0260873	2 / 7	2 / 56
GO:0034605	cellular response to heat	BP	0.00183373	0.0496327	3 / 44	3 / 56
GO:0006099	tricarboxylic acid cycle	BP	0.00304235	0.0496327	2 / 15	2 / 56
GO:0003993	acid phosphatase activity	MF	0.00304235	0.0496327	2 / 15	2 / 56
GO:0042806	fucose binding	MF	0.00555886	0.0496327	1 / 1	1 / 56
GO:0050421	nitrite reductase (NO-forming) activity	MF	0.00555886	0.0496327	1 / 1	1 / 56
GO:0008864	formyltetrahydrofolate deformylase activity	MF	0.00555886	0.0496327	1 / 1	1 / 56
GO:0016742	hydroxymethyl-, formyl- and related transferase activity	MF	0.00555886	0.0496327	1 / 1	1 / 56
GO:0004070	aspartate carbamoyltransferase activity	MF	0.00555886	0.0496327	1 / 1	1 / 56
GO:0015764	N-acetylglucosamine transport	BP	0.00555886	0.0496327	1 / 1	1 / 56
GO:0006541	glutamine metabolic process	BP	0.00555886	0.0496327	1 / 1	1 / 56
GO:0015572	N-acetylglucosamine transmembrane transporter activity	MF	0.00555886	0.0496327	1 / 1	1 / 56

## Sheet: GO181(Rpan)ISAup
GO ID	GO name	GO namespace	Exact p-value	Adjusted p-value	# genes / category	# genes / input
GO:0042626	ATPase activity, coupled to transmembrane movement of substances	MF	0.000169661	0.0331713	6 / 32	6 / 268
GO:0031072	heat shock protein binding	MF	0.000240812	0.0331713	6 / 34	6 / 268
GO:0051082	unfolded protein binding	MF	0.000275156	0.0331713	8 / 64	8 / 268
GO:0051087	chaperone binding	MF	0.000289705	0.0331713	4 / 13	4 / 268
GO:0042026	protein refolding	BP	0.000601949	0.0461374	3 / 7	3 / 268
GO:0042285	xylosyltransferase activity	MF	0.000705156	0.0461374	2 / 2	2 / 268
GO:0009044	xylan 1,4-beta-xylosidase activity	MF	0.000705156	0.0461374	2 / 2	2 / 268
GO:0006457	protein folding	BP	0.000815471	0.0466857	8 / 75	8 / 268
